# Supplementary material for: Multidimensional Gene Set Analysis of Genomic Data
Source: PLOS journal article supplement (doi:10.1371/journal.pone.0010348), 2010-04-27

# Combined functional profiling of dermatitis and psoriasis datasets using GO Biological Process

465 significant modules

**LOR** indicates Log Odds Ratio of the coefficient or the interaction

**p** indicates FDR adjusted p-value

|            | LOR t d | LOR t p | LOR In-ter | p t d | p t p | p Inter | pattern | name                                                                                         |
|------------|---------|---------|------------|-------|-------|---------|---------|----------------------------------------------------------------------------------------------|
| GO:0022403 | -0.13   | 0.36    | 0.11       | 0.11  | 0.00  | 0.01    | q1i     | cell cycle phase                                                                             |
| GO:0000279 | -0.06   | 0.37    | 0.12       | 0.55  | 0.00  | 0.03    | q1i     | M phase                                                                                      |
| GO:0051301 | -0.10   | 0.25    | 0.15       | 0.36  | 0.00  | 0.00    | q1i     | cell division                                                                                |
| GO:0000087 | -0.11   | 0.40    | 0.12       | 0.32  | 0.00  | 0.05    | q1i     | M phase of mitotic cell cycle                                                                |
| GO:0048015 | 0.08    | 0.07    | 0.16       | 0.72  | 0.68  | 0.05    | b13     | phosphoinositide-mediated signaling                                                          |
| GO:0000302 | 0.24    | -0.06   | 0.29       | 0.59  | 0.85  | 0.00    | b13     | response to reactive oxygen species                                                          |
| GO:0032945 | 0.43    | 0.33    | -0.79      | 0.26  | 0.39  | 0.00    | b24     | negative regulation of mononuclear cell proliferation                                        |
| GO:0050672 | 0.43    | 0.33    | -0.79      | 0.26  | 0.39  | 0.00    | b24     | negative regulation of lymphocyte proliferation                                              |
| GO:0048589 | -0.19   | -0.06   | -0.59      | 0.53  | 0.91  | 0.04    | b24     | developmental growth                                                                         |
| GO:0007028 | 0.21    | -0.11   | -0.75      | 0.47  | 0.83  | 0.00    | b24     | cytoplasm organization and biogenesis                                                        |
| GO:0007043 | 0.07    | -0.50   | -0.91      | 0.86  | 0.22  | 0.00    | b24     | cell-cell junction assembly                                                                  |
| GO:0045216 | 0.12    | -0.26   | -0.86      | 0.75  | 0.59  | 0.00    | b24     | cell-cell junction assembly and maintenance                                                  |
| GO:0009607 | 0.35    | 0.19    | 0.05       | 0.00  | 0.02  | 0.69    | q1f     | response to biotic stimulus                                                                  |
| GO:0051704 | 0.31    | 0.16    | 0.05       | 0.00  | 0.03  | 0.68    | q1f     | multi-organism process                                                                       |
| GO:0045893 | -0.23   | 0.24    | -0.05      | 0.00  | 0.00  | 0.78    | q2f     | positive regulation of transcription, DNA-dependent                                          |
| GO:0045935 | -0.19   | 0.23    | -0.05      | 0.01  | 0.00  | 0.72    | q2f     | positive regulation of nucleobase, nucleoside, nucleotide and nucleic acid metabolic process |
| GO:0045941 | -0.22   | 0.23    | -0.05      | 0.00  | 0.00  | 0.78    | q2f     | positive regulation of transcription                                                         |
| GO:0051254 | -0.23   | 0.24    | -0.05      | 0.00  | 0.00  | 0.78    | q2f     | positive regulation of RNA metabolic process                                                 |
| GO:0016481 | -0.36   | 0.18    | 0.05       | 0.00  | 0.02  | 0.61    | q2f     | negative regulation of transcription                                                         |
| GO:0045892 | -0.31   | 0.21    | 0.01       | 0.00  | 0.02  | 0.99    | q2f     | negative regulation of transcription, DNA-dependent                                          |
| GO:0045934 | -0.36   | 0.19    | 0.04       | 0.00  | 0.01  | 0.75    | q2f     | negative regulation of nucleobase, nucleoside, nucleotide and nucleic acid metabolic process |
| GO:0051253 | -0.33   | 0.22    | 0.00       | 0.00  | 0.01  | 0.99    | q2f     | negative regulation of RNA metabolic process                                                 |
| GO:0009719 | -0.20   | 0.30    | 0.04       | 0.00  | 0.00  | 0.73    | q2f     | response to endogenous stimulus                                                              |
| GO:0006281 | -0.23   | 0.19    | -0.01      | 0.01  | 0.03  | 0.99    | q2f     | DNA repair                                                                                   |
| GO:0006974 | -0.22   | 0.29    | 0.05       | 0.00  | 0.00  | 0.68    | q2f     | response to DNA damage stimulus                                                              |
| GO:0006512 | -0.42   | 0.16    | -0.01      | 0.00  | 0.03  | 0.95    | q2f     |                                                                                              |
| GO:0016567 | -0.41   | 0.36    | -0.04      | 0.00  | 0.01  | 0.93    | q2f     | protein ubiquitination                                                                       |
| GO:0032446 | -0.38   | 0.29    | -0.03      | 0.00  | 0.05  | 0.94    | q2f     | protein modification by small protein conjugation                                            |
| GO:0016125 | -0.34   | 0.31    | -0.05      | 0.02  | 0.03  | 0.87    | q2f     | sterol metabolic process                                                                     |
| GO:0006913 | -0.28   | 0.43    | -0.07      | 0.00  | 0.00  | 0.71    | q2f     | nucleocytoplasmic transport                                                                  |
| GO:0051169 | -0.28   | 0.43    | -0.07      | 0.00  | 0.00  | 0.71    | q2f     | nuclear transport                                                                            |
| GO:0006605 | -0.23   | 0.35    | -0.01      | 0.01  | 0.00  | 0.97    | q2f     | protein targeting                                                                            |
| GO:0006606 | -0.27   | 0.39    | -0.03      | 0.05  | 0.00  | 0.94    | q2f     | protein import into nucleus                                                                  |
| GO:0006886 | -0.18   | 0.27    | 0.00       | 0.00  | 0.00  | 0.99    | q2f     | intracellular protein transport                                                              |
| GO:0043285 | -0.18   | 0.18    | 0.02       | 0.02  | 0.03  | 0.93    | q2f     | biopolymer catabolic process                                                                 |
| GO:0008544 | -0.29   | 0.40    | 0.12       | 0.01  | 0.00  | 0.13    | q2f     | epidermis development                                                                        |
| GO:0030163 | -0.23   | 0.20    | 0.02       | 0.01  | 0.04  | 0.94    | q2f     | protein catabolic process                                                                    |
| GO:0016071 | -0.32   | 0.27    | -0.09      | 0.00  | 0.00  | 0.48    | q2f     | mRNA metabolic process                                                                       |
| GO:0008380 | -0.37   | 0.34    | -0.11      | 0.00  | 0.00  | 0.47    | q2f     | RNA splicing                                                                                 |
| GO:0006397 | -0.34   | 0.32    | -0.11      | 0.00  | 0.00  | 0.39    | q2f     | mRNA processing                                                                              |
| GO:0006403 | -0.34   | 0.35    | -0.06      | 0.03  | 0.02  | 0.85    | q2f     | RNA localization                                                                             |
| GO:0015931 | -0.39   | 0.40    | -0.04      | 0.01  | 0.00  | 0.93    | q2f     | nucleobase, nucleoside, nucleotide and nucleic acid transport                                |
| GO:0050657 | -0.36   | 0.38    | -0.05      | 0.02  | 0.01  | 0.90    | q2f     | nucleic acid transport                                                                       |
| GO:0051236 | -0.36   | 0.38    | -0.05      | 0.02  | 0.01  | 0.90    | q2f     | establishment of RNA localization                                                            |
| GO:0050658 | -0.36   | 0.38    | -0.05      | 0.02  | 0.01  | 0.90    | q2f     | RNA transport                                                                                |
| GO:0051028 | -0.39   | 0.34    | -0.04      | 0.02  | 0.04  | 0.94    | q2f     | mRNA transport                                                                               |
| GO:0022613 | -0.31   | 0.39    | 0.00       | 0.00  | 0.00  | 0.99    | q2f     | ribonucleoprotein complex biogenesis and assembly                                            |
| GO:0006413 | -0.50   | 0.39    | 0.05       | 0.00  | 0.00  | 0.81    | q2f     | translational initiation                                                                     |
| GO:0022618 | -0.48   | 0.40    | -0.02      | 0.00  | 0.00  | 0.95    | q2f     | ribonucleoprotein complex assembly                                                           |
| GO:0000082 | -0.51   | 0.47    | 0.07       | 0.02  | 0.02  | 0.82    | q2f     | G1/S transition of mitotic cell cycle                                                        |
| GO:0006888 | -0.46   | 0.41    | 0.03       | 0.00  | 0.00  | 0.92    | q2f     | ER to Golgi vesicle-mediated transport                                                       |
| GO:0040029 | -0.44   | 0.39    | 0.01       | 0.01  | 0.02  | 0.99    | q2f     | regulation of gene expression, epigenetic                                                    |
| GO:0000075 | -0.40   | 0.63    | 0.01       | 0.00  | 0.00  | 0.98    | q2f     | cell cycle checkpoint                                                                        |
| GO:0007093 | -0.43   | 0.57    | 0.05       | 0.02  | 0.00  | 0.87    | q2f     | mitotic cell cycle checkpoint                                                                |
| GO:0006470 | -0.24   | 0.25    | -0.10      | 0.03  | 0.03  | 0.65    | q2f     | protein amino acid dephosphorylation                                                         |
| GO:0007567 | -0.80   | 0.64    | 0.04       | 0.01  | 0.02  | 0.95    | q2f     | parturition                                                                                  |
| GO:0044257 | -0.39   | 0.30    | 0.05       | 0.00  | 0.00  | 0.80    | q2f     | cellular protein catabolic process                                                           |
| GO:0006511 | -0.40   | 0.29    | 0.05       | 0.00  | 0.00  | 0.80    | q2f     | ubiquitin-dependent protein catabolic process                                                |
| GO:0019941 | -0.39   | 0.30    | 0.05       | 0.00  | 0.00  | 0.78    | q2f     | modification-dependent protein catabolic process                                             |
| GO:0043632 | -0.39   | 0.30    | 0.05       | 0.00  | 0.00  | 0.78    | q2f     | modification-dependent macromolecule catabolic process                                       |

|            |       |       |       |      |      |      |     |                                                                                                                           |
|------------|-------|-------|-------|------|------|------|-----|---------------------------------------------------------------------------------------------------------------------------|
| GO:0051603 | -0.39 | 0.30  | 0.05  | 0.00 | 0.00 | 0.79 | q2f | proteolysis involved in cellular protein catabolic process                                                                |
| GO:0000375 | -0.44 | 0.36  | -0.14 | 0.00 | 0.01 | 0.61 | q2f | RNA splicing, via transesterification reactions                                                                           |
| GO:0000377 | -0.44 | 0.36  | -0.14 | 0.00 | 0.01 | 0.61 | q2f | RNA splicing, via transesterification reactions with bulged adenosine as nucleophile                                      |
| GO:0000398 | -0.44 | 0.36  | -0.14 | 0.00 | 0.01 | 0.61 | q2f | nuclear mRNA splicing, via spliceosome                                                                                    |
| GO:0045646 | -0.66 | 0.81  | -0.21 | 0.05 | 0.00 | 0.71 | q2f | regulation of erythrocyte differentiation                                                                                 |
| GO:0030216 | -0.48 | 0.61  | 0.15  | 0.02 | 0.00 | 0.38 | q2f | keratinocyte differentiation                                                                                              |
| GO:0016573 | -0.83 | -0.71 | -0.60 | 0.00 | 0.04 | 0.08 | q3f | histone acetylation                                                                                                       |
| GO:0006892 | -0.63 | -0.80 | -0.56 | 0.02 | 0.01 | 0.13 | q3f | post-Golgi vesicle-mediated transport                                                                                     |
| GO:0015698 | 0.50  | -0.28 | -0.27 | 0.00 | 0.05 | 0.22 | q4f | inorganic anion transport                                                                                                 |
| GO:0016477 | 0.26  | -0.20 | 0.08  | 0.00 | 0.02 | 0.52 | q4f | cell migration                                                                                                            |
| GO:0051239 | 0.22  | -0.22 | -0.03 | 0.01 | 0.00 | 0.87 | q4f | regulation of multicellular organismal process                                                                            |
| GO:0030182 | 0.20  | -0.34 | 0.04  | 0.04 | 0.00 | 0.81 | q4f | neuron differentiation                                                                                                    |
| GO:0016051 | 0.33  | -0.42 | -0.05 | 0.03 | 0.00 | 0.90 | q4f | carbohydrate biosynthetic process                                                                                         |
| GO:0030029 | 0.25  | -0.26 | 0.09  | 0.01 | 0.00 | 0.47 | q4f | actin filament-based process                                                                                              |
| GO:0030036 | 0.23  | -0.28 | 0.08  | 0.02 | 0.00 | 0.54 | q4f | actin cytoskeleton organization and biogenesis                                                                            |
| GO:0016337 | 0.23  | -0.22 | 0.03  | 0.02 | 0.01 | 0.87 | q4f | cell-cell adhesion                                                                                                        |
| GO:0031032 | 0.73  | -0.88 | 0.10  | 0.02 | 0.00 | 0.84 | q4f | actomyosin structure organization and biogenesis                                                                          |
| GO:0048627 | 0.85  | -0.80 | 0.11  | 0.00 | 0.00 | 0.80 | q4f | myoblast development                                                                                                      |
| GO:0048628 | 0.85  | -0.80 | 0.11  | 0.00 | 0.00 | 0.80 | q4f | myoblast maturation                                                                                                       |
| GO:0007600 | 0.18  | -0.23 | -0.02 | 0.01 | 0.00 | 0.90 | q4f | sensory perception                                                                                                        |
| GO:0031589 | 0.36  | -0.29 | 0.10  | 0.02 | 0.05 | 0.60 | q4f | cell-substrate adhesion                                                                                                   |
| GO:0050953 | 0.23  | -0.34 | -0.02 | 0.05 | 0.00 | 0.97 | q4f | sensory perception of light stimulus                                                                                      |
| GO:0007601 | 0.23  | -0.34 | -0.02 | 0.05 | 0.00 | 0.97 | q4f | visual perception                                                                                                         |
| GO:0043062 | 0.60  | -0.62 | 0.01  | 0.00 | 0.00 | 0.99 | q4f | extracellular structure organization and biogenesis                                                                       |
| GO:0030198 | 0.67  | -0.69 | 0.05  | 0.00 | 0.00 | 0.91 | q4f | extracellular matrix organization and biogenesis                                                                          |
| GO:0051046 | 0.49  | -0.42 | 0.04  | 0.03 | 0.04 | 0.94 | q4f | regulation of secretion                                                                                                   |
| GO:0006817 | 0.87  | -0.61 | -0.10 | 0.00 | 0.00 | 0.81 | q4f | phosphate transport                                                                                                       |
| GO:0032963 | 0.94  | -0.72 | 0.07  | 0.00 | 0.01 | 0.93 | q4f | collagen metabolic process                                                                                                |
| GO:0006957 | 1.12  | -0.88 | 0.17  | 0.02 | 0.03 | 0.79 | q4f | complement activation, alternative pathway                                                                                |
| GO:0006812 | 0.16  | 0.05  | -0.09 | 0.02 | 0.59 | 0.47 | xh  | cation transport                                                                                                          |
| GO:0030001 | 0.18  | -0.02 | -0.07 | 0.02 | 0.91 | 0.64 | xh  | metal ion transport                                                                                                       |
| GO:0019932 | 0.21  | 0.04  | 0.06  | 0.02 | 0.77 | 0.64 | xh  | second-messenger-mediated signaling                                                                                       |
| GO:0006820 | 0.47  | -0.16 | -0.26 | 0.00 | 0.28 | 0.15 | xh  | anion transport                                                                                                           |
| GO:0033238 | 0.44  | -0.12 | 0.14  | 0.05 | 0.62 | 0.54 | xh  | regulation of amine metabolic process                                                                                     |
| GO:0001932 | 0.51  | -0.15 | 0.15  | 0.02 | 0.55 | 0.48 | xh  | regulation of protein amino acid phosphorylation                                                                          |
| GO:0031401 | 0.58  | 0.11  | 0.02  | 0.04 | 0.80 | 0.99 | xh  | positive regulation of protein modification process                                                                       |
| GO:0006521 | 0.50  | -0.15 | 0.15  | 0.03 | 0.56 | 0.51 | xh  | regulation of amino acid metabolic process                                                                                |
| GO:0033240 | 0.76  | -0.05 | 0.08  | 0.01 | 0.91 | 0.90 | xh  | positive regulation of amine metabolic process                                                                            |
| GO:0001934 | 0.77  | -0.09 | 0.09  | 0.01 | 0.85 | 0.86 | xh  | positive regulation of protein amino acid phosphorylation                                                                 |
| GO:0050730 | 0.53  | -0.14 | 0.15  | 0.04 | 0.62 | 0.60 | xh  | regulation of peptidyl-tyrosine phosphorylation                                                                           |
| GO:0045764 | 0.77  | -0.09 | 0.09  | 0.01 | 0.85 | 0.86 | xh  | positive regulation of amino acid metabolic process                                                                       |
| GO:0050731 | 0.91  | -0.07 | 0.07  | 0.01 | 0.89 | 0.93 | xh  | positive regulation of peptidyl-tyrosine phosphorylation                                                                  |
| GO:0002682 | 0.27  | -0.04 | -0.11 | 0.02 | 0.85 | 0.66 | xh  | regulation of immune system process                                                                                       |
| GO:0002684 | 0.32  | -0.08 | -0.05 | 0.01 | 0.62 | 0.90 | xh  | positive regulation of immune system process                                                                              |
| GO:0048583 | 0.27  | -0.01 | -0.12 | 0.03 | 0.99 | 0.66 | xh  | regulation of response to stimulus                                                                                        |
| GO:0048584 | 0.37  | -0.06 | -0.07 | 0.01 | 0.79 | 0.82 | xh  | positive regulation of response to stimulus                                                                               |
| GO:0051240 | 0.30  | -0.13 | -0.01 | 0.01 | 0.37 | 0.99 | xh  | positive regulation of multicellular organismal process                                                                   |
| GO:0002694 | 0.33  | 0.13  | -0.15 | 0.03 | 0.51 | 0.66 | xh  | regulation of leukocyte activation                                                                                        |
| GO:0050865 | 0.33  | 0.13  | -0.15 | 0.03 | 0.51 | 0.66 | xh  | regulation of cell activation                                                                                             |
| GO:0051241 | 0.36  | -0.26 | -0.09 | 0.04 | 0.17 | 0.82 | xh  | negative regulation of multicellular organismal process                                                                   |
| GO:0051249 | 0.38  | 0.15  | -0.16 | 0.01 | 0.46 | 0.63 | xh  | regulation of lymphocyte activation                                                                                       |
| GO:0050878 | 0.31  | -0.18 | 0.03  | 0.02 | 0.19 | 0.94 | xh  | regulation of body fluid levels                                                                                           |
| GO:0007599 | 0.32  | -0.16 | 0.02  | 0.03 | 0.30 | 0.95 | xh  | hemostasis                                                                                                                |
| GO:0009611 | 0.39  | -0.04 | 0.09  | 0.00 | 0.67 | 0.17 | xh  | response to wounding                                                                                                      |
| GO:0050817 | 0.34  | -0.17 | 0.03  | 0.02 | 0.30 | 0.93 | xh  | coagulation                                                                                                               |
| GO:0006959 | 0.63  | 0.03  | 0.02  | 0.00 | 0.86 | 0.94 | xh  | humoral immune response                                                                                                   |
| GO:0051707 | 0.50  | 0.20  | 0.03  | 0.00 | 0.05 | 0.90 | xh  | response to other organism                                                                                                |
| GO:0007596 | 0.32  | -0.14 | 0.03  | 0.03 | 0.42 | 0.93 | xh  | blood coagulation                                                                                                         |
| GO:0019730 | 0.77  | 0.16  | -0.11 | 0.00 | 0.47 | 0.78 | xh  | antimicrobial humoral response                                                                                            |
| GO:0007610 | 0.28  | -0.03 | 0.08  | 0.00 | 0.73 | 0.32 | xh  | behavior                                                                                                                  |
| GO:0007626 | 0.33  | 0.00  | 0.08  | 0.00 | 0.99 | 0.54 | xh  | locomotory behavior                                                                                                       |
| GO:0042330 | 0.46  | 0.18  | 0.01  | 0.00 | 0.24 | 0.99 | xh  | taxis                                                                                                                     |
| GO:0002250 | 0.40  | -0.06 | -0.03 | 0.01 | 0.81 | 0.95 | xh  | adaptive immune response                                                                                                  |
| GO:0002252 | 0.32  | 0.03  | -0.01 | 0.02 | 0.87 | 0.99 | xh  | immune effector process                                                                                                   |
| GO:0002443 | 0.39  | 0.12  | -0.08 | 0.01 | 0.55 | 0.82 | xh  | leukocyte mediated immunity                                                                                               |
| GO:0002449 | 0.38  | 0.07  | -0.07 | 0.02 | 0.76 | 0.84 | xh  | lymphocyte mediated immunity                                                                                              |
| GO:0002460 | 0.40  | -0.06 | -0.03 | 0.01 | 0.81 | 0.95 | xh  | adaptive immune response based on somatic recombination of immune receptors built from immunoglobulin superfamily domains |
| GO:0016064 | 0.53  | -0.25 | -0.08 | 0.00 | 0.27 | 0.89 | xh  | immunoglobulin mediated immune response                                                                                   |
| GO:0019724 | 0.53  | -0.25 | -0.08 | 0.00 | 0.27 | 0.89 | xh  | B cell mediated immunity                                                                                                  |
| GO:0002696 | 0.46  | -0.05 | 0.04  | 0.01 | 0.84 | 0.94 | xh  | positive regulation of leukocyte activation                                                                               |
| GO:0045191 | 0.98  | -0.22 | -0.31 | 0.00 | 0.75 | 0.78 | xh  | regulation of isotype switching                                                                                           |
| GO:0045830 | 1.16  | 0.18  | -0.56 | 0.00 | 0.82 | 0.56 | xh  | positive regulation of isotype switching                                                                                  |
| GO:0045911 | 1.16  | 0.18  | -0.56 | 0.00 | 0.82 | 0.56 | xh  | positive regulation of DNA recombination                                                                                  |
| GO:0048291 | 1.33  | 0.44  | -0.61 | 0.00 | 0.62 | 0.56 | xh  | isotype switching to IgG isotypes                                                                                         |
| GO:0048302 | 1.33  | 0.44  | -0.61 | 0.00 | 0.62 | 0.56 | xh  | regulation of isotype switching to IgG isotypes                                                                           |
| GO:0050867 | 0.46  | -0.05 | 0.04  | 0.01 | 0.84 | 0.94 | xh  | positive regulation of cell activation                                                                                    |
| GO:0051054 | 0.73  | 0.50  | -0.54 | 0.02 | 0.12 | 0.23 | xh  | positive regulation of DNA metabolic process                                                                              |
| GO:0051251 | 0.45  | -0.02 | 0.01  | 0.01 | 0.92 | 0.99 | xh  | positive regulation of lymphocyte activation                                                                              |
| GO:0006968 | 0.47  | 0.16  | -0.10 | 0.00 | 0.42 | 0.78 | xh  | cellular defense response                                                                                                 |
| GO:0006935 | 0.46  | 0.18  | 0.01  | 0.00 | 0.24 | 0.99 | xh  | chemotaxis                                                                                                                |
| GO:0006954 | 0.49  | 0.00  | 0.09  | 0.00 | 0.99 | 0.41 | xh  | inflammatory response                                                                                                     |
| GO:0005996 | 0.33  | 0.00  | 0.05  | 0.00 | 1.00 | 0.81 | xh  | monosaccharide metabolic process                                                                                          |
| GO:0044262 | 0.22  | -0.07 | 0.03  | 0.00 | 0.47 | 0.84 | xh  | cellular carbohydrate metabolic process                                                                                   |
| GO:0015980 | 0.21  | -0.07 | 0.03  | 0.00 | 0.43 | 0.82 | xh  | energy derivation by oxidation of organic compounds                                                                       |
| GO:0019318 | 0.33  | -0.01 | 0.05  | 0.00 | 0.96 | 0.80 | xh  | hexose metabolic process                                                                                                  |
| GO:0006006 | 0.34  | -0.02 | 0.04  | 0.01 | 0.91 | 0.90 | xh  | glucose metabolic process                                                                                                 |
| GO:0030003 | 0.22  | -0.05 | 0.02  | 0.05 | 0.71 | 0.93 | xh  | cellular cation homeostasis                                                                                               |
| GO:0055065 | 0.27  | -0.08 | 0.03  | 0.01 | 0.53 | 0.91 | xh  | metal ion homeostasis                                                                                                     |
| GO:0055080 | 0.22  | -0.09 | 0.02  | 0.04 | 0.47 | 0.94 | xh  | cation homeostasis                                                                                                        |
| GO:0006875 | 0.27  | -0.08 | 0.03  | 0.01 | 0.53 | 0.91 | xh  | cellular metal ion homeostasis                                                                                            |

|            |       |       |       |      |      |      |    |                                                                                           |
|------------|-------|-------|-------|------|------|------|----|-------------------------------------------------------------------------------------------|
| GO:0030005 | 0.28  | -0.08 | 0.02  | 0.01 | 0.59 | 0.94 | xh | cellular di-, tri-valent inorganic cation homeostasis                                     |
| GO:0055066 | 0.28  | -0.08 | 0.02  | 0.01 | 0.59 | 0.94 | xh | di-, tri-valent inorganic cation homeostasis                                              |
| GO:0055074 | 0.29  | -0.09 | 0.03  | 0.02 | 0.57 | 0.90 | xh | calcium ion homeostasis                                                                   |
| GO:0006874 | 0.29  | -0.09 | 0.03  | 0.02 | 0.57 | 0.90 | xh | cellular calcium ion homeostasis                                                          |
| GO:0045214 | 1.16  | -0.69 | -0.11 | 0.02 | 0.26 | 0.95 | xh | sarcomere organization                                                                    |
| GO:0048646 | 0.28  | -0.00 | 0.00  | 0.01 | 0.97 | 0.99 | xh | anatomical structure formation                                                            |
| GO:0007160 | 0.35  | -0.28 | 0.11  | 0.03 | 0.05 | 0.56 | xh | cell-matrix adhesion                                                                      |
| GO:0051480 | 0.44  | -0.08 | 0.08  | 0.01 | 0.73 | 0.80 | xh | cytosolic calcium ion homeostasis                                                         |
| GO:0007204 | 0.45  | -0.04 | 0.07  | 0.01 | 0.85 | 0.83 | xh | elevation of cytosolic calcium ion concentration                                          |
| GO:0032103 | 0.73  | -0.47 | 0.08  | 0.03 | 0.17 | 0.90 | xh | positive regulation of response to external stimulus                                      |
| GO:0050920 | 1.14  | 0.12  | -0.13 | 0.04 | 0.91 | 0.94 | xh | regulation of chemotaxis                                                                  |
| GO:0006897 | 0.22  | -0.04 | -0.04 | 0.04 | 0.78 | 0.87 | xh | endocytosis                                                                               |
| GO:0010324 | 0.22  | -0.04 | -0.04 | 0.04 | 0.78 | 0.87 | xh | membrane invagination                                                                     |
| GO:0019935 | 0.32  | -0.05 | -0.16 | 0.01 | 0.83 | 0.53 | xh | cyclic-nucleotide-mediated signaling                                                      |
| GO:0007187 | 0.38  | -0.04 | -0.20 | 0.00 | 0.85 | 0.47 | xh | G-protein signaling, coupled to cyclic nucleotide second messenger                        |
| GO:0007188 | 0.34  | -0.17 | -0.18 | 0.03 | 0.37 | 0.60 | xh | G-protein signaling, coupled to cAMP nucleotide second messenger                          |
| GO:0002526 | 0.48  | -0.32 | -0.04 | 0.01 | 0.09 | 0.94 | xh | acute inflammatory response                                                               |
| GO:0015672 | 0.22  | 0.08  | -0.15 | 0.01 | 0.48 | 0.32 | xh | monovalent inorganic cation transport                                                     |
| GO:0006813 | 0.34  | -0.08 | -0.09 | 0.01 | 0.66 | 0.78 | xh | potassium ion transport                                                                   |
| GO:0051346 | 0.83  | -0.11 | 0.23  | 0.03 | 0.82 | 0.47 | xh | negative regulation of hydrolase activity                                                 |
| GO:0019882 | 0.78  | 0.01  | -0.08 | 0.00 | 0.97 | 0.83 | xh | antigen processing and presentation                                                       |
| GO:0048002 | 0.66  | 0.03  | -0.08 | 0.00 | 0.91 | 0.90 | xh | antigen processing and presentation of peptide antigen                                    |
| GO:0002474 | 0.58  | 0.03  | -0.05 | 0.01 | 0.91 | 0.94 | xh | antigen processing and presentation of peptide antigen via MHC class I                    |
| GO:0048514 | 0.23  | 0.02  | 0.00  | 0.04 | 0.91 | 1.00 | xh | blood vessel morphogenesis                                                                |
| GO:0001654 | 0.59  | 0.18  | -0.18 | 0.02 | 0.60 | 0.78 | xh | eye development                                                                           |
| GO:0046530 | 1.05  | 0.44  | -0.45 | 0.00 | 0.42 | 0.60 | xh | photoreceptor cell differentiation                                                        |
| GO:0048592 | 0.72  | 0.50  | -0.32 | 0.02 | 0.16 | 0.64 | xh | eye morphogenesis                                                                         |
| GO:0001754 | 1.08  | 0.47  | -0.46 | 0.00 | 0.40 | 0.59 | xh | eye photoreceptor cell differentiation                                                    |
| GO:0042461 | 1.05  | 0.44  | -0.45 | 0.00 | 0.42 | 0.60 | xh | photoreceptor cell development                                                            |
| GO:0042462 | 1.08  | 0.47  | -0.46 | 0.00 | 0.40 | 0.59 | xh | eye photoreceptor cell development                                                        |
| GO:0007586 | 0.44  | 0.02  | 0.11  | 0.00 | 0.92 | 0.53 | xh | digestion                                                                                 |
| GO:0002274 | 0.88  | 0.52  | -0.32 | 0.00 | 0.17 | 0.63 | xh | myeloid leukocyte activation                                                              |
| GO:0001525 | 0.33  | 0.03  | -0.00 | 0.00 | 0.85 | 0.99 | xh | angiogenesis                                                                              |
| GO:0050792 | 0.93  | -0.14 | 0.01  | 0.02 | 0.84 | 0.99 | xh | regulation of viral reproduction                                                          |
| GO:0045069 | 1.46  | 0.55  | -0.40 | 0.00 | 0.51 | 0.75 | xh | regulation of viral genome replication                                                    |
| GO:0007159 | 0.97  | 0.26  | -0.17 | 0.04 | 0.73 | 0.90 | xh | leukocyte adhesion                                                                        |
| GO:0007416 | 0.65  | -0.20 | -0.07 | 0.03 | 0.64 | 0.94 | xh | synaptogenesis                                                                            |
| GO:0045576 | 1.39  | 0.05  | -0.11 | 0.00 | 0.96 | 0.94 | xh | mast cell activation                                                                      |
| GO:0006007 | 0.54  | 0.12  | -0.02 | 0.00 | 0.66 | 0.99 | xh | glucose catabolic process                                                                 |
| GO:0016052 | 0.43  | 0.06  | 0.05  | 0.00 | 0.78 | 0.82 | xh | carbohydrate catabolic process                                                            |
| GO:0019320 | 0.53  | 0.13  | 0.01  | 0.00 | 0.55 | 0.99 | xh | hexose catabolic process                                                                  |
| GO:0044275 | 0.43  | 0.06  | 0.05  | 0.00 | 0.78 | 0.82 | xh | cellular carbohydrate catabolic process                                                   |
| GO:0046164 | 0.48  | 0.02  | 0.09  | 0.00 | 0.94 | 0.69 | xh | alcohol catabolic process                                                                 |
| GO:0046365 | 0.53  | 0.13  | 0.01  | 0.00 | 0.55 | 0.99 | xh | monosaccharide catabolic process                                                          |
| GO:0006096 | 0.64  | -0.02 | 0.05  | 0.00 | 0.95 | 0.90 | xh | glycolysis                                                                                |
| GO:0044259 | 0.83  | -0.34 | 0.06  | 0.02 | 0.42 | 0.94 | xh | multicellular organismal macromolecule metabolic process                                  |
| GO:0044236 | 0.86  | -0.48 | 0.11  | 0.00 | 0.12 | 0.81 | xh | multicellular organismal metabolic process                                                |
| GO:0044243 | 0.91  | -0.39 | 0.04  | 0.01 | 0.32 | 0.97 | xh | multicellular organismal catabolic process                                                |
| GO:0044256 | 0.83  | -0.34 | 0.06  | 0.02 | 0.42 | 0.94 | xh | protein digestion                                                                         |
| GO:0044266 | 0.83  | -0.34 | 0.06  | 0.02 | 0.42 | 0.94 | xh | multicellular organismal macromolecule catabolic process                                  |
| GO:0044268 | 0.83  | -0.34 | 0.06  | 0.02 | 0.42 | 0.94 | xh | multicellular organismal protein metabolic process                                        |
| GO:0044254 | 0.83  | -0.34 | 0.06  | 0.02 | 0.42 | 0.94 | xh | multicellular organismal protein catabolic process                                        |
| GO:0030574 | 0.83  | -0.34 | 0.06  | 0.02 | 0.42 | 0.94 | xh | collagen catabolic process                                                                |
| GO:0009617 | 0.54  | 0.10  | 0.10  | 0.00 | 0.70 | 0.69 | xh | response to bacterium                                                                     |
| GO:0042742 | 0.53  | 0.05  | 0.14  | 0.01 | 0.85 | 0.49 | xh | defense response to bacterium                                                             |
| GO:0043010 | 1.43  | -0.40 | 0.11  | 0.00 | 0.62 | 0.93 | xh | camera-type eye development                                                               |
| GO:0051606 | 0.64  | -0.10 | -0.18 | 0.00 | 0.78 | 0.73 | xh | detection of stimulus                                                                     |
| GO:0009581 | 0.92  | -0.16 | -0.22 | 0.00 | 0.73 | 0.78 | xh | detection of external stimulus                                                            |
| GO:0000270 | 0.90  | -0.02 | -0.05 | 0.00 | 0.97 | 0.97 | xh | peptidoglycan metabolic process                                                           |
| GO:0043542 | 1.13  | -0.10 | 0.29  | 0.01 | 0.86 | 0.48 | xh | endothelial cell migration                                                                |
| GO:0051208 | 1.53  | 0.85  | -0.52 | 0.00 | 0.22 | 0.60 | xh | sequestering of calcium ion                                                               |
| GO:0051238 | 1.24  | -0.59 | 0.18  | 0.00 | 0.18 | 0.72 | xh | sequestering of metal ion                                                                 |
| GO:0009306 | 0.52  | -0.18 | -0.02 | 0.02 | 0.53 | 0.99 | xh | protein secretion                                                                         |
| GO:0009582 | 0.77  | -0.24 | -0.31 | 0.00 | 0.56 | 0.66 | xh | detection of abiotic stimulus                                                             |
| GO:0050906 | 0.81  | -0.20 | -0.40 | 0.00 | 0.69 | 0.58 | xh | detection of stimulus involved in sensory perception                                      |
| GO:0009583 | 0.92  | -0.14 | -0.26 | 0.00 | 0.83 | 0.80 | xh | detection of light stimulus                                                               |
| GO:0009584 | 0.92  | -0.14 | -0.26 | 0.00 | 0.83 | 0.80 | xh | detection of visible light                                                                |
| GO:0050962 | 0.93  | -0.16 | -0.25 | 0.00 | 0.81 | 0.80 | xh | detection of light stimulus involved in sensory perception                                |
| GO:0007602 | 0.97  | -0.19 | -0.23 | 0.00 | 0.78 | 0.82 | xh | phototransduction                                                                         |
| GO:0050908 | 0.93  | -0.16 | -0.25 | 0.00 | 0.81 | 0.80 | xh | detection of light stimulus involved in visual perception                                 |
| GO:0002504 | 1.21  | -0.18 | -0.11 | 0.00 | 0.79 | 0.93 | xh | antigen processing and presentation of peptide or polysaccharide antigen via MHC class II |
| GO:0045045 | -0.24 | 0.13  | -0.01 | 0.00 | 0.16 | 0.99 | xl | establishment and/or maintenance of chromatin architecture                                |
| GO:0006325 | -0.16 | -0.05 | -0.04 | 0.04 | 0.63 | 0.81 | xl |                                                                                           |
| GO:0051276 | -0.15 | 0.06  | -0.00 | 0.03 | 0.48 | 0.99 | xl | chromosome organization and biogenesis                                                    |
| GO:0016568 | -0.35 | -0.01 | -0.09 | 0.00 | 0.98 | 0.65 | xl | chromatin modification                                                                    |
| GO:0007264 | -0.14 | 0.08  | 0.07  | 0.05 | 0.34 | 0.40 | xl | small GTPase mediated signal transduction                                                 |
| GO:0006631 | -0.25 | -0.12 | -0.06 | 0.01 | 0.39 | 0.80 | xl | fatty acid metabolic process                                                              |
| GO:0008202 | -0.22 | 0.11  | -0.01 | 0.03 | 0.37 | 0.97 | xl | steroid metabolic process                                                                 |
| GO:0030183 | -0.41 | 0.37  | 0.01  | 0.04 | 0.06 | 0.99 | xl | B cell differentiation                                                                    |
| GO:0045786 | -0.26 | -0.04 | 0.05  | 0.00 | 0.73 | 0.78 | xl | negative regulation of cell cycle                                                         |
| GO:0007179 | -0.38 | -0.37 | -0.32 | 0.05 | 0.12 | 0.39 | xl | transforming growth factor beta receptor signaling pathway                                |
| GO:0008610 | -0.24 | -0.06 | -0.09 | 0.00 | 0.66 | 0.58 | xl | lipid biosynthetic process                                                                |
| GO:0007050 | -0.35 | -0.16 | 0.02  | 0.01 | 0.39 | 0.98 | xl | cell cycle arrest                                                                         |
| GO:0048193 | -0.41 | 0.20  | 0.01  | 0.00 | 0.10 | 0.99 | xl | Golgi vesicle transport                                                                   |
| GO:0006473 | -0.76 | -0.49 | -0.44 | 0.00 | 0.15 | 0.26 | xl | protein amino acid acetylation                                                            |
| GO:0016569 | -0.54 | -0.19 | -0.37 | 0.00 | 0.55 | 0.23 | xl | covalent chromatin modification                                                           |
| GO:0016570 | -0.54 | -0.19 | -0.37 | 0.00 | 0.55 | 0.23 | xl | histone modification                                                                      |
| GO:0043543 | -0.67 | -0.44 | -0.32 | 0.00 | 0.14 | 0.47 | xl | protein amino acid acylation                                                              |
| GO:0032273 | -0.81 | 0.66  | -0.04 | 0.03 | 0.07 | 0.97 | xl | positive regulation of protein polymerization                                             |
| GO:0051495 | -0.69 | 0.50  | -0.00 | 0.02 | 0.13 | 0.99 | xl | positive regulation of cytoskeleton organization and biogenesis                           |
| GO:0030518 | -0.35 | 0.05  | -0.02 | 0.03 | 0.84 | 0.98 | xl | steroid hormone receptor signaling pathway                                                |
| GO:0030522 | -0.34 | 0.03  | -0.02 | 0.03 | 0.89 | 0.99 | xl | intracellular receptor-mediated signaling pathway                                         |
| GO:0006694 | -0.39 | 0.16  | -0.11 | 0.00 | 0.42 | 0.77 | xl | steroid biosynthetic process                                                              |

|            |       |       |       |      |      |      |    |                                                                      |
|------------|-------|-------|-------|------|------|------|----|----------------------------------------------------------------------|
| GO:0045682 | -0.78 | 0.07  | 0.03  | 0.02 | 0.91 | 0.99 | xl | regulation of epidermis development                                  |
| GO:0006505 | -0.65 | -0.39 | -0.26 | 0.02 | 0.39 | 0.73 | xl | GPI anchor metabolic process                                         |
| GO:0006506 | -0.65 | -0.39 | -0.26 | 0.02 | 0.39 | 0.73 | xl | GPI anchor biosynthetic process                                      |
| GO:0030384 | -0.44 | -0.13 | -0.14 | 0.03 | 0.73 | 0.80 | xl | phosphoinositide metabolic process                                   |
| GO:0000245 | -0.42 | 0.26  | -0.22 | 0.03 | 0.31 | 0.63 | xl | spliceosome assembly                                                 |
| GO:0006376 | -0.66 | 0.34  | -0.20 | 0.01 | 0.38 | 0.78 | xl | mRNA splice site selection                                           |
| GO:0006383 | -0.45 | 0.18  | -0.09 | 0.05 | 0.59 | 0.88 | xl | transcription from RNA polymerase III promoter                       |
| GO:0009081 | -0.82 | 0.47  | -0.10 | 0.00 | 0.26 | 0.91 | xl | branched chain family amino acid metabolic process                   |
| GO:0016126 | -0.69 | 0.42  | -0.17 | 0.00 | 0.08 | 0.72 | xl | sterol biosynthetic process                                          |
| GO:0006695 | -0.70 | 0.08  | -0.37 | 0.00 | 0.85 | 0.47 | xl | cholesterol biosynthetic process                                     |
| GO:0048515 | -0.51 | -0.02 | -0.17 | 0.03 | 0.97 | 0.80 | xl | spermatid differentiation                                            |
| GO:0015669 | -0.89 | -0.63 | -0.50 | 0.00 | 0.19 | 0.45 | xl | gas transport                                                        |
| GO:0015671 | -0.89 | -0.63 | -0.50 | 0.00 | 0.19 | 0.45 | xl | oxygen transport                                                     |
| GO:0010212 | -0.79 | 0.14  | -0.32 | 0.03 | 0.85 | 0.78 | xl | response to ionizing radiation                                       |
| GO:0007031 | -0.59 | -0.13 | -0.19 | 0.01 | 0.80 | 0.79 | xl | peroxisome organization and biogenesis                               |
| GO:0001542 | -0.79 | 0.43  | -0.26 | 0.05 | 0.51 | 0.81 | xl | ovulation from ovarian follicle                                      |
| GO:0030728 | -0.84 | 0.54  | -0.30 | 0.03 | 0.35 | 0.78 | xl | ovulation                                                            |
| GO:0006414 | -0.69 | 0.37  | -0.18 | 0.00 | 0.29 | 0.78 | xl | translational elongation                                             |
| GO:0006163 | 0.18  | 0.34  | -0.22 | 0.35 | 0.04 | 0.48 | yh | purine nucleotide metabolic process                                  |
| GO:0006144 | 0.93  | 0.98  | -0.50 | 0.10 | 0.00 | 0.47 | yh | purine base metabolic process                                        |
| GO:0009259 | 0.11  | 0.34  | -0.17 | 0.58 | 0.03 | 0.59 | yh | ribonucleotide metabolic process                                     |
| GO:0045944 | -0.19 | 0.25  | -0.09 | 0.09 | 0.01 | 0.66 | yh | positive regulation of transcription from RNA polymerase II promoter |
| GO:0006520 | 0.03  | 0.20  | 0.01  | 0.81 | 0.02 | 0.97 | yh | amino acid metabolic process                                         |
| GO:0032268 | -0.10 | 0.21  | 0.10  | 0.29 | 0.00 | 0.06 | yh | regulation of cellular protein metabolic process                     |
| GO:0032270 | 0.18  | 0.32  | -0.09 | 0.31 | 0.04 | 0.78 | yh | positive regulation of cellular protein metabolic process            |
| GO:0051246 | -0.10 | 0.21  | 0.09  | 0.26 | 0.00 | 0.13 | yh | regulation of protein metabolic process                              |
| GO:0051247 | 0.16  | 0.30  | -0.09 | 0.37 | 0.05 | 0.79 | yh | positive regulation of protein metabolic process                     |
| GO:0009889 | -0.19 | 0.21  | 0.01  | 0.06 | 0.03 | 0.97 | yh | regulation of biosynthetic process                                   |
| GO:0031326 | -0.19 | 0.21  | 0.01  | 0.06 | 0.03 | 0.97 | yh | regulation of cellular biosynthetic process                          |
| GO:0001775 | 0.16  | 0.25  | -0.05 | 0.13 | 0.01 | 0.81 | yh | cell activation                                                      |
| GO:0045321 | 0.15  | 0.26  | -0.04 | 0.19 | 0.01 | 0.84 | yh | leukocyte activation                                                 |
| GO:0046649 | 0.13  | 0.25  | -0.03 | 0.28 | 0.01 | 0.93 | yh | lymphocyte activation                                                |
| GO:0050854 | 0.48  | 0.74  | -0.34 | 0.38 | 0.04 | 0.67 | yh | regulation of antigen receptor-mediated signaling pathway            |
| GO:0050856 | 0.48  | 0.74  | -0.34 | 0.38 | 0.04 | 0.67 | yh | regulation of T cell receptor signaling pathway                      |
| GO:0051094 | -0.06 | 0.21  | 0.03  | 0.49 | 0.00 | 0.79 | yh | positive regulation of developmental process                         |
| GO:0043068 | -0.07 | 0.27  | 0.04  | 0.52 | 0.00 | 0.80 | yh | positive regulation of programmed cell death                         |
| GO:0006417 | -0.21 | 0.29  | 0.02  | 0.05 | 0.00 | 0.93 | yh | regulation of translation                                            |
| GO:0042098 | 0.02  | 0.43  | -0.07 | 0.95 | 0.05 | 0.90 | yh | T cell proliferation                                                 |
| GO:0001816 | 0.13  | 0.32  | -0.10 | 0.47 | 0.03 | 0.75 | yh | cytokine production                                                  |
| GO:0042089 | 0.06  | 0.36  | -0.13 | 0.82 | 0.04 | 0.75 | yh | cytokine biosynthetic process                                        |
| GO:0042107 | 0.07  | 0.35  | -0.13 | 0.79 | 0.05 | 0.75 | yh | cytokine metabolic process                                           |
| GO:0043065 | -0.07 | 0.27  | 0.04  | 0.51 | 0.00 | 0.80 | yh | positive regulation of apoptosis                                     |
| GO:0007243 | 0.09  | 0.16  | 0.01  | 0.28 | 0.03 | 0.95 | yh | protein kinase cascade                                               |
| GO:0051052 | 0.07  | 0.41  | -0.16 | 0.76 | 0.01 | 0.60 | yh | regulation of DNA metabolic process                                  |
| GO:0043388 | -0.21 | 0.77  | -0.16 | 0.59 | 0.00 | 0.73 | yh | positive regulation of DNA binding                                   |
| GO:0051090 | -0.28 | 0.49  | -0.06 | 0.24 | 0.01 | 0.90 | yh | regulation of transcription factor activity                          |
| GO:0051091 | -0.23 | 0.84  | -0.16 | 0.58 | 0.00 | 0.75 | yh | positive regulation of transcription factor activity                 |
| GO:0051099 | -0.25 | 0.73  | -0.14 | 0.48 | 0.00 | 0.78 | yh | positive regulation of binding                                       |
| GO:0051101 | -0.28 | 0.45  | -0.08 | 0.18 | 0.01 | 0.82 | yh | regulation of DNA binding                                            |
| GO:0007249 | 0.15  | 0.36  | -0.05 | 0.30 | 0.00 | 0.82 | yh | I-kappaB kinase/NF-kappaB cascade                                    |
| GO:0006282 | -0.43 | 0.93  | -0.21 | 0.47 | 0.00 | 0.78 | yh | regulation of DNA repair                                             |
| GO:0051092 | 0.01  | 0.86  | -0.23 | 0.99 | 0.00 | 0.67 | yh | positive regulation of NF-kappaB transcription factor activity       |
| GO:0030099 | -0.10 | 0.26  | 0.01  | 0.56 | 0.05 | 0.97 | yh | myeloid cell differentiation                                         |
| GO:0030218 | -0.40 | 0.42  | -0.02 | 0.06 | 0.04 | 0.97 | yh | erythrocyte differentiation                                          |
| GO:0034101 | -0.40 | 0.42  | -0.02 | 0.06 | 0.04 | 0.97 | yh | erythrocyte homeostasis                                              |
| GO:0048534 | -0.07 | 0.18  | 0.03  | 0.59 | 0.05 | 0.84 | yh | hemopoietic or lymphoid organ development                            |
| GO:0048872 | -0.28 | 0.46  | -0.06 | 0.17 | 0.01 | 0.88 | yh | homeostasis of number of cells                                       |
| GO:0043069 | -0.04 | 0.19  | 0.05  | 0.76 | 0.02 | 0.72 | yh | negative regulation of programmed cell death                         |
| GO:0007260 | 0.34  | 0.78  | -0.15 | 0.48 | 0.01 | 0.80 | yh | tyrosine phosphorylation of STAT protein                             |
| GO:0043066 | -0.04 | 0.20  | 0.05  | 0.73 | 0.01 | 0.73 | yh | negative regulation of apoptosis                                     |
| GO:0017038 | -0.25 | 0.41  | -0.02 | 0.05 | 0.00 | 0.95 | yh | protein import                                                       |
| GO:0051170 | -0.25 | 0.39  | -0.03 | 0.06 | 0.00 | 0.94 | yh | nuclear import                                                       |
| GO:0009057 | -0.03 | 0.15  | 0.04  | 0.74 | 0.03 | 0.75 | yh | macromolecule catabolic process                                      |
| GO:0022404 | -0.38 | 0.65  | -0.28 | 0.31 | 0.02 | 0.63 | yh | molting cycle process                                                |
| GO:0042303 | -0.32 | 0.65  | -0.27 | 0.42 | 0.01 | 0.63 | yh | molting cycle                                                        |
| GO:0042633 | -0.32 | 0.65  | -0.27 | 0.42 | 0.01 | 0.63 | yh | hair cycle                                                           |
| GO:0007005 | 0.10  | 0.32  | 0.02  | 0.65 | 0.03 | 0.97 | yh | mitochondrion organization and biogenesis                            |
| GO:0008632 | 0.17  | 0.31  | 0.04  | 0.37 | 0.05 | 0.89 | yh | apoptotic program                                                    |
| GO:0022405 | -0.38 | 0.65  | -0.28 | 0.31 | 0.02 | 0.63 | yh | hair cycle process                                                   |
| GO:0001942 | -0.38 | 0.65  | -0.28 | 0.31 | 0.02 | 0.63 | yh | hair follicle development                                            |
| GO:0006916 | -0.07 | 0.22  | 0.06  | 0.52 | 0.01 | 0.67 | yh | anti-apoptosis                                                       |
| GO:0065002 | -0.23 | 0.53  | -0.01 | 0.44 | 0.01 | 0.99 | yh | intracellular protein transport across a membrane                    |
| GO:0000060 | -0.23 | 0.53  | -0.01 | 0.44 | 0.01 | 0.99 | yh | protein import into nucleus, translocation                           |
| GO:0009615 | 0.17  | 0.34  | 0.07  | 0.35 | 0.02 | 0.78 | yh | response to virus                                                    |
| GO:0006405 | -0.20 | 0.44  | -0.12 | 0.47 | 0.04 | 0.80 | yh | RNA export from nucleus                                              |
| GO:0051168 | -0.18 | 0.51  | -0.13 | 0.40 | 0.00 | 0.72 | yh | nuclear export                                                       |
| GO:0012502 | -0.05 | 0.26  | 0.04  | 0.70 | 0.00 | 0.81 | yh | induction of programmed cell death                                   |
| GO:0051325 | -0.23 | 0.38  | 0.10  | 0.13 | 0.00 | 0.50 | yh | interphase                                                           |
| GO:0051329 | -0.23 | 0.39  | 0.10  | 0.12 | 0.00 | 0.48 | yh | interphase of mitotic cell cycle                                     |
| GO:0006917 | -0.05 | 0.26  | 0.04  | 0.68 | 0.00 | 0.81 | yh | induction of apoptosis                                               |
| GO:0042254 | 0.09  | 0.34  | 0.00  | 0.71 | 0.04 | 0.99 | yh | ribosome biogenesis                                                  |
| GO:0006611 | -0.17 | 0.60  | -0.15 | 0.69 | 0.02 | 0.80 | yh | protein export from nucleus                                          |
| GO:0006260 | -0.13 | 0.28  | 0.06  | 0.22 | 0.00 | 0.63 | yh | DNA replication                                                      |
| GO:0031570 | -0.21 | 0.59  | 0.01  | 0.37 | 0.00 | 0.99 | yh | DNA integrity checkpoint                                             |
| GO:0042770 | -0.10 | 0.54  | 0.03  | 0.66 | 0.00 | 0.93 | yh | DNA damage response, signal transduction                             |
| GO:0000077 | -0.26 | 0.57  | 0.02  | 0.25 | 0.00 | 0.97 | yh | DNA damage checkpoint                                                |
| GO:0009314 | -0.11 | 0.30  | 0.10  | 0.52 | 0.03 | 0.50 | yh | response to radiation                                                |
| GO:0007126 | -0.12 | 0.34  | 0.01  | 0.56 | 0.03 | 0.99 | yh | meiosis                                                              |
| GO:0051321 | -0.11 | 0.35  | 0.01  | 0.59 | 0.02 | 0.99 | yh | meiotic cell cycle                                                   |
| GO:0051327 | -0.12 | 0.34  | 0.01  | 0.56 | 0.03 | 0.99 | yh | M phase of meiotic cell cycle                                        |
| GO:0051262 | -0.43 | 0.55  | -0.06 | 0.13 | 0.02 | 0.93 | yh | protein tetramerization                                              |
| GO:0006261 | -0.04 | 0.29  | -0.02 | 0.86 | 0.03 | 0.95 | yh | DNA-dependent DNA replication                                        |
| GO:0046466 | -0.39 | 0.53  | 0.14  | 0.21 | 0.02 | 0.60 | yh | membrane lipid catabolic process                                     |
| GO:0007164 | -0.61 | 0.84  | -0.30 | 0.26 | 0.02 | 0.71 | yh | establishment of tissue polarity                                     |
| GO:0000226 | -0.12 | 0.29  | 0.12  | 0.48 | 0.03 | 0.38 | yh | microtubule cytoskeleton organization and biogenesis                 |
| GO:0007017 | -0.02 | 0.23  | 0.11  | 0.90 | 0.01 | 0.15 | yh | microtubule-based process                                            |
| GO:0032271 | -0.46 | 0.58  | -0.03 | 0.15 | 0.03 | 0.98 | yh | regulation of protein polymerization                                 |
| GO:0007346 | -0.21 | 0.36  | 0.10  | 0.22 | 0.01 | 0.49 | yh | regulation of mitotic cell cycle                                     |
| GO:0007067 | -0.11 | 0.41  | 0.12  | 0.32 | 0.00 | 0.09 | yh | mitosis                                                              |
| GO:0007088 | -0.08 | 0.47  | 0.07  | 0.76 | 0.00 | 0.78 | yh | regulation of mitosis                                                |



|            |       |       |       |      |      |      |    |                                                                  |
|------------|-------|-------|-------|------|------|------|----|------------------------------------------------------------------|
| GO:0006767 | -0.08 | 0.45  | -0.10 | 0.81 | 0.03 | 0.82 | yh | water-soluble vitamin metabolic process                          |
| GO:0006769 | 0.11  | 0.59  | -0.14 | 0.81 | 0.05 | 0.82 | yh | nicotinamide metabolic process                                   |
| GO:0006691 | -0.30 | 0.62  | -0.19 | 0.48 | 0.04 | 0.80 | yh | leukotriene metabolic process                                    |
| GO:0043449 | -0.30 | 0.62  | -0.19 | 0.48 | 0.04 | 0.80 | yh | alkene metabolic process                                         |
| GO:0043450 | -0.39 | 0.65  | -0.17 | 0.36 | 0.04 | 0.81 | yh | alkene biosynthetic process                                      |
| GO:0019370 | -0.39 | 0.65  | -0.17 | 0.36 | 0.04 | 0.81 | yh | leukotriene biosynthetic process                                 |
| GO:0046034 | 0.04  | 0.43  | -0.29 | 0.88 | 0.04 | 0.48 | yh | ATP metabolic process                                            |
| GO:0044265 | -0.08 | 0.18  | 0.07  | 0.40 | 0.02 | 0.48 | yh | cellular macromolecule catabolic process                         |
| GO:0045840 | 0.96  | 1.18  | -0.44 | 0.23 | 0.00 | 0.56 | yh | positive regulation of mitosis                                   |
| GO:0001906 | 0.23  | 0.67  | -0.15 | 0.64 | 0.03 | 0.82 | yh | cell killing                                                     |
| GO:0001909 | 0.33  | 0.68  | -0.15 | 0.51 | 0.05 | 0.82 | yh | leukocyte mediated cytotoxicity                                  |
| GO:0002228 | 0.33  | 0.68  | -0.15 | 0.51 | 0.05 | 0.82 | yh | natural killer cell mediated immunity                            |
| GO:0042267 | 0.33  | 0.68  | -0.15 | 0.51 | 0.05 | 0.82 | yh | natural killer cell mediated cytotoxicity                        |
| GO:0006984 | -0.50 | 0.55  | 0.07  | 0.14 | 0.05 | 0.90 | yh | ER-nuclear signaling pathway                                     |
| GO:0045639 | -0.27 | 0.53  | -0.27 | 0.41 | 0.03 | 0.60 | yh | positive regulation of myeloid cell differentiation              |
| GO:0030833 | -0.47 | 0.71  | -0.10 | 0.23 | 0.01 | 0.89 | yh | regulation of actin filament polymerization                      |
| GO:0006818 | -0.00 | 0.43  | -0.17 | 1.00 | 0.01 | 0.61 | yh | hydrogen transport                                               |
| GO:0015992 | 0.02  | 0.36  | -0.16 | 0.94 | 0.04 | 0.67 | yh | proton transport                                                 |
| GO:0006275 | 0.04  | 0.50  | -0.19 | 0.92 | 0.05 | 0.75 | yh | regulation of DNA replication                                    |
| GO:0045648 | -0.61 | 1.06  | -0.29 | 0.25 | 0.00 | 0.60 | yh | positive regulation of erythrocyte differentiation               |
| GO:0006270 | -0.04 | 0.56  | -0.04 | 0.91 | 0.01 | 0.94 | yh | DNA replication initiation                                       |
| GO:0002456 | -0.08 | 0.79  | -0.13 | 0.91 | 0.01 | 0.85 | yh | T cell mediated immunity                                         |
| GO:0051648 | -0.05 | 0.52  | 0.01  | 0.91 | 0.05 | 0.99 | yh | vesicle localization                                             |
| GO:0051650 | -0.07 | 0.53  | 0.02  | 0.87 | 0.05 | 0.99 | yh | establishment of vesicle localization                            |
| GO:0048730 | -0.38 | 0.46  | 0.13  | 0.08 | 0.01 | 0.51 | yh | epidermis morphogenesis                                          |
| GO:0009411 | -0.36 | 0.62  | 0.13  | 0.19 | 0.00 | 0.61 | yh | response to UV                                                   |
| GO:0048284 | -0.20 | 0.72  | -0.11 | 0.77 | 0.05 | 0.91 | yh | organelle fusion                                                 |
| GO:0008634 | -0.55 | 0.82  | -0.11 | 0.24 | 0.01 | 0.88 | yh | negative regulation of survival gene product expression          |
| GO:0008053 | -0.34 | 0.76  | -0.07 | 0.59 | 0.04 | 0.94 | yh | mitochondrial fusion                                             |
| GO:0006739 | -0.02 | 0.67  | -0.20 | 0.99 | 0.03 | 0.79 | yh | NADP metabolic process                                           |
| GO:0001819 | 0.33  | 0.65  | -0.35 | 0.47 | 0.04 | 0.60 | yh | positive regulation of cytokine production                       |
| GO:0000086 | -0.09 | 0.61  | 0.01  | 0.85 | 0.03 | 0.99 | yh | G2/M transition of mitotic cell cycle                            |
| GO:0007059 | -0.16 | 0.47  | 0.04  | 0.52 | 0.01 | 0.93 | yh | chromosome segregation                                           |
| GO:0031069 | -0.27 | 0.89  | -0.26 | 0.73 | 0.00 | 0.77 | yh | hair follicle morphogenesis                                      |
| GO:0006302 | -0.24 | 0.52  | -0.11 | 0.37 | 0.01 | 0.81 | yh | double-strand break repair                                       |
| GO:0007032 | -0.40 | 1.16  | -0.33 | 0.56 | 0.00 | 0.54 | yh | endosome organization and biogenesis                             |
| GO:0007051 | 0.33  | 0.55  | 0.04  | 0.37 | 0.05 | 0.95 | yh | spindle organization and biogenesis                              |
| GO:0032635 | 0.37  | 0.97  | -0.56 | 0.65 | 0.00 | 0.39 | yh | interleukin-6 production                                         |
| GO:0042226 | 0.37  | 0.97  | -0.56 | 0.65 | 0.00 | 0.39 | yh | interleukin-6 biosynthetic process                               |
| GO:0008593 | -0.69 | 0.82  | -0.15 | 0.06 | 0.00 | 0.80 | yh | regulation of Notch signaling pathway                            |
| GO:0030330 | 0.27  | 0.62  | -0.07 | 0.52 | 0.03 | 0.93 | yh | DNA damage response, signal transduction by p53 class mediator   |
| GO:0030968 | -0.61 | 0.72  | 0.01  | 0.10 | 0.01 | 0.99 | yh | endoplasmic reticulum unfolded protein response                  |
| GO:0046479 | 0.43  | 0.91  | -0.15 | 0.60 | 0.03 | 0.87 | yh | glycosphingolipid catabolic process                              |
| GO:0006829 | 0.02  | 0.78  | -0.36 | 0.98 | 0.04 | 0.71 | yh | zinc ion transport                                               |
| GO:0007020 | -0.76 | 0.75  | -0.22 | 0.06 | 0.04 | 0.78 | yh | microtubule nucleation                                           |
| GO:0001501 | 0.12  | -0.19 | 0.01  | 0.25 | 0.04 | 0.99 | yl | skeletal development                                             |
| GO:0003012 | 0.05  | -0.28 | -0.10 | 0.72 | 0.01 | 0.67 | yl | muscle system process                                            |
| GO:0006936 | 0.05  | -0.28 | -0.10 | 0.72 | 0.01 | 0.67 | yl | muscle contraction                                               |
| GO:0019226 | 0.13  | -0.25 | -0.14 | 0.14 | 0.00 | 0.24 | yl | transmission of nerve impulse                                    |
| GO:0006939 | 0.11  | -0.49 | -0.10 | 0.74 | 0.04 | 0.85 | yl | smooth muscle contraction                                        |
| GO:0007417 | -0.09 | -0.22 | 0.03  | 0.44 | 0.02 | 0.90 | yl | central nervous system development                               |
| GO:0022008 | 0.11  | -0.30 | 0.02  | 0.27 | 0.00 | 0.90 | yl | neurogenesis                                                     |
| GO:0048699 | 0.15  | -0.32 | 0.02  | 0.12 | 0.00 | 0.93 | yl | generation of neurons                                            |
| GO:0007420 | 0.01  | -0.25 | -0.02 | 0.97 | 0.05 | 0.96 | yl | brain development                                                |
| GO:0030900 | -0.02 | -0.56 | -0.10 | 0.95 | 0.01 | 0.82 | yl | forebrain development                                            |
| GO:0008285 | -0.05 | -0.19 | 0.03  | 0.70 | 0.04 | 0.87 | yl | negative regulation of cell proliferation                        |
| GO:0021700 | 0.09  | -0.32 | -0.04 | 0.66 | 0.05 | 0.93 | yl | developmental maturation                                         |
| GO:0032990 | 0.13  | -0.20 | -0.01 | 0.24 | 0.05 | 0.99 | yl | cell part morphogenesis                                          |
| GO:0030030 | 0.13  | -0.20 | -0.01 | 0.24 | 0.05 | 0.99 | yl | cell projection organization and biogenesis                      |
| GO:0031175 | 0.15  | -0.24 | 0.03  | 0.28 | 0.03 | 0.93 | yl | neurite development                                              |
| GO:0048666 | 0.18  | -0.26 | 0.01  | 0.13 | 0.01 | 0.99 | yl | neuron development                                               |
| GO:0048858 | 0.13  | -0.20 | -0.01 | 0.24 | 0.05 | 0.99 | yl | cell projection morphogenesis                                    |
| GO:0007517 | 0.03  | -0.33 | 0.00  | 0.84 | 0.00 | 0.99 | yl | muscle development                                               |
| GO:0014706 | 0.01  | -0.30 | -0.02 | 0.95 | 0.03 | 0.97 | yl | striated muscle development                                      |
| GO:0008361 | -0.04 | -0.25 | 0.02  | 0.78 | 0.02 | 0.95 | yl | regulation of cell size                                          |
| GO:0040007 | -0.10 | -0.24 | -0.05 | 0.34 | 0.01 | 0.81 | yl | growth                                                           |
| GO:0016049 | -0.02 | -0.28 | 0.02  | 0.88 | 0.01 | 0.94 | yl | cell growth                                                      |
| GO:0007519 | 0.03  | -0.29 | -0.03 | 0.90 | 0.05 | 0.94 | yl | skeletal muscle development                                      |
| GO:0000271 | 0.20  | -0.59 | -0.11 | 0.63 | 0.04 | 0.90 | yl | polysaccharide biosynthetic process                              |
| GO:0033692 | 0.20  | -0.59 | -0.11 | 0.63 | 0.04 | 0.90 | yl | cellular polysaccharide biosynthetic process                     |
| GO:0007268 | 0.14  | -0.26 | -0.18 | 0.12 | 0.00 | 0.13 | yl | synaptic transmission                                            |
| GO:0009566 | 0.06  | -0.48 | -0.30 | 0.82 | 0.03 | 0.51 | yl | fertilization                                                    |
| GO:0007338 | 0.06  | -0.48 | -0.29 | 0.82 | 0.03 | 0.53 | yl | single fertilization                                             |
| GO:0048741 | 0.23  | -0.44 | -0.04 | 0.30 | 0.01 | 0.95 | yl | skeletal muscle fiber development                                |
| GO:0048747 | 0.23  | -0.44 | -0.04 | 0.30 | 0.01 | 0.95 | yl | muscle fiber development                                         |
| GO:0030239 | 0.74  | -0.95 | 0.08  | 0.06 | 0.00 | 0.90 | yl | myofibril assembly                                               |
| GO:0045445 | 0.38  | -0.50 | 0.01  | 0.15 | 0.02 | 0.99 | yl | myoblast differentiation                                         |
| GO:0051146 | 0.37  | -0.69 | 0.01  | 0.35 | 0.02 | 0.99 | yl | striated muscle cell differentiation                             |
| GO:0055001 | 0.74  | -0.95 | 0.08  | 0.06 | 0.00 | 0.90 | yl | muscle cell development                                          |
| GO:0055002 | 0.74  | -0.95 | 0.08  | 0.06 | 0.00 | 0.90 | yl | striated muscle cell development                                 |
| GO:0040008 | 0.02  | -0.30 | -0.01 | 0.88 | 0.00 | 0.97 | yl | regulation of growth                                             |
| GO:0035295 | 0.19  | -0.24 | 0.06  | 0.18 | 0.04 | 0.78 | yl | tube development                                                 |
| GO:0006022 | 0.18  | -0.61 | -0.15 | 0.52 | 0.00 | 0.77 | yl | aminoglycan metabolic process                                    |
| GO:0030203 | 0.16  | -0.58 | -0.14 | 0.56 | 0.00 | 0.78 | yl | glycosaminoglycan metabolic process                              |
| GO:0001558 | 0.07  | -0.29 | 0.01  | 0.70 | 0.01 | 0.98 | yl | regulation of cell growth                                        |
| GO:0003013 | 0.17  | -0.39 | -0.06 | 0.18 | 0.00 | 0.81 | yl | circulatory system process                                       |
| GO:0008015 | 0.17  | -0.39 | -0.06 | 0.18 | 0.00 | 0.81 | yl | blood circulation                                                |
| GO:0002541 | 0.50  | -0.58 | -0.07 | 0.08 | 0.01 | 0.93 | yl | activation of plasma proteins during acute inflammatory response |
| GO:0006956 | 0.50  | -0.58 | -0.07 | 0.08 | 0.01 | 0.93 | yl | complement activation                                            |
| GO:0006575 | 0.27  | -0.30 | 0.10  | 0.13 | 0.04 | 0.63 | yl | amino acid derivative metabolic process                          |
| GO:0018958 | 0.19  | -0.63 | -0.25 | 0.58 | 0.01 | 0.68 | yl | phenol metabolic process                                         |
| GO:0003018 | 0.29  | -0.49 | -0.06 | 0.34 | 0.05 | 0.94 | yl | vascular process in circulatory system                           |
| GO:0019229 | 0.59  | -1.12 | -0.14 | 0.36 | 0.00 | 0.90 | yl | regulation of vasoconstriction                                   |
| GO:0035150 | 0.32  | -0.50 | -0.05 | 0.30 | 0.04 | 0.95 | yl | regulation of tube size                                          |
| GO:0042310 | 0.51  | -0.80 | -0.10 | 0.27 | 0.01 | 0.93 | yl | vasoconstriction                                                 |
| GO:0050880 | 0.32  | -0.50 | -0.05 | 0.30 | 0.04 | 0.95 | yl | regulation of blood vessel size                                  |
| GO:0006584 | 0.21  | -0.65 | -0.24 | 0.54 | 0.01 | 0.71 | yl | catecholamine metabolic process                                  |
| GO:0019216 | 0.48  | -0.63 | 0.08  | 0.16 | 0.02 | 0.89 | yl | regulation of lipid metabolic process                            |
| GO:0030111 | -0.12 | -0.56 | 0.06  | 0.73 | 0.02 | 0.90 | yl | regulation of Wnt receptor signaling pathway                     |
| GO:0016358 | 0.53  | -0.52 | -0.05 | 0.07 | 0.05 | 0.96 | yl | dendrite development                                             |
| GO:0006721 | -0.56 | -0.93 | -0.34 | 0.25 | 0.02 | 0.67 | yl | terpenoid metabolic process                                      |
| GO:0016101 | -0.38 | -0.98 | -0.28 | 0.52 | 0.02 | 0.78 | yl | diterpenoid metabolic process                                    |
| GO:0001523 | -0.38 | -0.98 | -0.28 | 0.52 | 0.02 | 0.78 | yl | retinoid metabolic process                                       |
| GO:0006778 | -0.02 | -0.92 | -0.46 | 0.99 | 0.00 | 0.46 | yl | porphyrin metabolic process                                      |
| GO:0033013 | -0.02 | -0.92 | -0.46 | 0.99 | 0.00 | 0.46 | yl | tetrapyrrole metabolic process                                   |
| GO:0006779 | -0.06 | -0.71 | -0.27 | 0.93 | 0.03 | 0.75 | yl | porphyrin biosynthetic process                                   |

|            |       |       |       |      |      |      |        |                                                       |
|------------|-------|-------|-------|------|------|------|--------|-------------------------------------------------------|
| GO:0033014 | -0.06 | -0.71 | -0.27 | 0.93 | 0.03 | 0.75 | yl     | tetrapyrrole biosynthetic process                     |
| GO:0042168 | 0.08  | -0.93 | -0.43 | 0.87 | 0.00 | 0.51 | yl     | heme metabolic process                                |
| GO:0006783 | 0.04  | -0.71 | -0.23 | 0.93 | 0.04 | 0.80 | yl     | heme biosynthetic process                             |
| GO:0006937 | -0.06 | -0.66 | -0.11 | 0.89 | 0.01 | 0.84 | yl     | regulation of muscle contraction                      |
| GO:0001936 | -0.08 | -0.95 | -0.23 | 0.92 | 0.02 | 0.81 | yl     | regulation of endothelial cell proliferation          |
| GO:0006662 | 0.32  | -0.77 | -0.12 | 0.50 | 0.01 | 0.90 | yl     | glycerol ether metabolic process                      |
| GO:0009612 | 0.49  | -0.87 | -0.41 | 0.45 | 0.05 | 0.75 | yl     | response to mechanical stimulus                       |
| GO:0042311 | 0.74  | -0.80 | 0.10  | 0.08 | 0.01 | 0.88 | yl     | vasodilation                                          |
| GO:0006638 | 0.38  | -0.87 | -0.21 | 0.47 | 0.01 | 0.82 | yl     | neutral lipid metabolic process                       |
| GO:0006639 | 0.38  | -0.87 | -0.21 | 0.47 | 0.01 | 0.82 | yl     | acylglycerol metabolic process                        |
| GO:0046486 | 0.37  | -0.90 | -0.12 | 0.46 | 0.00 | 0.90 | yl     | glycerolipid metabolic process                        |
| GO:0030178 | 0.34  | -0.90 | 0.08  | 0.44 | 0.00 | 0.90 | yl     | negative regulation of Wnt receptor signaling pathway |
| GO:0046928 | 0.11  | -0.89 | -0.17 | 0.87 | 0.02 | 0.86 | yl     | regulation of neurotransmitter secretion              |
| GO:0048168 | -0.46 | -0.97 | -0.20 | 0.43 | 0.02 | 0.82 | yl     | regulation of neuronal synaptic plasticity            |
| GO:0007398 | -0.27 | 0.38  | 0.13  | 0.01 | 0.00 | 0.04 | no_rel | ectoderm development                                  |
| GO:0000278 | -0.17 | 0.36  | 0.12  | 0.03 | 0.00 | 0.00 | no_rel | mitotic cell cycle                                    |

Table 1: LOR: log odds ratio; p: adjusted p-value FDR

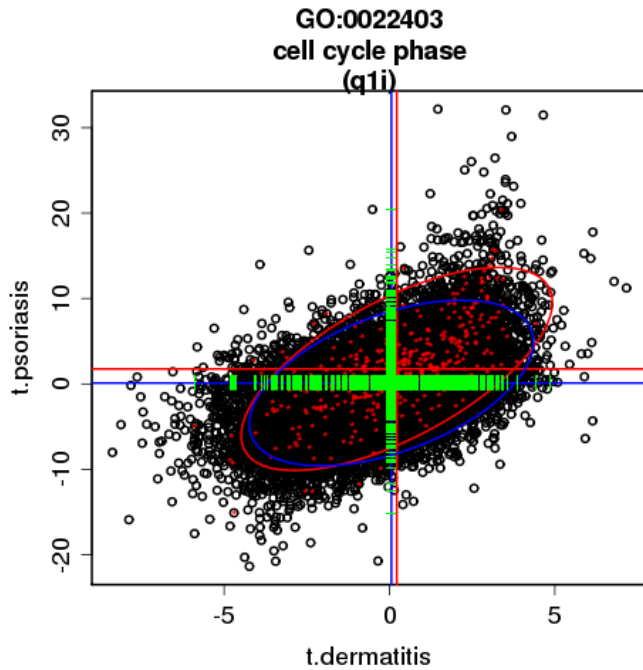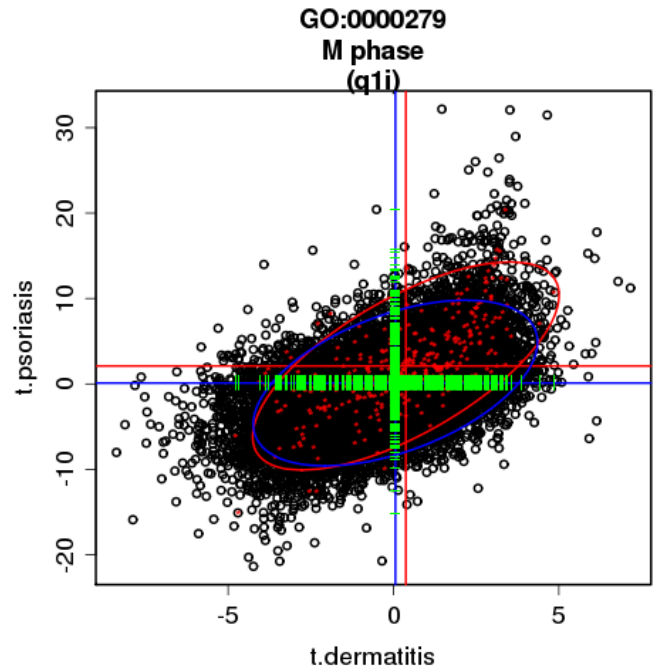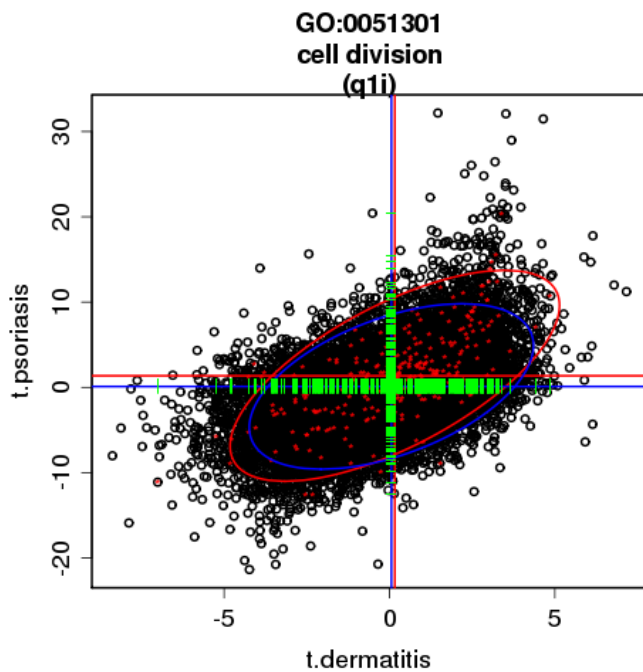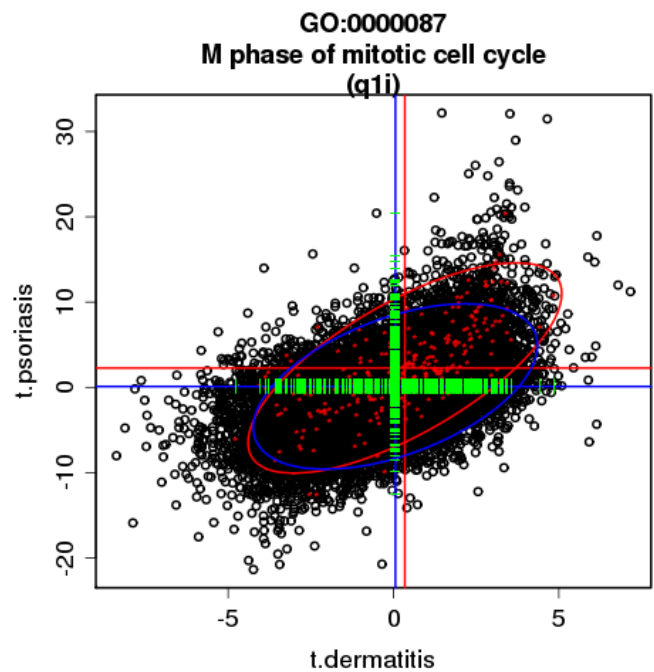

GO:0048015  
phosphoinositide-mediated signaling  
(b13)

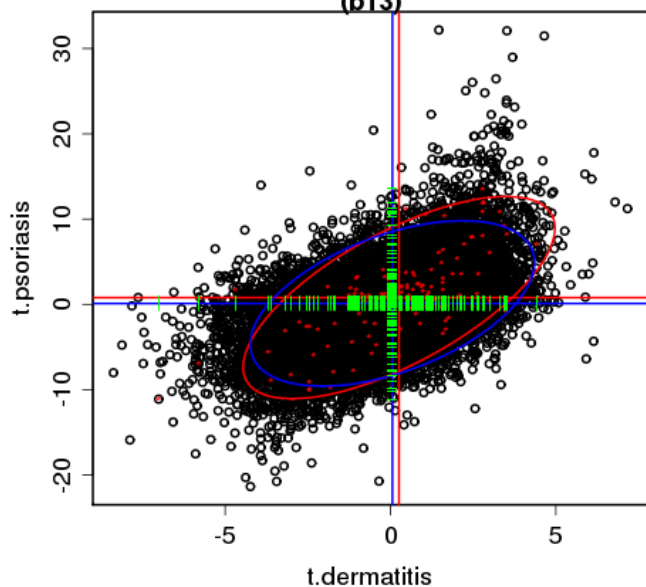

GO:0000302  
response to reactive oxygen species  
(b13)

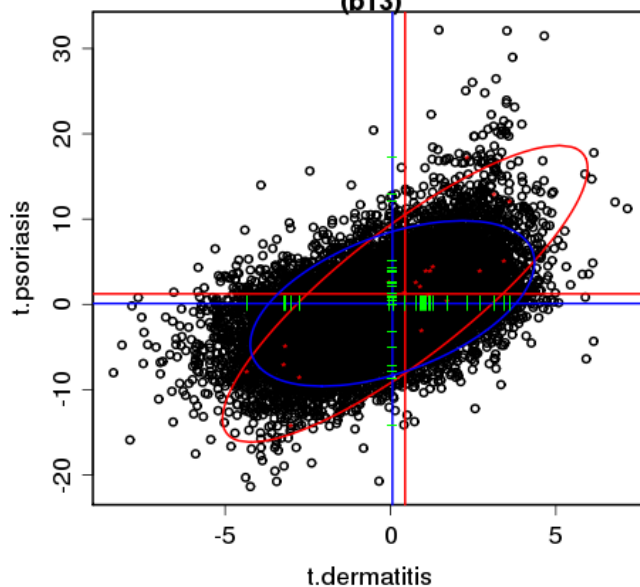

GO:0032945  
negative regulation of mononuclear cell proliferation  
(b24)

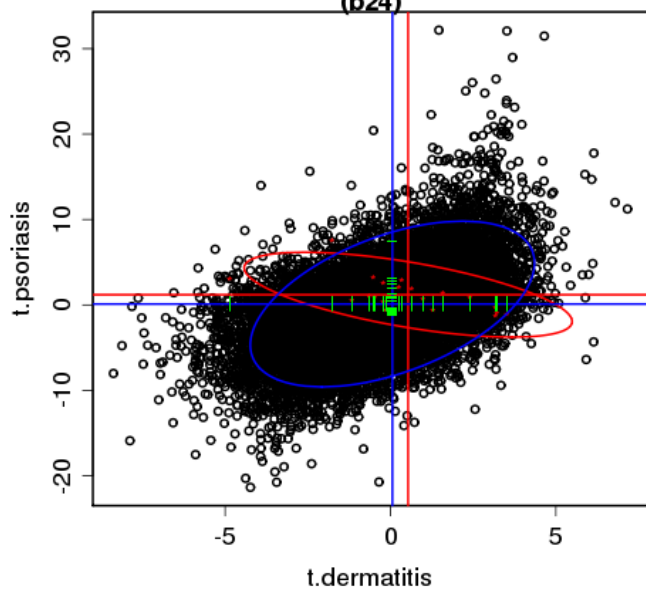

GO:0050672  
negative regulation of lymphocyte proliferation  
(b24)

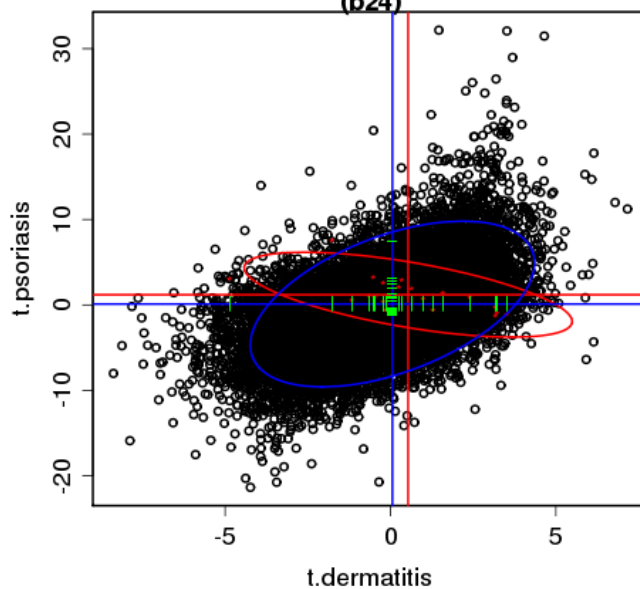

GO:0048589  
developmental growth  
(b24)

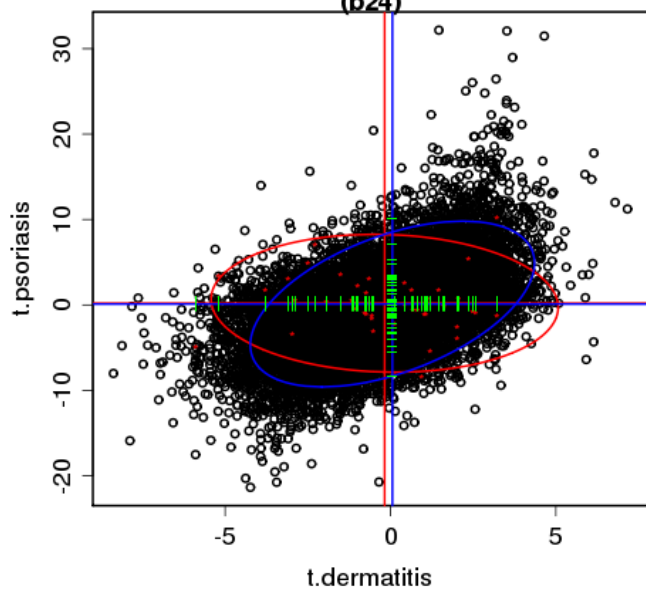

GO:0007028  
cytoplasm organization and biogenesis  
(b24)

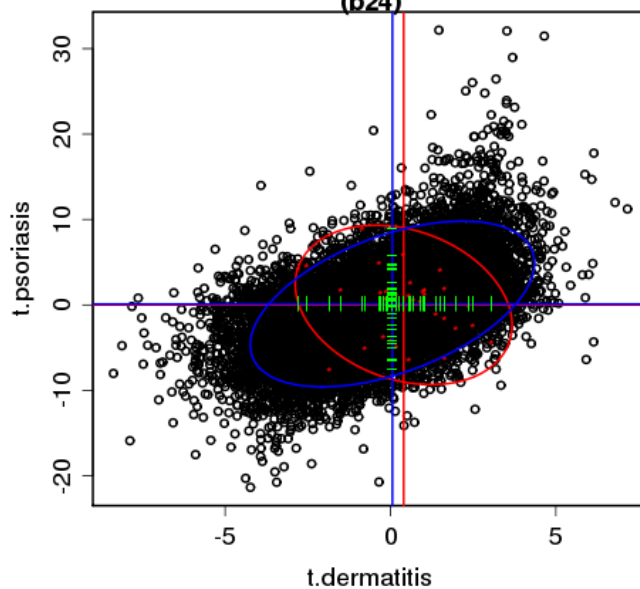

GO:0007043  
cell-cell junction assembly  
(b24)

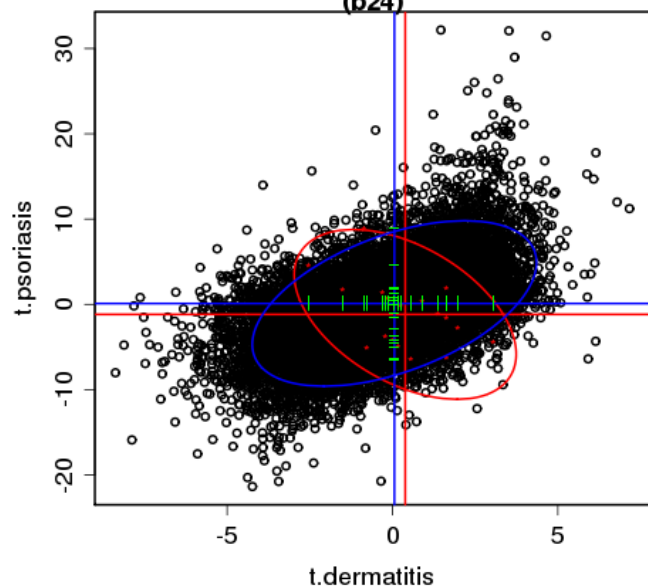

GO:0045216  
cell-cell junction assembly and maintenance  
(b24)

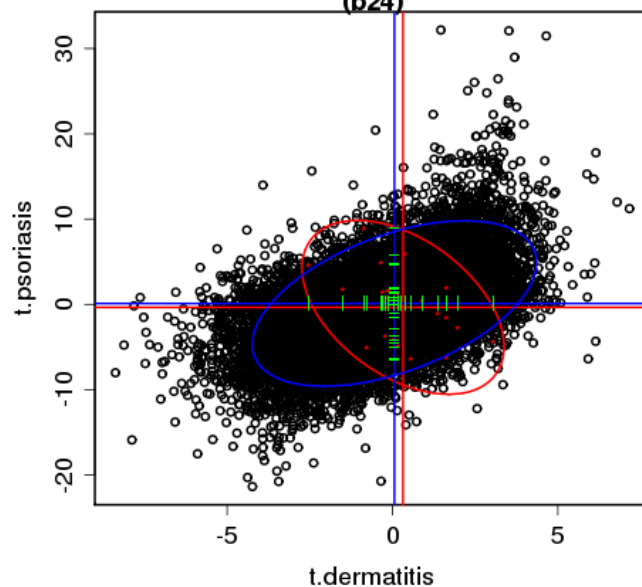

GO:0009607  
response to biotic stimulus  
(q1f)

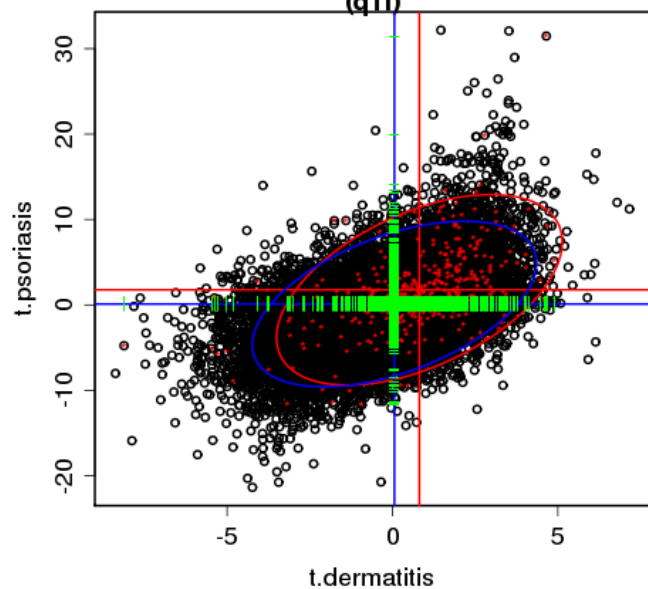

GO:0051704  
multi-organism process  
(q1f)

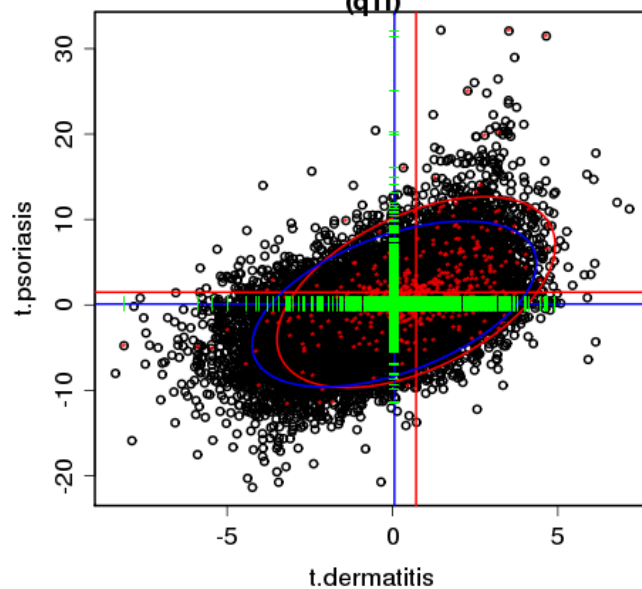

GO:0045893  
positive regulation of transcription, DNA-dependent  
(q2f)

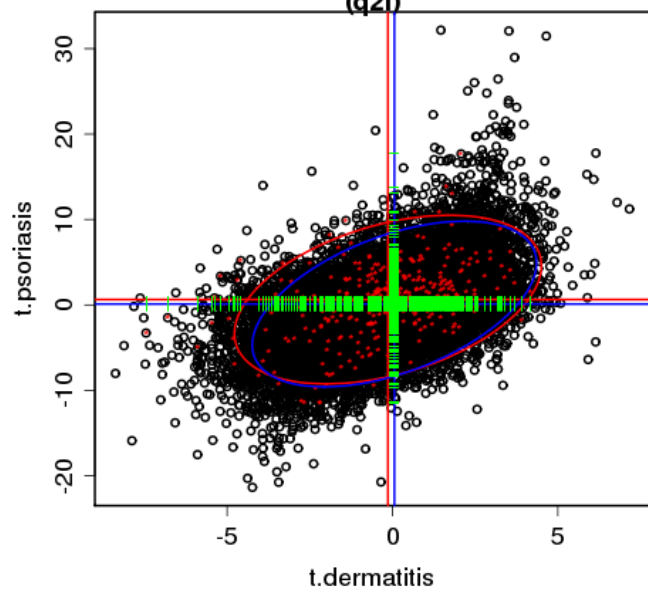

GO:0045935  
nucleobase, nucleoside, nucleotide and nucleic acid metabolism  
(q2f)

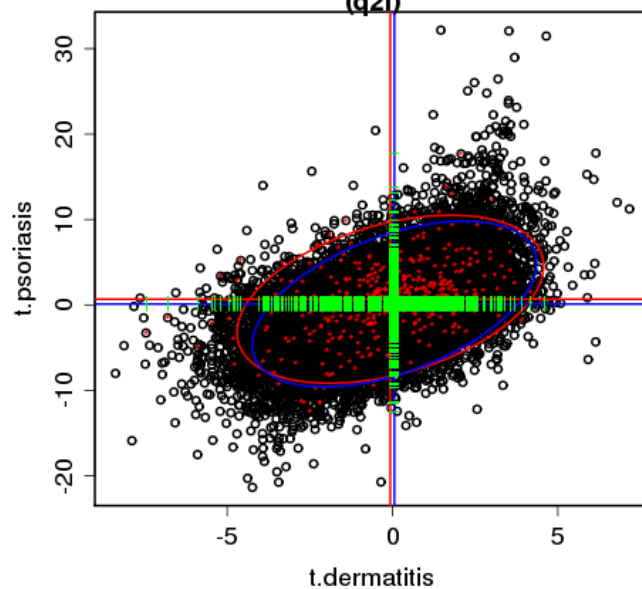

GO:0045941  
positive regulation of transcription  
(q2f)

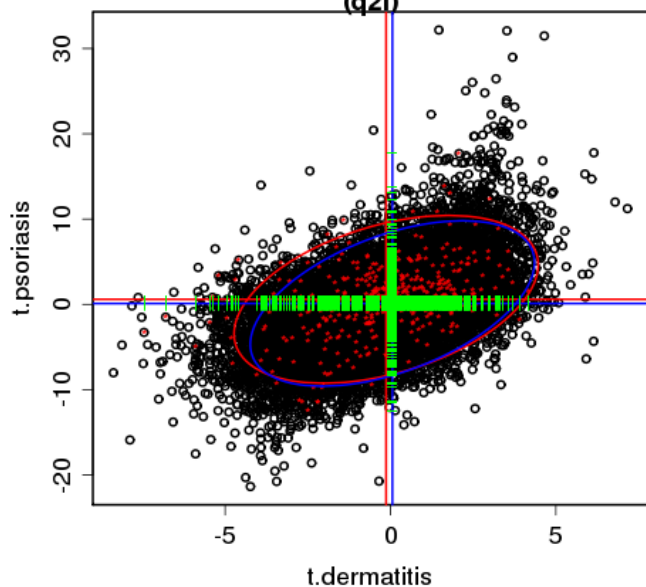

GO:0051254  
positive regulation of RNA metabolic process  
(q2f)

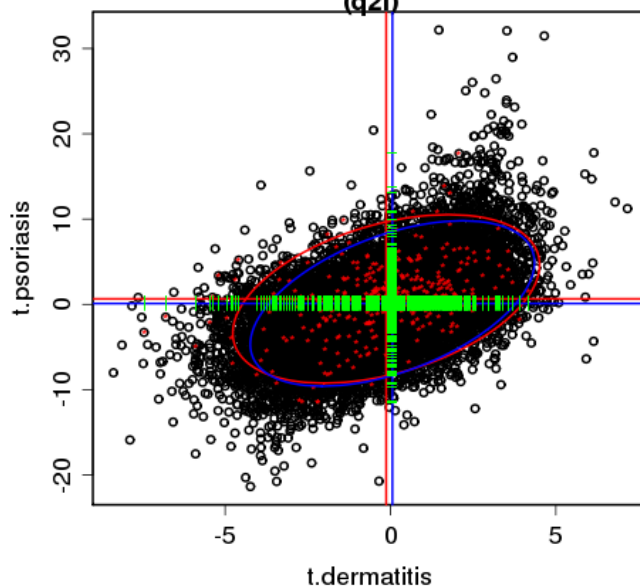

GO:0016481  
negative regulation of transcription  
(q2f)

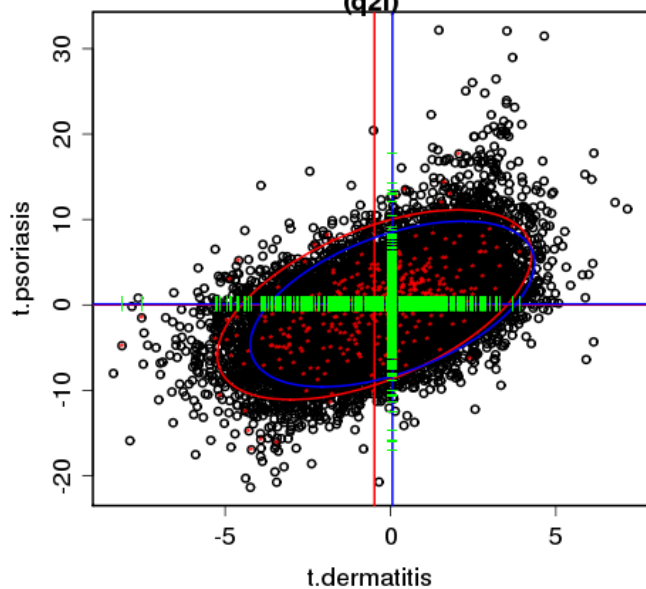

GO:0045892  
negative regulation of transcription, DNA-dependent  
(q2f)

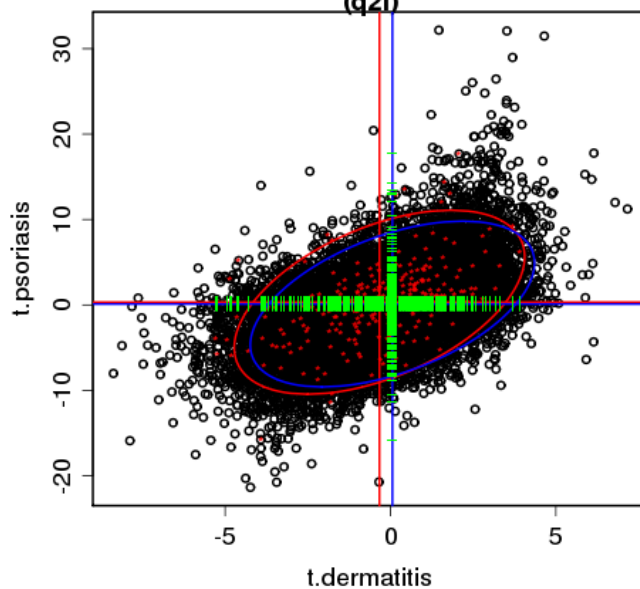

GO:0045934  
synthesis of nucleobase, nucleoside, nucleotide and nucleic acid  
(q2f)

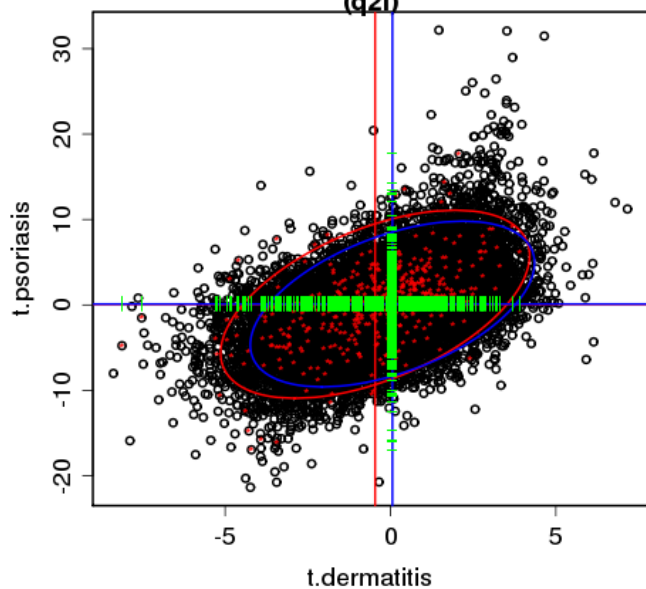

GO:0051253  
negative regulation of RNA metabolic process  
(q2f)

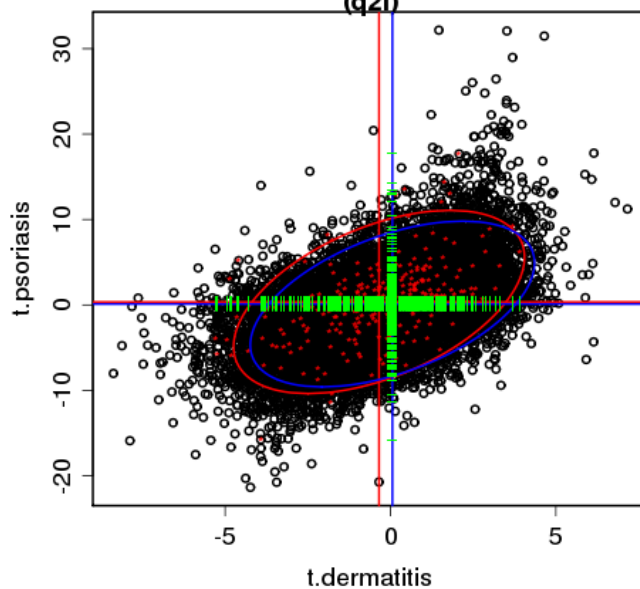

**GO:0009719**  
**response to endogenous stimulus**  
**(q2f)**

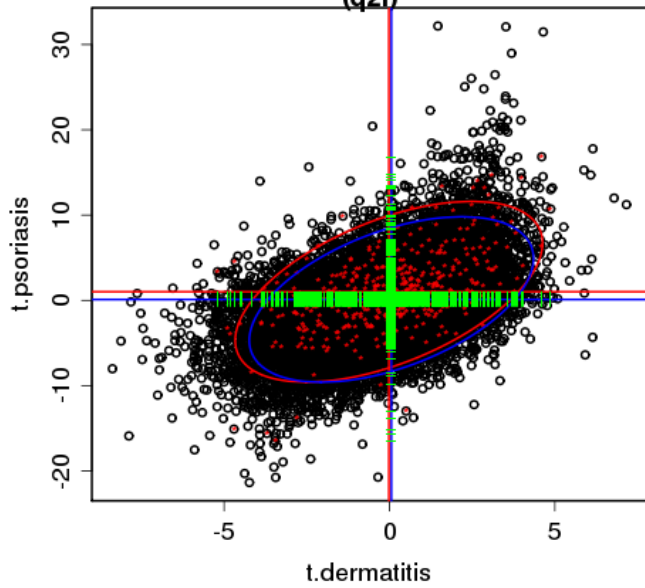

**GO:0006281**  
**DNA repair**  
**(q2f)**

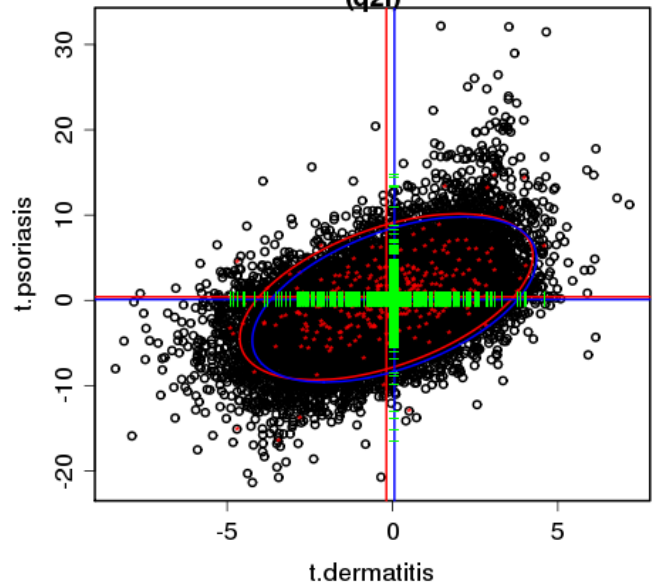

**GO:0006974**  
**response to DNA damage stimulus**  
**(q2f)**

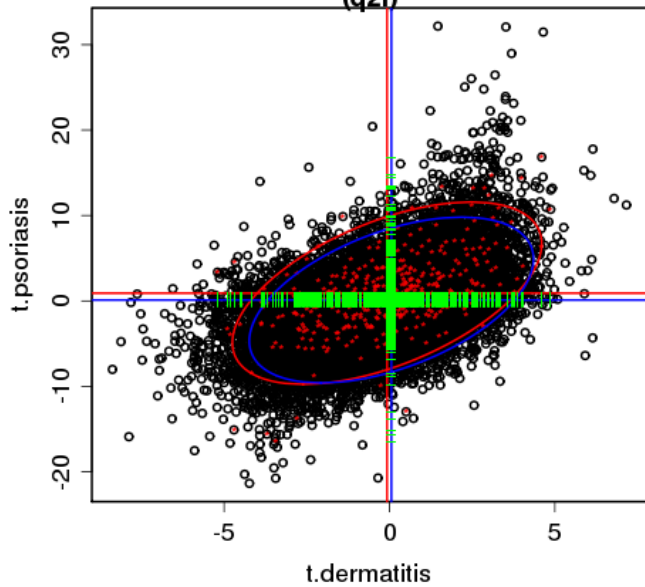

**GO:0006512**

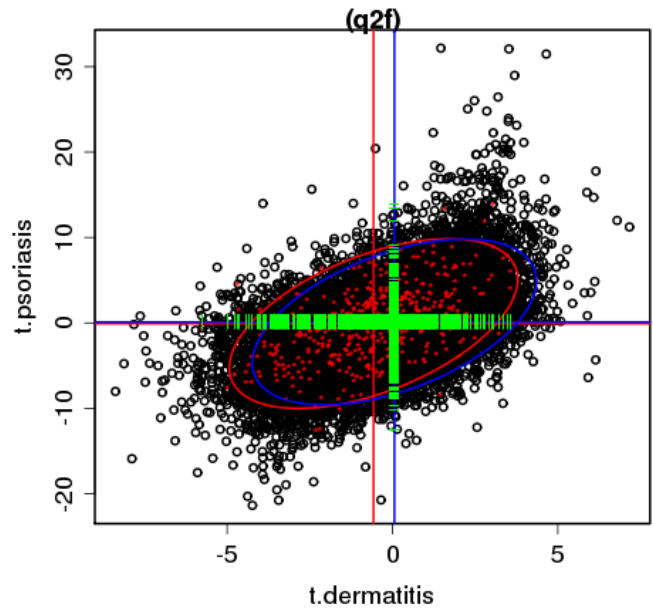

**GO:0016567**  
**protein ubiquitination**  
**(q2f)**

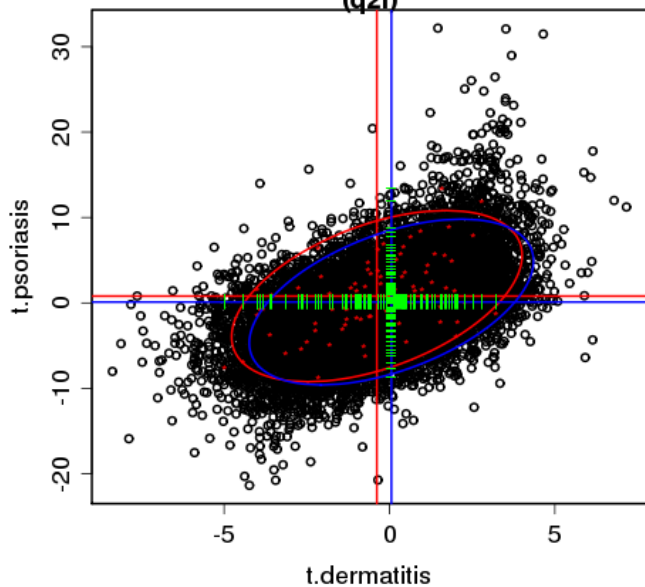

**GO:0032446**  
**protein modification by small protein conjugation**  
**(q2f)**

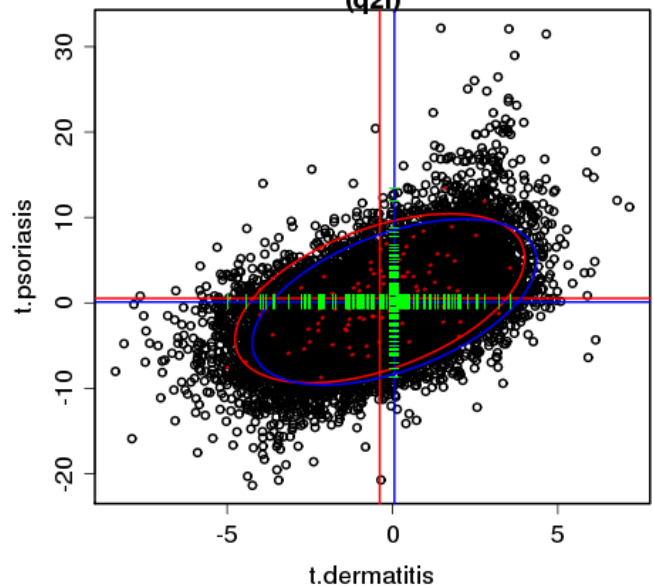



GO:0016125  
sterol metabolic process  
(q2f)

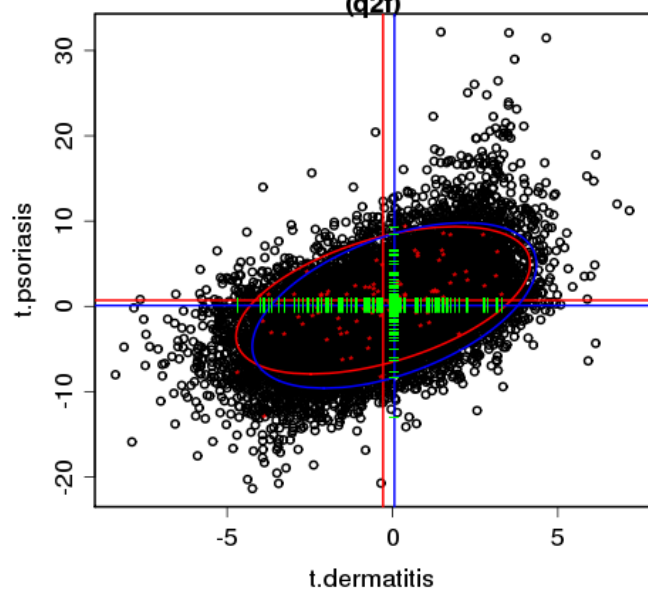

GO:0006913  
nucleocytoplasmic transport  
(q2f)

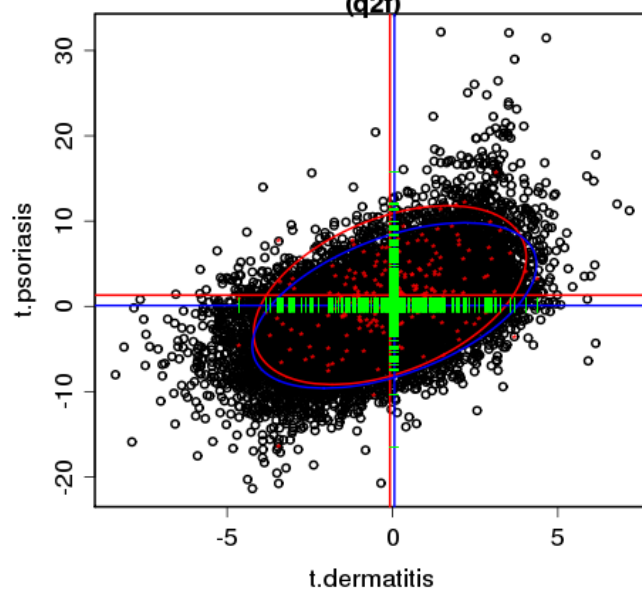

GO:0051169  
nuclear transport  
(q2f)

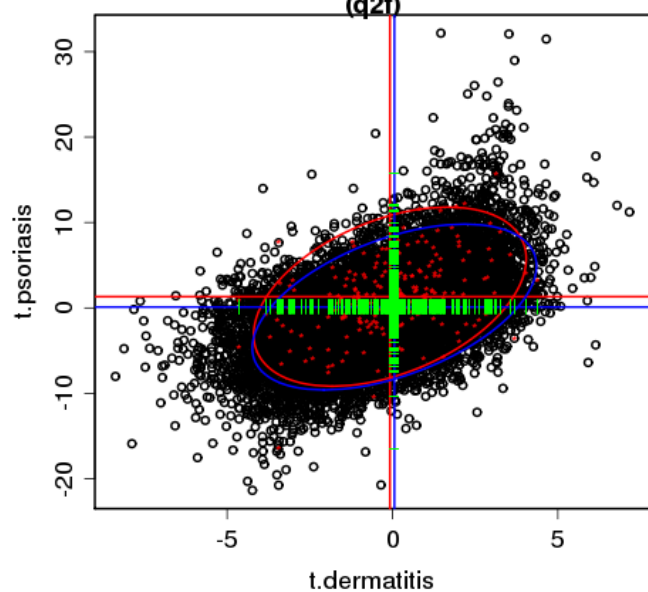

GO:0006605  
protein targeting  
(q2f)

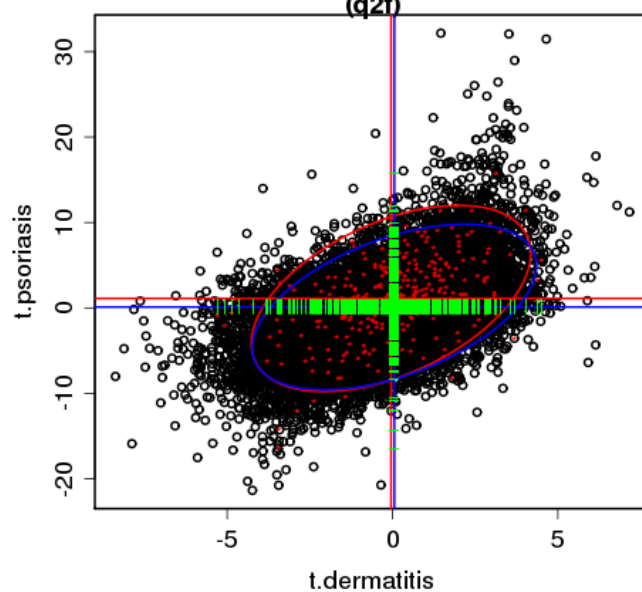

GO:0006606  
protein import into nucleus  
(q2f)

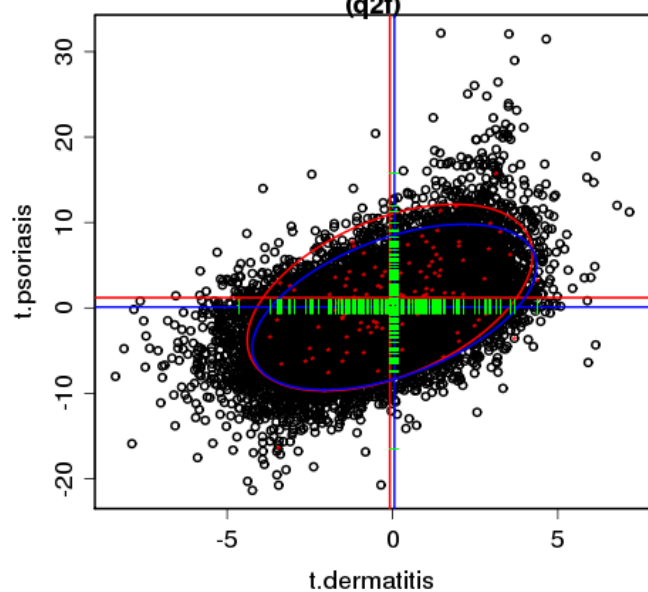

GO:0006886  
intracellular protein transport  
(q2f)

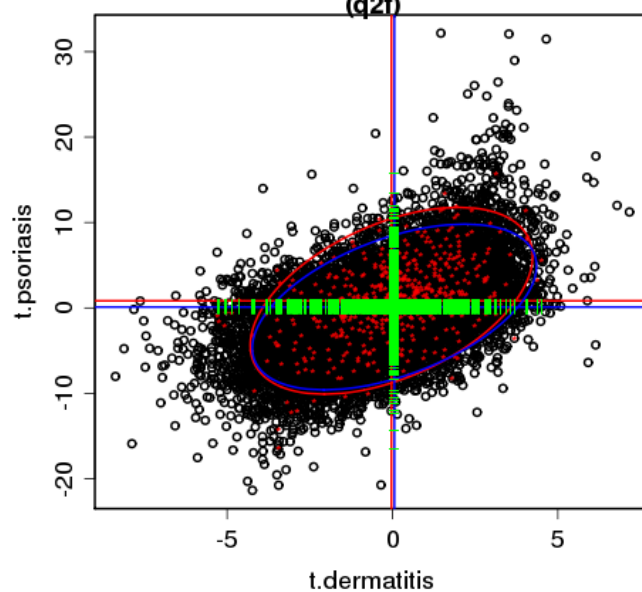

**GO:0043285**  
**biopolymer catabolic process**  
**(q2f)**

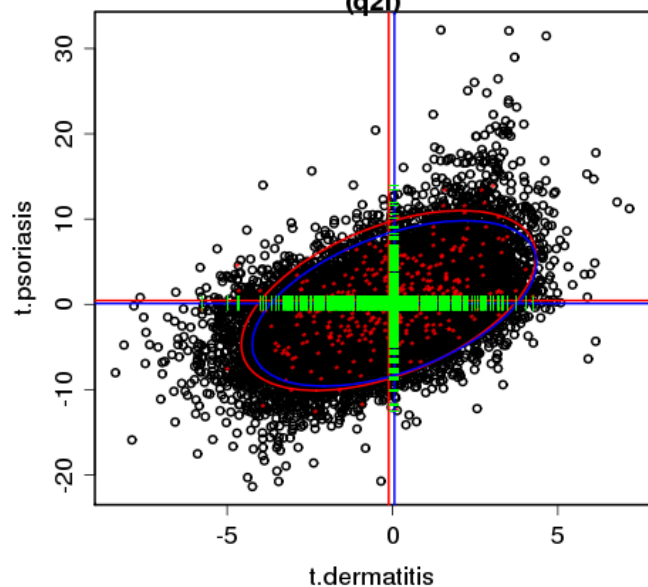

**GO:0008544**  
**epidermis development**  
**(q2f)**

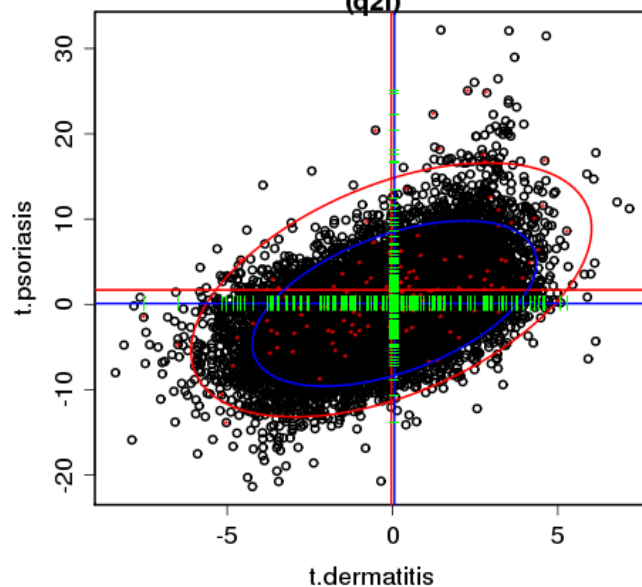

**GO:0030163**  
**protein catabolic process**  
**(q2f)**

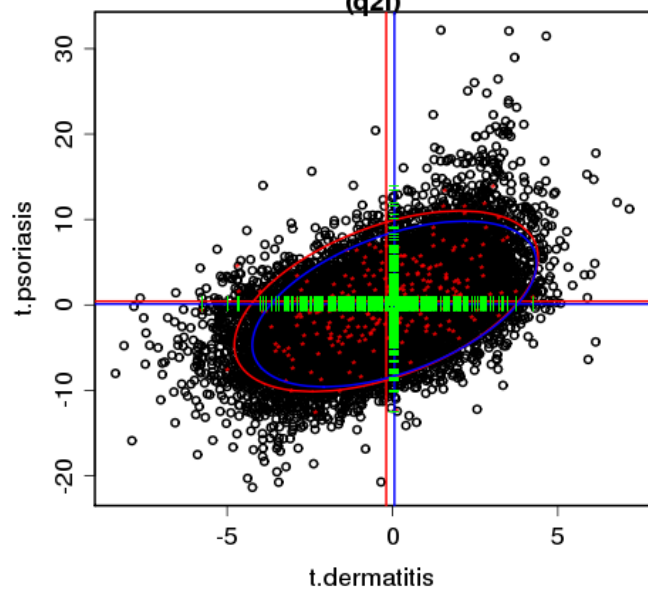

**GO:0016071**  
**mRNA metabolic process**  
**(q2f)**

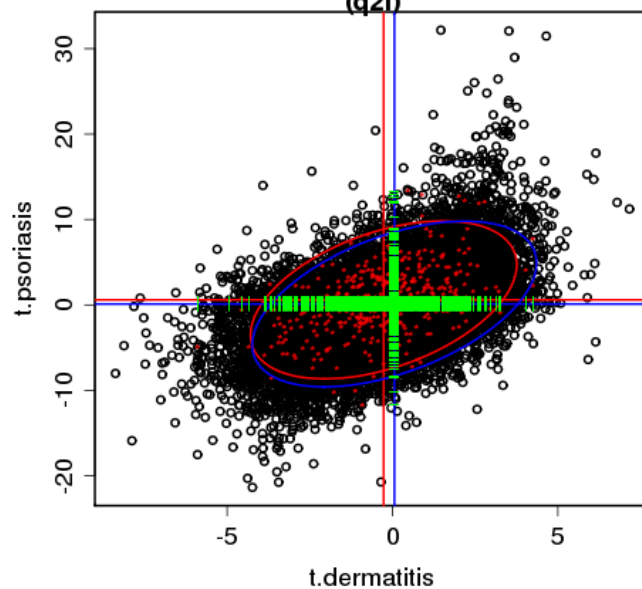

**GO:0008380**  
**RNA splicing**  
**(q2f)**

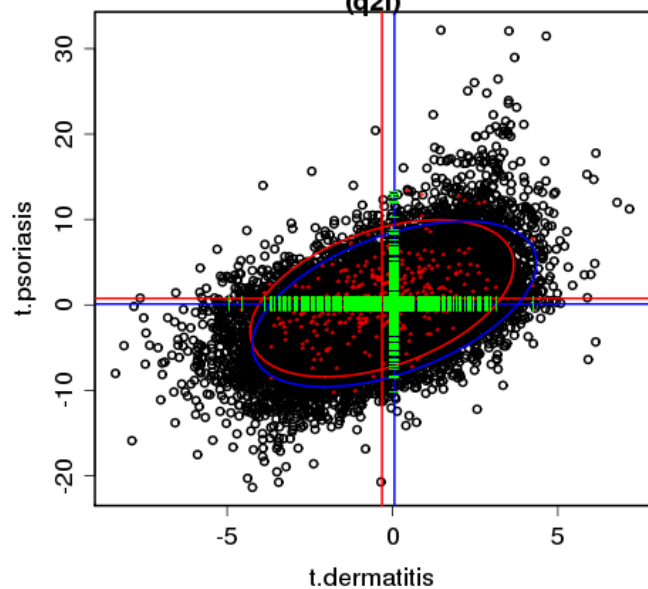

**GO:0006397**  
**mRNA processing**  
**(q2f)**

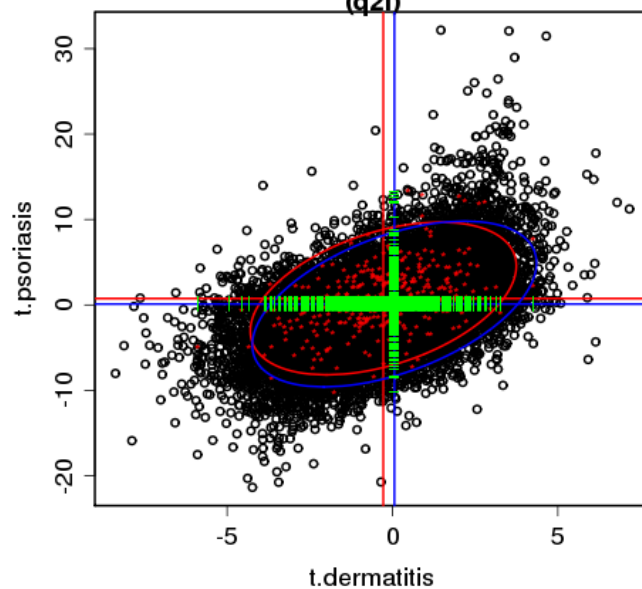



GO:0006403  
RNA localization  
(q2f)

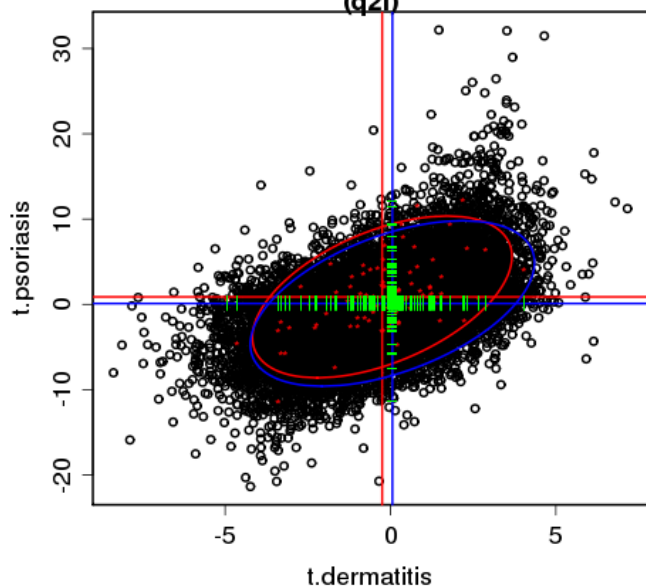

GO:0015931  
nucleobase, nucleoside, nucleotide and nucleic acid transp  
(q2f)

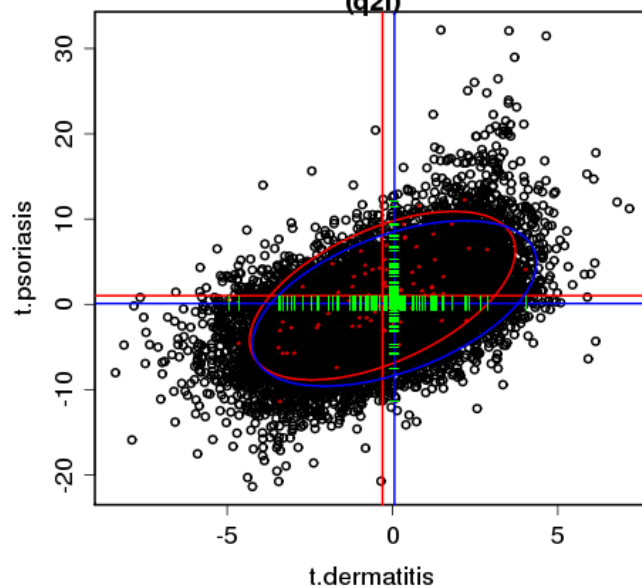

GO:0050657  
nucleic acid transport  
(q2f)

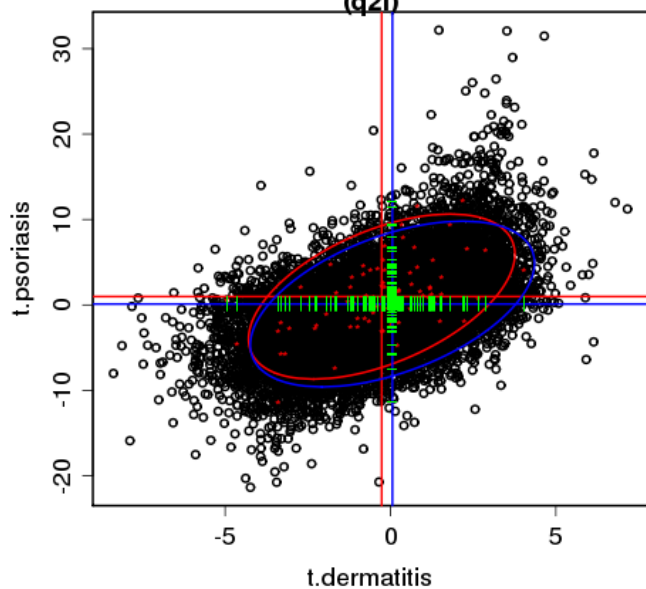

GO:0051236  
establishment of RNA localization  
(q2f)

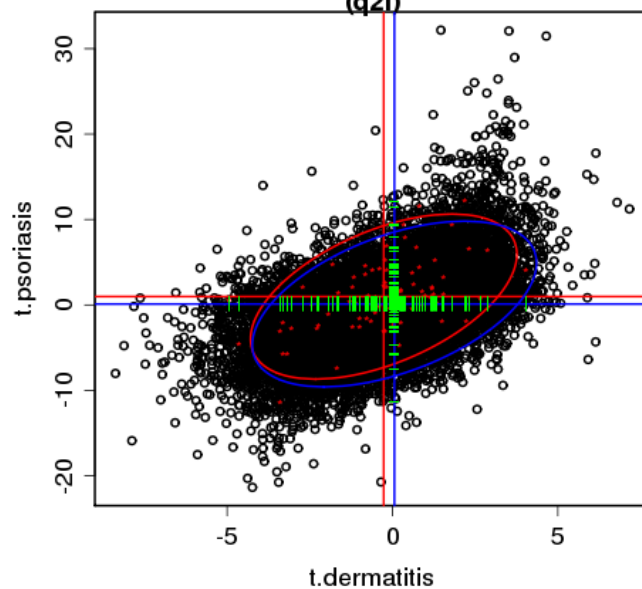

GO:0050658  
RNA transport  
(q2f)



GO:0051028  
mRNA transport  
(q2f)

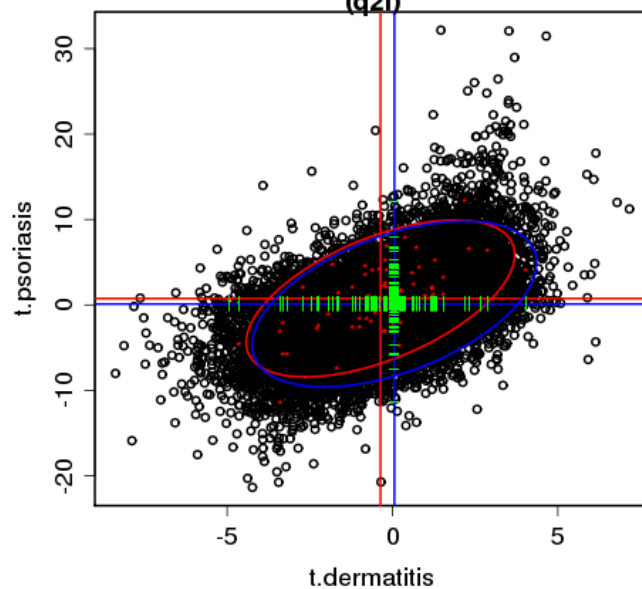

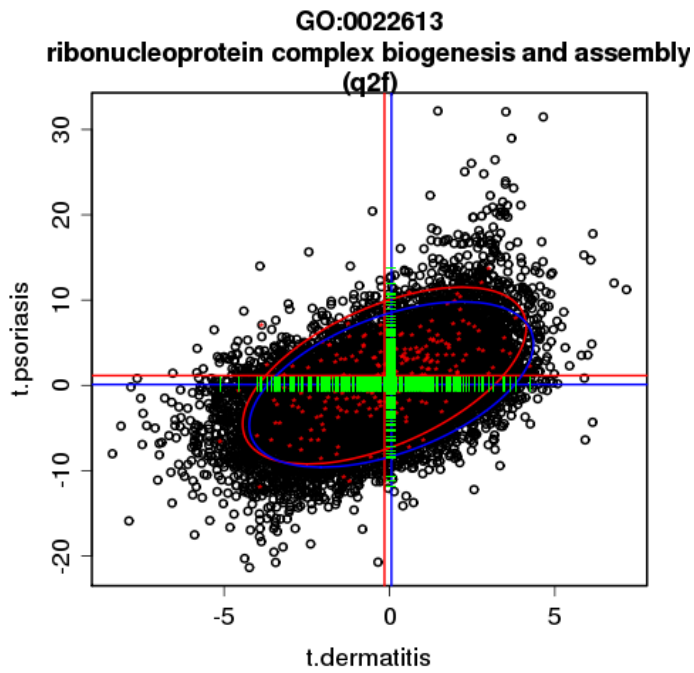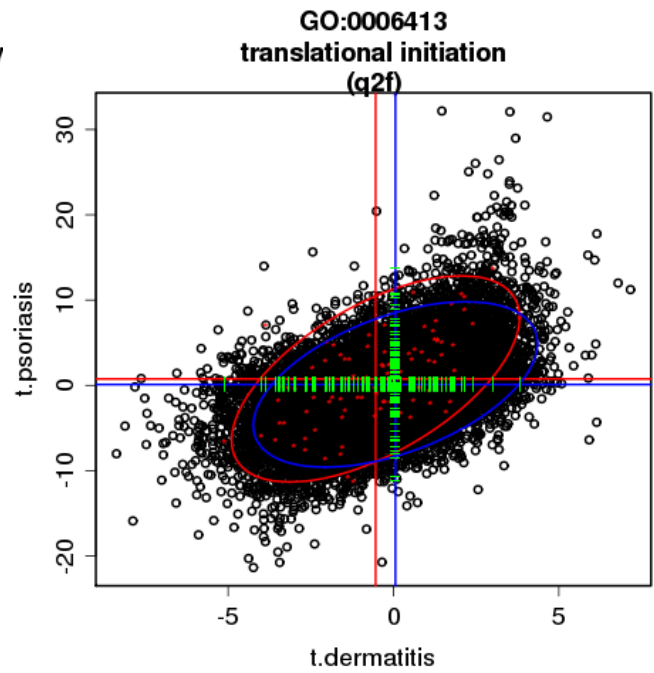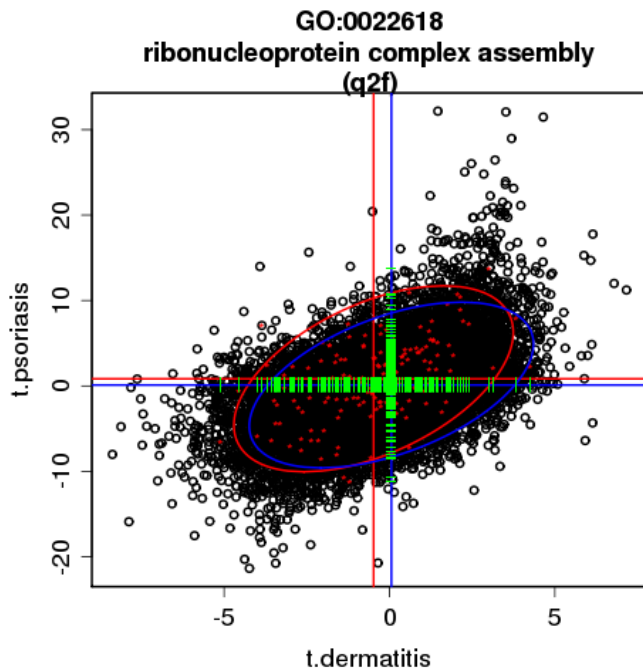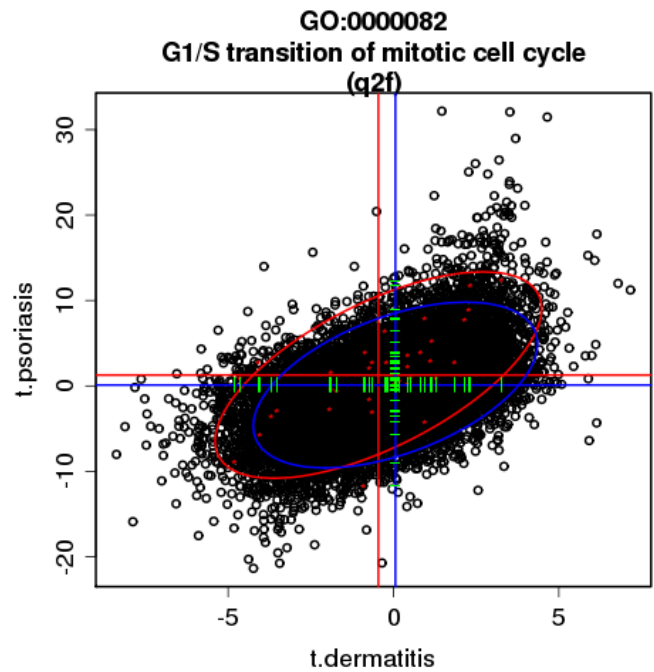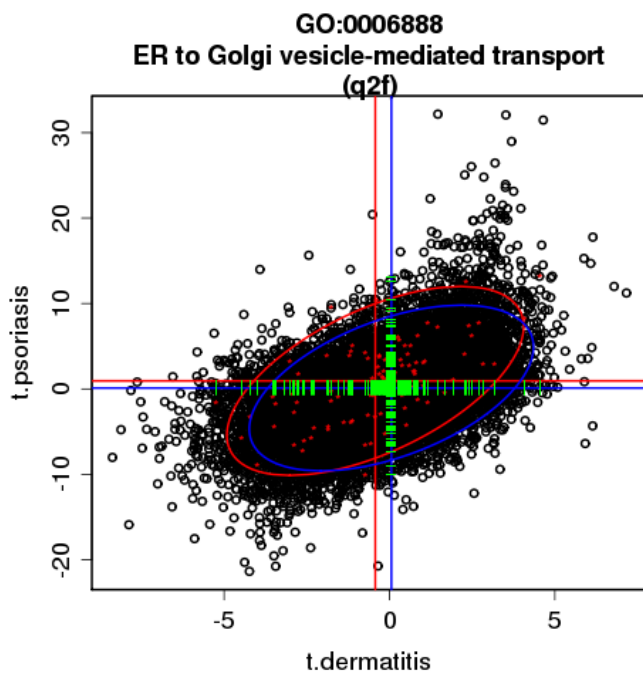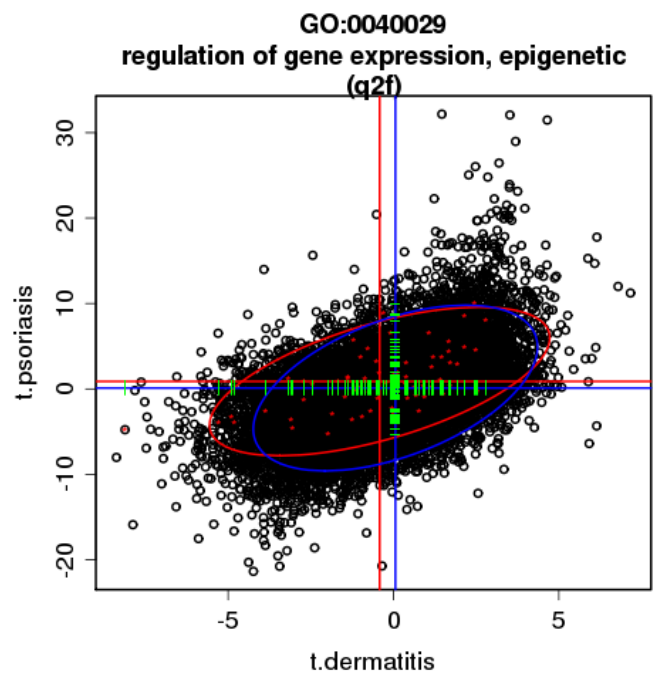

GO:0000075  
cell cycle checkpoint  
(q2f)

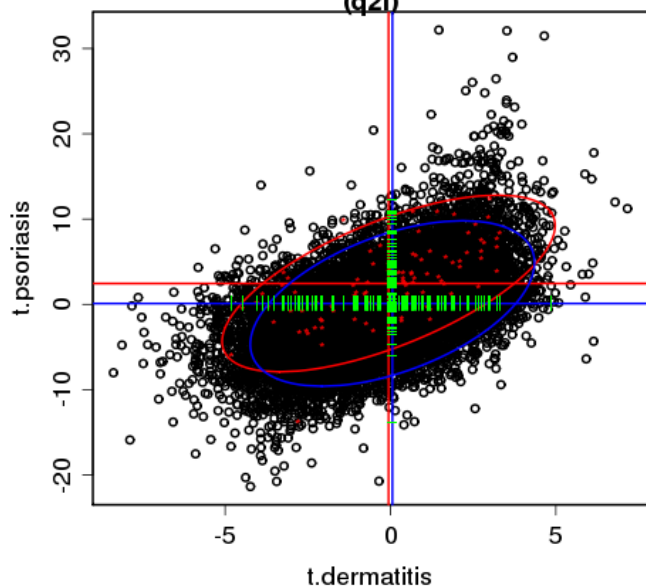

GO:0007093  
mitotic cell cycle checkpoint  
(q2f)

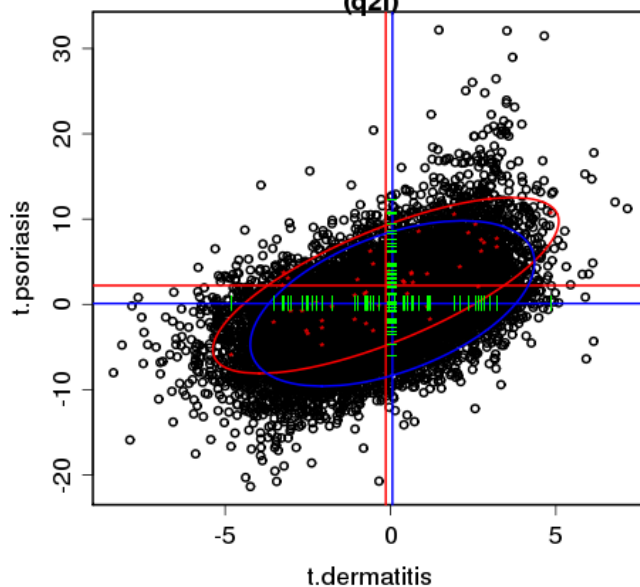

GO:0006470  
protein amino acid dephosphorylation  
(q2f)

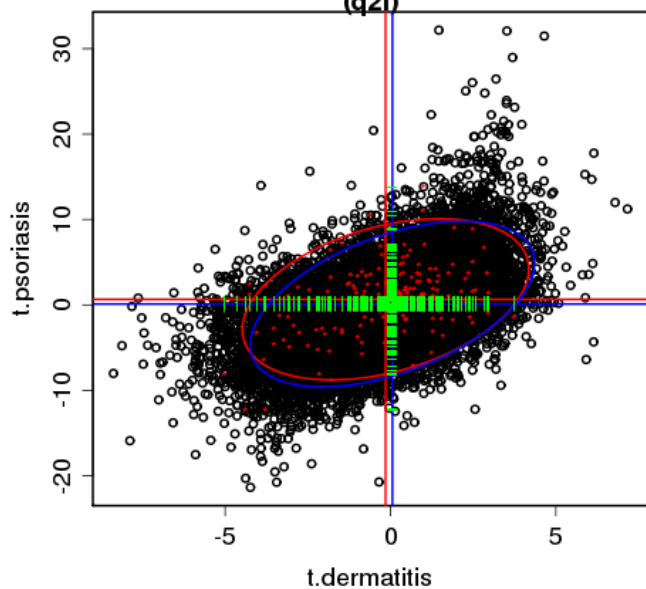

GO:0007567  
parturition  
(q2f)

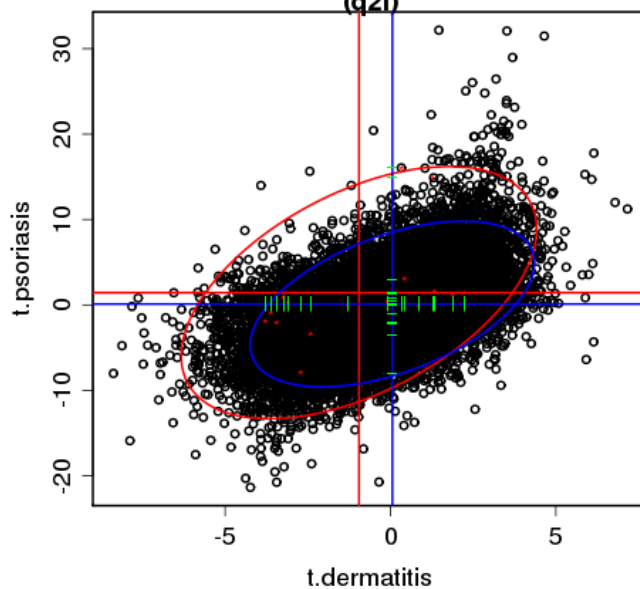

GO:0044257  
cellular protein catabolic process  
(q2f)

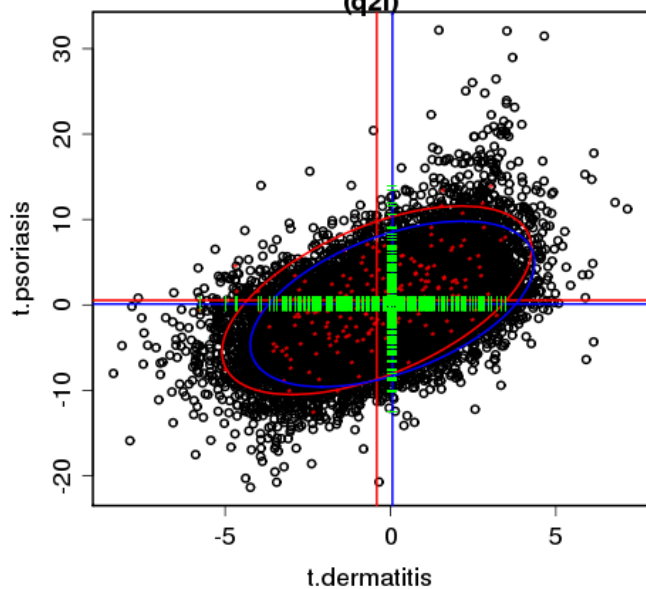

GO:0006511  
ubiquitin-dependent protein catabolic process  
(q2f)

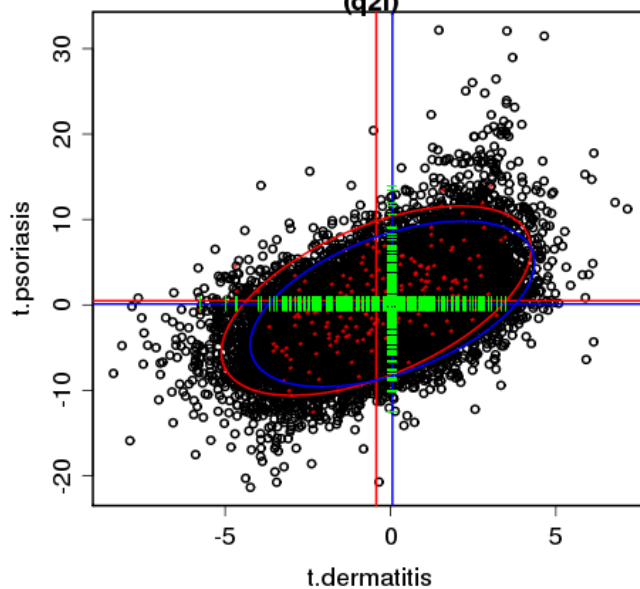

GO:0019941

modification-dependent protein catabolic process

(q2f)

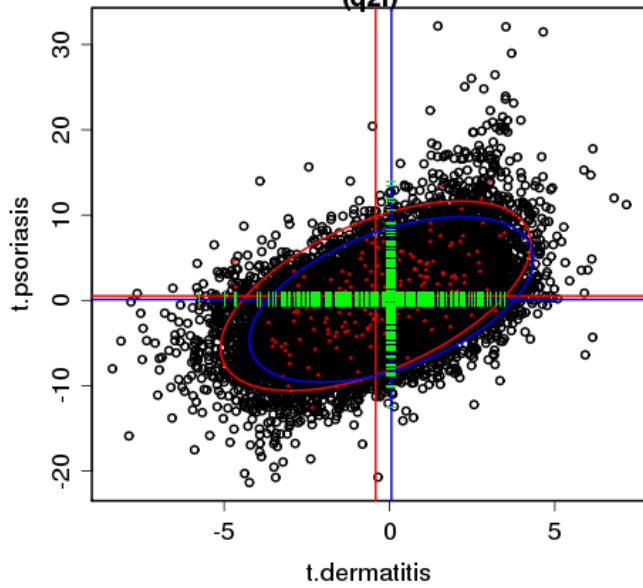

GO:0043632

modification-dependent macromolecule catabolic process

(q2f)

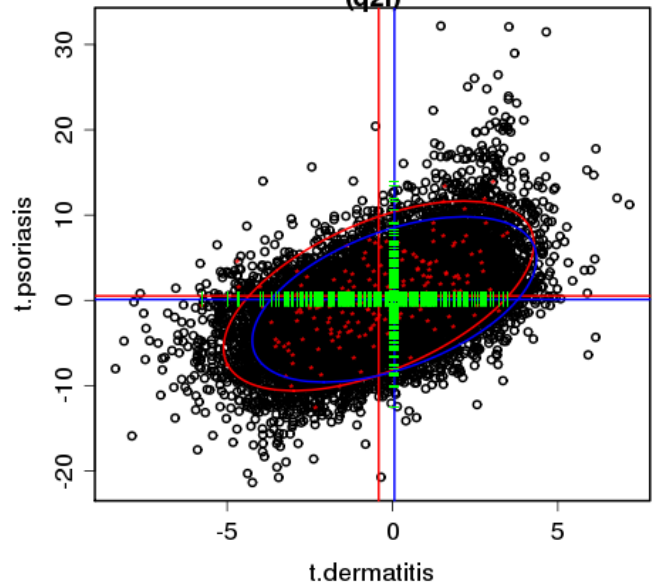

GO:0051603

proteolysis involved in cellular protein catabolic process

(q2f)

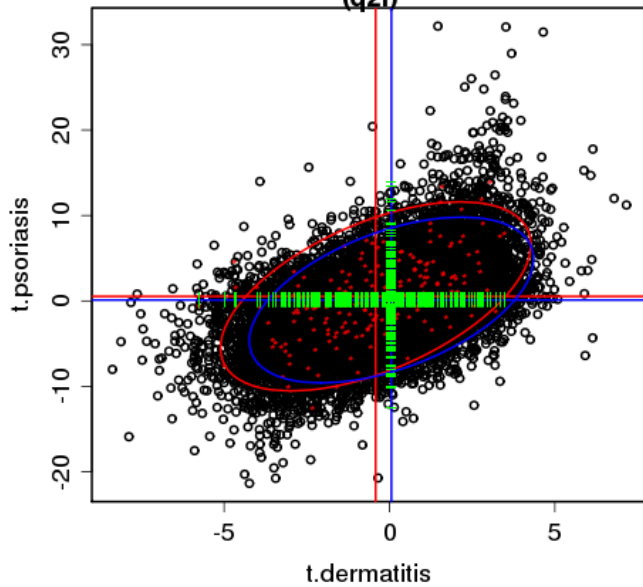

GO:0000375

RNA splicing, via transesterification reactions

(q2f)

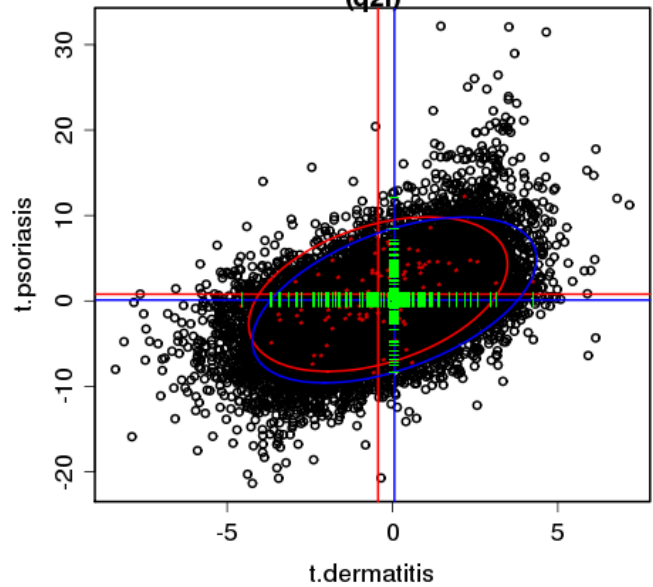

GO:0000377

RNA splicing, via transesterification reactions with bulged adenosine

(q2f)

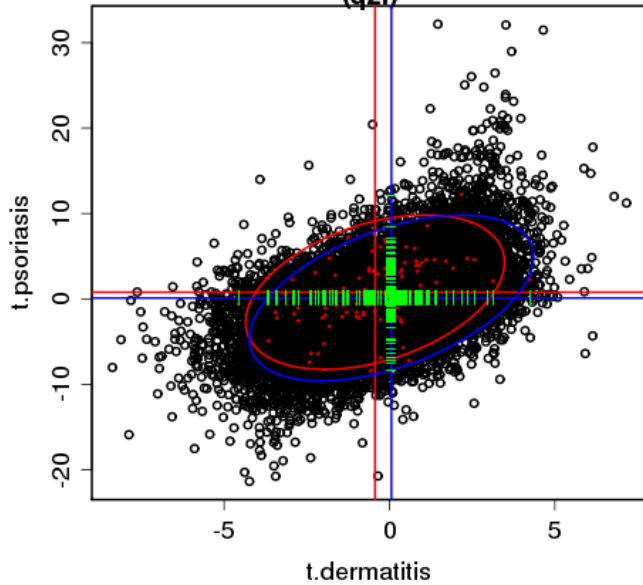

GO:0000398

nuclear mRNA splicing, via spliceosome

(q2f)

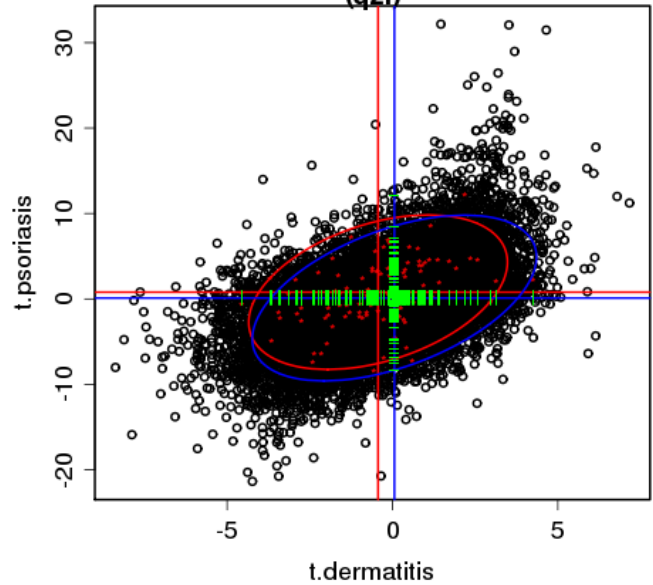

**GO:0045646**  
**regulation of erythrocyte differentiation**  
**(q2f)**

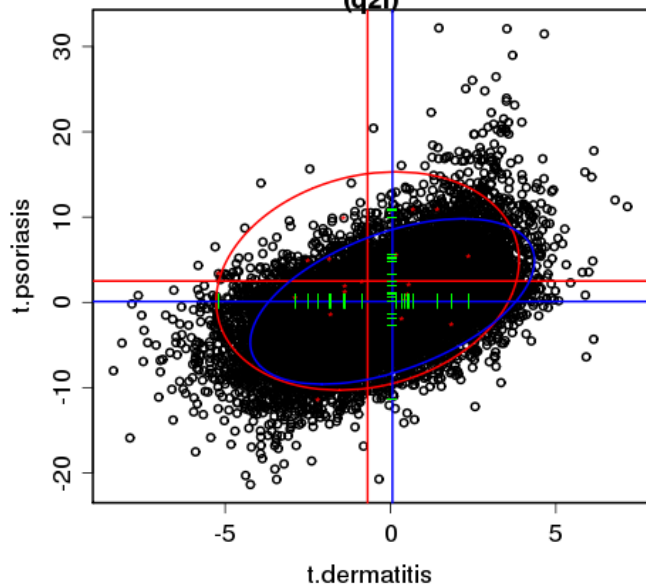

**GO:0030216**  
**keratinocyte differentiation**  
**(q2f)**

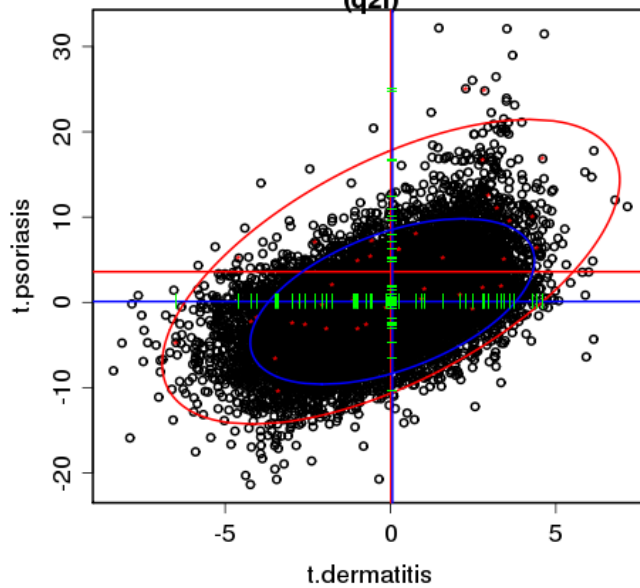

**GO:0016573**  
**histone acetylation**  
**(q3f)**

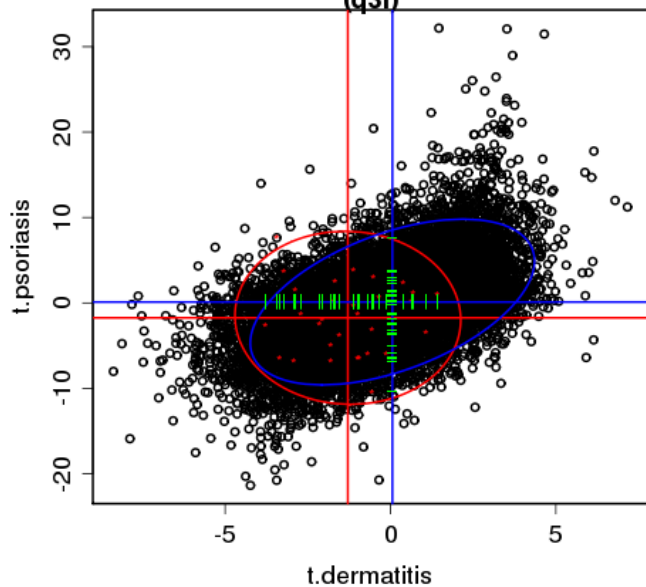

**GO:0006892**  
**post-Golgi vesicle-mediated transport**  
**(q3f)**

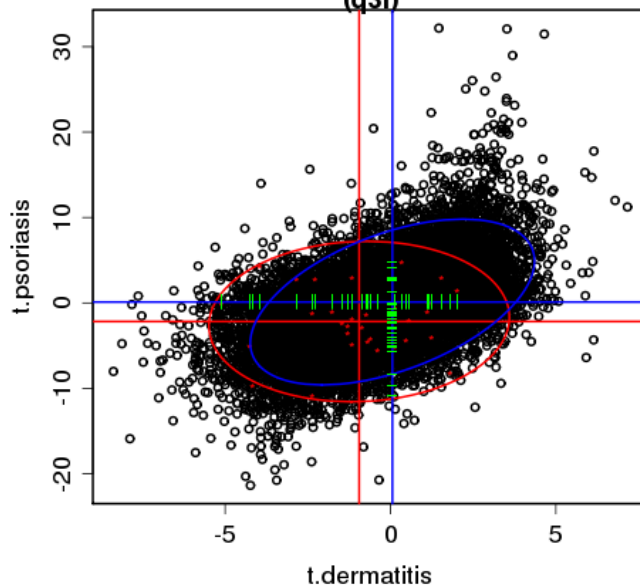

**GO:0015698**  
**inorganic anion transport**  
**(q4f)**

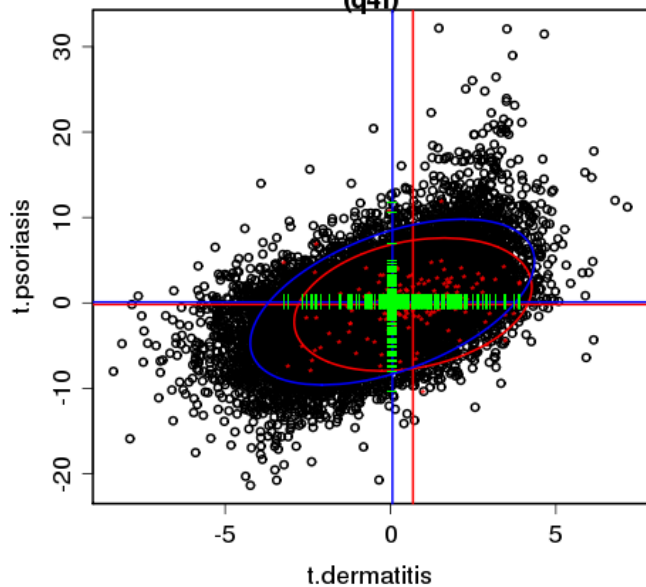

**GO:0016477**  
**cell migration**  
**(q4f)**

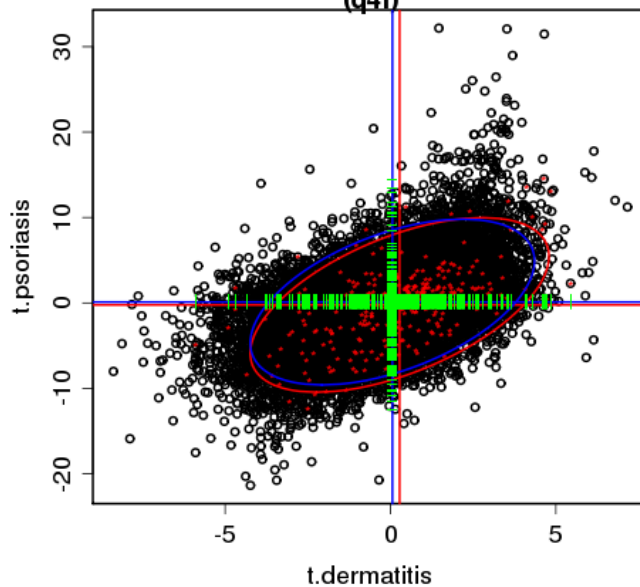



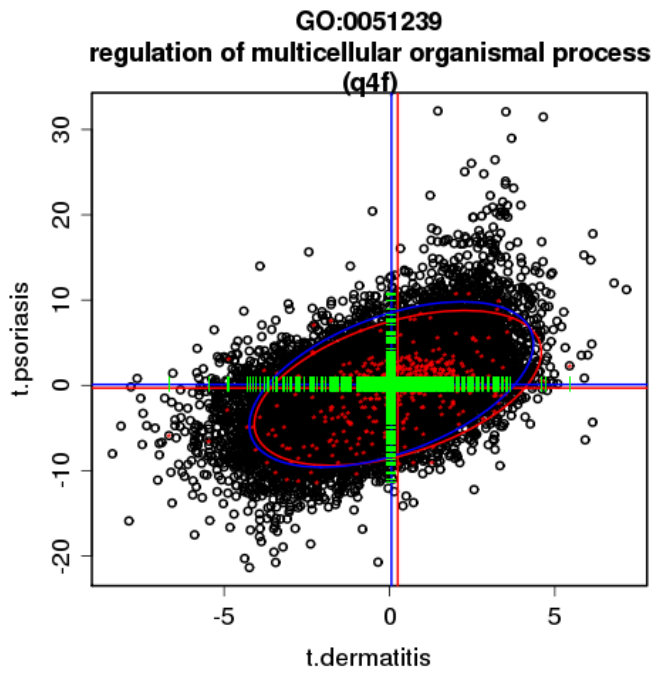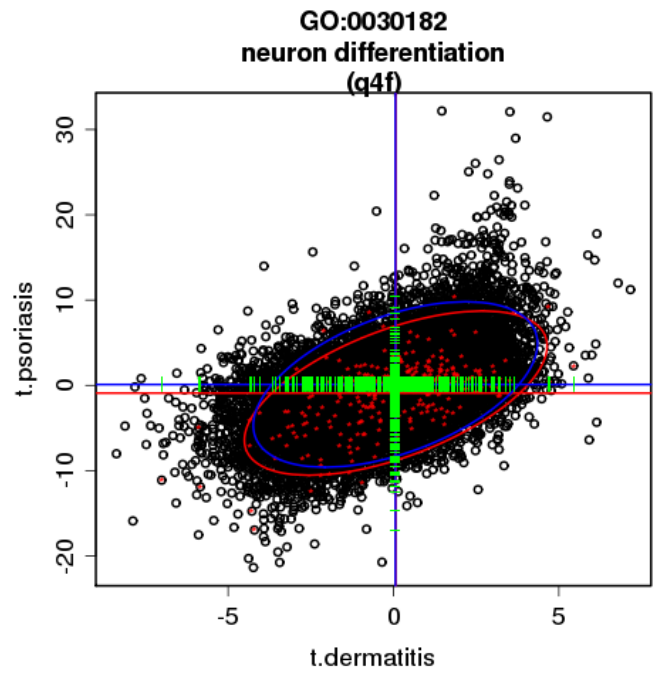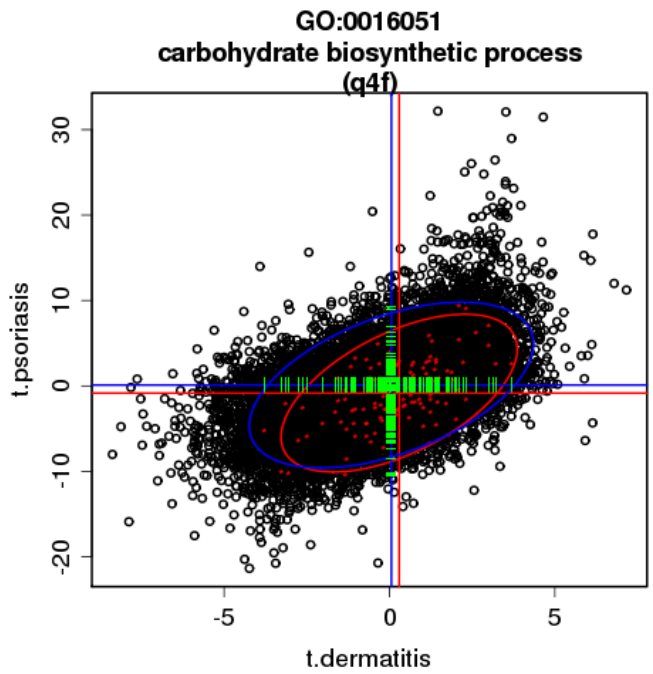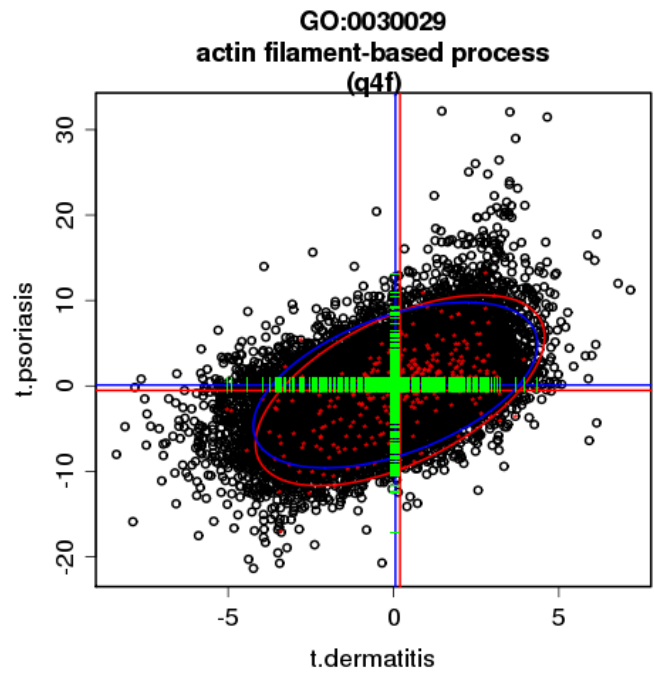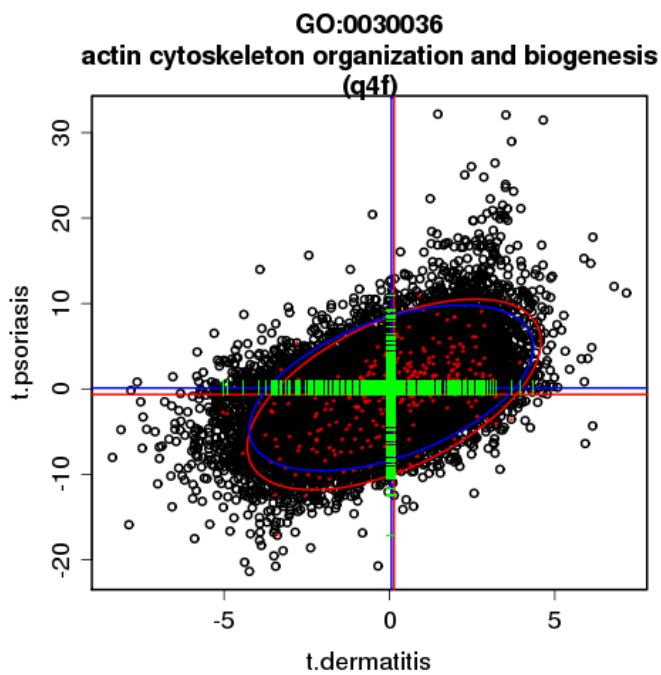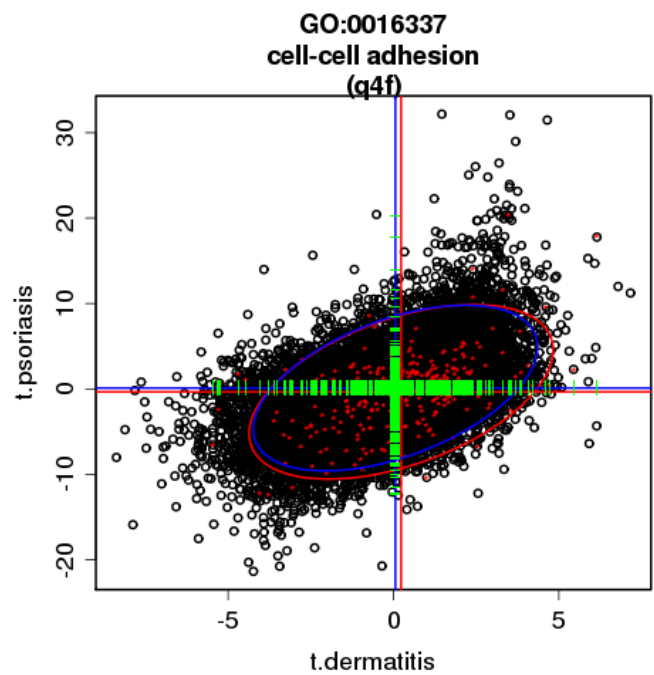

GO:0031032

actomyosin structure organization and biogenesis  
(q4f)

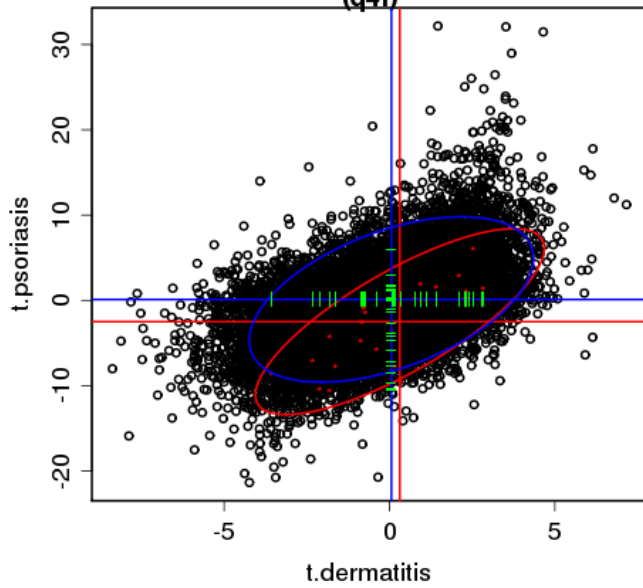

GO:0048627

myoblast development  
(q4f)

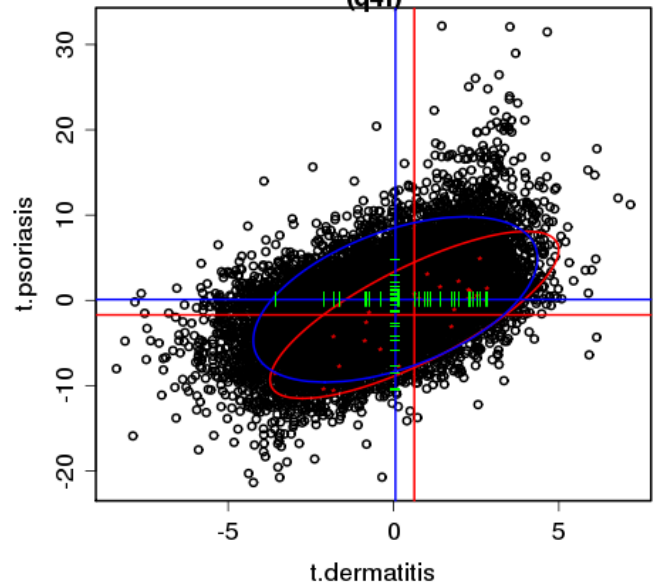

GO:0048628

myoblast maturation  
(q4f)

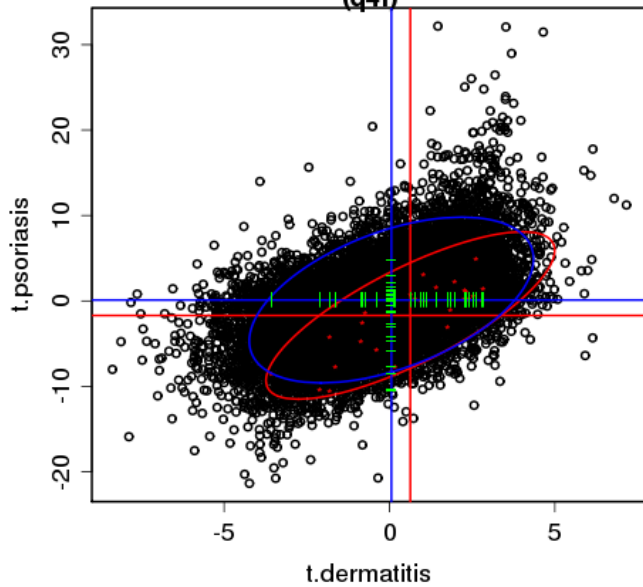

GO:0007600

sensory perception  
(q4f)

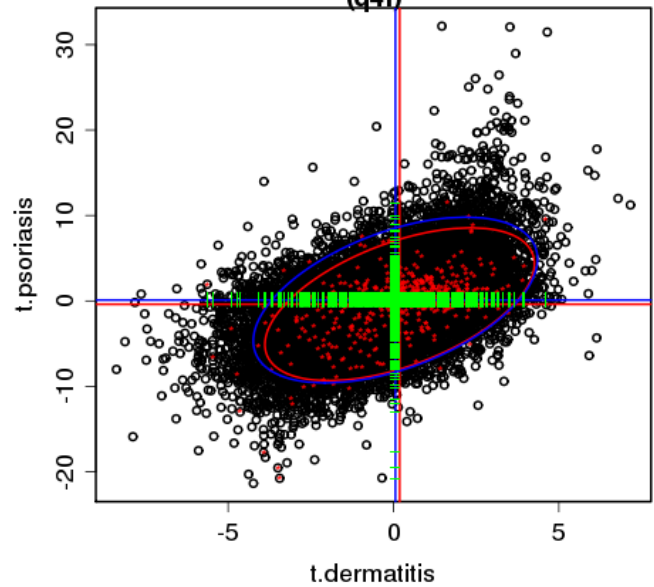

GO:0031589

cell-substrate adhesion  
(q4f)

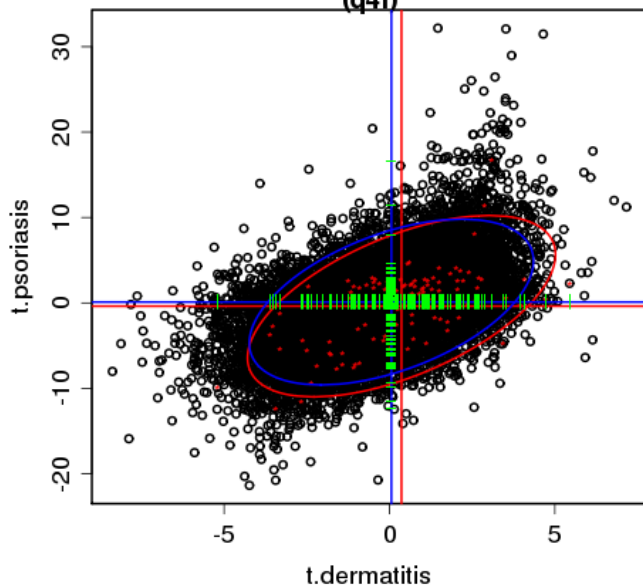

GO:0050953

sensory perception of light stimulus  
(q4f)

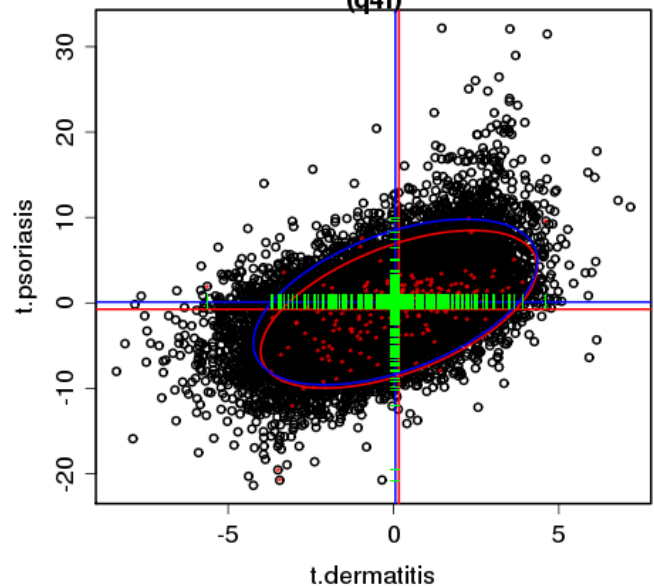

**GO:0007601**  
**visual perception**  
**(q4f)**

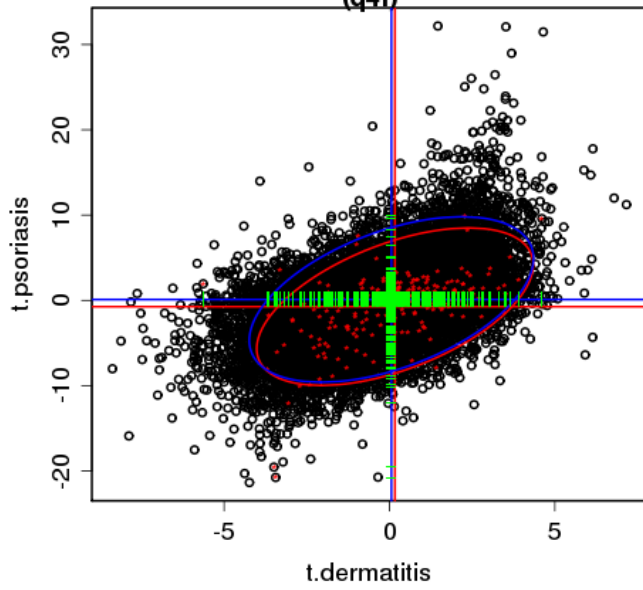

**GO:0043062**  
**extracellular structure organization and biogenesis**  
**(q4f)**

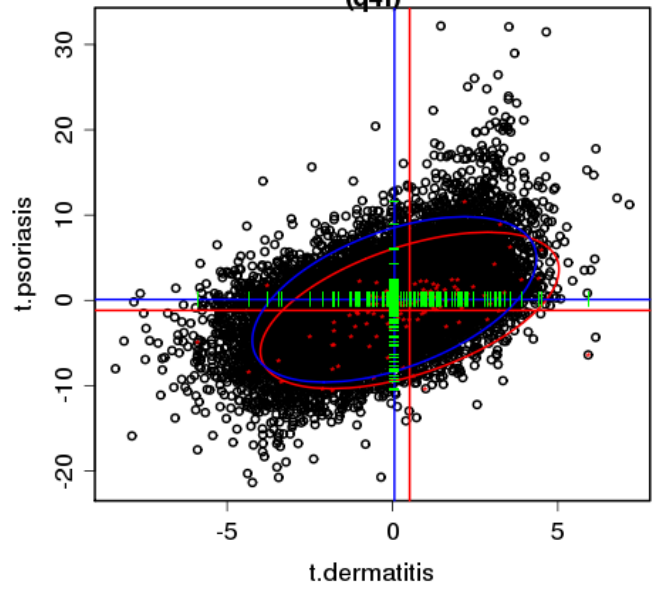

**GO:0030198**  
**extracellular matrix organization and biogenesis**  
**(q4f)**

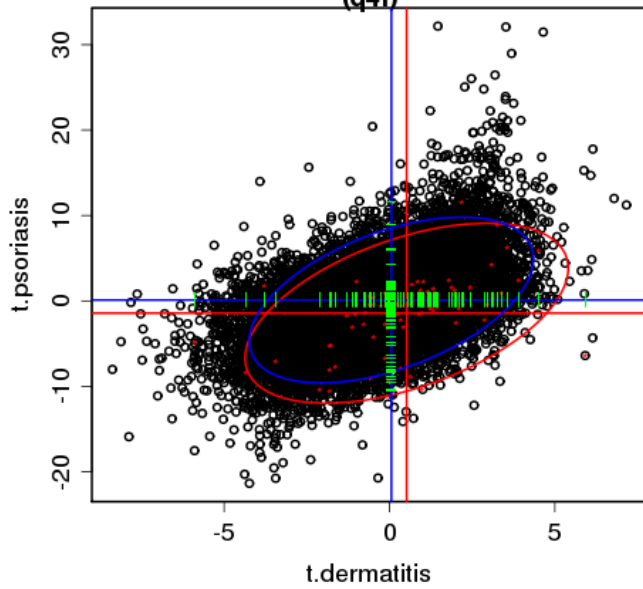

**GO:0051046**  
**regulation of secretion**  
**(q4f)**

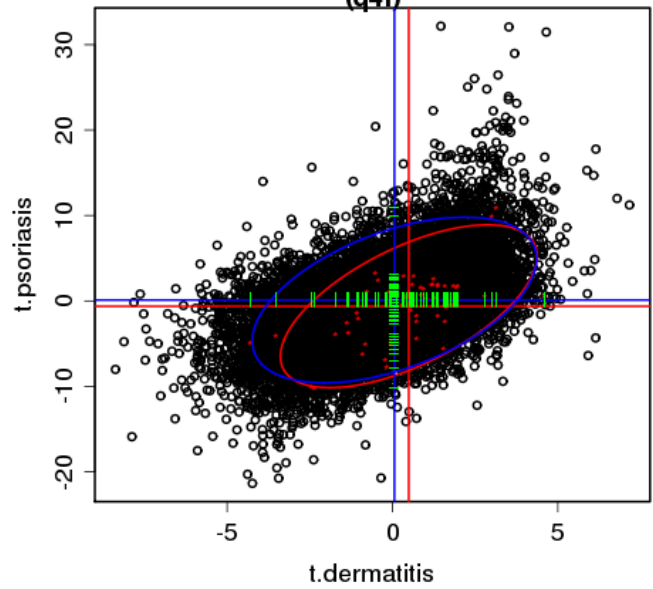

**GO:0006817**  
**phosphate transport**  
**(q4f)**

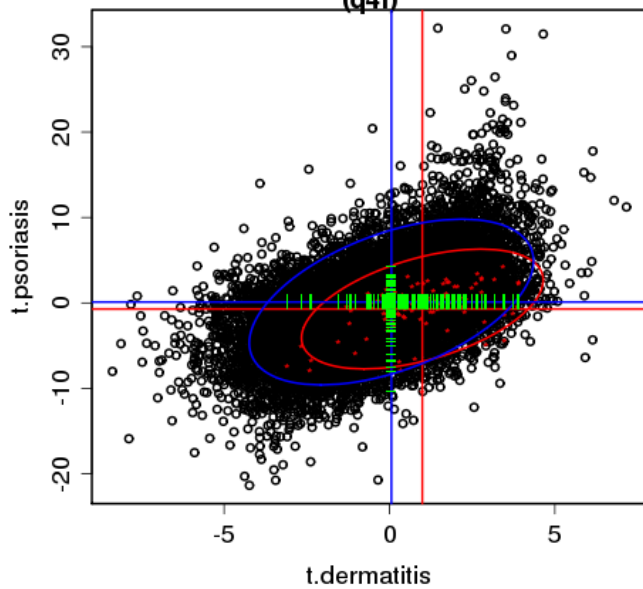

**GO:0032963**  
**collagen metabolic process**  
**(q4f)**

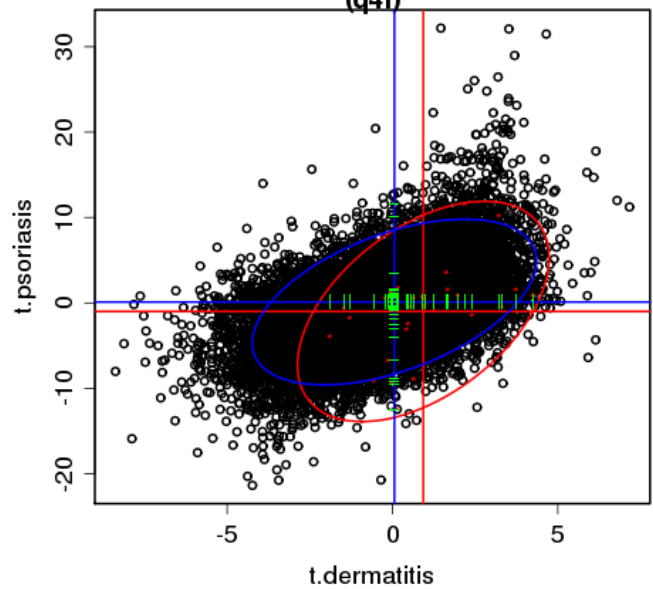



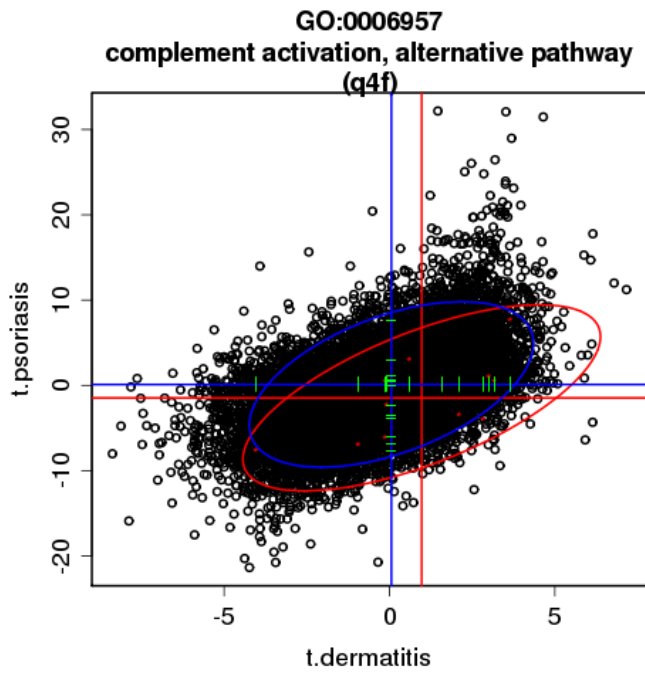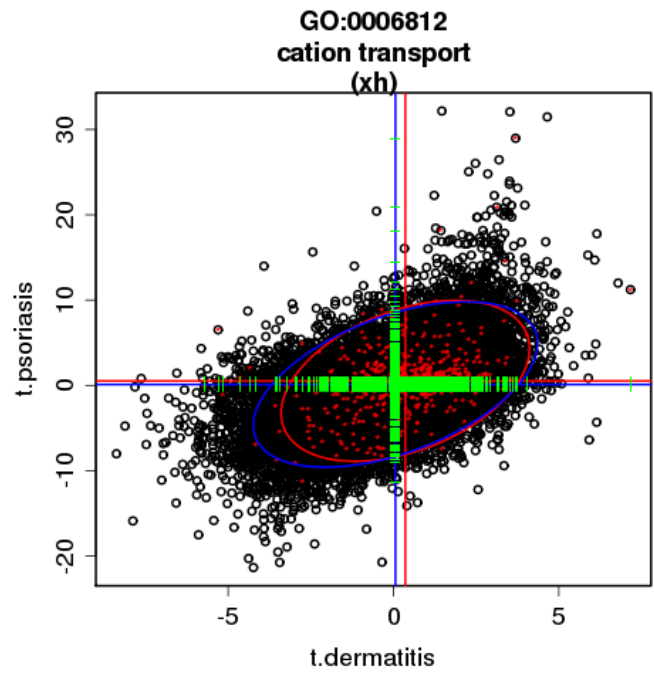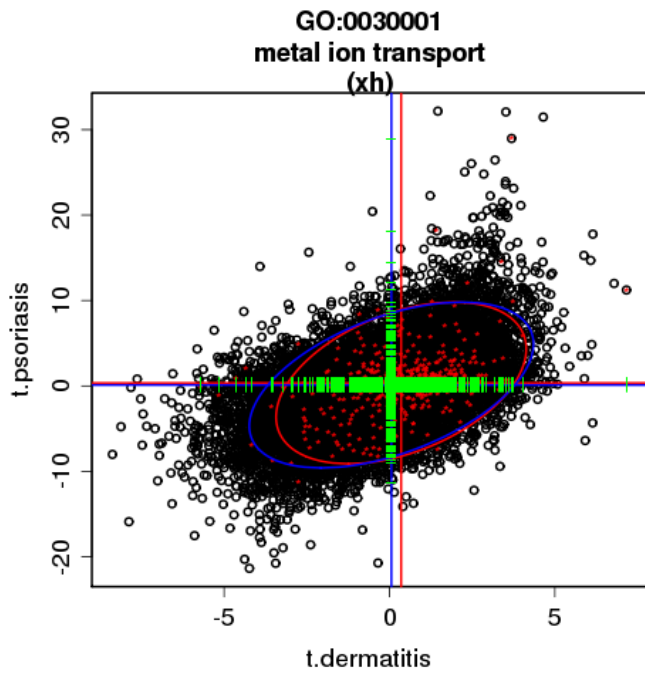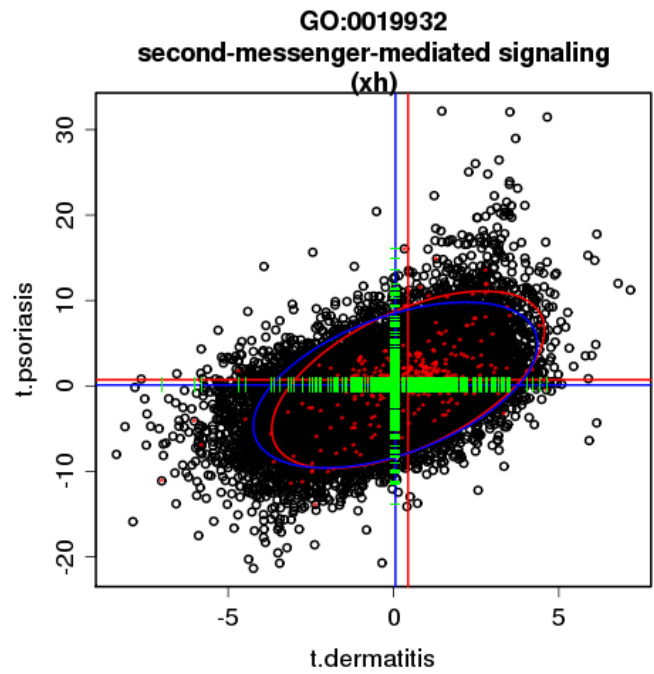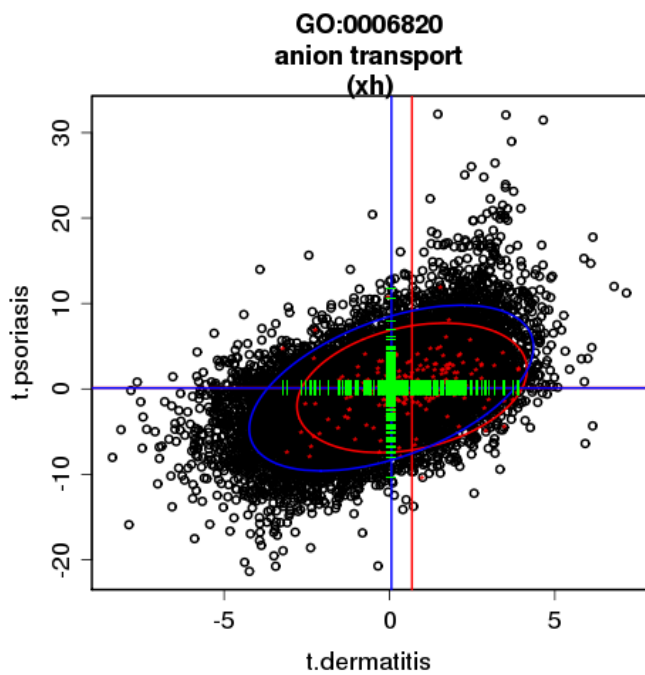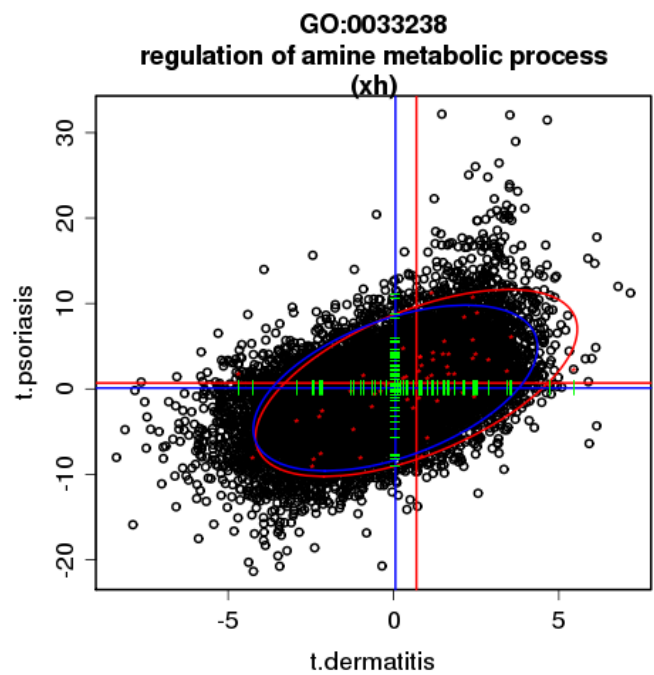

GO:0001932

regulation of protein amino acid phosphorylation  
(xh)

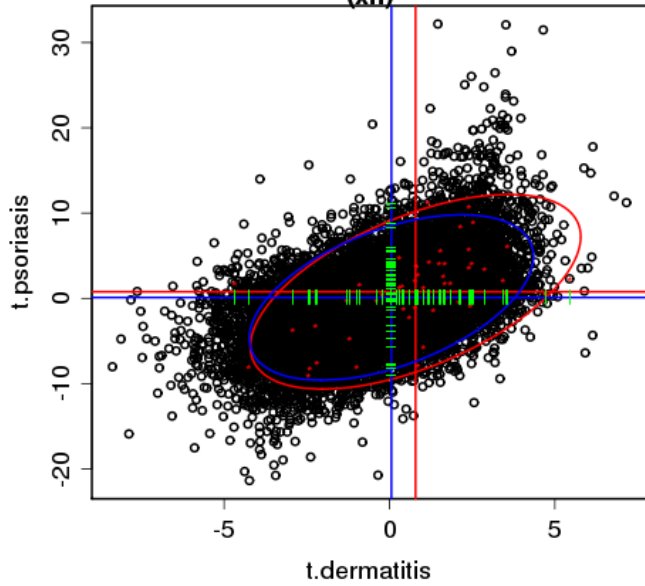

GO:0031401

positive regulation of protein modification process  
(xh)

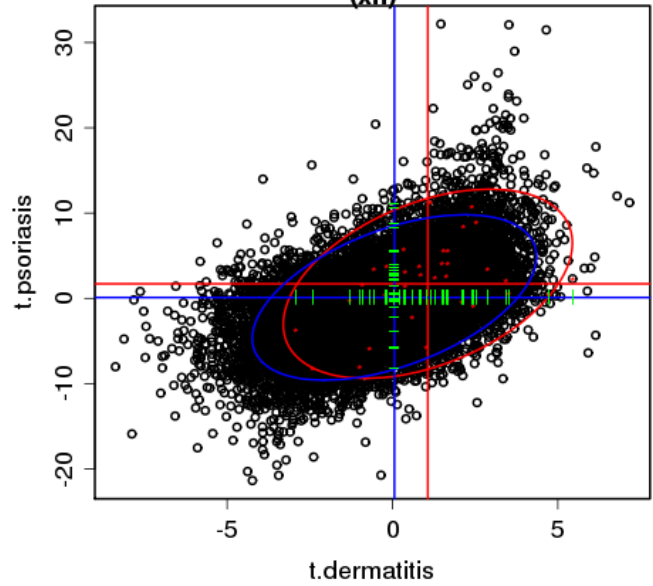

GO:0006521

regulation of amino acid metabolic process  
(xh)

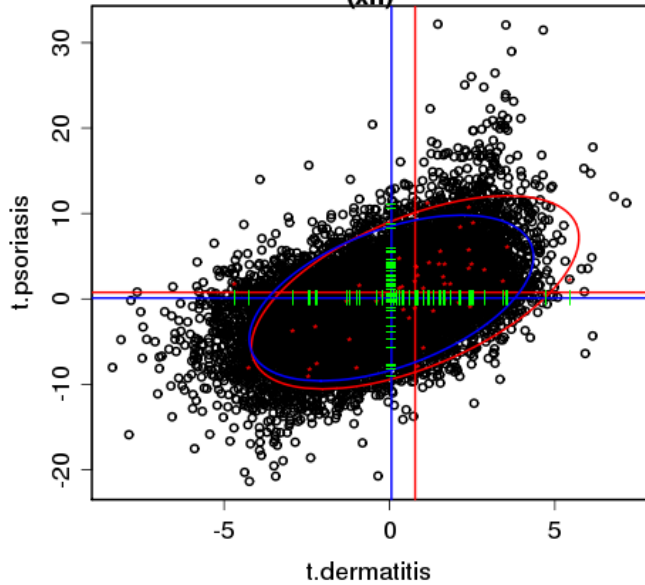

GO:0033240

positive regulation of amine metabolic process  
(xh)

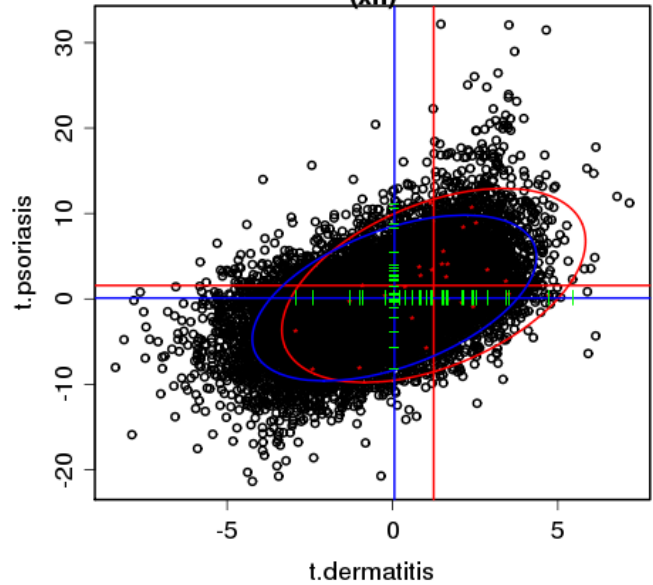

GO:0001934

positive regulation of protein amino acid phosphorylation  
(xh)

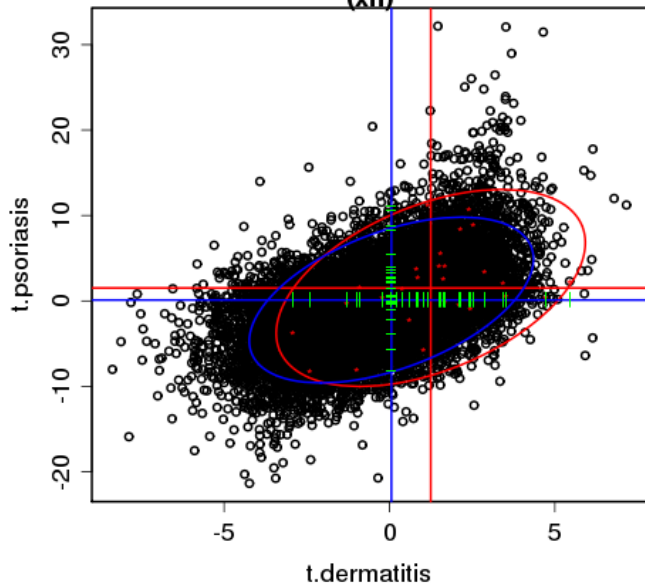

GO:0050730

regulation of peptidyl-tyrosine phosphorylation  
(xh)

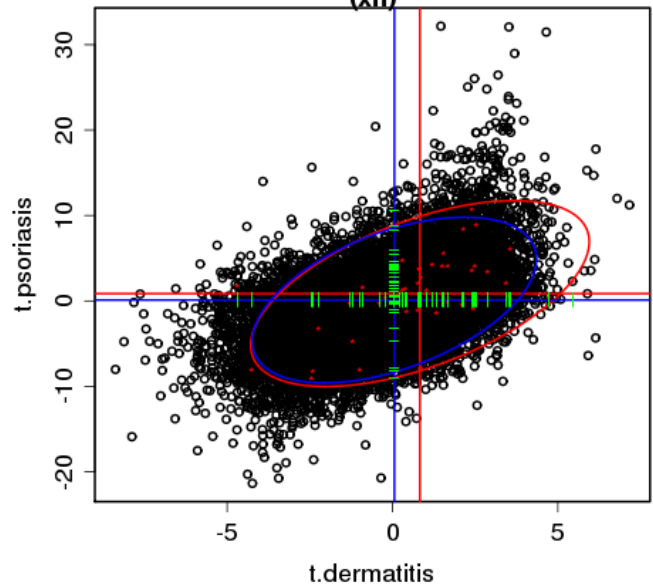

GO:0045764

positive regulation of amino acid metabolic process  
(xh)

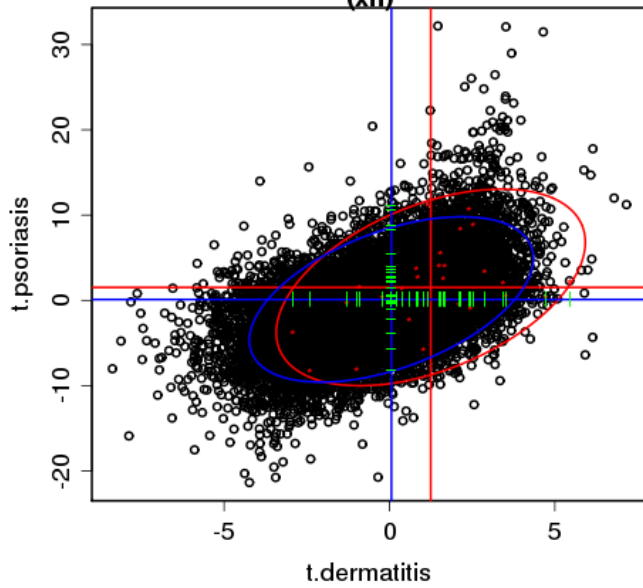

GO:0050731

positive regulation of peptidyl-tyrosine phosphorylation  
(xh)

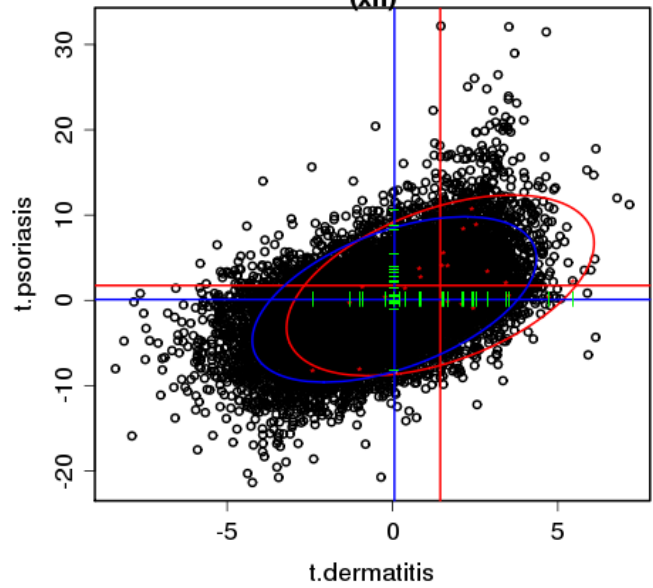

GO:0002682

regulation of immune system process  
(xh)

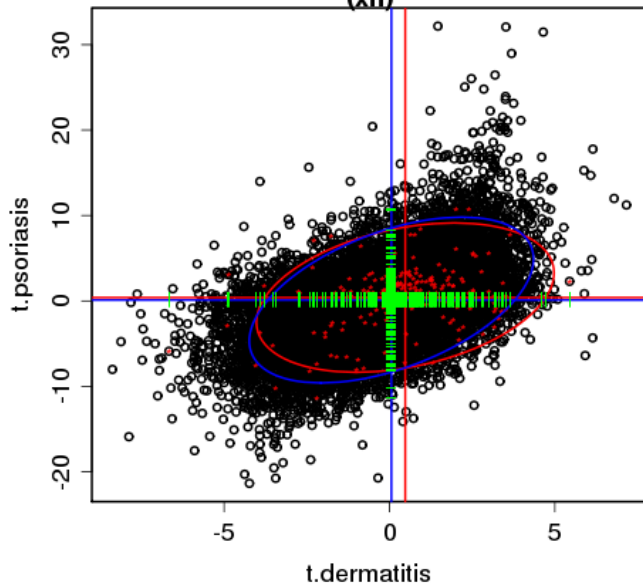

GO:0002684

positive regulation of immune system process  
(xh)

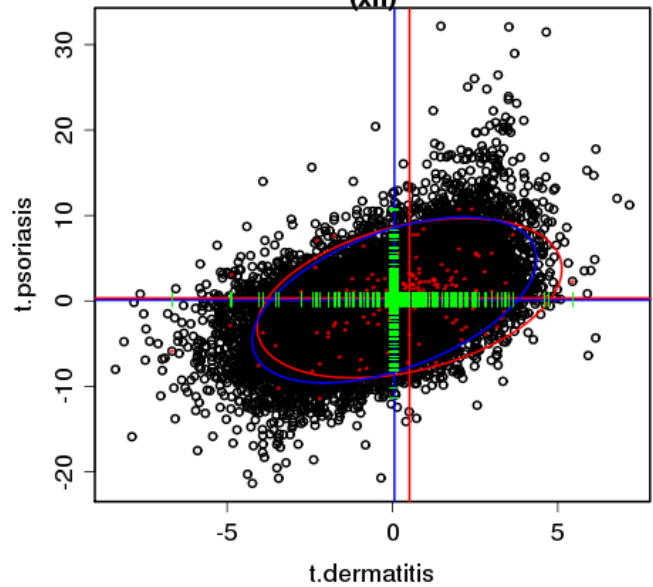

GO:0048583

regulation of response to stimulus  
(xh)

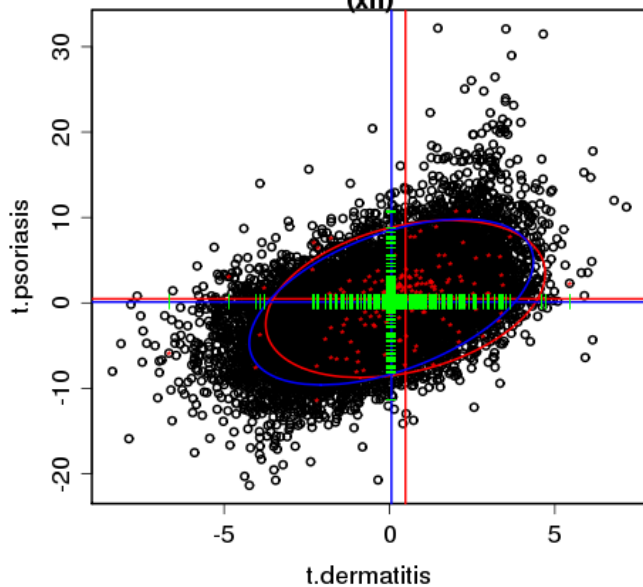

GO:0048584

positive regulation of response to stimulus  
(xh)

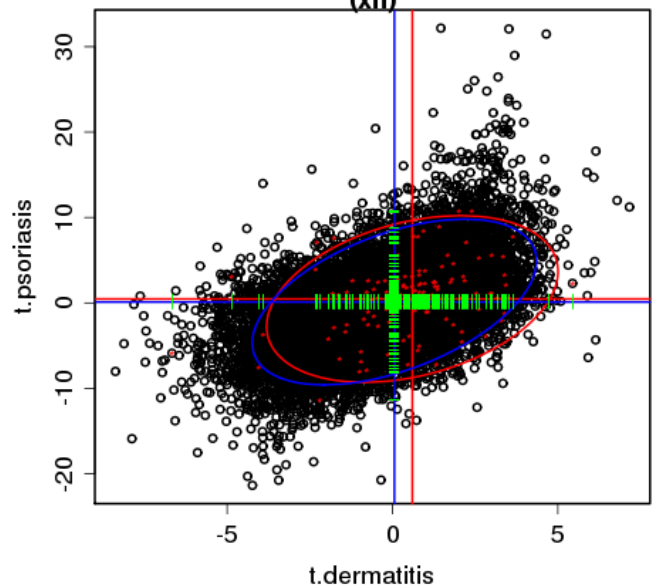

GO:0051240  
positive regulation of multicellular organismal processes (xh)

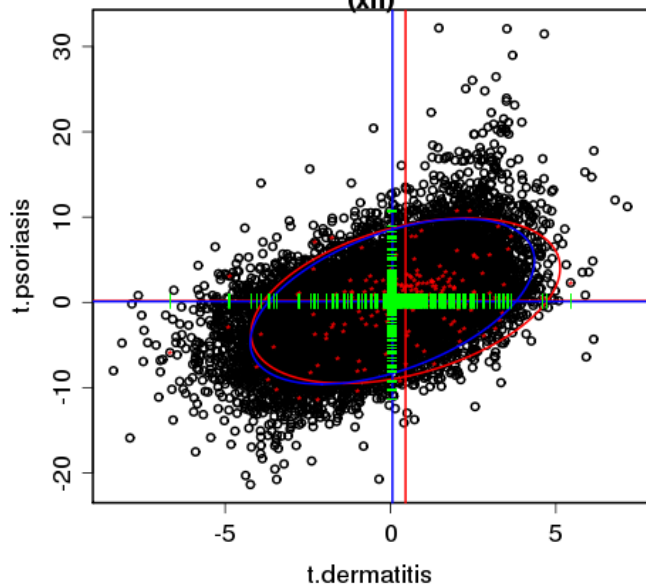

GO:0002694  
regulation of leukocyte activation (xh)

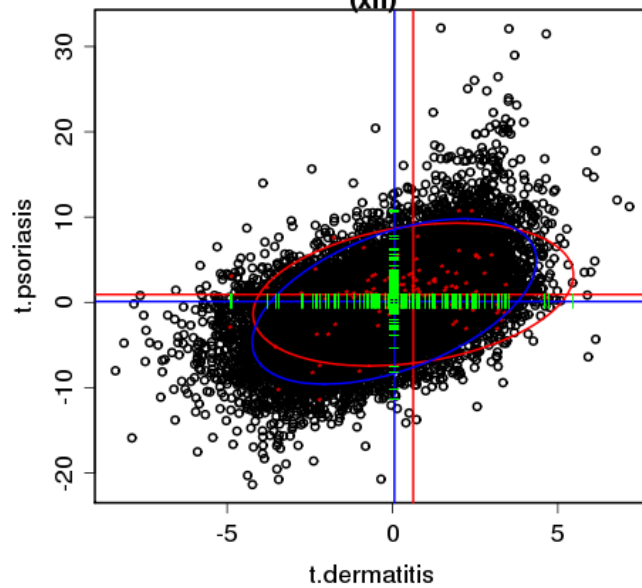

GO:0050865  
regulation of cell activation (xh)

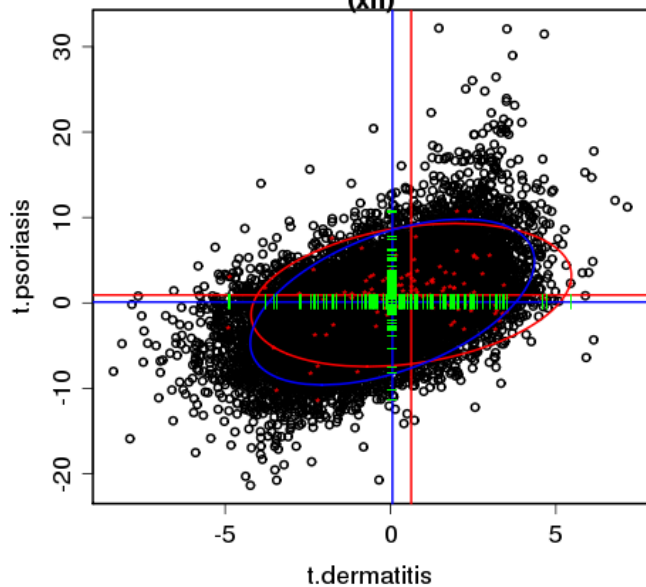

GO:0051241  
negative regulation of multicellular organismal processes (xh)

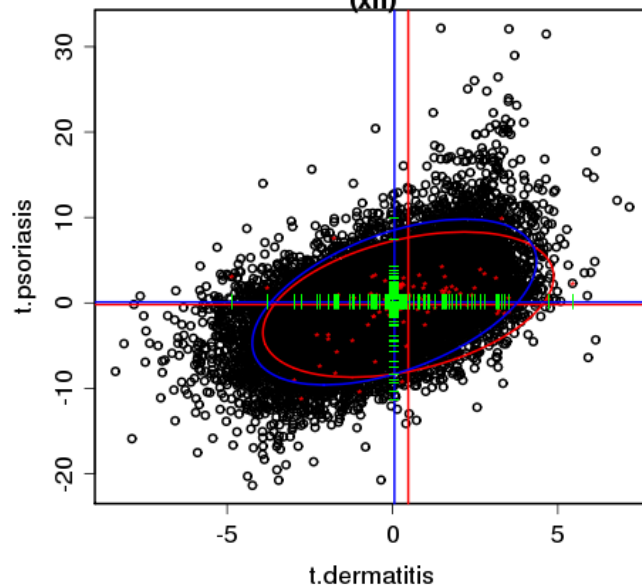

GO:0051249  
regulation of lymphocyte activation (xh)

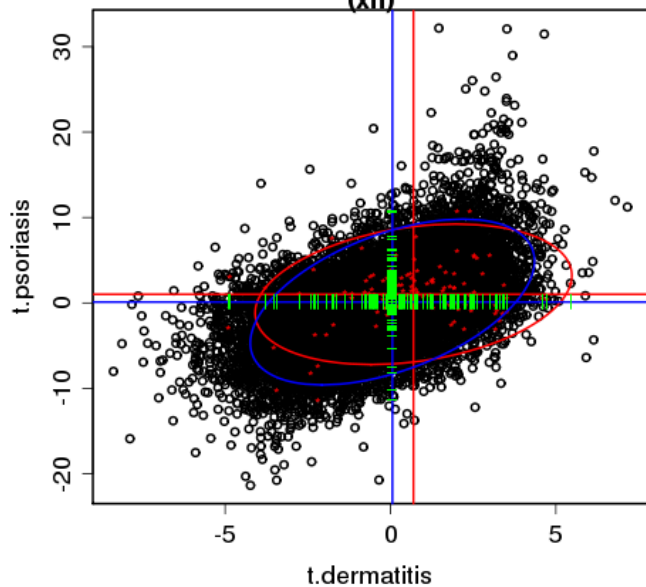

GO:0050878  
regulation of body fluid levels (xh)

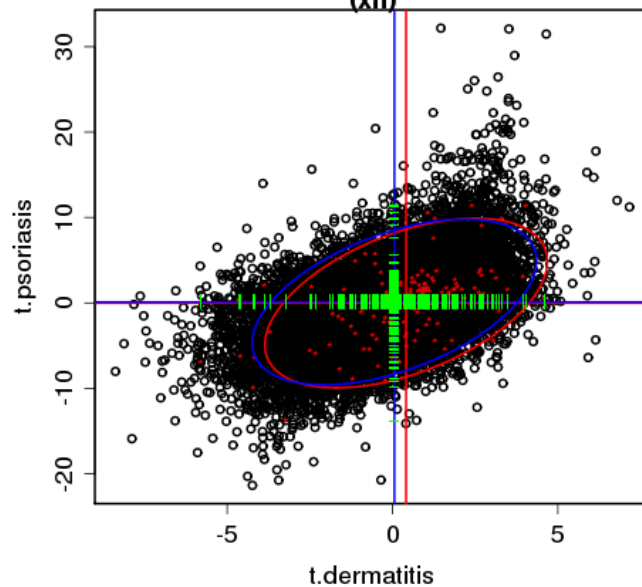

GO:0007599  
hemostasis  
(xh)

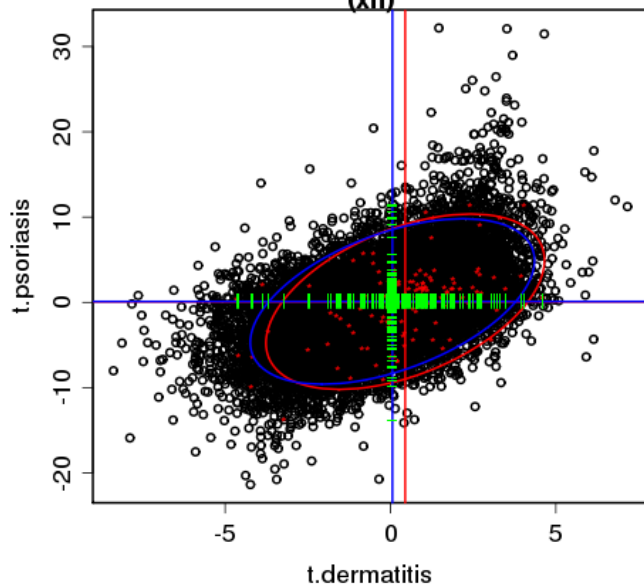

GO:0009611  
response to wounding  
(xh)

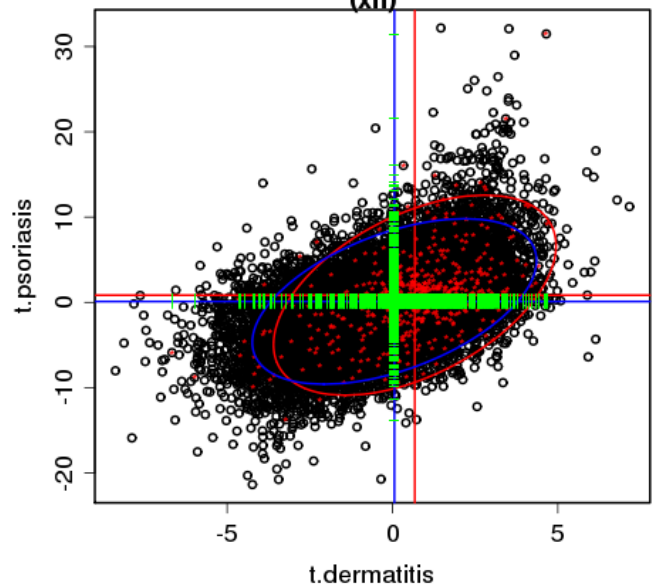

GO:0050817  
coagulation  
(xh)

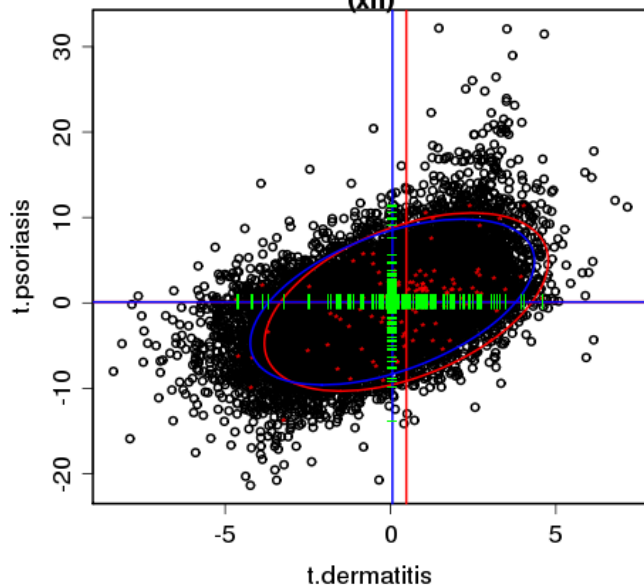

GO:0006959  
humoral immune response  
(xh)

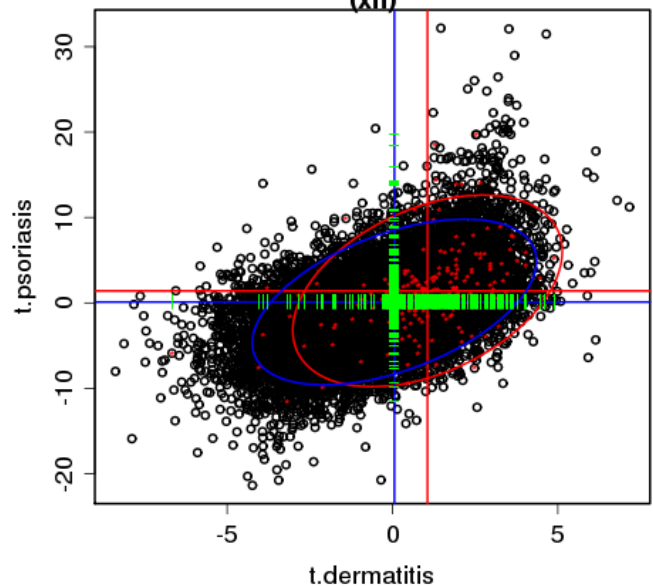

GO:0051707  
response to other organism  
(xh)

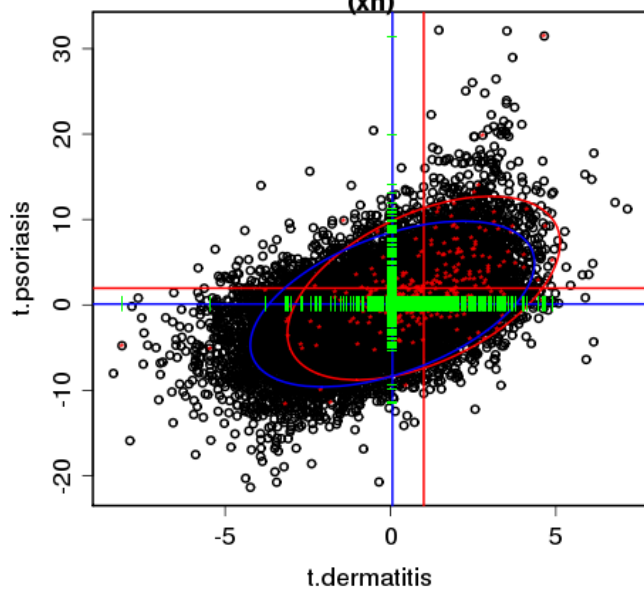

GO:0007596  
blood coagulation  
(xh)

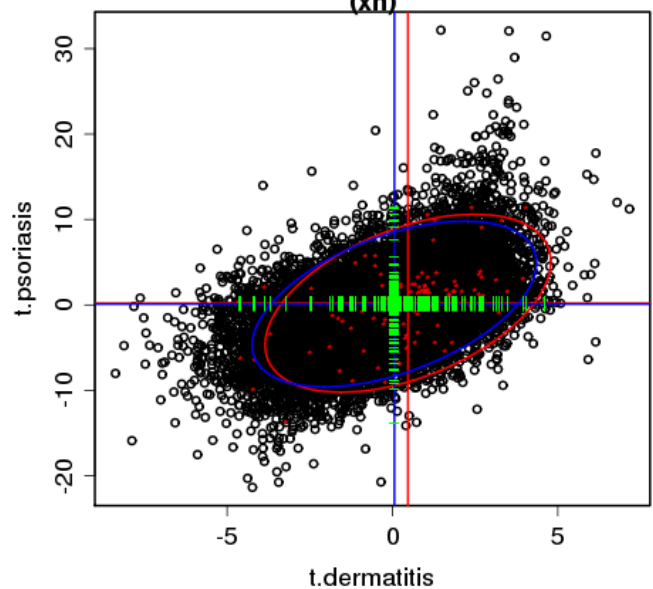



GO:0019730  
antimicrobial humoral response  
(xh)

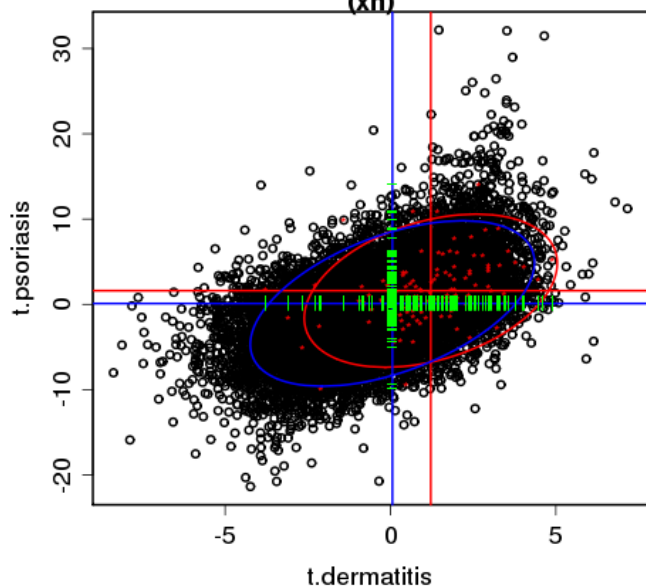

GO:0007610  
behavior  
(xh)

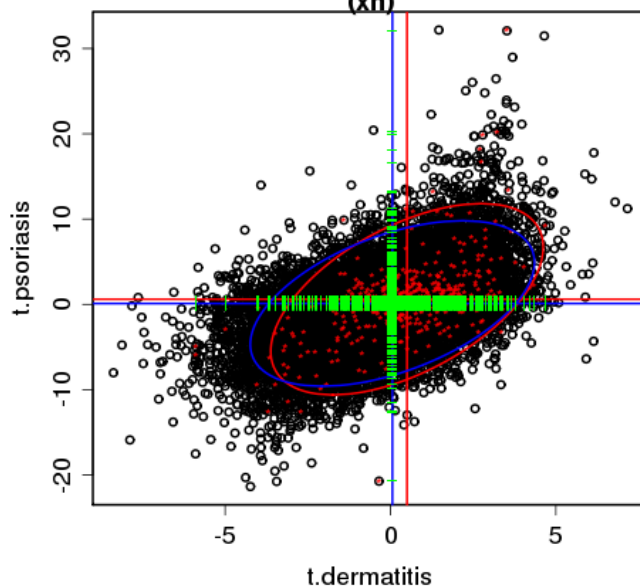

GO:0007626  
locomotory behavior  
(xh)

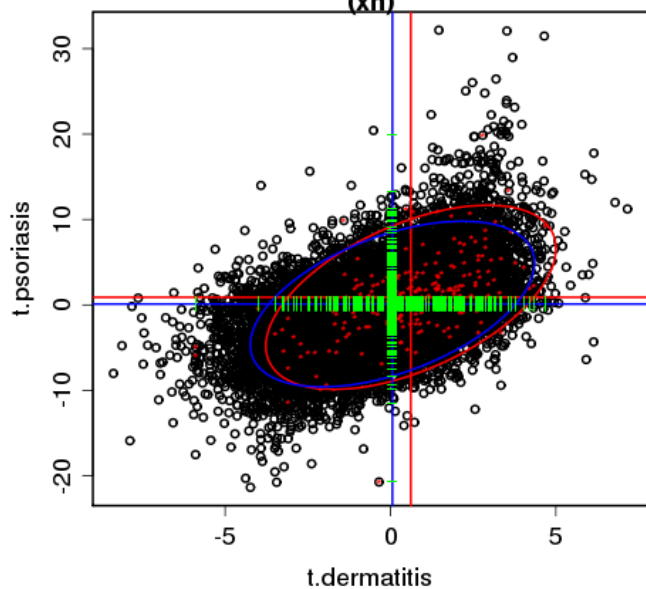

GO:0042330  
taxis  
(xh)

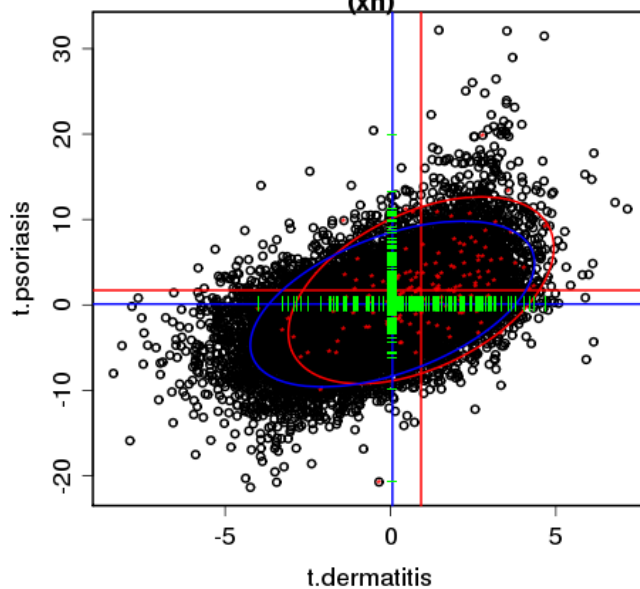

GO:0002250  
adaptive immune response  
(xh)

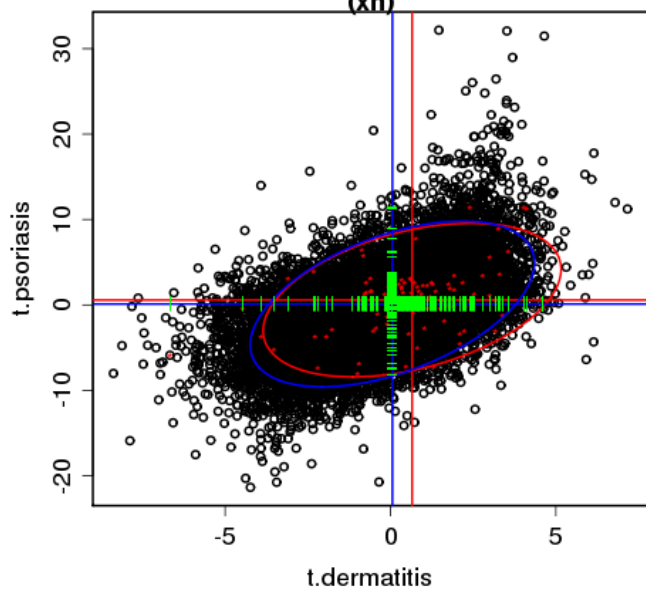

GO:0002252  
immune effector process  
(xh)

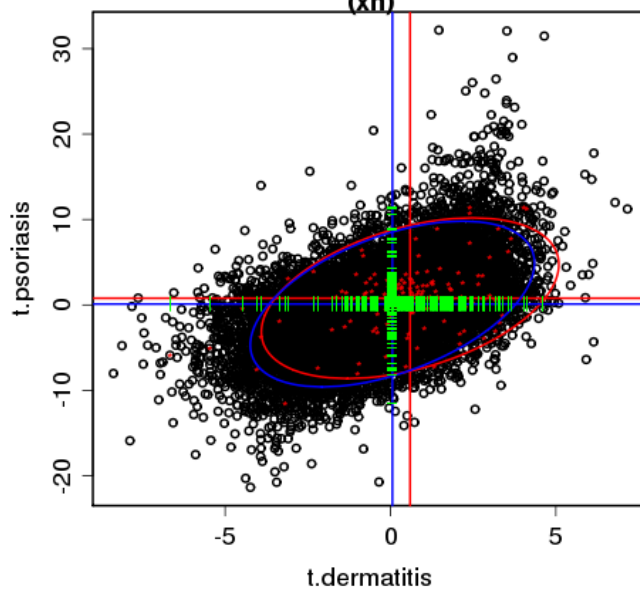

GO:0002443  
leukocyte mediated immunity  
(xh)

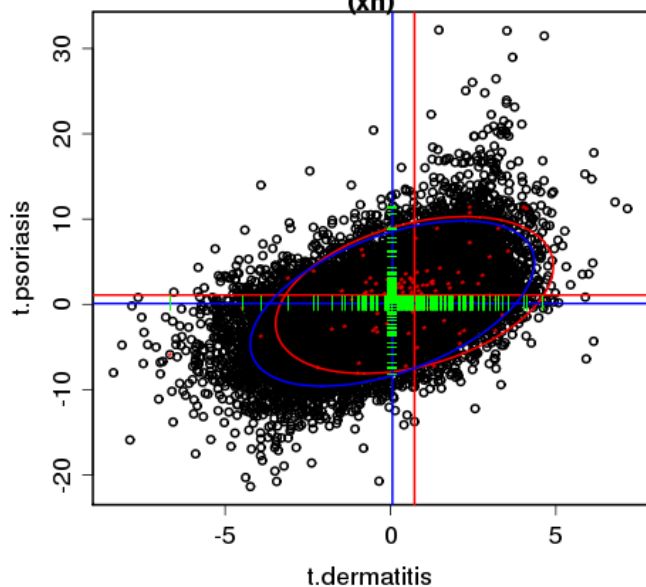

GO:0002449  
lymphocyte mediated immunity  
(xh)

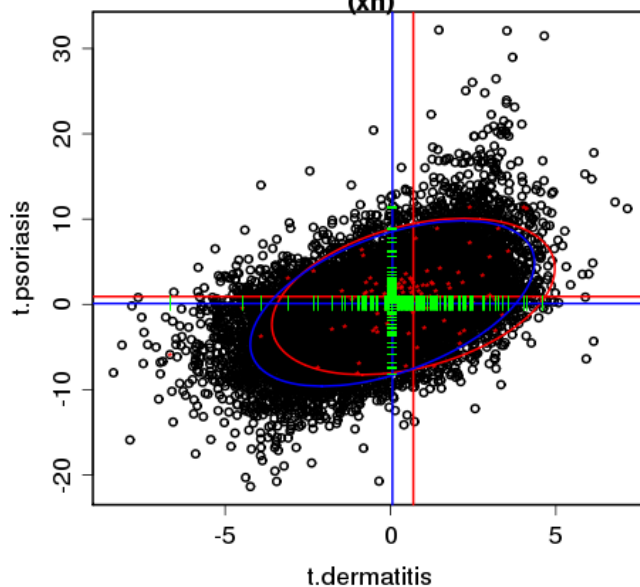

GO:0002460  
n somatic recombination of immune receptors built from  
(xh)



GO:0016064  
immunoglobulin mediated immune response  
(xh)

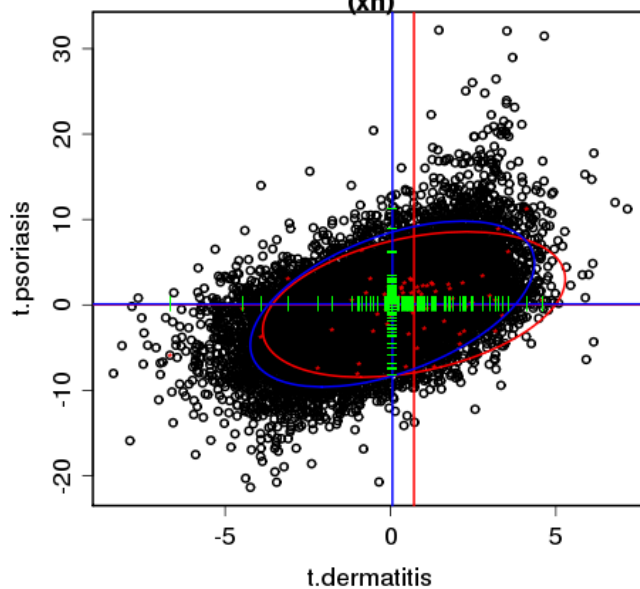

GO:0019724  
B cell mediated immunity  
(xh)

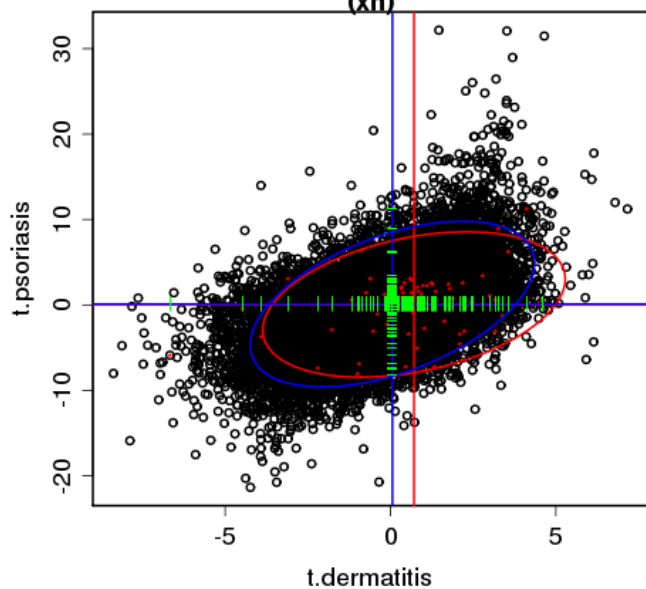

GO:0002696  
positive regulation of leukocyte activation  
(xh)

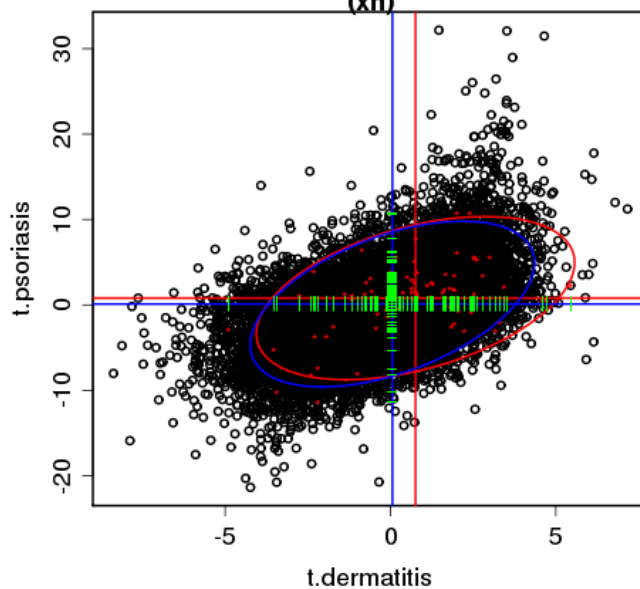

GO:0045191  
regulation of isotype switching  
(xh)

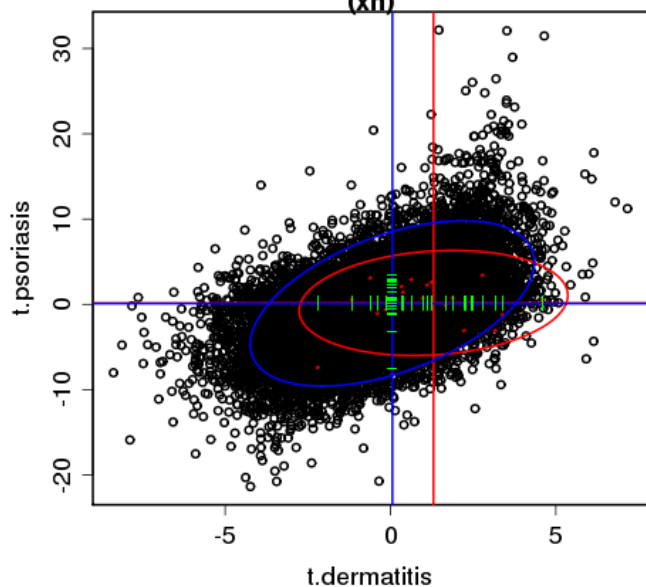

GO:0045830  
positive regulation of isotype switching  
(xh)

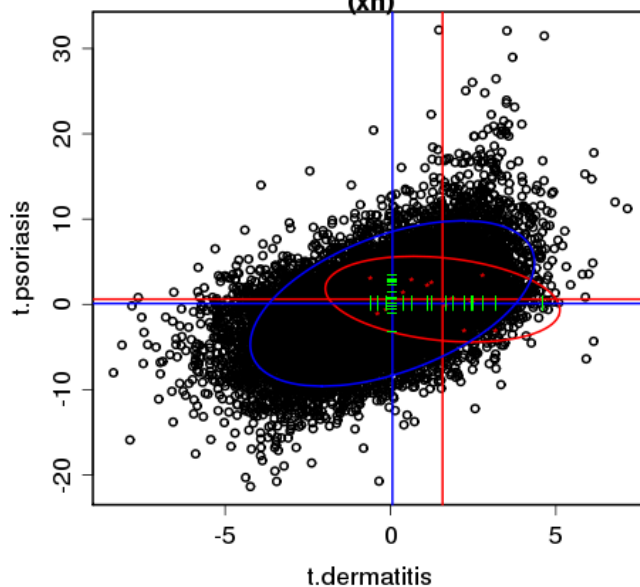

GO:0045911  
positive regulation of DNA recombination  
(xh)

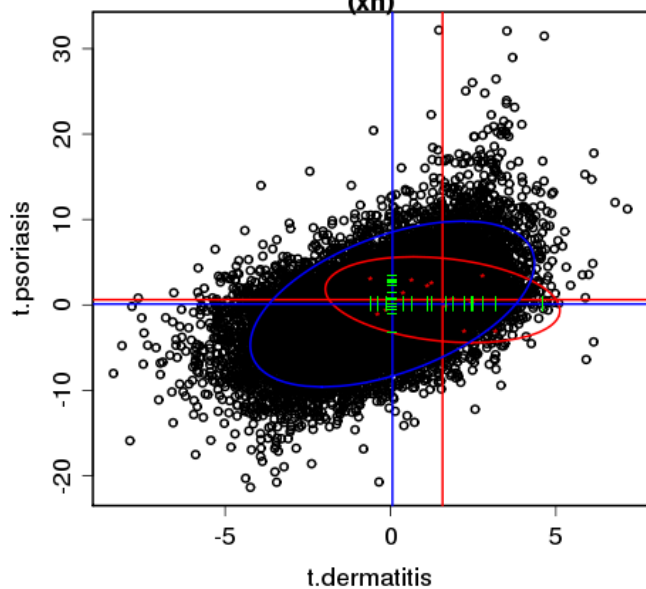

GO:0048291  
isotype switching to IgG isotypes  
(xh)

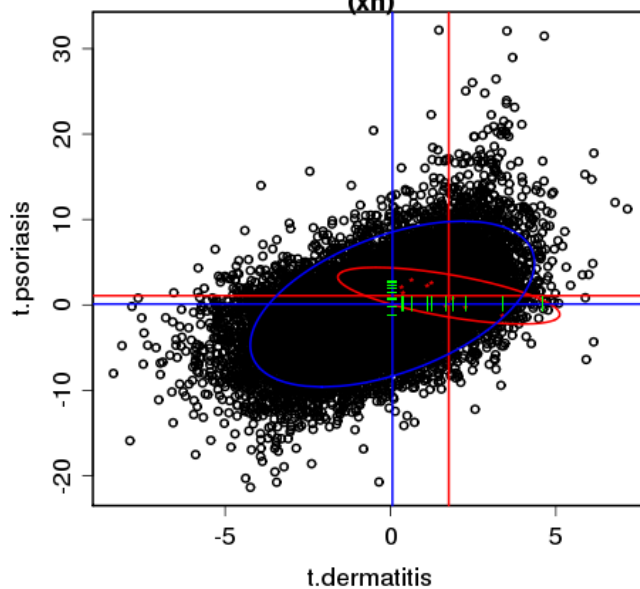

GO:0048302  
regulation of isotype switching to IgG isotypes  
(xh)

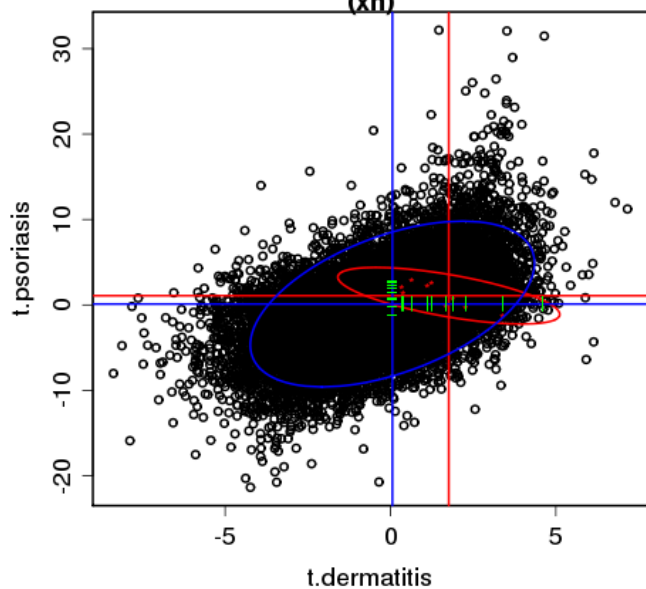

GO:0050867  
positive regulation of cell activation  
(xh)





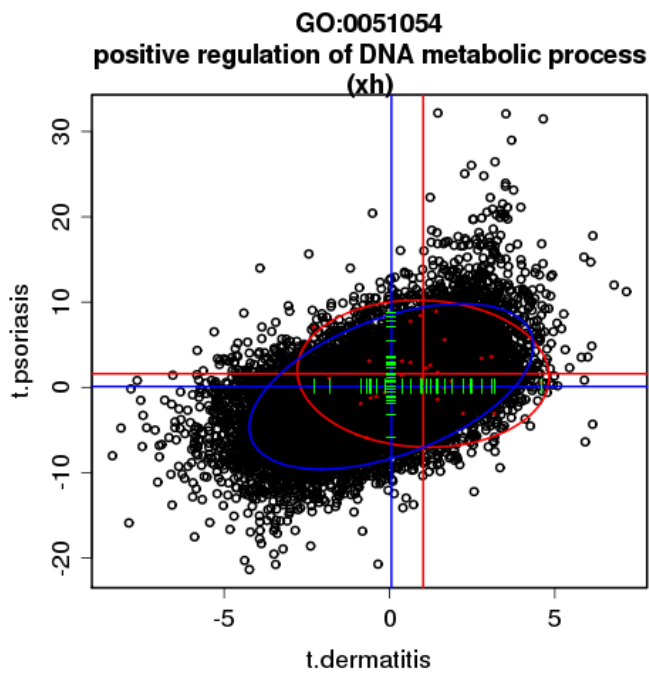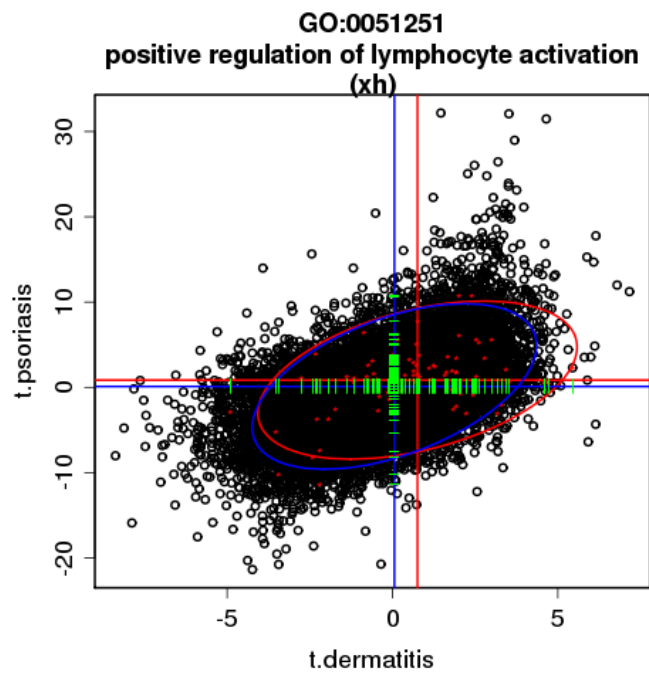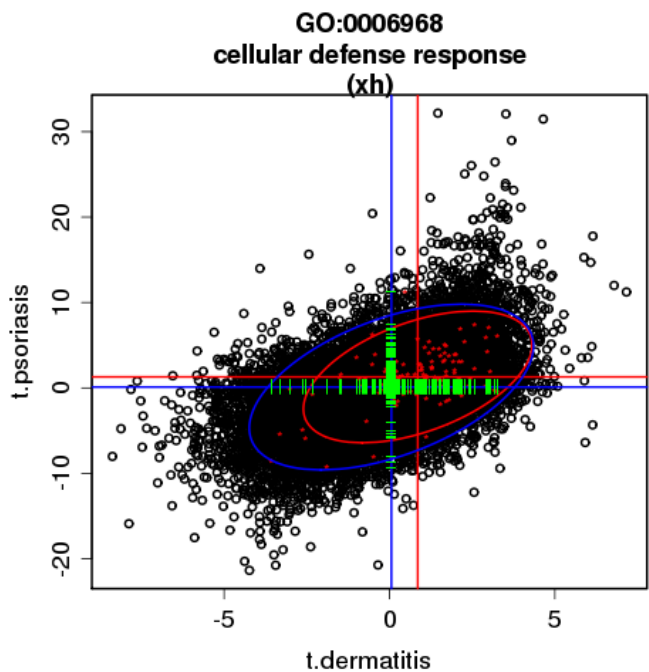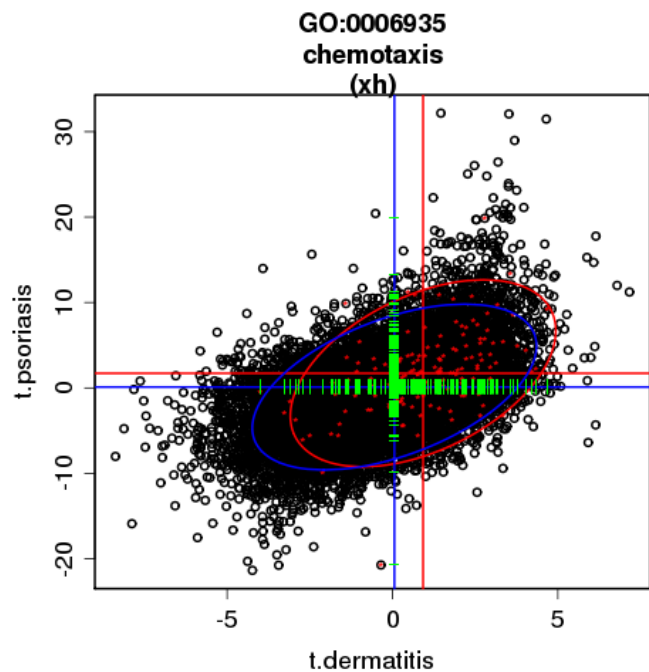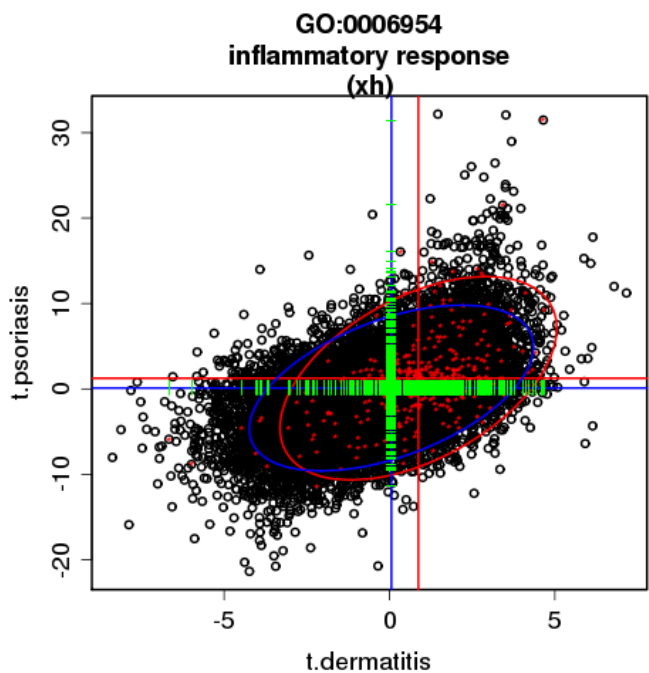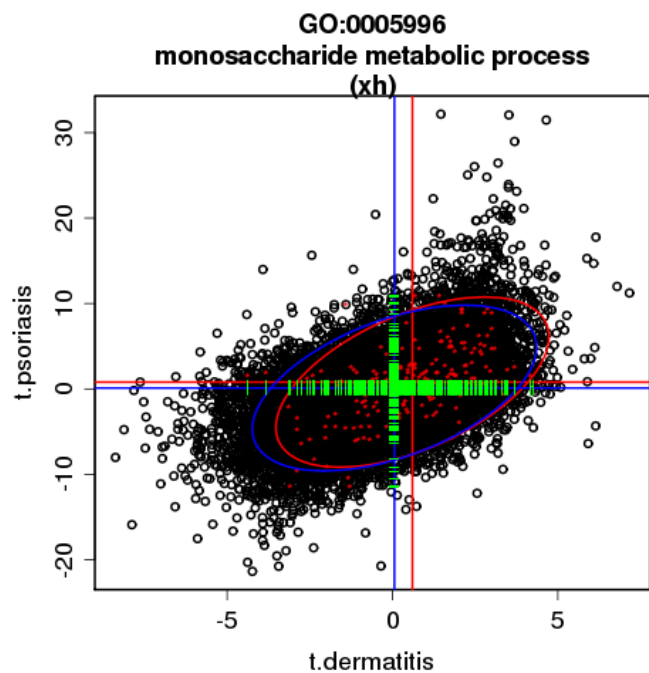

GO:0044262  
cellular carbohydrate metabolic process  
(xh)

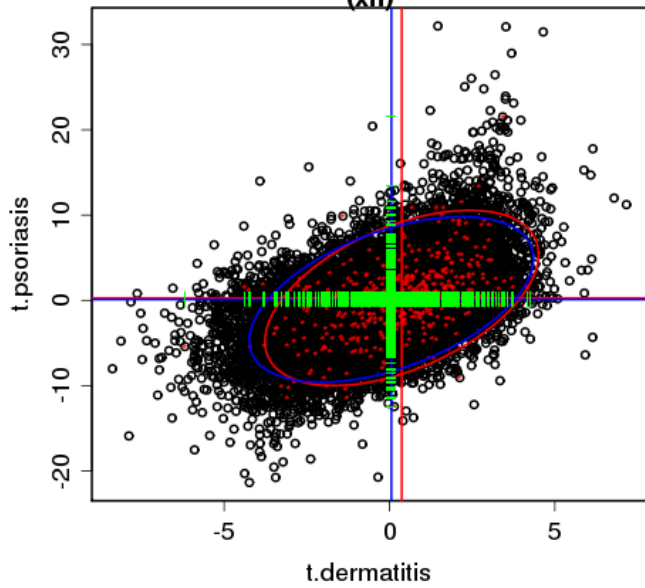

GO:0015980  
energy derivation by oxidation of organic compounds  
(xh)

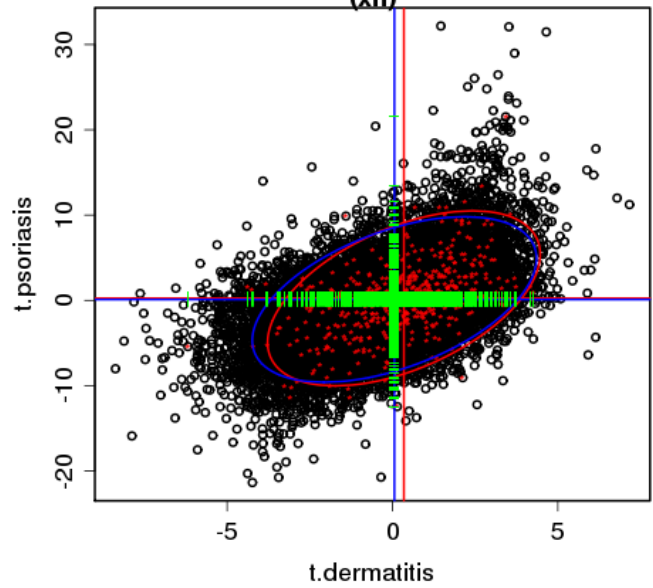

GO:0019318  
hexose metabolic process  
(xh)

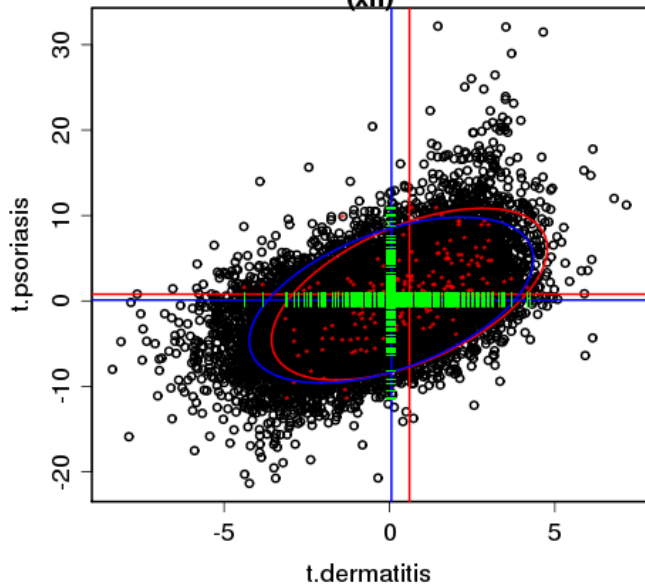

GO:0006006  
glucose metabolic process  
(xh)

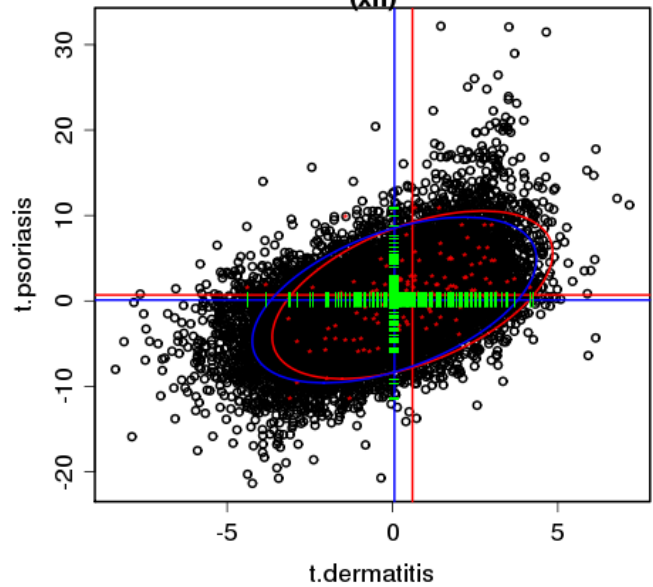

GO:0030003  
cellular cation homeostasis  
(xh)

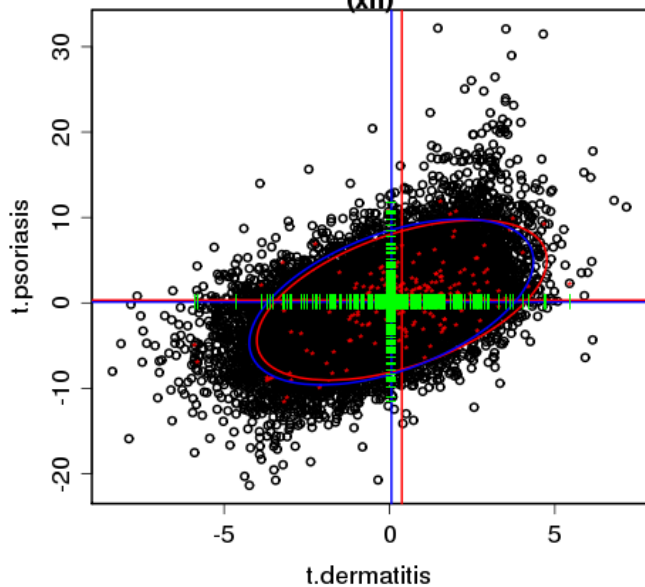

GO:0055065  
metal ion homeostasis  
(xh)

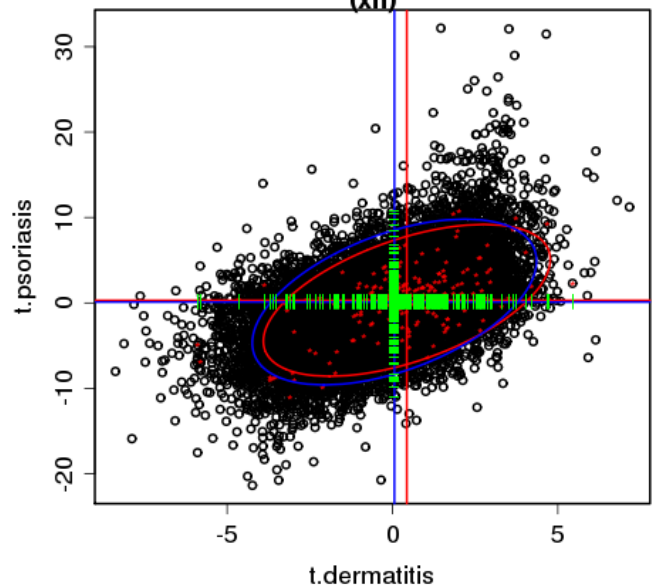

GO:0055080  
cation homeostasis  
(xh)

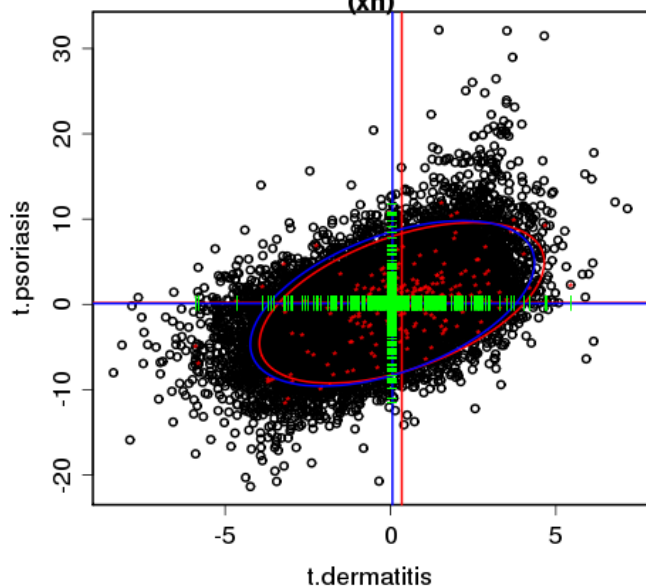

GO:0006875  
cellular metal ion homeostasis  
(xh)

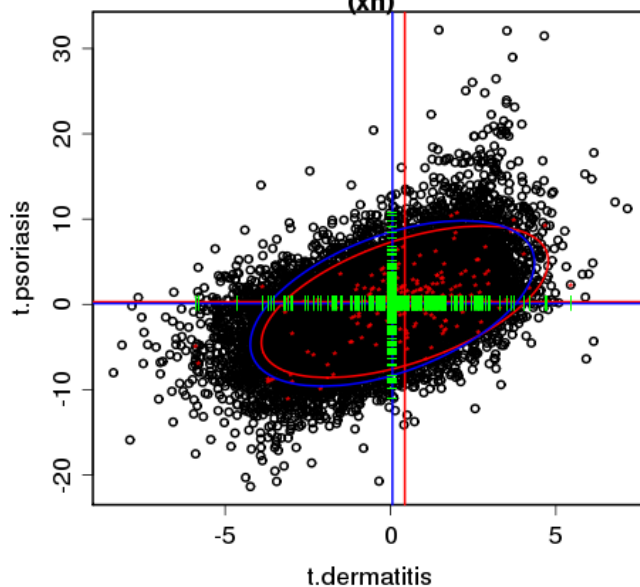

GO:0030005  
cellular di-, tri-valent inorganic cation homeostasis  
(xh)

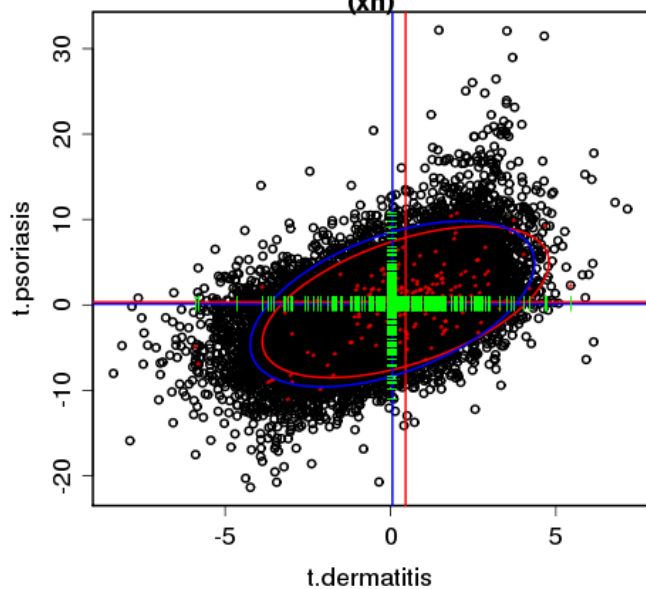

GO:0055066  
di-, tri-valent inorganic cation homeostasis  
(xh)

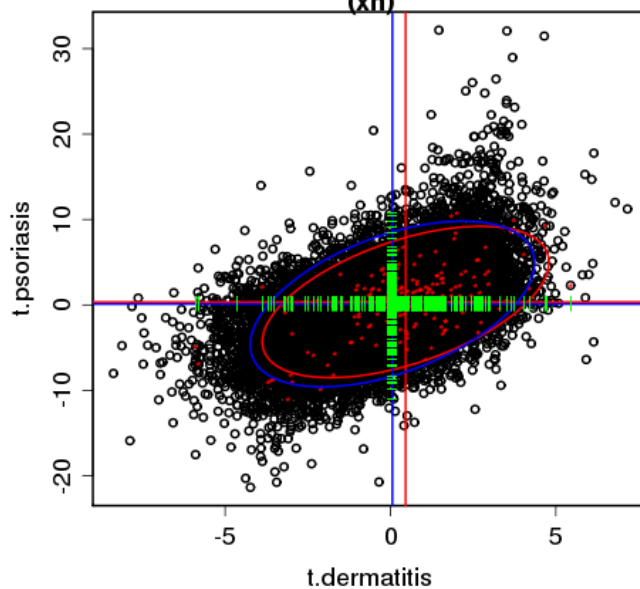

GO:0055074  
calcium ion homeostasis  
(xh)

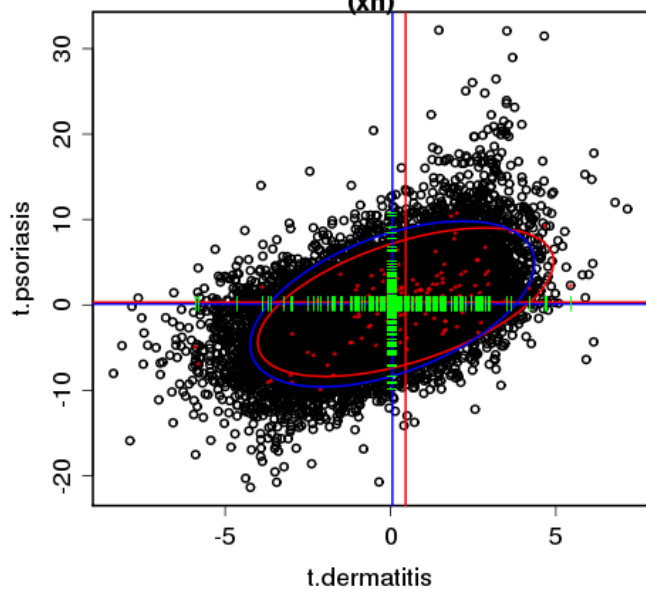

GO:0006874  
cellular calcium ion homeostasis  
(xh)

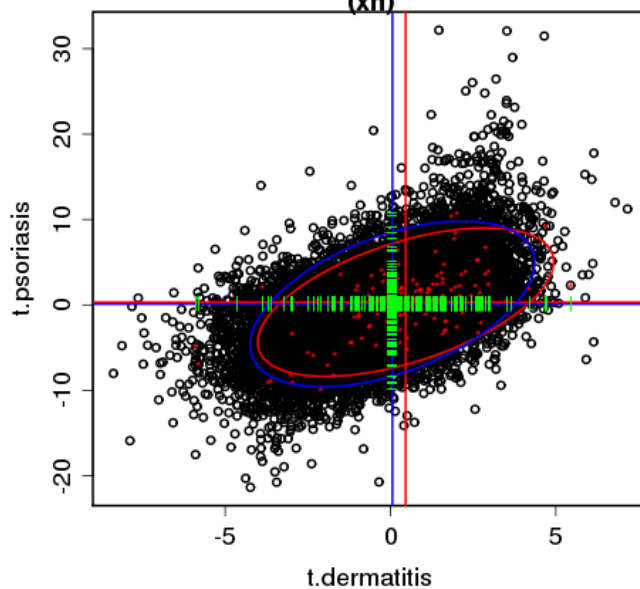

GO:0045214  
sarcomere organization  
(xh)

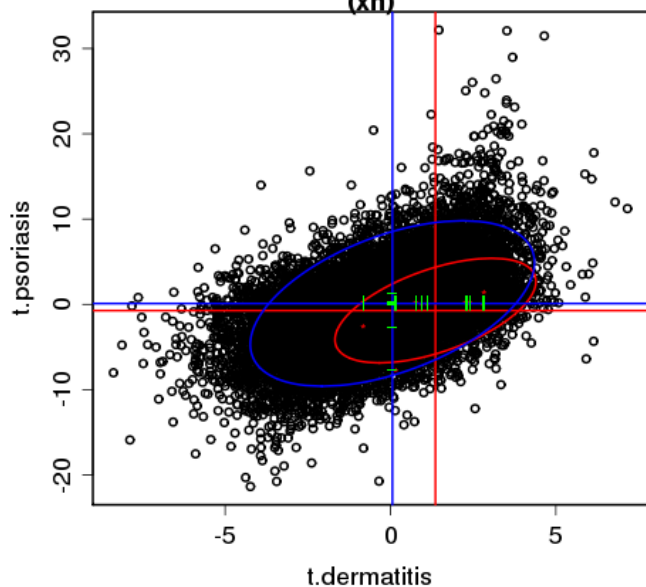

GO:0048646  
anatomical structure formation  
(xh)

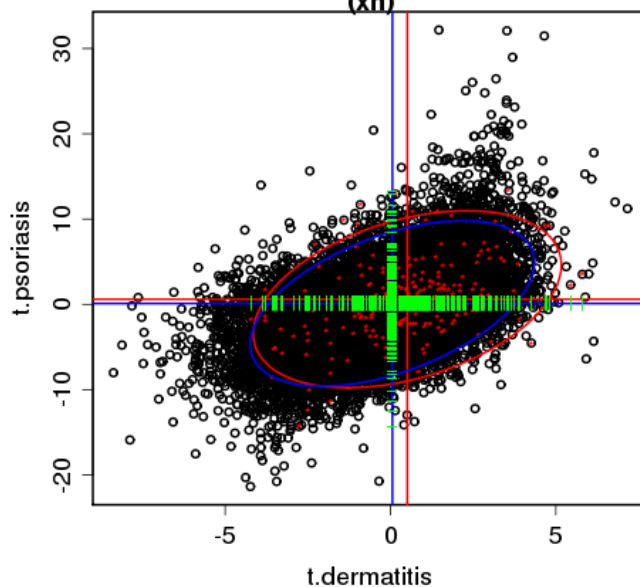

GO:0007160  
cell-matrix adhesion  
(xh)

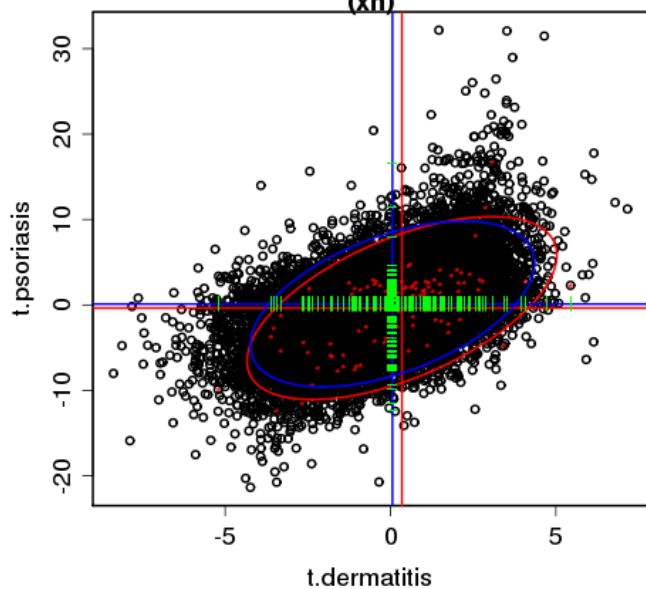

GO:0051480  
cytosolic calcium ion homeostasis  
(xh)

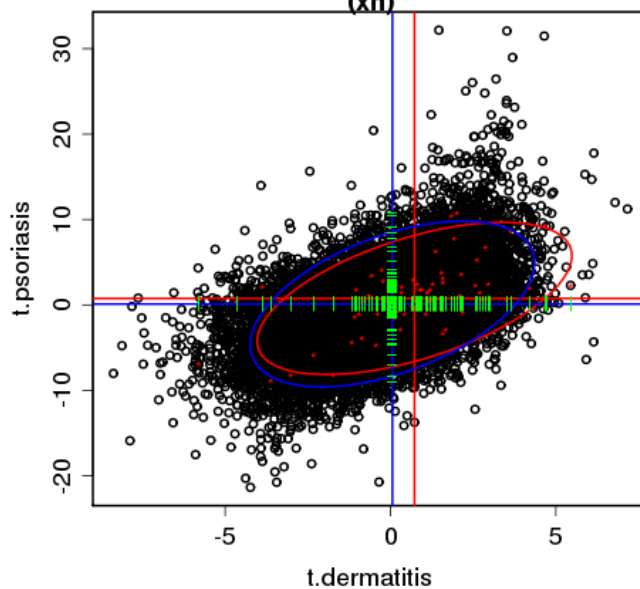

GO:0007204  
elevation of cytosolic calcium ion concentration  
(xh)

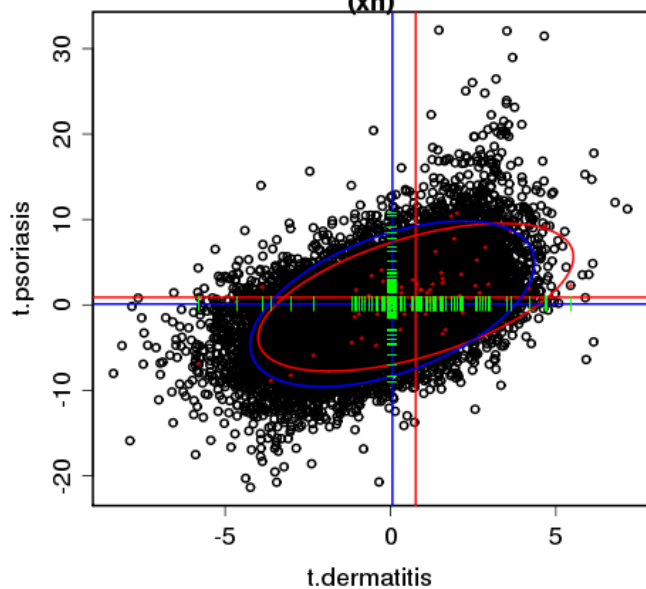

GO:0032103  
positive regulation of response to external stimulus  
(xh)

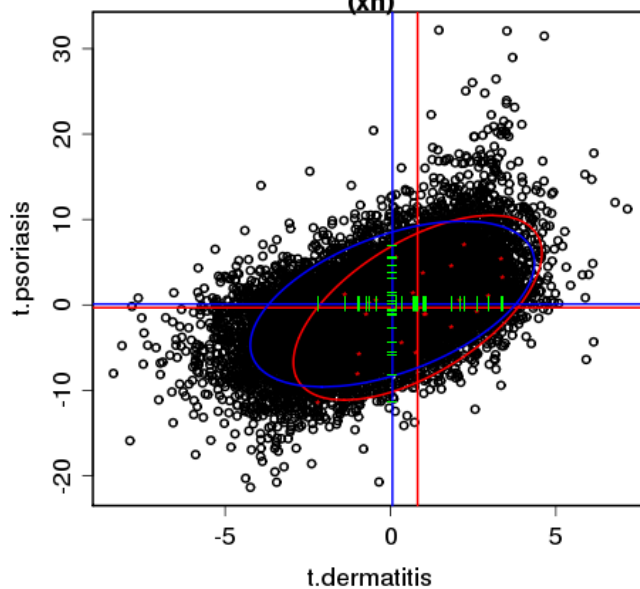

GO:0050920  
regulation of chemotaxis  
(xh)

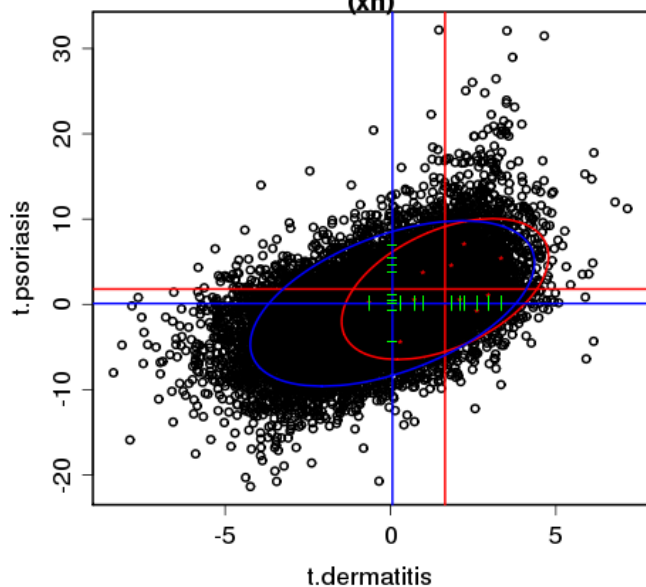

GO:0006897  
endocytosis  
(xh)

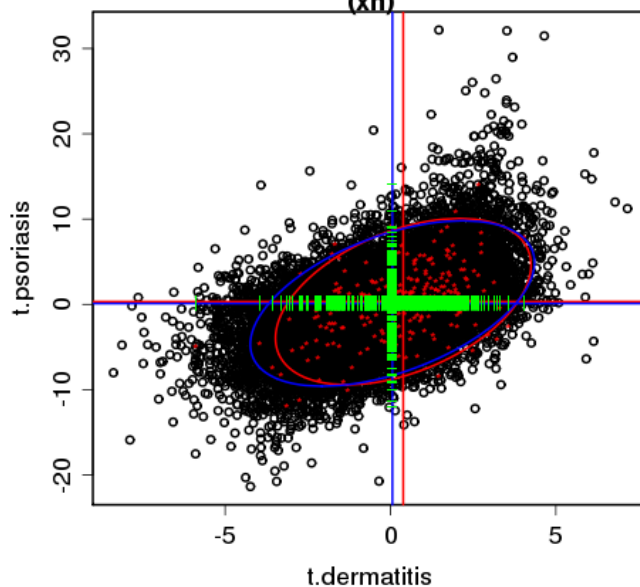

GO:0010324  
membrane invagination  
(xh)

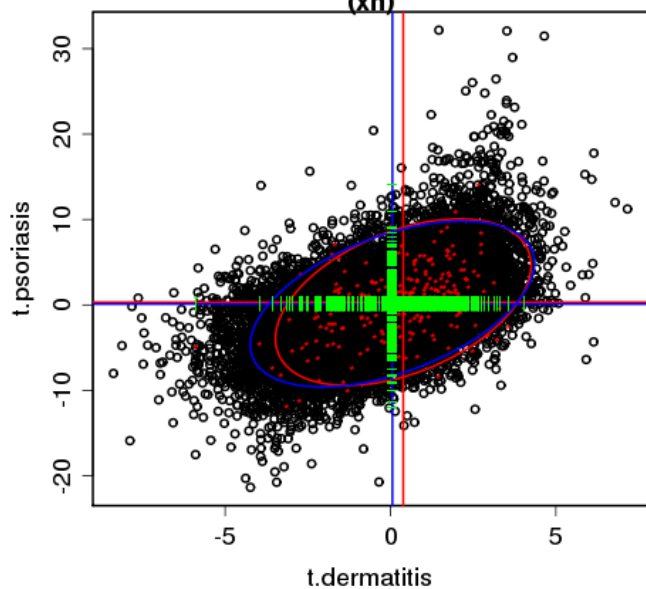

GO:0019935  
cyclic-nucleotide-mediated signaling  
(xh)

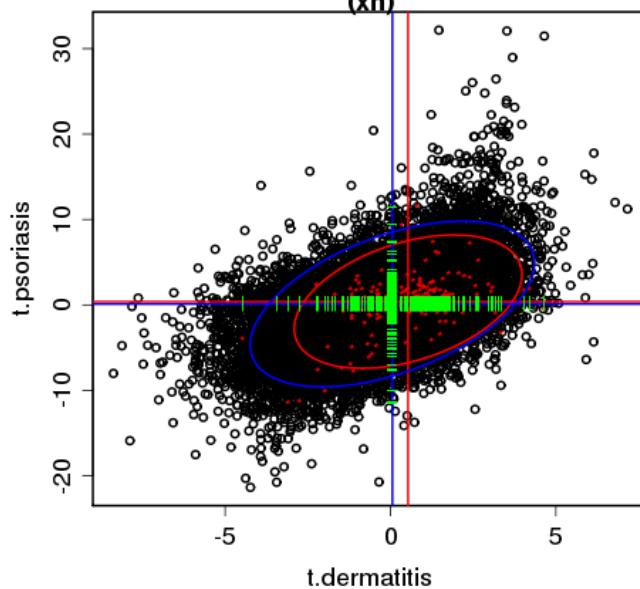

GO:0007187  
protein signaling, coupled to cyclic nucleotide second messenger  
(xh)

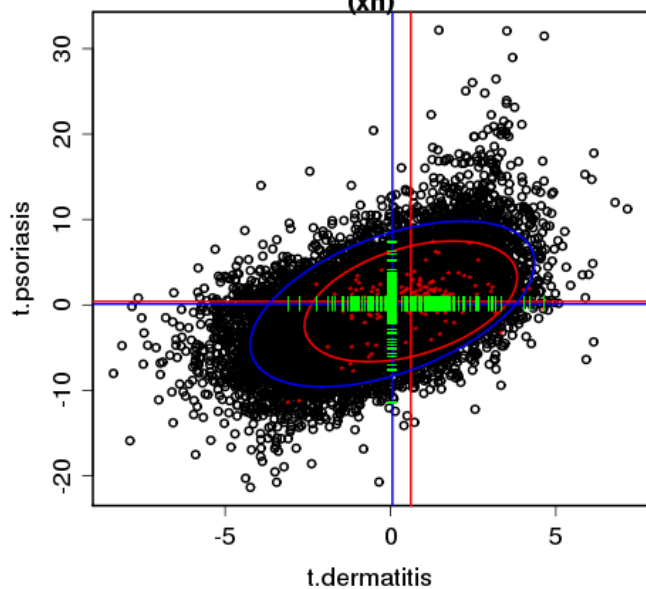

GO:0007188  
protein signaling, coupled to cAMP nucleotide second messenger  
(xh)

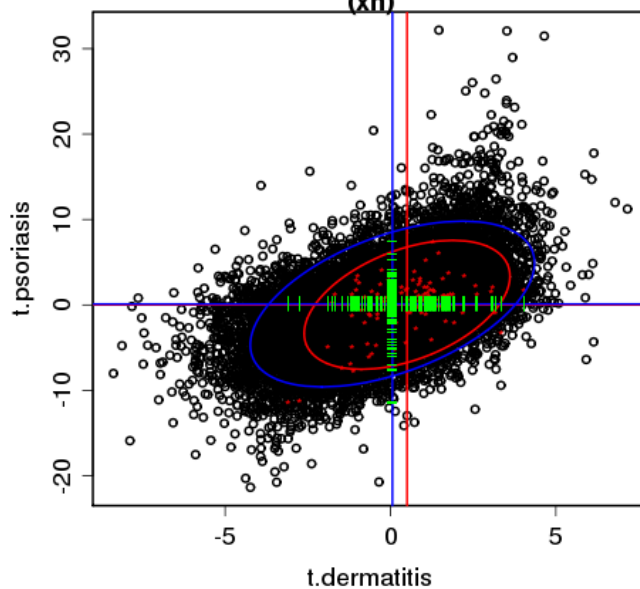

GO:0002526  
acute inflammatory response  
(xh)

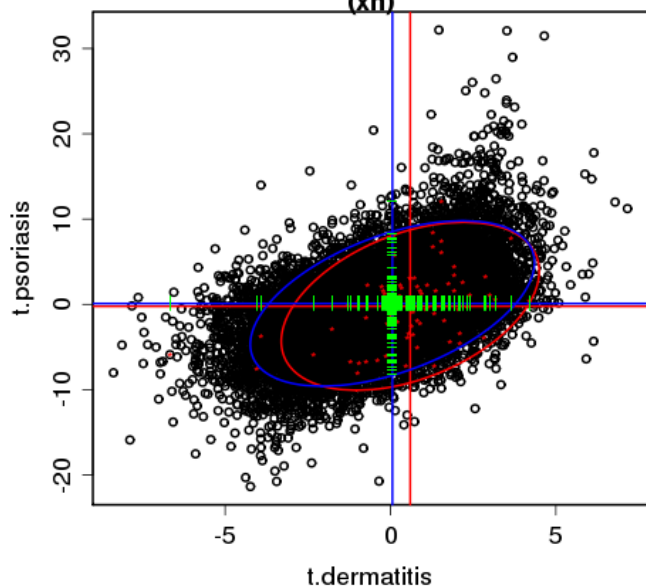

GO:0015672  
monovalent inorganic cation transport  
(xh)

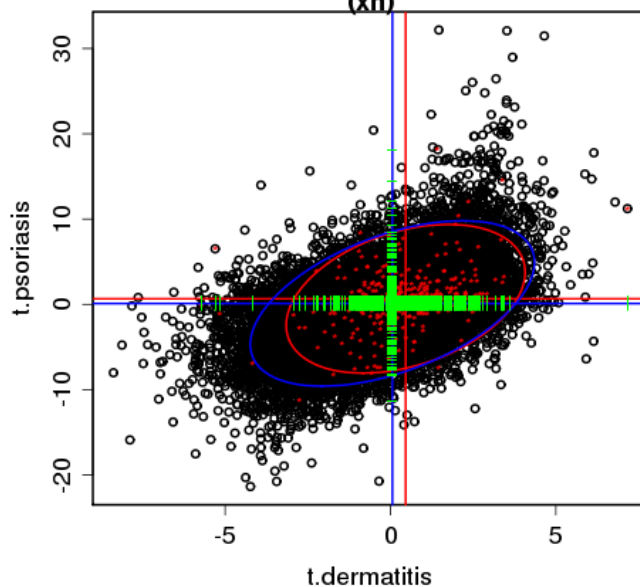

GO:0006813  
potassium ion transport  
(xh)

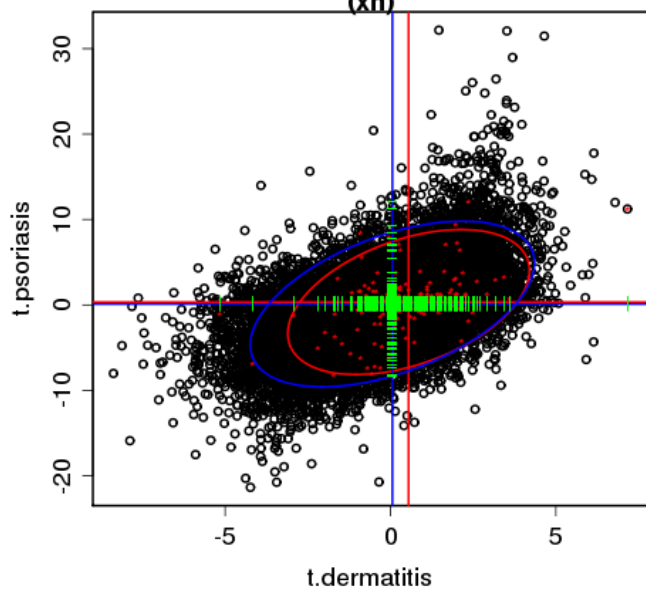

GO:0051346  
negative regulation of hydrolase activity  
(xh)

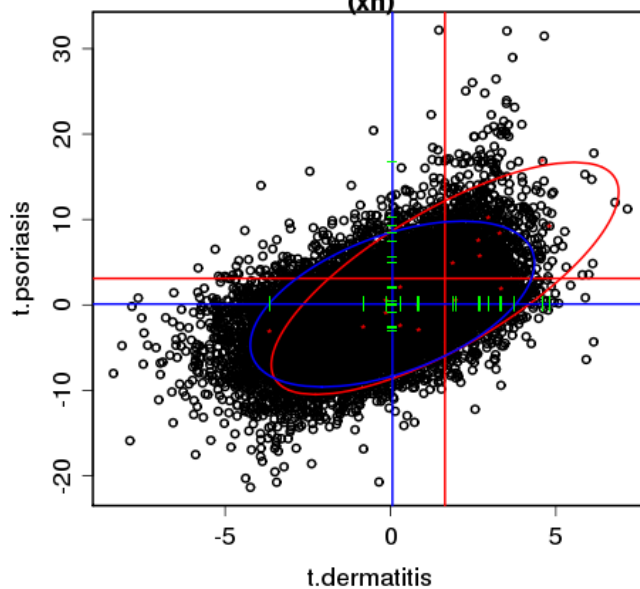

GO:0019882  
antigen processing and presentation  
(xh)

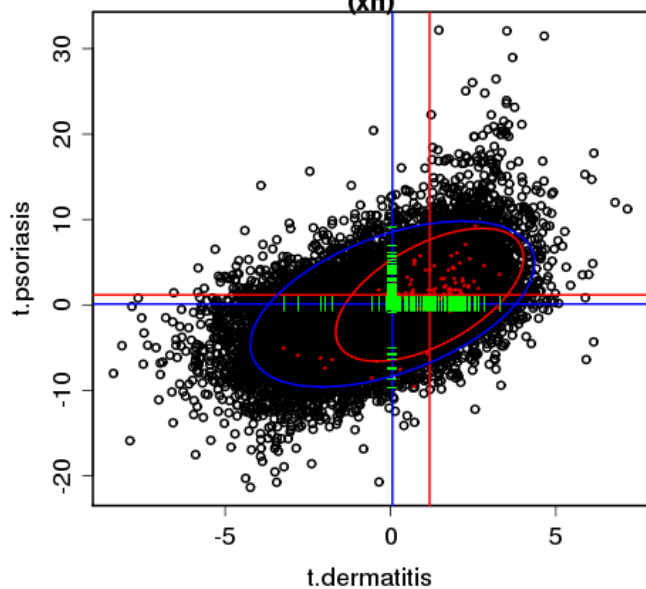

GO:0048002  
antigen processing and presentation of peptide antigen  
(xh)

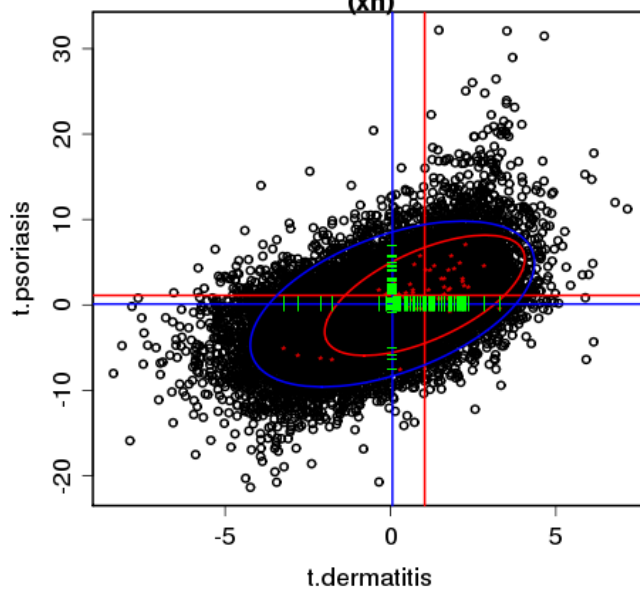



GO:0002474  
in processing and presentation of peptide antigen via MHC class II (xh)

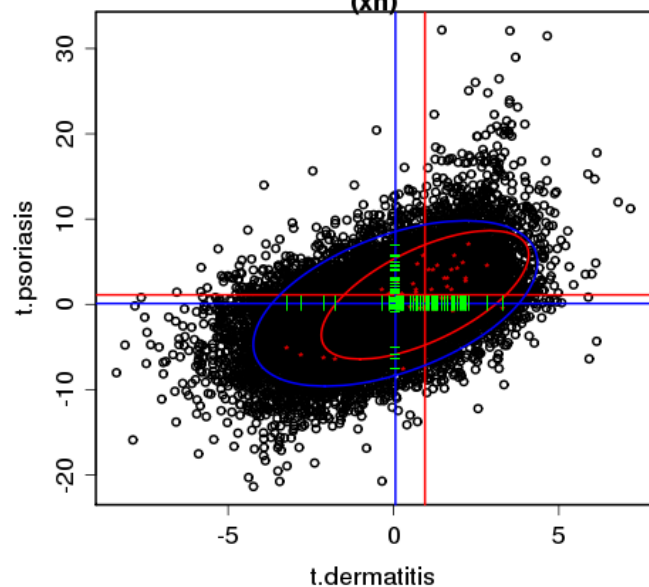

GO:0048514  
blood vessel morphogenesis (xh)

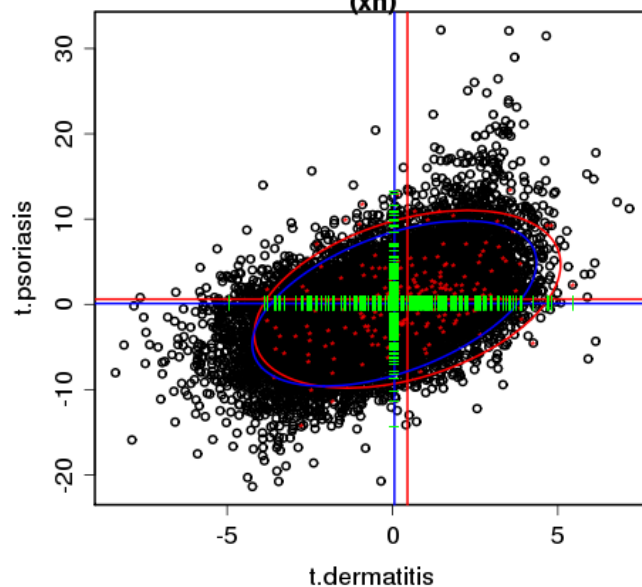

GO:0001654  
eye development (xh)

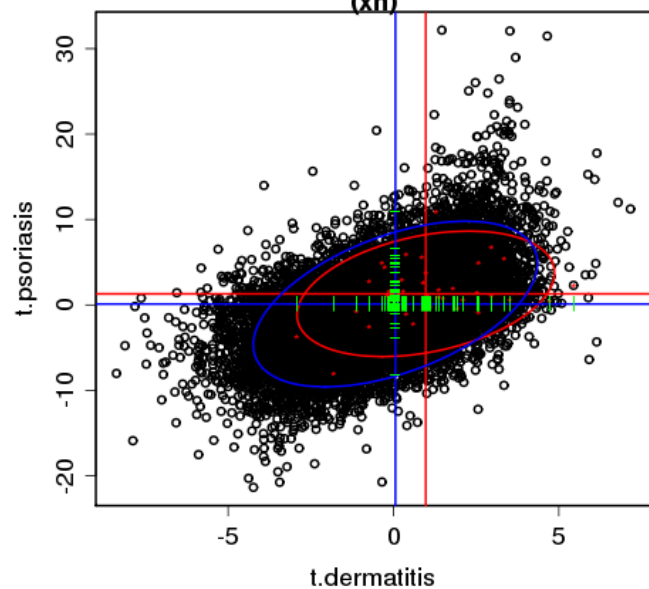

GO:0046530  
photoreceptor cell differentiation (xh)

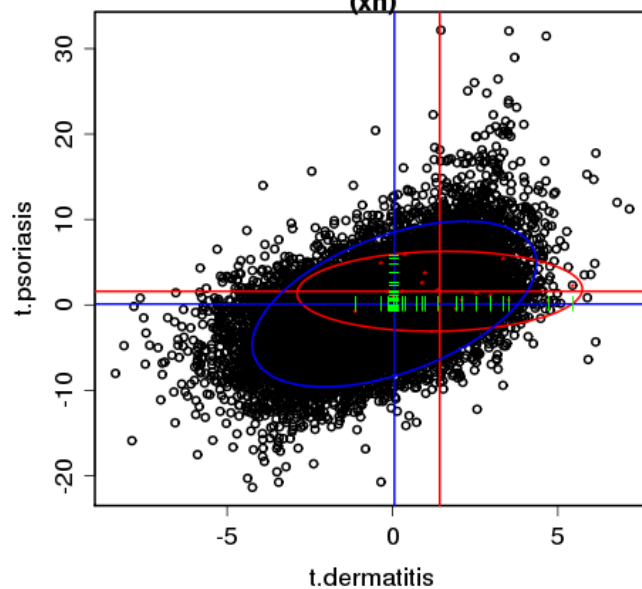

GO:0048592  
eye morphogenesis (xh)

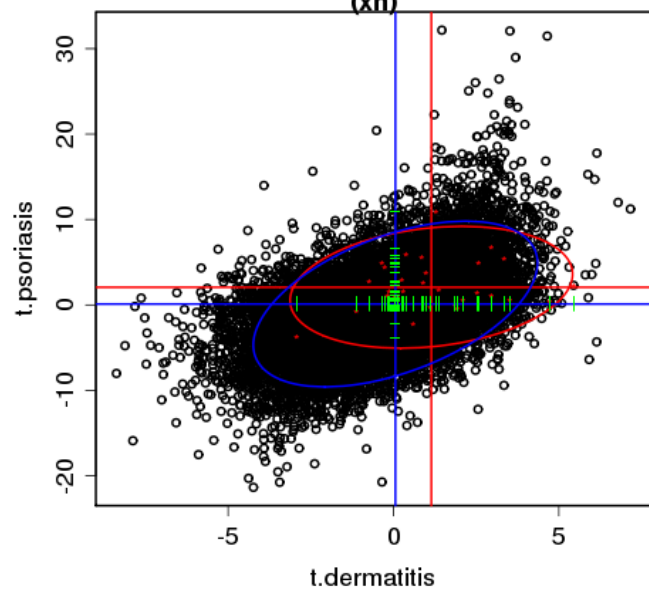

GO:0001754  
eye photoreceptor cell differentiation (xh)

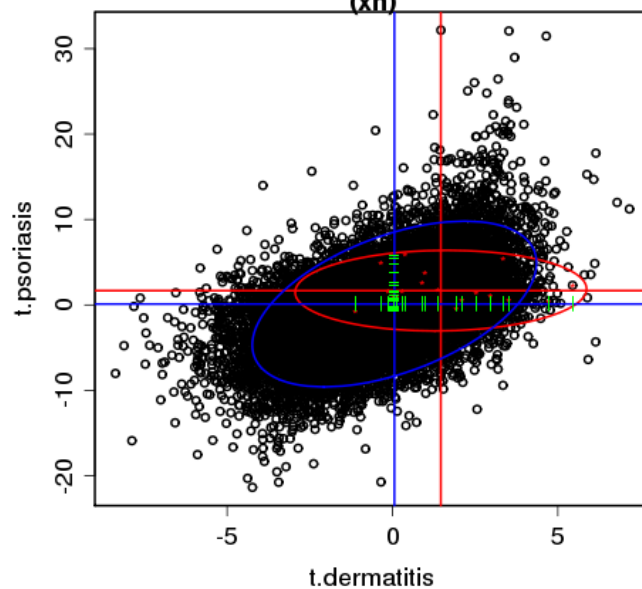

GO:0042461  
photoreceptor cell development  
(xh)

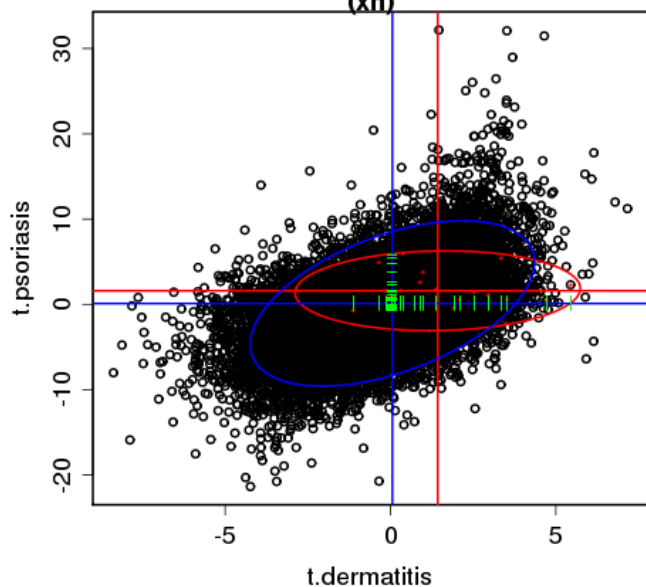

GO:0042462  
eye photoreceptor cell development  
(xh)

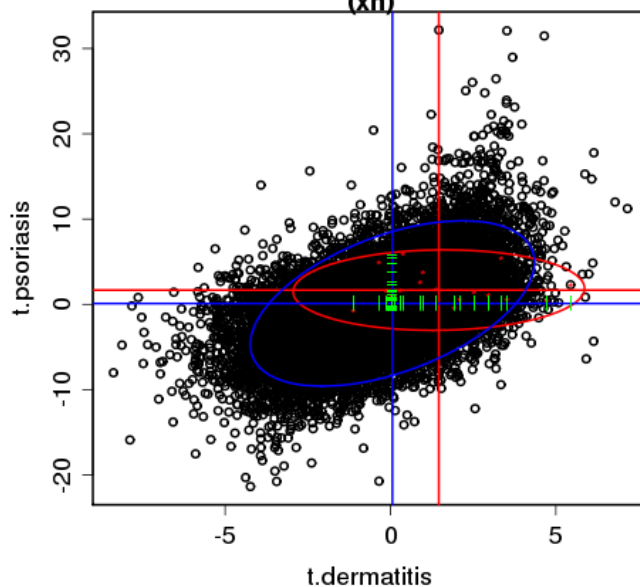

GO:0007586  
digestion  
(xh)

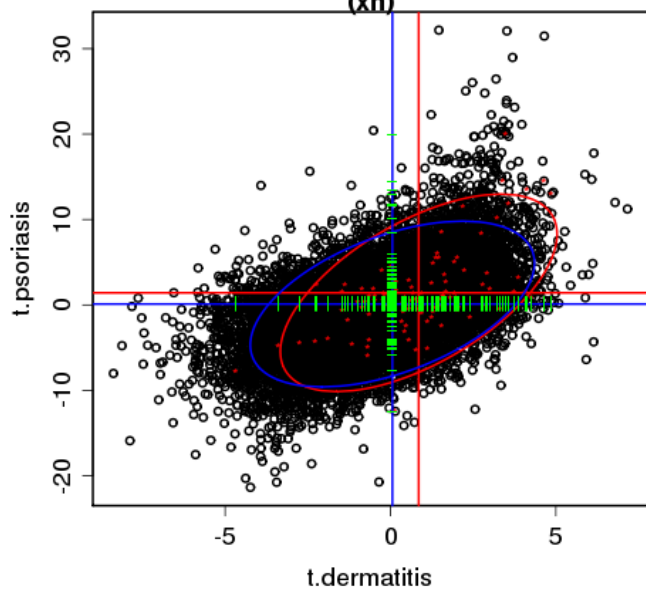

GO:0002274  
myeloid leukocyte activation  
(xh)

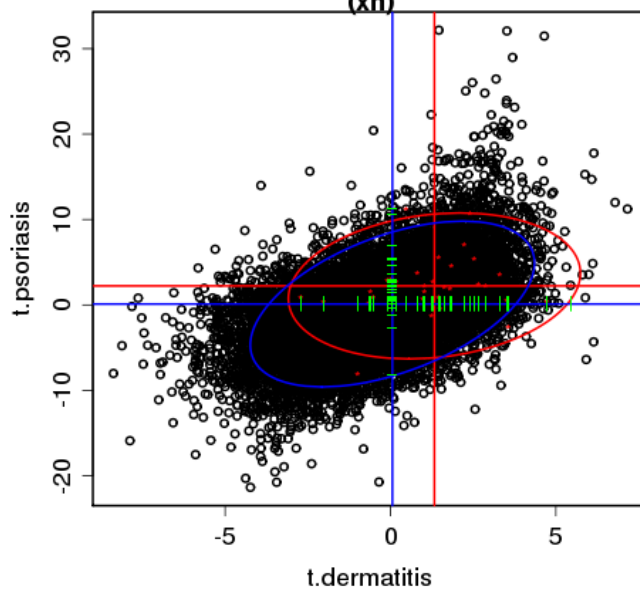

GO:0001525  
angiogenesis  
(xh)

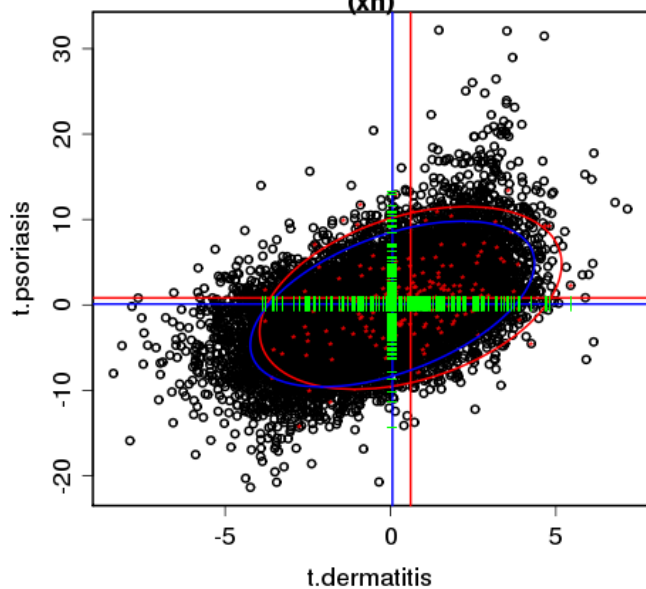

GO:0050792  
regulation of viral reproduction  
(xh)

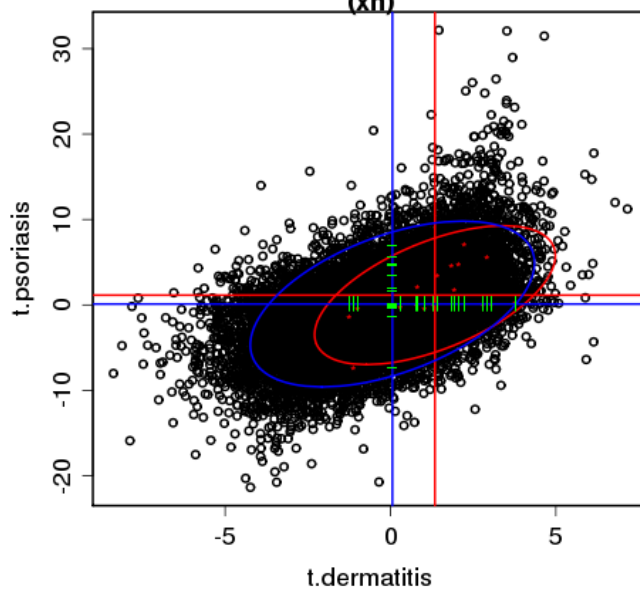



**GO:0045069**  
**regulation of viral genome replication**  
(xh)

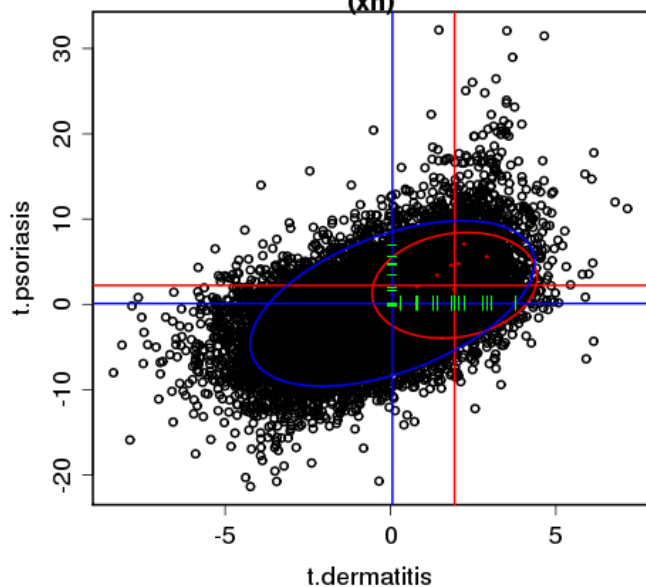

**GO:0007159**  
**leukocyte adhesion**  
(xh)

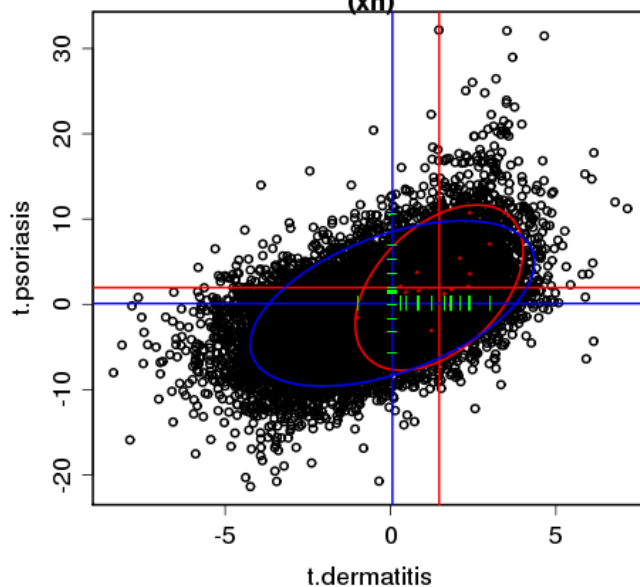

**GO:0007416**  
**synaptogenesis**  
(xh)

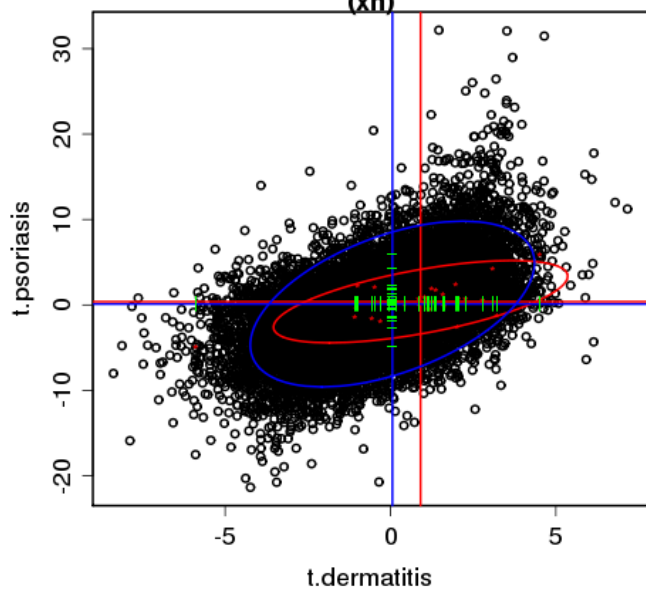

**GO:0045576**  
**mast cell activation**  
(xh)

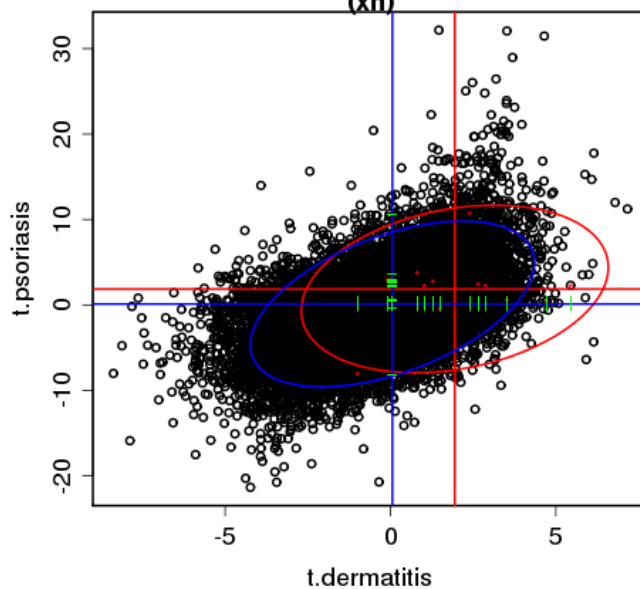

**GO:0006007**  
**glucose catabolic process**  
(xh)

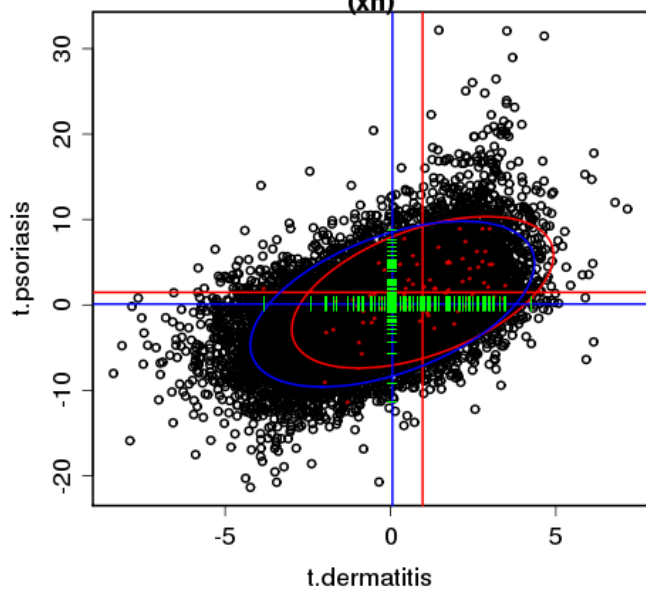

**GO:0016052**  
**carbohydrate catabolic process**  
(xh)

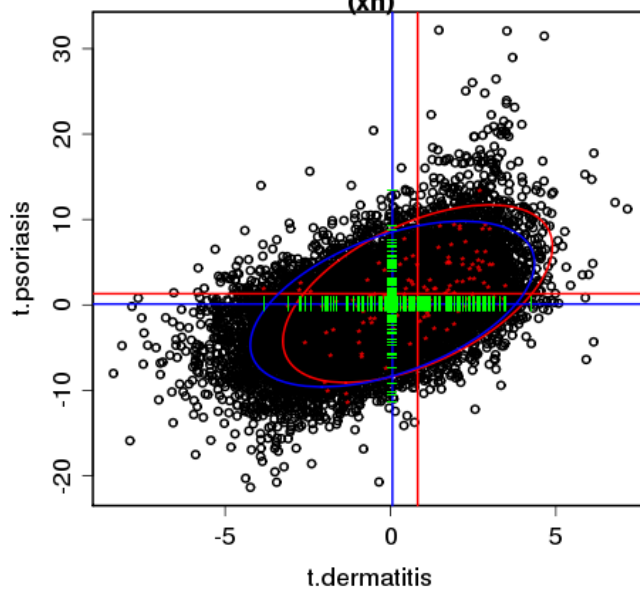

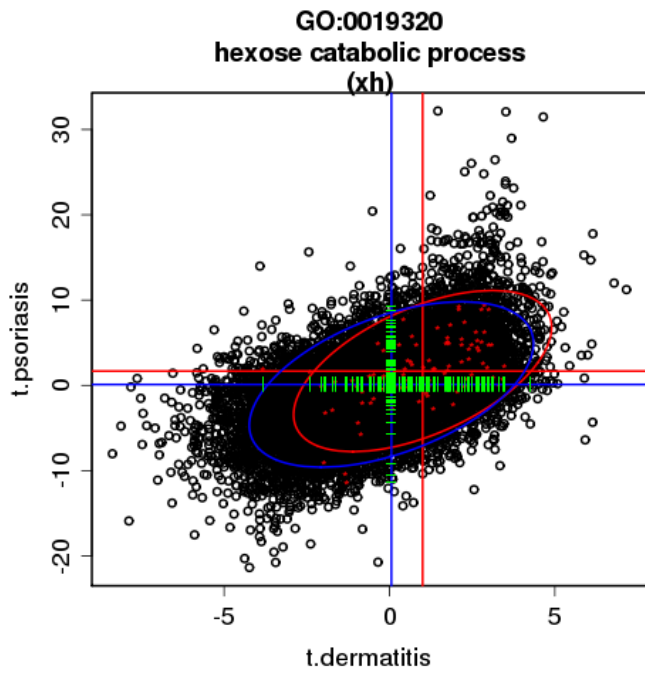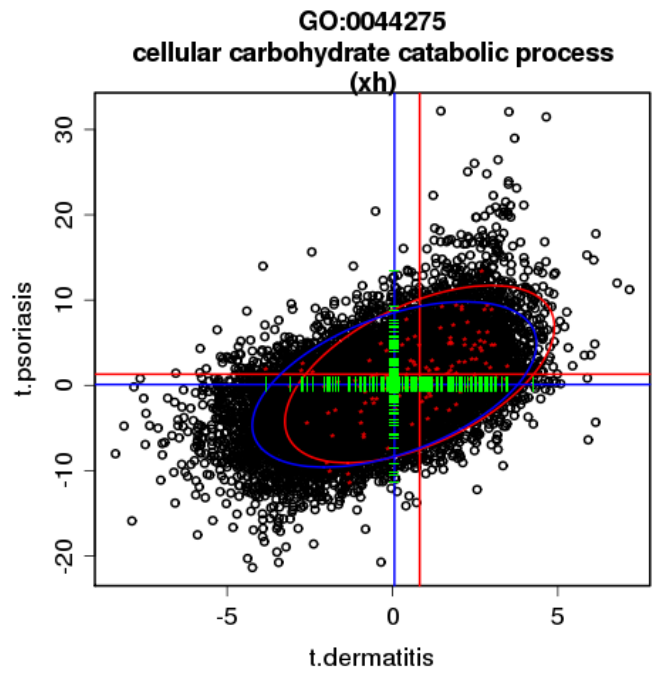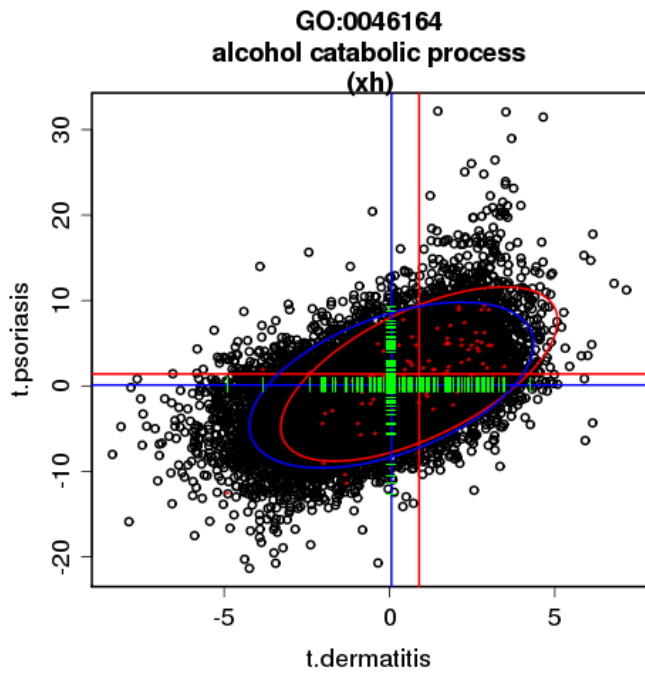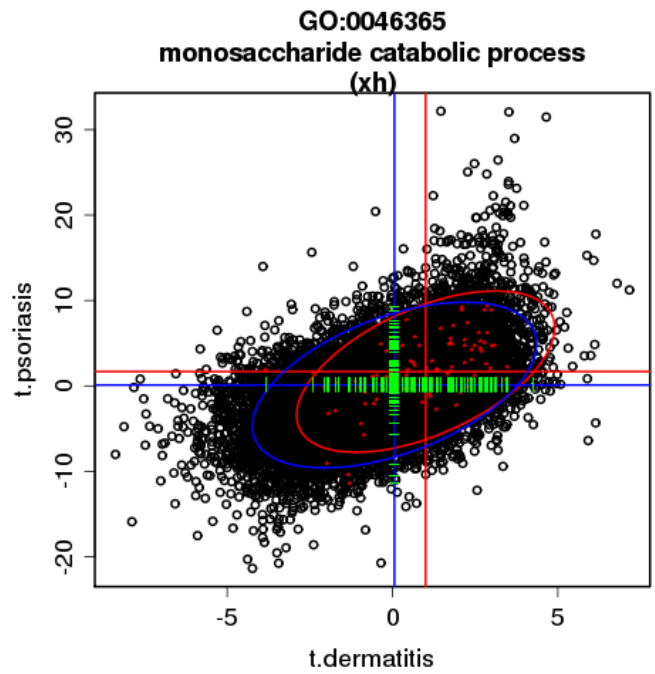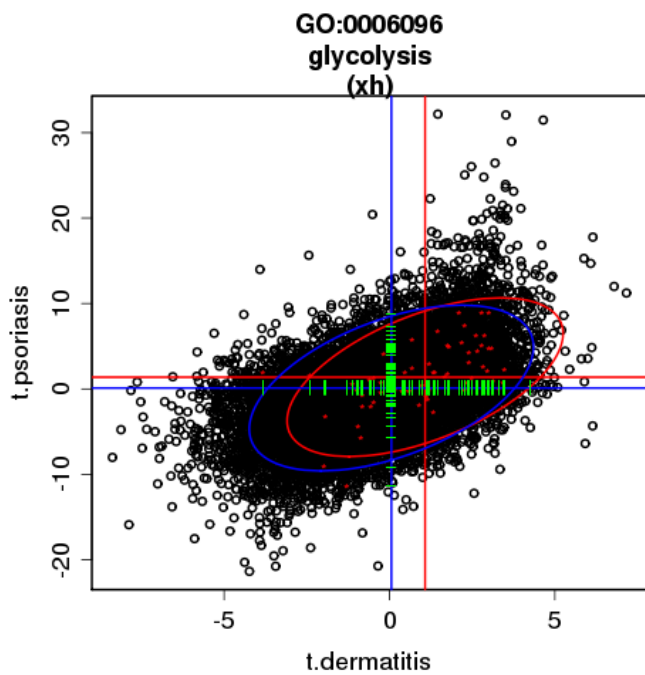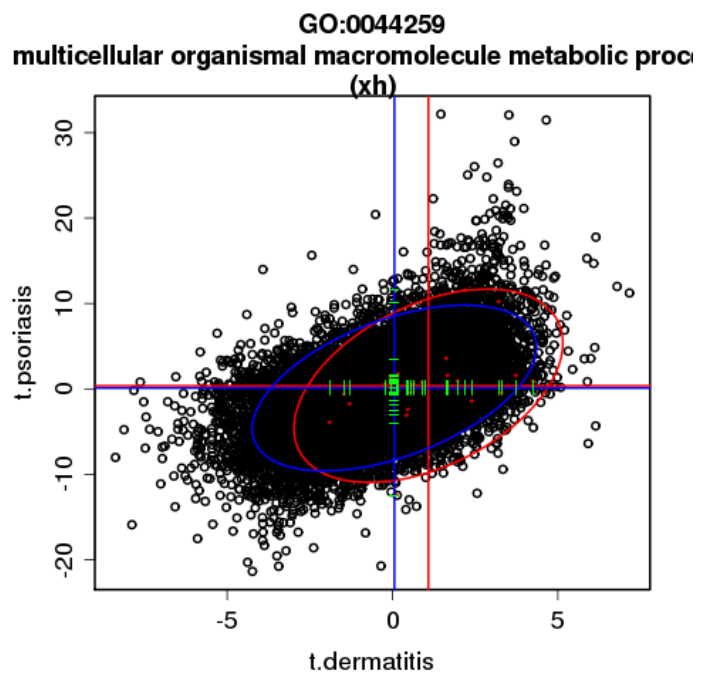

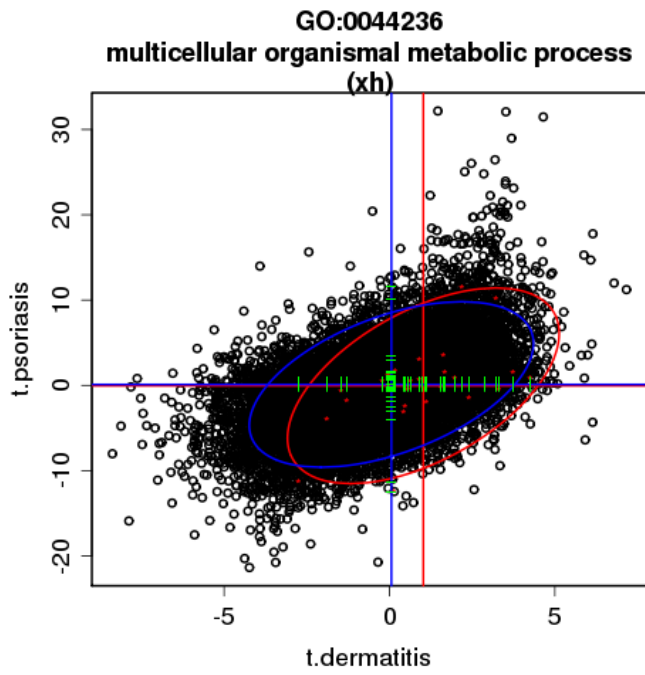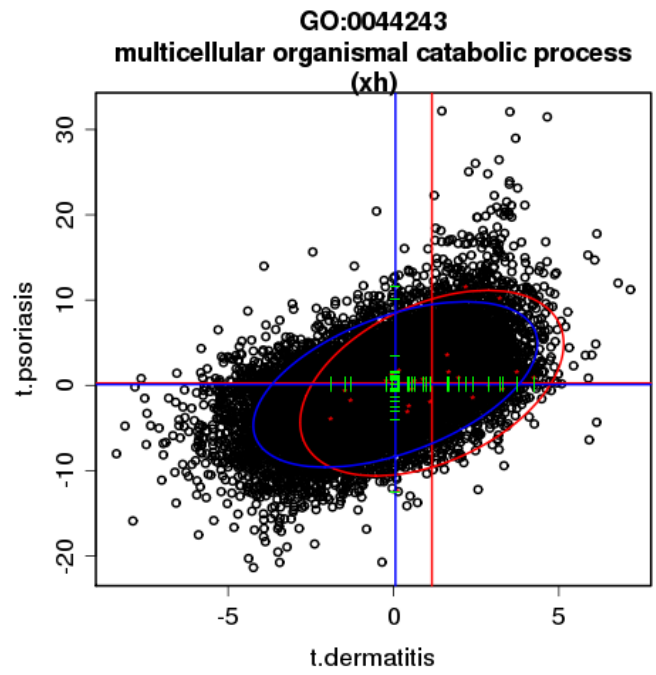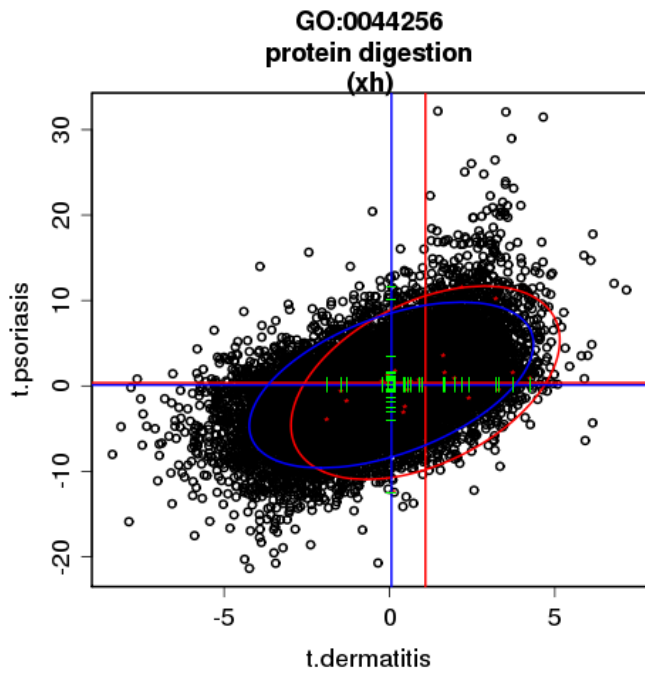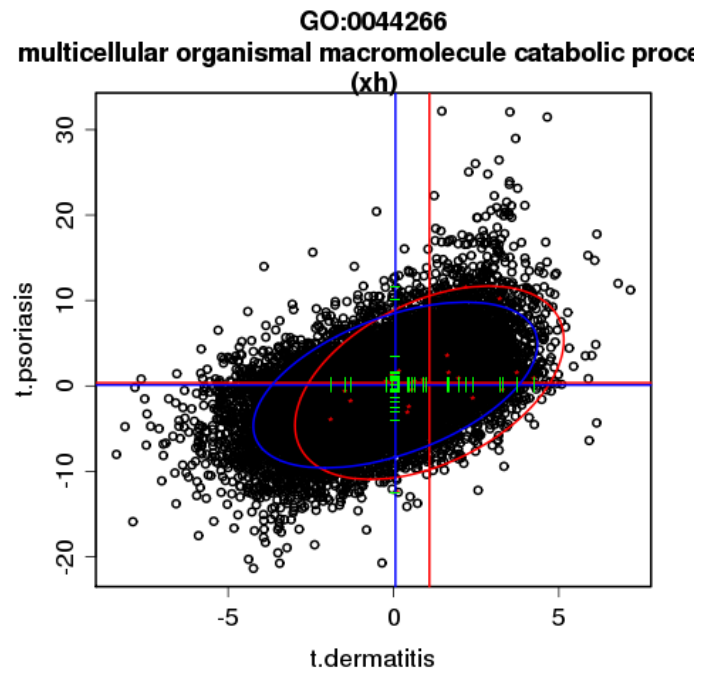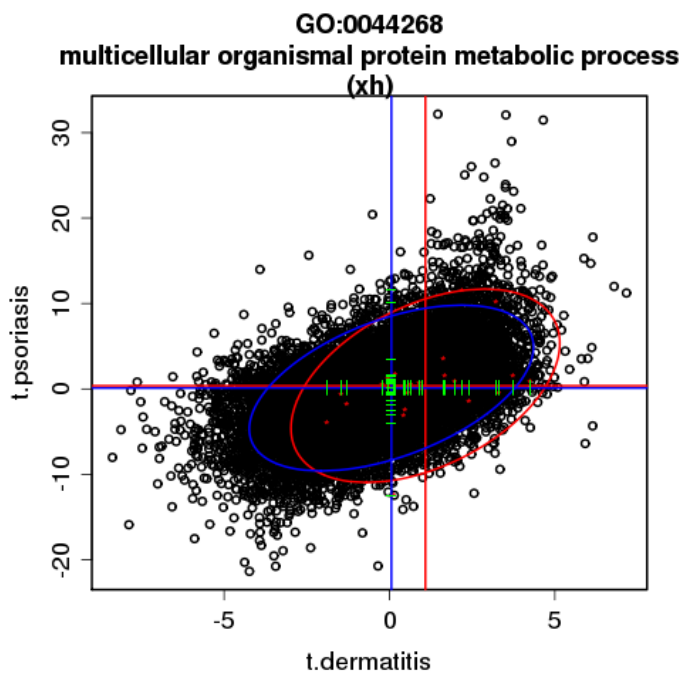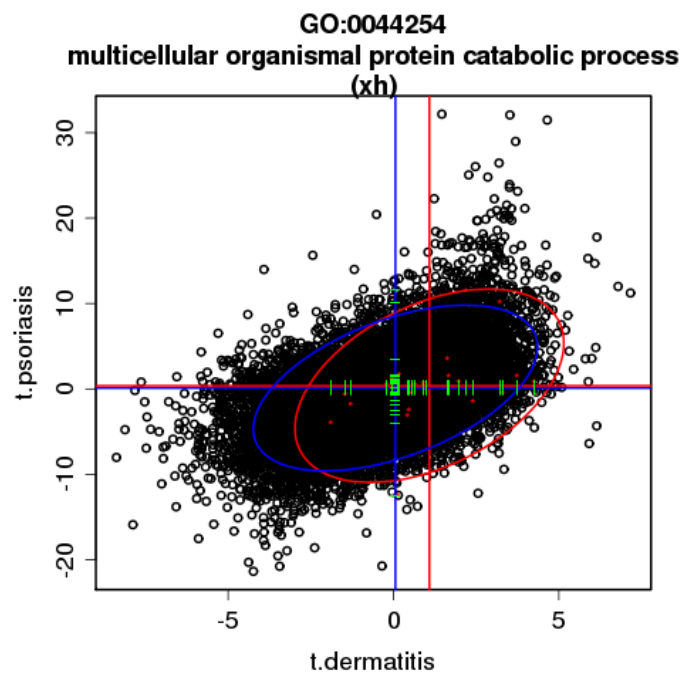

GO:0030574  
collagen catabolic process  
(xh)

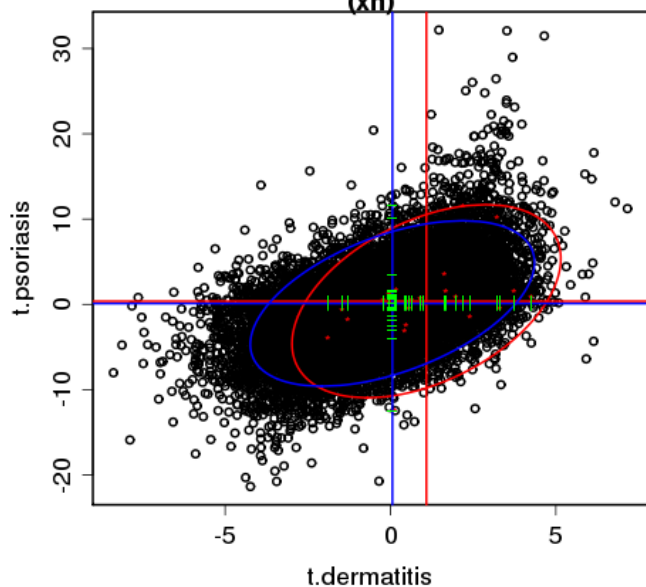

GO:0009617  
response to bacterium  
(xh)

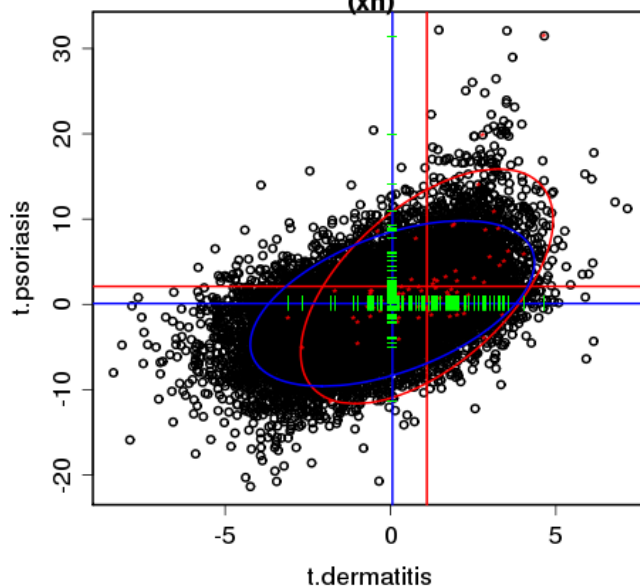

GO:0042742  
defense response to bacterium  
(xh)

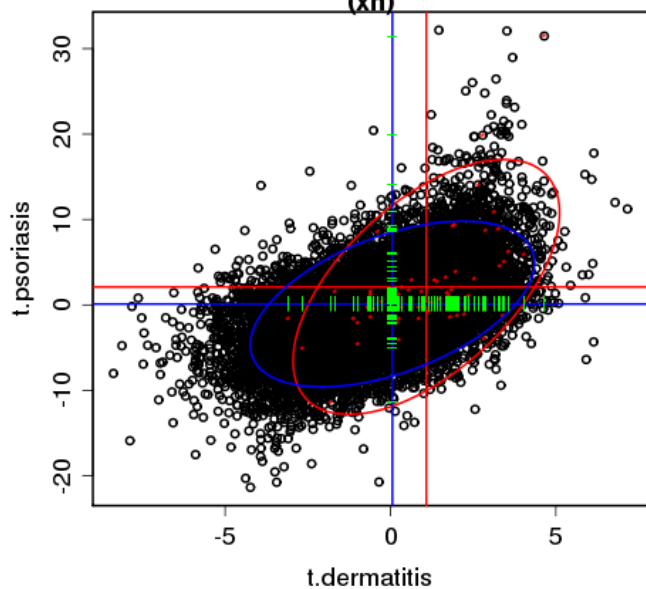

GO:0043010  
camera-type eye development  
(xh)

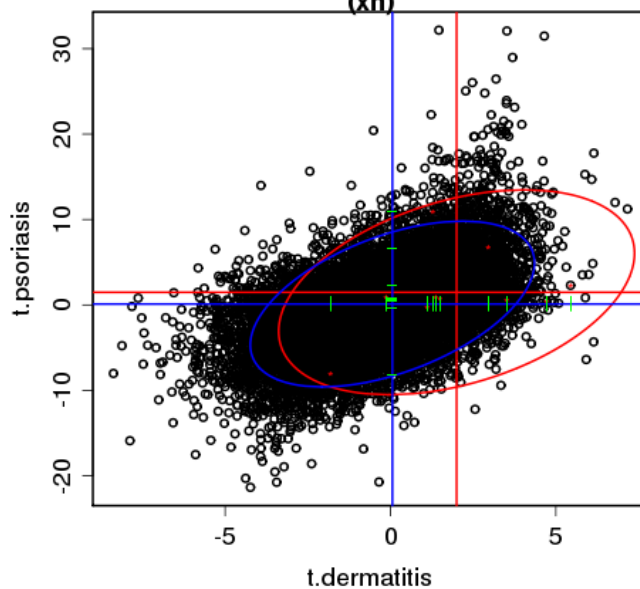

GO:0051606  
detection of stimulus  
(xh)

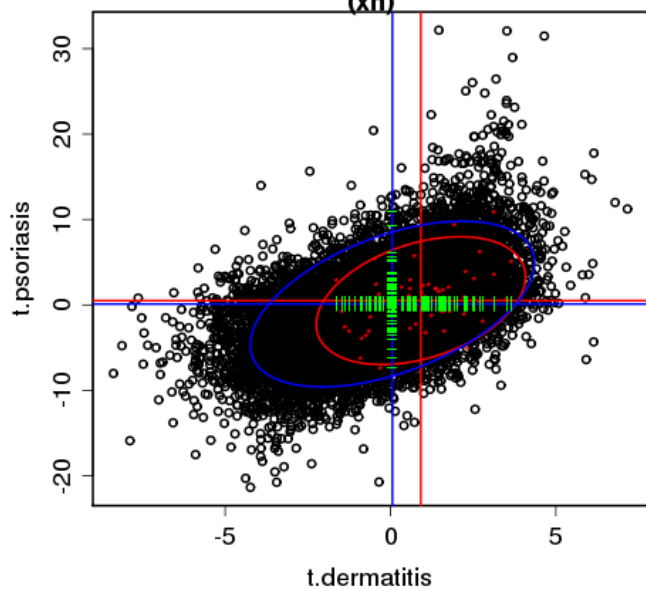

GO:0009581  
detection of external stimulus  
(xh)

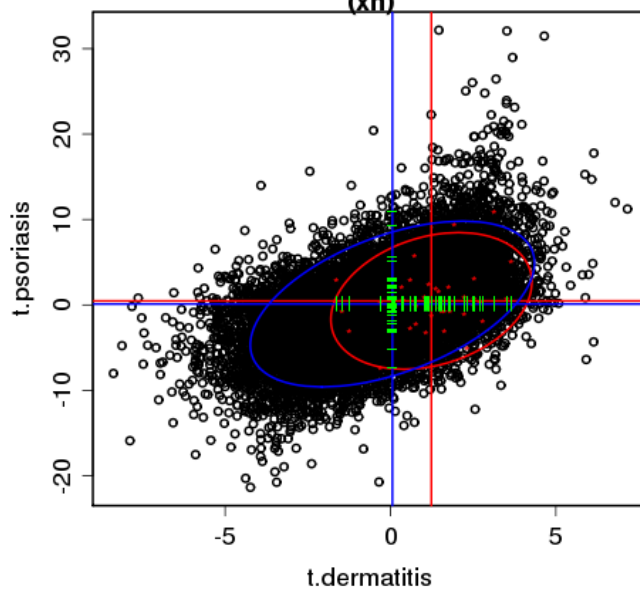

**GO:0000270**  
**peptidoglycan metabolic process**  
**(xh)**

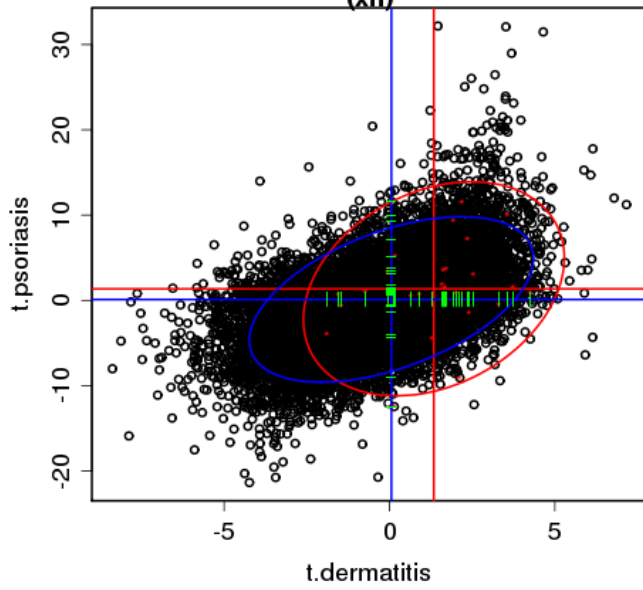

**GO:0043542**  
**endothelial cell migration**  
**(xh)**

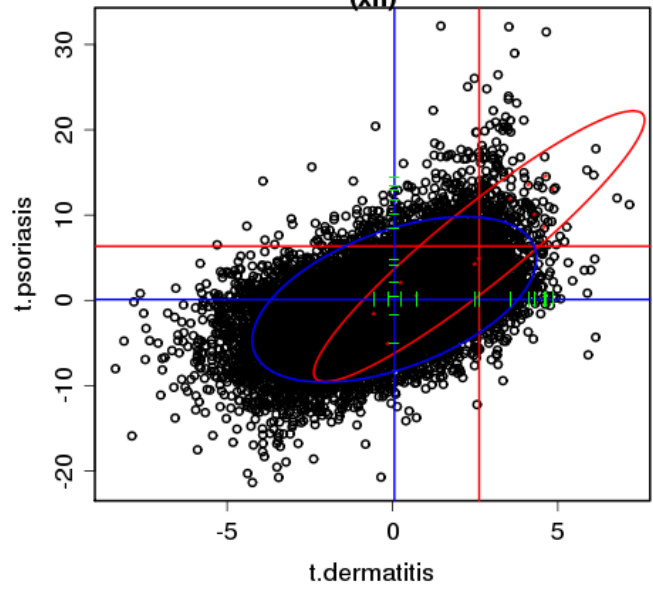

**GO:0051208**  
**sequestering of calcium ion**  
**(xh)**

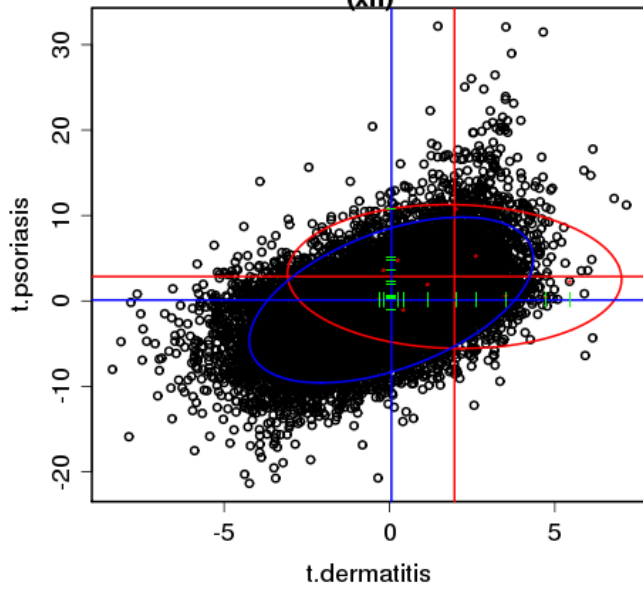

**GO:0051238**  
**sequestering of metal ion**  
**(xh)**

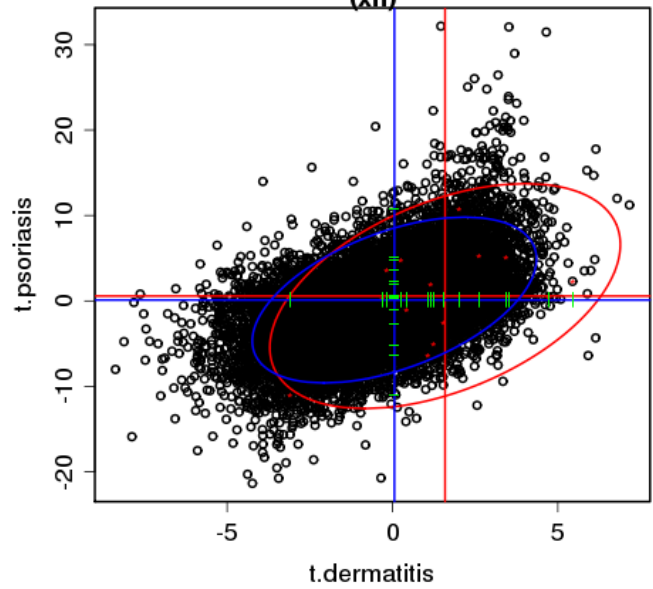

**GO:0009306**  
**protein secretion**  
**(xh)**

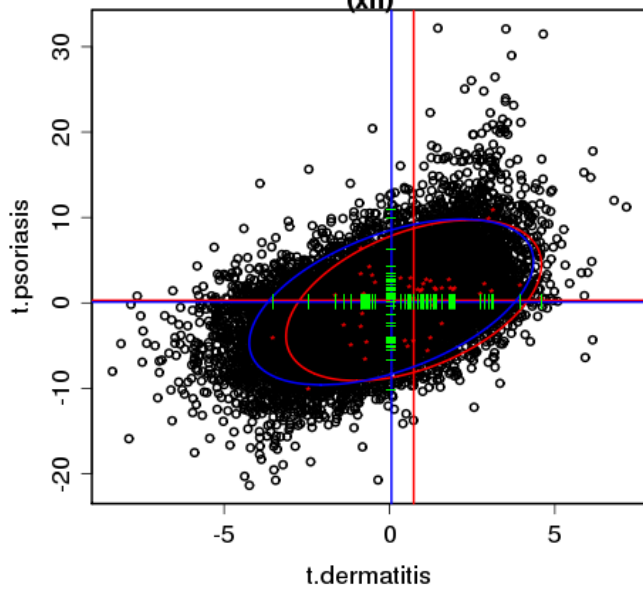

**GO:0009582**  
**detection of abiotic stimulus**  
**(xh)**

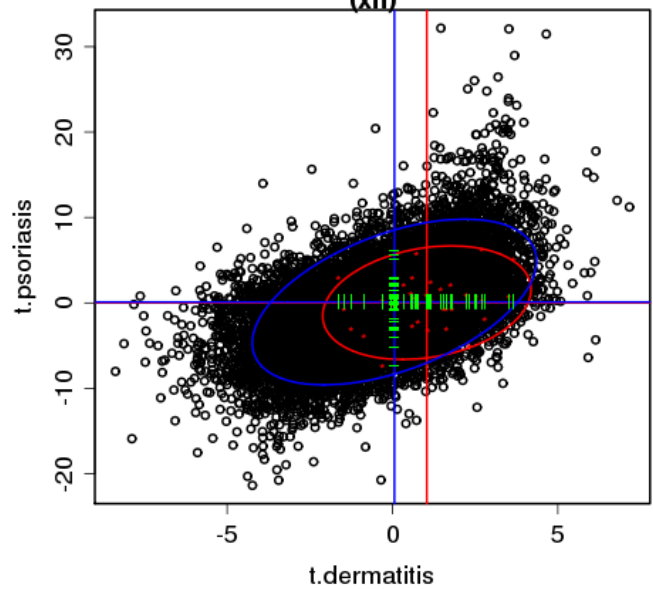

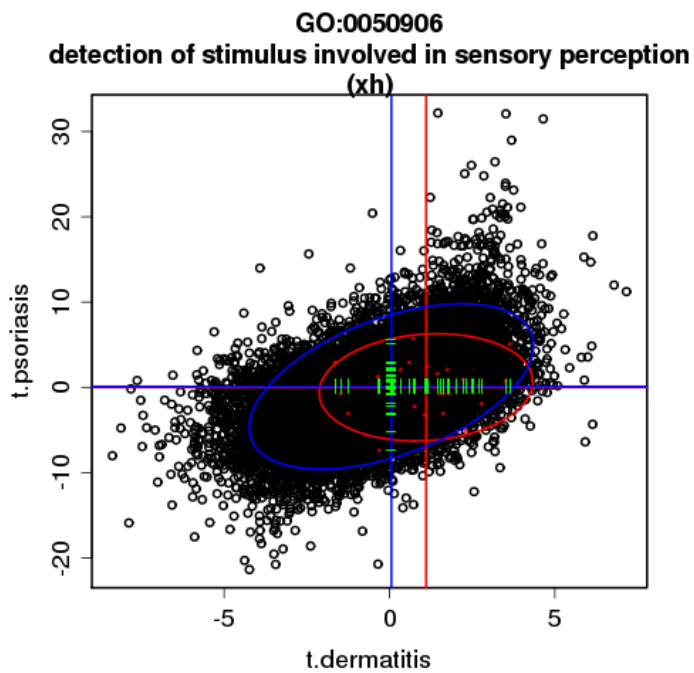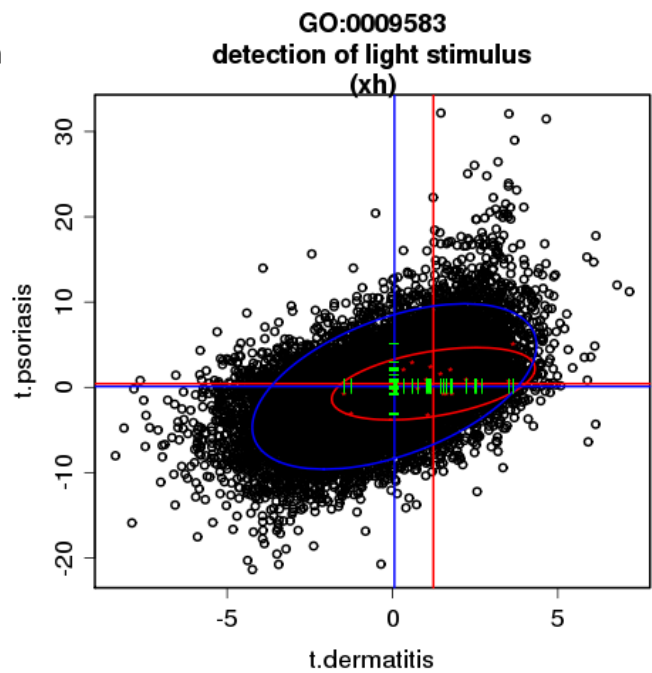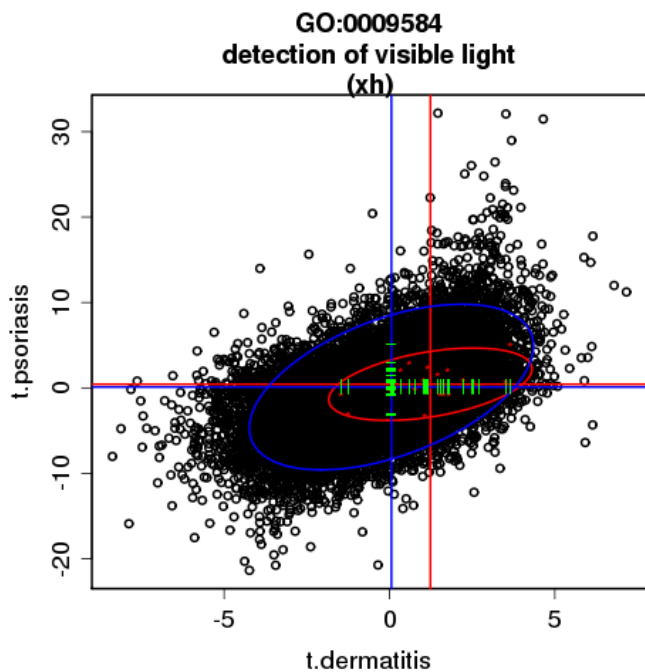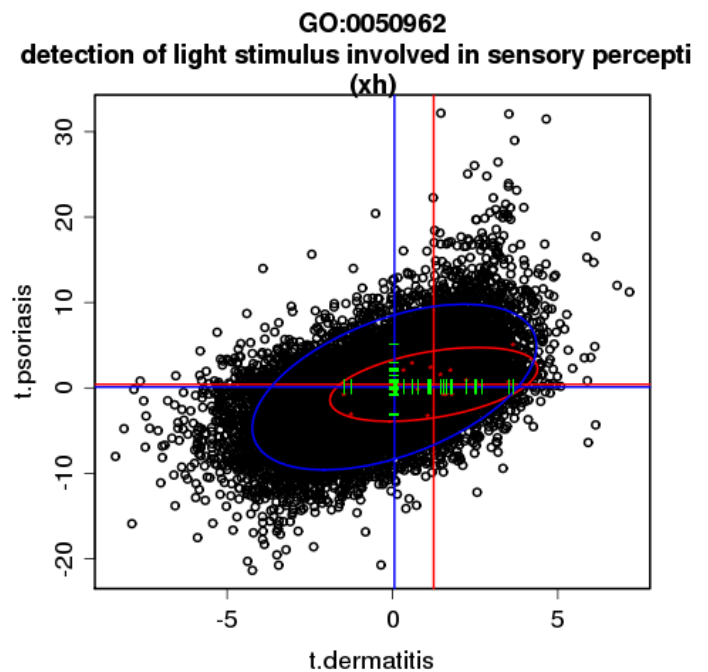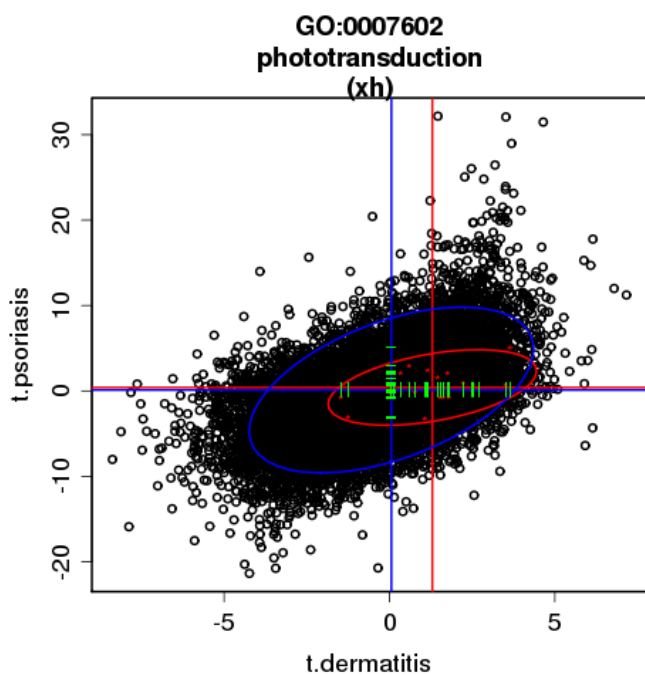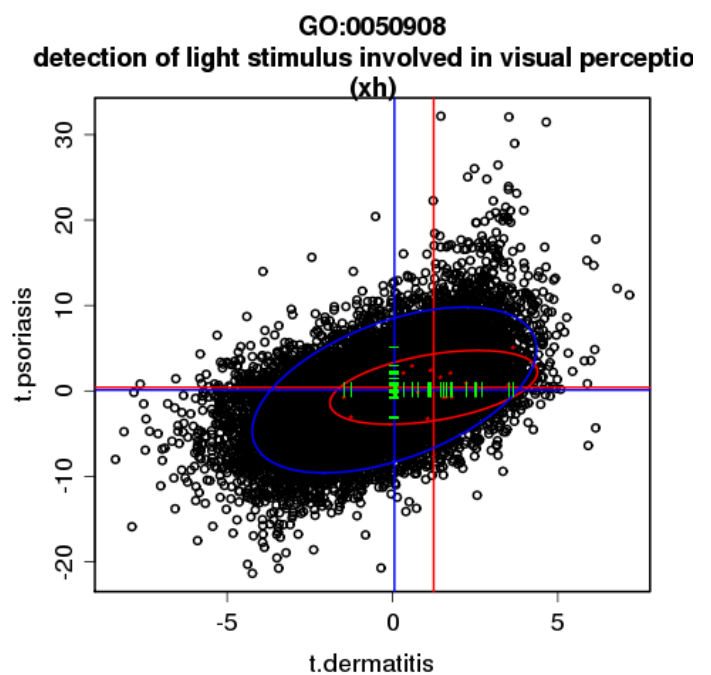



**GO:0002504**  
**antigen presentation and presentation of peptide or polysaccharide antigen**

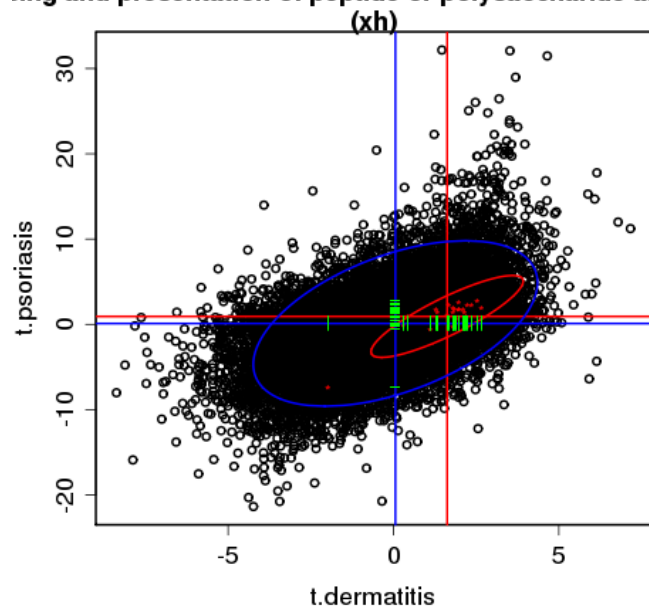

**GO:0045045**

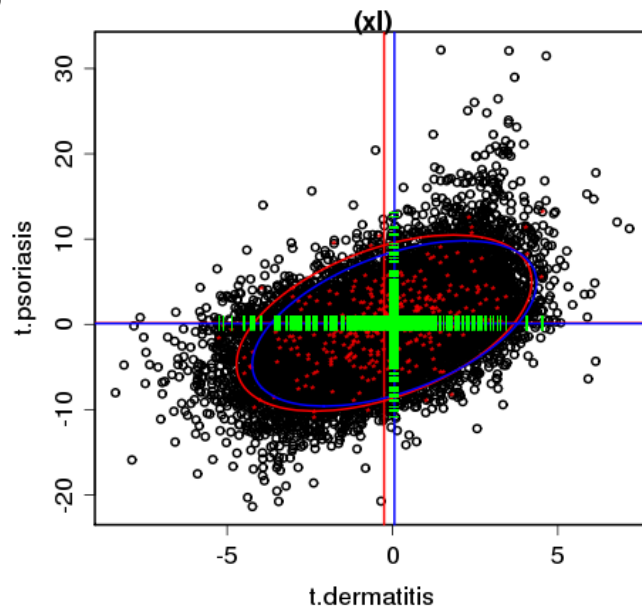

**GO:0006325**  
**chromatin organization and/or maintenance of chromatin architecture**

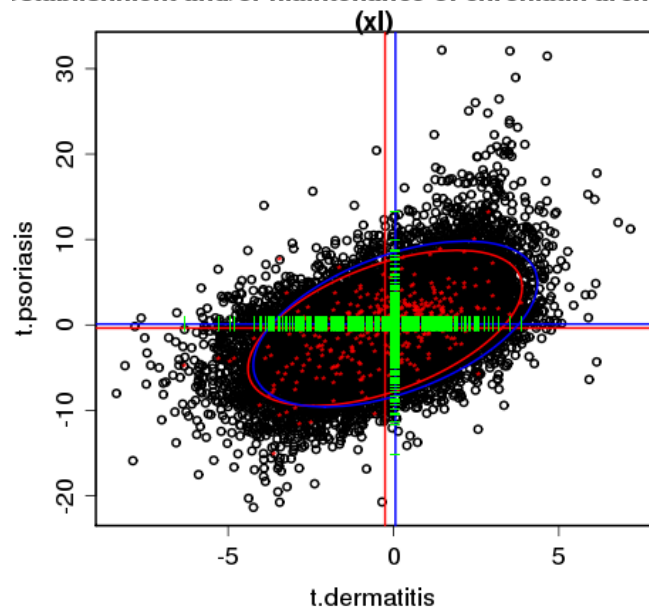

**GO:0051276**  
**chromosome organization and biogenesis**

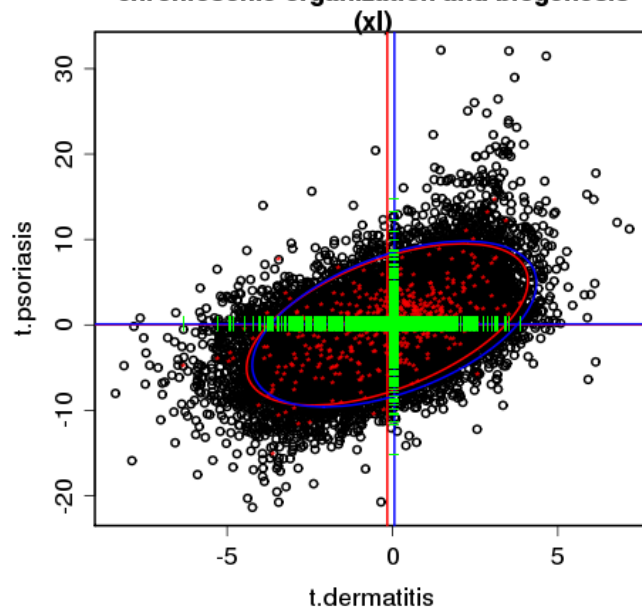

**GO:0016568**  
**chromatin modification**

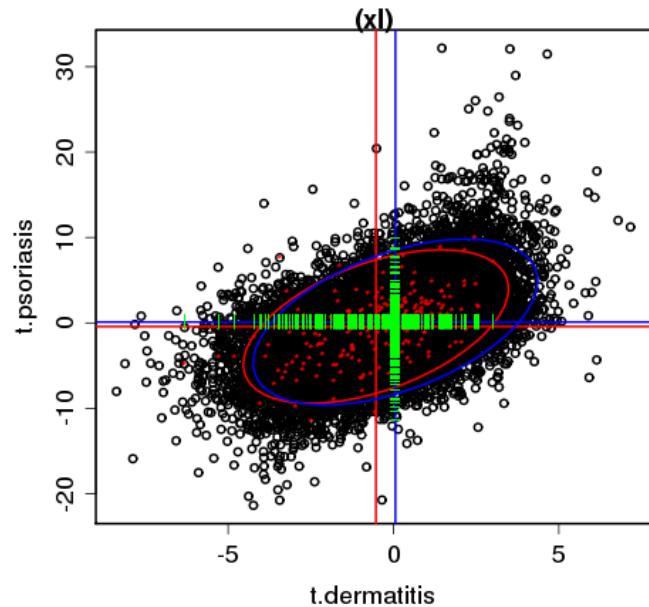

**GO:0007264**  
**small GTPase mediated signal transduction**

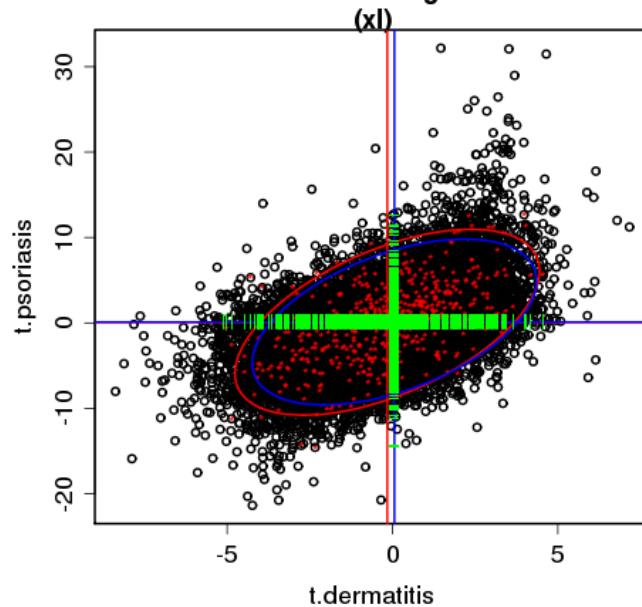



GO:0006631  
fatty acid metabolic process

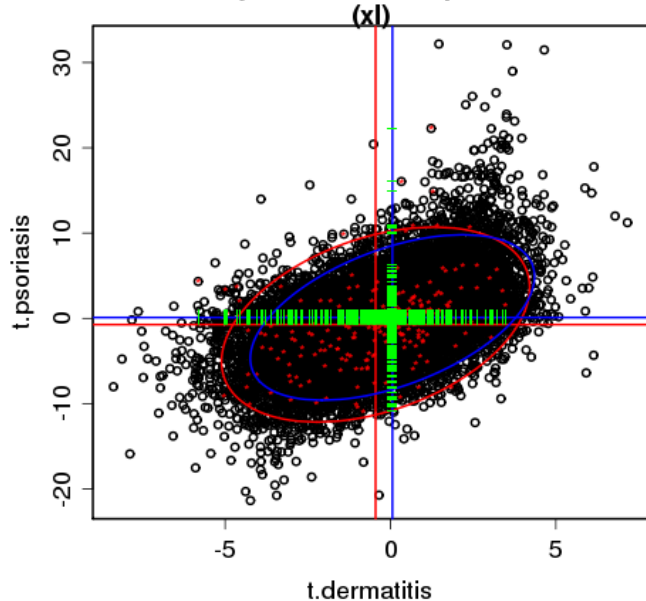

GO:0008202  
steroid metabolic process

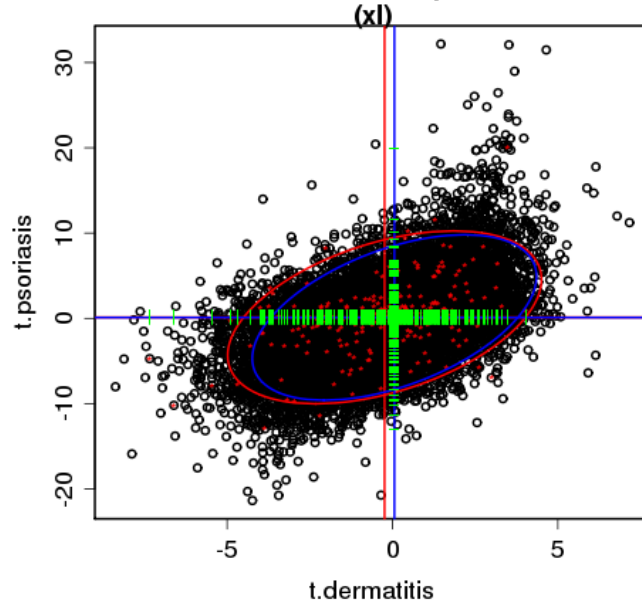

GO:0030183  
B cell differentiation

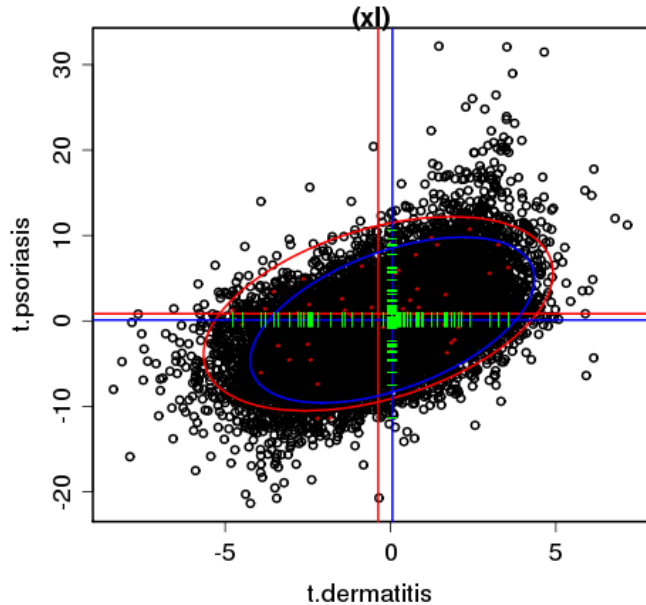

GO:0045786  
negative regulation of cell cycle

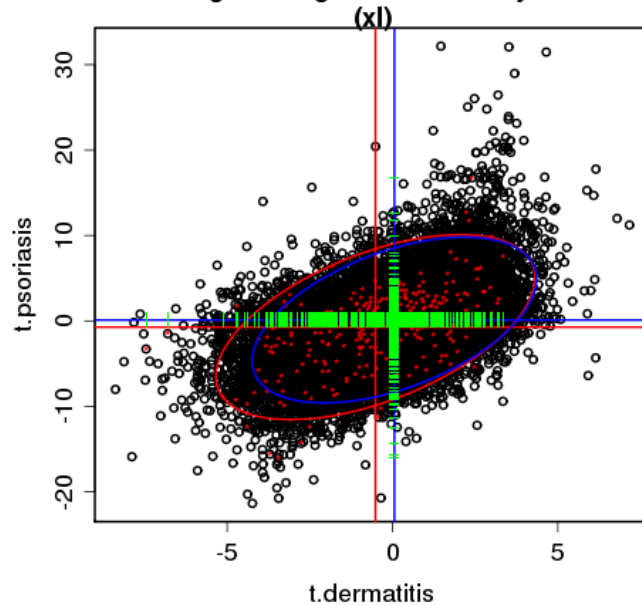

GO:0007179  
transforming growth factor beta receptor signaling pathway

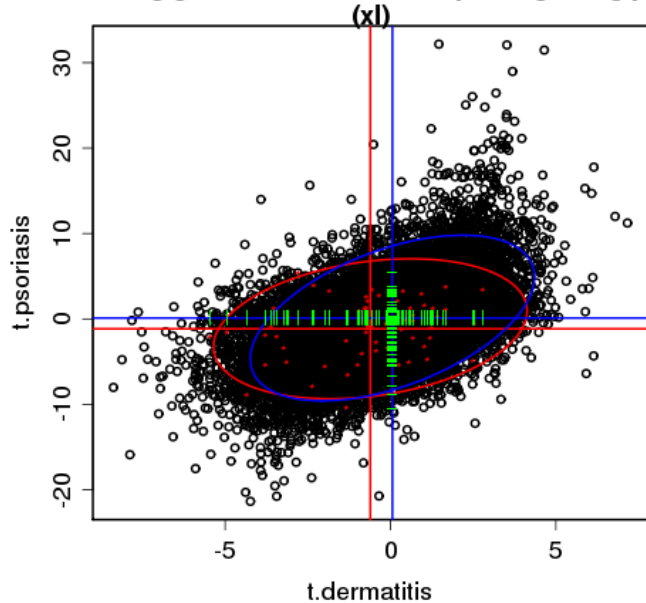

GO:0008610  
lipid biosynthetic process

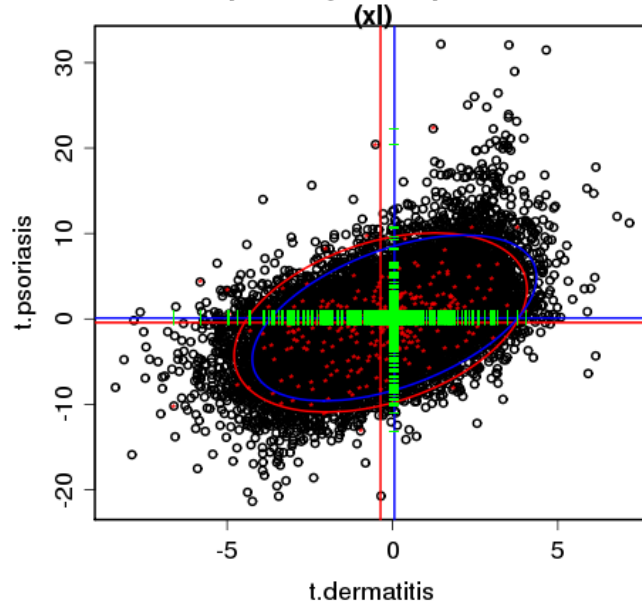

**GO:0007050**  
**cell cycle arrest**  
**(xl)**

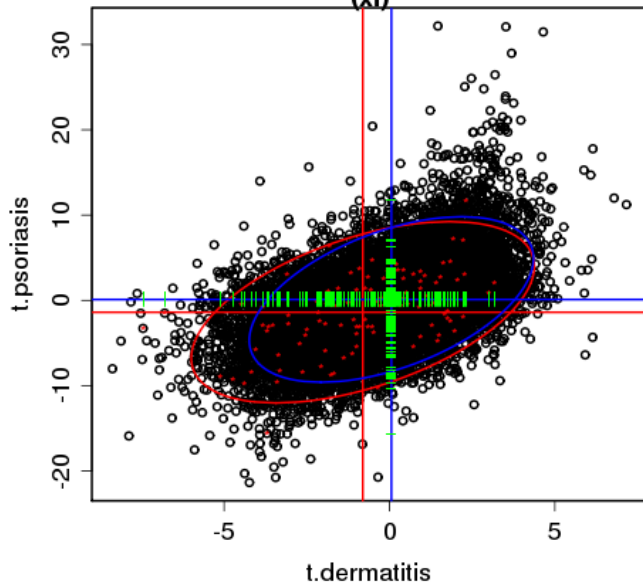

**GO:0048193**  
**Golgi vesicle transport**  
**(xl)**

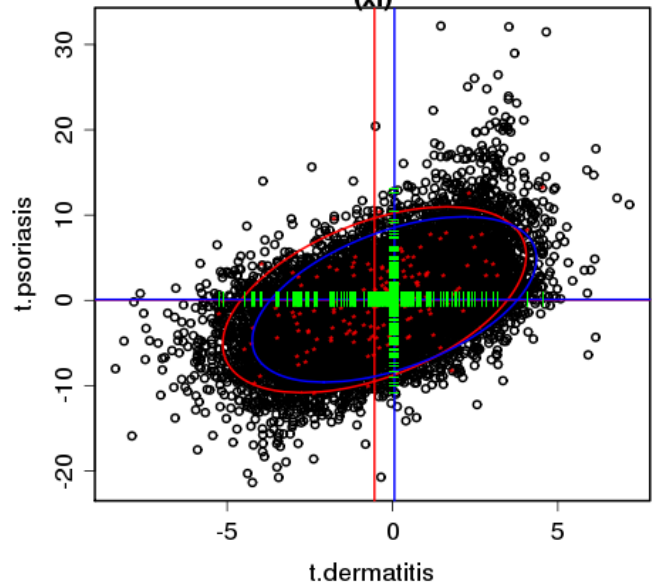

**GO:0006473**  
**protein amino acid acetylation**  
**(xl)**

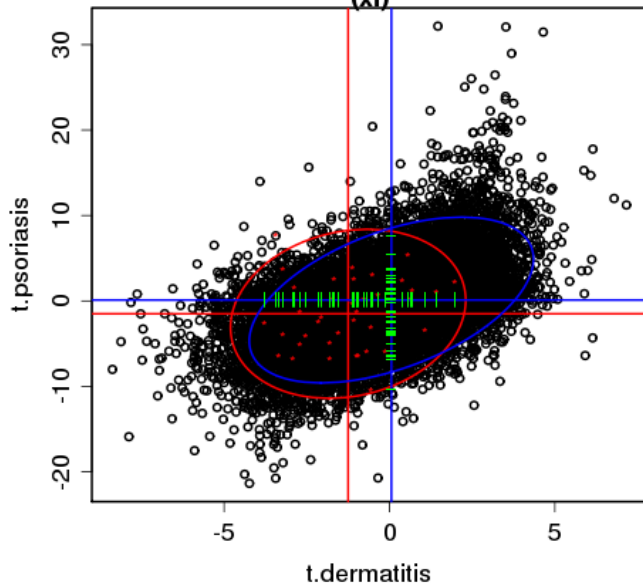

**GO:0016569**  
**covalent chromatin modification**  
**(xl)**

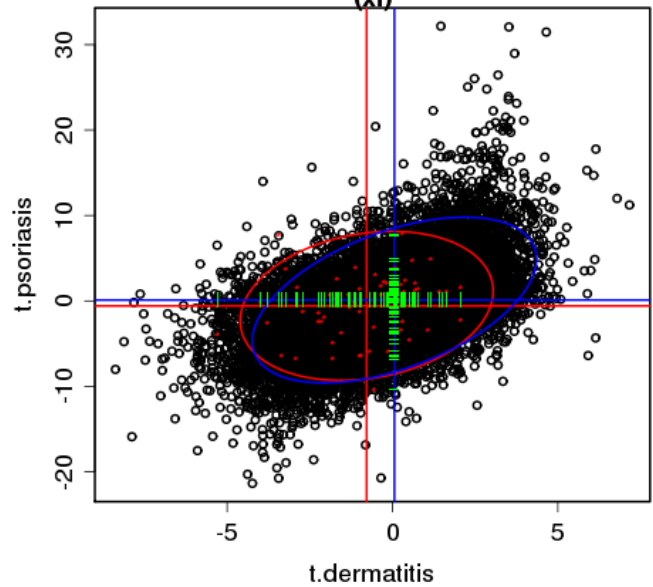

**GO:0016570**  
**histone modification**  
**(xl)**

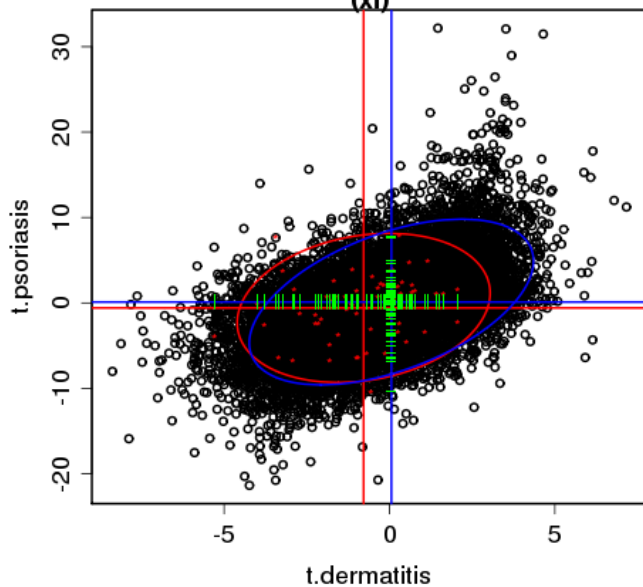

**GO:0043543**  
**protein amino acid acylation**  
**(xl)**

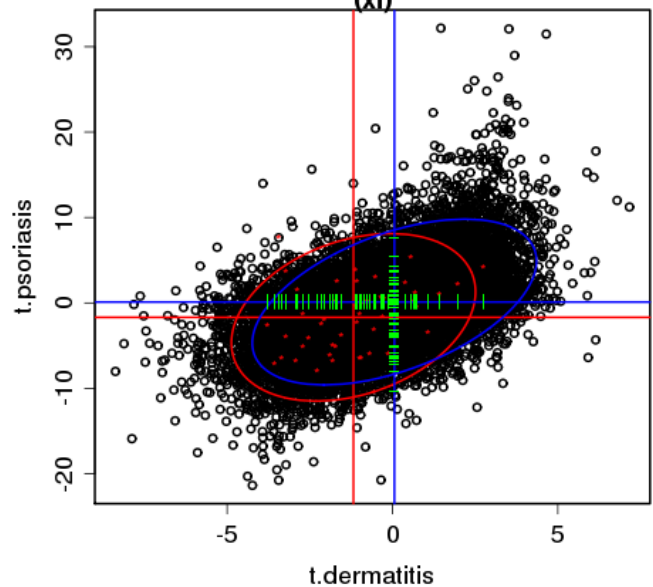

GO:0032273

positive regulation of protein polymerization

(xl)

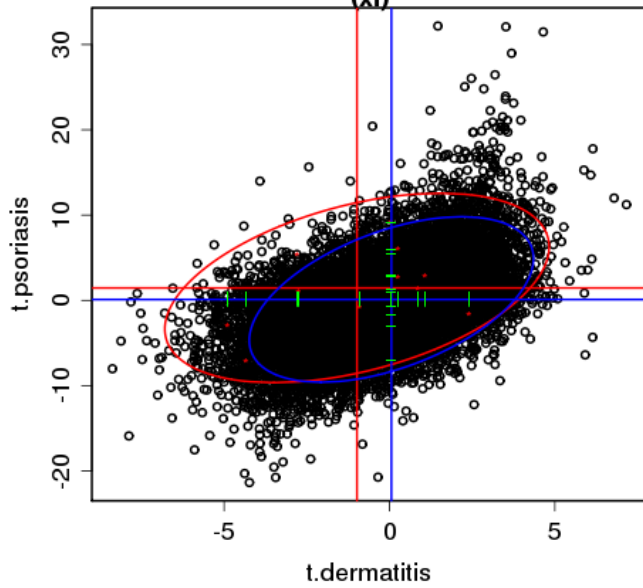

GO:0051495

positive regulation of cytoskeleton organization and biogenesis

(xl)

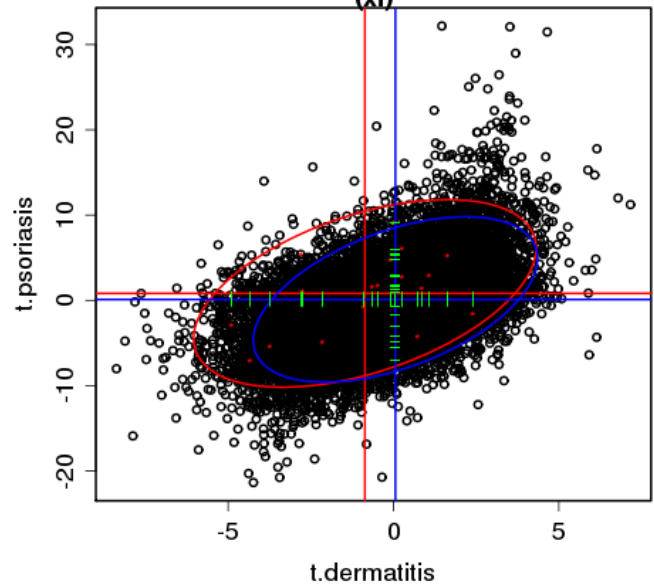

GO:0030518

steroid hormone receptor signaling pathway

(xl)

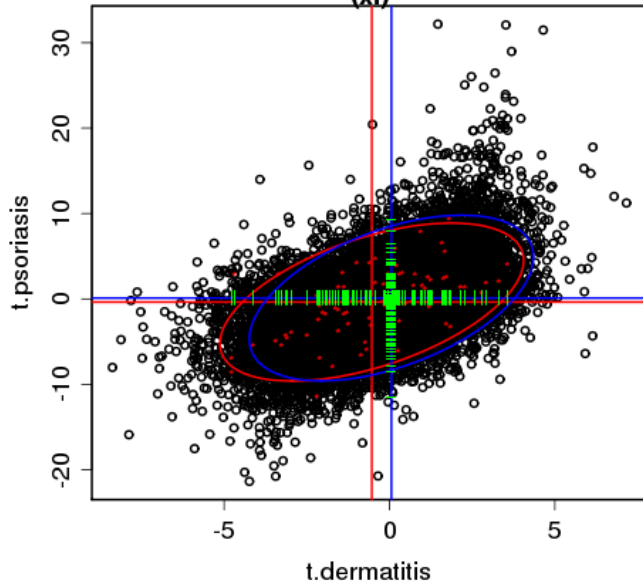

GO:0030522

intracellular receptor-mediated signaling pathway

(xl)

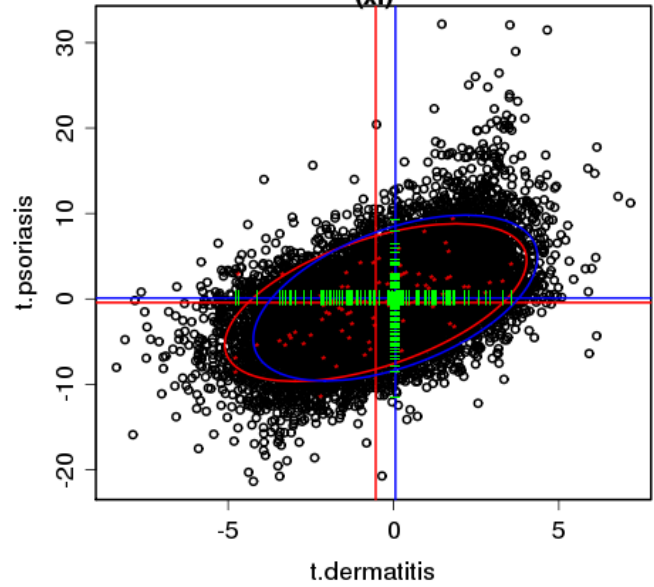

GO:0006694

steroid biosynthetic process

(xl)

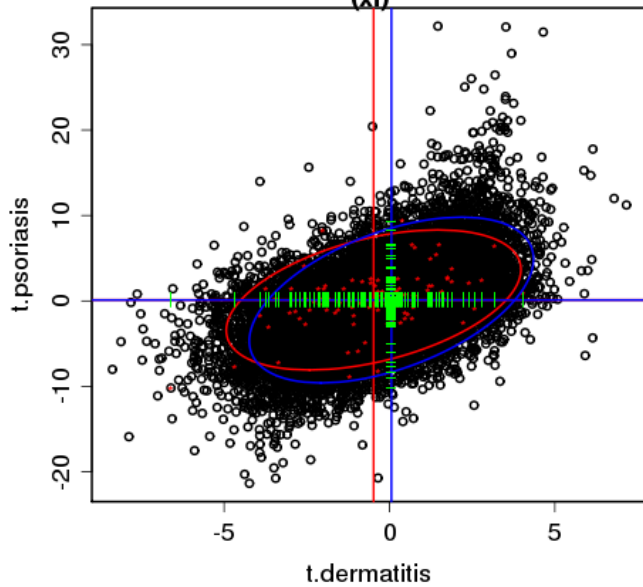

GO:0045682

regulation of epidermis development

(xl)

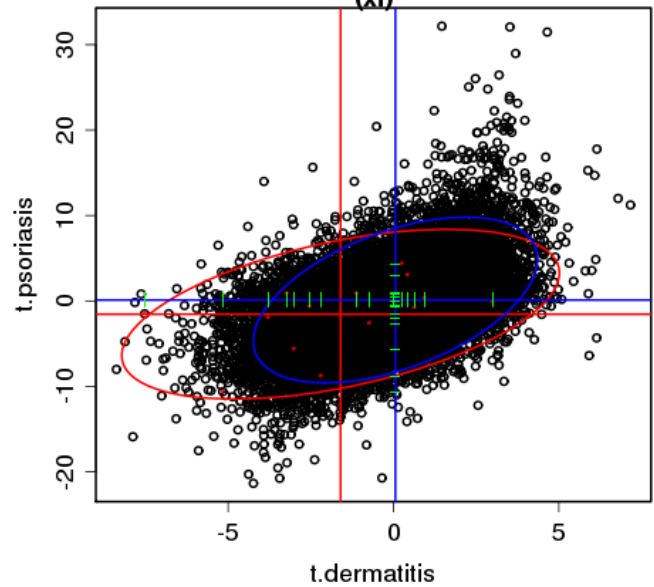

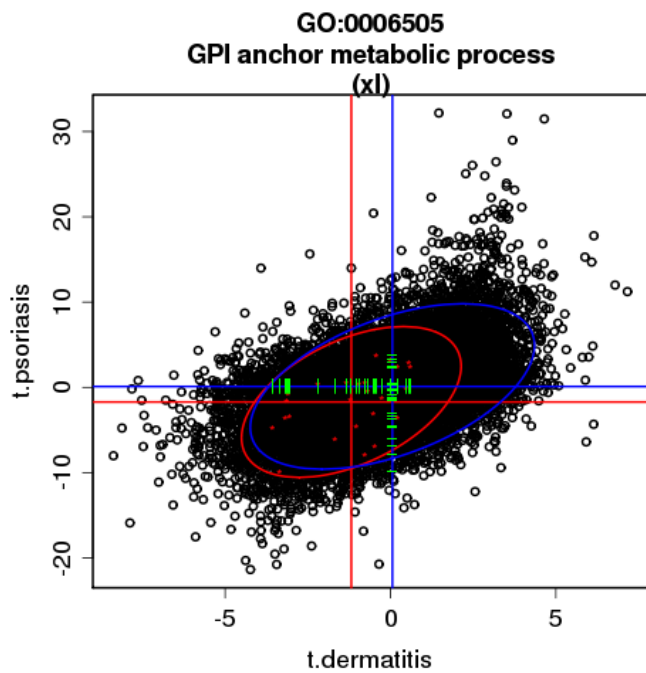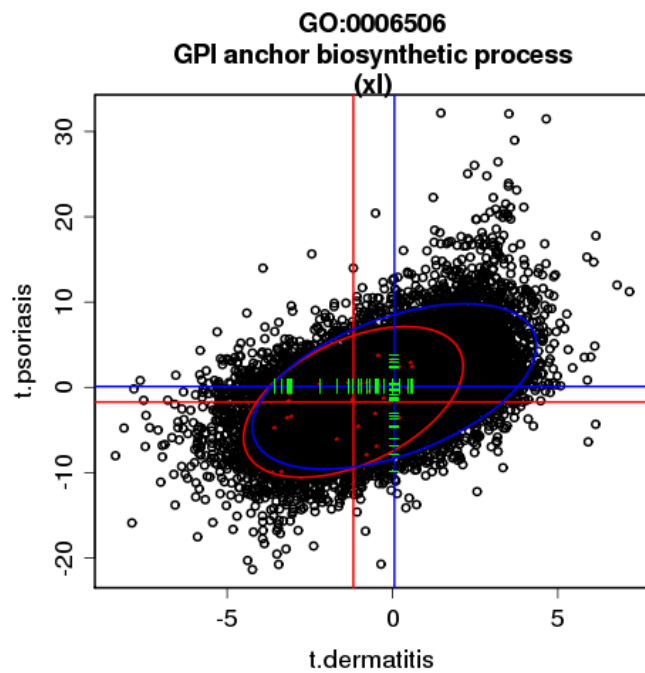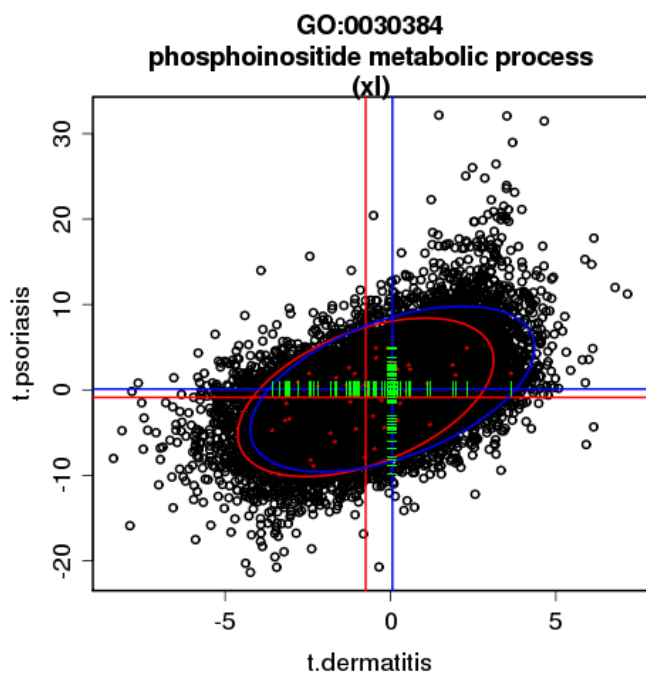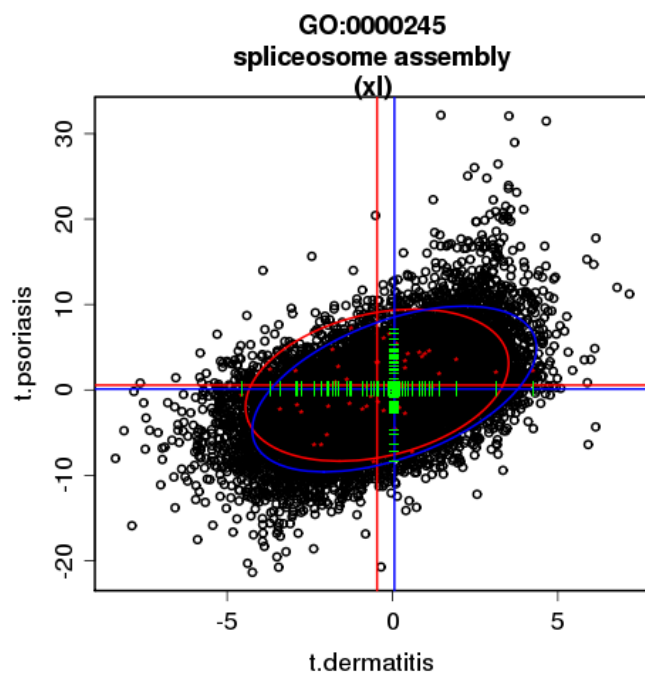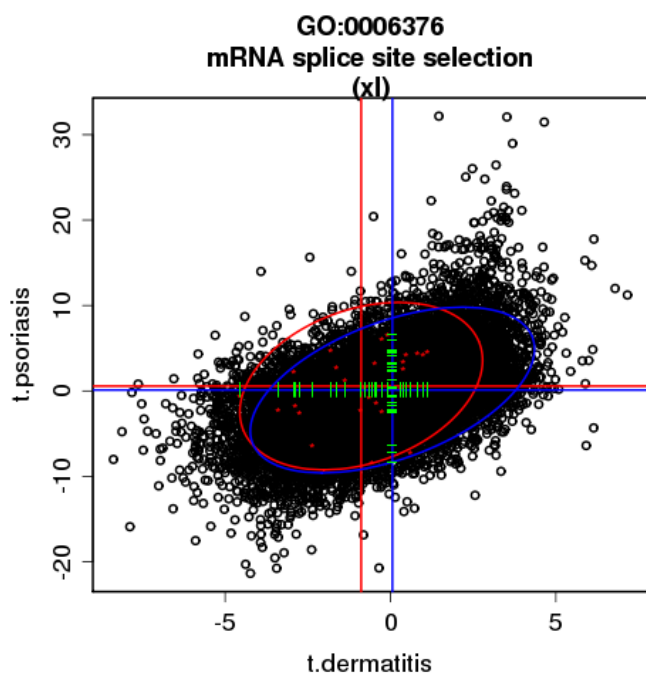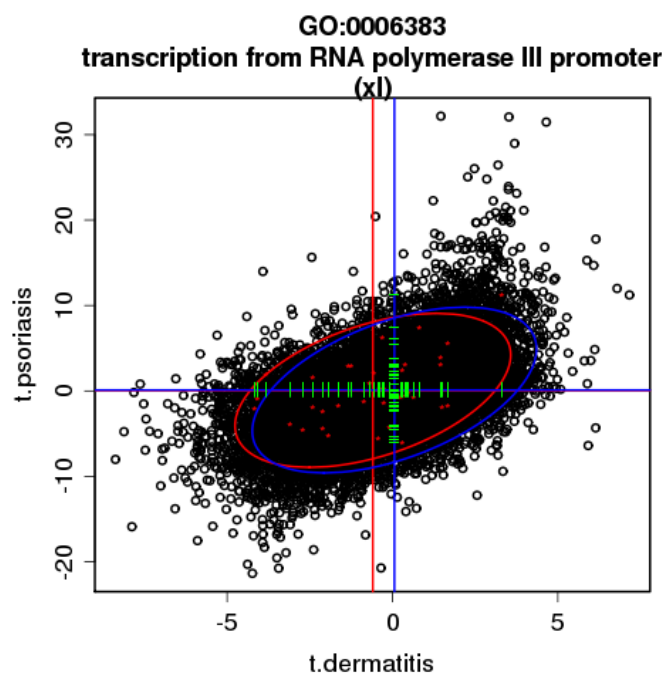

GO:0009081

branched chain family amino acid metabolic process

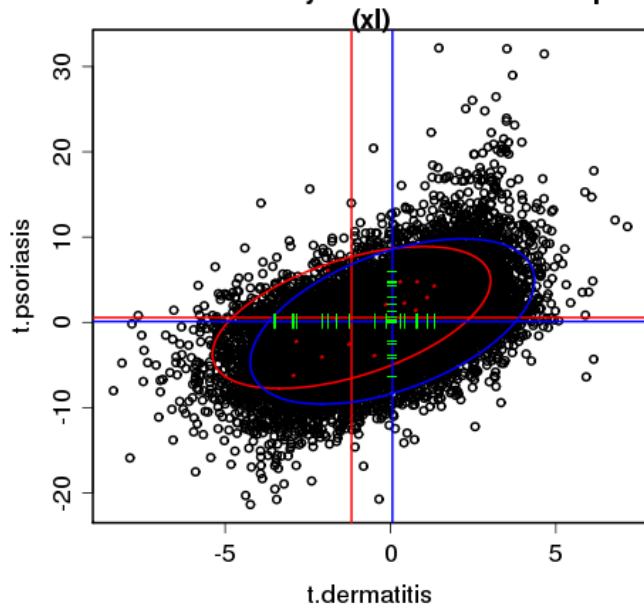

GO:0016126

sterol biosynthetic process

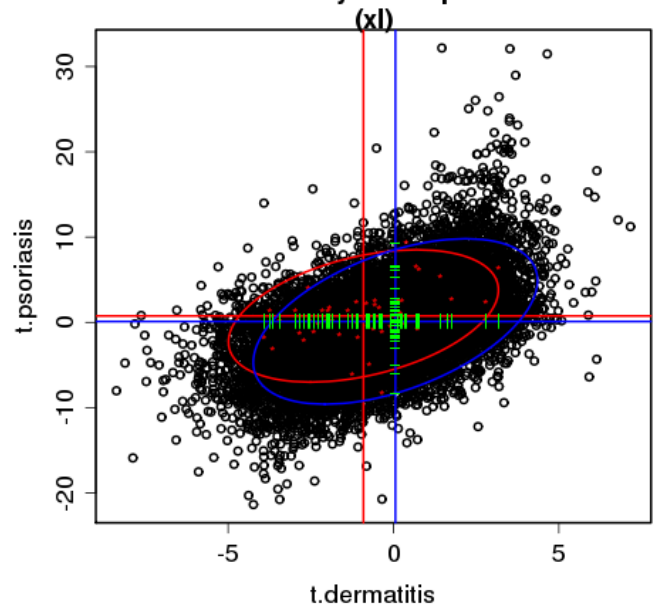

GO:0006695

cholesterol biosynthetic process

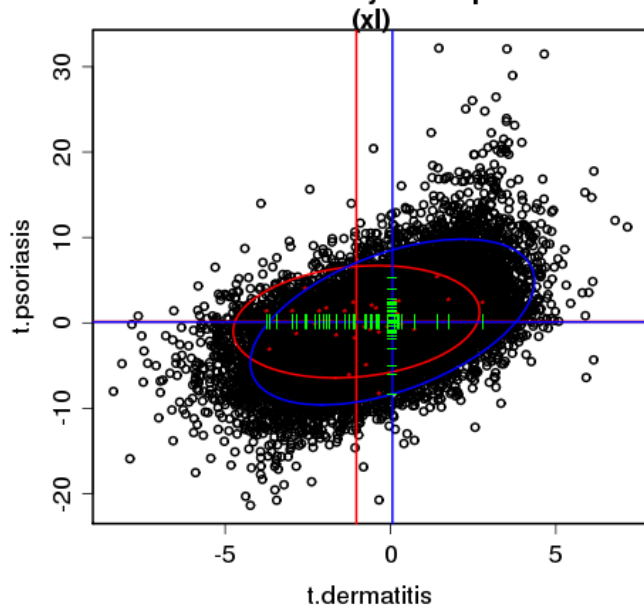

GO:0048515

spermatid differentiation

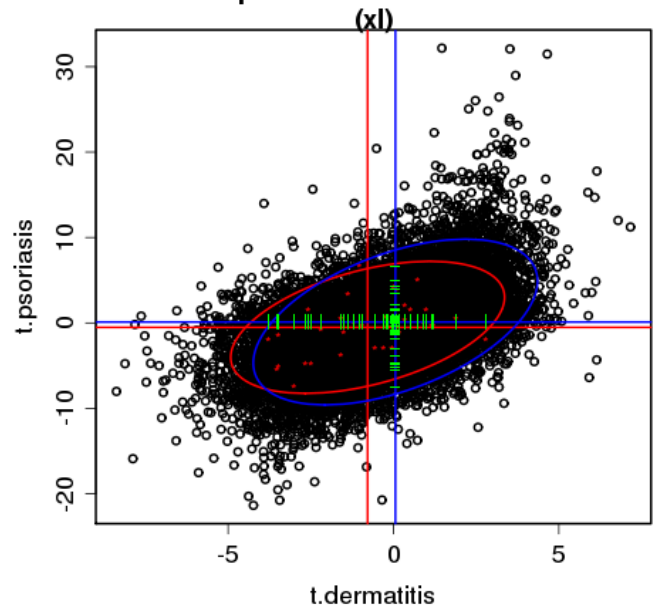

GO:0015669

gas transport

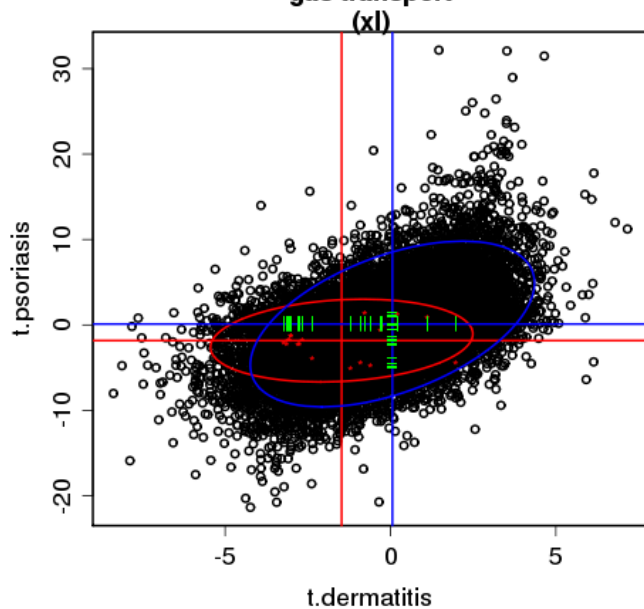

GO:0015671

oxygen transport

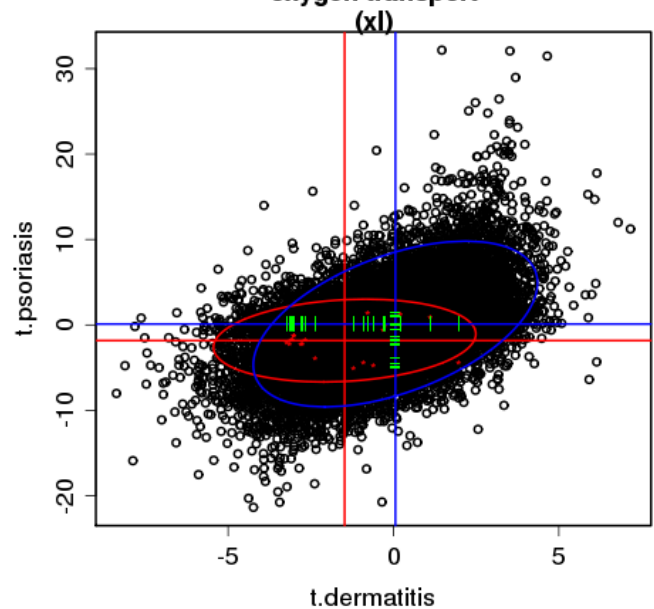

**GO:0010212**  
**response to ionizing radiation**

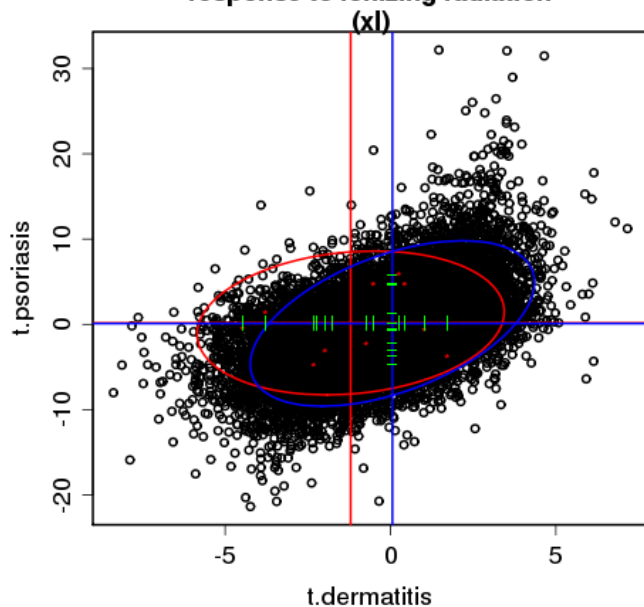

**GO:0007031**  
**peroxisome organization and biogenesis**

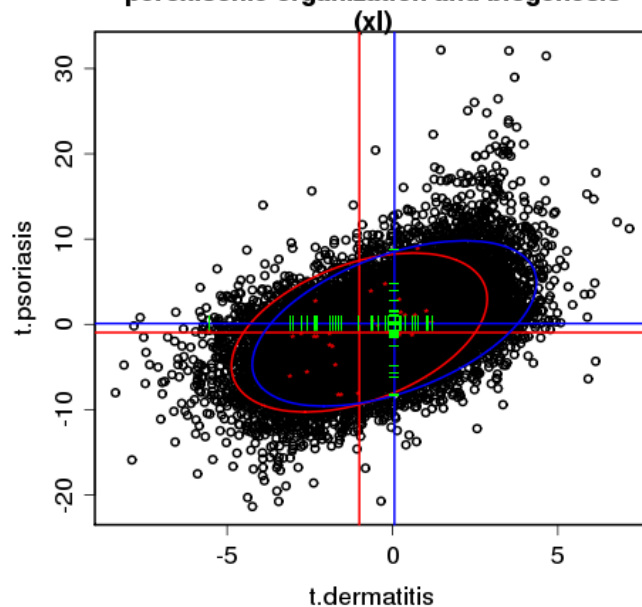

**GO:0001542**  
**ovulation from ovarian follicle**

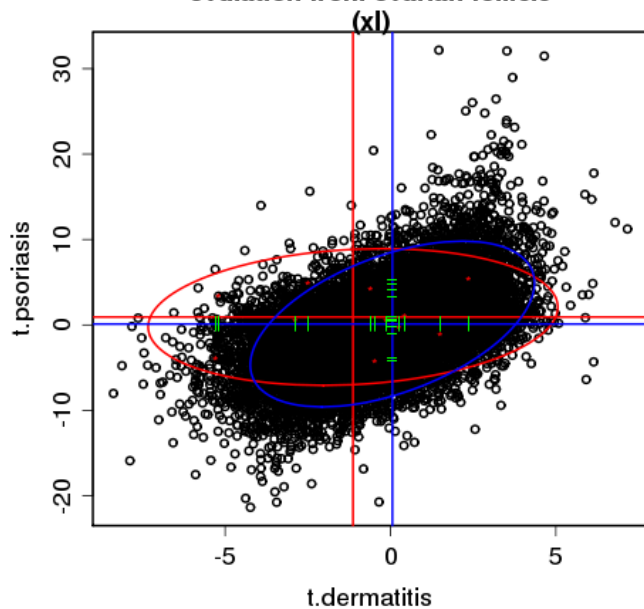

**GO:0030728**  
**ovulation**

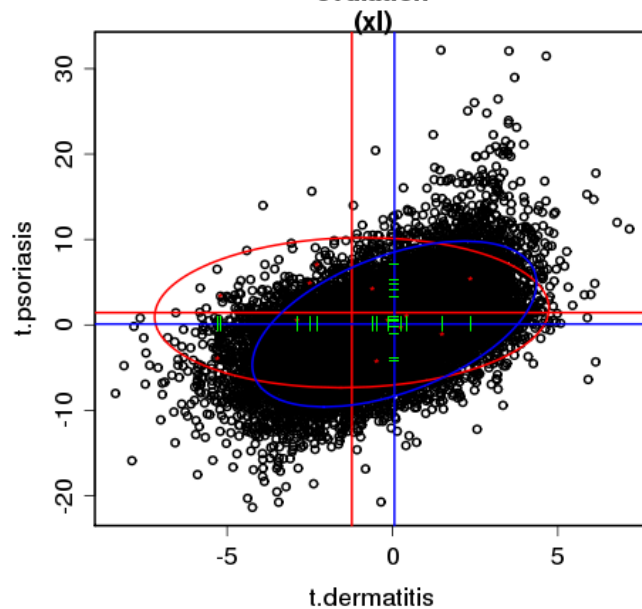

**GO:0006414**  
**translational elongation**

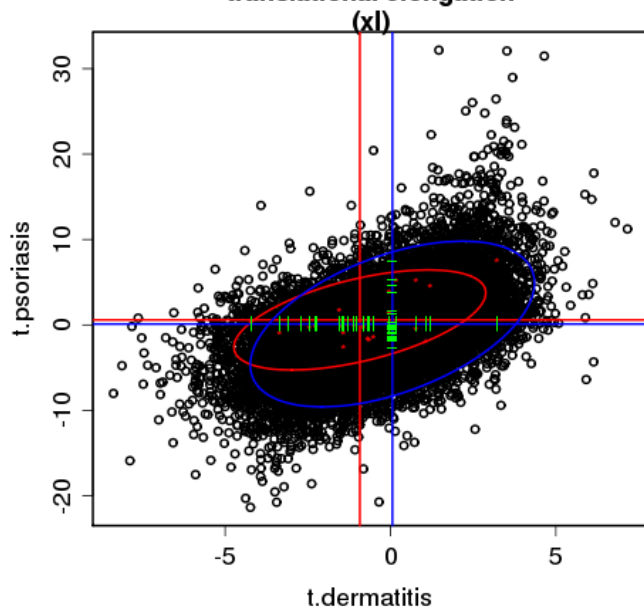

**GO:0006163**  
**purine nucleotide metabolic process**

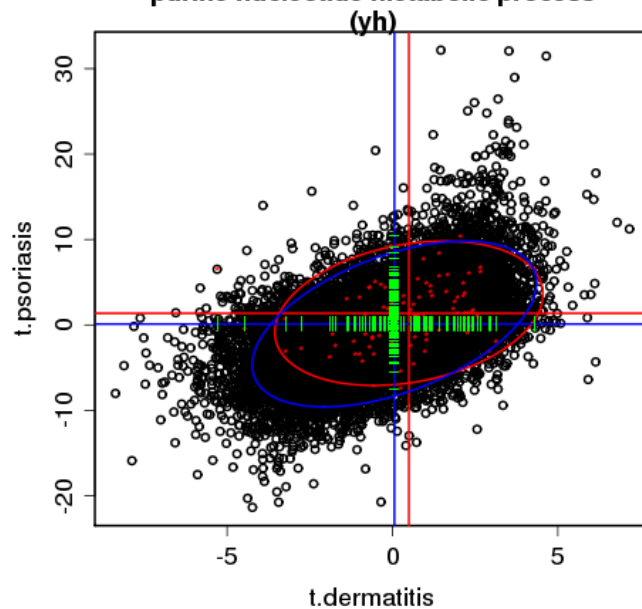



GO:0006144  
purine base metabolic process  
(yh)

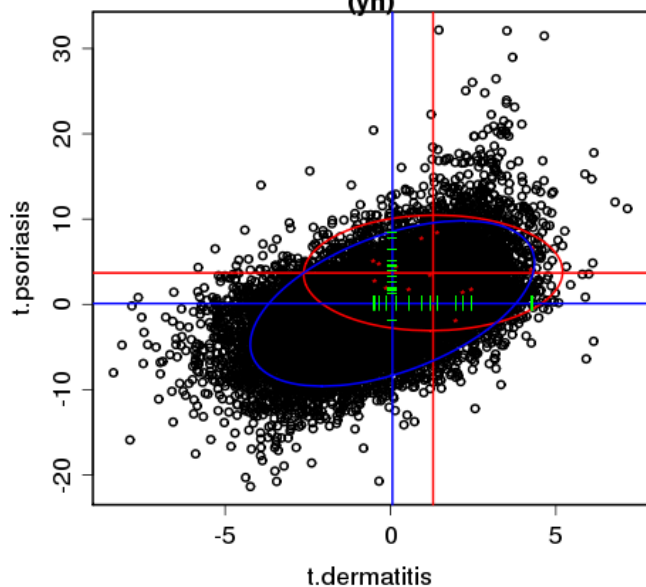

GO:0009259  
ribonucleotide metabolic process  
(yh)

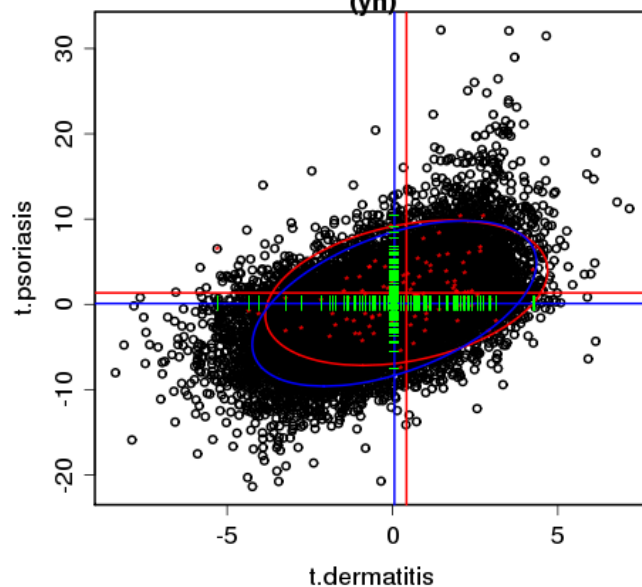

GO:0045944  
positive regulation of transcription from RNA polymerase II p  
(yh)

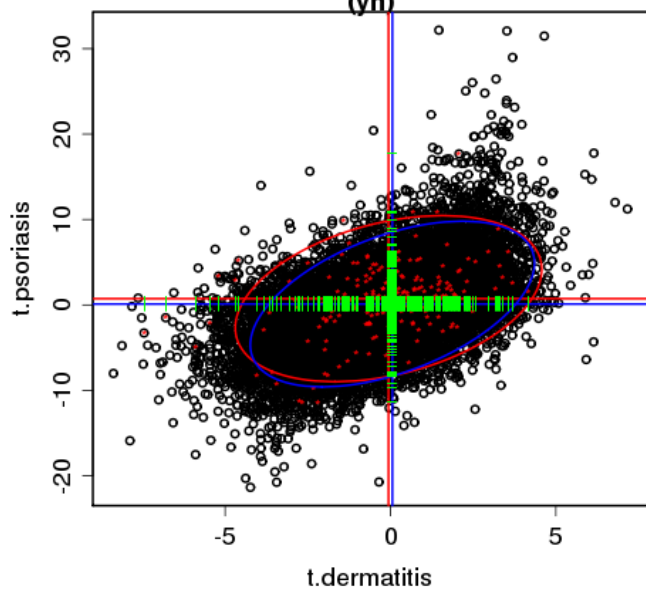

GO:0006520  
amino acid metabolic process  
(yh)

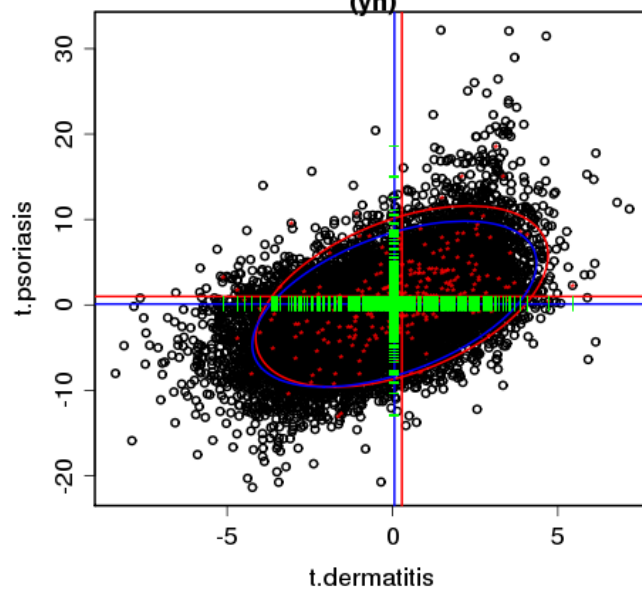

GO:0032268  
regulation of cellular protein metabolic process  
(yh)

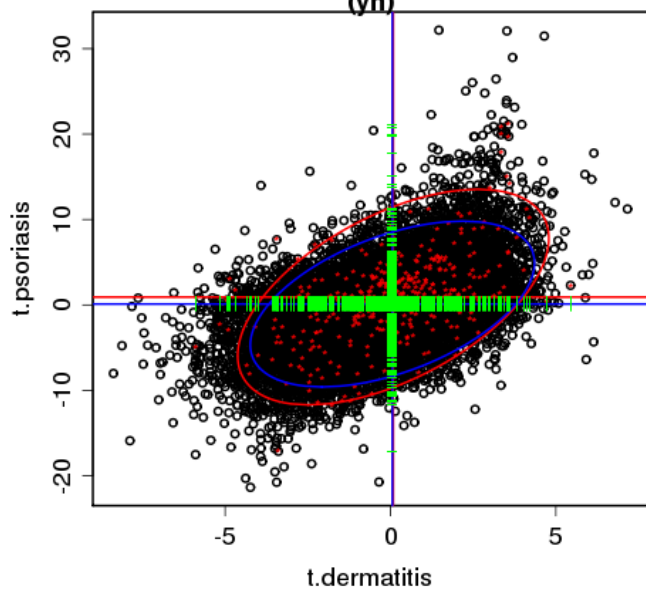

GO:0032270  
positive regulation of cellular protein metabolic process  
(yh)

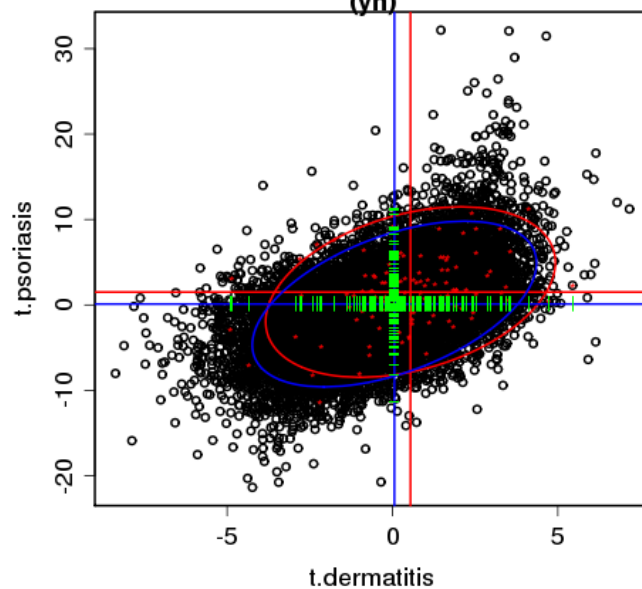



**GO:0051246**  
**regulation of protein metabolic process**  
(yh)

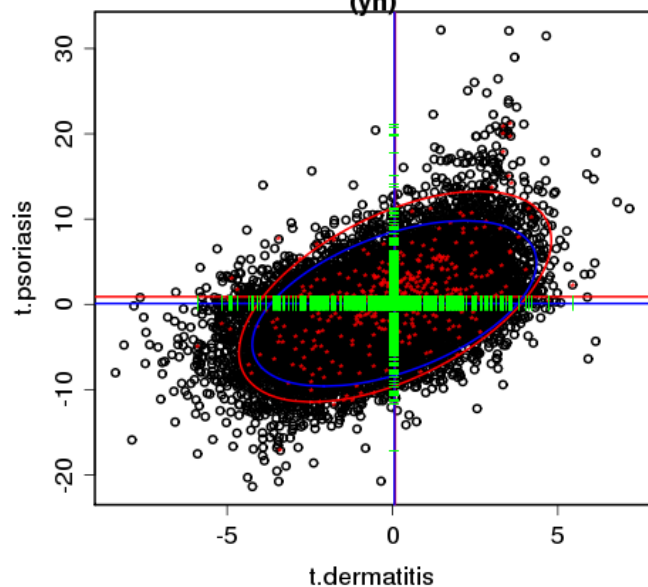

**GO:0051247**  
**positive regulation of protein metabolic process**  
(yh)

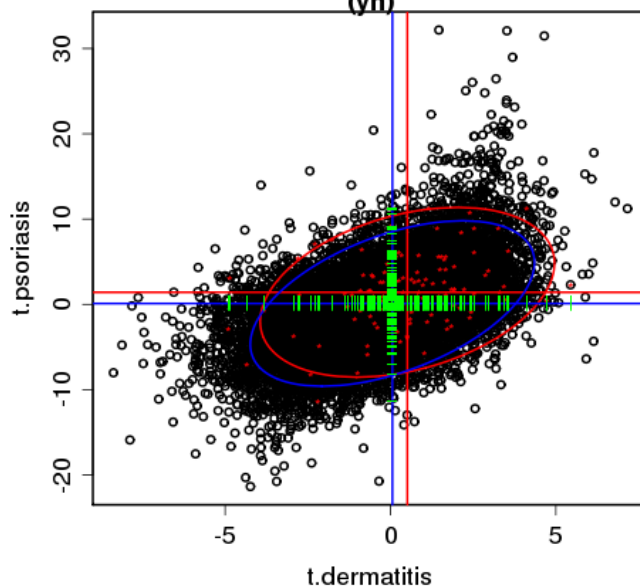

**GO:0009889**  
**regulation of biosynthetic process**  
(yh)

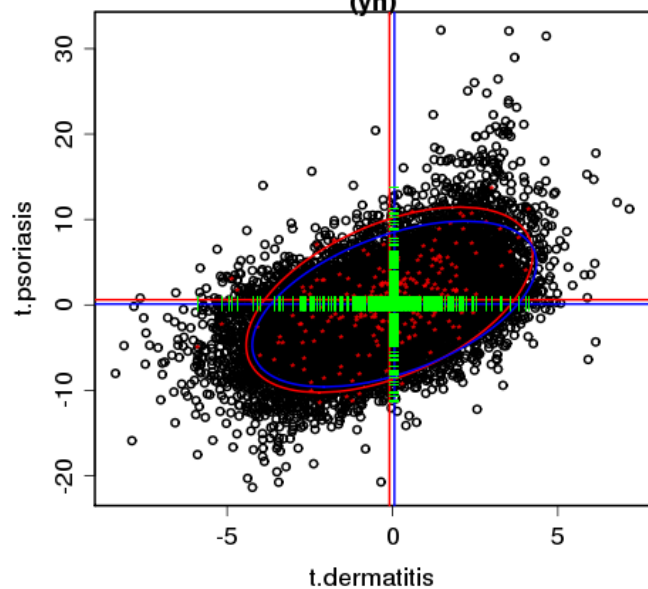

**GO:0031326**  
**regulation of cellular biosynthetic process**  
(yh)

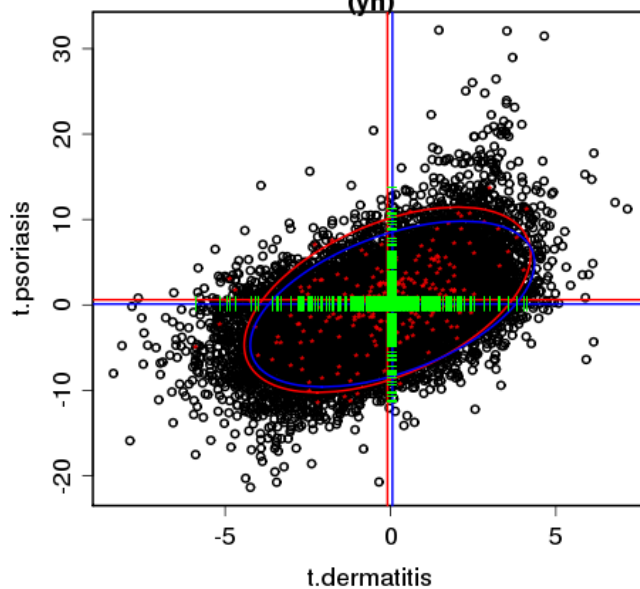

**GO:0001775**  
**cell activation**  
(yh)

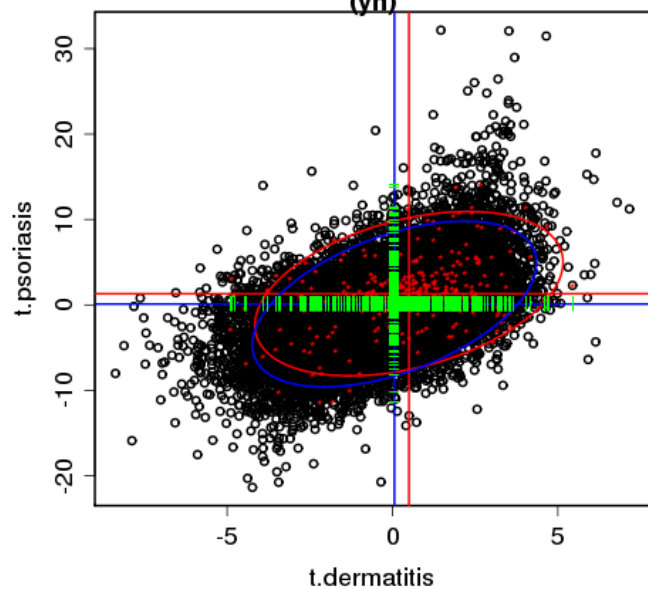

**GO:0045321**  
**leukocyte activation**  
(yh)

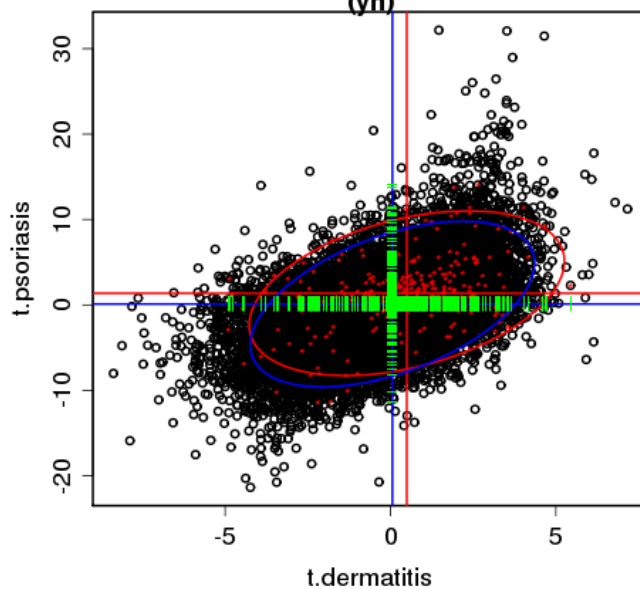

GO:0046649  
lymphocyte activation  
(yh)

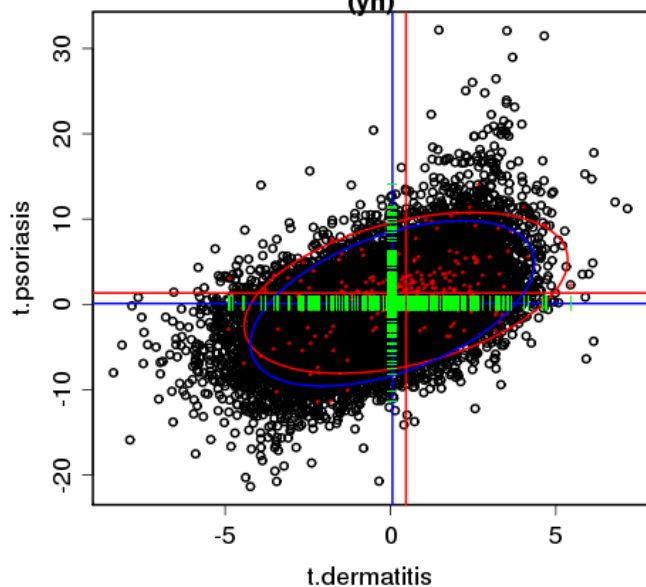

GO:0050854  
regulation of antigen receptor-mediated signaling pathw  
(yh)

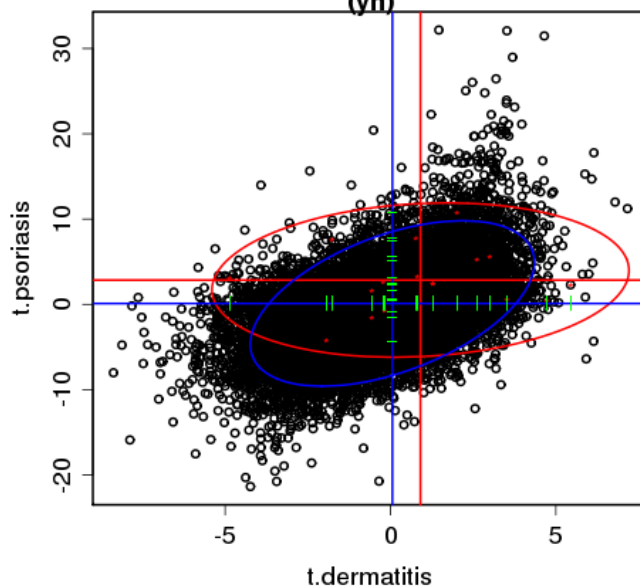

GO:0050856  
regulation of T cell receptor signaling pathway  
(yh)

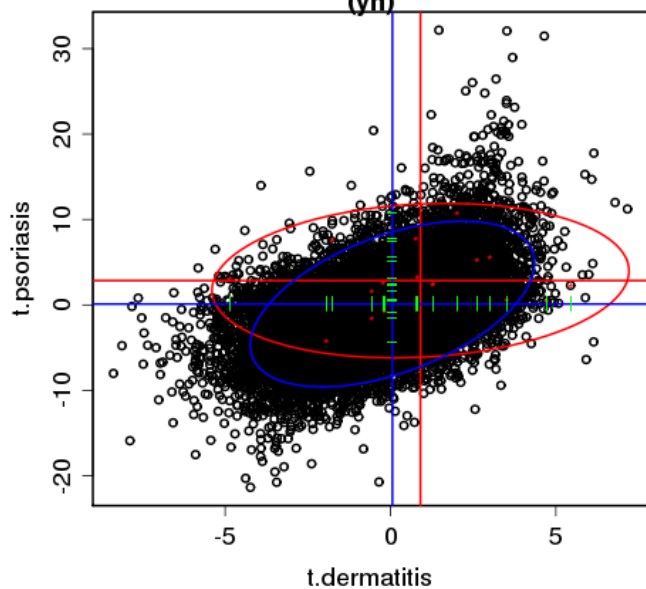

GO:0051094  
positive regulation of developmental process  
(yh)

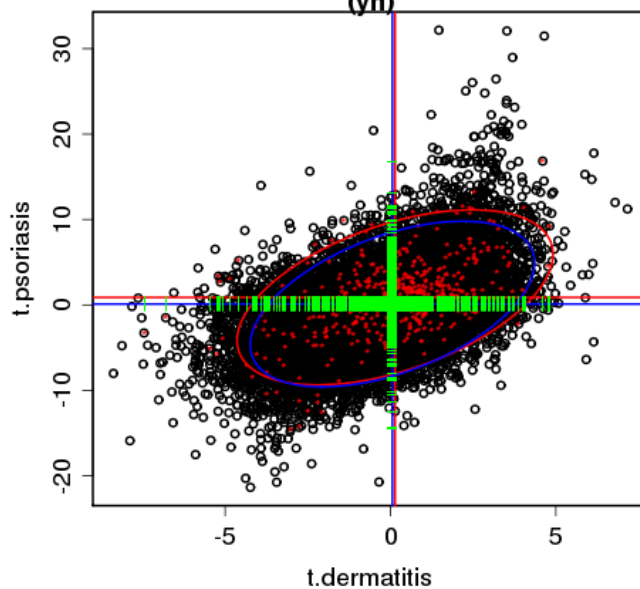

GO:0043068  
positive regulation of programmed cell death  
(yh)

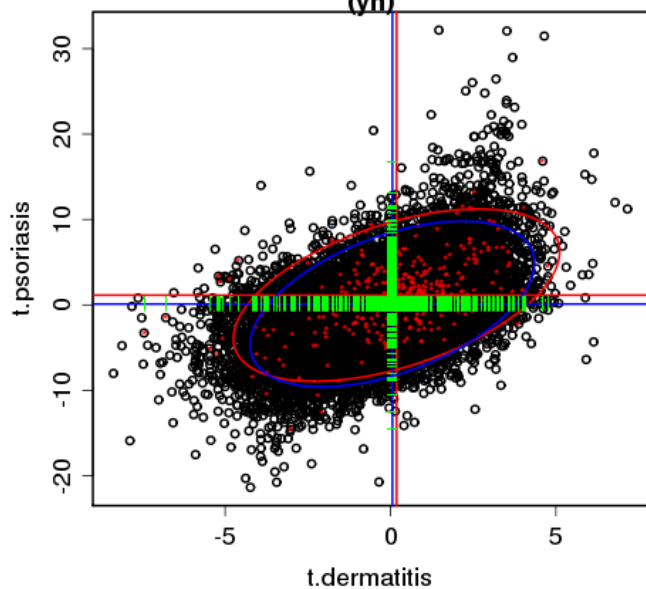

GO:0006417  
regulation of translation  
(yh)

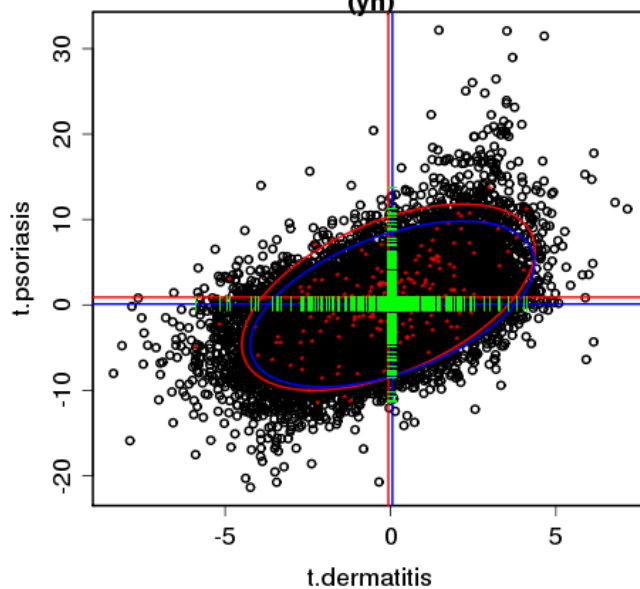

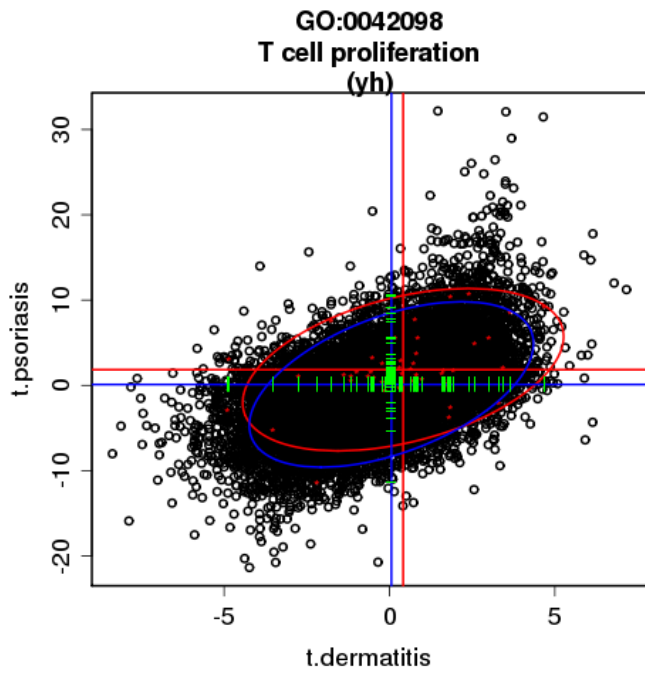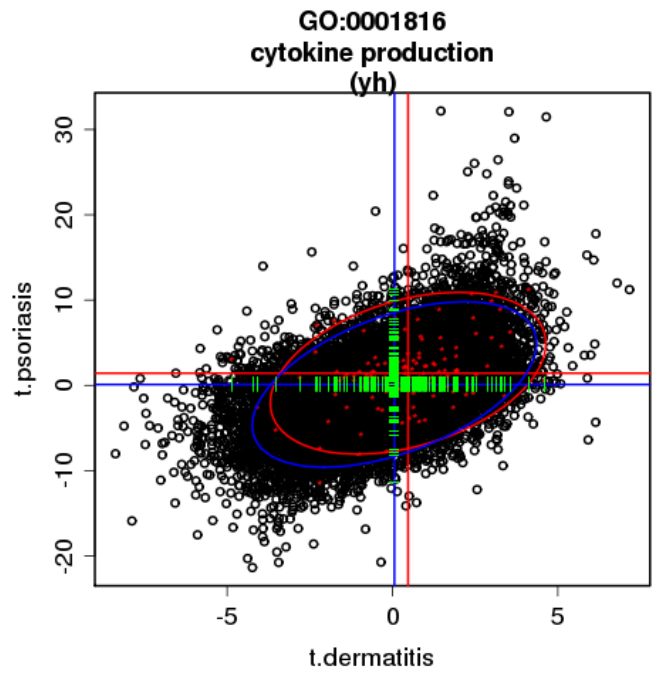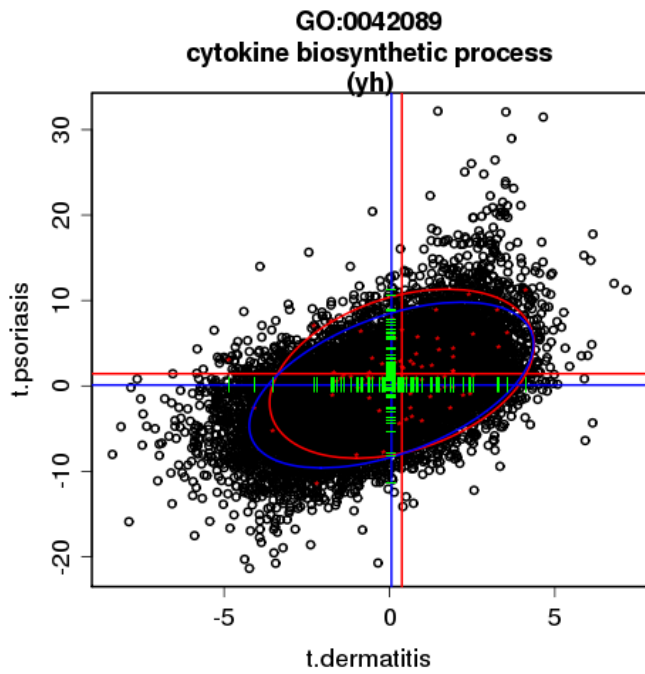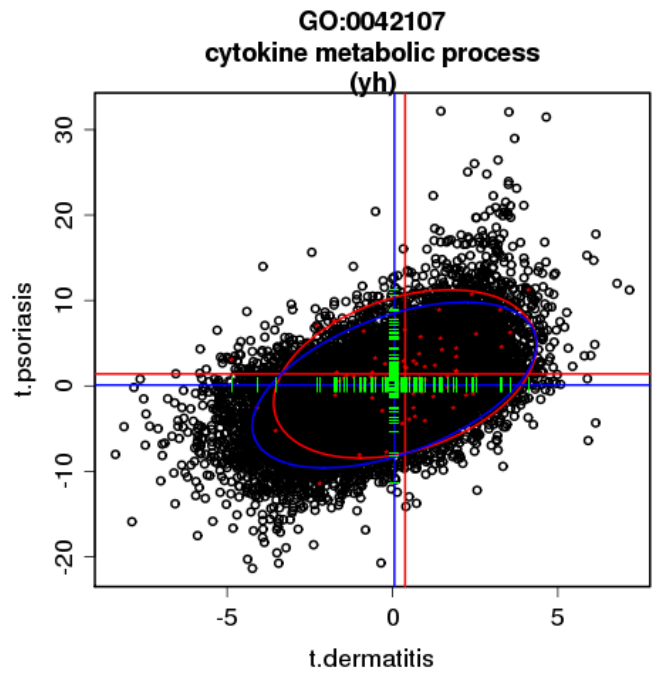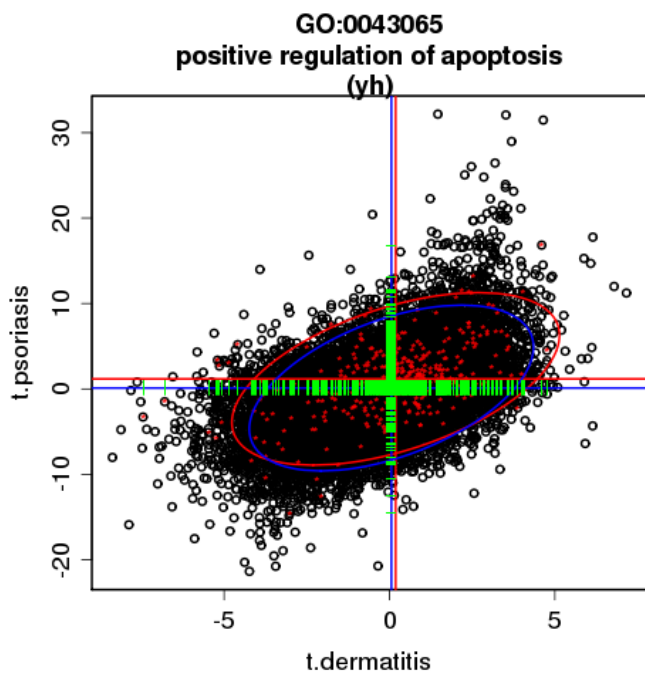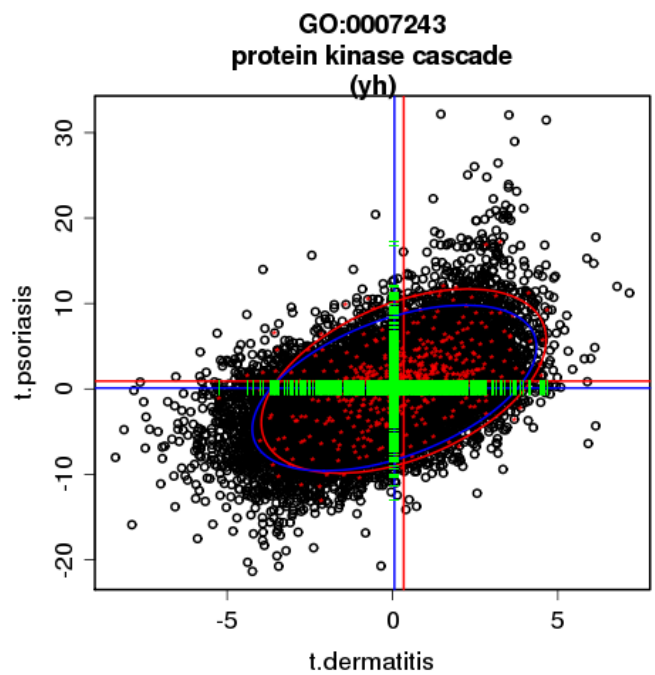

**GO:0051052**  
**regulation of DNA metabolic process**  
(yh)

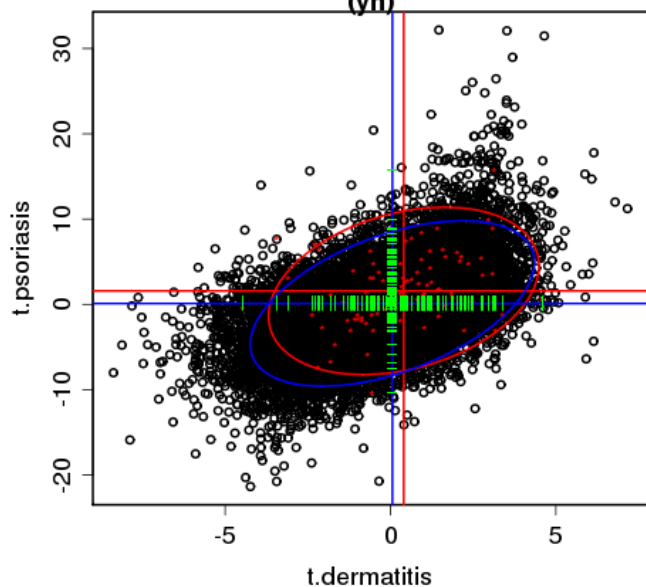

**GO:0043388**  
**positive regulation of DNA binding**  
(yh)

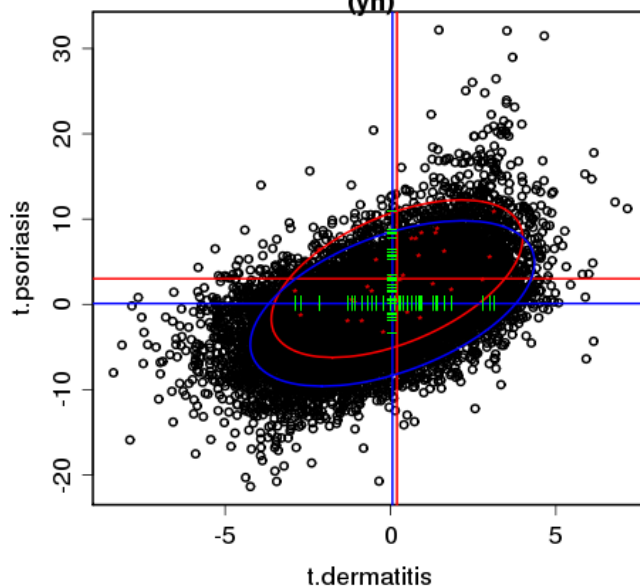

**GO:0051090**  
**regulation of transcription factor activity**  
(yh)

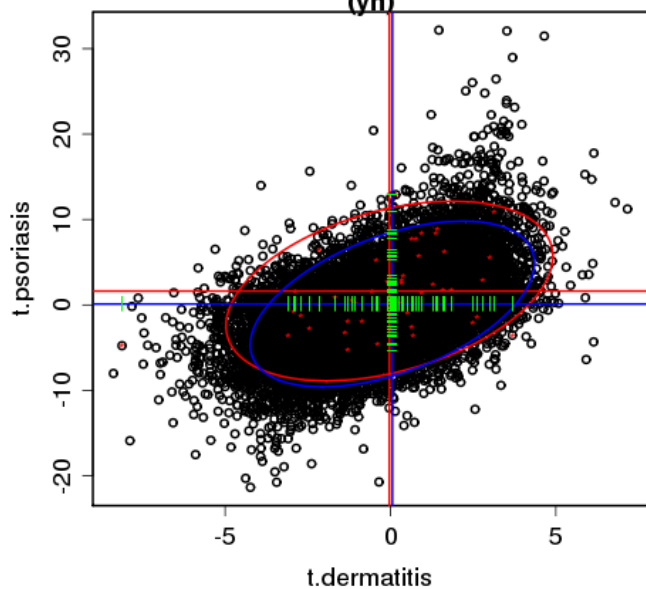

**GO:0051091**  
**positive regulation of transcription factor activity**  
(yh)

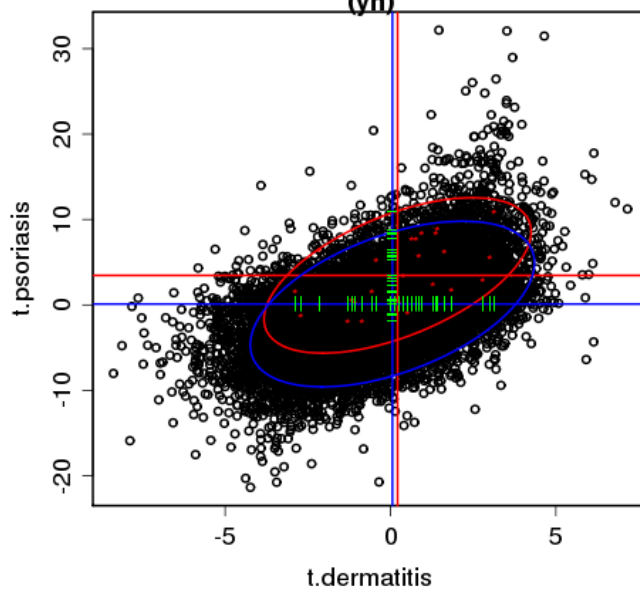

**GO:0051099**  
**positive regulation of binding**  
(yh)

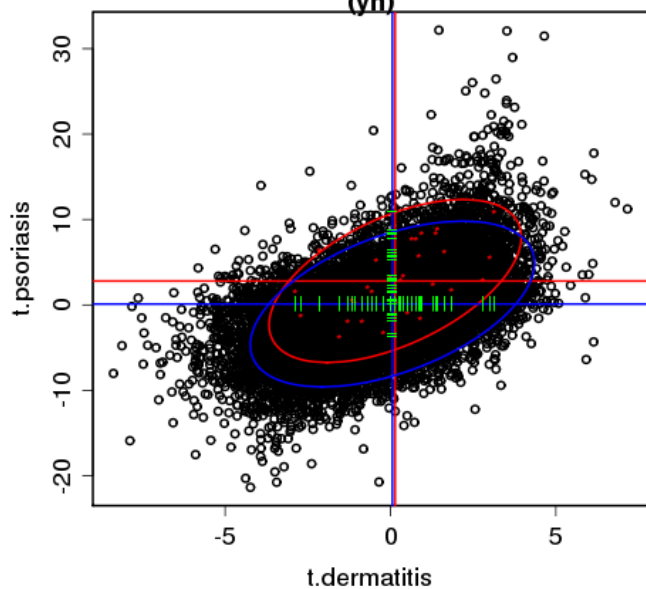

**GO:0051101**  
**regulation of DNA binding**  
(yh)

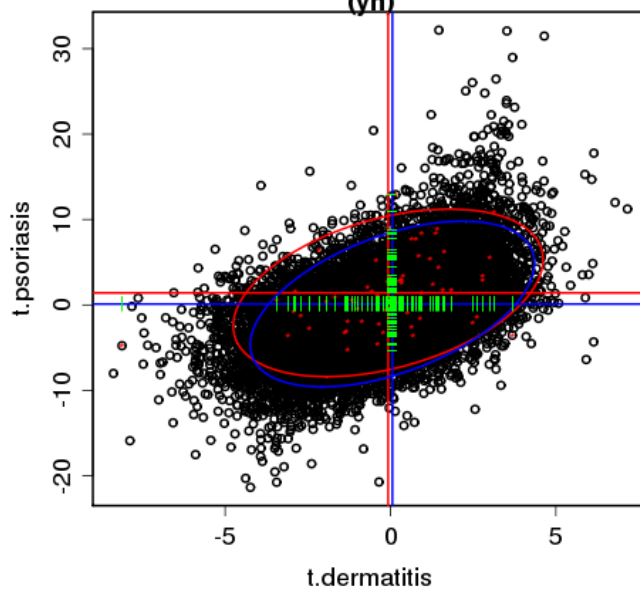

GO:0007249  
I-kappaB kinase/NF-kappaB cascade  
(yh)

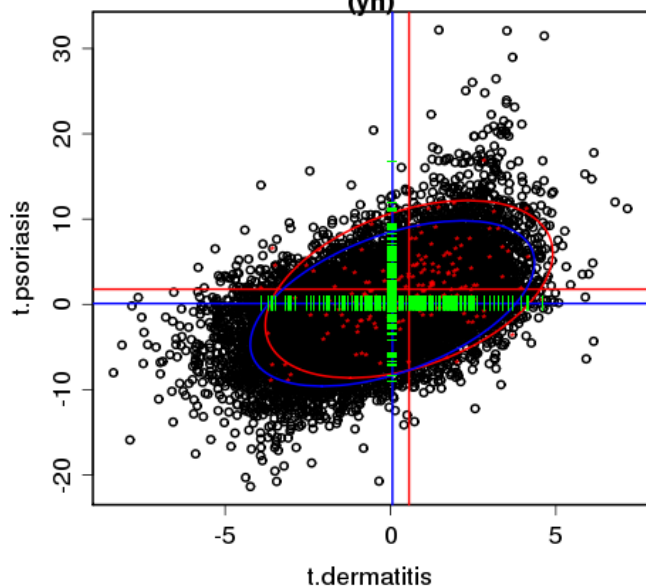

GO:0006282  
regulation of DNA repair  
(yh)

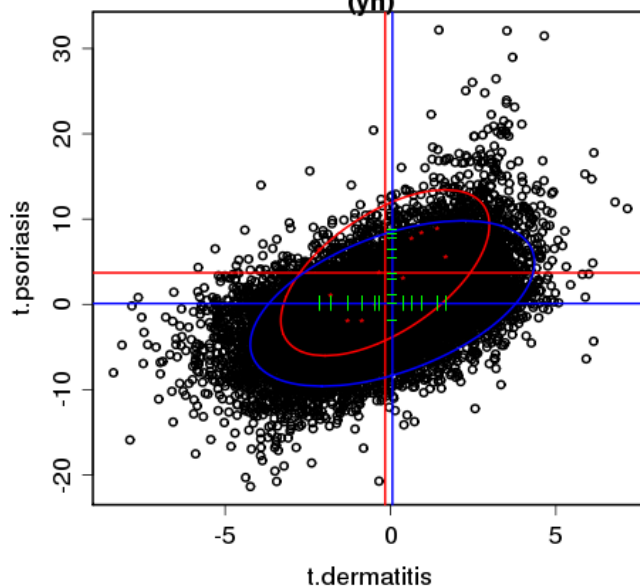

GO:0051092  
positive regulation of NF-kappaB transcription factor acti  
(yh)

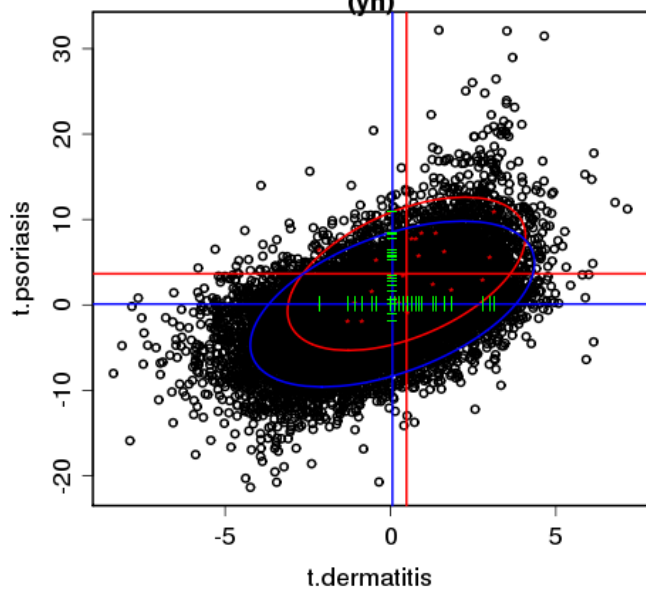

GO:0030099  
myeloid cell differentiation  
(yh)

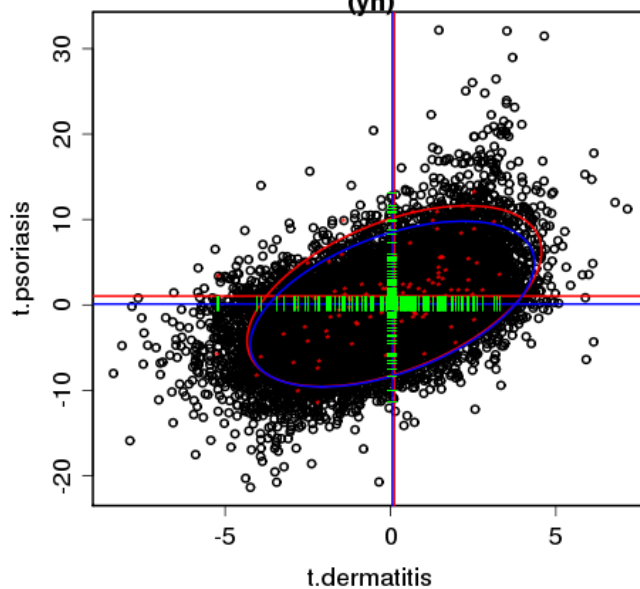

GO:0030218  
erythrocyte differentiation  
(yh)

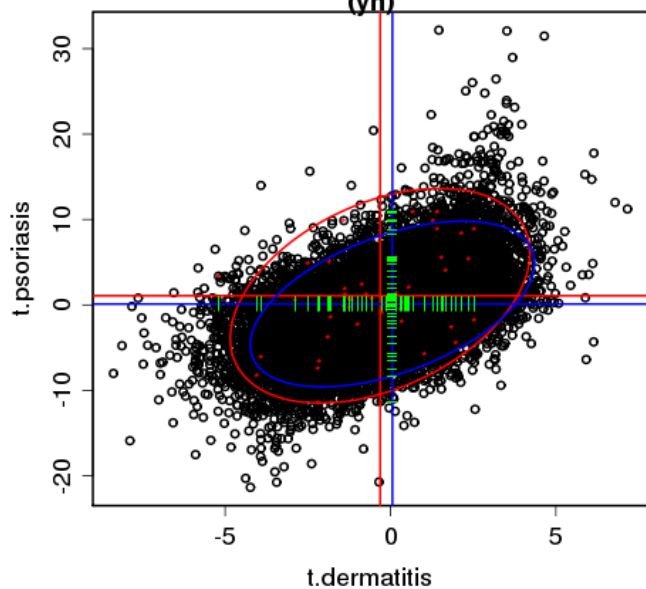

GO:0034101  
erythrocyte homeostasis  
(yh)

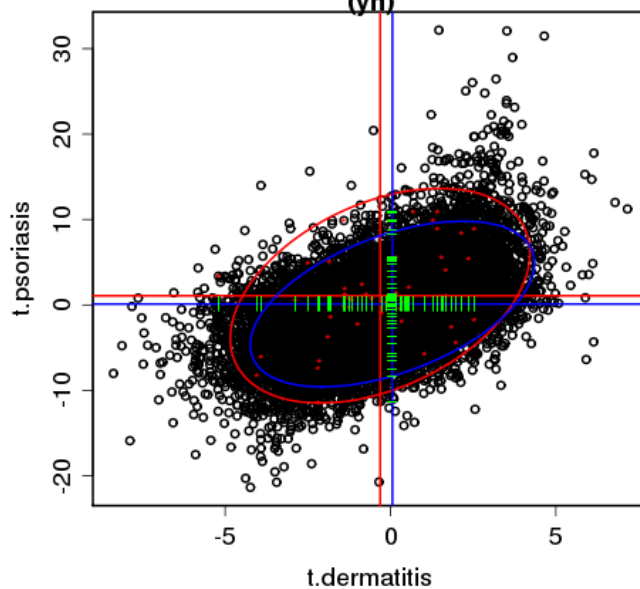



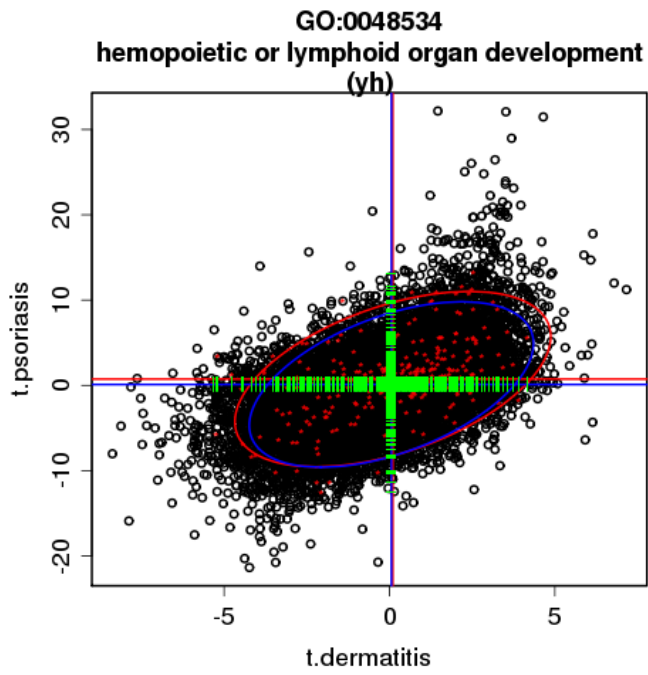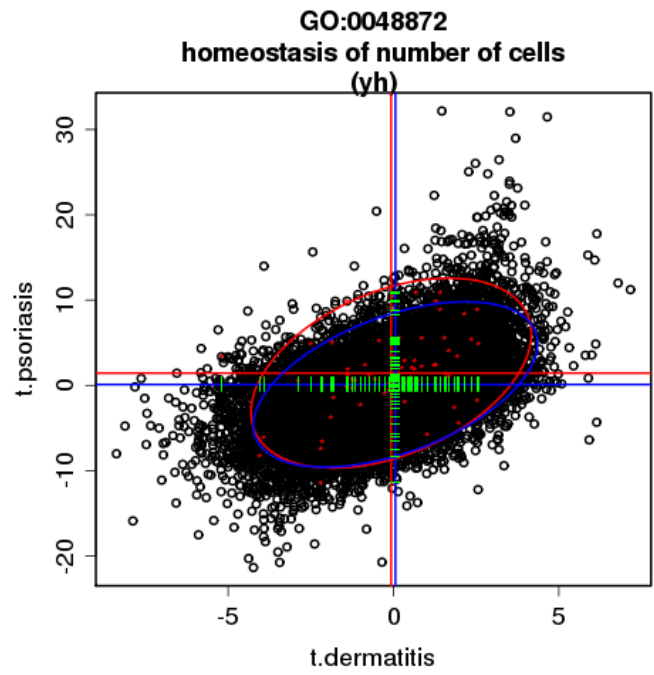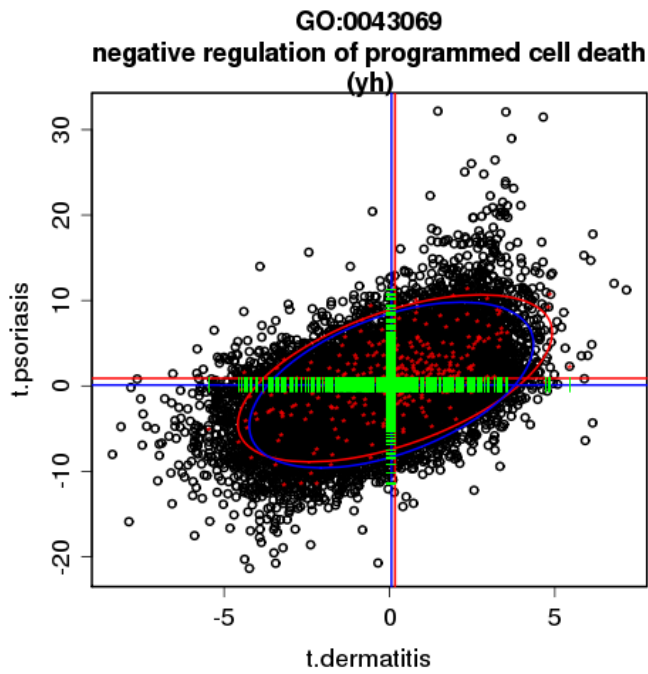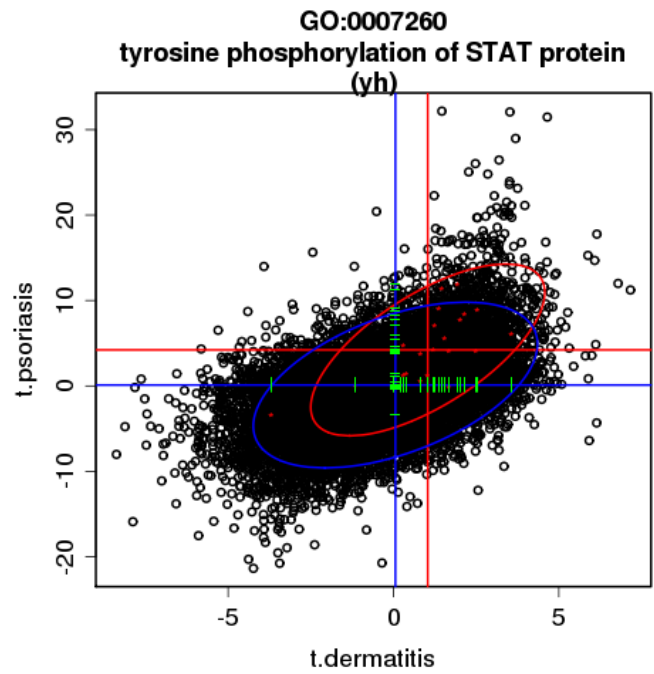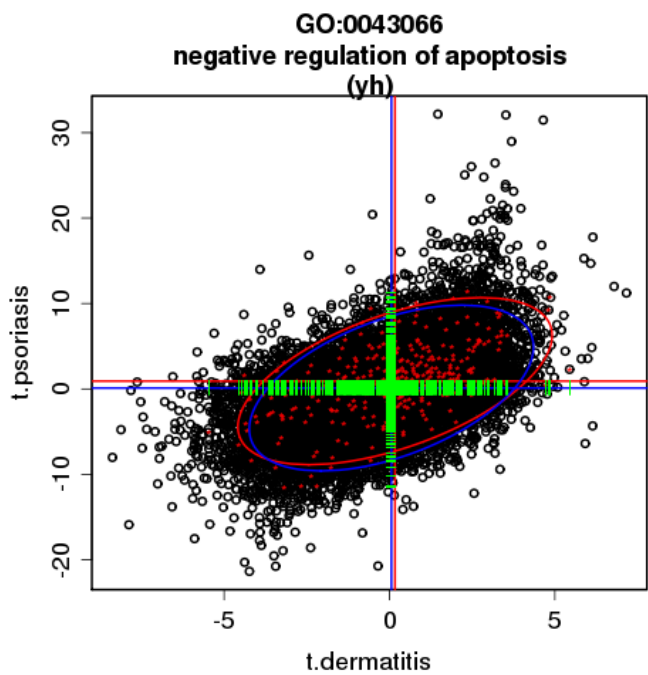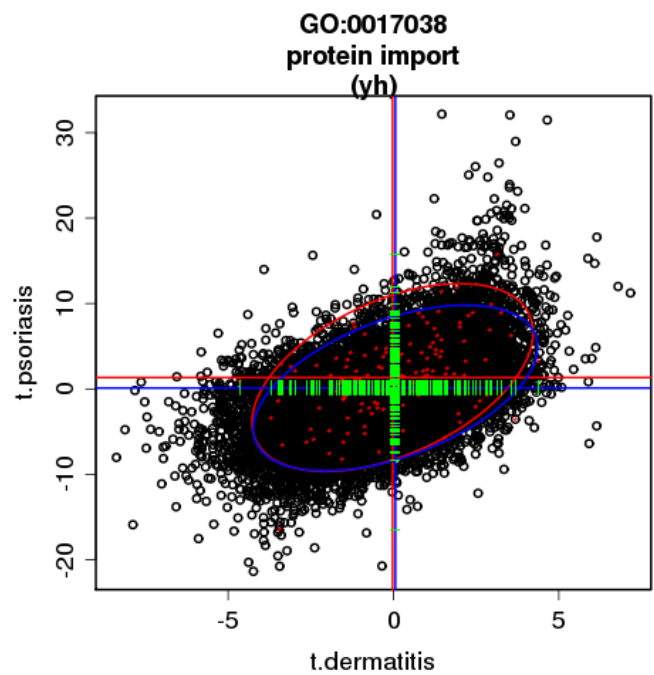



GO:0051170  
nuclear import  
(yh)

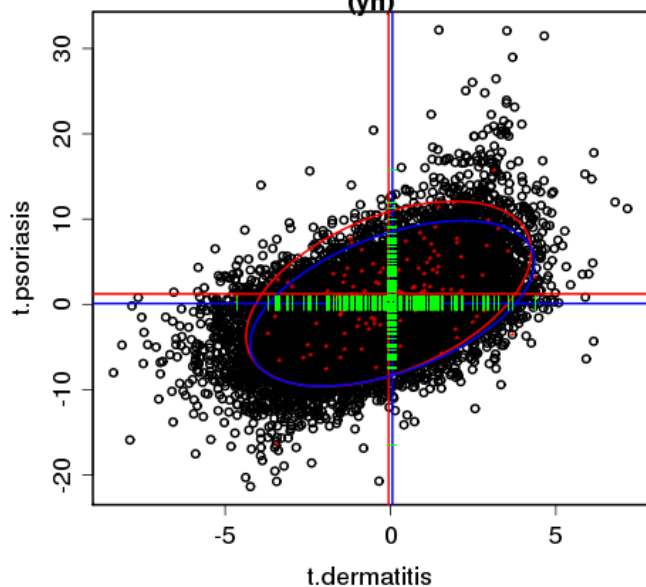

GO:0009057  
macromolecule catabolic process  
(yh)

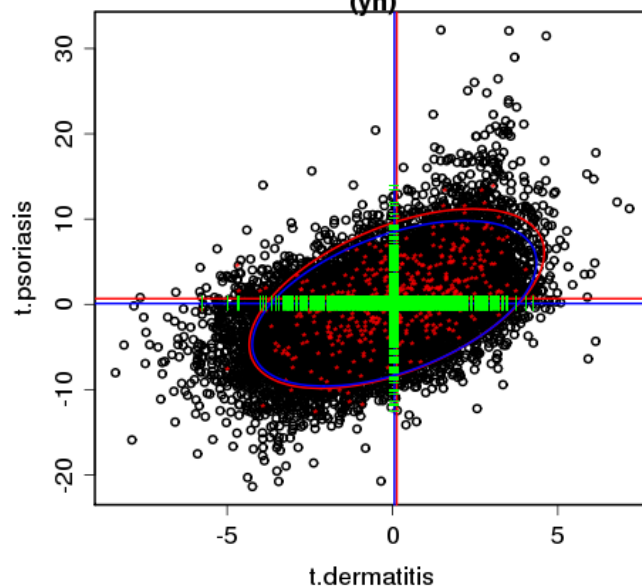

GO:0022404  
molting cycle process  
(yh)

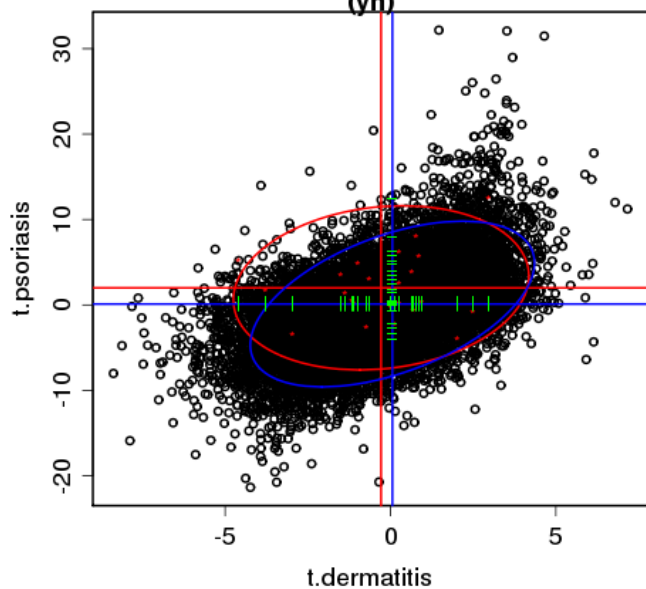

GO:0042303  
molting cycle  
(yh)

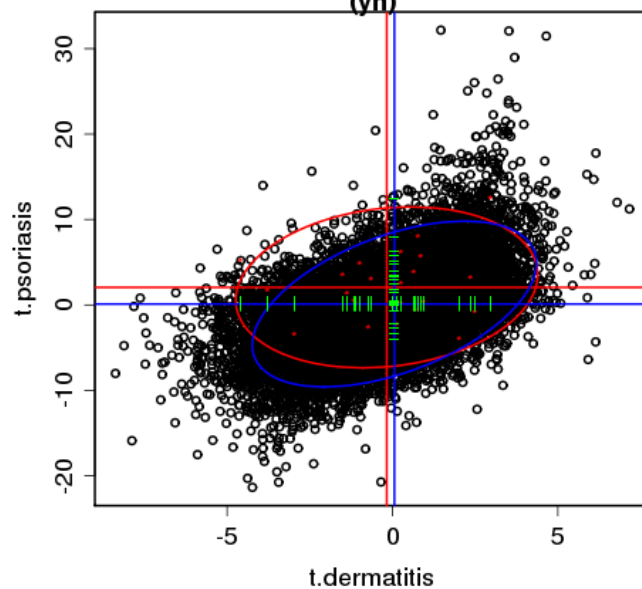

GO:0042633  
hair cycle  
(yh)

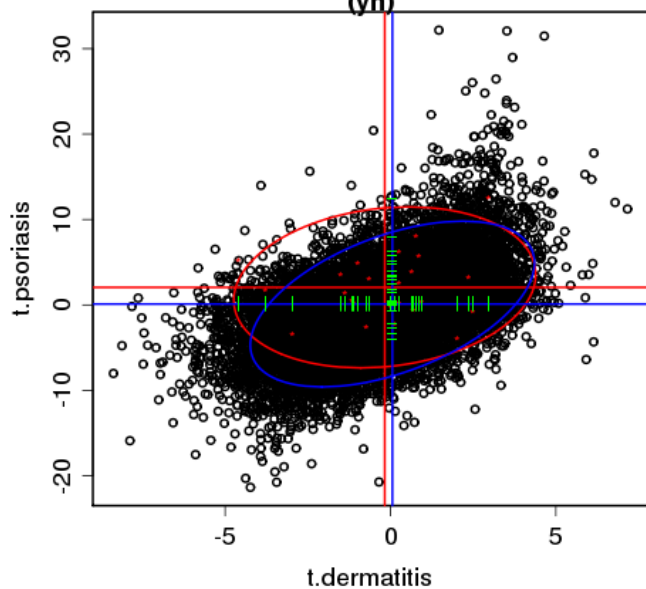

GO:0007005  
mitochondrion organization and biogenesis  
(yh)

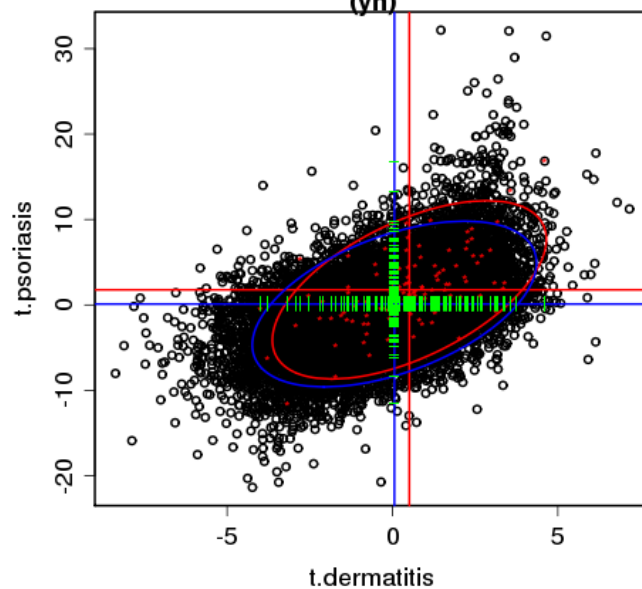

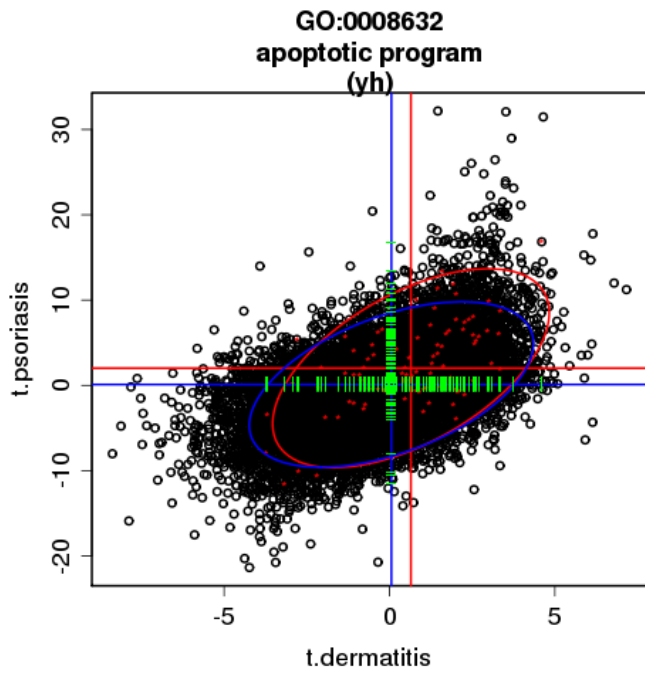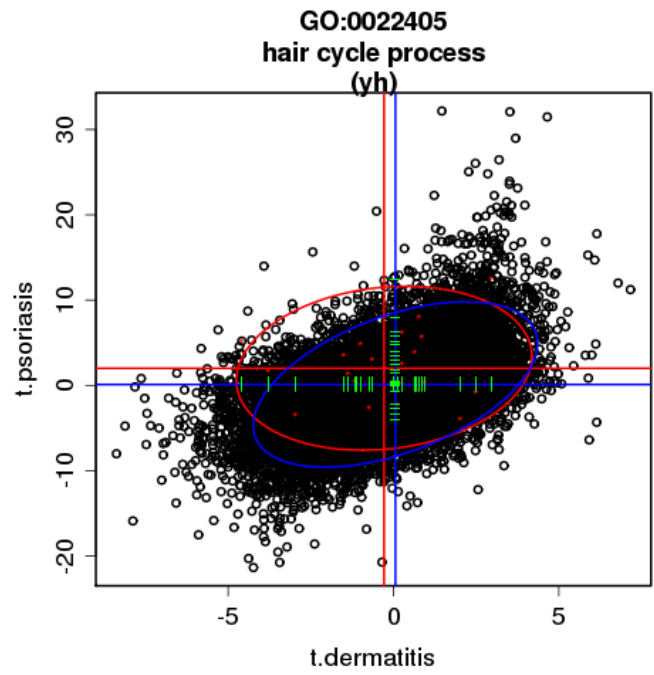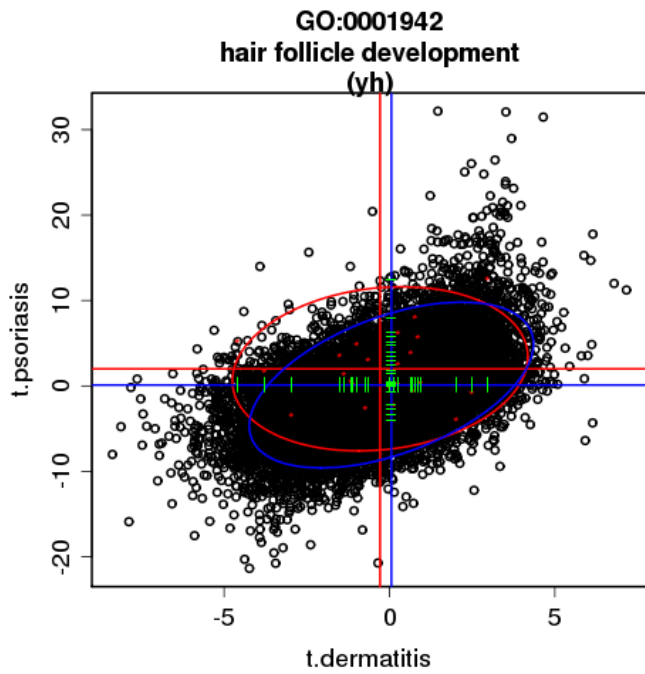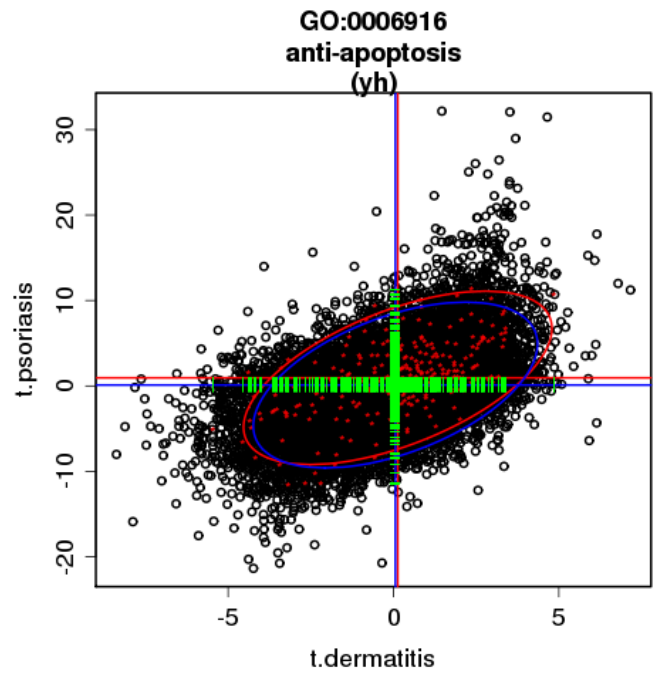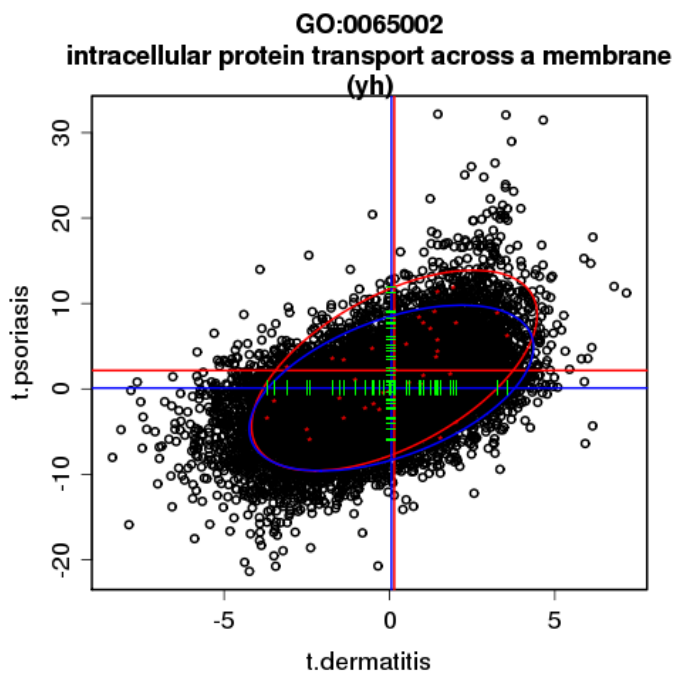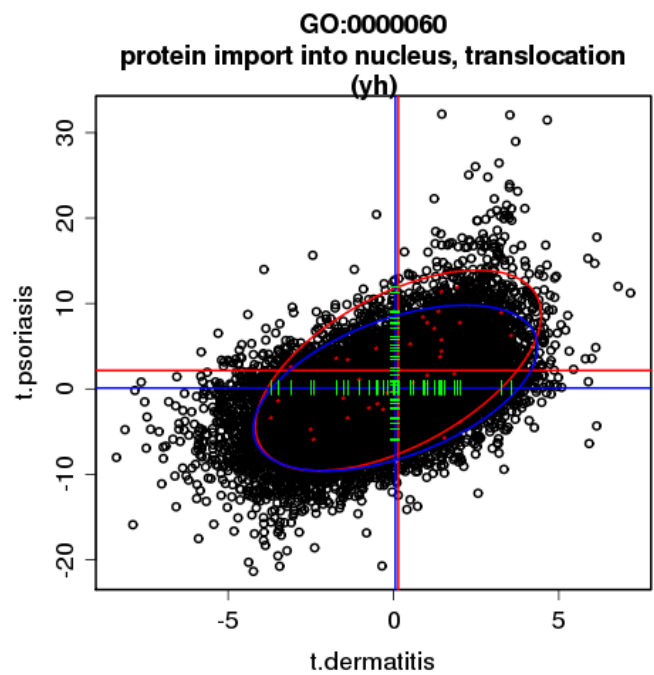

**GO:0009615**  
**response to virus**  
(yh)

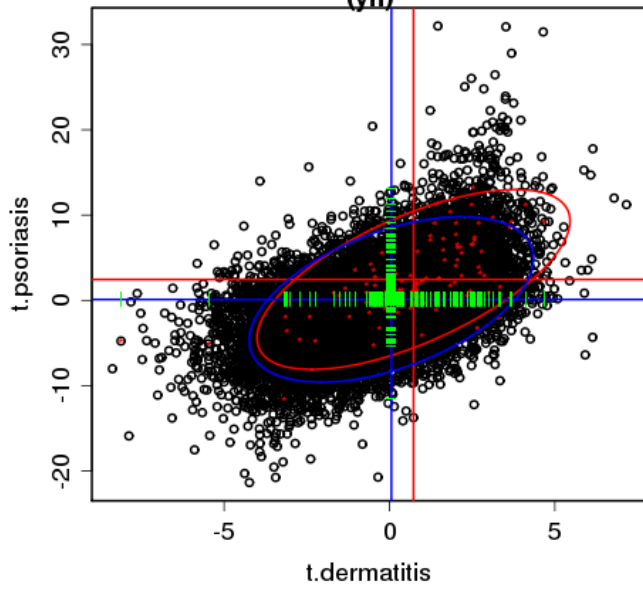

**GO:0006405**  
**RNA export from nucleus**  
(yh)

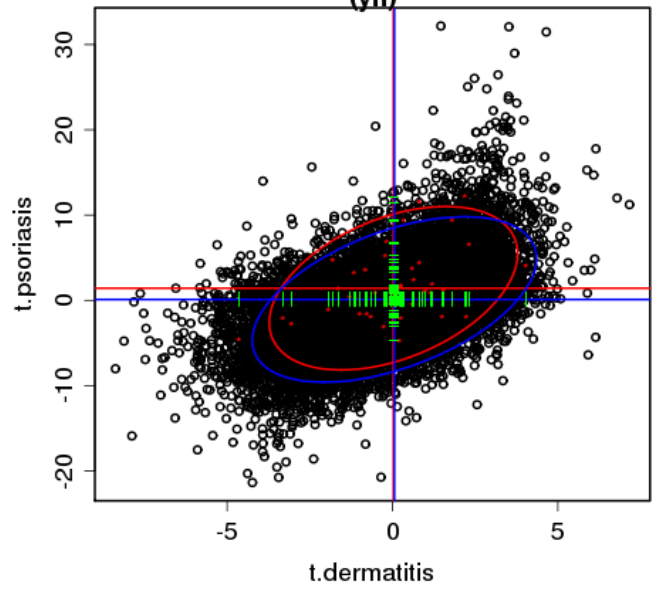

**GO:0051168**  
**nuclear export**  
(yh)

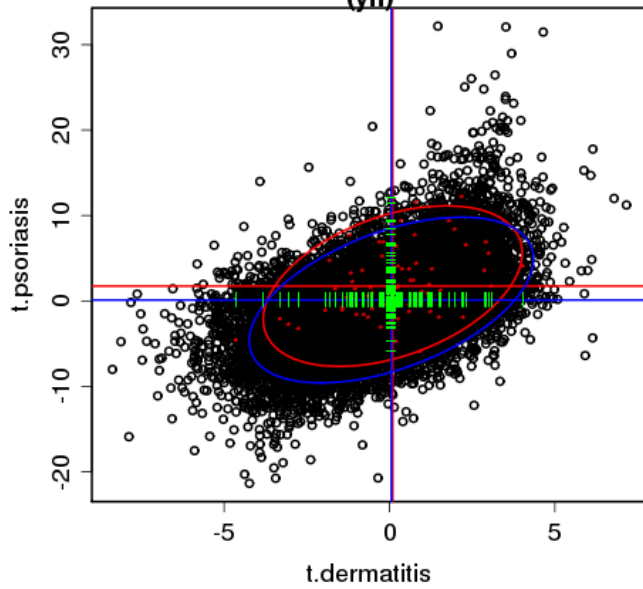

**GO:0012502**  
**induction of programmed cell death**  
(yh)

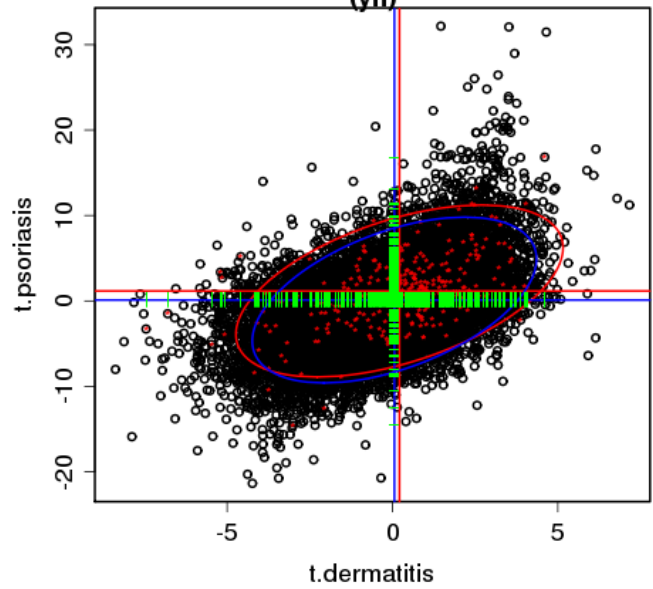

**GO:0051325**  
**interphase**  
(yh)

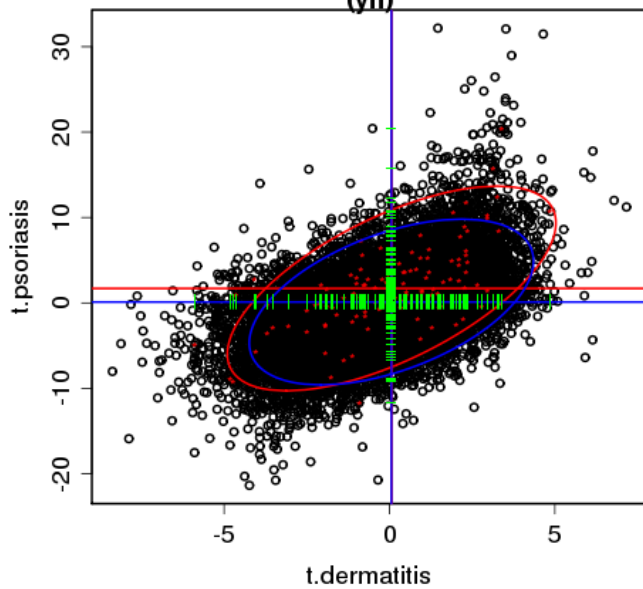

**GO:0051329**  
**interphase of mitotic cell cycle**  
(yh)

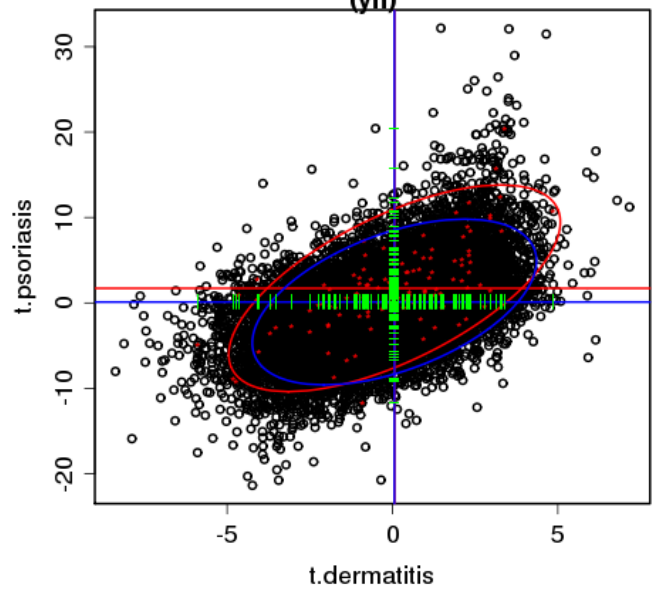

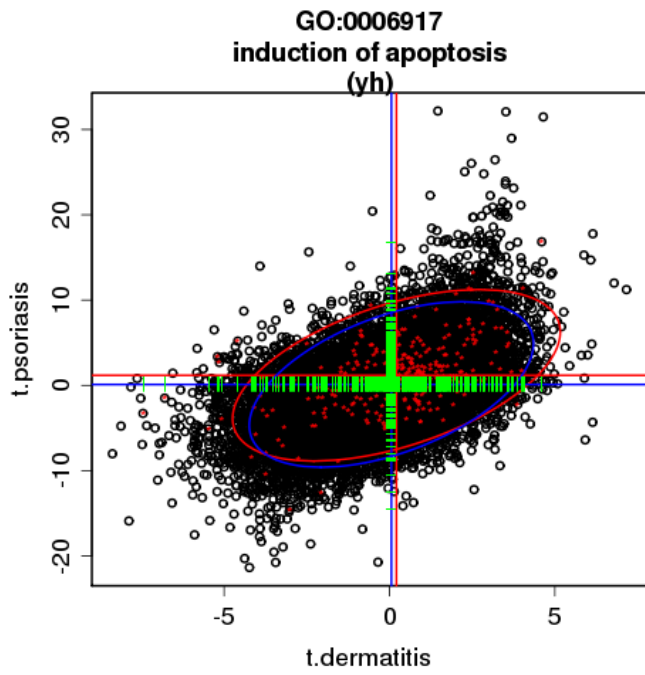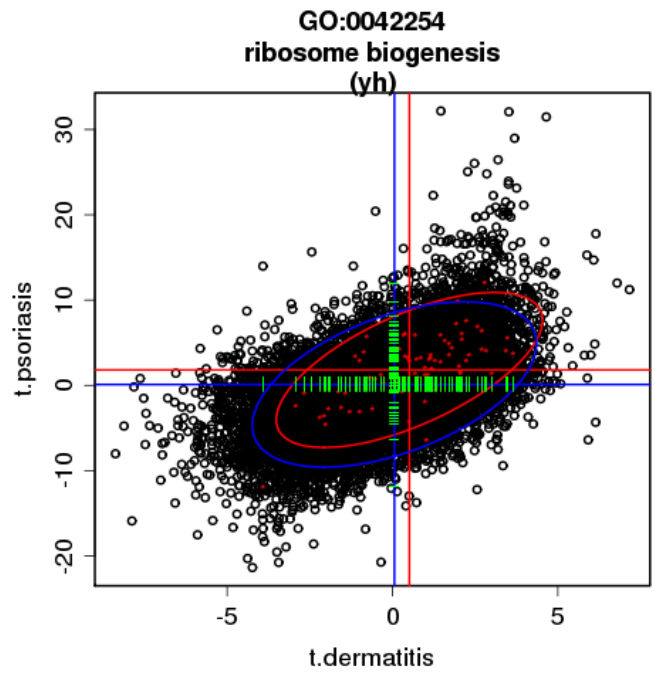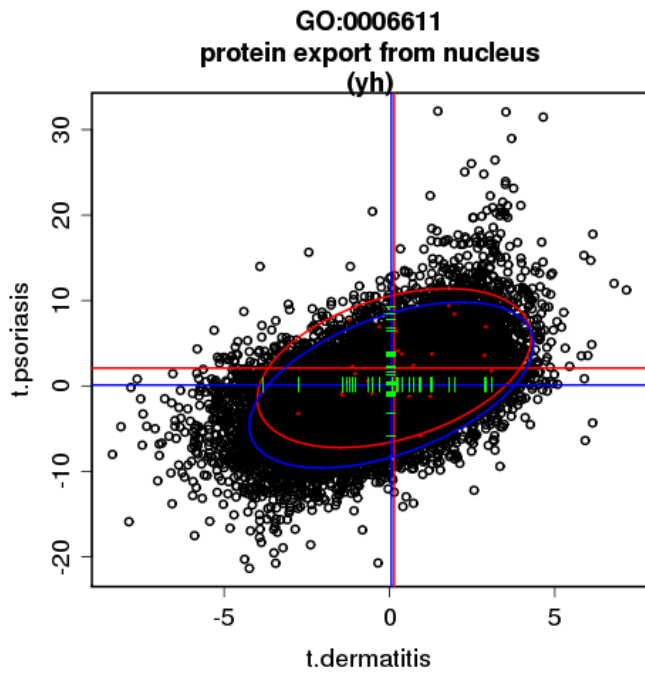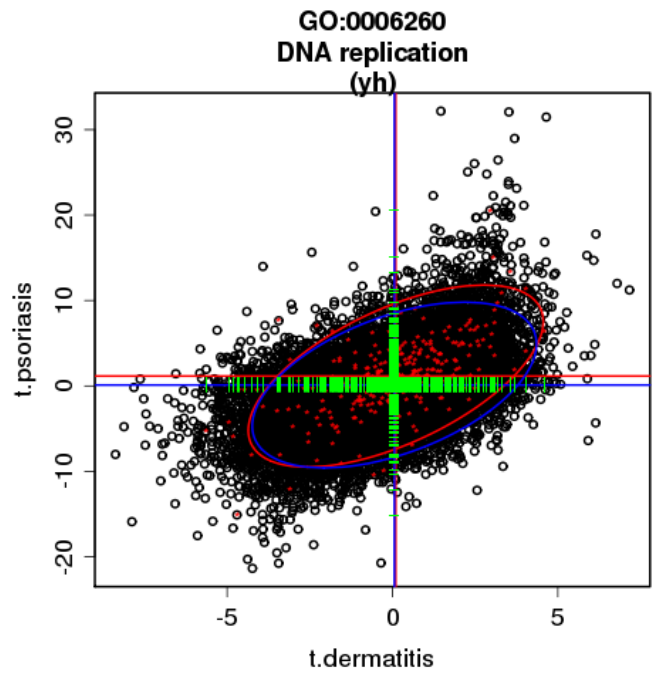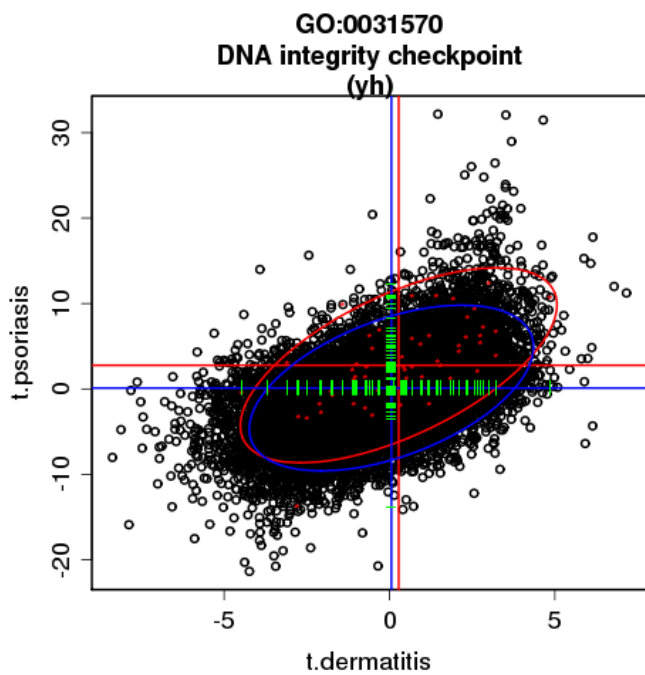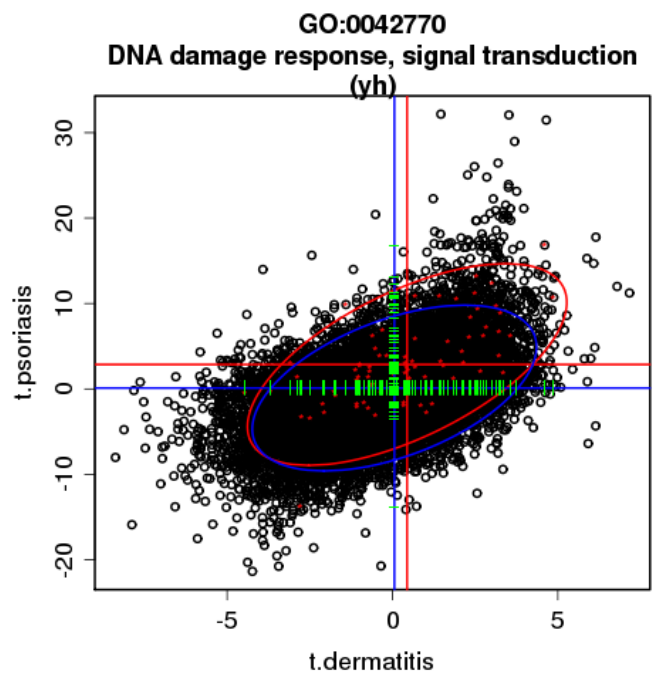

GO:0000077  
DNA damage checkpoint  
(yh)

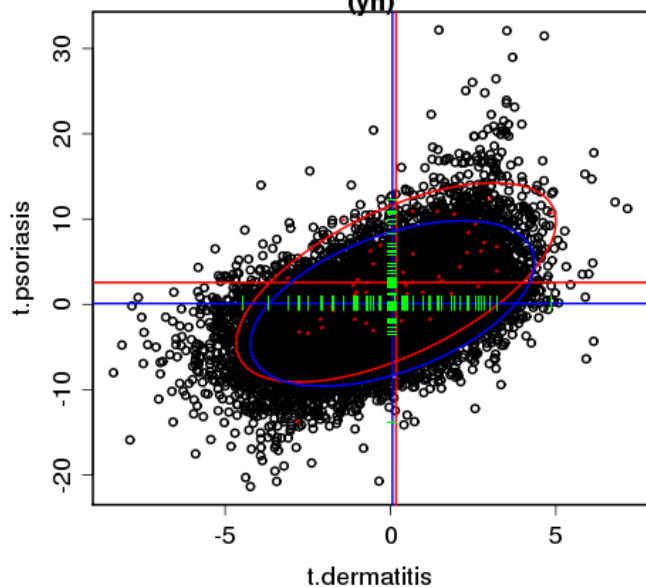

GO:0009314  
response to radiation  
(yh)

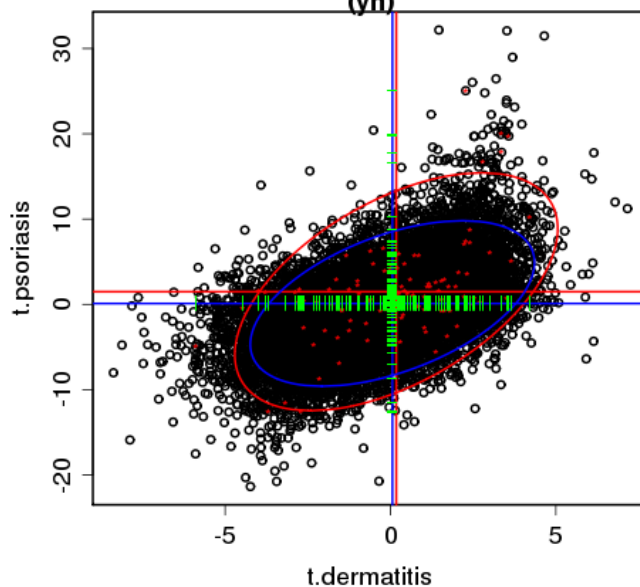

GO:0007126  
meiosis  
(yh)

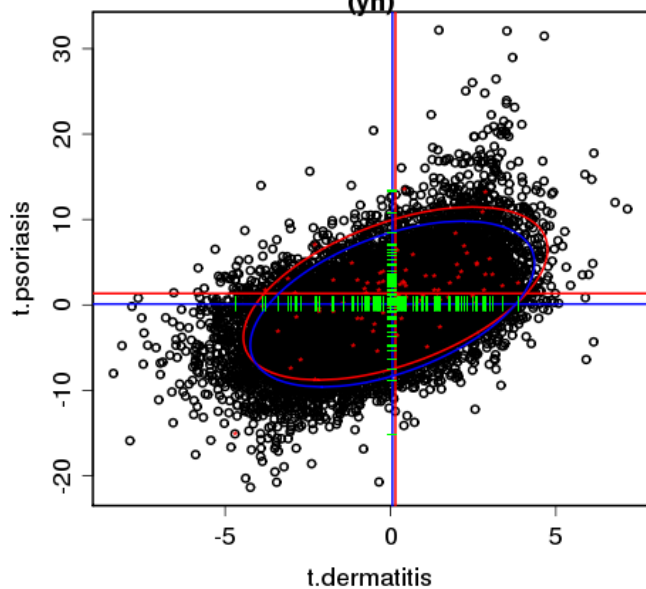

GO:0051321  
meiotic cell cycle  
(yh)

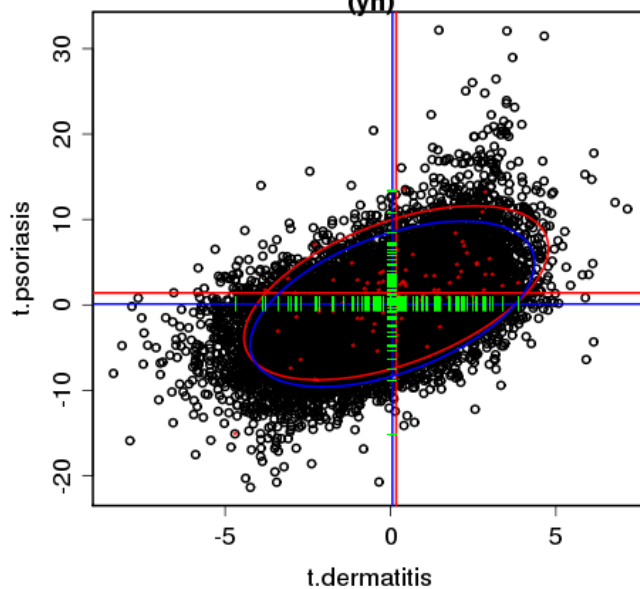

GO:0051327  
M phase of meiotic cell cycle  
(yh)



GO:0051262  
protein tetramerization  
(yh)

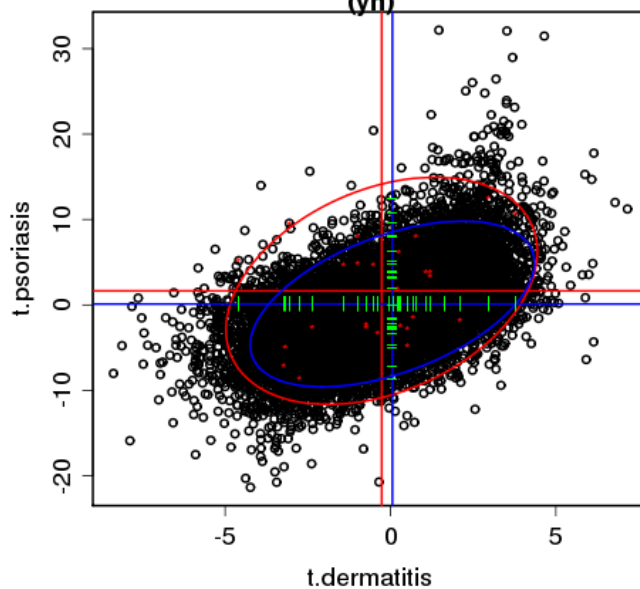

**GO:0006261**  
**DNA-dependent DNA replication**  
(yh)

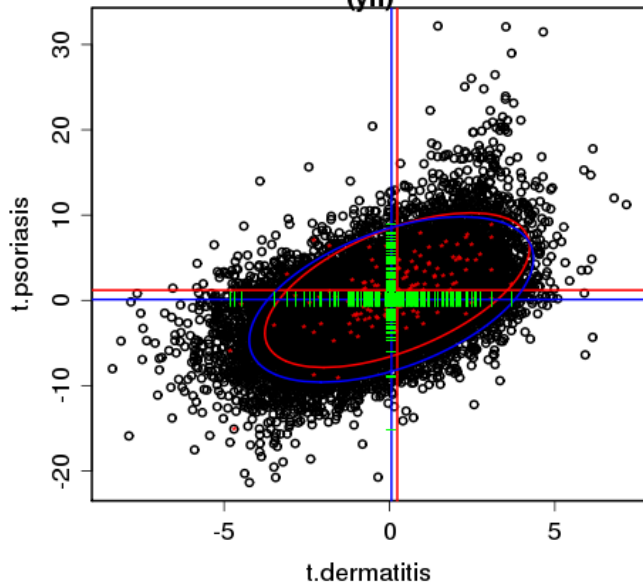

**GO:0046466**  
**membrane lipid catabolic process**  
(yh)

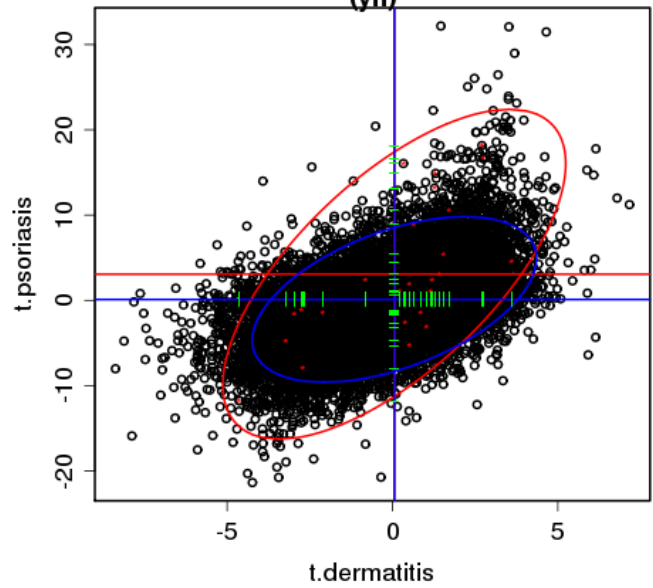

**GO:0007164**  
**establishment of tissue polarity**  
(yh)

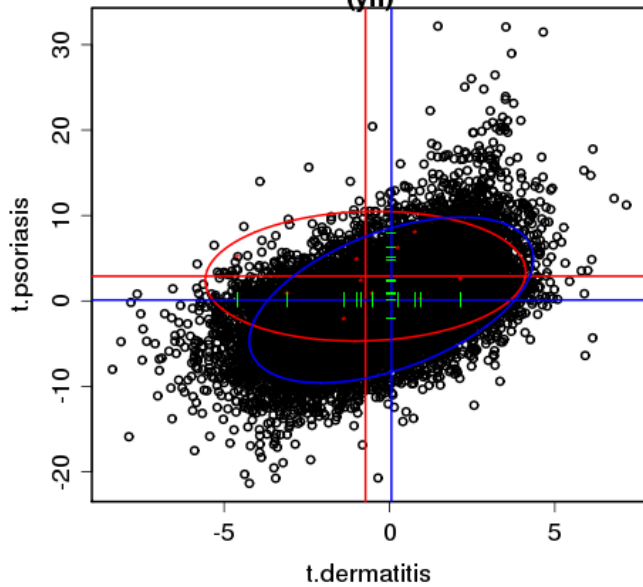

**GO:0000226**  
**microtubule cytoskeleton organization and biogenesis**  
(yh)

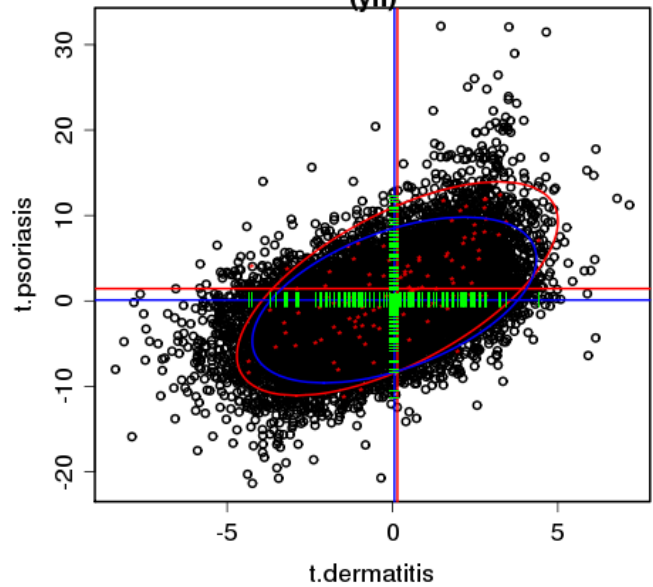

**GO:0007017**  
**microtubule-based process**  
(yh)

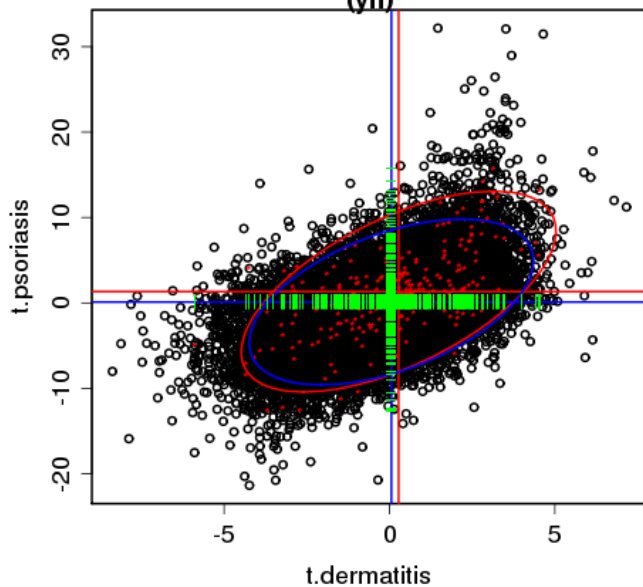

**GO:0032271**  
**regulation of protein polymerization**  
(yh)

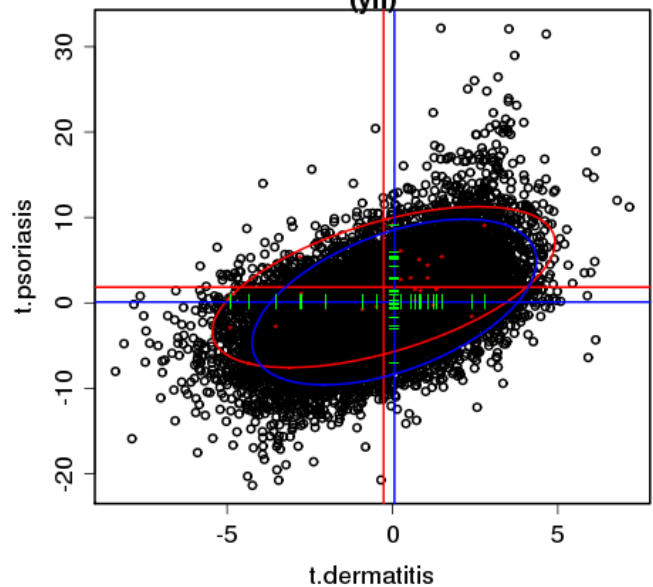



GO:0007346  
regulation of mitotic cell cycle  
(yh)

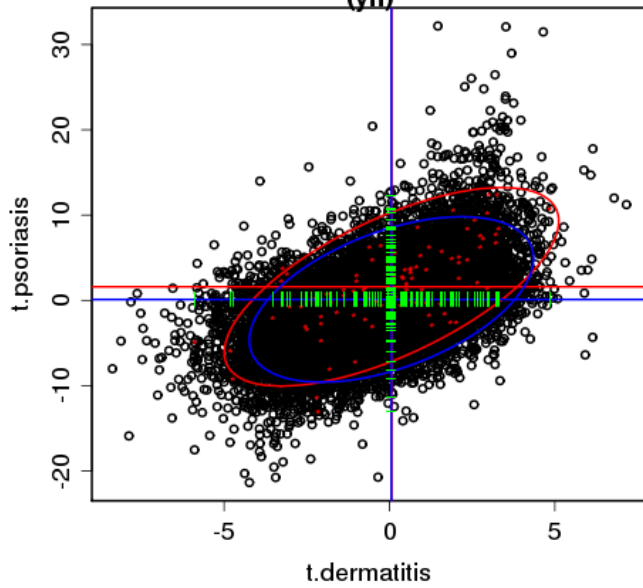

GO:0007067  
mitosis  
(yh)

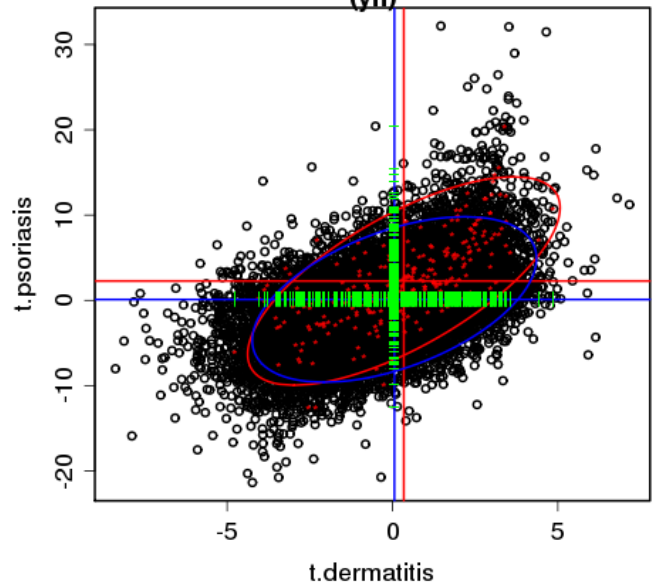

GO:0007088  
regulation of mitosis  
(yh)

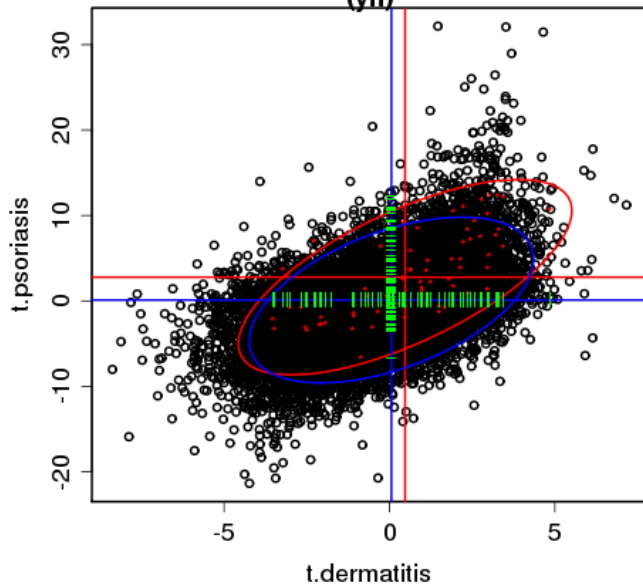

GO:0006767  
water-soluble vitamin metabolic process  
(yh)

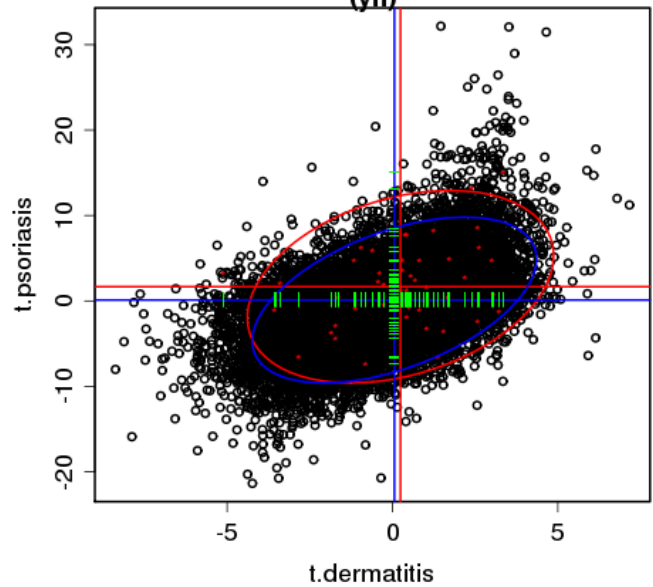

GO:0006769  
nicotinamide metabolic process  
(yh)

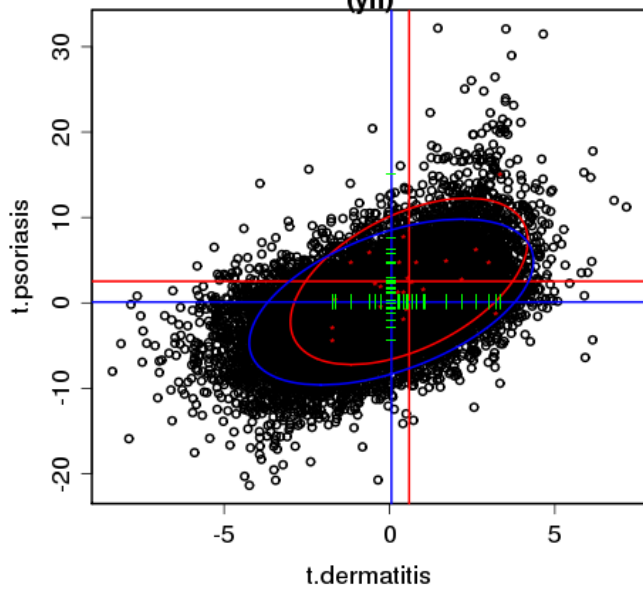

GO:0006691  
leukotriene metabolic process  
(yh)

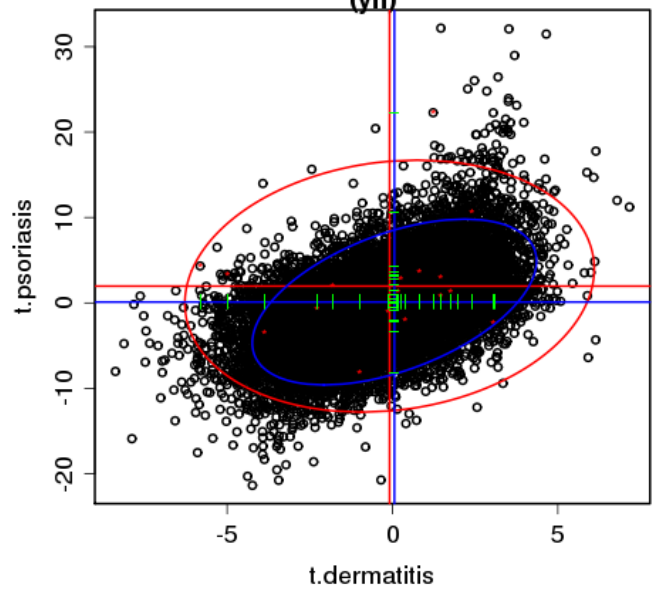

GO:0043449  
alkene metabolic process  
(yh)

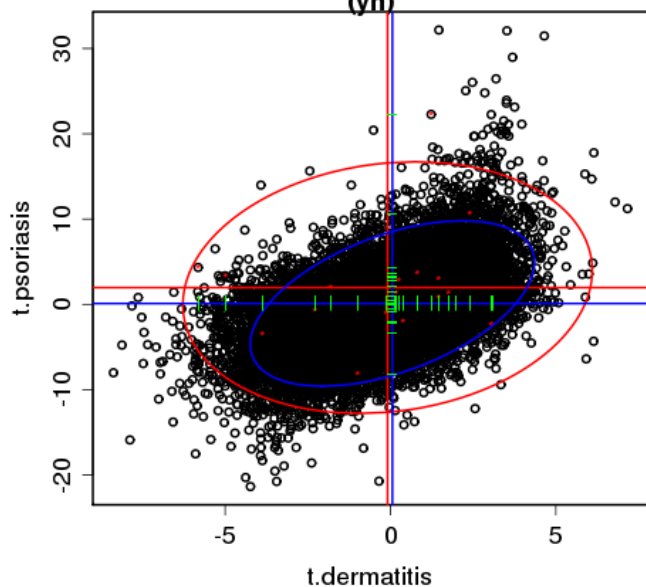

GO:0043450  
alkene biosynthetic process  
(yh)

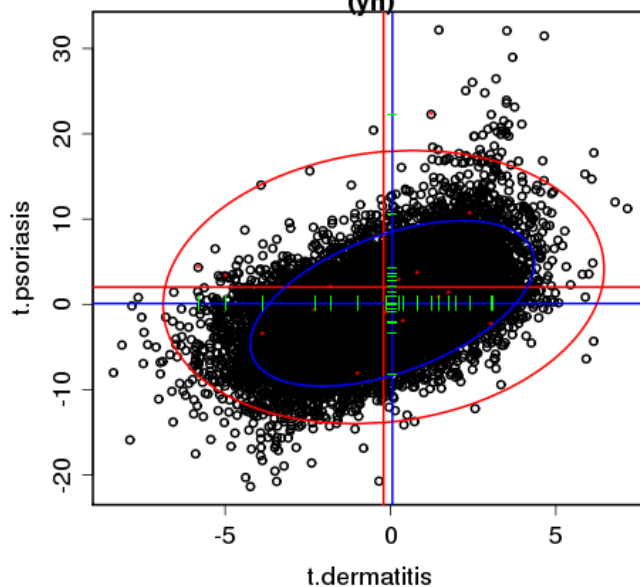

GO:0019370  
leukotriene biosynthetic process  
(yh)

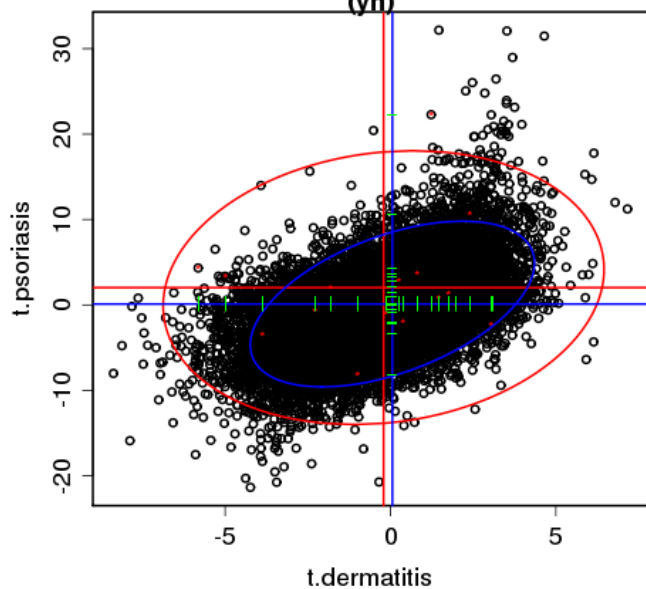

GO:0046034  
ATP metabolic process  
(yh)

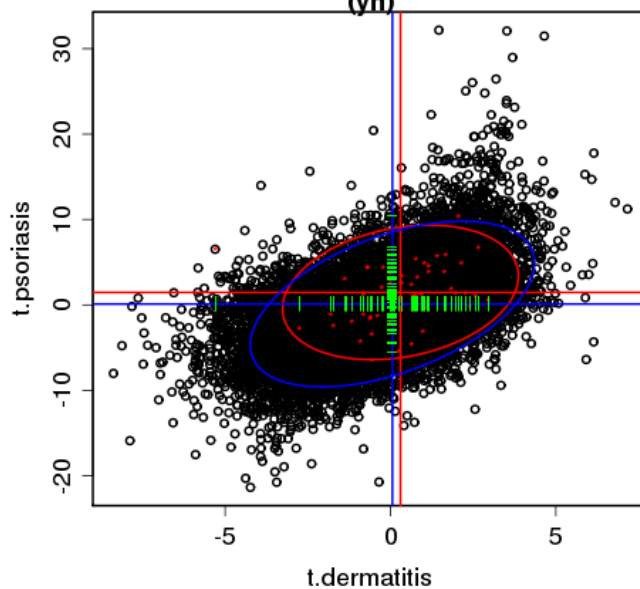

GO:0044265  
cellular macromolecule catabolic process  
(yh)

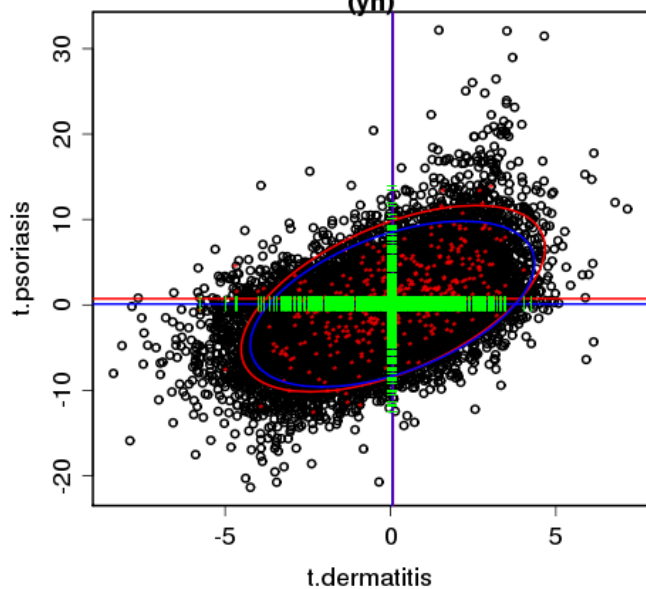

GO:0045840  
positive regulation of mitosis  
(yh)

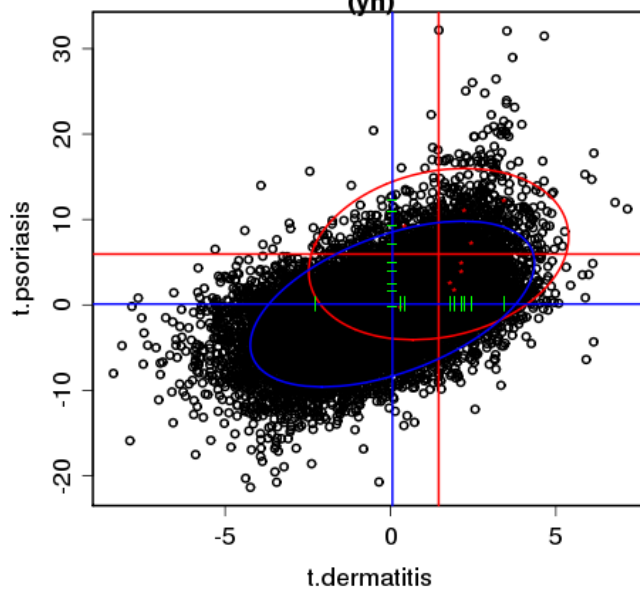

GO:0001906

cell killing

(yh)

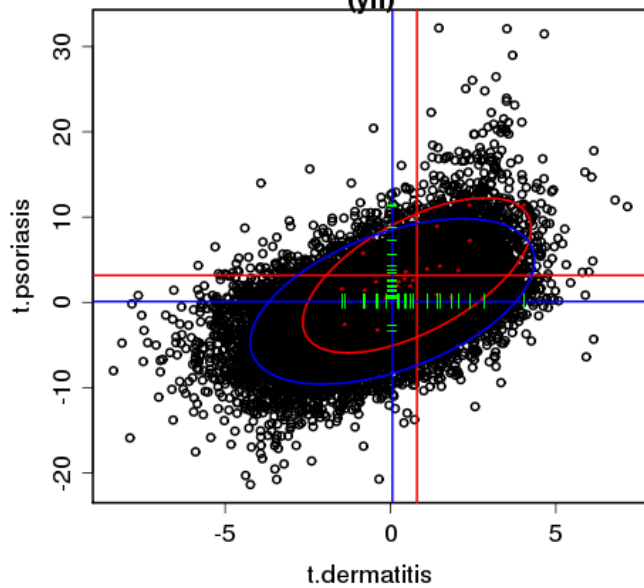

GO:0001909

leukocyte mediated cytotoxicity

(yh)

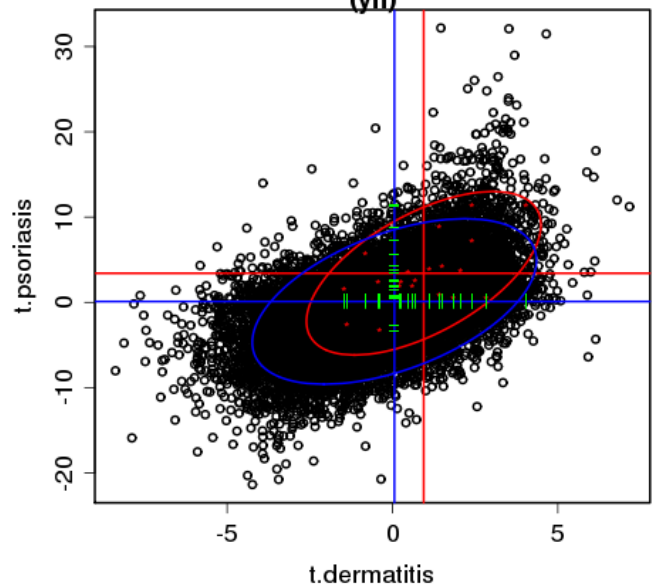

GO:0002228

natural killer cell mediated immunity

(yh)

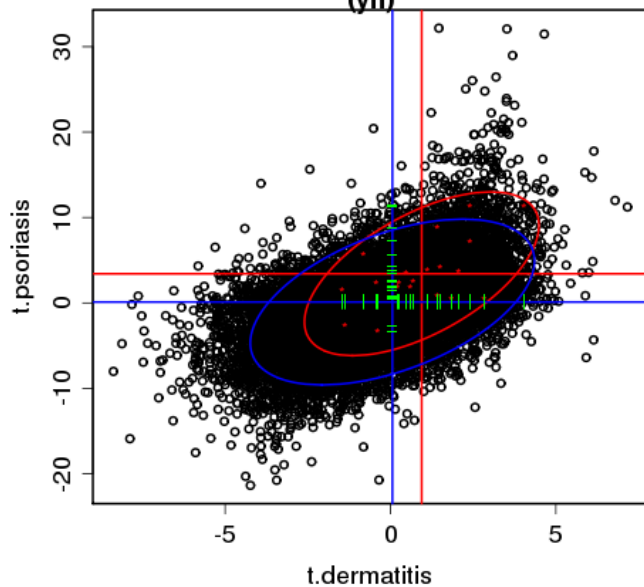

GO:0042267

natural killer cell mediated cytotoxicity

(yh)

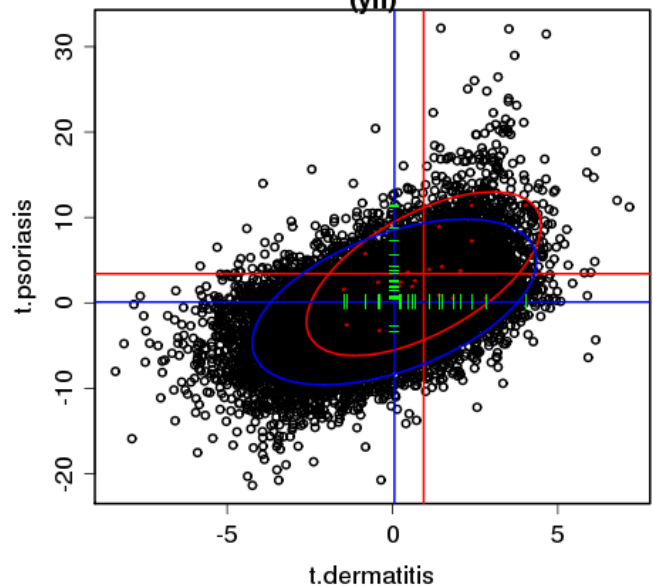

GO:0006984

ER-nuclear signaling pathway

(yh)

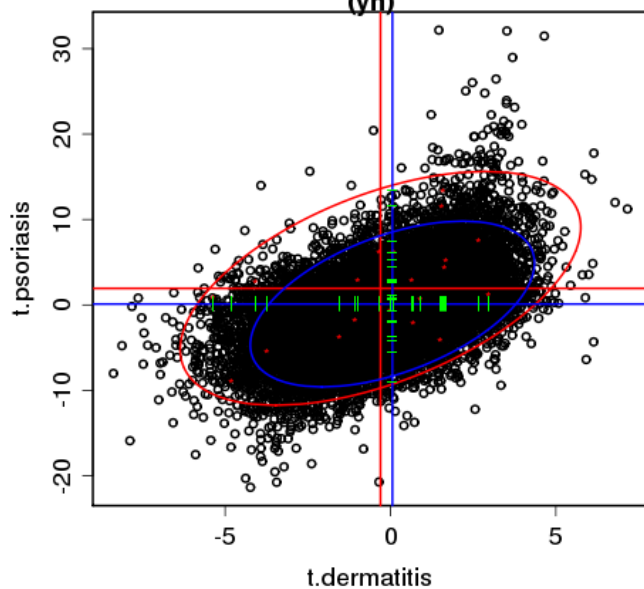

GO:0045639

positive regulation of myeloid cell differentiation

(yh)

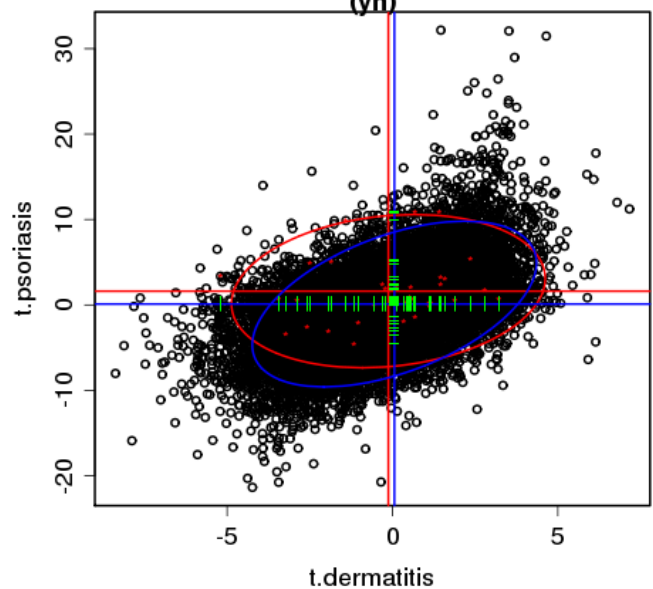

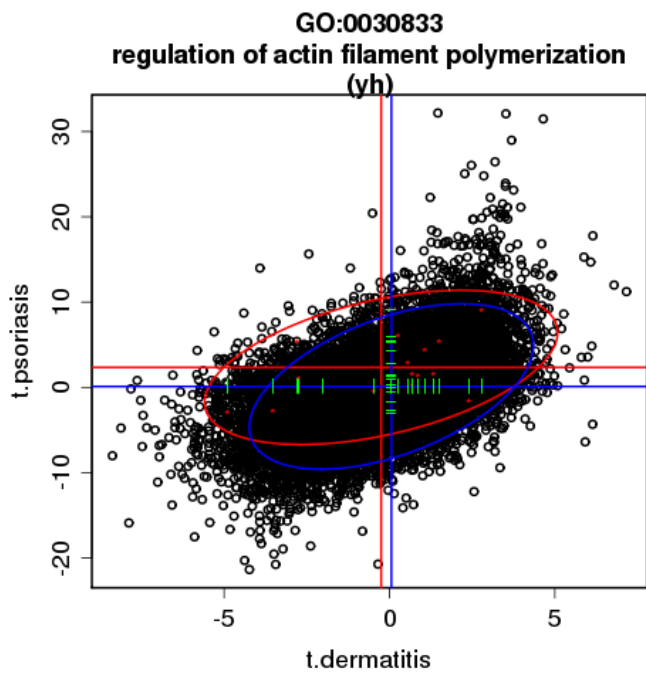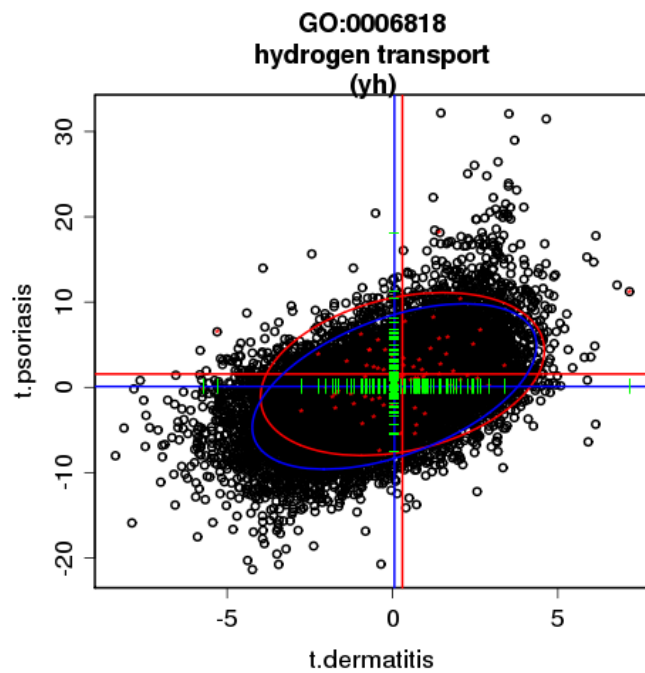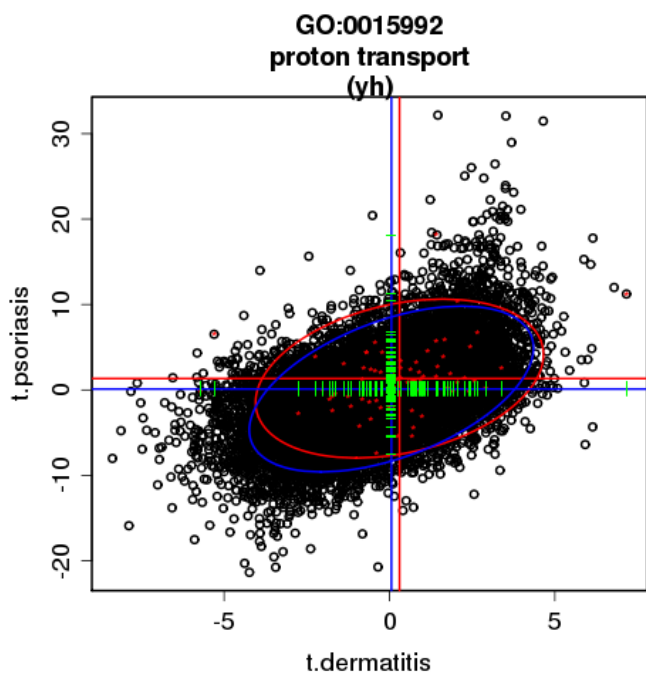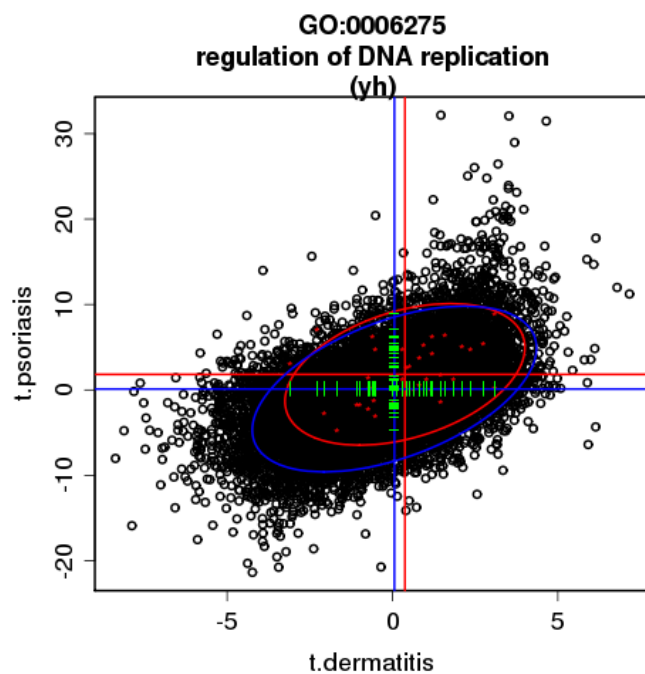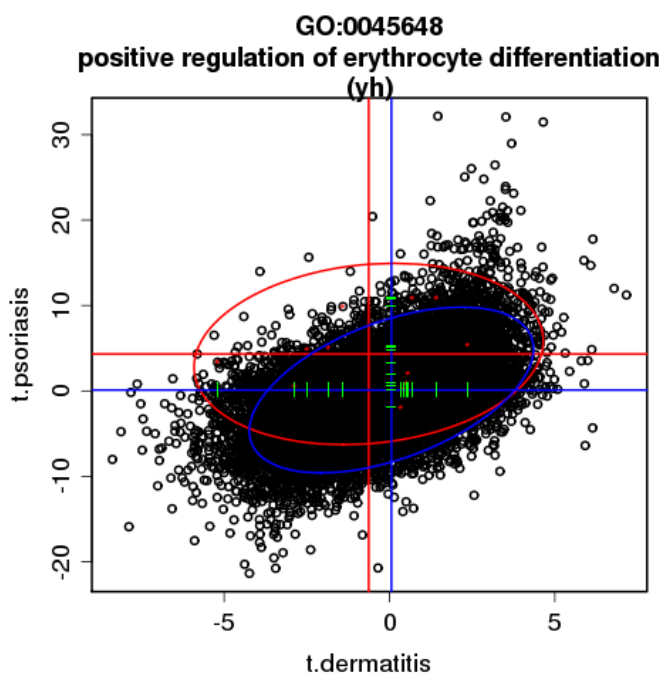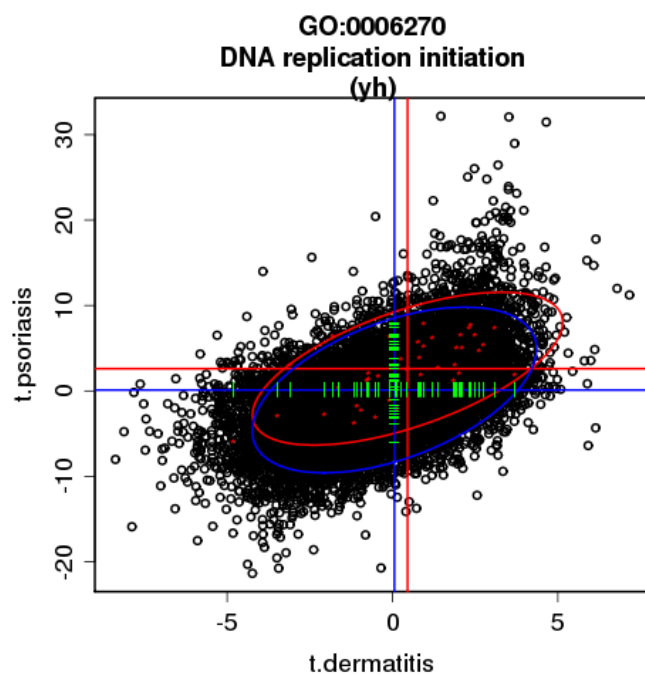

**GO:0002456**  
**T cell mediated immunity**  
**(yh)**

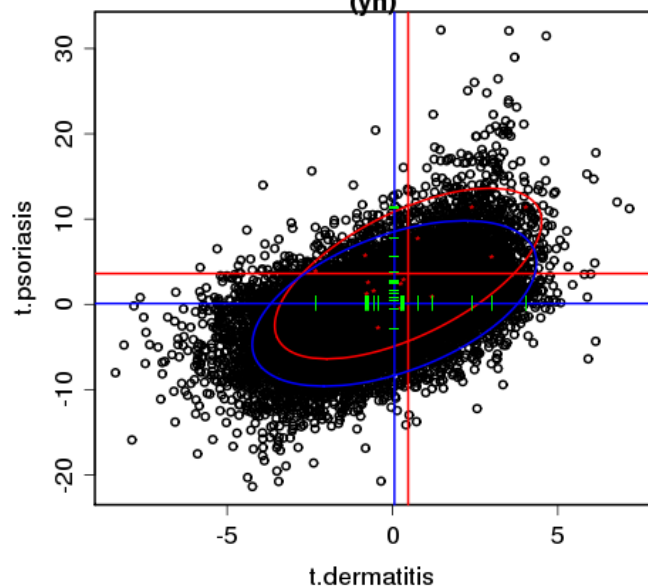

**GO:0051648**  
**vesicle localization**  
**(yh)**

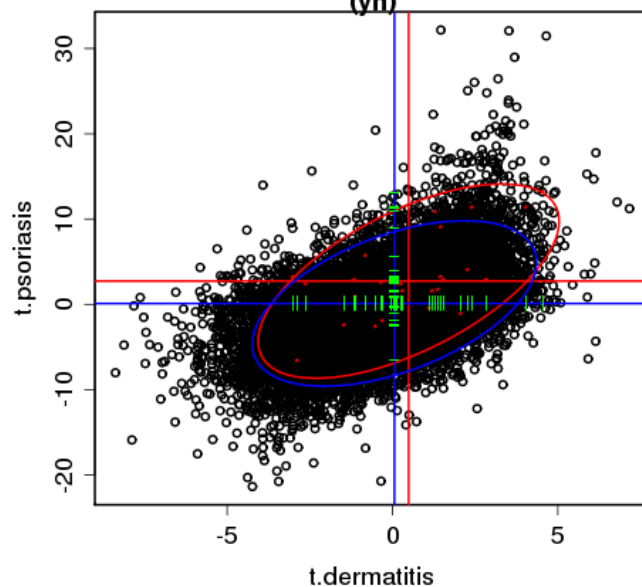

**GO:0051650**  
**establishment of vesicle localization**  
**(yh)**

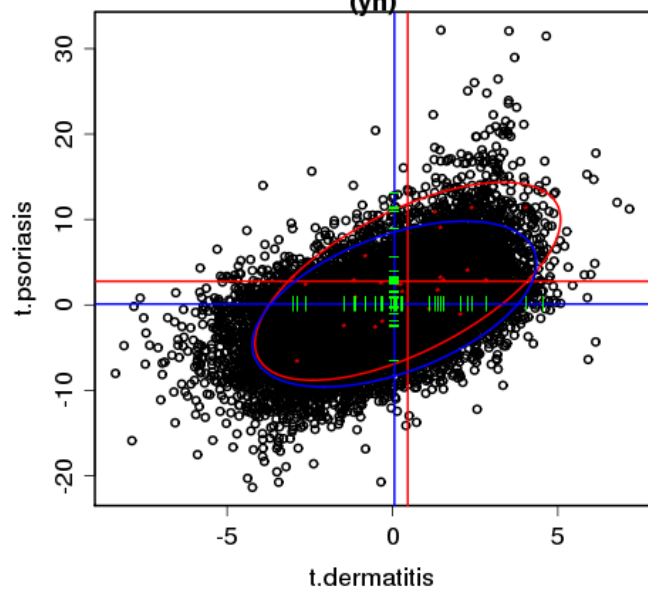

**GO:0048730**  
**epidermis morphogenesis**  
**(yh)**

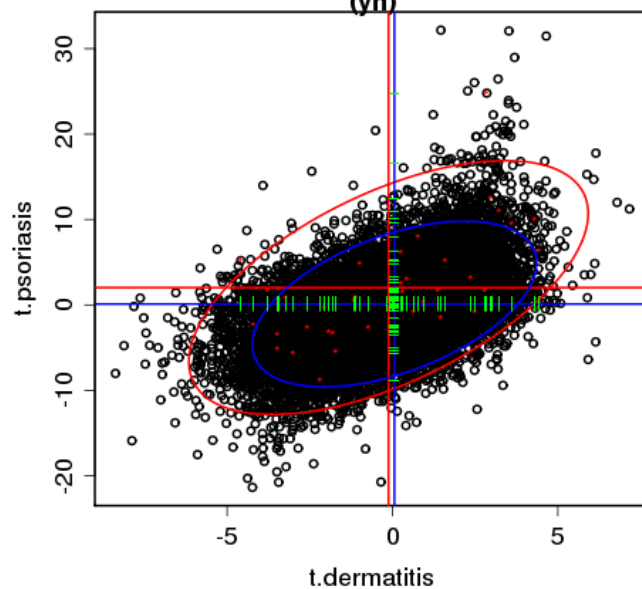

**GO:0009411**  
**response to UV**  
**(yh)**

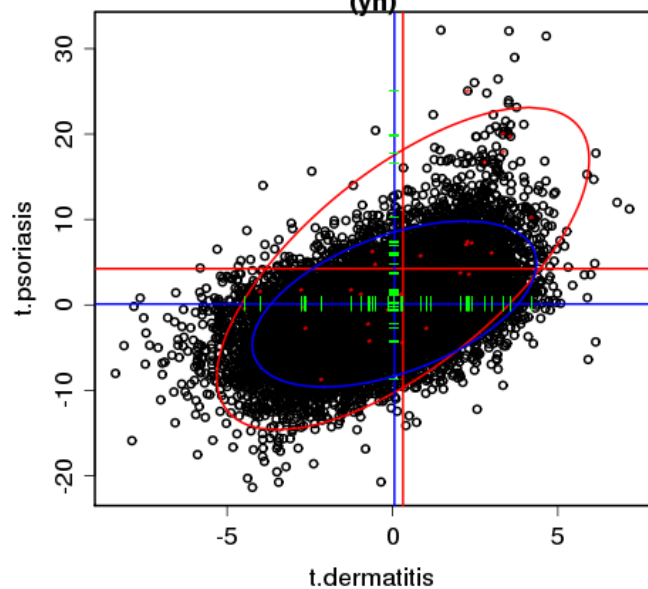

**GO:0048284**  
**organelle fusion**  
**(yh)**

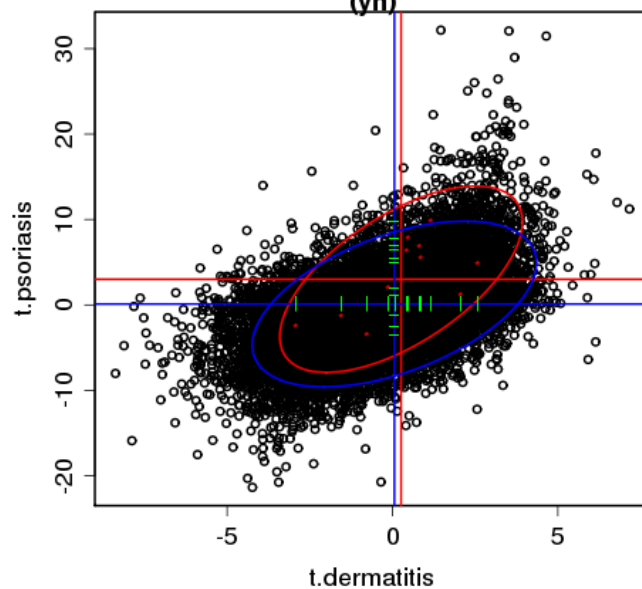

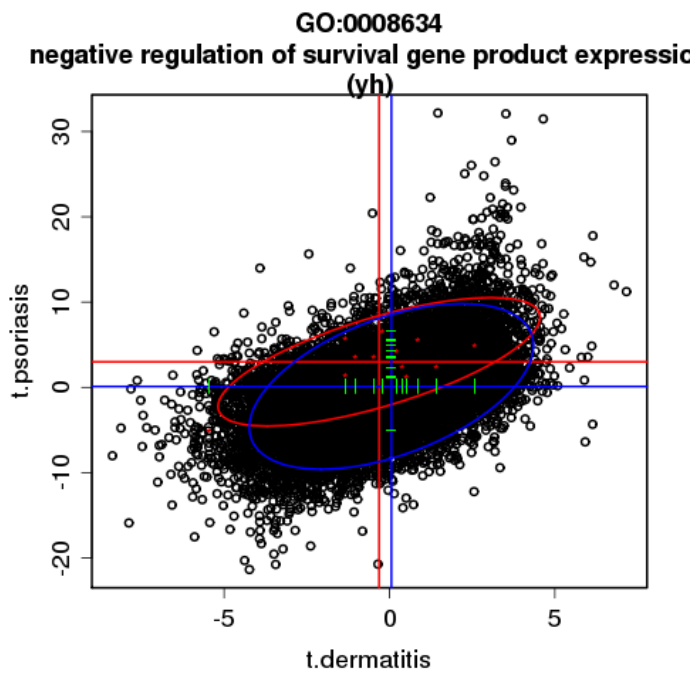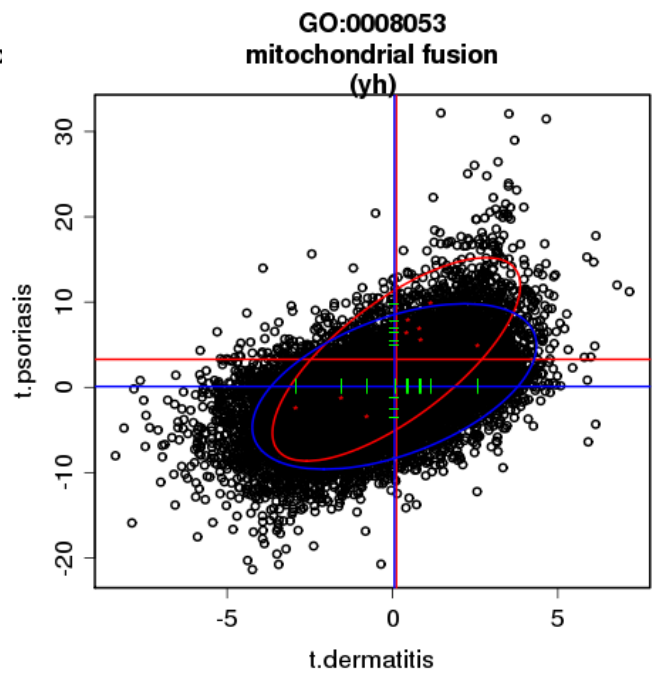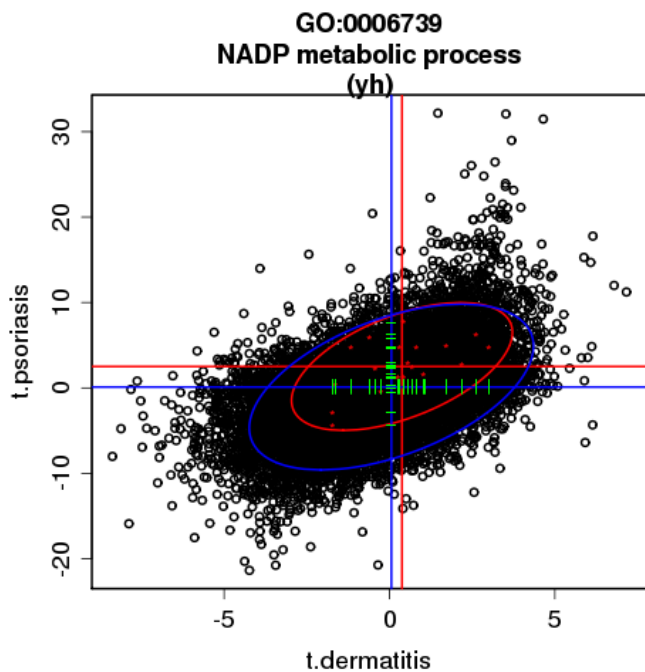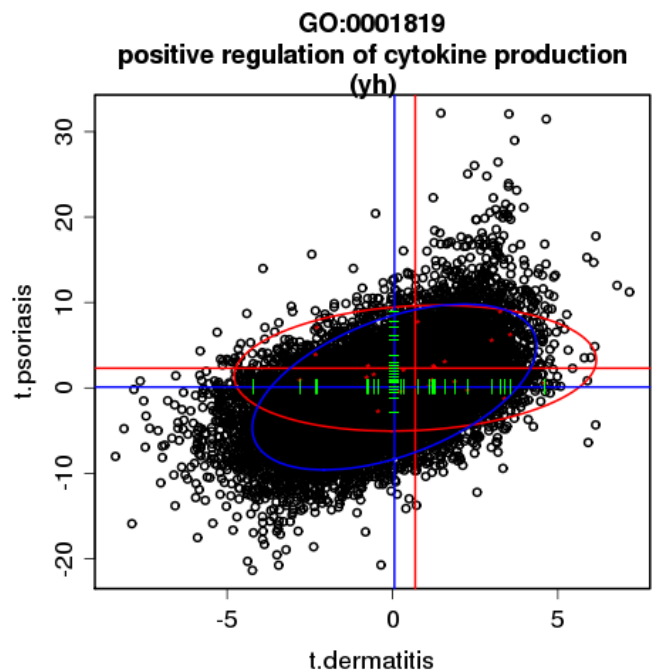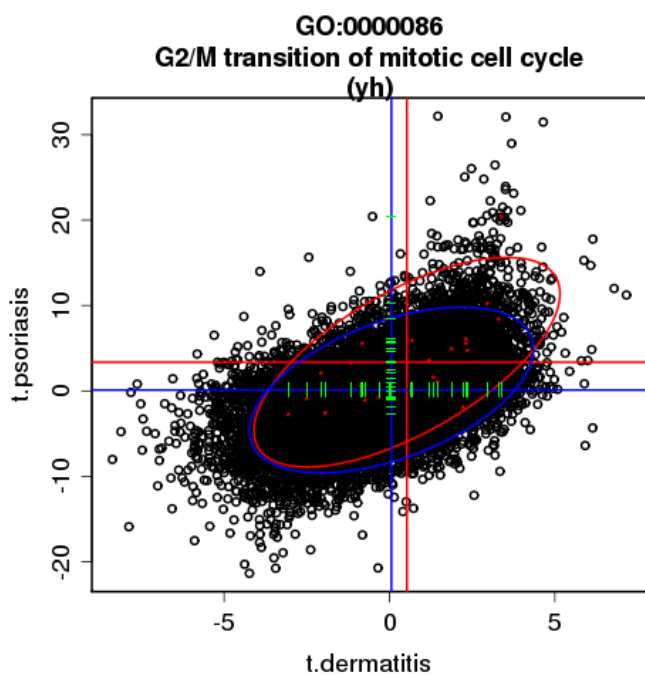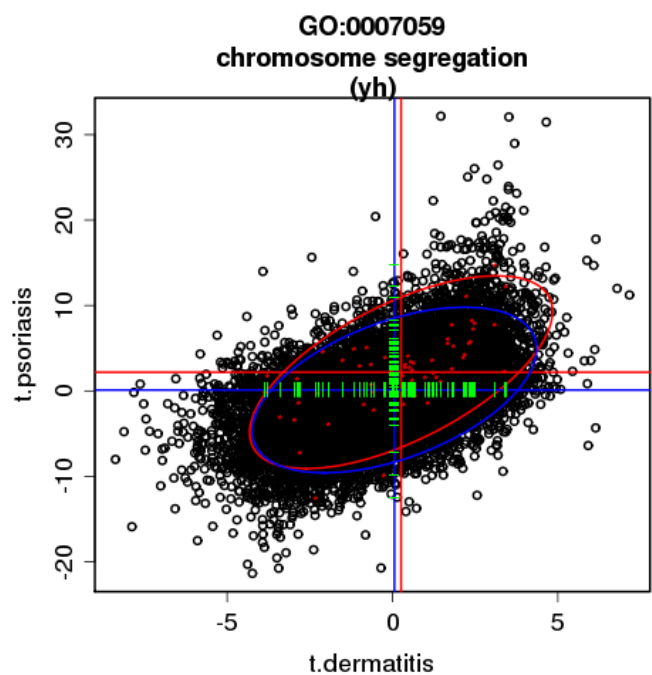



GO:0031069  
hair follicle morphogenesis  
(yh)

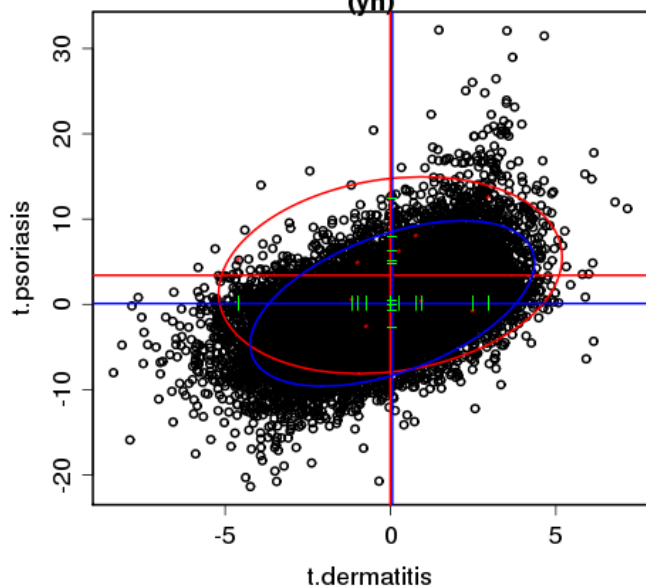

GO:0006302  
double-strand break repair  
(yh)

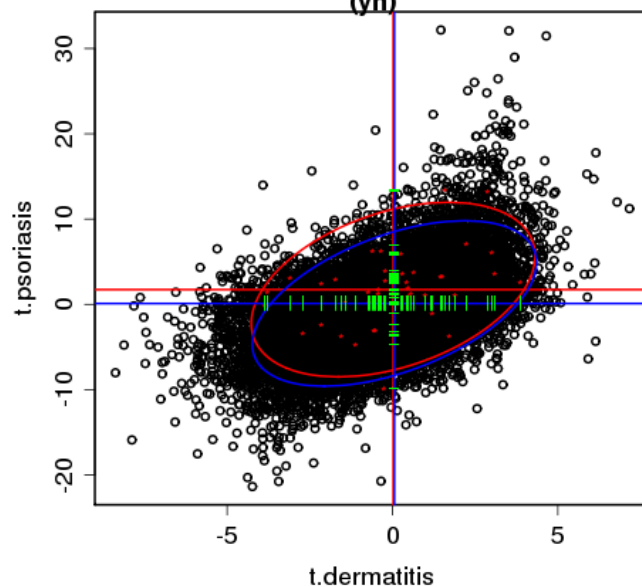

GO:0007032  
endosome organization and biogenesis  
(yh)

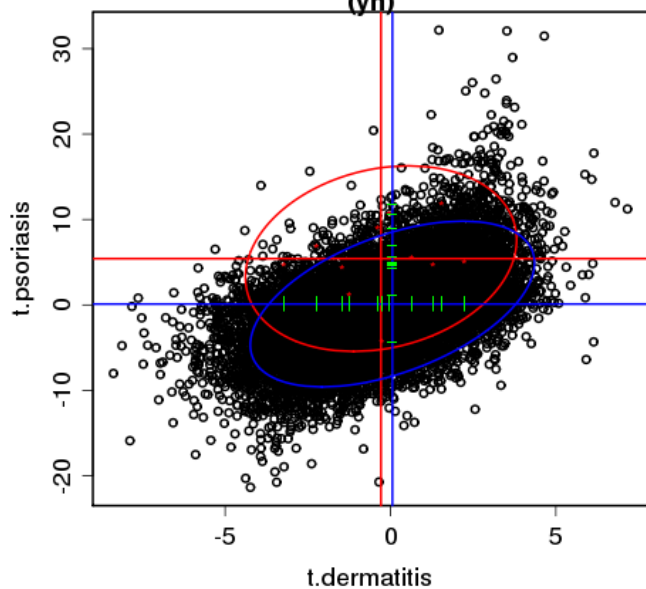

GO:0007051  
spindle organization and biogenesis  
(yh)

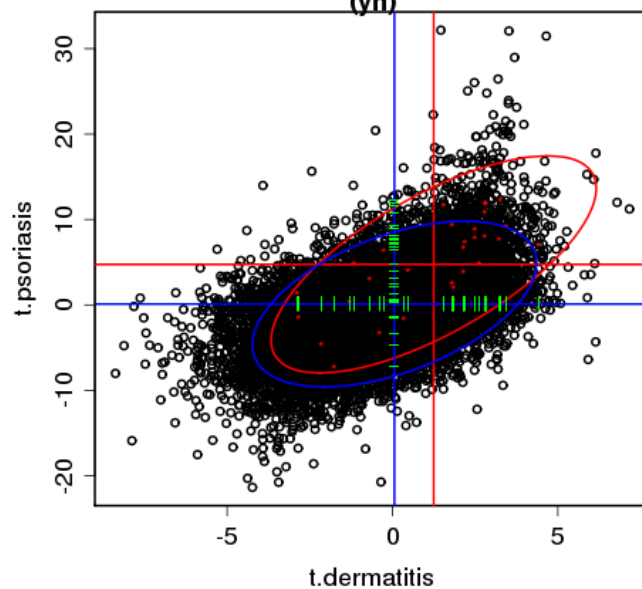

GO:0032635  
interleukin-6 production  
(yh)

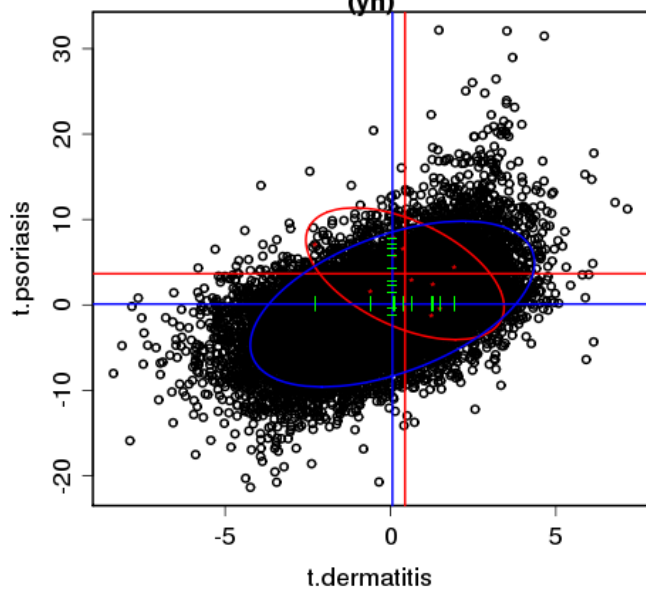

GO:0042226  
interleukin-6 biosynthetic process  
(yh)

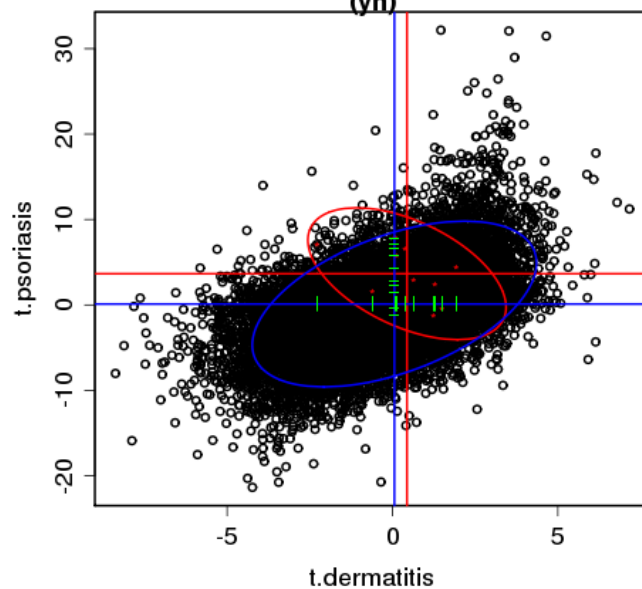

GO:0008593  
regulation of Notch signaling pathway  
(yh)

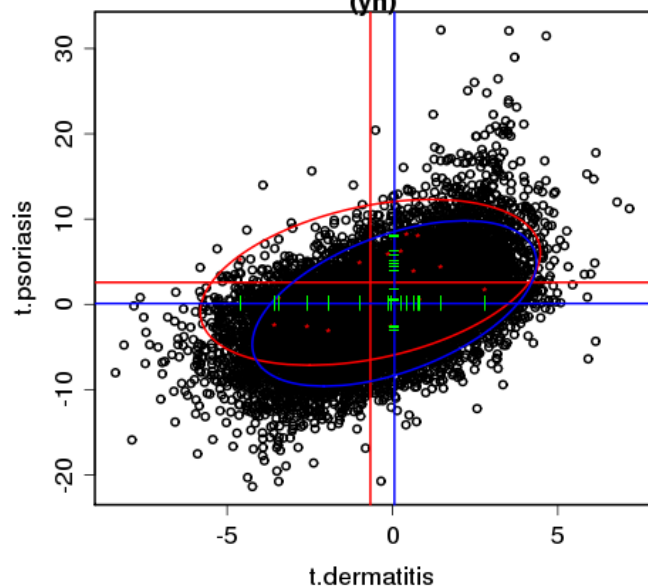

GO:0030330  
A damage response, signal transduction by p53 class m  
(yh)

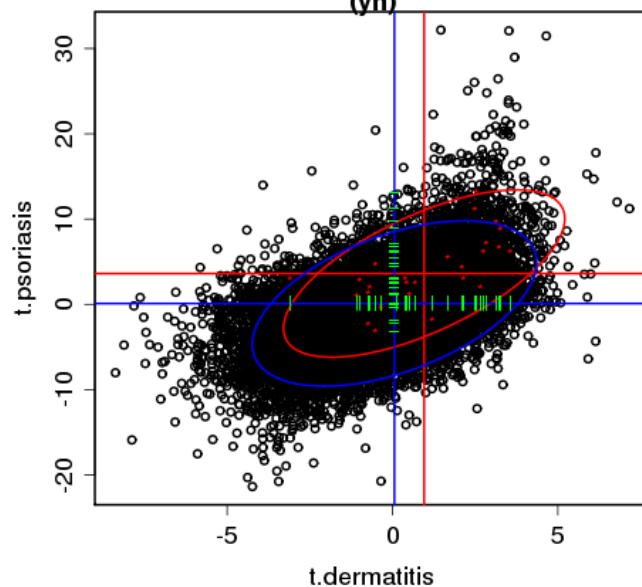

GO:0030968  
endoplasmic reticulum unfolded protein response  
(yh)

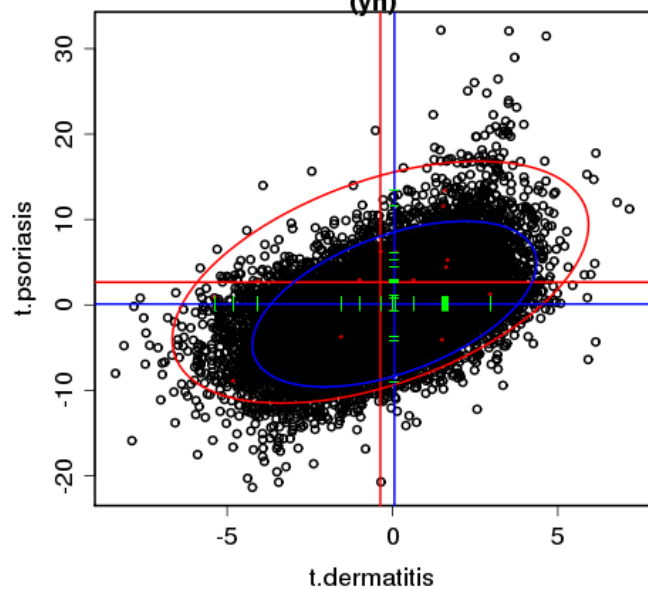

GO:0046479  
glycosphingolipid catabolic process  
(yh)

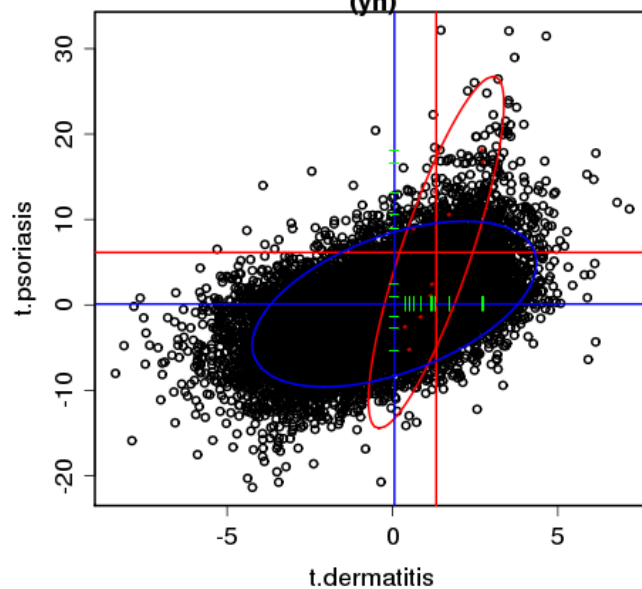

GO:0006829  
zinc ion transport  
(yh)

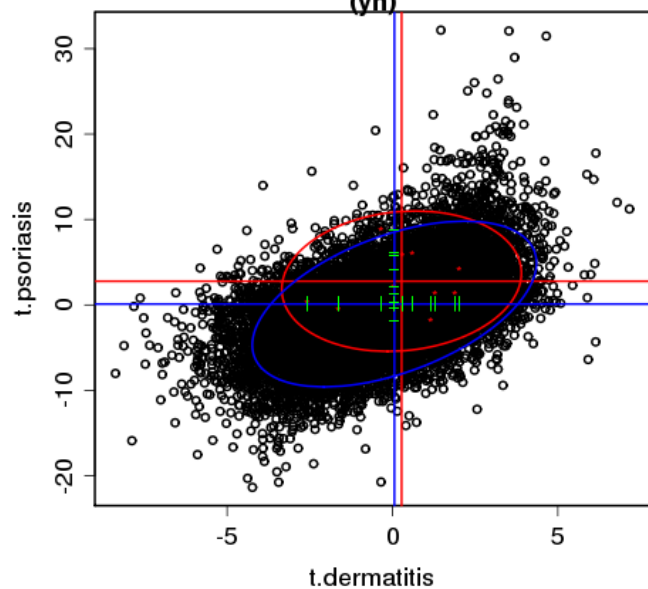

GO:0007020  
microtubule nucleation  
(yh)

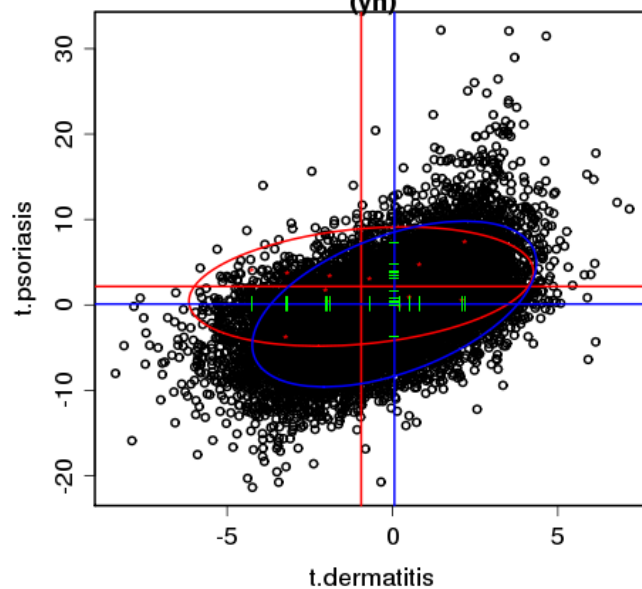

GO:0001501  
skeletal development  
(yl)

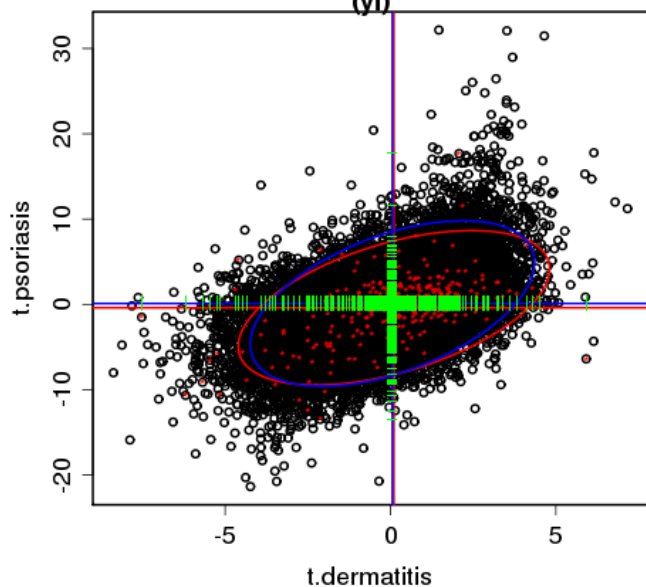

GO:0003012  
muscle system process  
(yl)

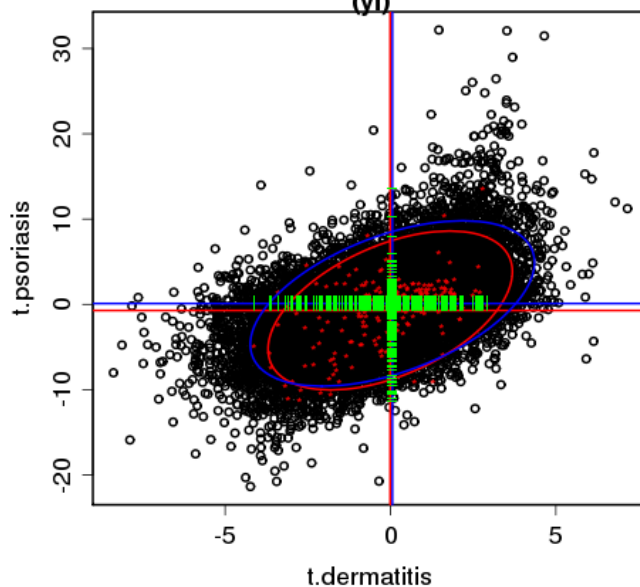

GO:0006936  
muscle contraction  
(yl)

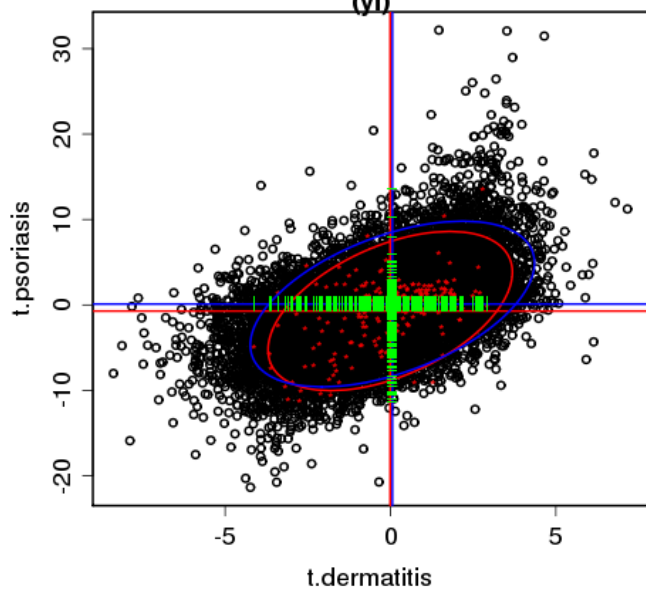

GO:0019226  
transmission of nerve impulse  
(yl)

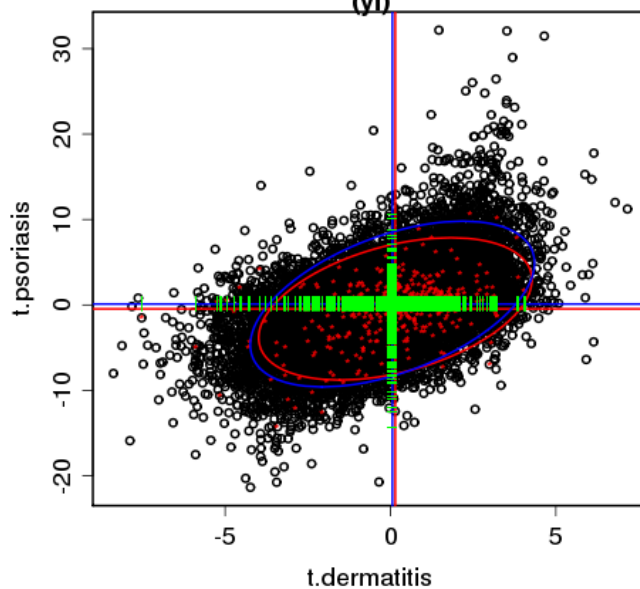

GO:0006939  
smooth muscle contraction  
(yl)

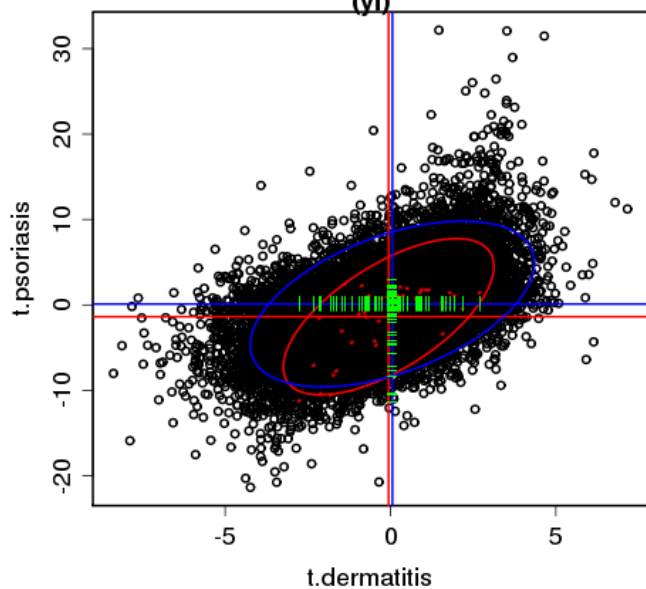

GO:0007417  
central nervous system development  
(yl)

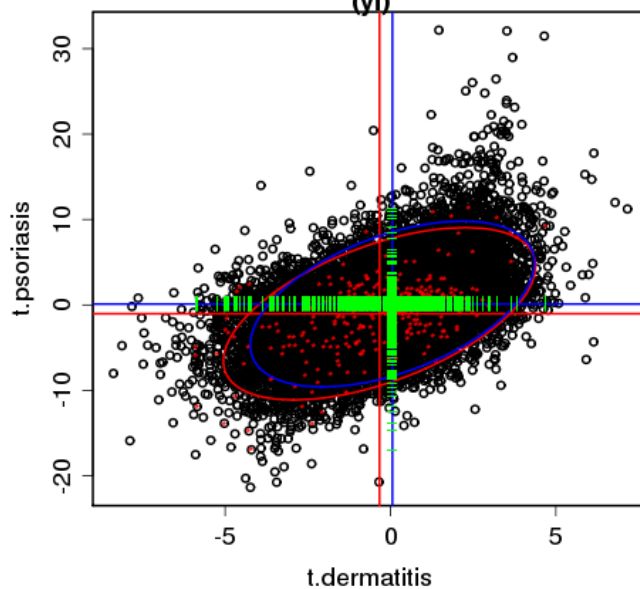

**GO:0022008**  
**neurogenesis**  
(yl)

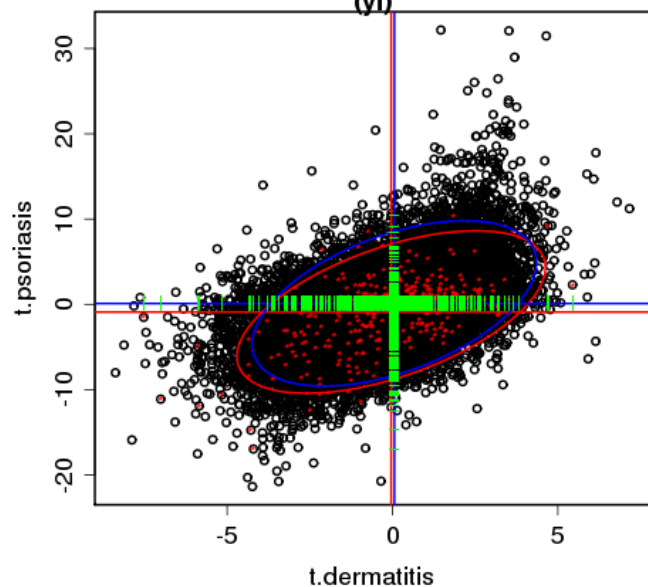

**GO:0048699**  
**generation of neurons**  
(yl)

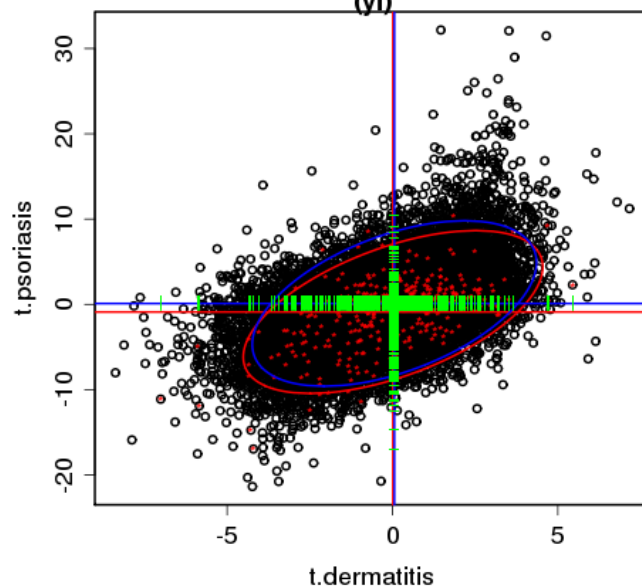

**GO:0007420**  
**brain development**  
(yl)

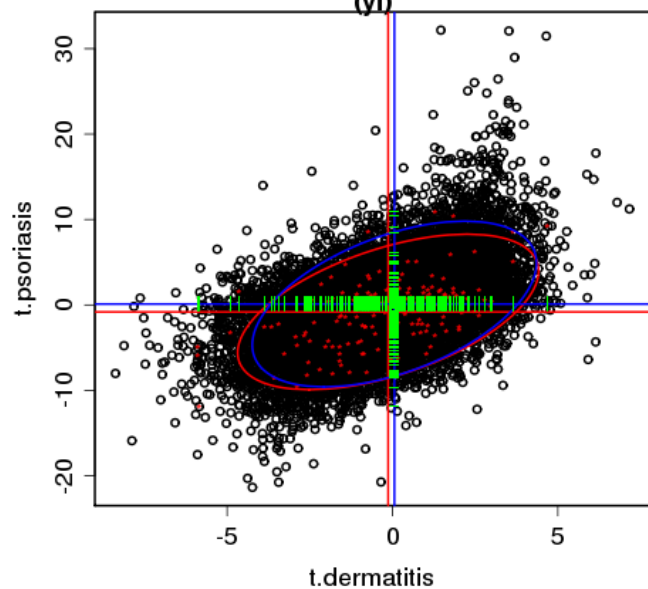

**GO:0030900**  
**forebrain development**  
(yl)

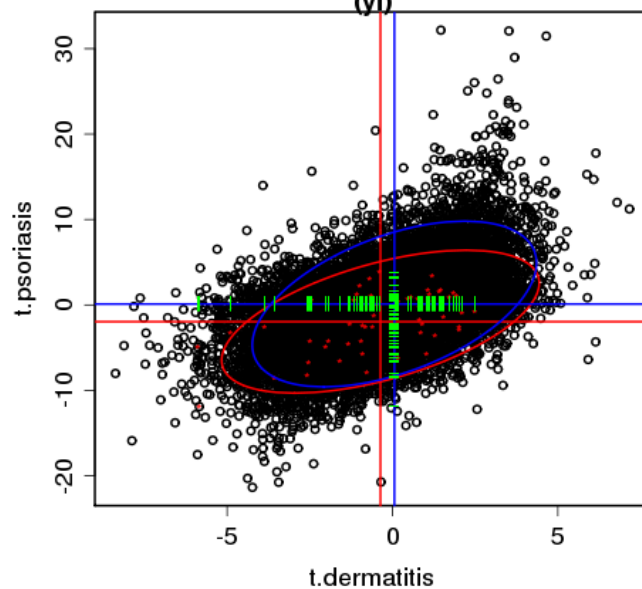

**GO:0008285**  
**negative regulation of cell proliferation**  
(yl)

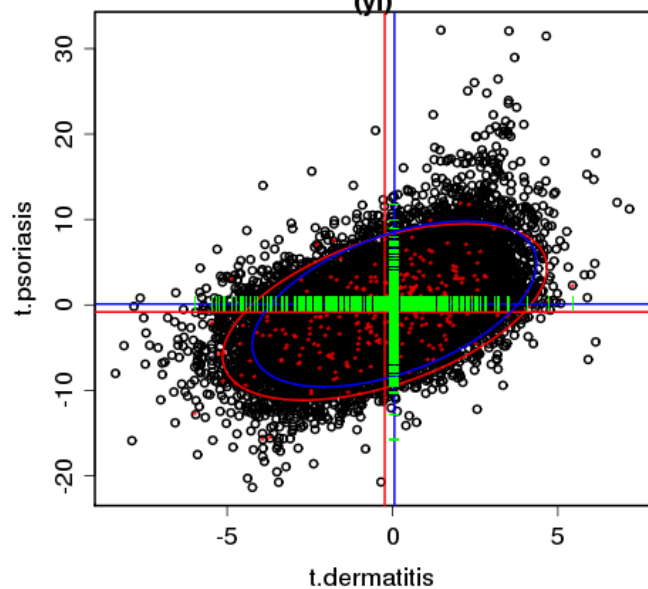

**GO:0021700**  
**developmental maturation**  
(yl)

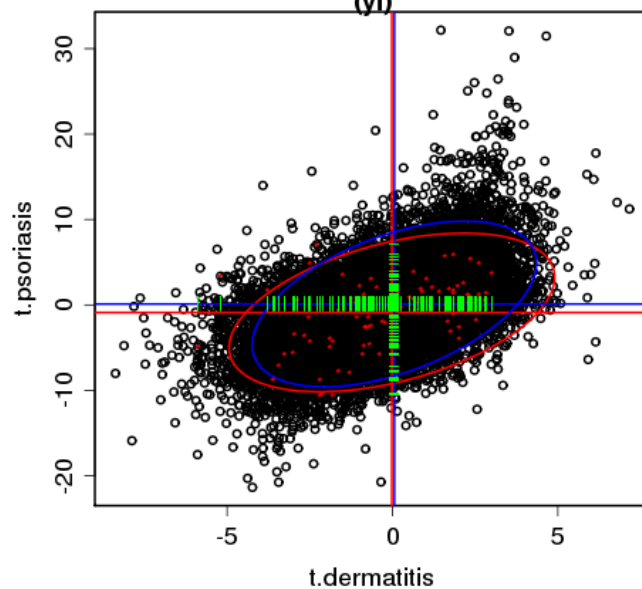

GO:0032990  
cell part morphogenesis  
(yl)

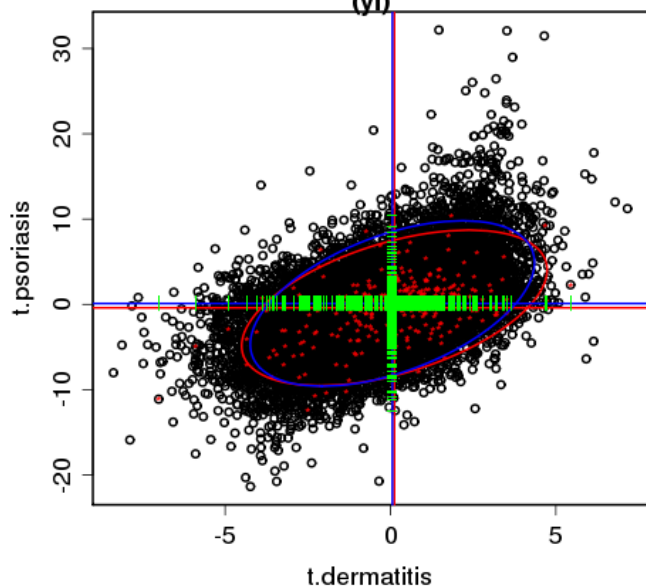

GO:0030030  
cell projection organization and biogenesis  
(yl)

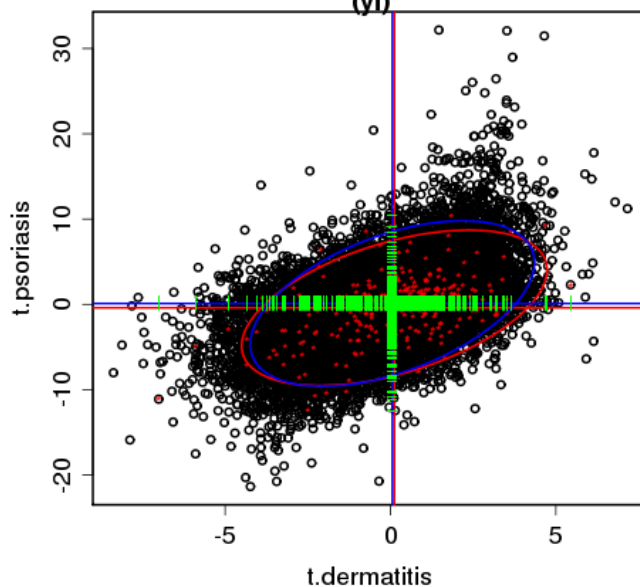

GO:0031175  
neurite development  
(yl)

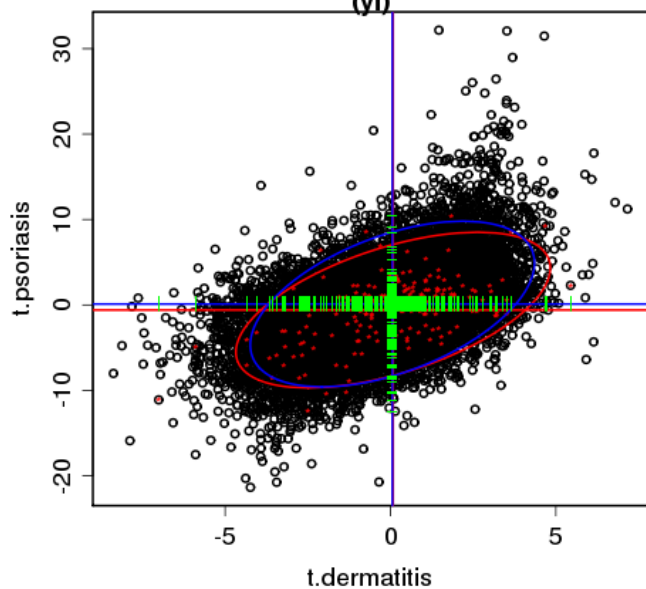

GO:0048666  
neuron development  
(yl)

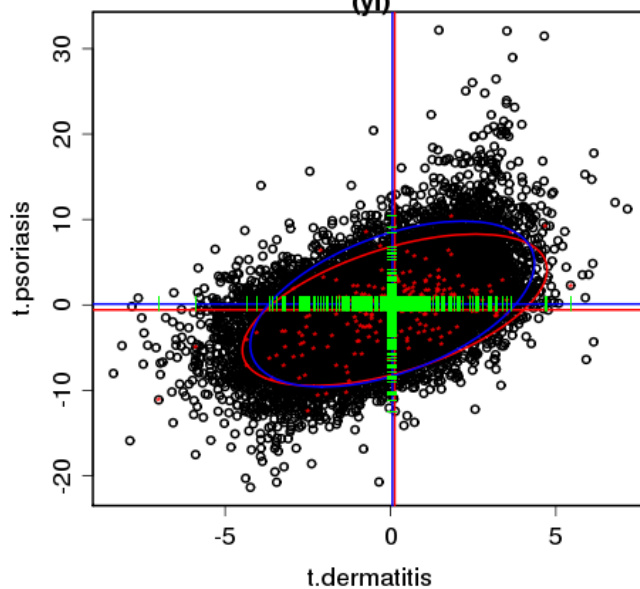

GO:0048858  
cell projection morphogenesis  
(yl)

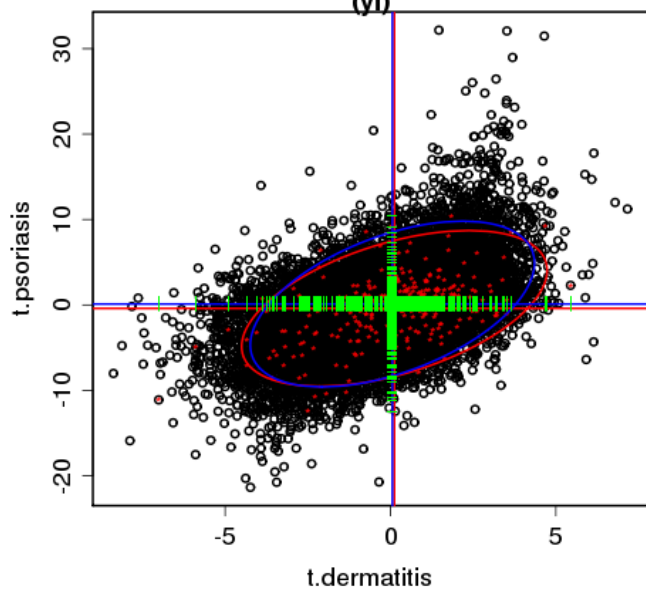

GO:0007517  
muscle development  
(yl)

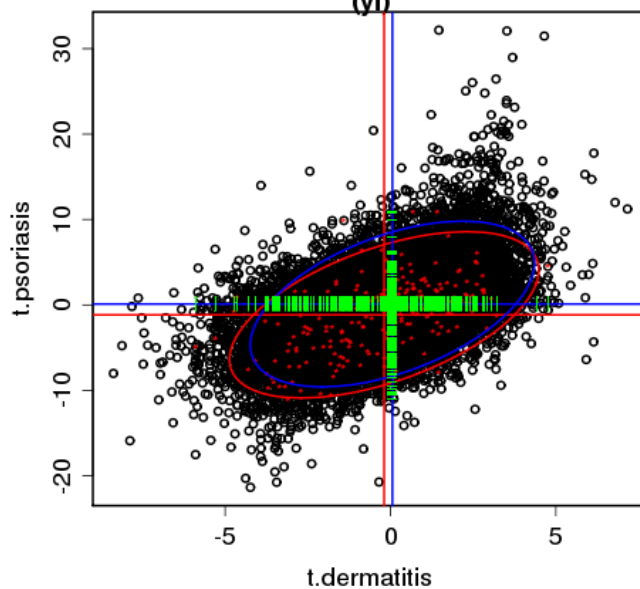

**GO:0014706**  
**striated muscle development**  
(yl)

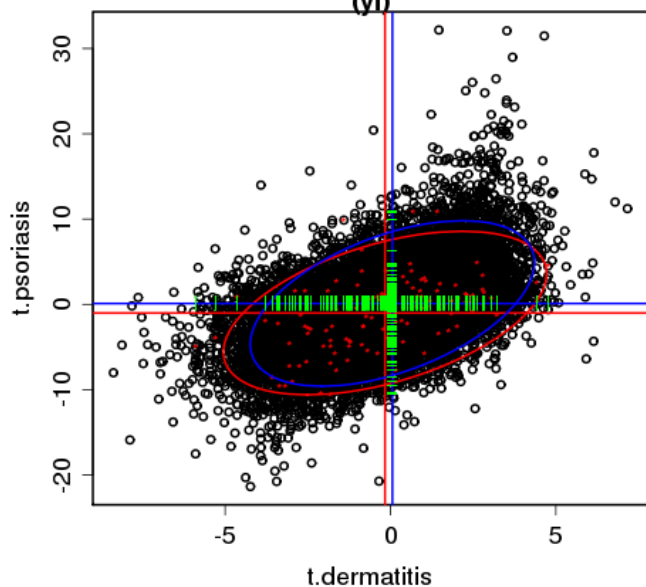

**GO:0008361**  
**regulation of cell size**  
(yl)

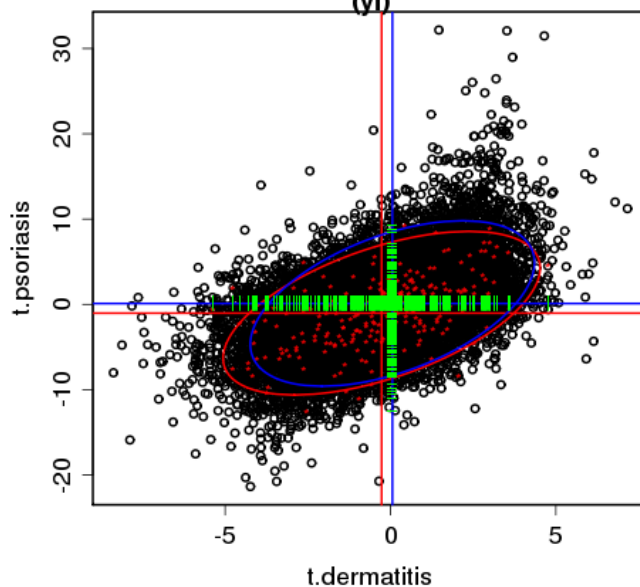

**GO:0040007**  
**growth**  
(yl)

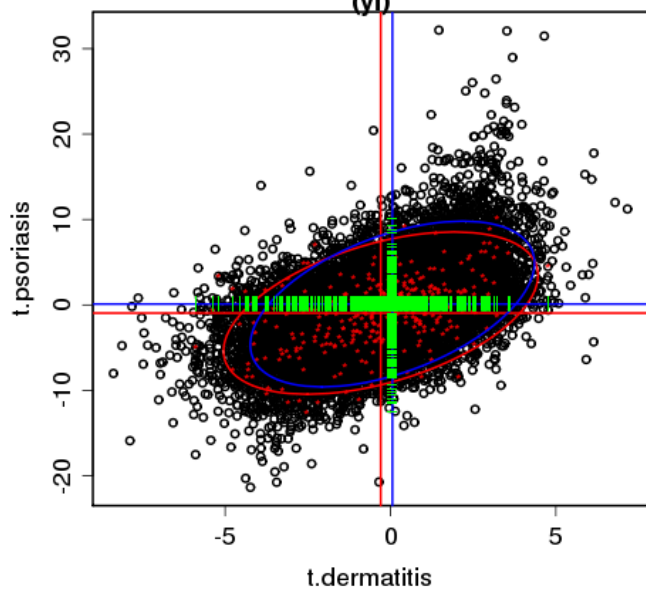

**GO:0016049**  
**cell growth**  
(yl)

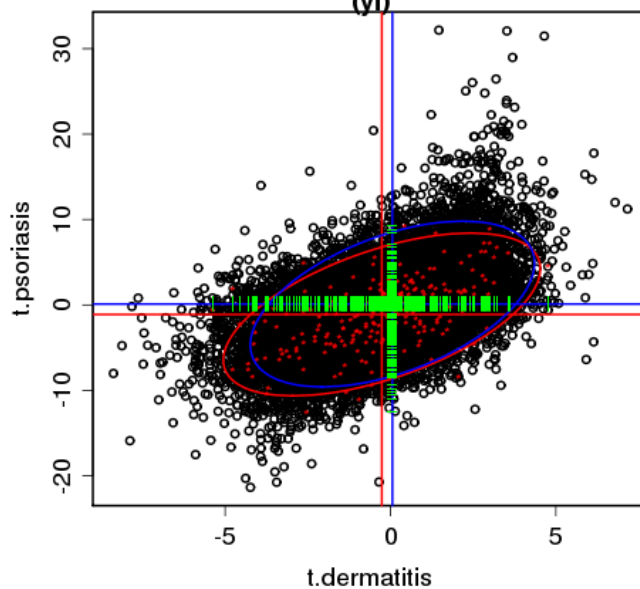

**GO:0007519**  
**skeletal muscle development**  
(yl)

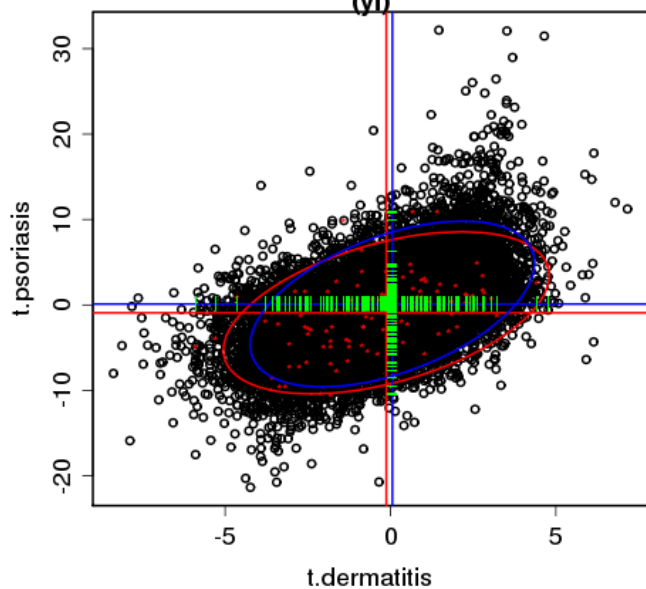

**GO:0000271**  
**polysaccharide biosynthetic process**  
(yl)

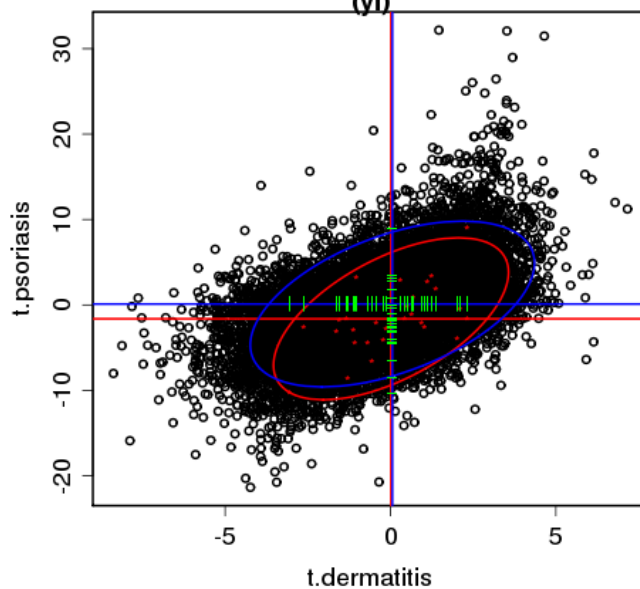



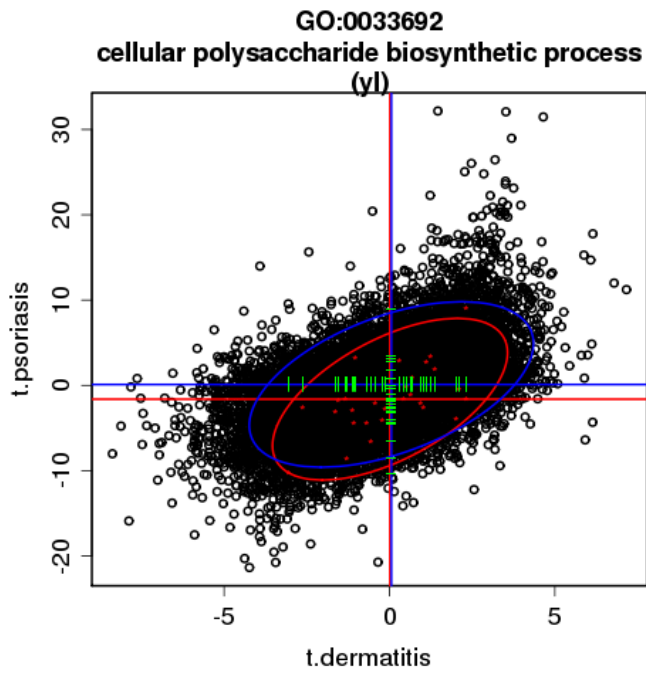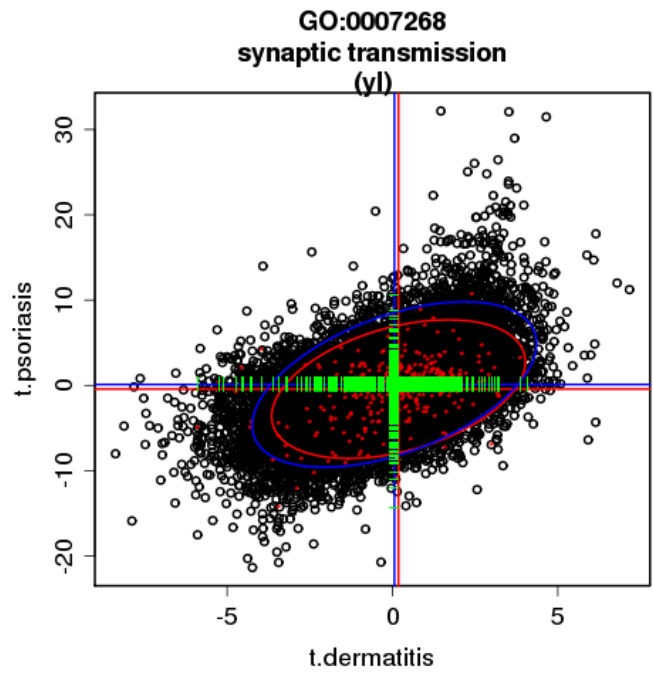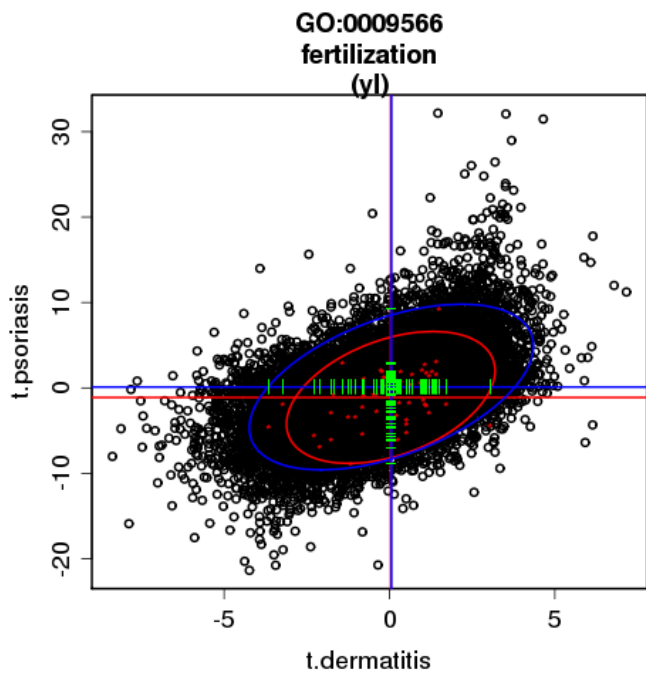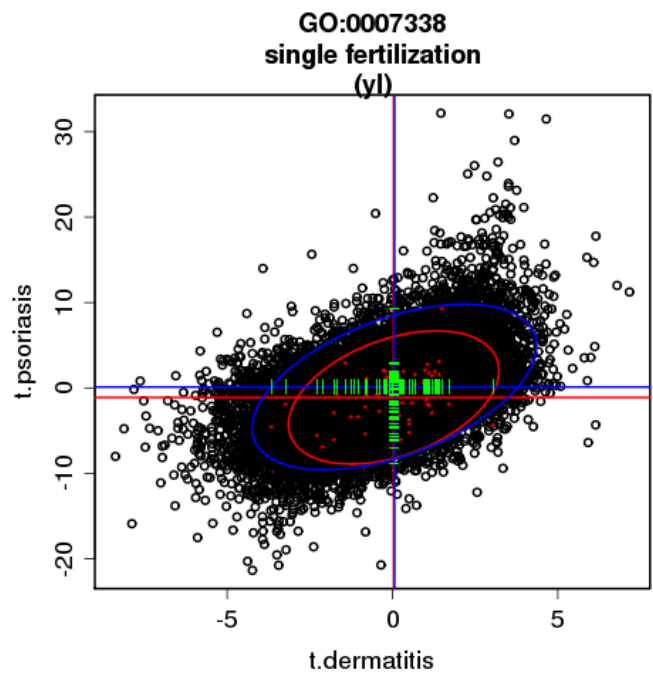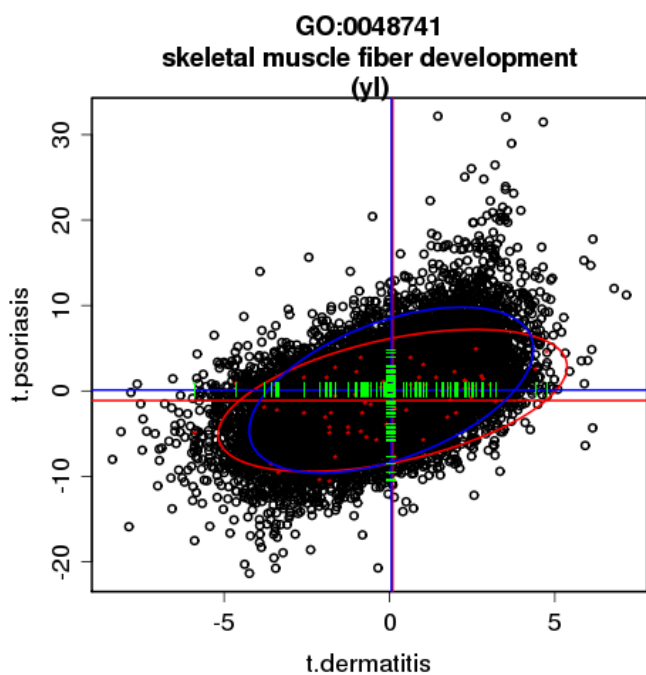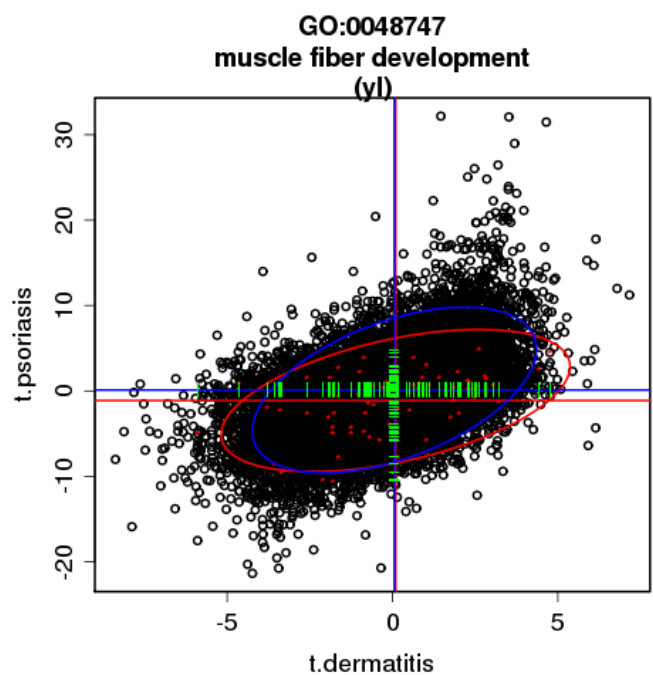

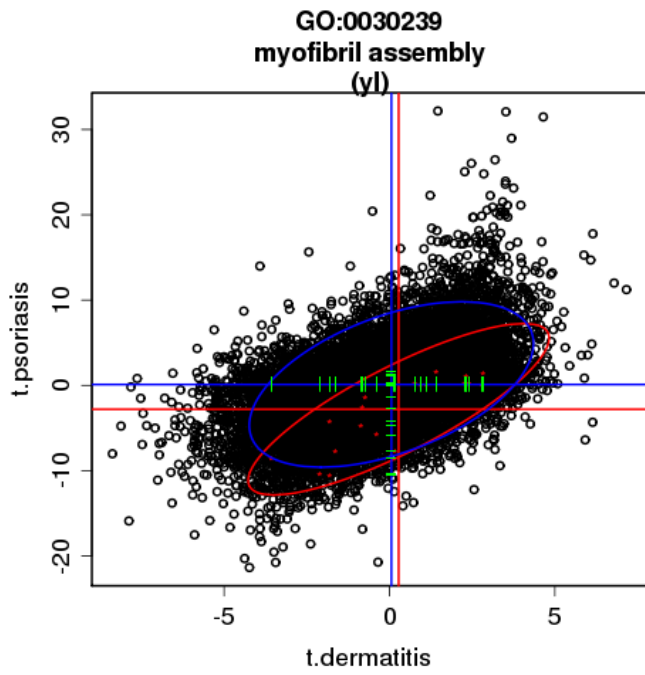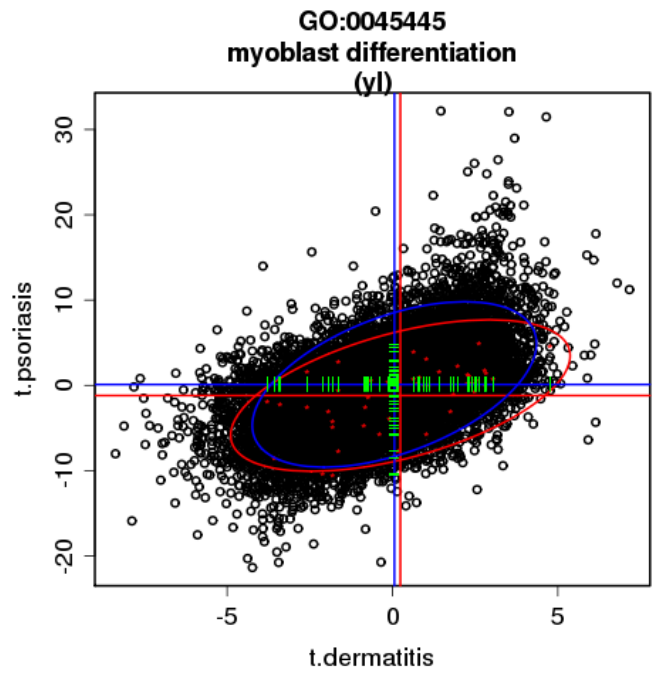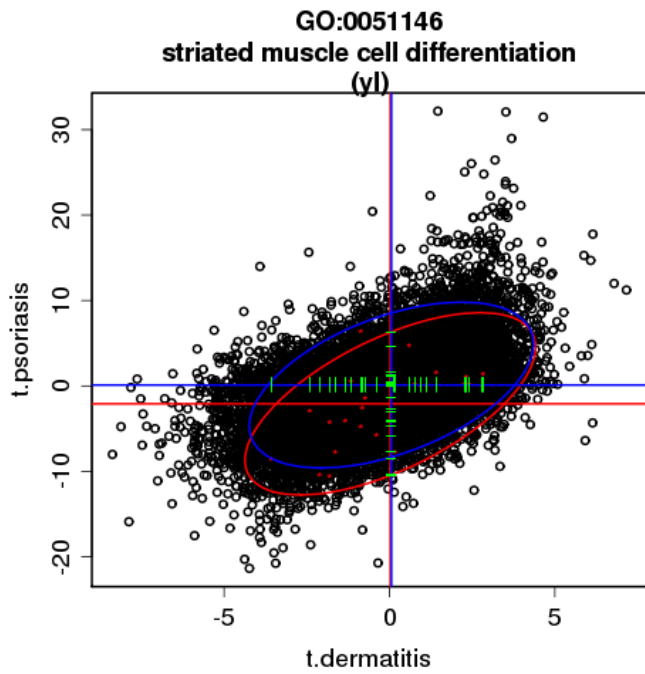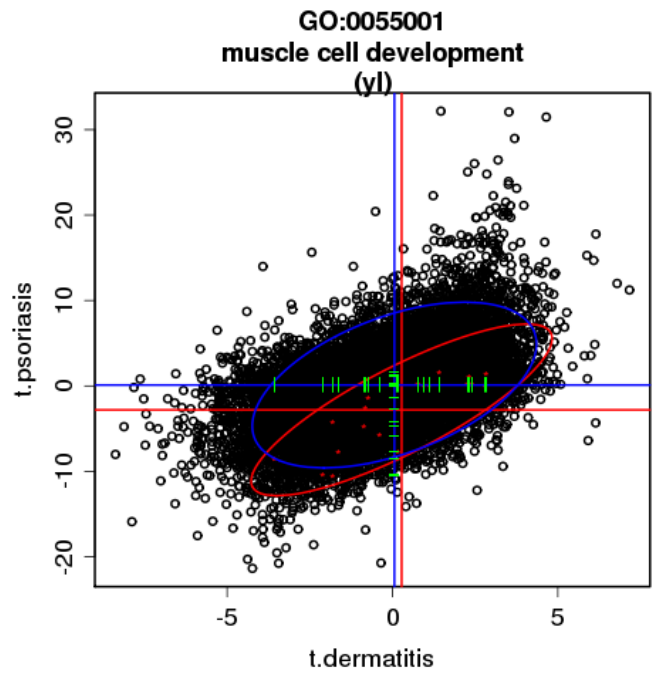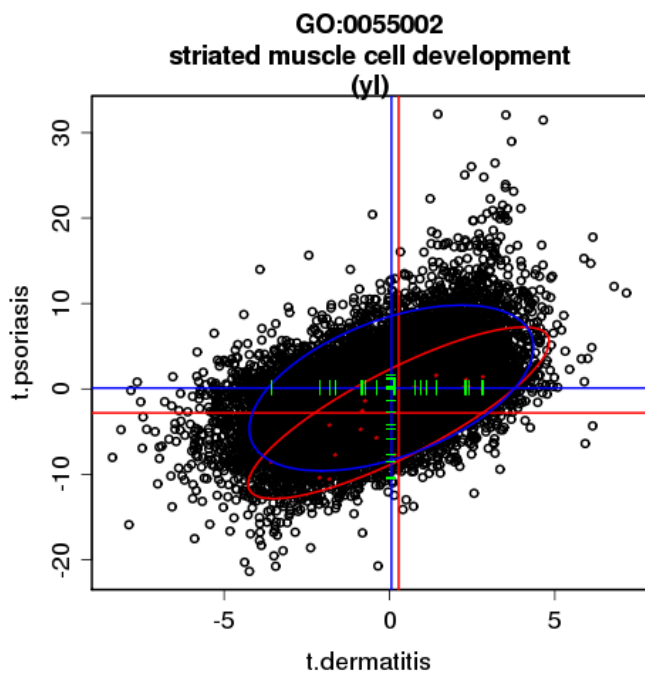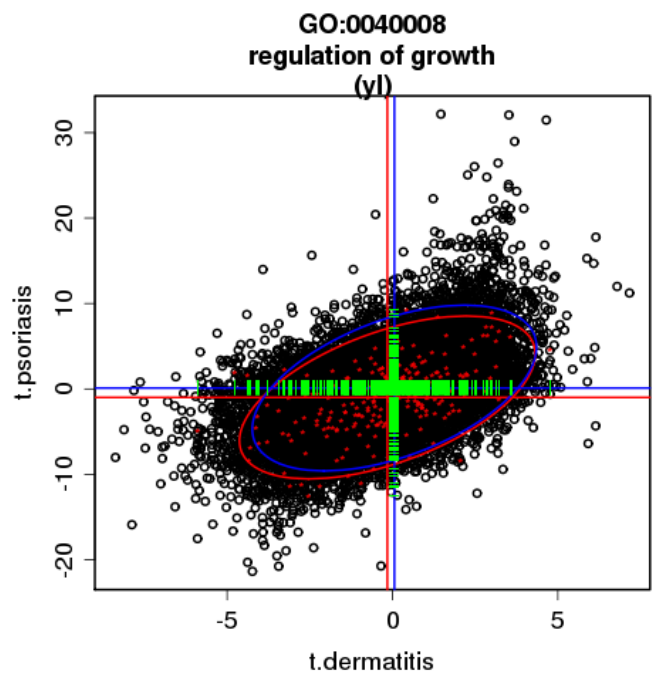

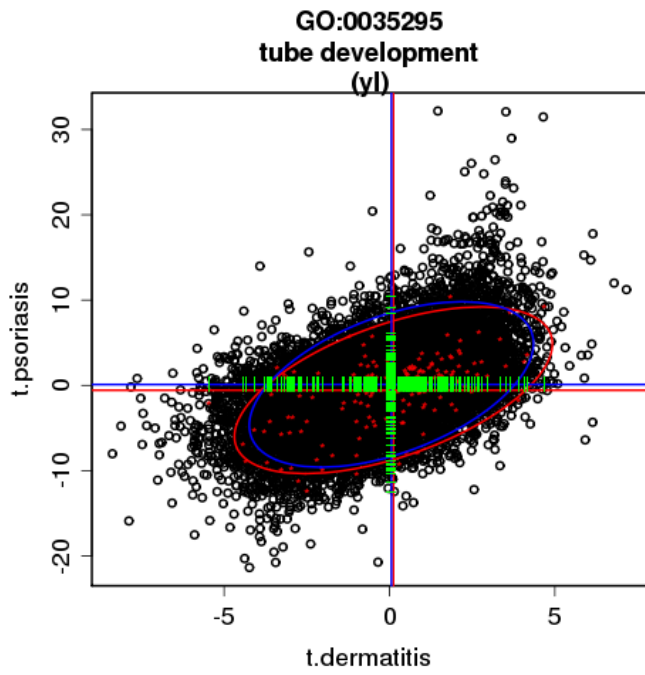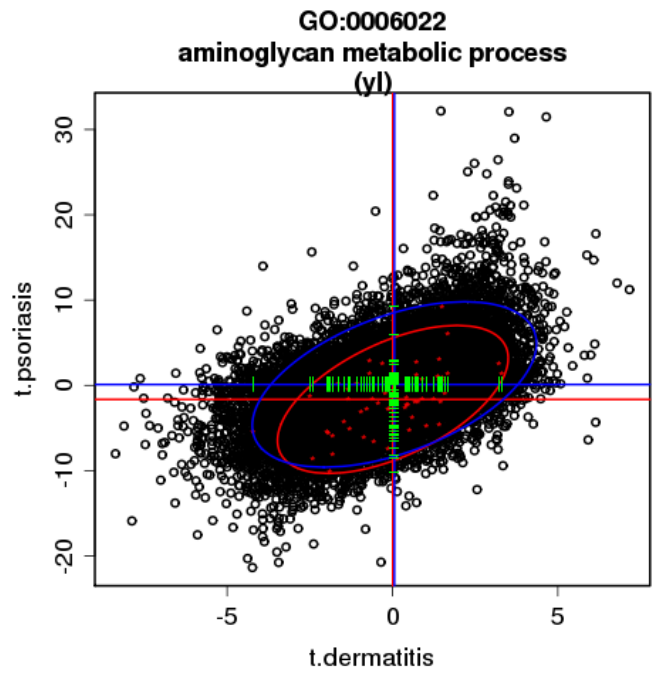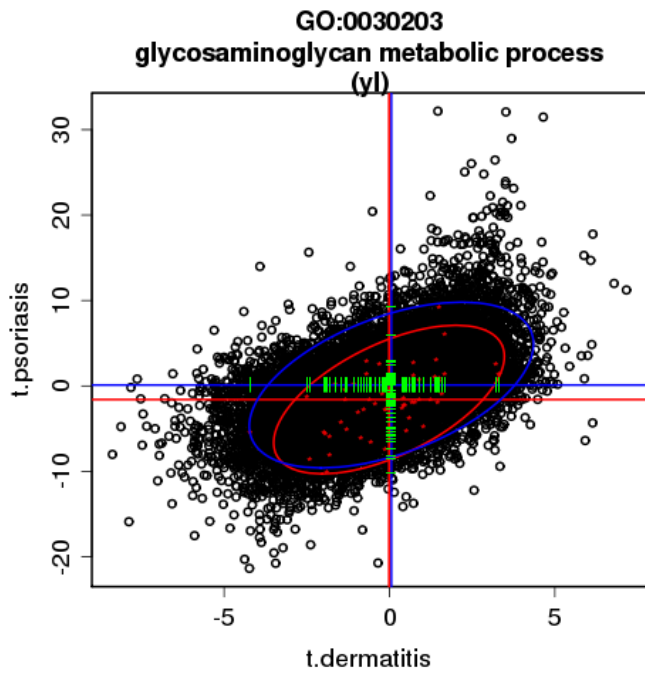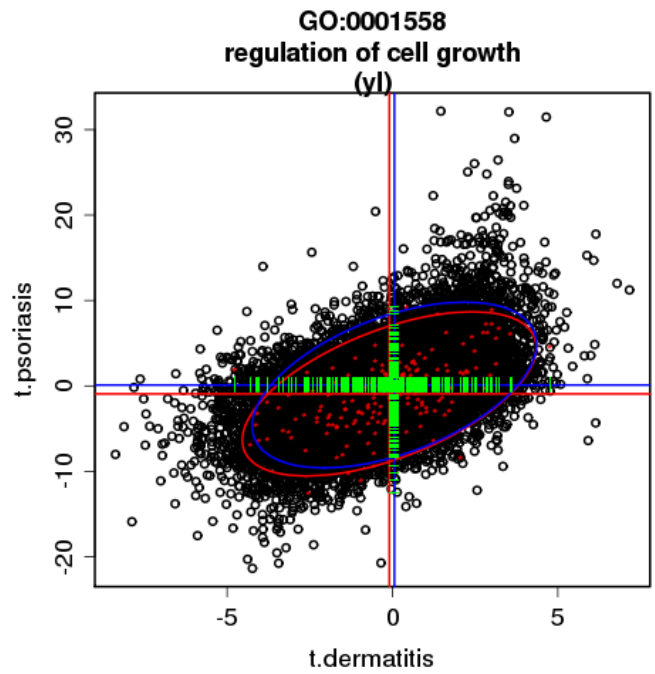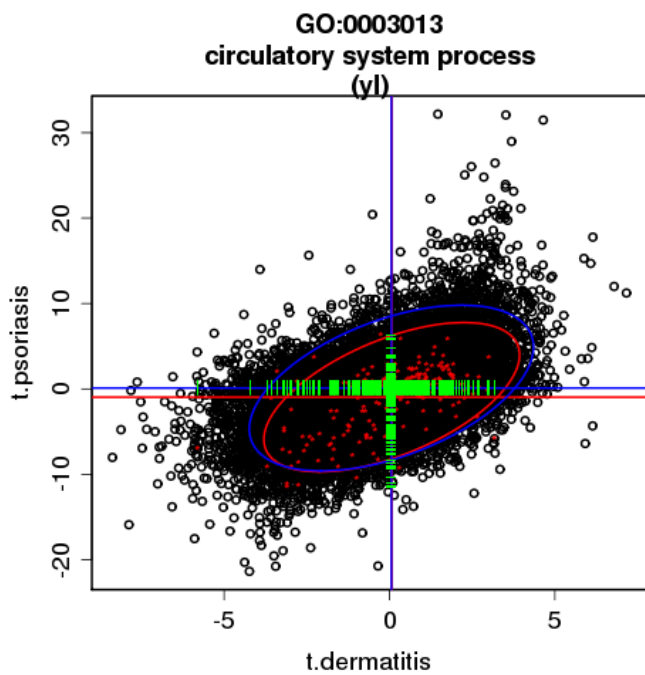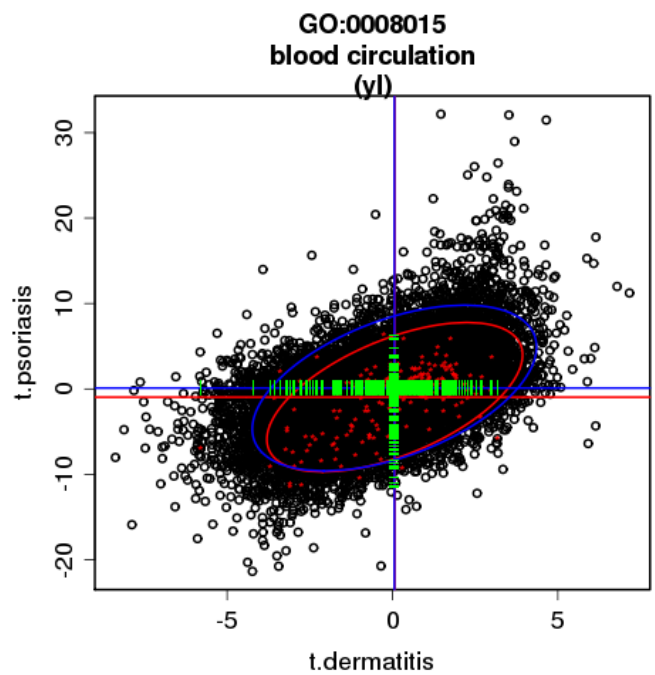

**GO:0002541**  
**activation of plasma proteins during acute inflammatory response**  
(yl)

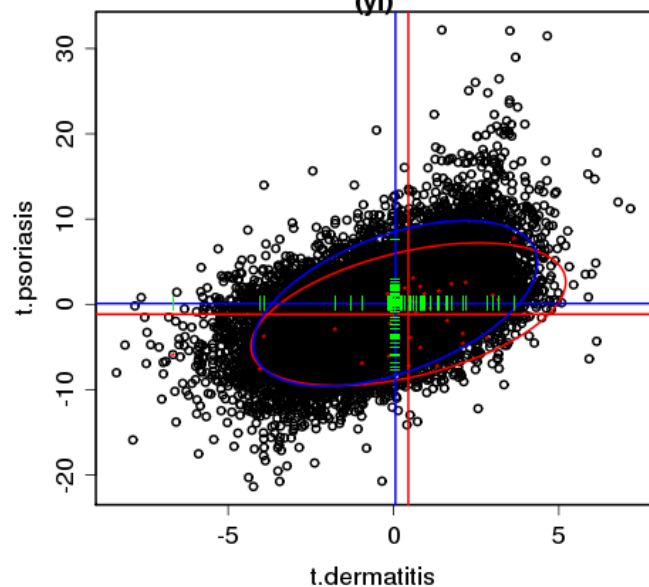

**GO:0006956**  
**complement activation**  
(yl)

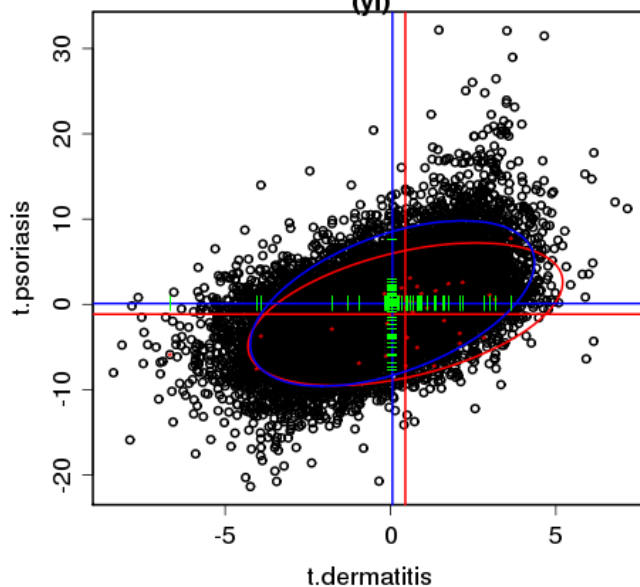

**GO:0006575**  
**amino acid derivative metabolic process**  
(yl)

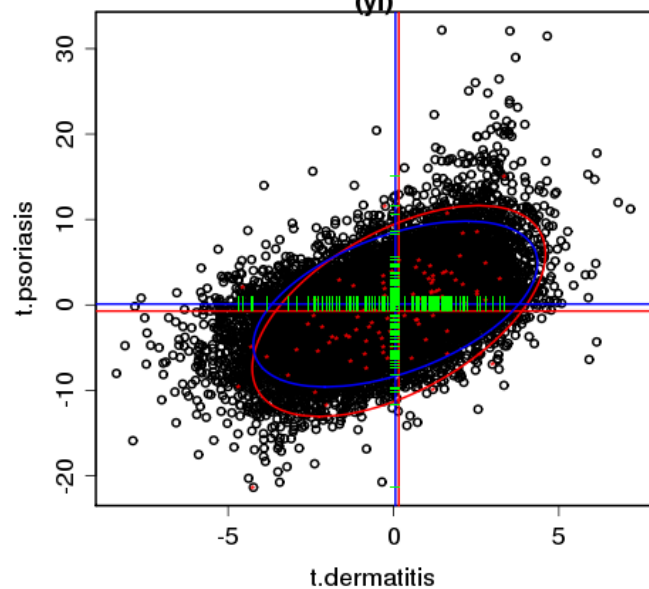

**GO:0018958**  
**phenol metabolic process**  
(yl)

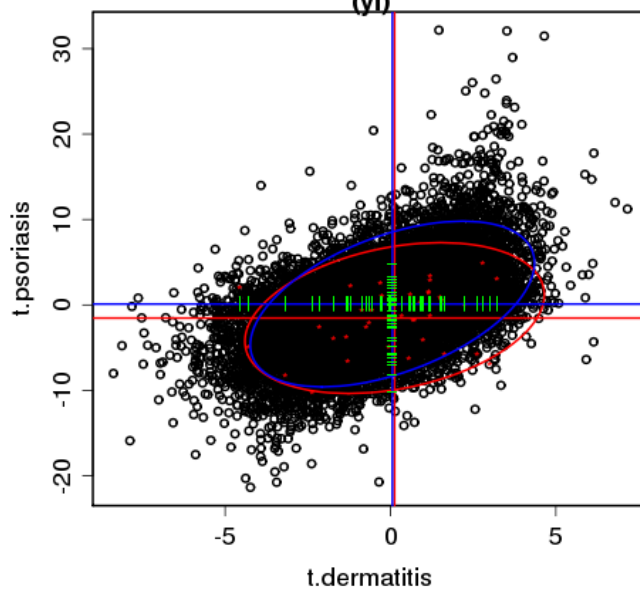

**GO:0003018**  
**vascular process in circulatory system**  
(yl)

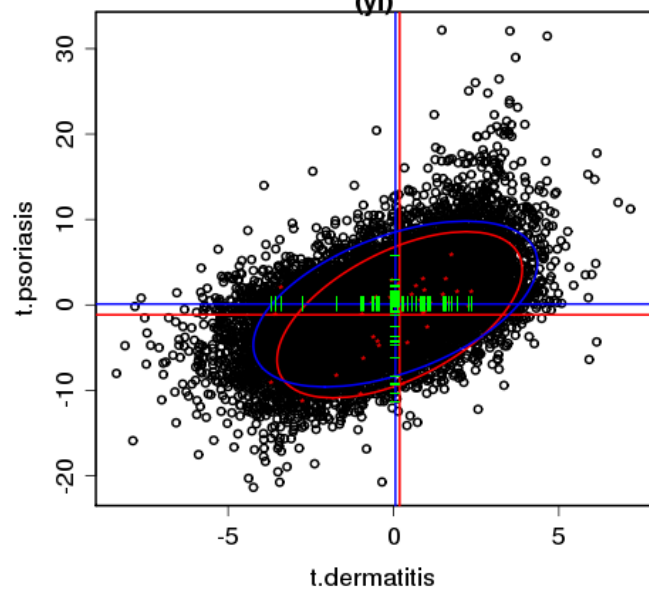

**GO:0019229**  
**regulation of vasoconstriction**  
(yl)

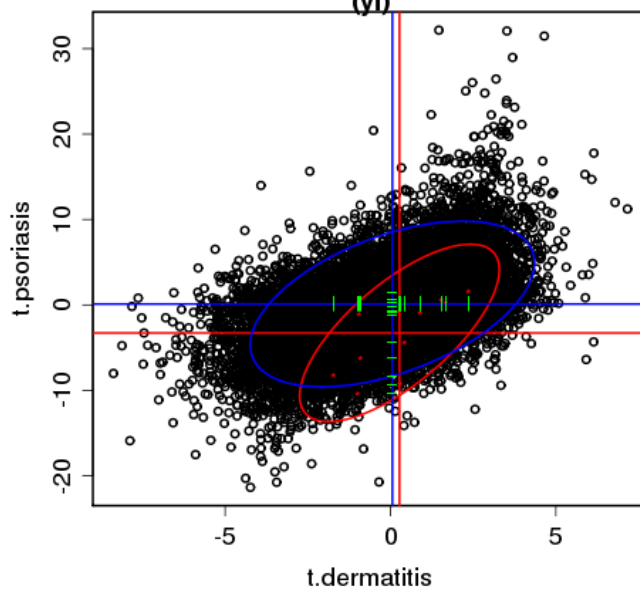

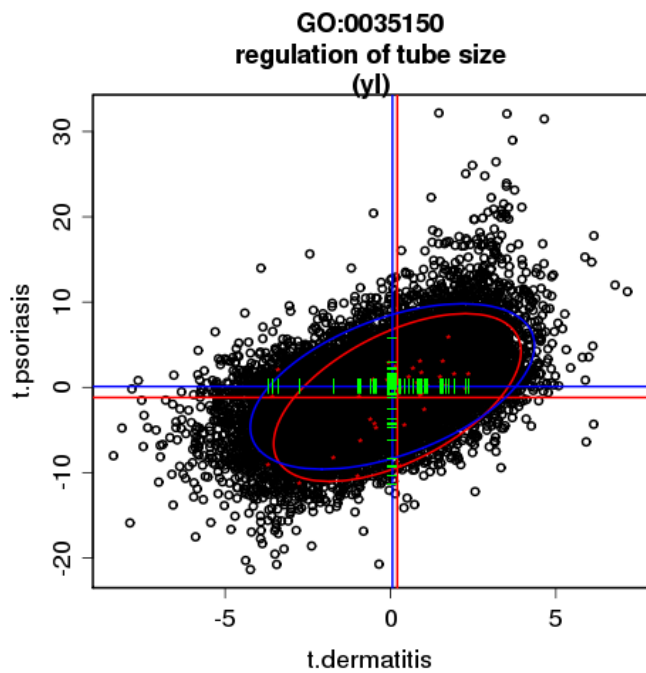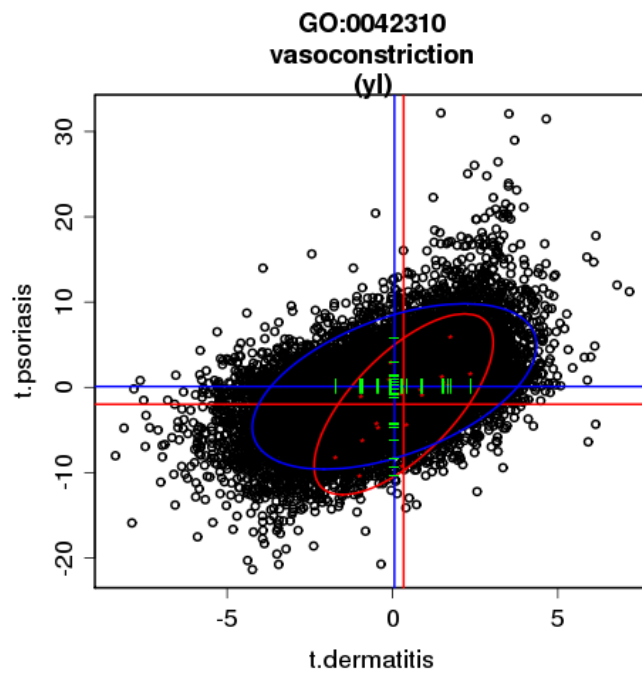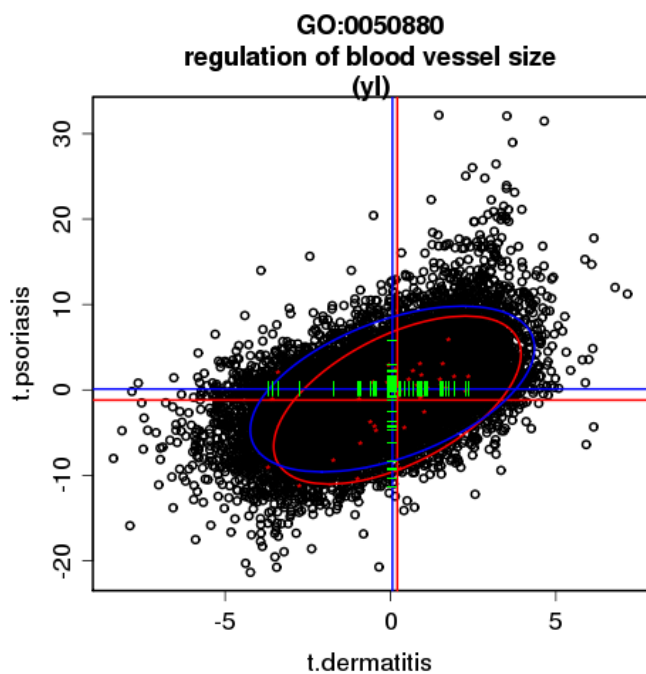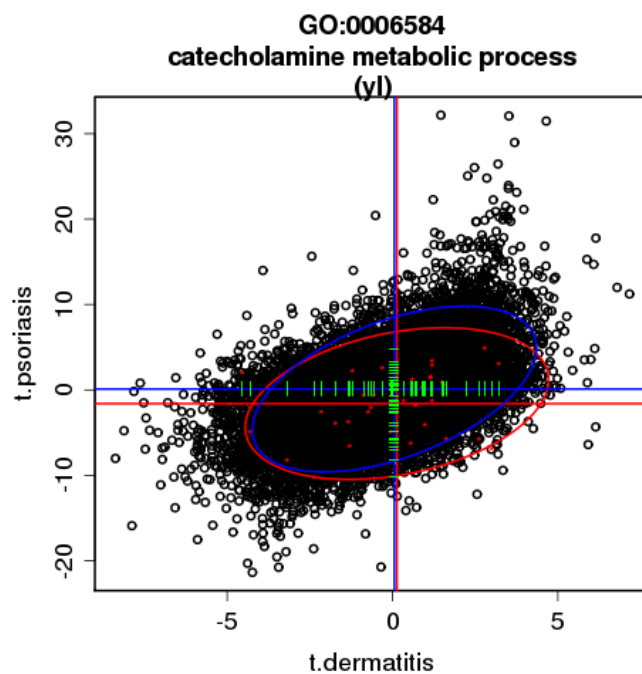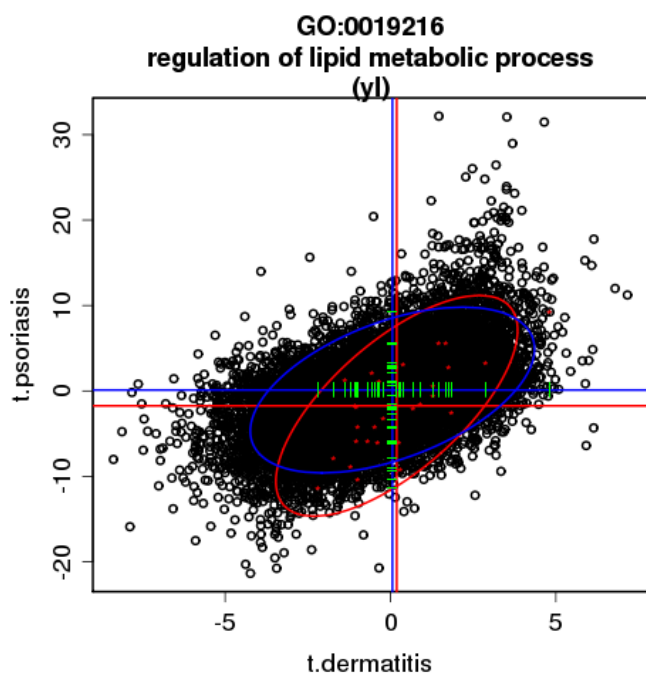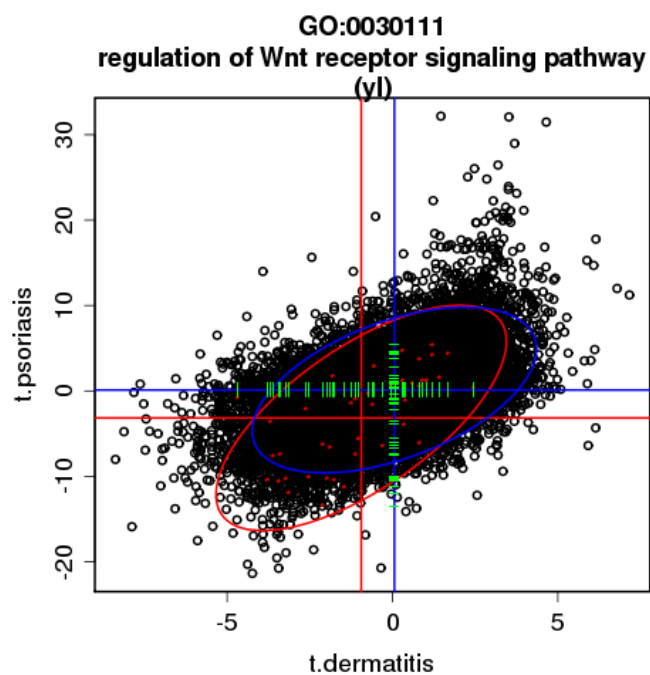

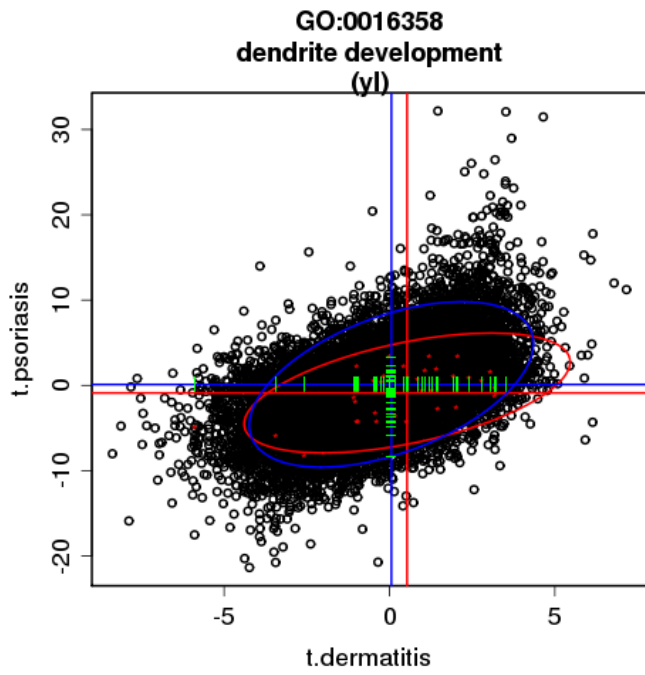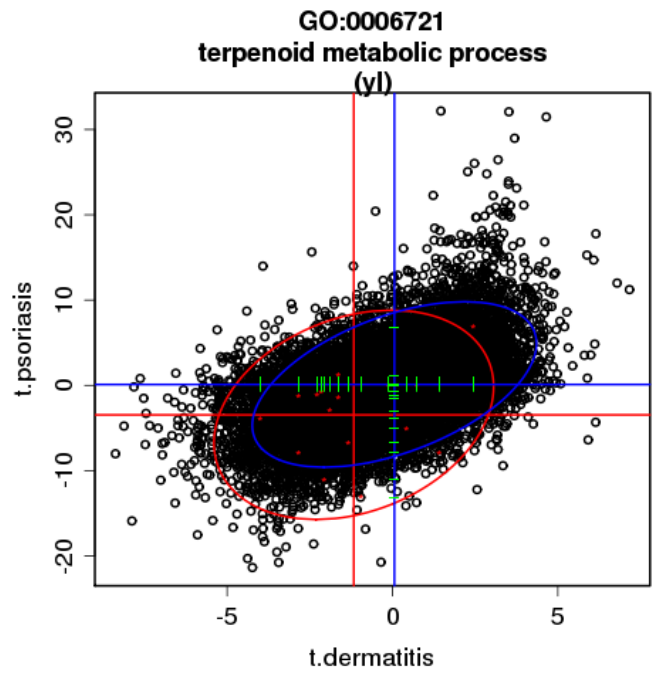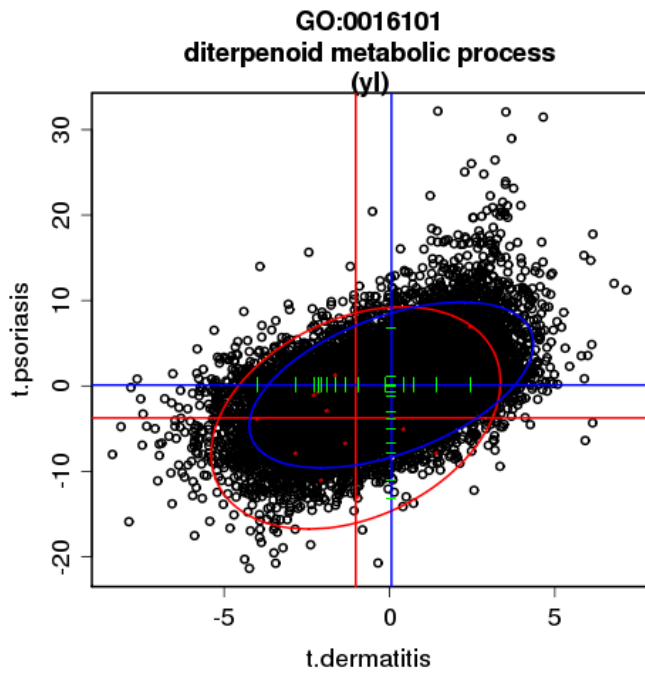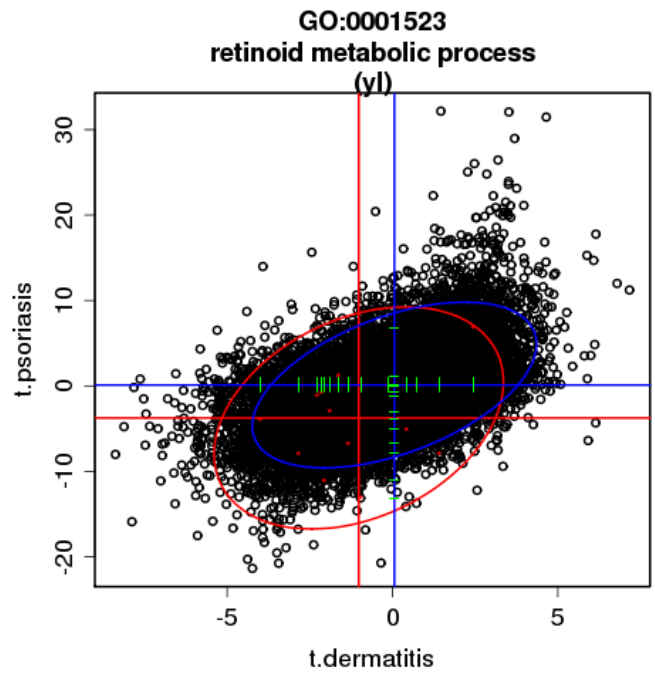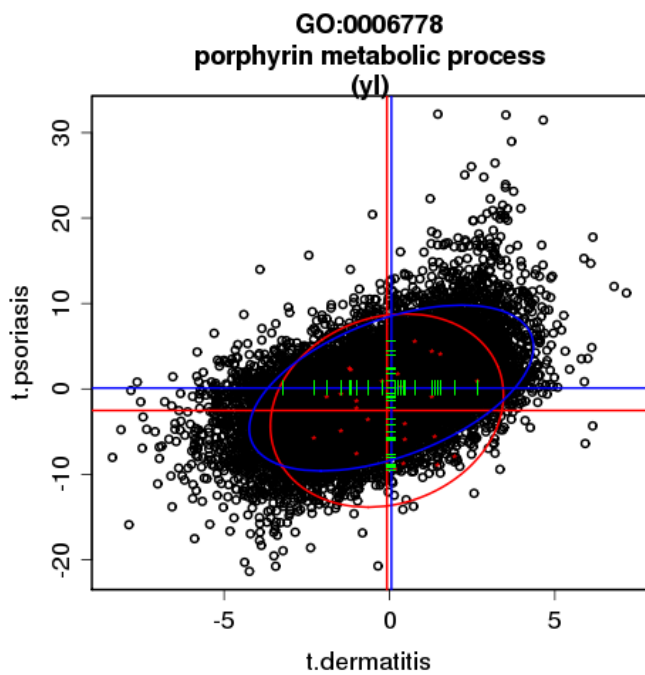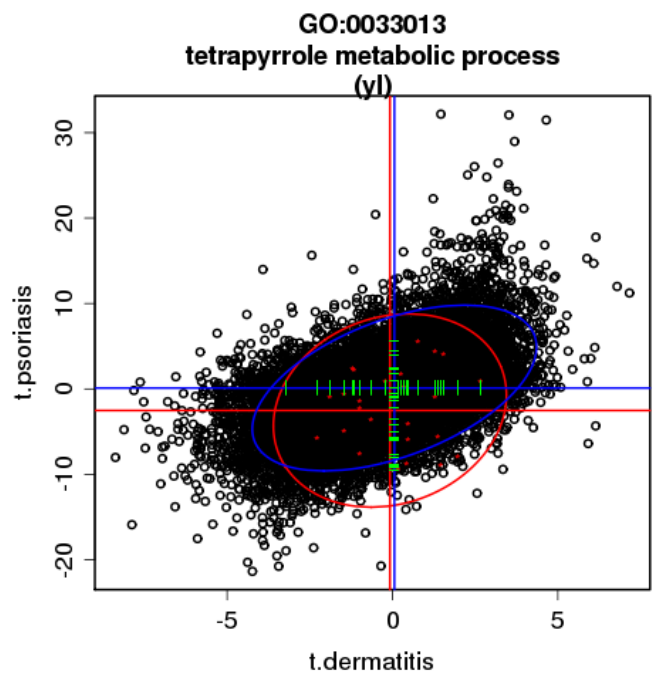



GO:0006779  
porphyrin biosynthetic process  
(yl)

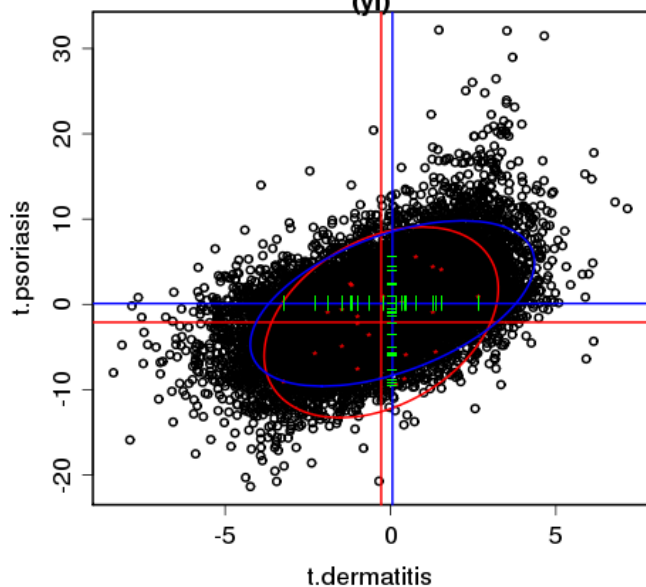

GO:0033014  
tetrapyrrole biosynthetic process  
(yl)

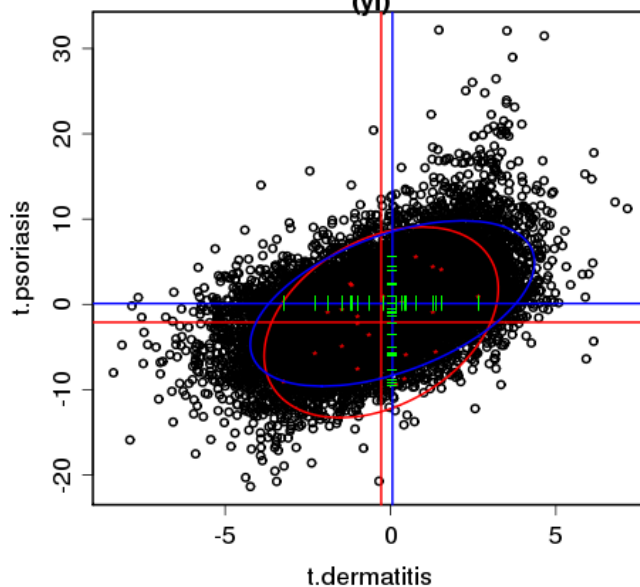

GO:0042168  
heme metabolic process  
(yl)

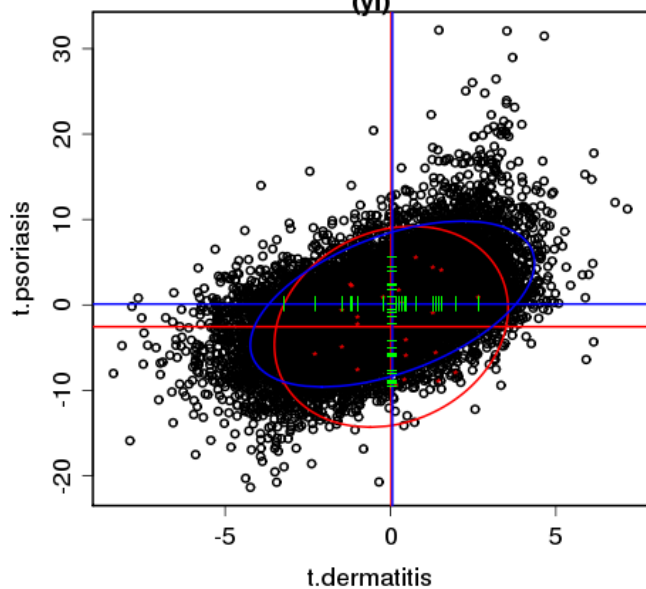

GO:0006783  
heme biosynthetic process  
(yl)

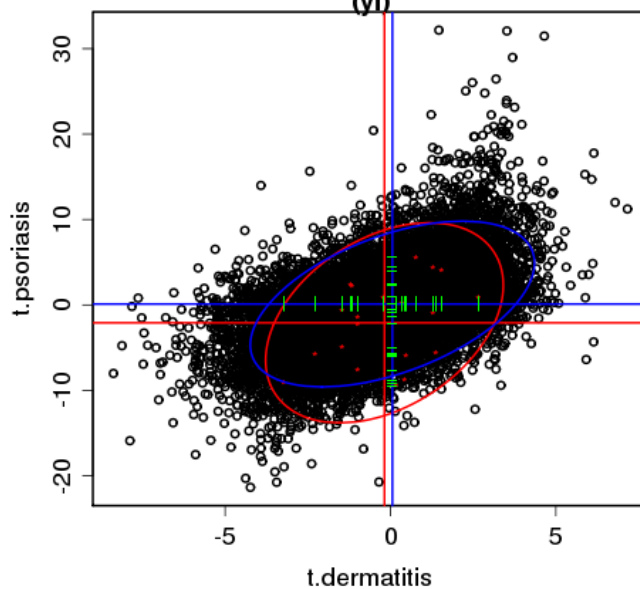

GO:0006937  
regulation of muscle contraction  
(yl)

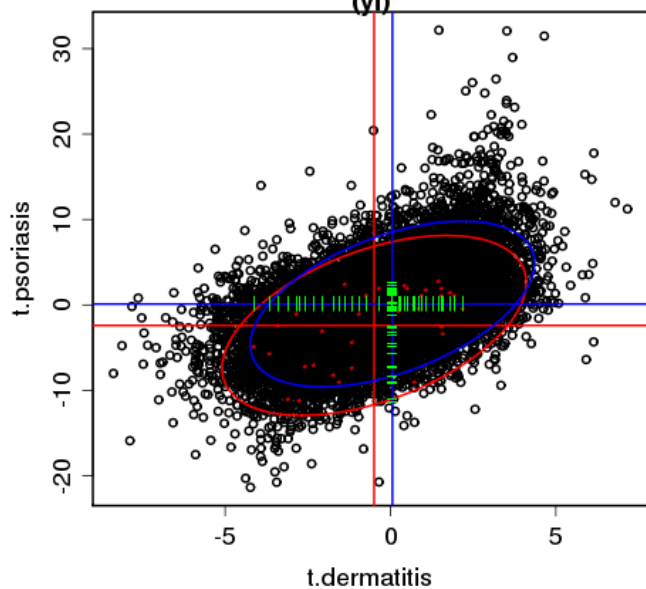

GO:0001936  
regulation of endothelial cell proliferation  
(yl)

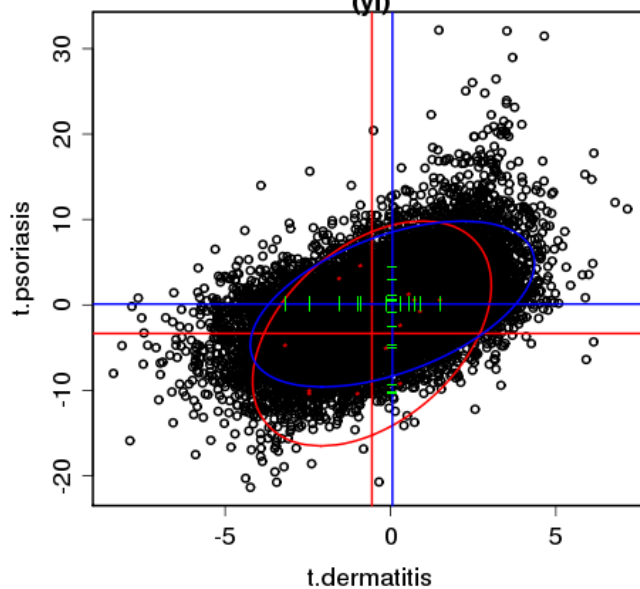

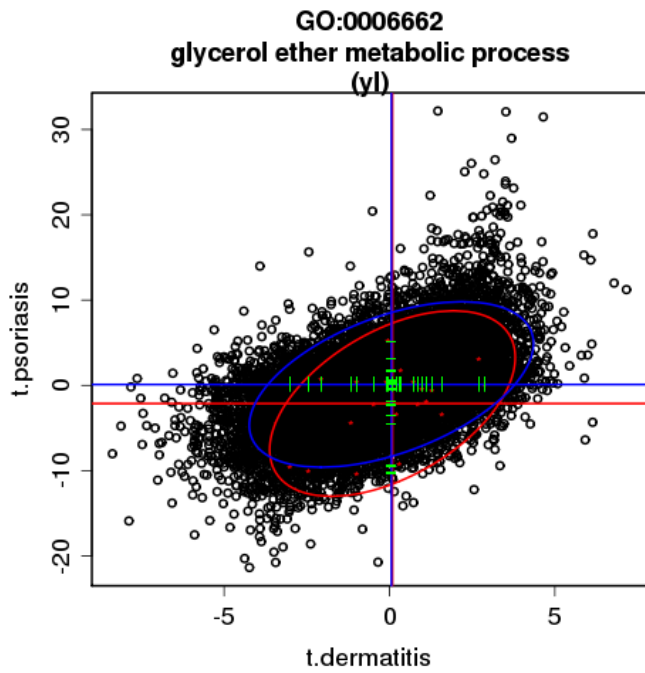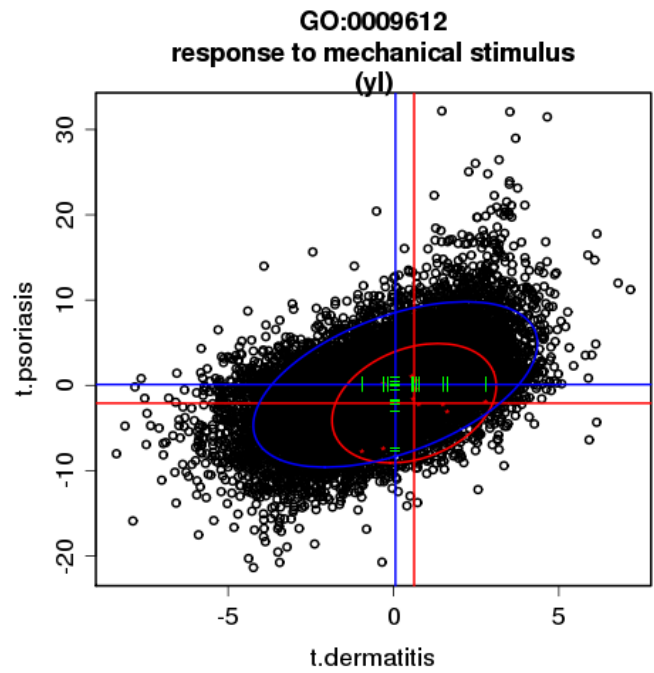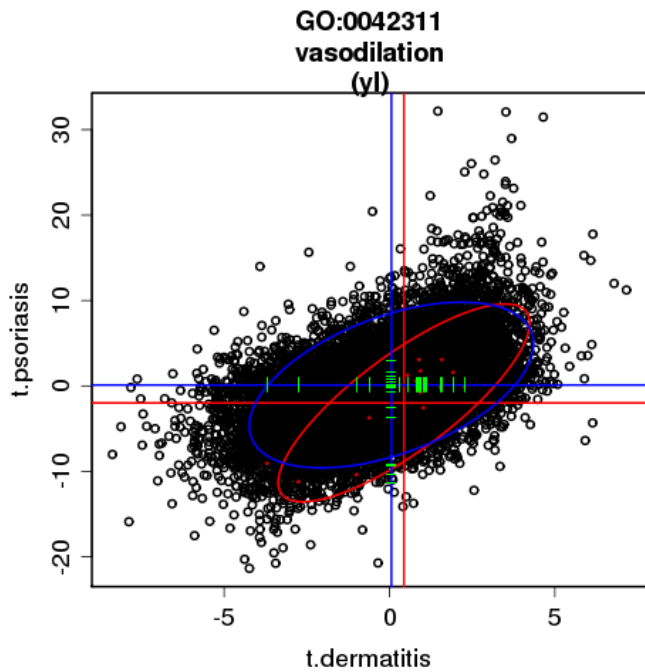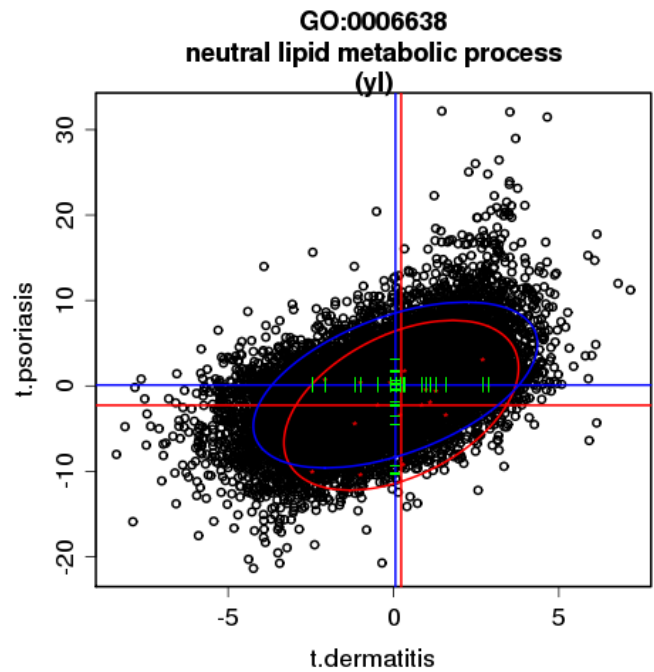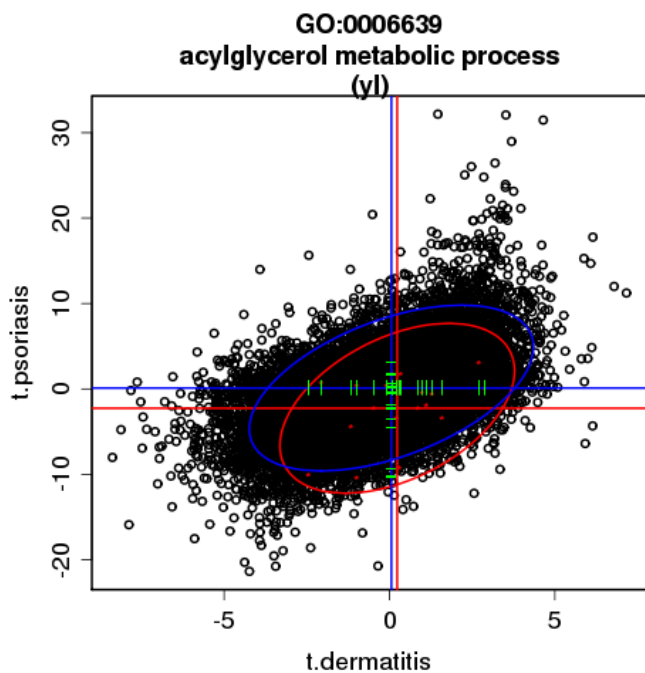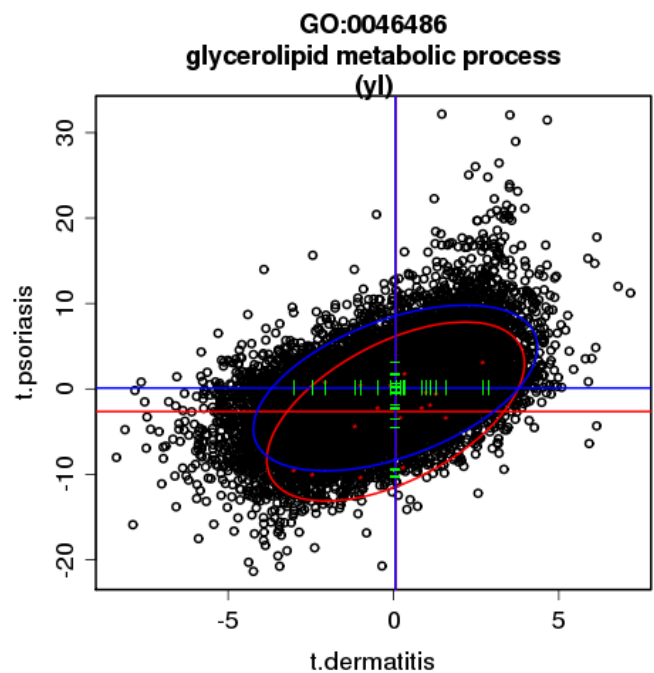

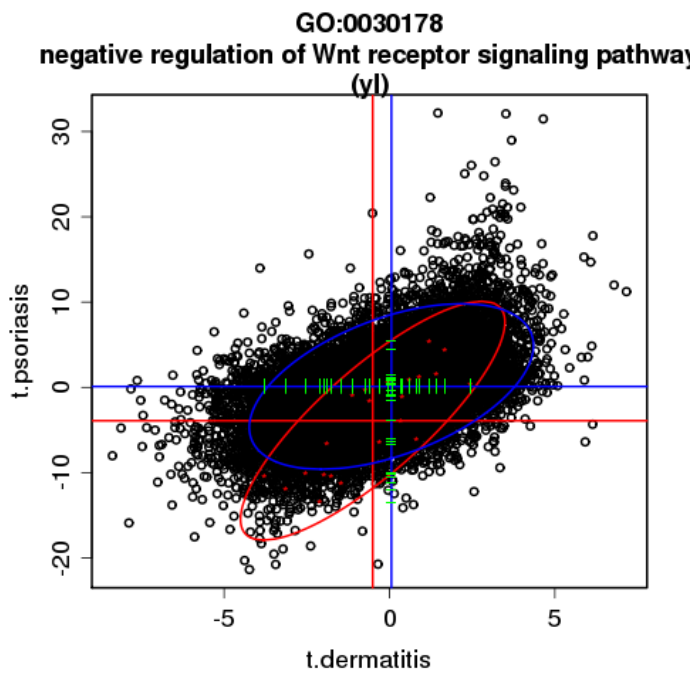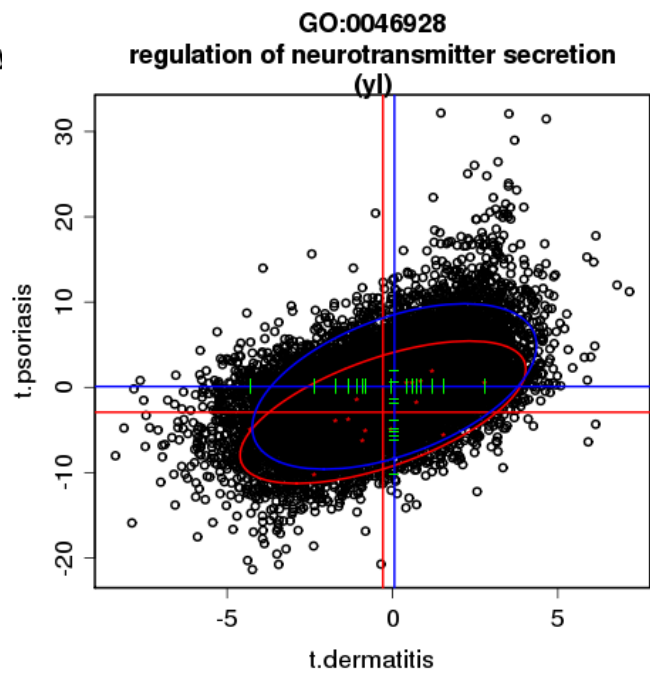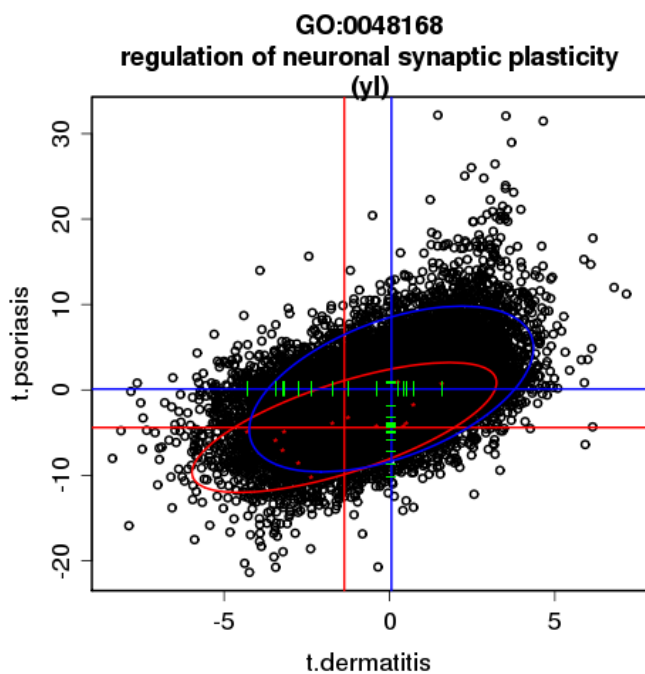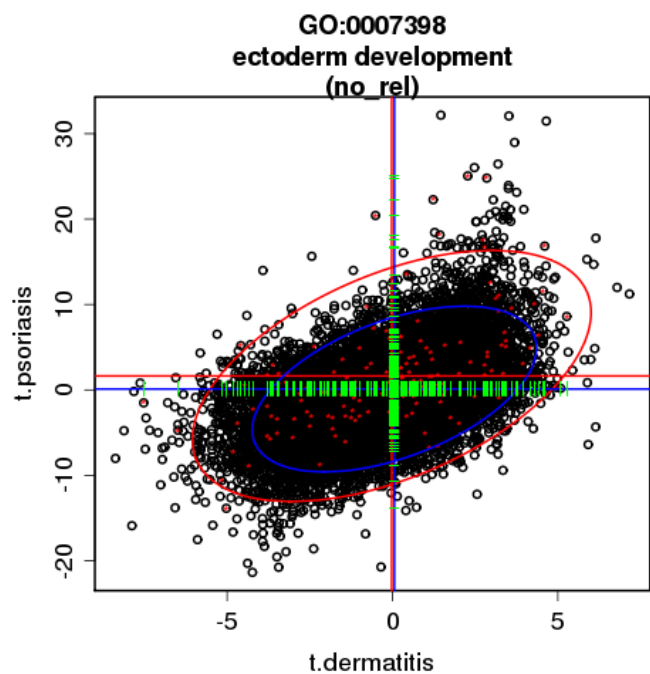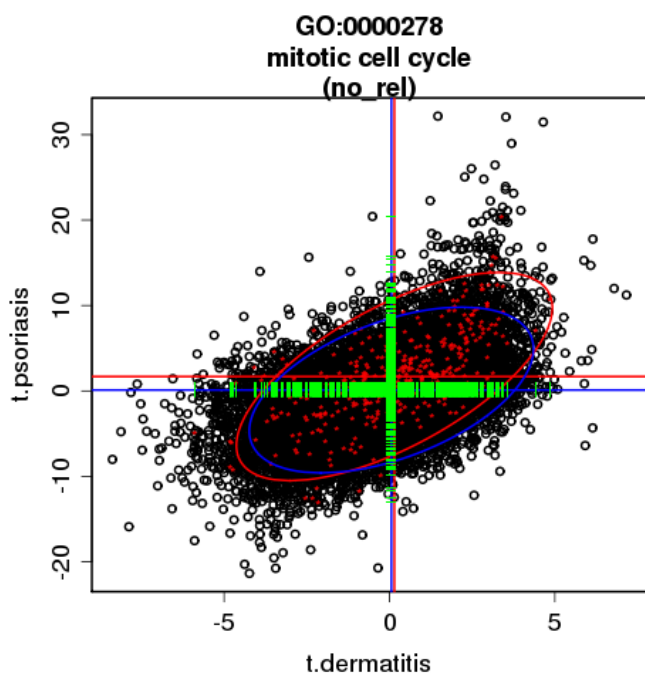

Supplement: S9 (10.1371/journal.pone.0010348.s009) [file journal.pone.0010348.s009]
