# Supplementary material for: Multidimensional Gene Set Analysis of Genomic Data
Source: PLOS journal article supplement (doi:10.1371/journal.pone.0010348), 2010-04-27

# Combined functional profiling of dermatitis and psoriasis datasets using KEGG pathways

31 significant modules

**LOR** indicates Log Odds Ratio of the coefficient or the interaction

**p** indicates FDR adjusted p-value

|       | LOR t d | LOR t p | LOR In-<br>ter | p t d | p t p | p Inter | pattern | name                                                       |
|-------|---------|---------|----------------|-------|-------|---------|---------|------------------------------------------------------------|
| 00920 | -0.35   | -1.37   | -1.02          | 0.74  | 0.00  | 0.03    | q4i     | Sulfur metabolism                                          |
| 04080 | 0.11    | -0.03   | 0.17           | 0.70  | 0.91  | 0.04    | b13     | Neuroactive ligand-receptor interaction                    |
| 00120 | -0.08   | -0.04   | 0.31           | 0.91  | 0.93  | 0.01    | b13     | Bile acid biosynthesis                                     |
| 00310 | 0.24    | -0.15   | 0.34           | 0.76  | 0.82  | 0.00    | b13     | Lysine degradation                                         |
| 00632 | -0.30   | -0.57   | -0.97          | 0.78  | 0.53  | 0.03    | b24     | Benzoate degradation via CoA ligation                      |
| 04060 | 0.70    | 0.03    | -0.09          | 0.00  | 0.91  | 0.85    | xh      | Cytokine-cytokine receptor interaction                     |
| 04640 | 0.56    | -0.17   | 0.07           | 0.02  | 0.62  | 0.93    | xh      | Hematopoietic cell lineage                                 |
| 00010 | 0.96    | -0.53   | 0.24           | 0.00  | 0.08  | 0.06    | xh      | Glycolysis / Gluconeogenesis                               |
| 04650 | 0.72    | 0.35    | -0.22          | 0.00  | 0.12  | 0.31    | xh      | Natural killer cell mediated cytotoxicity                  |
| 04612 | 0.77    | 0.42    | -0.31          | 0.00  | 0.10  | 0.19    | xh      | Antigen processing and presentation                        |
| 04210 | 0.62    | 0.06    | -0.04          | 0.01  | 0.91  | 0.96    | xh      | Apoptosis                                                  |
| 05050 | 1.36    | -0.76   | 0.28           | 0.01  | 0.14  | 0.18    | xh      | Dentatorubropallidoluysian atrophy (DR-PLA)                |
| 04940 | 1.01    | 0.10    | -0.22          | 0.00  | 0.90  | 0.72    | xh      | Type I diabetes mellitus                                   |
| 05040 | 1.01    | -0.19   | -0.25          | 0.01  | 0.90  | 0.93    | xh      | Huntington's disease                                       |
| 04662 | 0.68    | -0.34   | 0.15           | 0.04  | 0.34  | 0.70    | xh      | B cell receptor signaling pathway                          |
| 05131 | 0.83    | -0.13   | -0.05          | 0.02  | 0.90  | 0.96    | xh      | Pathogenic Escherichia coli infection - EPEC               |
| 05130 | 0.83    | -0.13   | -0.05          | 0.02  | 0.90  | 0.96    | xh      | Pathogenic Escherichia coli infection - EHEC               |
| 04514 | 0.57    | -0.30   | 0.10           | 0.00  | 0.18  | 0.72    | xh      | Cell adhesion molecules (CAMs)                             |
| 00030 | 1.15    | 0.72    | -0.49          | 0.04  | 0.31  | 0.57    | xh      | Pentose phosphate pathway                                  |
| 04930 | 1.14    | 0.64    | -0.55          | 0.00  | 0.22  | 0.19    | xh      | Type II diabetes mellitus                                  |
| 01040 | -1.11   | -1.00   | -0.63          | 0.02  | 0.18  | 0.27    | xl      | Biosynthesis of unsaturated fatty acids                    |
| 03010 | -1.24   | -0.46   | -0.47          | 0.00  | 0.66  | 0.48    | xl      | Ribosome                                                   |
| 00251 | -0.82   | 0.62    | -0.08          | 0.02  | 0.17  | 0.96    | xl      | Glutamate metabolism                                       |
| 00600 | -0.70   | 0.79    | -0.05          | 0.17  | 0.05  | 0.96    | yh      | Sphingolipid metabolism                                    |
| 00900 | -0.85   | 0.98    | -0.11          | 0.17  | 0.01  | 0.94    | yh      | Terpenoid biosynthesis                                     |
| 00040 | 0.86    | 1.06    | -0.48          | 0.30  | 0.01  | 0.41    | yh      | Pentose and glucuronate interconversions                   |
| 05120 | 0.04    | 0.89    | -0.34          | 0.94  | 0.00  | 0.31    | yh      | Epithelial cell signaling in Helicobacter pylori infection |
| 00100 | -0.72   | 0.74    | -0.10          | 0.08  | 0.05  | 0.94    | yh      | Biosynthesis of steroids                                   |
| 05110 | 0.94    | 0.97    | -0.62          | 0.10  | 0.01  | 0.07    | yh      | Vibrio cholerae infection                                  |
| 00620 | 0.56    | -1.30   | -0.04          | 0.52  | 0.00  | 0.98    | yl      | Pyruvate metabolism                                        |
| 00630 | 0.14    | -1.30   | -0.44          | 0.91  | 0.01  | 0.81    | yl      | Glyoxylate and dicarboxylate metabolism                    |

Table 1: LOR: log odds ratio; p: adjusted p-value FDR

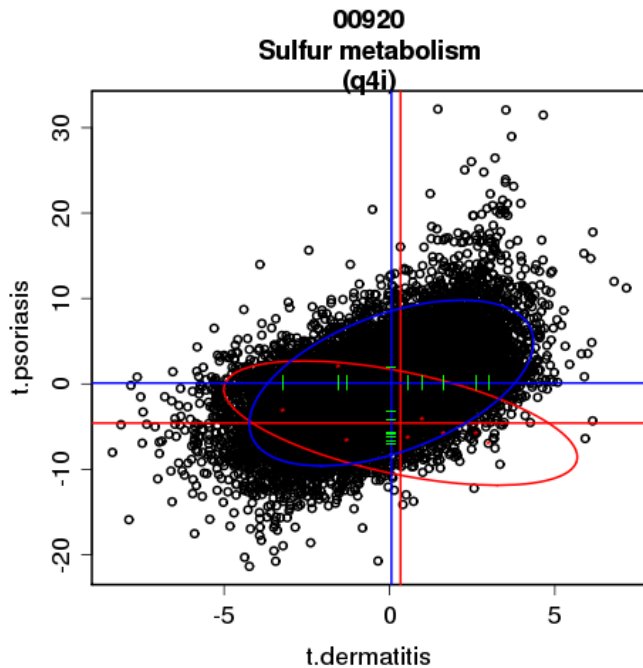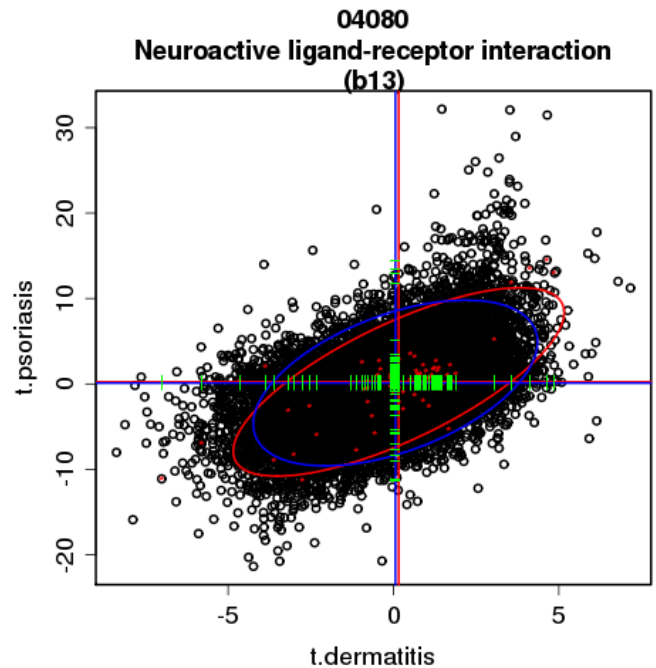

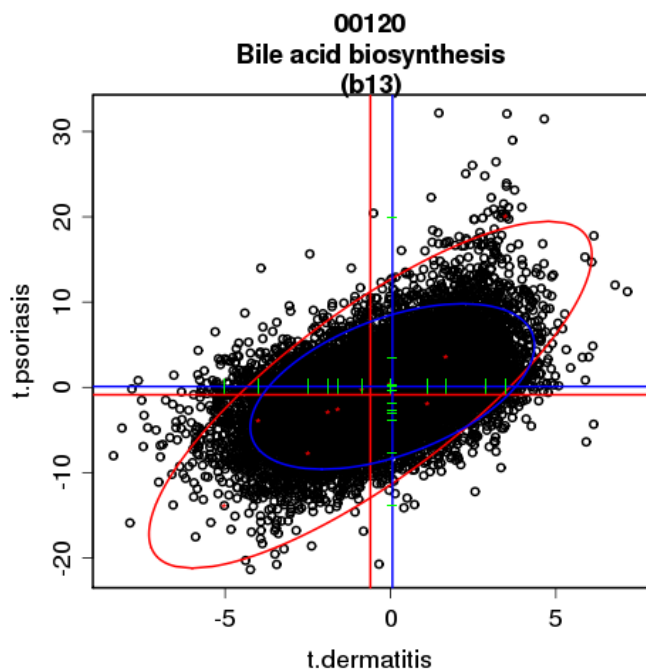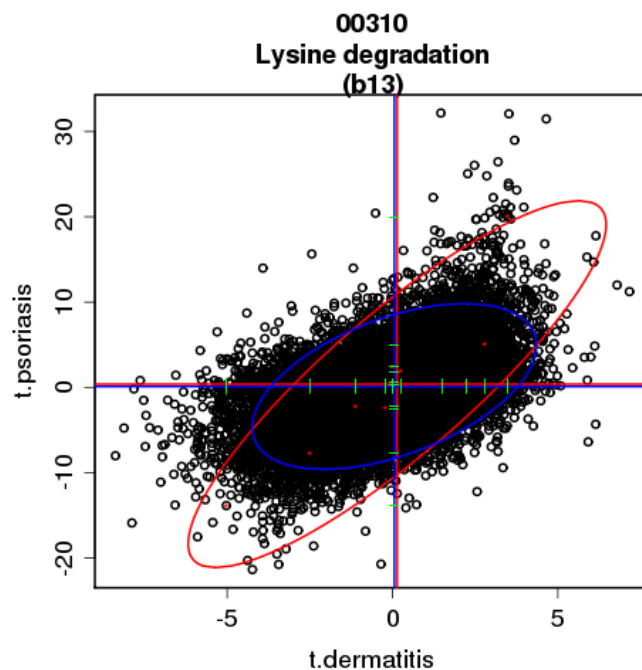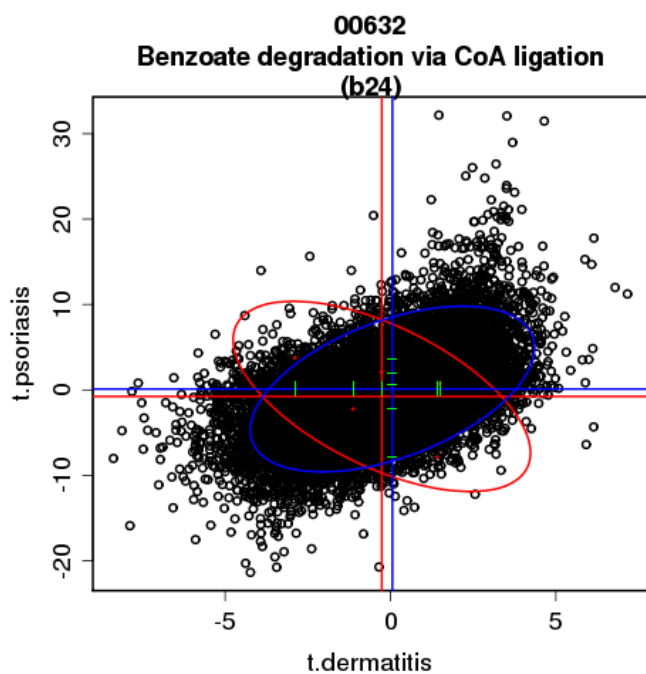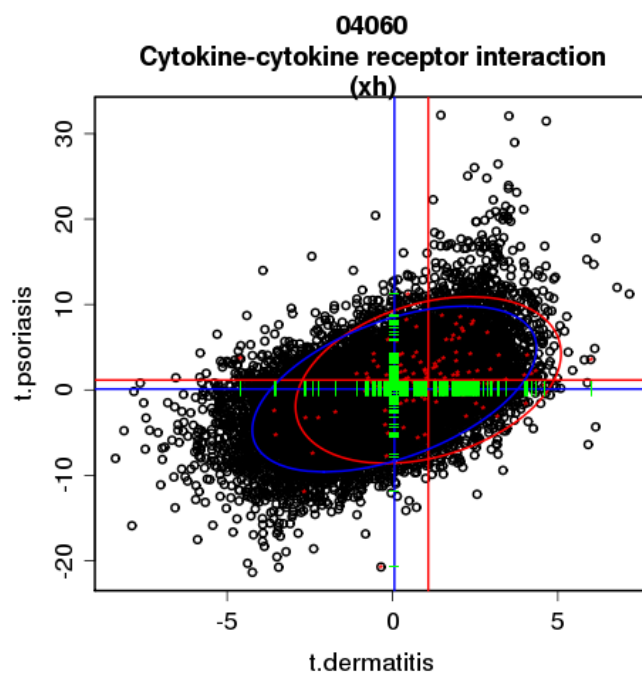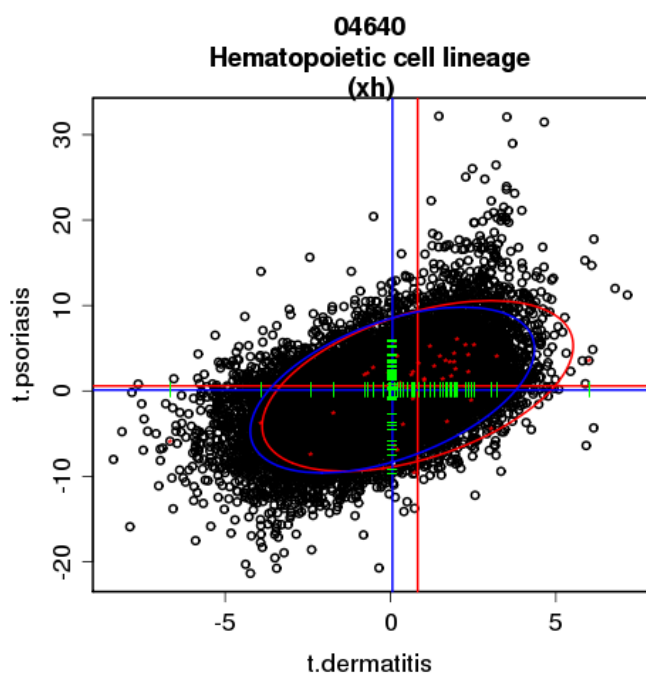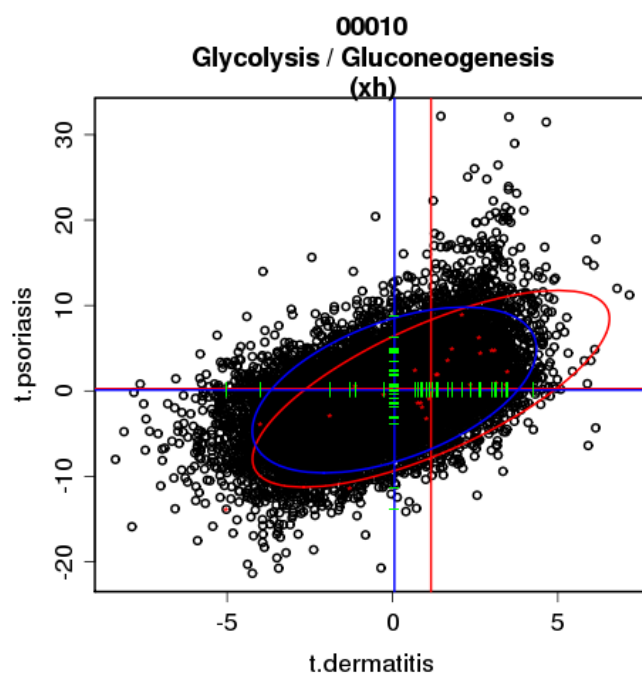

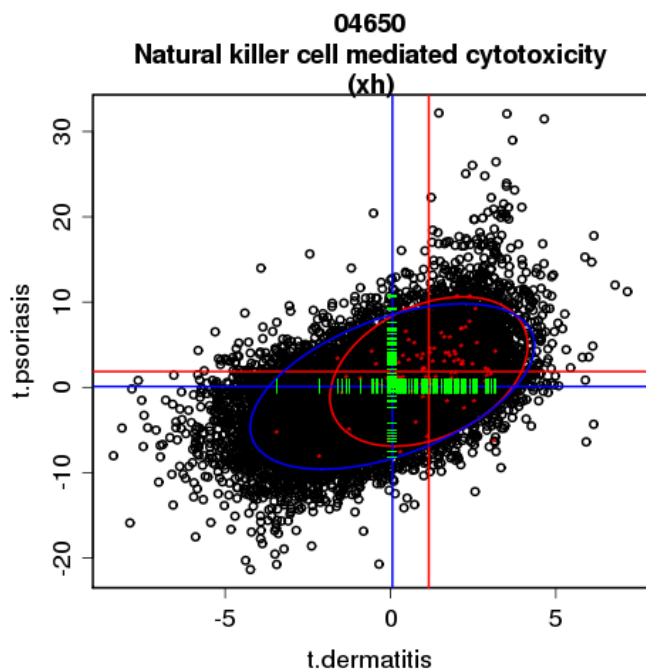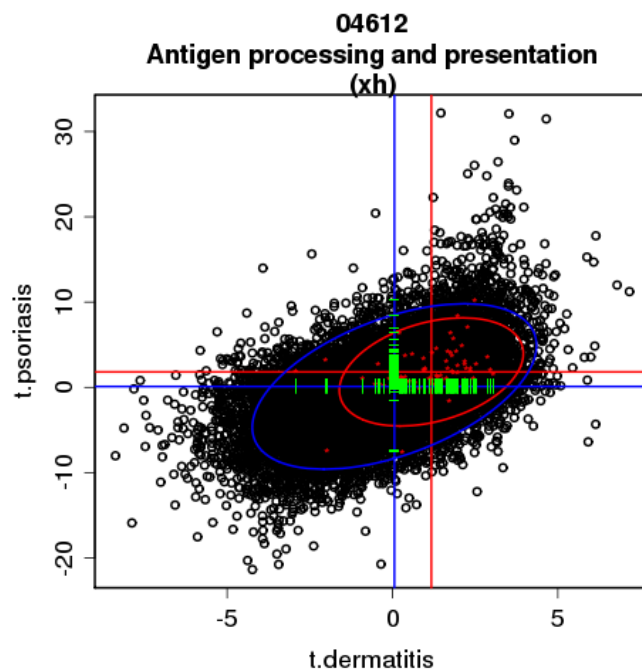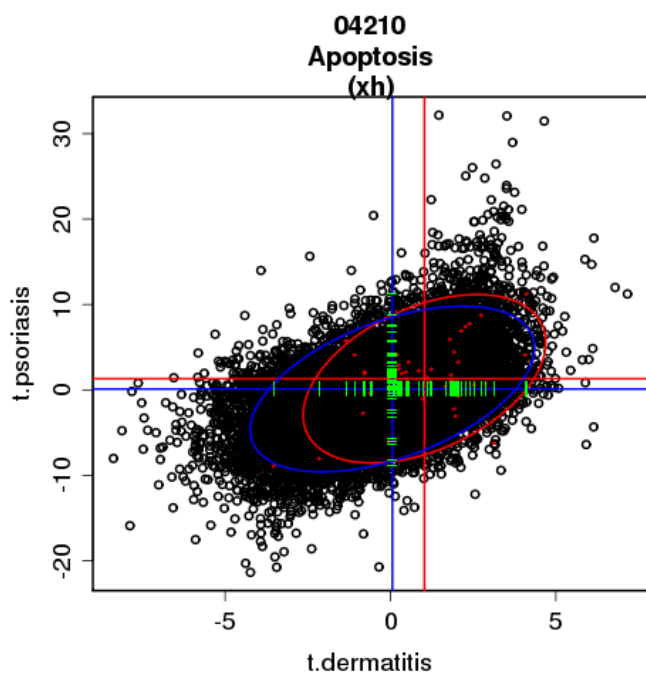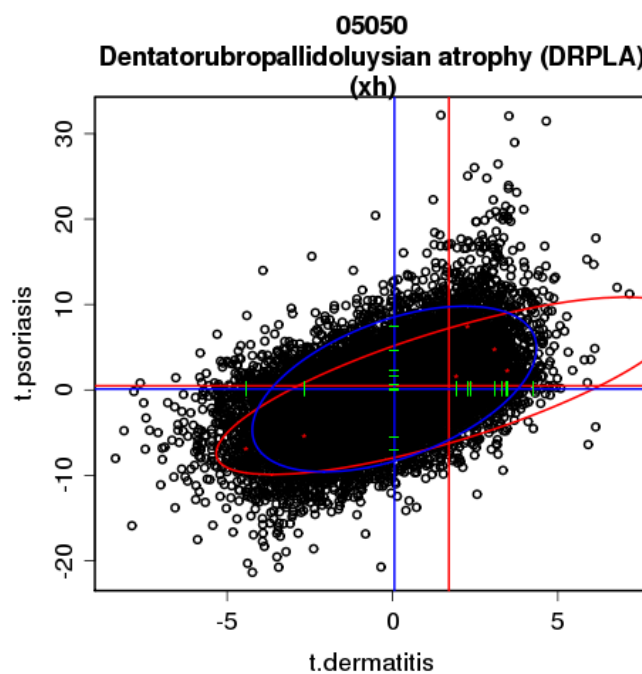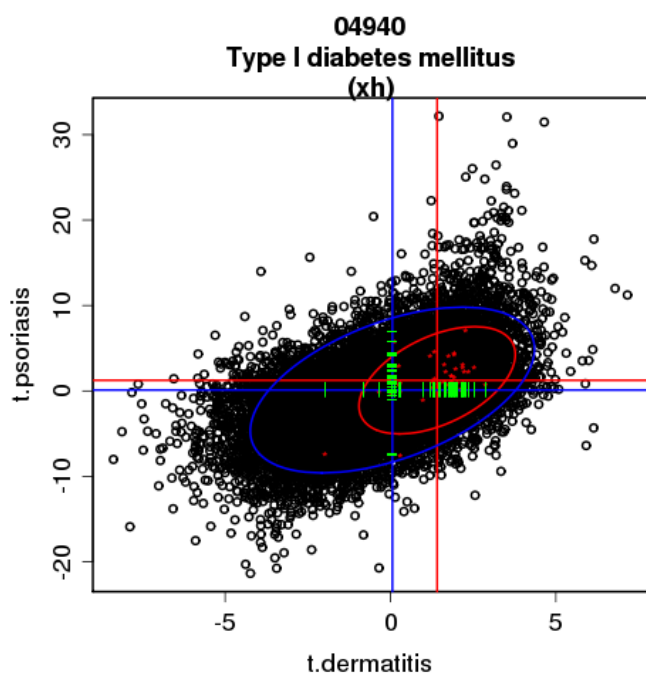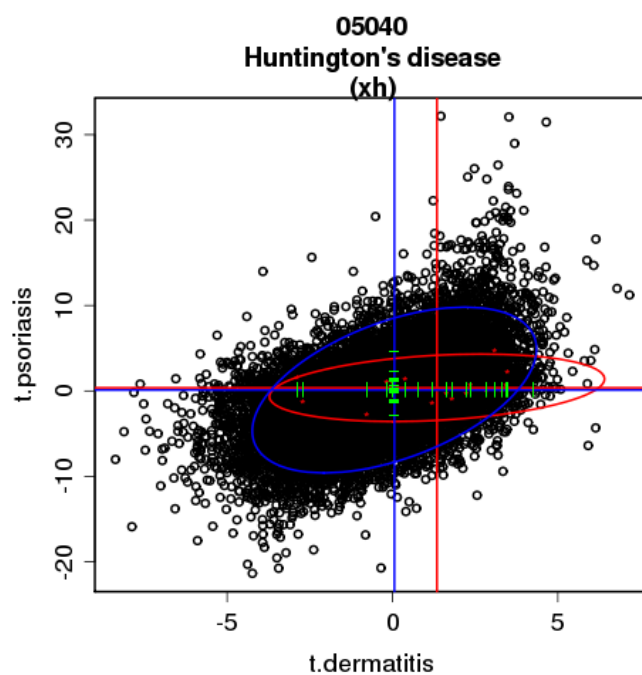

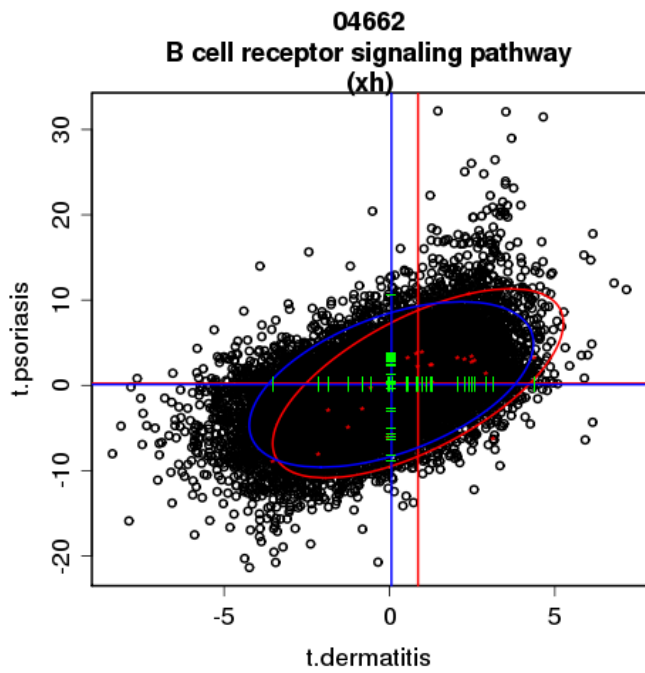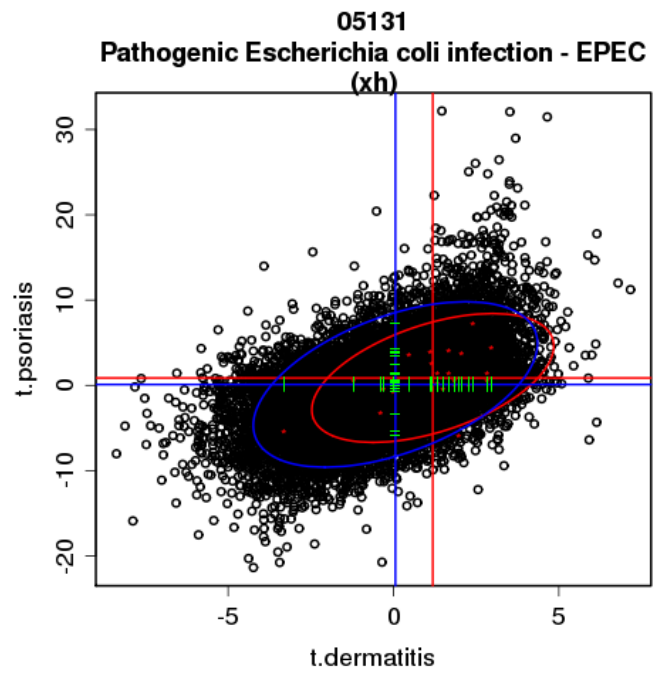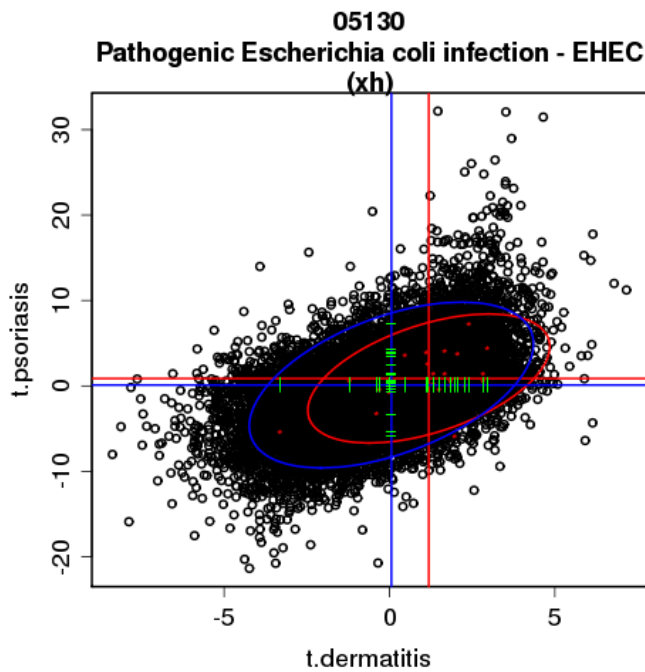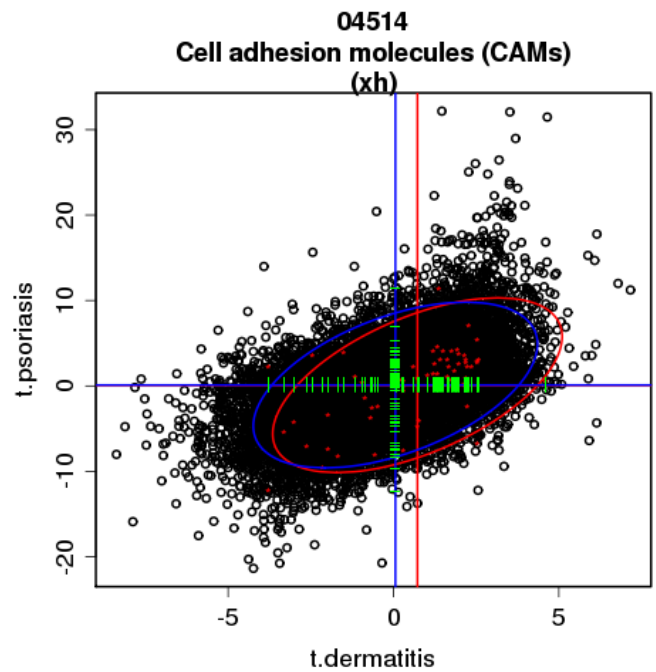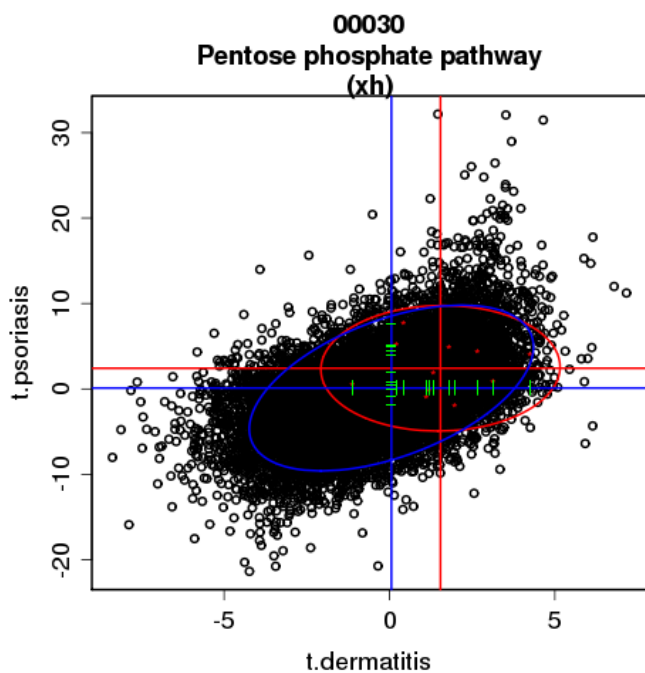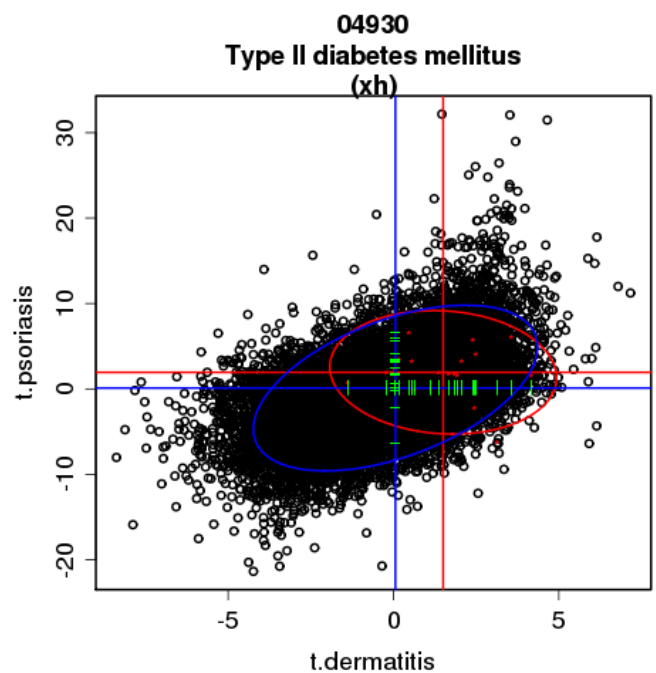

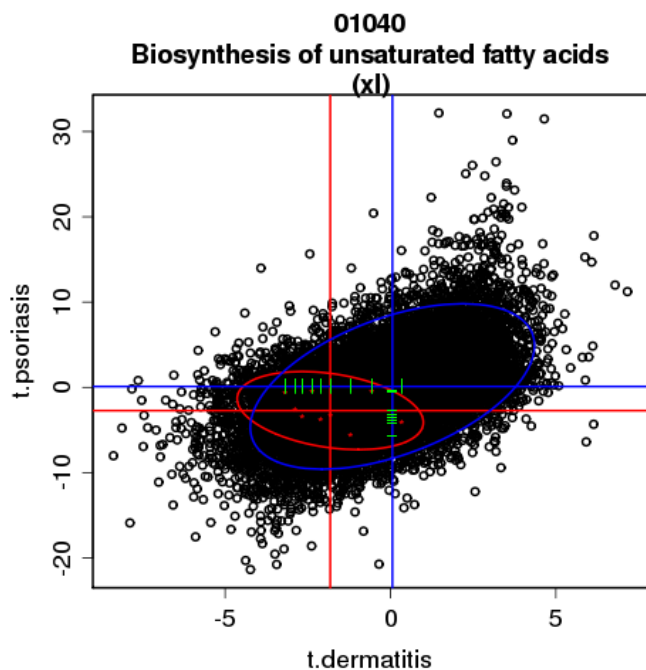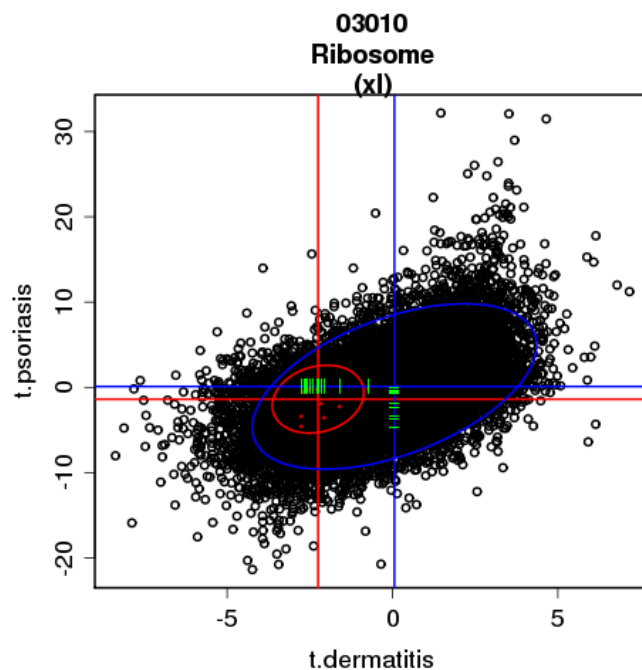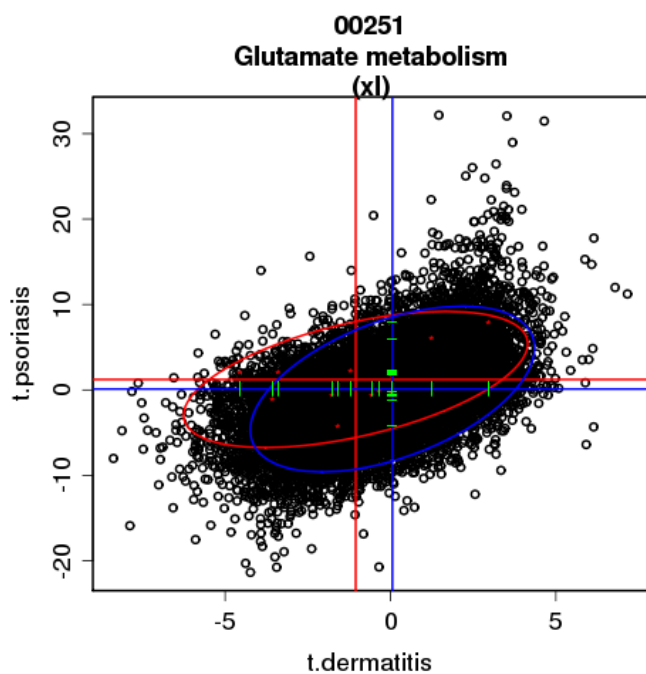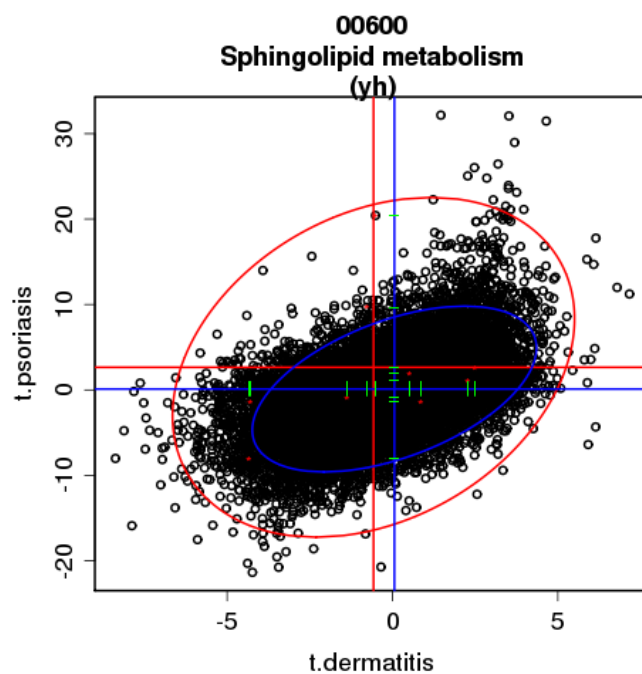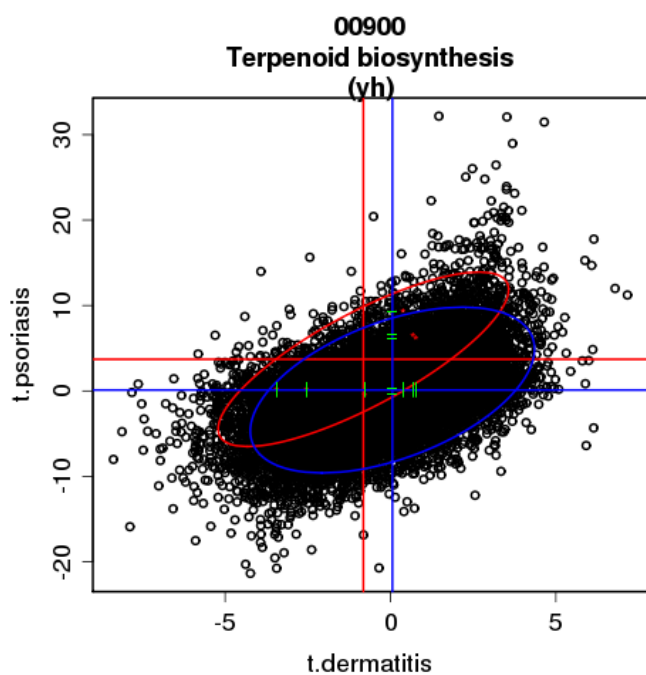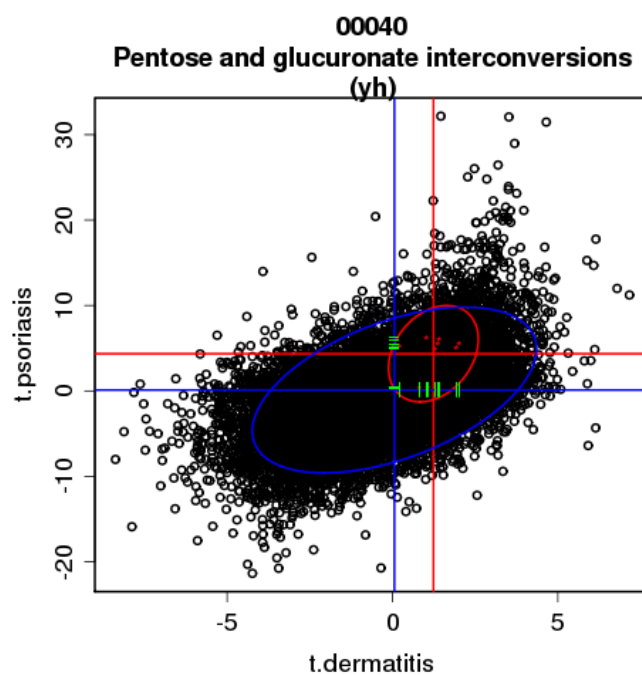

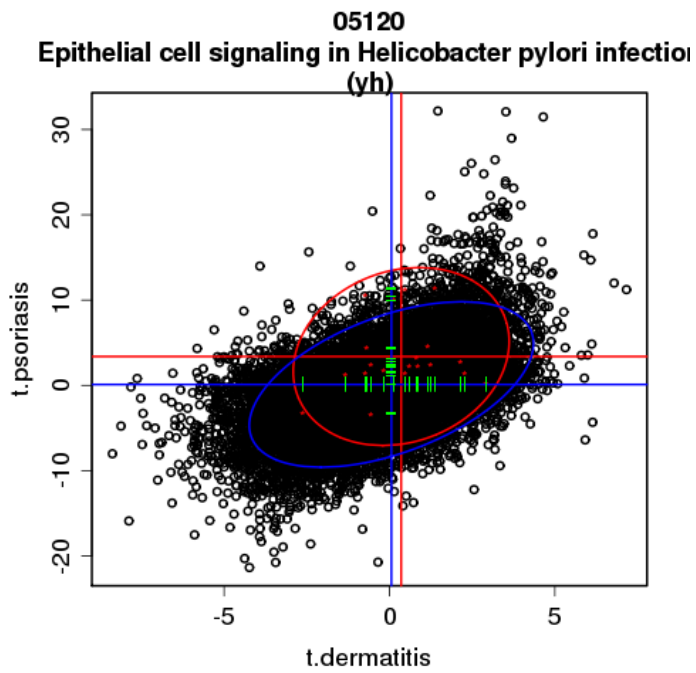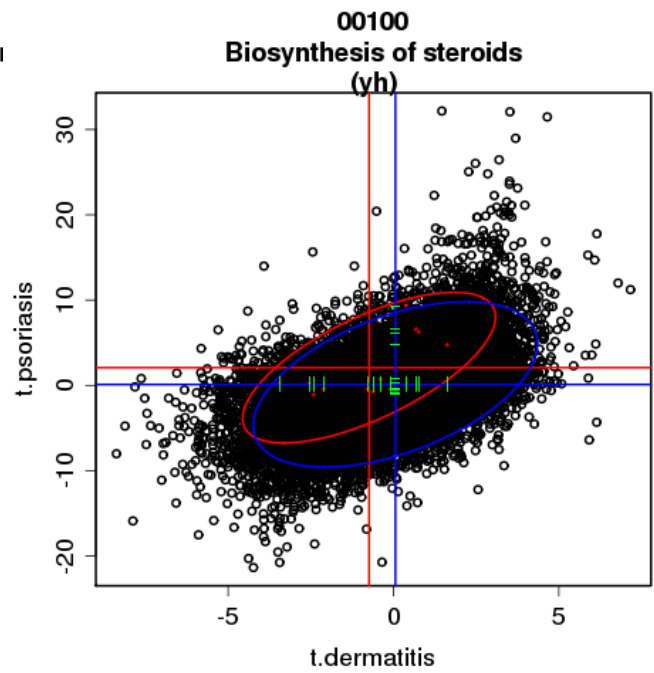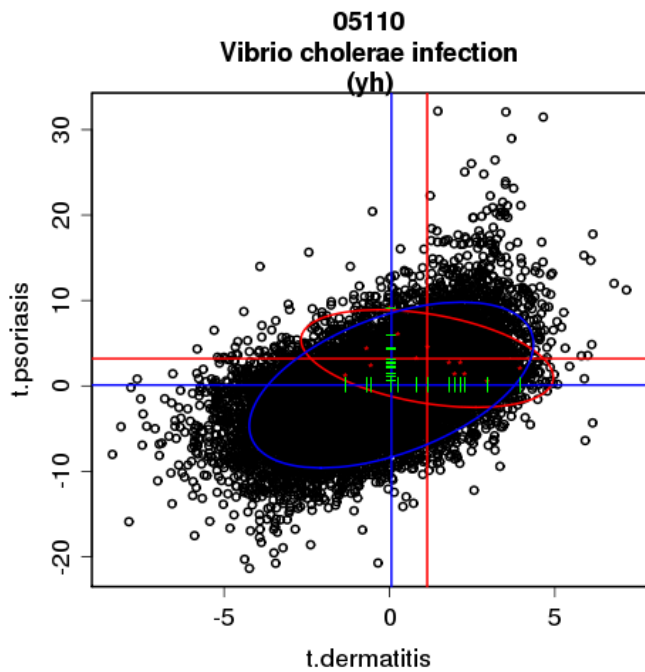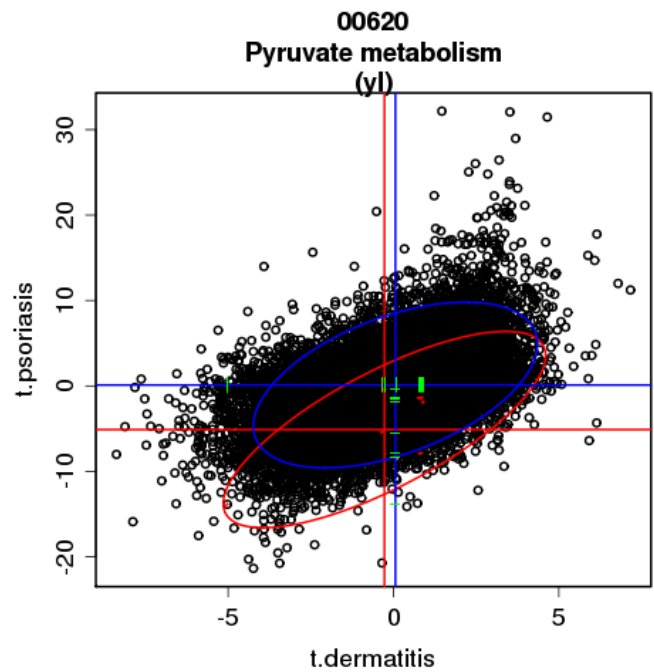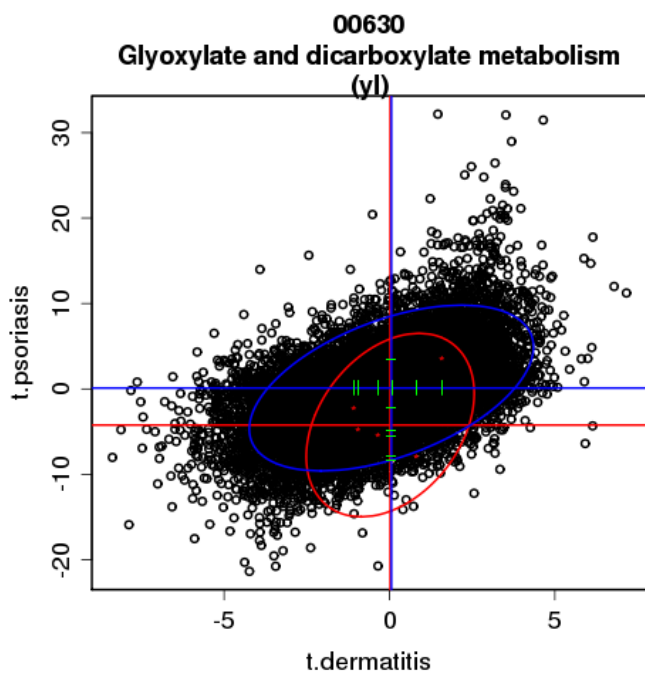

Supplement: S9 (10.1371/journal.pone.0010348.s009) [file journal.pone.0010348.s009]
