# Supplementary material for: Multidimensional Gene Set Analysis of Genomic Data
Source: PubMed Central journal article supplement (PMC2860497; doi:10.1371/journal.pone.0010348), 2010-04-27

# Combined functional profiling of Transcription Rate (TR) and RNA Stability (RS) using GO Biological Process

140 significant modules

LOR indicates Log Odds Ratio of the coefficient or the interaction

p indicates FDR adjusted p-value

|            | LOR TR | LOR RS | LOR In-ter | p TR | p RS | p Inter | pattern | name                                                       |
|------------|--------|--------|------------|------|------|---------|---------|------------------------------------------------------------|
| GO:0022613 | -4.69  | -1.78  | 1.61       | 0.08 | 0.00 | 0.03    | q3i     | ribonucleoprotein complex biogenesis and assembly          |
| GO:0042254 | -5.05  | -1.91  | 1.75       | 0.09 | 0.00 | 0.03    | q3i     | ribosome biogenesis                                        |
| GO:0000746 | -11.48 | -0.73  | 3.17       | 0.06 | 0.02 | 0.03    | q3i     | conjugation                                                |
| GO:0000747 | -11.39 | -0.74  | 3.16       | 0.06 | 0.02 | 0.03    | q3i     | conjugation with cellular fusion                           |
| GO:0019953 | -11.87 | -0.82  | 3.29       | 0.04 | 0.01 | 0.02    | q3i     | sexual reproduction                                        |
| GO:0042221 | -6.65  | -0.12  | 2.05       | 0.02 | 0.60 | 0.01    | q3i     | response to chemical stimulus                              |
| GO:0051704 | -11.98 | -0.69  | 3.23       | 0.04 | 0.02 | 0.02    | q3i     | multi-organism process                                     |
| GO:0000819 | -30.49 | -0.87  | 7.10       | 0.02 | 0.03 | 0.02    | q3i     | sister chromatid segregation                               |
| GO:0000070 | -30.23 | -0.78  | 7.01       | 0.03 | 0.07 | 0.03    | q3i     | mitotic sister chromatid segregation                       |
| GO:0006260 | -20.35 | -0.97  | 4.99       | 0.00 | 0.00 | 0.01    | q3i     | DNA replication                                            |
| GO:0006261 | -25.15 | -1.31  | 6.28       | 0.00 | 0.00 | 0.01    | q3i     | DNA-dependent DNA replication                              |
| GO:0019725 | -9.13  | -0.38  | 2.71       | 0.02 | 0.15 | 0.01    | q3i     | cellular homeostasis                                       |
| GO:0042592 | -8.75  | -0.30  | 2.59       | 0.02 | 0.27 | 0.01    | q3i     | homeostatic process                                        |
| GO:0065004 | 12.12  | -0.49  | -4.60      | 0.00 | 0.21 | 0.02    | q4i     | protein-DNA complex assembly                               |
| GO:0006325 | 8.01   | -0.47  | -3.09      | 0.00 | 0.03 | 0.01    | q4i     | establishment and/or maintenance of chromatin architecture |
| GO:0006323 | 12.63  | -0.48  | -4.96      | 0.00 | 0.15 | 0.01    | q4i     | DNA packaging                                              |
| GO:0006333 | 12.44  | -0.40  | -4.84      | 0.00 | 0.23 | 0.01    | q4i     | chromatin assembly or disassembly                          |
| GO:0031497 | 12.51  | -0.44  | -4.84      | 0.00 | 0.20 | 0.01    | q4i     | chromatin assembly                                         |
| GO:0006082 | 0.58   | 0.56   | -0.18      | 0.99 | 0.00 | 1.00    | yh      | organic acid metabolic process                             |
| GO:0006519 | 2.41   | 0.43   | -0.88      | 0.66 | 0.02 | 0.58    | yh      | amino acid and derivative metabolic process                |
| GO:0006520 | 2.44   | 0.45   | -0.87      | 0.65 | 0.02 | 0.58    | yh      | amino acid metabolic process                               |
| GO:0006807 | 2.56   | 0.44   | -1.01      | 0.61 | 0.01 | 0.46    | yh      | nitrogen compound metabolic process                        |
| GO:0009308 | 2.41   | 0.41   | -0.89      | 0.65 | 0.03 | 0.57    | yh      | amine metabolic process                                    |
| GO:0019752 | 0.58   | 0.56   | -0.18      | 0.99 | 0.00 | 1.00    | yh      | carboxylic acid metabolic process                          |
| GO:0009056 | -0.54  | 0.34   | 0.15       | 0.99 | 0.02 | 1.00    | yh      | catabolic process                                          |
| GO:0044248 | -0.21  | 0.38   | 0.09       | 0.99 | 0.01 | 1.00    | yh      | cellular catabolic process                                 |
| GO:0005975 | -0.32  | 0.87   | 0.01       | 0.99 | 0.00 | 1.00    | yh      | carbohydrate metabolic process                             |
| GO:0005996 | -0.88  | 0.97   | 0.37       | 0.99 | 0.00 | 1.00    | yh      | monosaccharide metabolic process                           |
| GO:0006066 | -0.97  | 0.76   | 0.31       | 0.99 | 0.00 | 1.00    | yh      | alcohol metabolic process                                  |
| GO:0044262 | -0.08  | 0.88   | -0.07      | 1.00 | 0.00 | 1.00    | yh      | cellular carbohydrate metabolic process                    |
| GO:0019318 | -1.03  | 0.93   | 0.43       | 0.99 | 0.00 | 1.00    | yh      | hexose metabolic process                                   |
| GO:0032787 | -1.77  | 0.75   | 0.58       | 0.99 | 0.00 | 1.00    | yh      | monocarboxylic acid metabolic process                      |
| GO:0006006 | -1.37  | 0.95   | 0.61       | 0.99 | 0.00 | 1.00    | yh      | glucose metabolic process                                  |
| GO:0006007 | 0.02   | 1.23   | 0.35       | 1.00 | 0.00 | 1.00    | yh      | glucose catabolic process                                  |
| GO:0016052 | -1.20  | 1.09   | 0.55       | 0.99 | 0.00 | 1.00    | yh      | carbohydrate catabolic process                             |
| GO:0019320 | -0.44  | 1.16   | 0.44       | 0.99 | 0.00 | 1.00    | yh      | hexose catabolic process                                   |
| GO:0044275 | -1.20  | 1.09   | 0.55       | 0.99 | 0.00 | 1.00    | yh      | cellular carbohydrate catabolic process                    |
| GO:0046164 | -0.86  | 1.15   | 0.56       | 0.99 | 0.00 | 1.00    | yh      | alcohol catabolic process                                  |
| GO:0046365 | -0.15  | 1.25   | 0.35       | 0.99 | 0.00 | 1.00    | yh      | monosaccharide catabolic process                           |
| GO:0006090 | -0.15  | 1.15   | 0.45       | 0.99 | 0.01 | 1.00    | yh      | pyruvate metabolic process                                 |
| GO:0006096 | -0.93  | 1.13   | 0.65       | 0.99 | 0.01 | 1.00    | yh      | glycolysis                                                 |
| GO:0009063 | 5.11   | 1.04   | -1.75      | 0.59 | 0.03 | 0.68    | yh      | amino acid catabolic process                               |
| GO:0009310 | 5.53   | 1.09   | -1.99      | 0.56 | 0.02 | 0.61    | yh      | amine catabolic process                                    |
| GO:0044270 | 5.53   | 1.09   | -1.99      | 0.56 | 0.02 | 0.61    | yh      | nitrogen compound catabolic process                        |
| GO:0006084 | 5.12   | 1.35   | -1.65      | 0.46 | 0.00 | 0.52    | yh      | acetyl-CoA metabolic process                               |
| GO:0006732 | 0.20   | 0.63   | -0.10      | 0.99 | 0.01 | 1.00    | yh      | coenzyme metabolic process                                 |
| GO:0051186 | 0.45   | 0.58   | -0.10      | 0.99 | 0.01 | 1.00    | yh      | cofactor metabolic process                                 |
| GO:0006091 | 1.50   | 0.40   | -0.23      | 0.80 | 0.03 | 1.00    | yh      | generation of precursor metabolites and energy             |
| GO:0006113 | 5.76   | 1.41   | -1.76      | 0.46 | 0.01 | 0.61    | yh      | fermentation                                               |
| GO:0015980 | 2.73   | 0.58   | -0.66      | 0.48 | 0.02 | 0.70    | yh      | energy derivation by oxidation of organic compounds        |
| GO:0019751 | 4.35   | 1.38   | -1.11      | 0.66 | 0.02 | 0.92    | yh      | polyol metabolic process                                   |
| GO:0006536 | 3.21   | 1.30   | -0.86      | 0.99 | 0.03 | 1.00    | yh      | glutamate metabolic process                                |
| GO:0009084 | 3.78   | 0.98   | -1.30      | 0.93 | 0.03 | 0.95    | yh      | glutamine family amino acid biosynthetic process           |
| GO:0006537 | 3.28   | 1.37   | -0.87      | 0.99 | 0.03 | 1.00    | yh      | glutamate biosynthetic process                             |
| GO:0006766 | -1.01  | 0.63   | 0.23       | 0.99 | 0.05 | 1.00    | yh      | vitamin metabolic process                                  |
| GO:0006767 | -1.01  | 0.63   | 0.23       | 0.99 | 0.05 | 1.00    | yh      | water-soluble vitamin metabolic process                    |
| GO:0030435 | 4.76   | 0.56   | -1.98      | 0.43 | 0.02 | 0.27    | yh      | sporulation                                                |
| GO:0005984 | -70.69 | 1.26   | 12.40      | 0.49 | 0.05 | 0.61    | yh      | disaccharide metabolic process                             |
| GO:0008645 | -1.41  | 1.40   | 0.02       | 0.99 | 0.02 | 1.00    | yh      | hexose transport                                           |
| GO:0015749 | -1.41  | 1.40   | 0.02       | 0.99 | 0.02 | 1.00    | yh      | monosaccharide transport                                   |
| GO:0006094 | -0.30  | 1.11   | 0.57       | 0.99 | 0.03 | 1.00    | yh      | gluconeogenesis                                            |
| GO:0019319 | -0.14  | 0.98   | 0.50       | 0.99 | 0.05 | 1.00    | yh      | hexose biosynthetic process                                |
| GO:0046165 | 1.85   | 1.14   | -0.05      | 0.99 | 0.01 | 1.00    | yh      | alcohol biosynthetic process                               |
| GO:0046364 | -0.14  | 0.98   | 0.50       | 0.99 | 0.05 | 1.00    | yh      | monosaccharide biosynthetic process                        |
| GO:0006739 | 2.55   | 1.46   | -0.49      | 0.99 | 0.00 | 1.00    | yh      | NADP metabolic process                                     |
| GO:0006740 | 3.11   | 1.61   | -0.58      | 0.95 | 0.00 | 1.00    | yh      | NADPH regeneration                                         |
| GO:0006769 | -0.60  | 0.89   | 0.32       | 0.99 | 0.03 | 1.00    | yh      | nicotinamide metabolic process                             |
| GO:0019362 | -0.83  | 0.86   | 0.37       | 0.99 | 0.03 | 1.00    | yh      | pyridine nucleotide metabolic process                      |
| GO:0006098 | 2.55   | 1.46   | -0.39      | 0.99 | 0.01 | 1.00    | yh      | pentose-phosphate shunt                                    |
| GO:0006067 | 3.53   | 1.79   | -1.08      | 0.99 | 0.00 | 1.00    | yh      | ethanol metabolic process                                  |
| GO:0009072 | 7.43   | 1.06   | -3.32      | 0.79 | 0.02 | 0.62    | yh      | aromatic amino acid family metabolic process               |

|            |        |       |        |      |      |      |    |                                                                                 |
|------------|--------|-------|--------|------|------|------|----|---------------------------------------------------------------------------------|
| GO:0016042 | 18.81  | 1.09  | -10.53 | 0.95 | 0.03 | 0.61 | yh | lipid catabolic process                                                         |
| GO:0009081 | 5.35   | 1.11  | -1.70  | 0.46 | 0.02 | 0.58 | yh | branched chain family amino acid metabolic process                              |
| GO:0006081 | -0.84  | 1.39  | 0.01   | 0.99 | 0.02 | 1.00 | yh | aldehyde metabolic process                                                      |
| GO:0009109 | 4.88   | 1.30  | -1.52  | 0.49 | 0.00 | 0.58 | yh | coenzyme catabolic process                                                      |
| GO:0046356 | 4.97   | 1.35  | -1.52  | 0.47 | 0.00 | 0.57 | yh | acetyl-CoA catabolic process                                                    |
| GO:0051187 | 4.77   | 1.40  | -1.46  | 0.49 | 0.00 | 0.59 | yh | cofactor catabolic process                                                      |
| GO:0006100 | 5.29   | 1.19  | -1.58  | 0.46 | 0.02 | 0.61 | yh |                                                                                 |
| GO:0006099 | 4.97   | 1.35  | -1.52  | 0.47 | 0.00 | 0.57 | yh | tricarboxylic acid cycle                                                        |
| GO:0006071 | 4.12   | 1.26  | -1.02  | 0.73 | 0.04 | 0.95 | yh | glycerol metabolic process                                                      |
| GO:0044242 | 19.65  | 1.51  | -9.69  | 0.56 | 0.00 | 0.43 | yh | cellular lipid catabolic process                                                |
| GO:0022607 | 3.20   | -0.68 | -1.01  | 0.17 | 0.00 | 0.29 | yl | cellular component assembly                                                     |
| GO:0065003 | 2.62   | -0.90 | -0.67  | 0.42 | 0.00 | 0.64 | yl | macromolecular complex assembly                                                 |
| GO:0006366 | 0.16   | -0.63 | -0.37  | 0.99 | 0.00 | 1.00 | yl | transcription from RNA polymerase II promoter                                   |
| GO:0006357 | -0.32  | -0.60 | -0.35  | 0.99 | 0.02 | 1.00 | yl | regulation of transcription from RNA polymerase II promoter                     |
| GO:0016568 | 2.18   | -0.64 | -1.61  | 0.99 | 0.01 | 0.84 | yl | chromatin modification                                                          |
| GO:0009059 | 0.66   | -0.49 | 0.26   | 0.99 | 0.00 | 0.95 | yl | macromolecule biosynthetic process                                              |
| GO:0000278 | -6.84  | -0.75 | 1.60   | 0.38 | 0.00 | 0.53 | yl | mitotic cell cycle                                                              |
| GO:0051726 | -7.52  | -0.93 | 1.68   | 0.70 | 0.00 | 0.95 | yl | regulation of cell cycle                                                        |
| GO:0006396 | -5.40  | -1.47 | 1.41   | 0.35 | 0.00 | 0.46 | yl | RNA processing                                                                  |
| GO:0008033 | -0.88  | -0.92 | 0.12   | 0.99 | 0.01 | 1.00 | yl | tRNA processing                                                                 |
| GO:0009451 | -1.42  | -1.49 | -0.41  | 0.99 | 0.00 | 1.00 | yl | RNA modification                                                                |
| GO:0006400 | -5.93  | -1.22 | 1.21   | 0.99 | 0.03 | 1.00 | yl | tRNA modification                                                               |
| GO:0006401 | -0.39  | -1.02 | 0.04   | 0.99 | 0.02 | 1.00 | yl | RNA catabolic process                                                           |
| GO:0006402 | 0.04   | -1.00 | -0.01  | 1.00 | 0.03 | 1.00 | yl | mRNA catabolic process                                                          |
| GO:0016071 | -2.19  | -0.78 | 0.58   | 0.99 | 0.00 | 1.00 | yl | mRNA metabolic process                                                          |
| GO:0006397 | -3.22  | -0.82 | 0.90   | 0.93 | 0.00 | 0.95 | yl | mRNA processing                                                                 |
| GO:0051325 | -4.72  | -0.88 | 1.03   | 0.97 | 0.02 | 1.00 | yl | interphase                                                                      |
| GO:0051329 | -4.72  | -0.88 | 1.03   | 0.97 | 0.02 | 1.00 | yl | interphase of mitotic cell cycle                                                |
| GO:0006486 | -7.70  | -0.93 | 1.80   | 0.79 | 0.02 | 0.95 | yl | protein amino acid glycosylation                                                |
| GO:0009100 | -2.61  | -0.87 | 0.54   | 0.99 | 0.02 | 1.00 | yl | glycoprotein metabolic process                                                  |
| GO:0009101 | -2.70  | -0.90 | 0.59   | 0.99 | 0.02 | 1.00 | yl | glycoprotein biosynthetic process                                               |
| GO:0043413 | -7.70  | -0.93 | 1.80   | 0.79 | 0.02 | 0.95 | yl | biopolymer glycosylation                                                        |
| GO:0000087 | -9.82  | -0.87 | 2.40   | 0.28 | 0.00 | 0.39 | yl | M phase of mitotic cell cycle                                                   |
| GO:0007067 | -9.74  | -0.88 | 2.33   | 0.35 | 0.00 | 0.46 | yl | mitosis                                                                         |
| GO:0007088 | -15.73 | -1.30 | 3.79   | 0.58 | 0.02 | 0.74 | yl | regulation of mitosis                                                           |
| GO:0016072 | -5.48  | -1.90 | 1.37   | 0.72 | 0.00 | 0.95 | yl | rRNA metabolic process                                                          |
| GO:0006364 | -5.46  | -1.96 | 1.41   | 0.70 | 0.00 | 0.94 | yl | rRNA processing                                                                 |
| GO:0022618 | -2.58  | -1.46 | 1.13   | 0.70 | 0.00 | 0.39 | yl | ribonucleoprotein complex assembly                                              |
| GO:0006413 | -2.22  | -1.47 | 0.97   | 0.99 | 0.00 | 0.95 | yl | translational initiation                                                        |
| GO:0007166 | -5.86  | -0.98 | 1.86   | 0.72 | 0.04 | 0.61 | yl | cell surface receptor linked signal transduction                                |
| GO:0031137 | -7.32  | -1.61 | 2.54   | 0.58 | 0.02 | 0.39 | yl | regulation of conjugation with cellular fusion                                  |
| GO:0032005 | -7.32  | -1.61 | 2.54   | 0.58 | 0.02 | 0.39 | yl | signal transduction during conjugation with cellular fusion                     |
| GO:0046999 | -7.32  | -1.61 | 2.54   | 0.58 | 0.02 | 0.39 | yl | regulation of conjugation                                                       |
| GO:0000750 | -7.32  | -1.61 | 2.54   | 0.58 | 0.02 | 0.39 | yl | pheromone-dependent signal transduction during conjugation with cellular fusion |
| GO:0006730 | -5.70  | -0.86 | 1.50   | 0.93 | 0.04 | 0.95 | yl | one-carbon compound metabolic process                                           |
| GO:0000054 | -6.34  | -1.35 | 1.94   | 0.95 | 0.05 | 0.95 | yl | ribosome export from nucleus                                                    |
| GO:0033750 | -6.34  | -1.35 | 1.94   | 0.95 | 0.05 | 0.95 | yl | ribosome localization                                                           |
| GO:0033753 | -6.34  | -1.35 | 1.94   | 0.95 | 0.05 | 0.95 | yl | establishment of ribosome localization                                          |
| GO:0006487 | -8.84  | -1.01 | 2.34   | 0.70 | 0.03 | 0.74 | yl | protein amino acid N-linked glycosylation                                       |
| GO:0032259 | 0.54   | -1.21 | -1.23  | 0.99 | 0.03 | 1.00 | yl | methylation                                                                     |
| GO:0043414 | 0.54   | -1.21 | -1.23  | 0.99 | 0.03 | 1.00 | yl | biopolymer methylation                                                          |
| GO:0006338 | 1.03   | -0.84 | -1.39  | 0.99 | 0.01 | 1.00 | yl | chromatin remodeling                                                            |
| GO:0040029 | 0.26   | -0.88 | -0.80  | 0.99 | 0.02 | 1.00 | yl | regulation of gene expression, epigenetic                                       |
| GO:0048519 | -0.07  | -0.52 | -0.42  | 1.00 | 0.04 | 1.00 | yl | negative regulation of biological process                                       |
| GO:0048523 | -0.18  | -0.51 | -0.39  | 0.99 | 0.04 | 1.00 | yl | negative regulation of cellular process                                         |
| GO:0006497 | -14.22 | -1.02 | 3.75   | 0.39 | 0.03 | 0.31 | yl | protein amino acid lipidation                                                   |
| GO:0042157 | -14.22 | -1.02 | 3.75   | 0.39 | 0.03 | 0.31 | yl | lipoprotein metabolic process                                                   |
| GO:0042158 | -14.22 | -1.02 | 3.75   | 0.39 | 0.03 | 0.31 | yl | lipoprotein biosynthetic process                                                |
| GO:0042255 | -2.49  | -1.80 | 1.31   | 0.82 | 0.00 | 0.39 | yl | ribosome assembly                                                               |
| GO:0042257 | -2.11  | -1.73 | 1.25   | 0.93 | 0.00 | 0.39 | yl | ribosomal subunit assembly                                                      |
| GO:0007062 | -35.59 | -1.24 | 7.67   | 0.46 | 0.04 | 0.58 | yl | sister chromatid cohesion                                                       |
| GO:0042273 | -4.79  | -2.86 | 2.04   | 0.47 | 0.00 | 0.14 | yl | ribosomal large subunit biogenesis                                              |
| GO:0007064 | -65.49 | -1.42 | 14.17  | 0.19 | 0.03 | 0.18 | yl | mitotic sister chromatid cohesion                                               |
| GO:0050793 | -15.23 | -1.52 | 4.16   | 0.58 | 0.03 | 0.52 | yl | regulation of developmental process                                             |
| GO:0000154 | 16.04  | -2.21 | -8.62  | 0.95 | 0.02 | 0.95 | yl | rRNA modification                                                               |
| GO:0030490 | -12.30 | -2.32 | 3.36   | 0.56 | 0.00 | 0.62 | yl | maturation of SSU-rRNA                                                          |
| GO:0000027 | -3.09  | -2.38 | 1.60   | 0.79 | 0.00 | 0.38 | yl | ribosomal large subunit assembly and maintenance                                |
| GO:0043681 | 0.46   | -1.40 | 0.21   | 0.99 | 0.02 | 1.00 | yl | protein import into mitochondrion                                               |
| GO:0000114 | -5.92  | -2.25 | 1.88   | 0.99 | 0.02 | 1.00 | yl | G1-specific transcription in mitotic cell cycle                                 |

Table 1: LOR: log odds ratio; p: adjusted p-value FDR

**GO:0022613**  
ribonucleoprotein complex biogenesis and assembly  
(q3i)

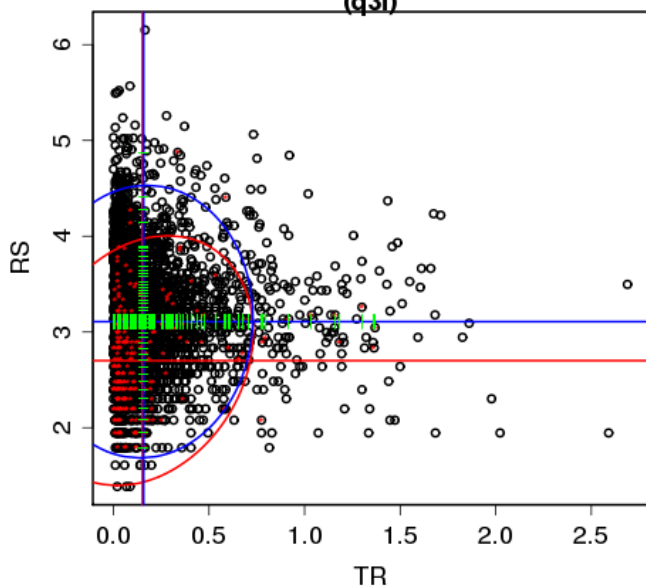

**GO:0042254**  
ribosome biogenesis  
(q3i)

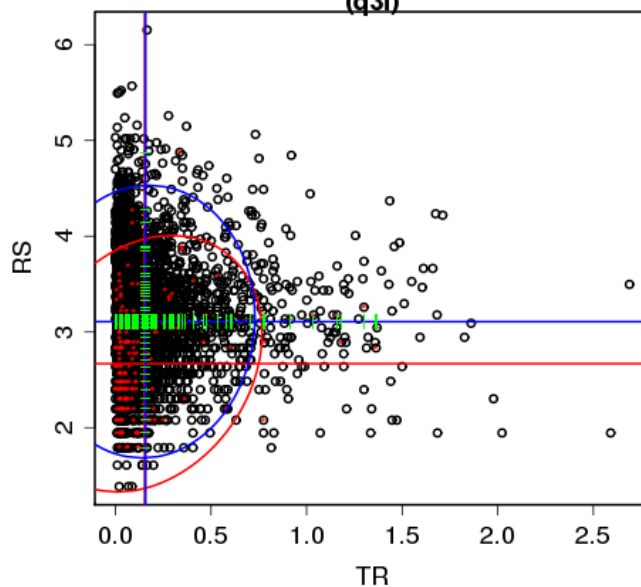

**GO:0000746**  
conjugation  
(q3i)

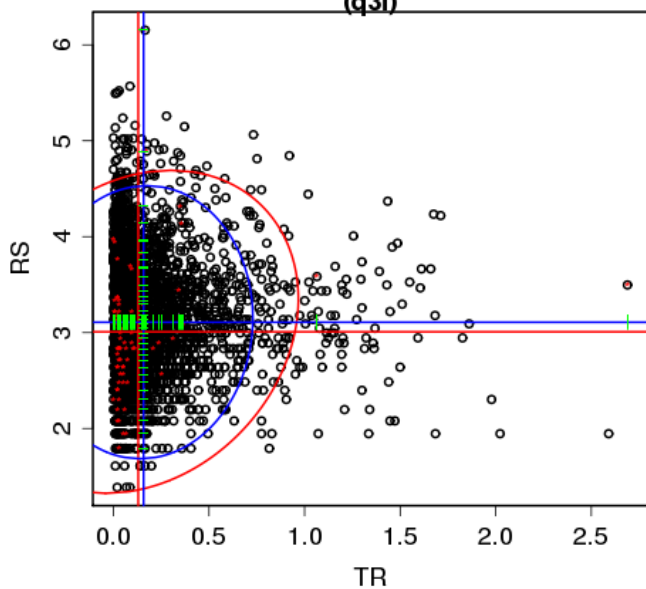

**GO:0000747**  
conjugation with cellular fusion  
(q3i)

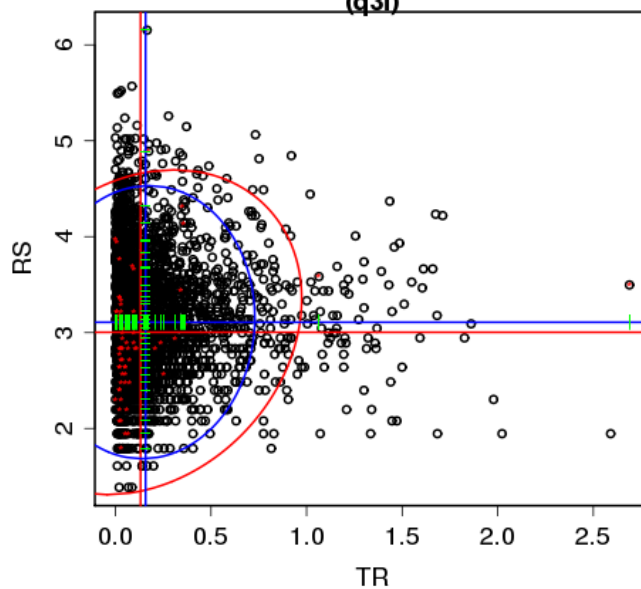

**GO:0019953**  
sexual reproduction  
(q3i)

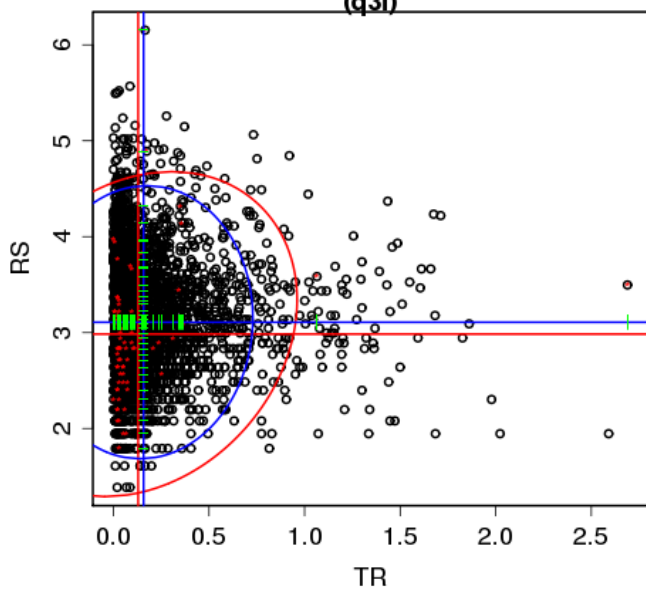

**GO:0042221**  
response to chemical stimulus  
(q3i)

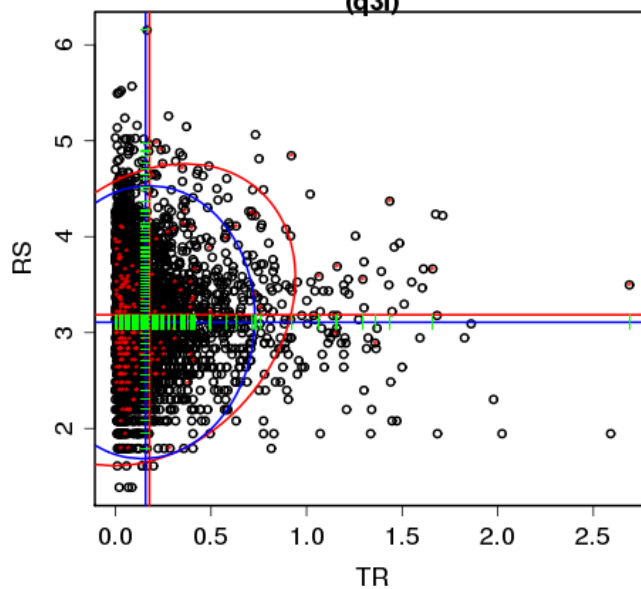

**GO:0051704**  
**multi-organism process**  
**(q3i)**

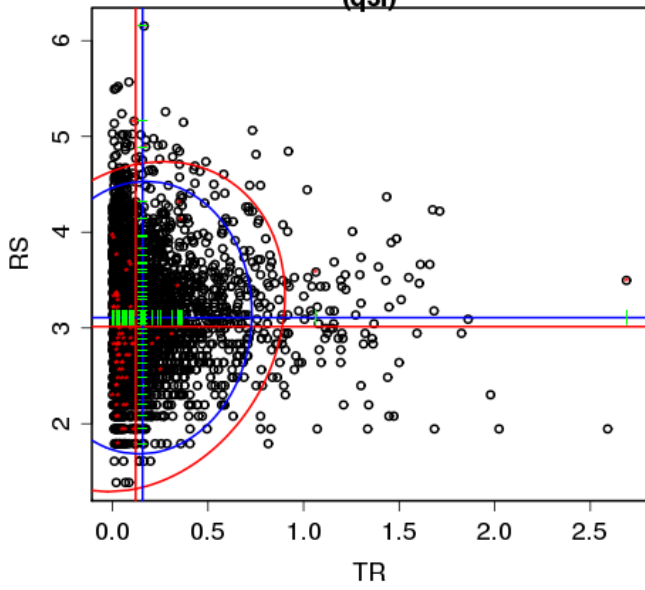

**GO:0000819**  
**sister chromatid segregation**  
**(q3i)**

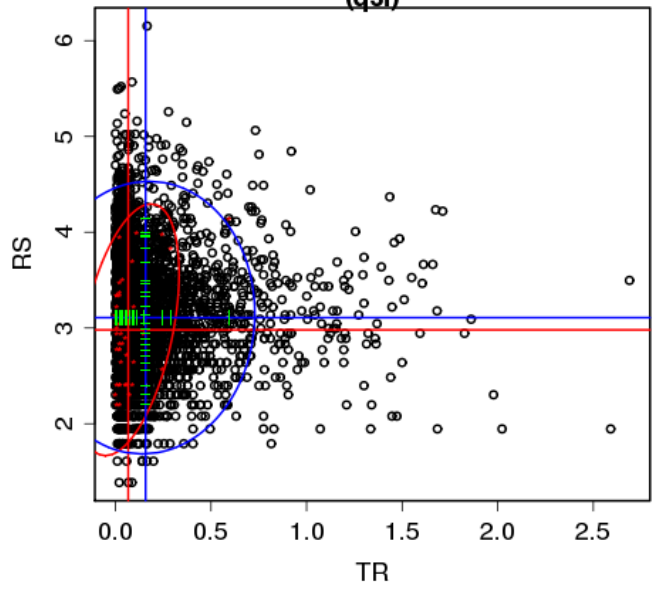

**GO:0000070**  
**mitotic sister chromatid segregation**  
**(q3i)**

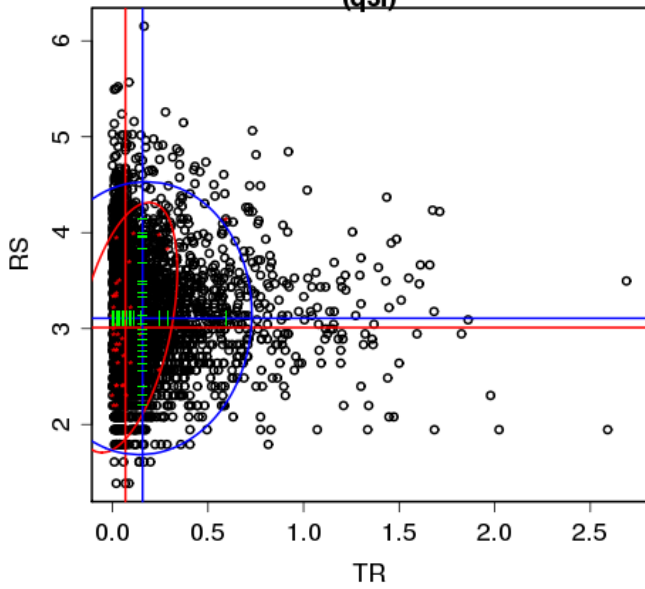

**GO:0006260**  
**DNA replication**  
**(q3i)**

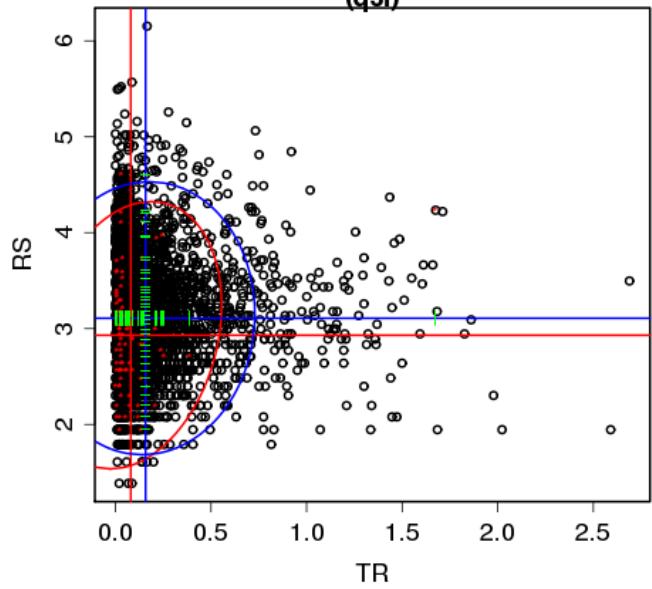

**GO:0006261**  
**DNA-dependent DNA replication**  
**(q3i)**

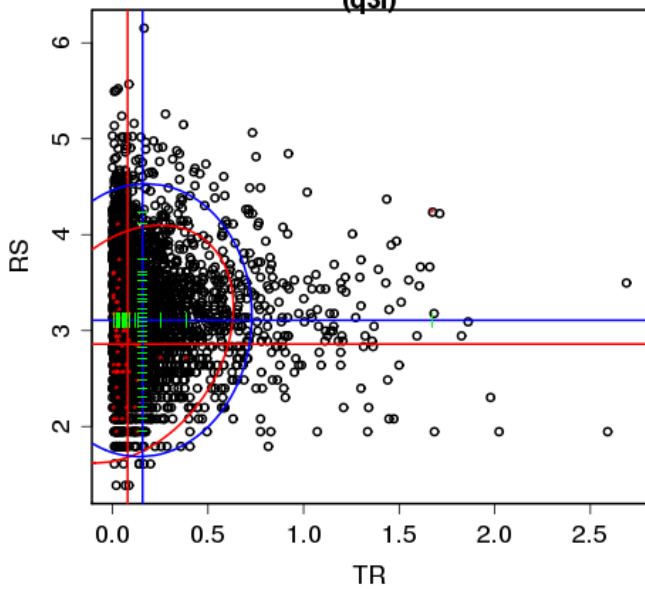

**GO:0019725**  
**cellular homeostasis**  
**(q3i)**

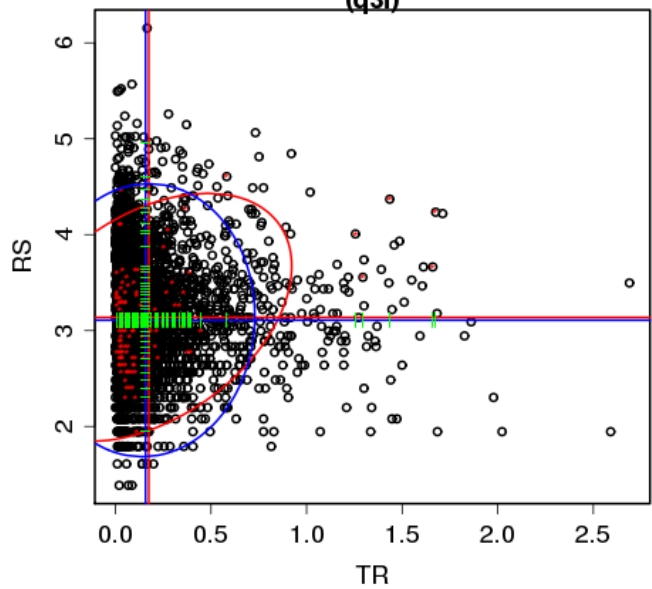



**GO:0042592**  
**homeostatic process**  
**(q3i)**

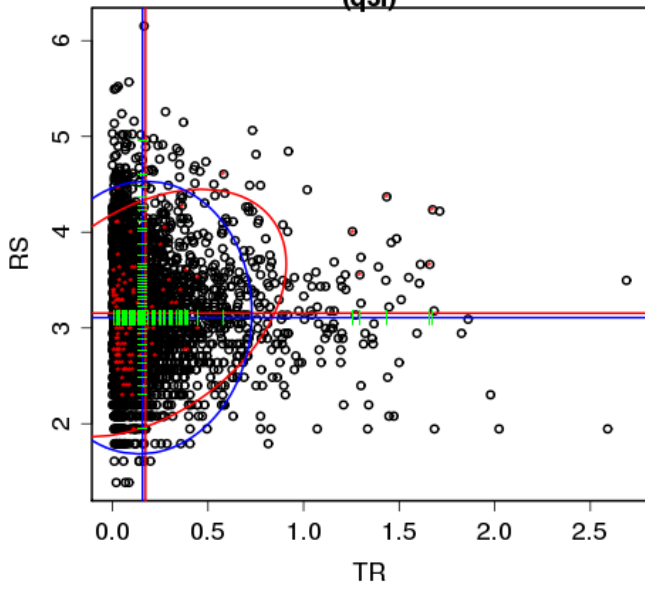

**GO:0065004**  
**protein-DNA complex assembly**  
**(q4i)**

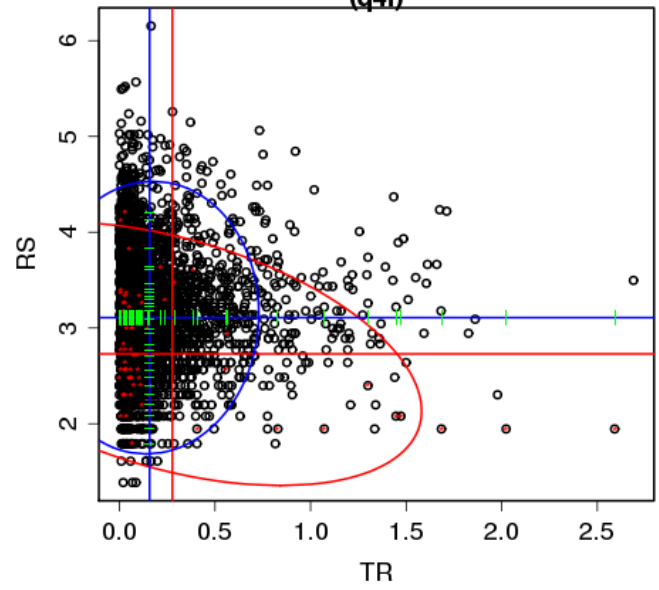

**GO:0006325**  
**establishment and/or maintenance of chromatin architecture**  
**(q4i)**

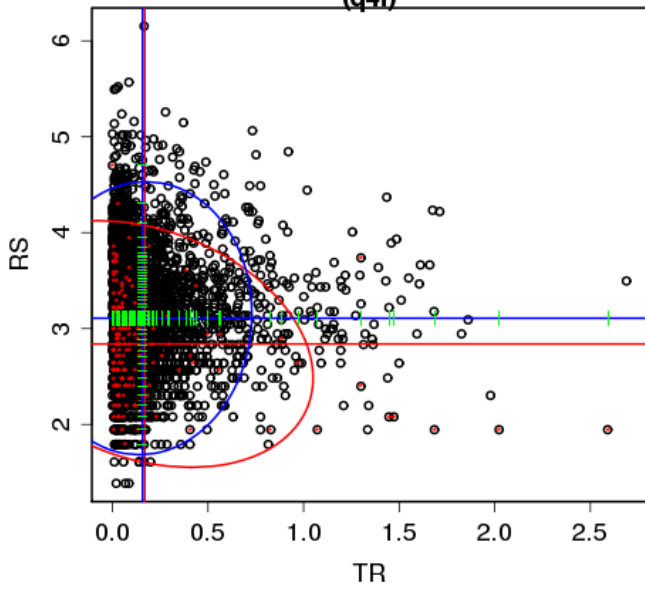

**GO:0006323**  
**DNA packaging**  
**(q4i)**

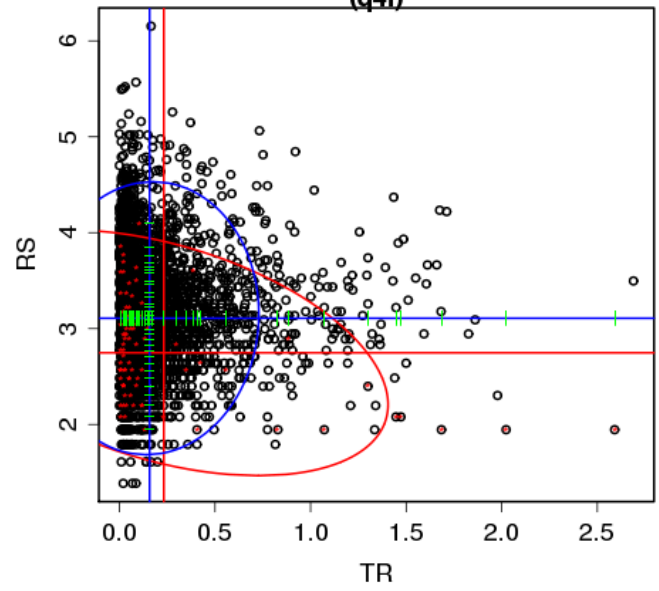

**GO:0006333**  
**chromatin assembly or disassembly**  
**(q4i)**

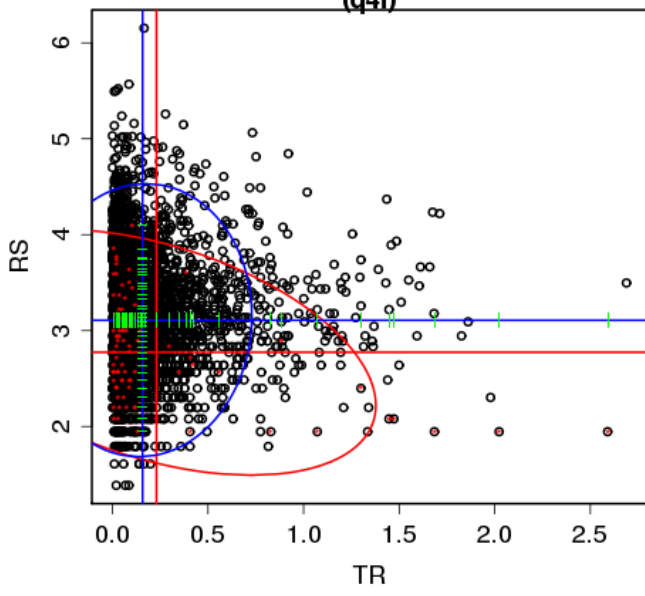

**GO:0031497**  
**chromatin assembly**  
**(q4i)**

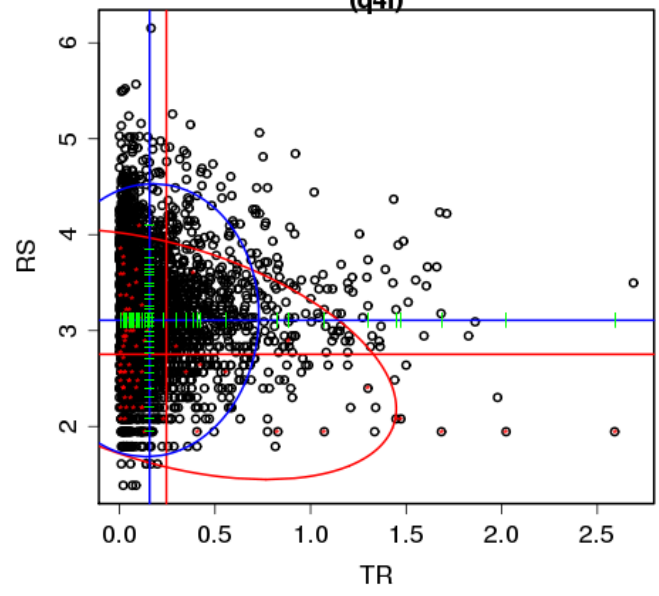

**GO:0006082**  
organic acid metabolic process  
(yh)

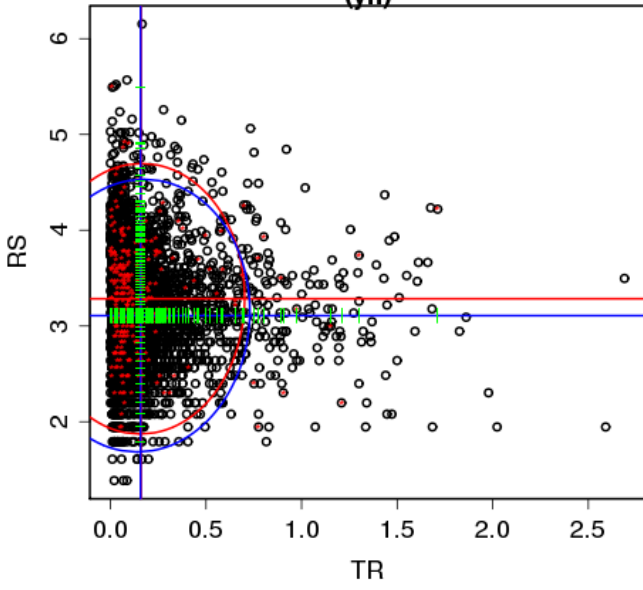

**GO:0006519**  
amino acid and derivative metabolic process  
(yh)

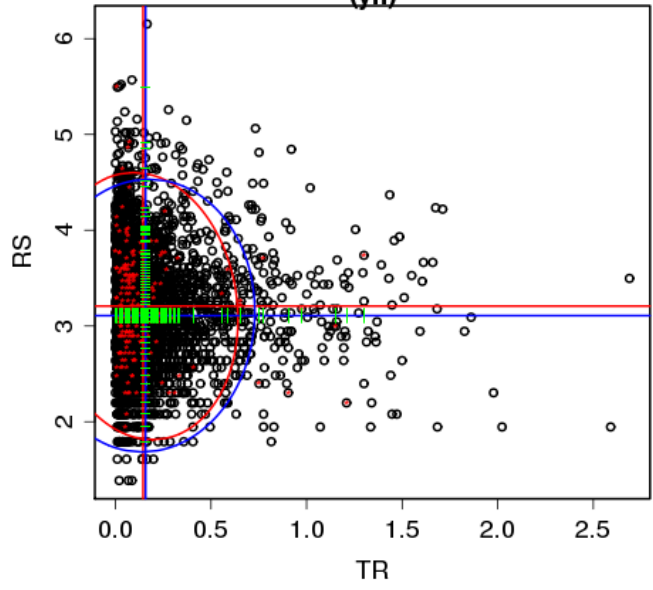

**GO:0006520**  
amino acid metabolic process  
(yh)

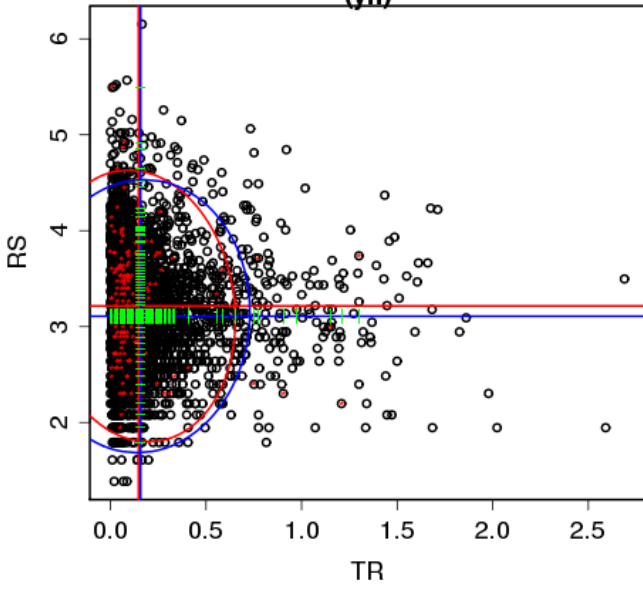

**GO:0006807**  
nitrogen compound metabolic process  
(yh)

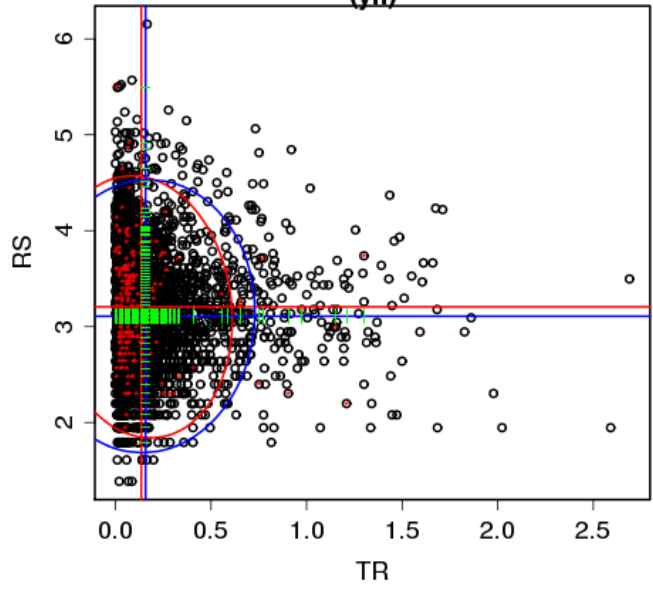

**GO:0009308**  
amine metabolic process  
(yh)

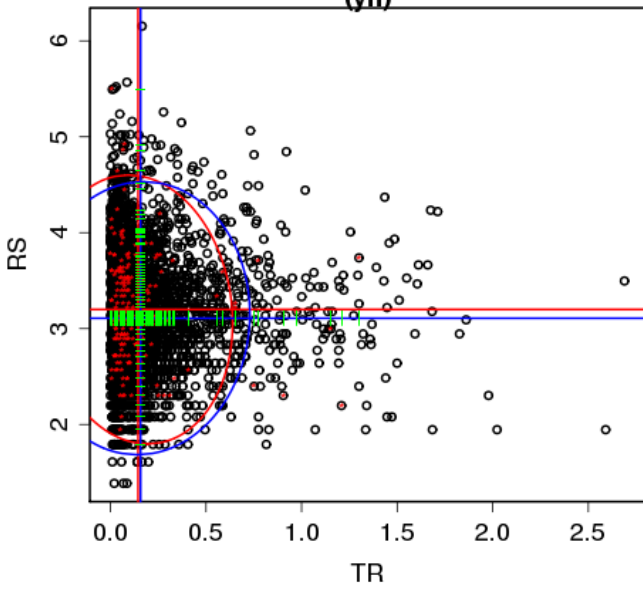

**GO:0019752**  
carboxylic acid metabolic process  
(yh)

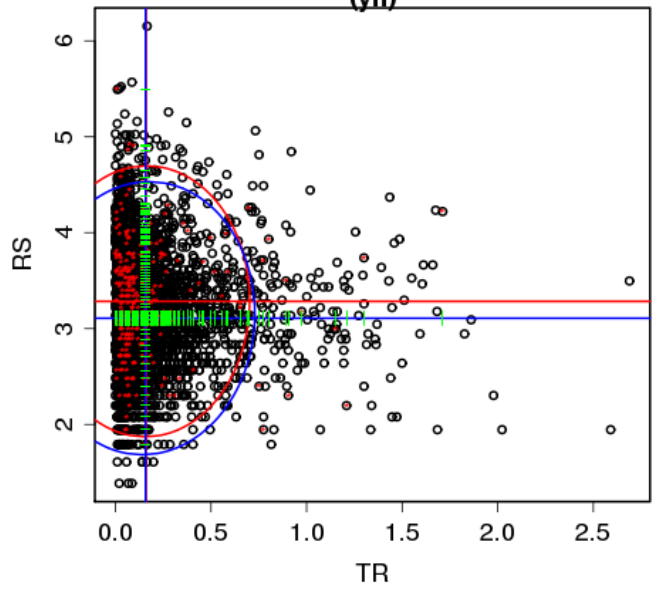

**GO:0009056**  
**catabolic process**  
**(yh)**

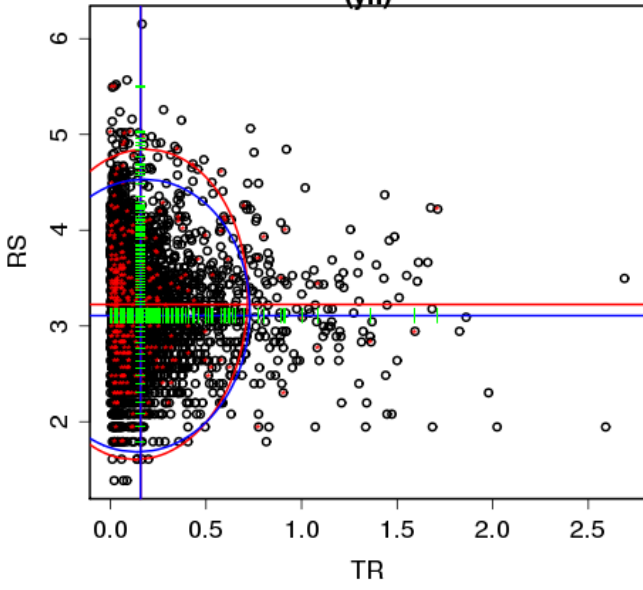

**GO:0044248**  
**cellular catabolic process**  
**(yh)**

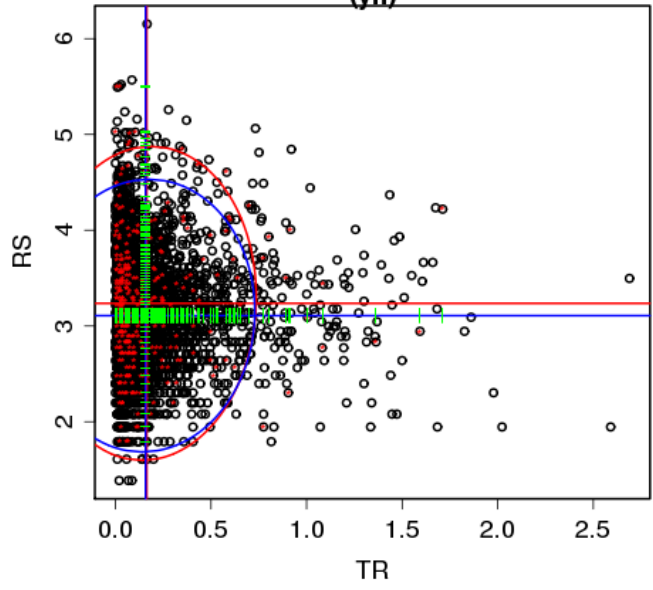

**GO:0005975**  
**carbohydrate metabolic process**  
**(yh)**

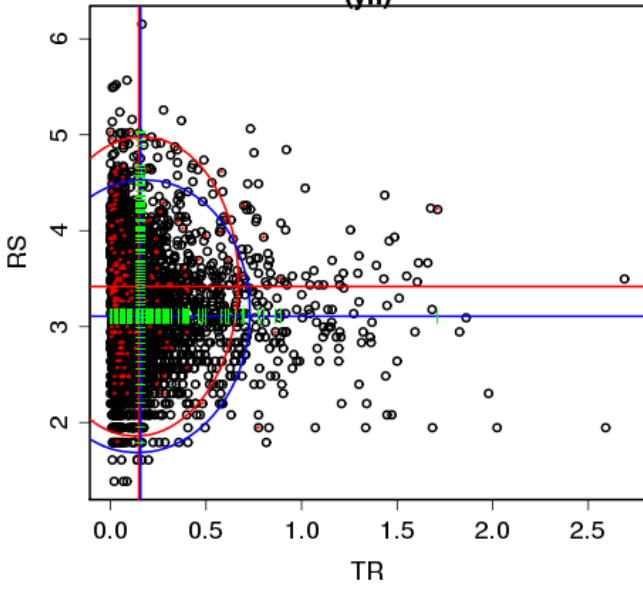

**GO:0005996**  
**monosaccharide metabolic process**  
**(yh)**

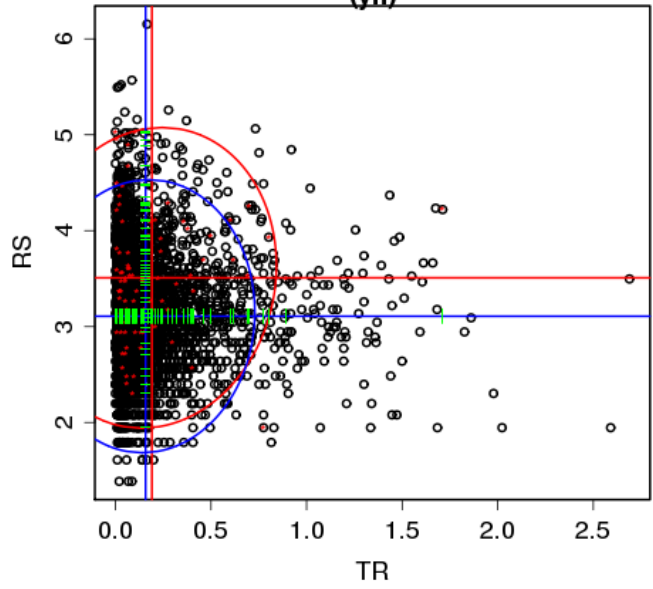

**GO:0006066**  
**alcohol metabolic process**  
**(yh)**

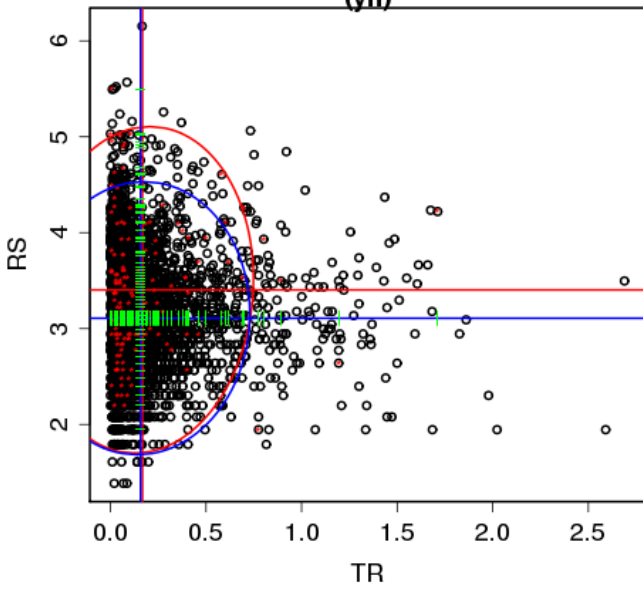

**GO:0044262**  
**cellular carbohydrate metabolic process**  
**(yh)**

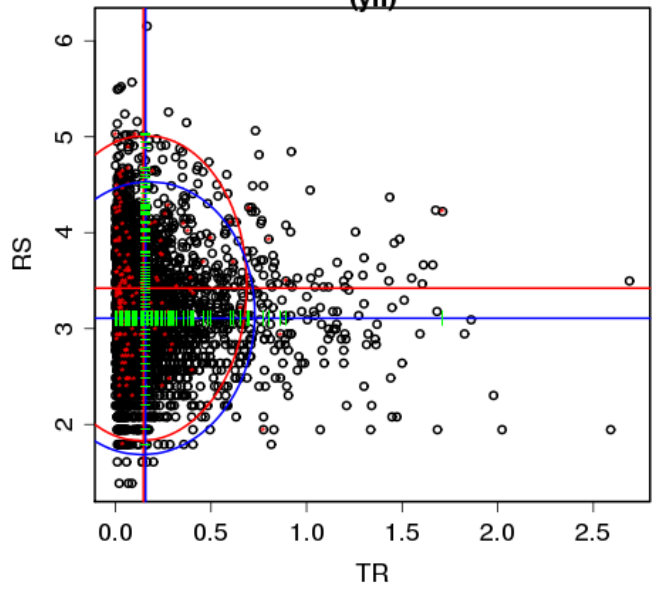

**GO:0019318**  
**hexose metabolic process**  
**(yh)**

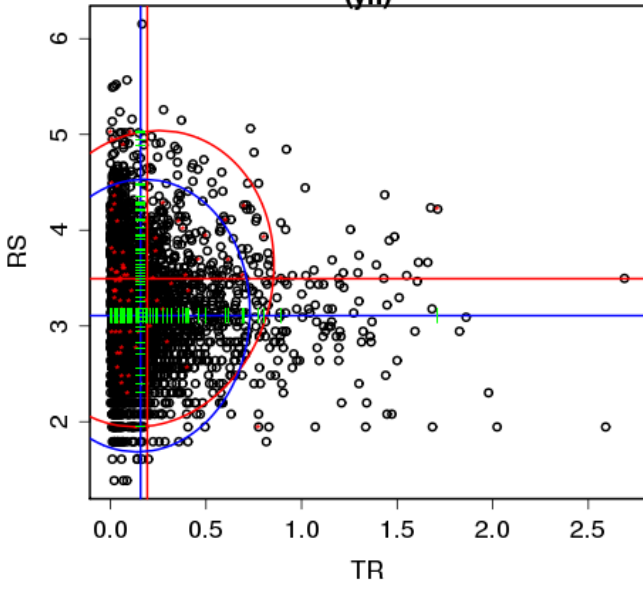

**GO:0032787**  
**monocarboxylic acid metabolic process**  
**(yh)**

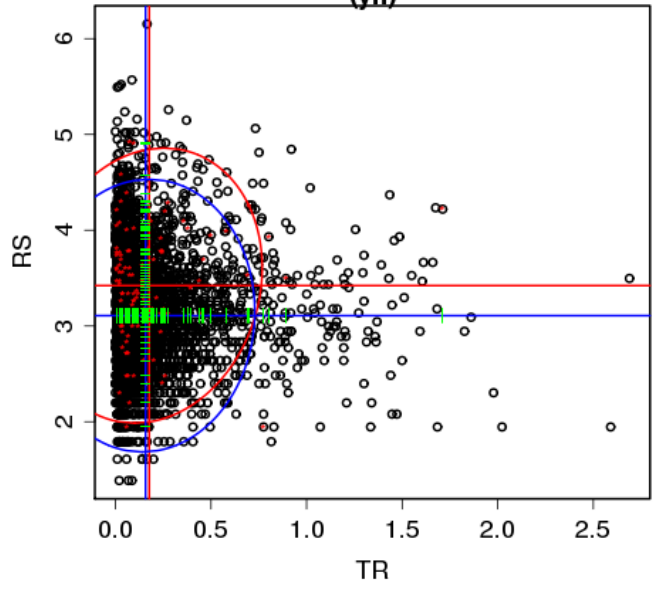

**GO:0006006**  
**glucose metabolic process**  
**(yh)**

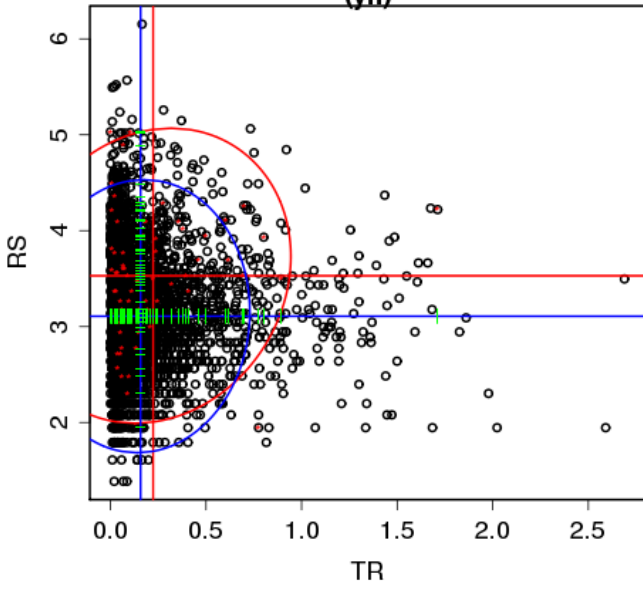

**GO:0006007**  
**glucose catabolic process**  
**(yh)**

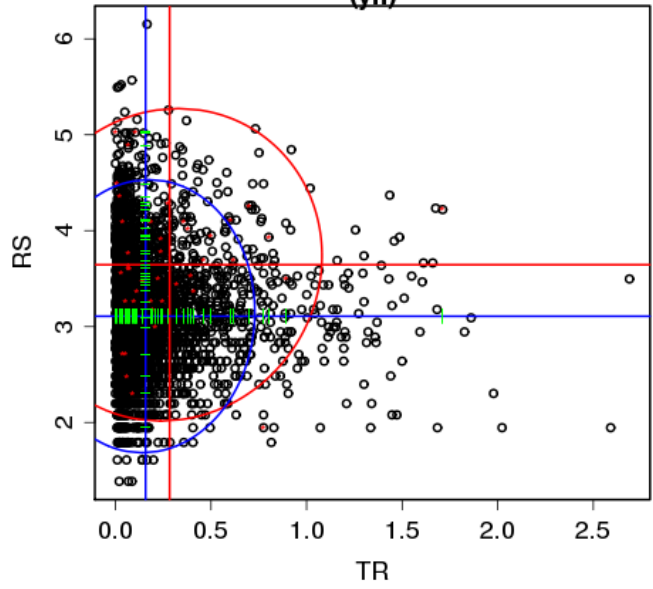

**GO:0016052**  
**carbohydrate catabolic process**  
**(yh)**

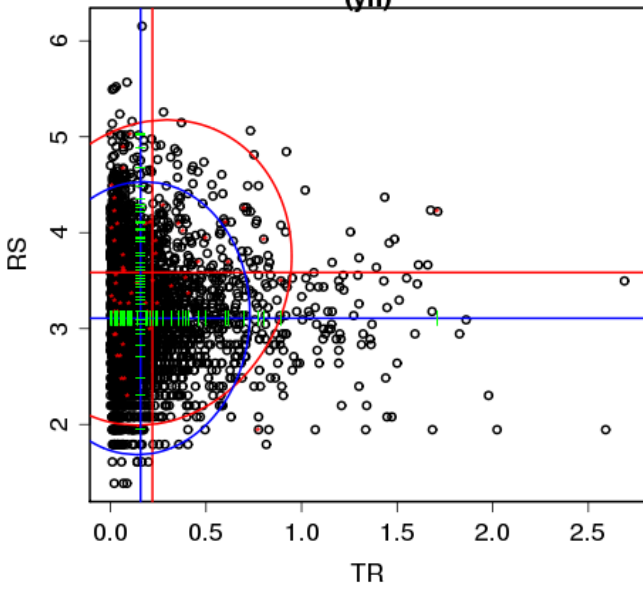

**GO:0019320**  
**hexose catabolic process**  
**(yh)**

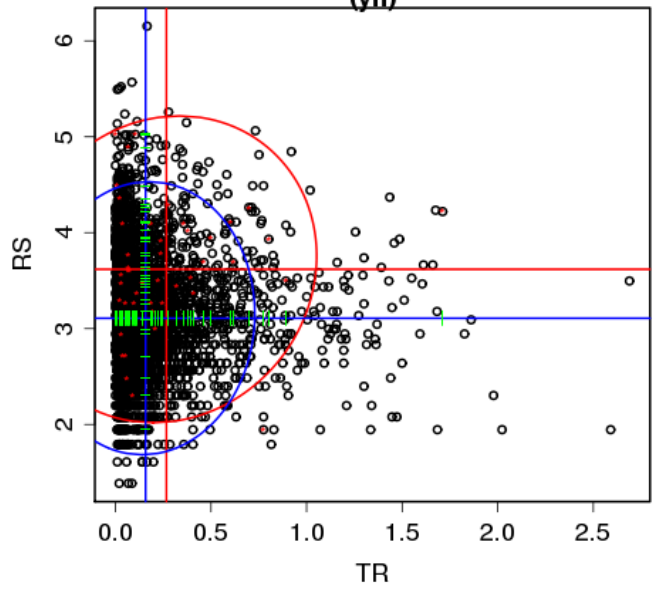

**GO:0044275**  
**cellular carbohydrate catabolic process**  
**(yh)**

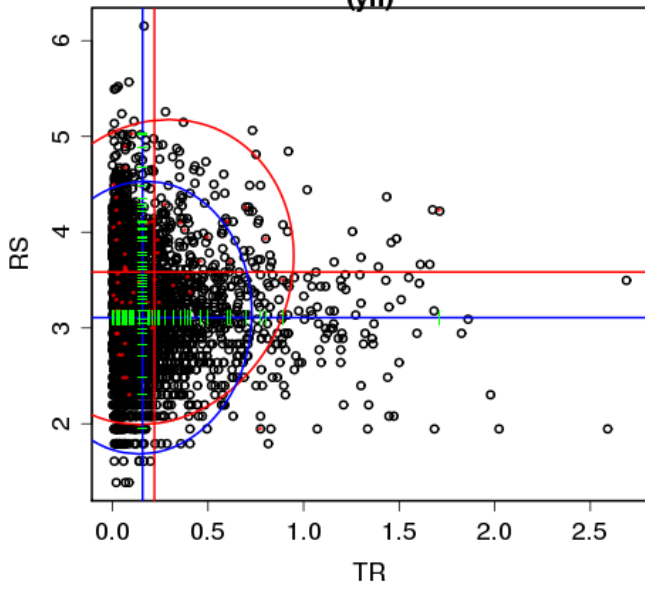

**GO:0046164**  
**alcohol catabolic process**  
**(yh)**

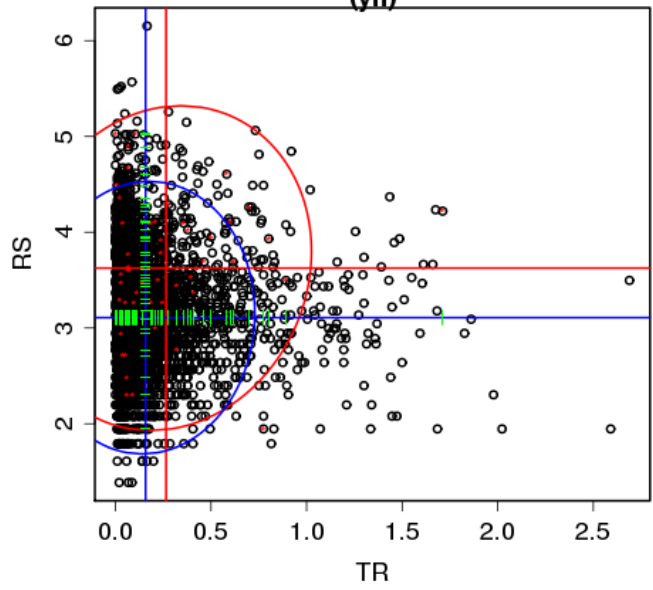

**GO:0046365**  
**monosaccharide catabolic process**  
**(yh)**

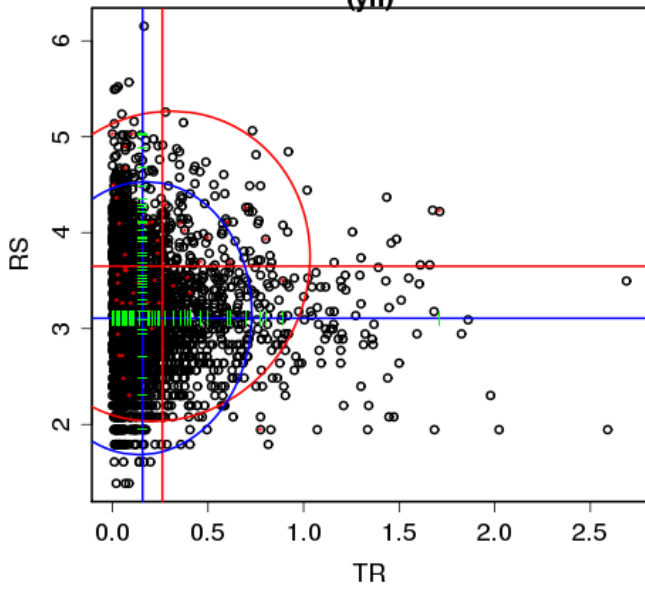

**GO:0006090**  
**pyruvate metabolic process**  
**(yh)**

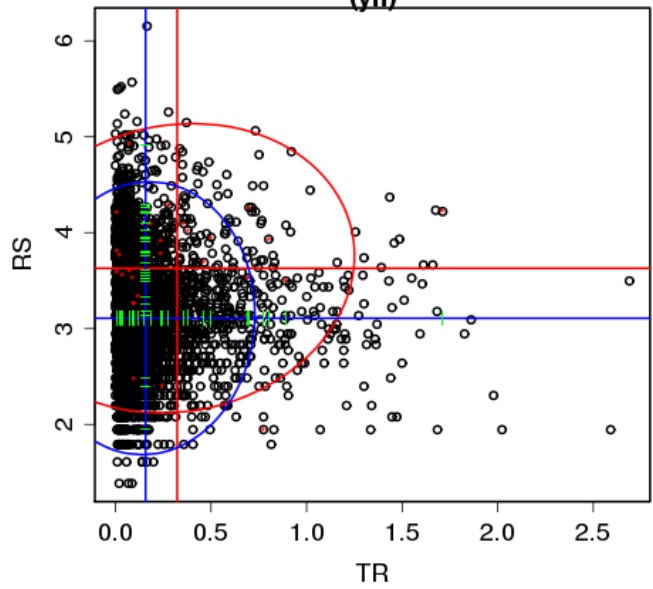

**GO:0006096**  
**glycolysis**  
**(yh)**

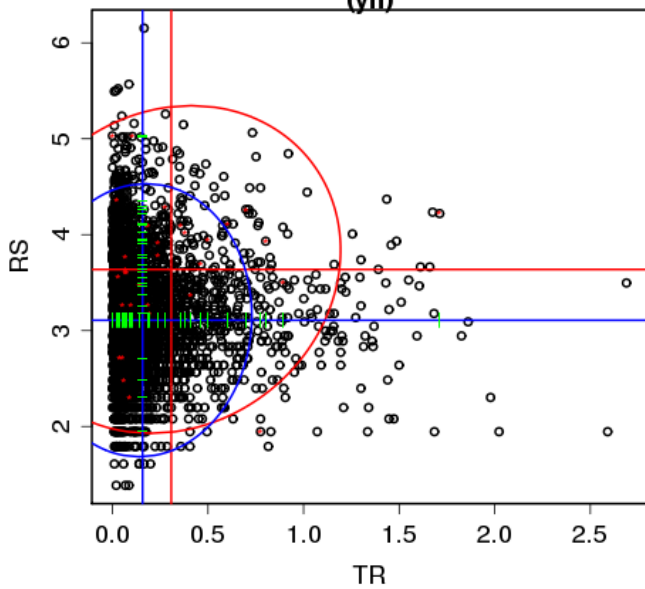

**GO:0009063**  
**amino acid catabolic process**  
**(yh)**

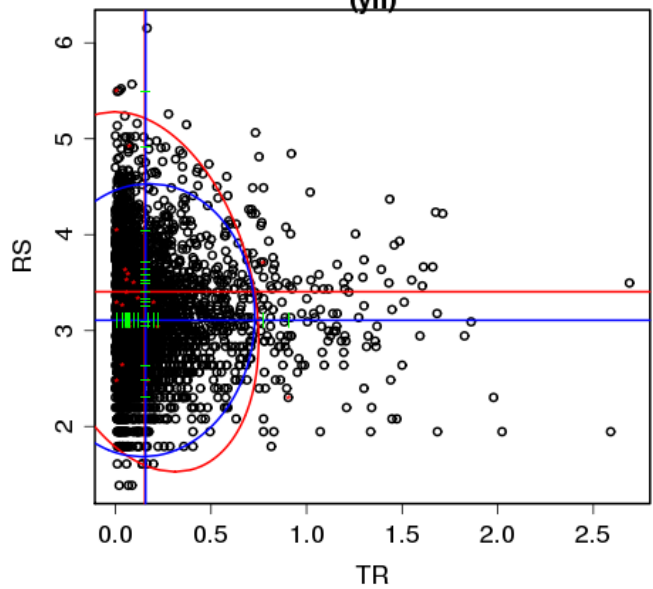

**GO:0009310**  
**amine catabolic process**  
(yh)

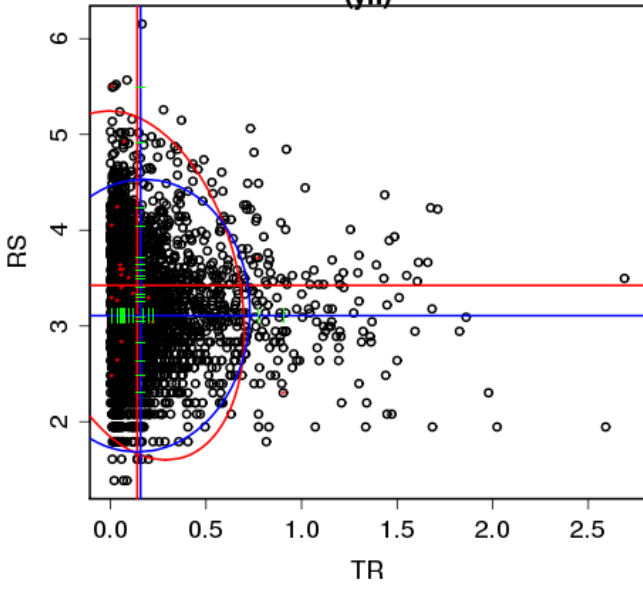

**GO:0044270**  
**nitrogen compound catabolic process**  
(yh)

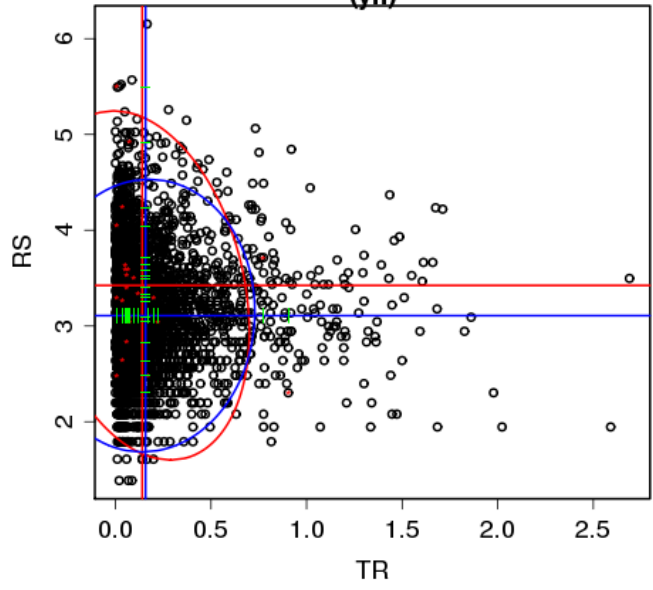

**GO:0006084**  
**acetyl-CoA metabolic process**  
(yh)

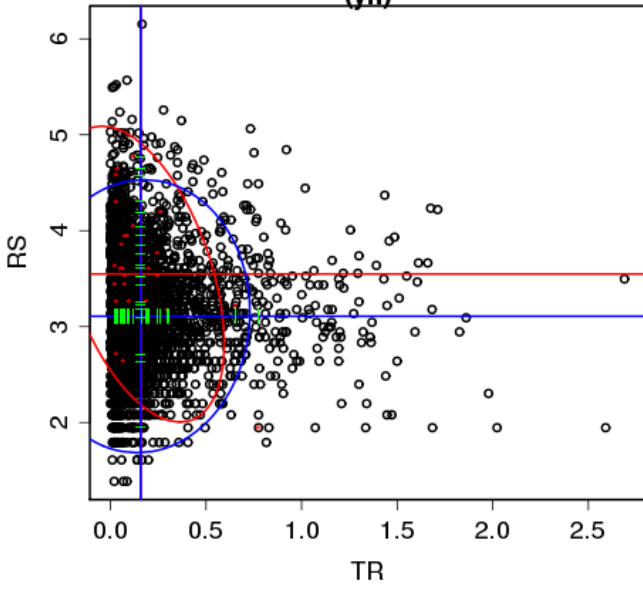

**GO:0006732**  
**coenzyme metabolic process**  
(yh)

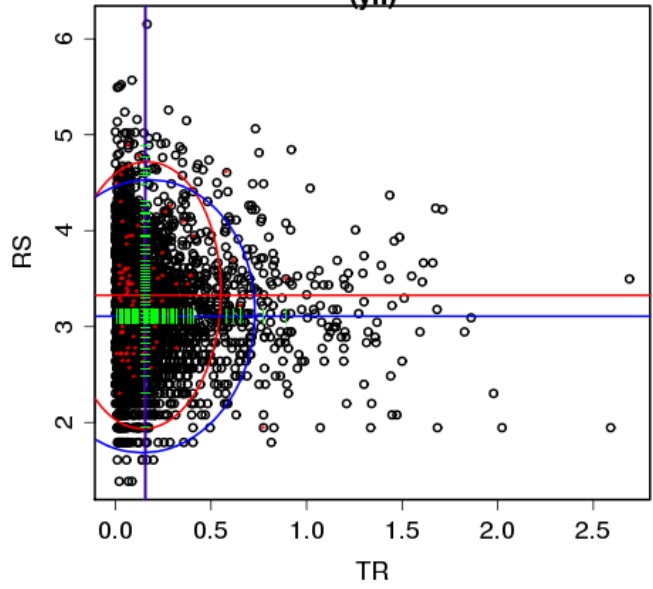

**GO:0051186**  
**cofactor metabolic process**  
(yh)

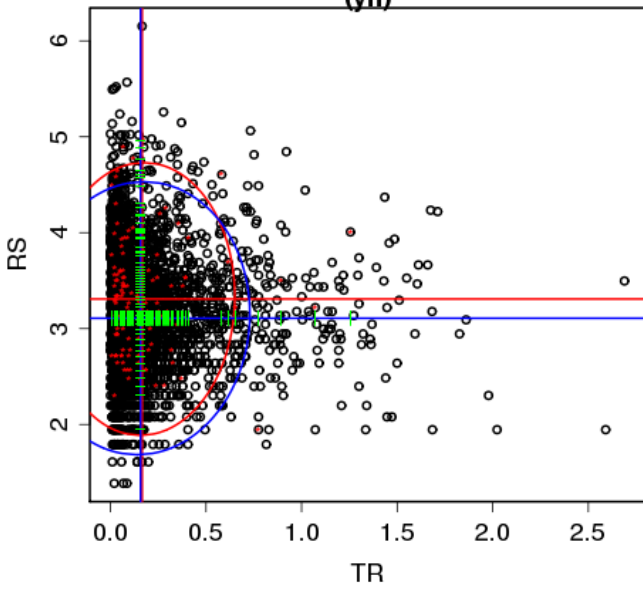

**GO:0006091**  
**generation of precursor metabolites and energy**  
(yh)

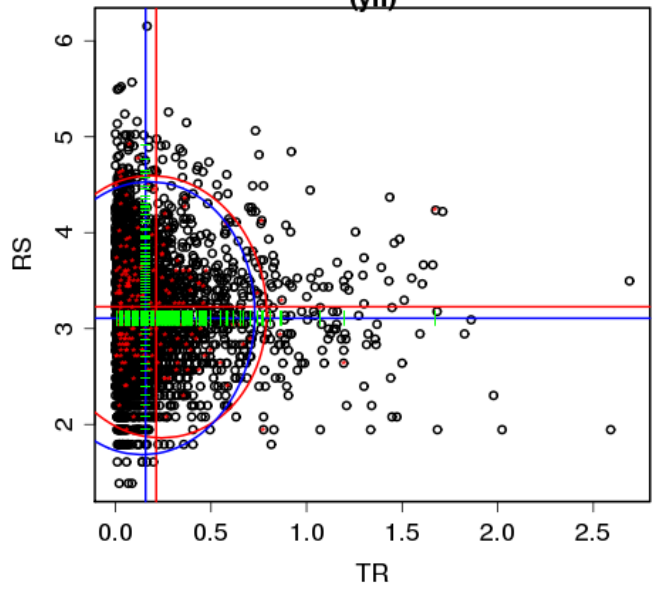



**GO:0006113**  
**fermentation**  
**(yh)**

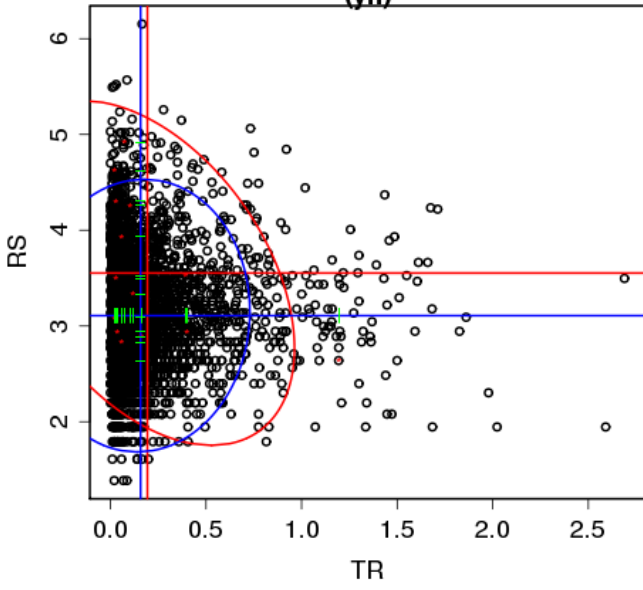

**GO:0015980**  
**energy derivation by oxidation of organic compounds**  
**(yh)**

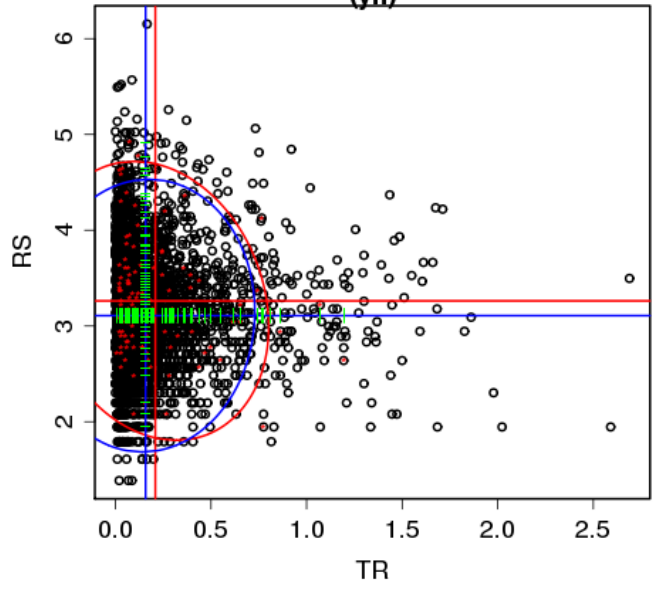

**GO:0019751**  
**polyol metabolic process**  
**(yh)**

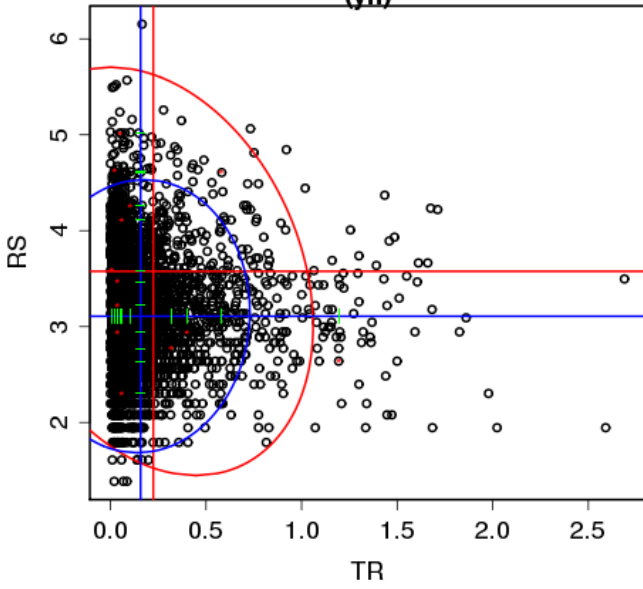

**GO:0006536**  
**glutamate metabolic process**  
**(yh)**

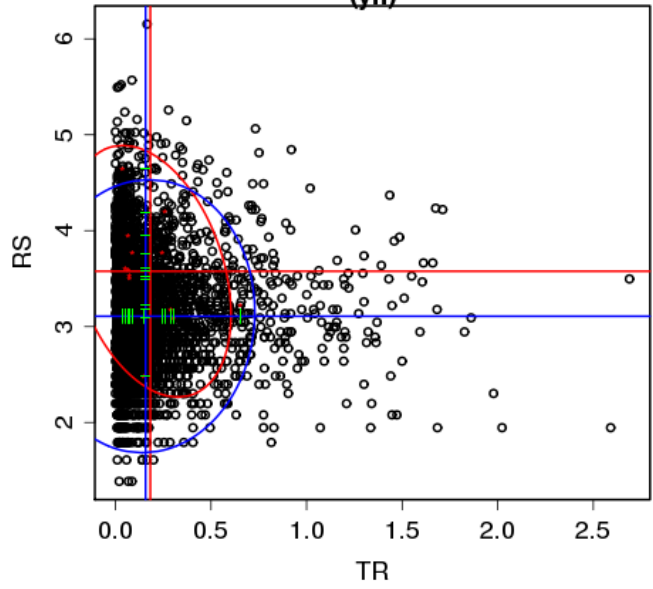

**GO:0009084**  
**glutamine family amino acid biosynthetic process**  
**(yh)**

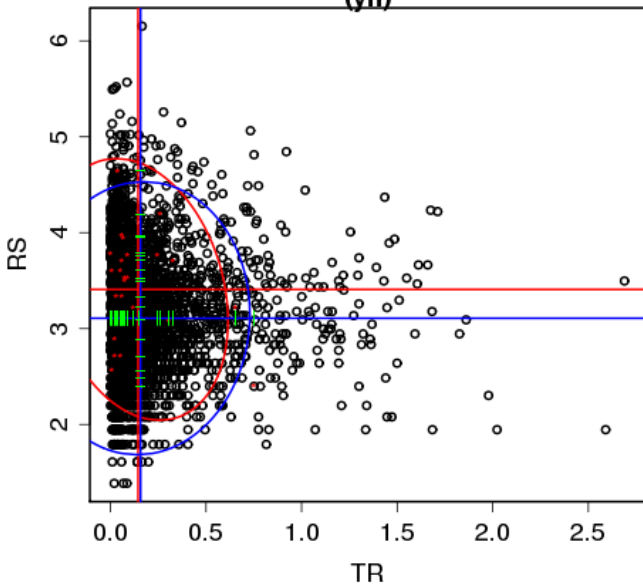

**GO:0006537**  
**glutamate biosynthetic process**  
**(yh)**

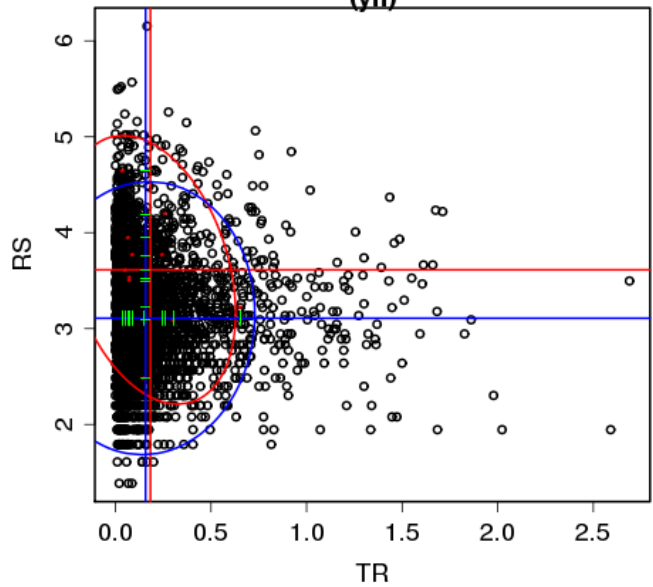

**GO:0006766**  
**vitamin metabolic process**  
(yh)

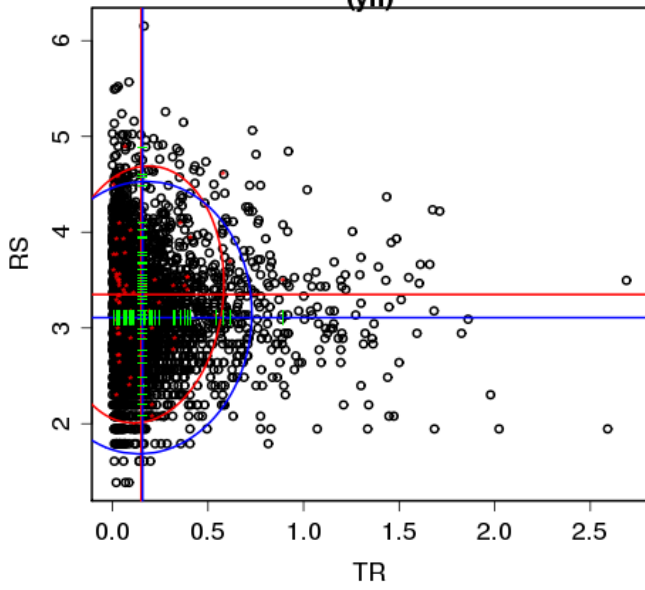

**GO:0006767**  
**water-soluble vitamin metabolic process**  
(yh)

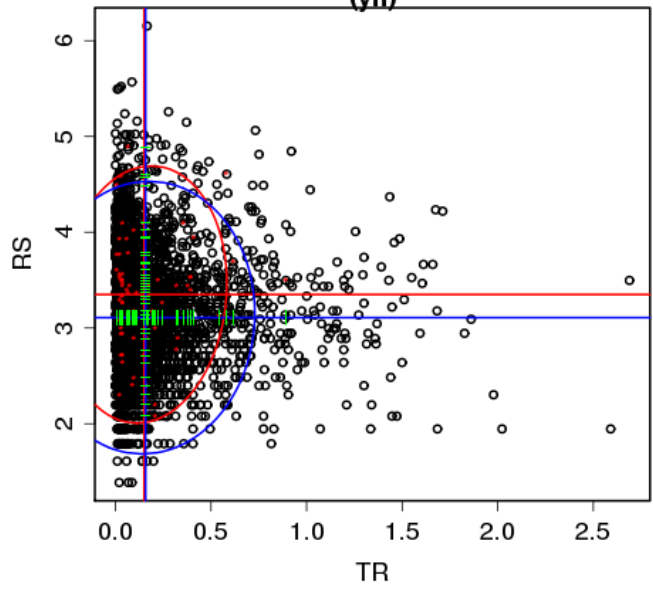

**GO:0030435**  
**sporulation**  
(yh)

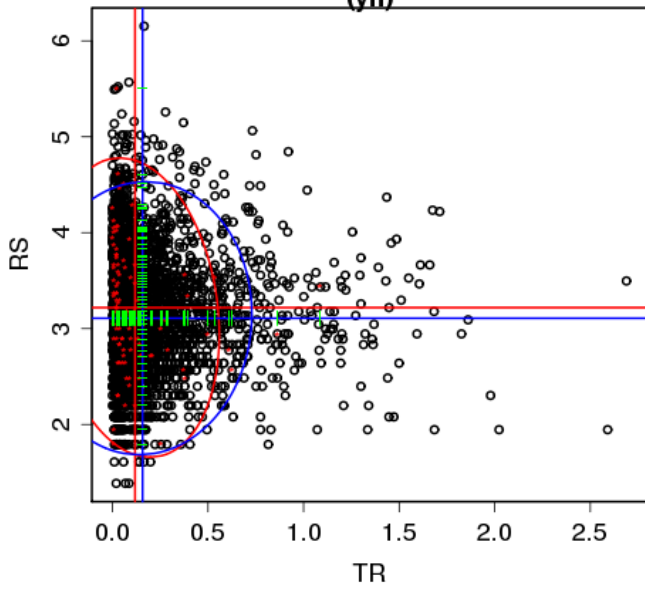

**GO:0005984**  
**disaccharide metabolic process**  
(yh)

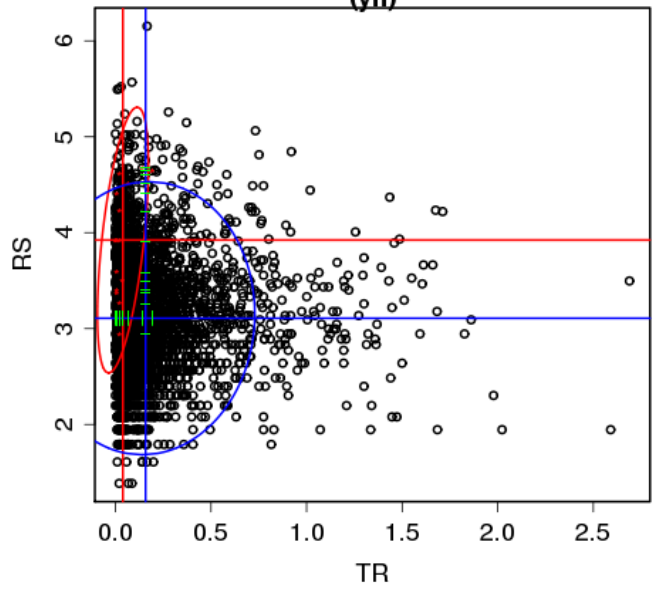

**GO:0008645**  
**hexose transport**  
(yh)

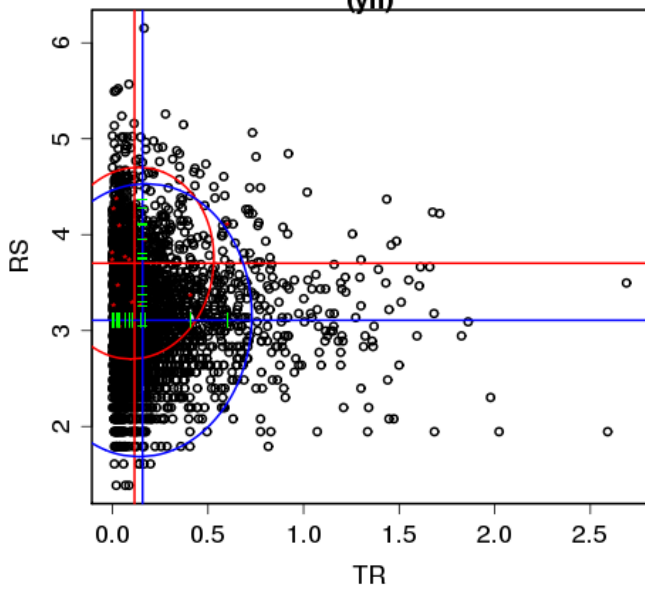

**GO:0015749**  
**monosaccharide transport**  
(yh)

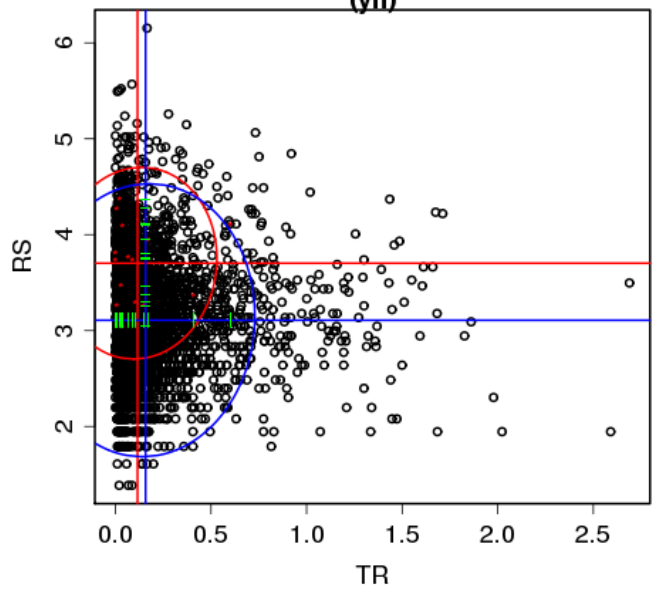



**GO:0006094**  
**gluconeogenesis**  
(yh)

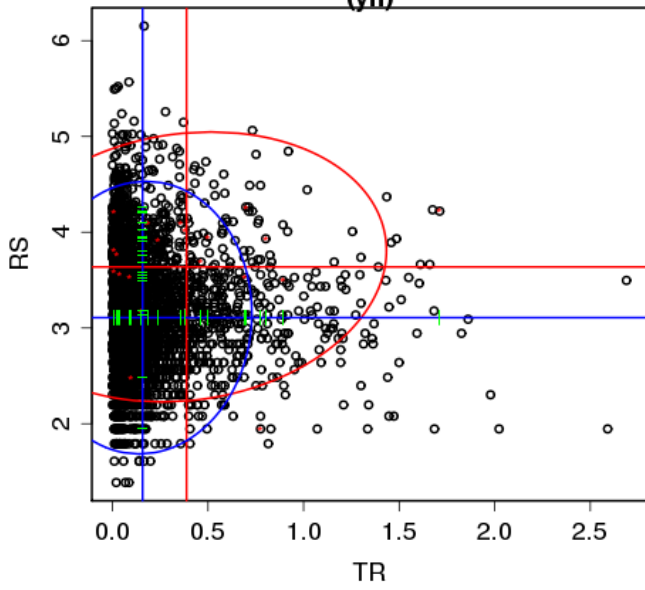

**GO:0019319**  
**hexose biosynthetic process**  
(yh)

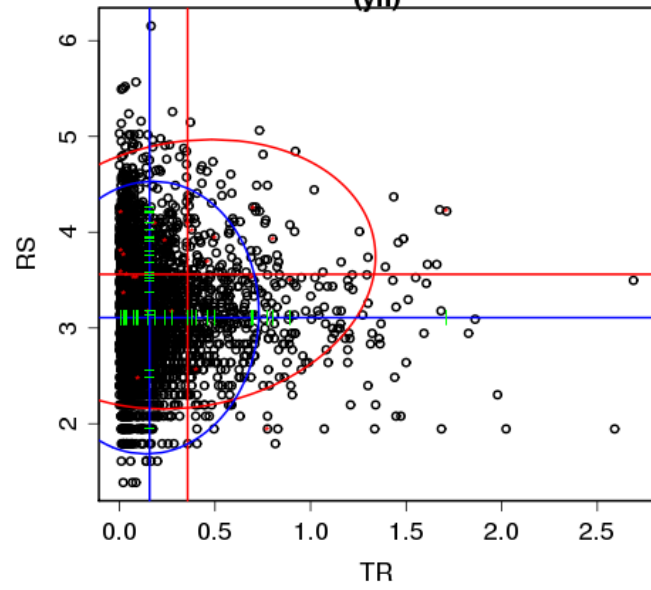

**GO:0046165**  
**alcohol biosynthetic process**  
(yh)

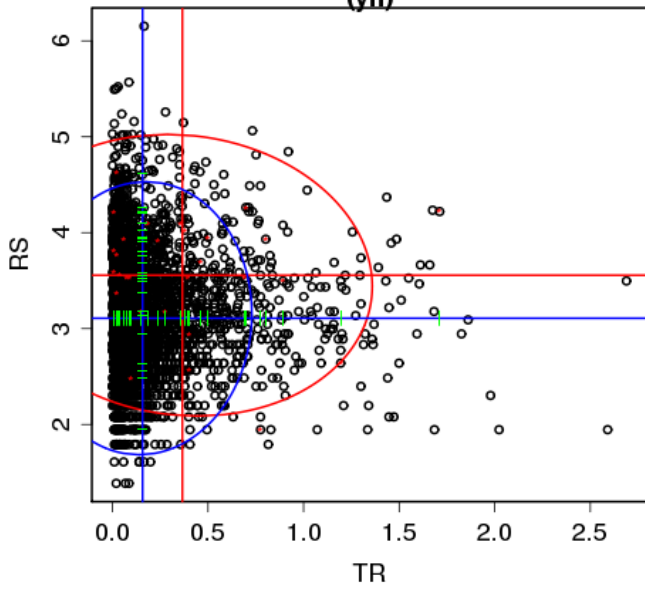

**GO:0046364**  
**monosaccharide biosynthetic process**  
(yh)

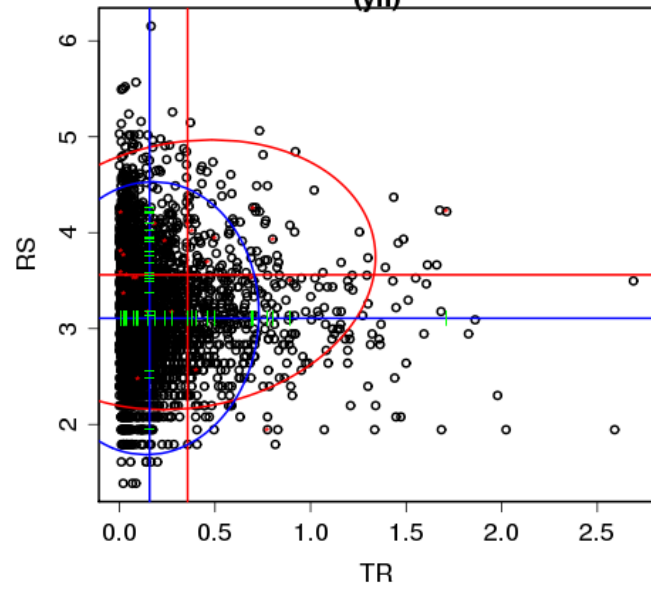

**GO:0006739**  
**NADP metabolic process**  
(yh)

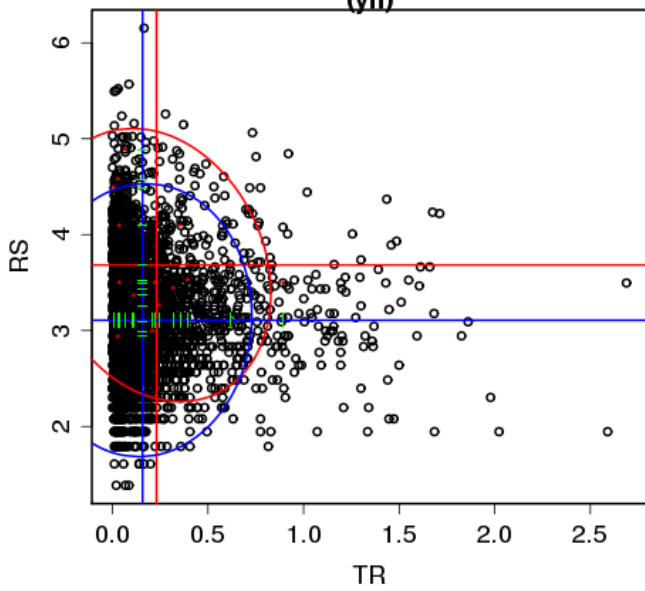

**GO:0006740**  
**NADPH regeneration**  
(yh)

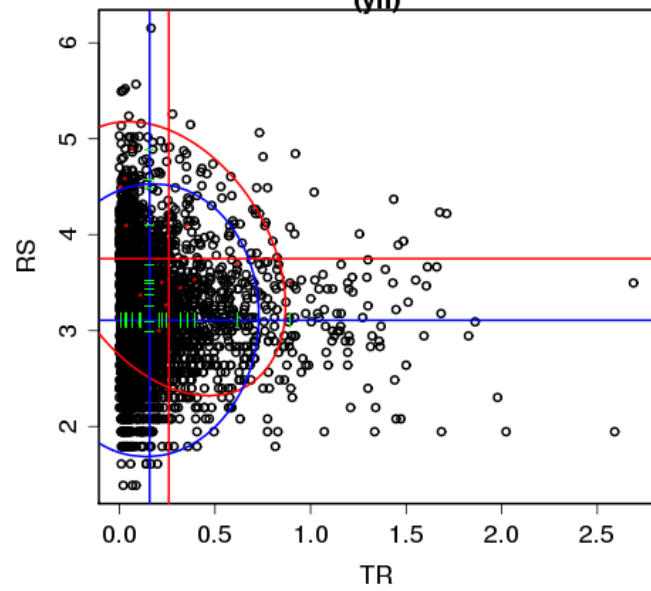

**GO:0006769**  
**nicotinamide metabolic process**  
(yh)

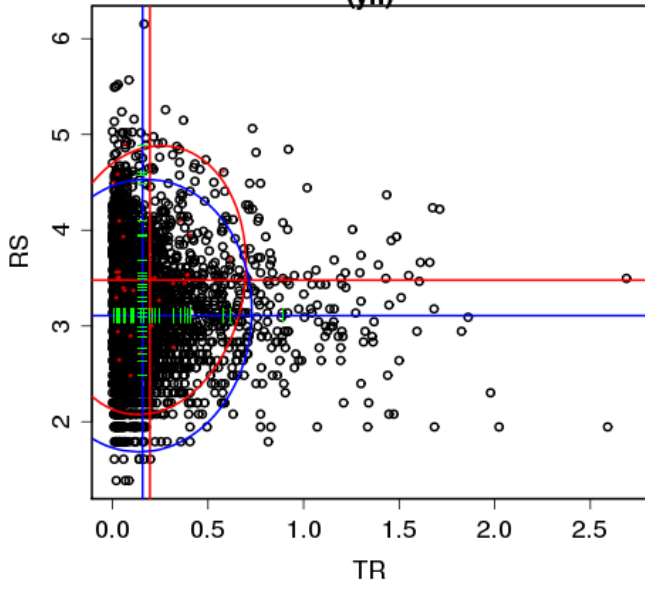

**GO:0019362**  
**pyridine nucleotide metabolic process**  
(yh)

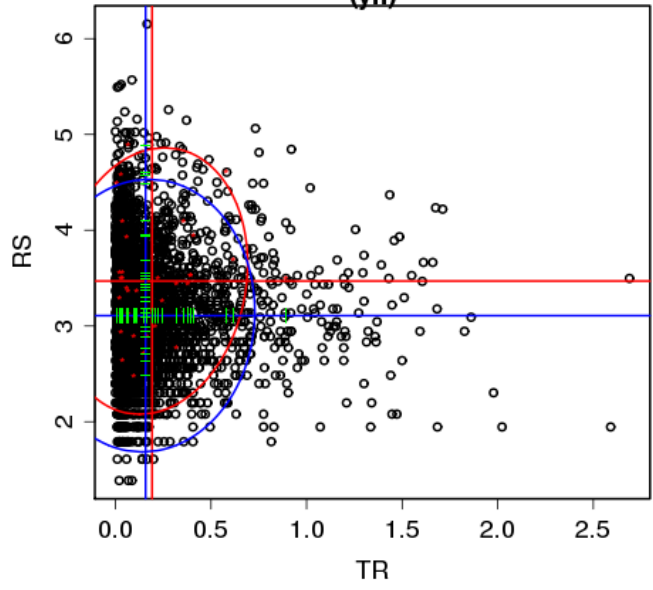

**GO:0006098**  
**pentose-phosphate shunt**  
(yh)

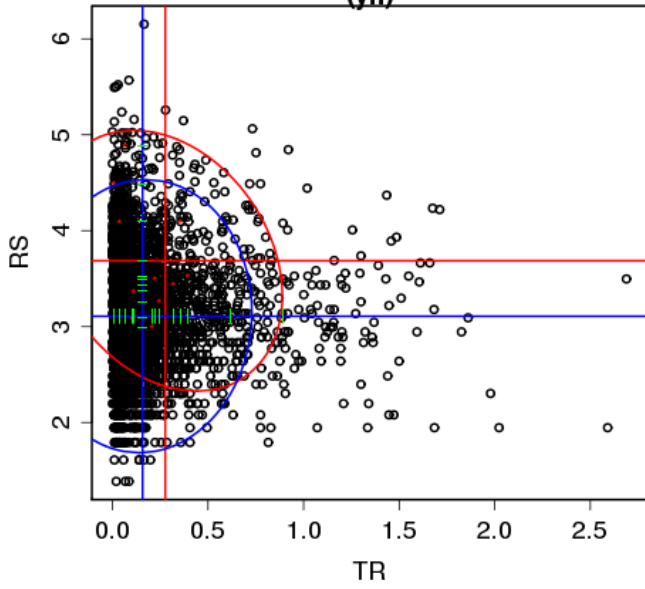

**GO:0006067**  
**ethanol metabolic process**  
(yh)

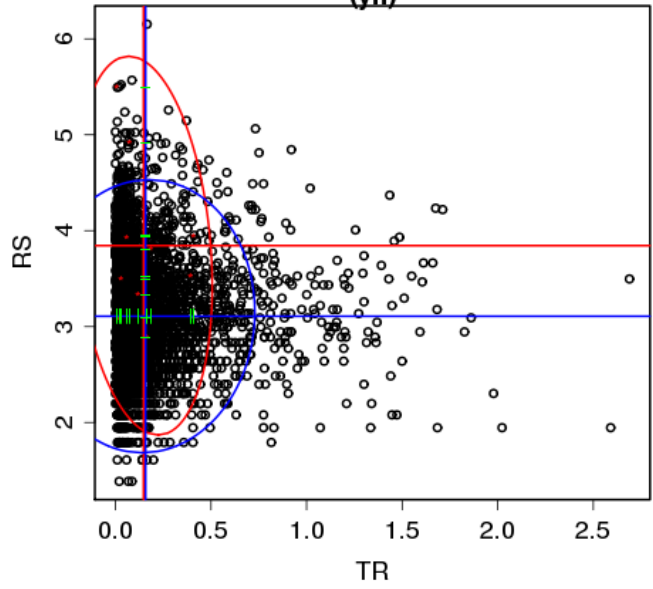

**GO:0009072**  
**aromatic amino acid family metabolic process**  
(yh)

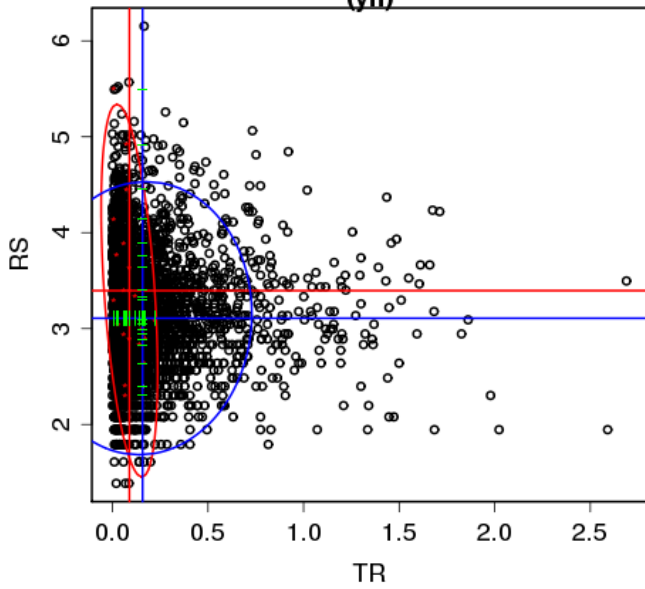

**GO:0016042**  
**lipid catabolic process**  
(yh)

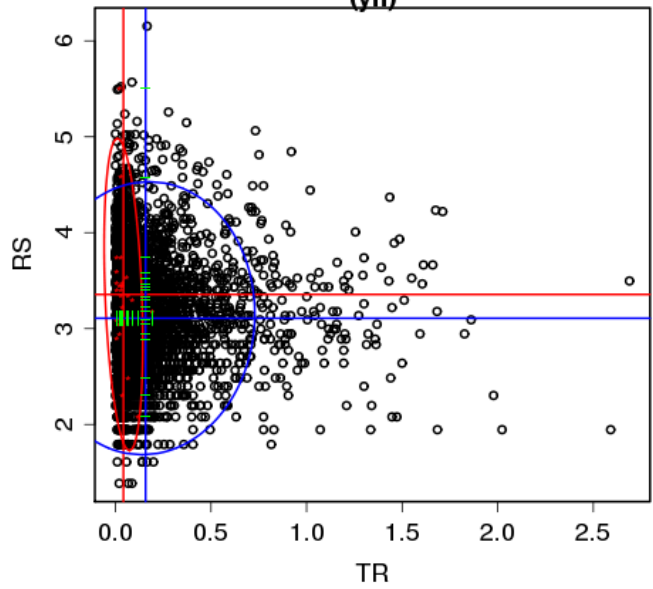

**GO:0009081**  
**branched chain family amino acid metabolic process**  
(yh)

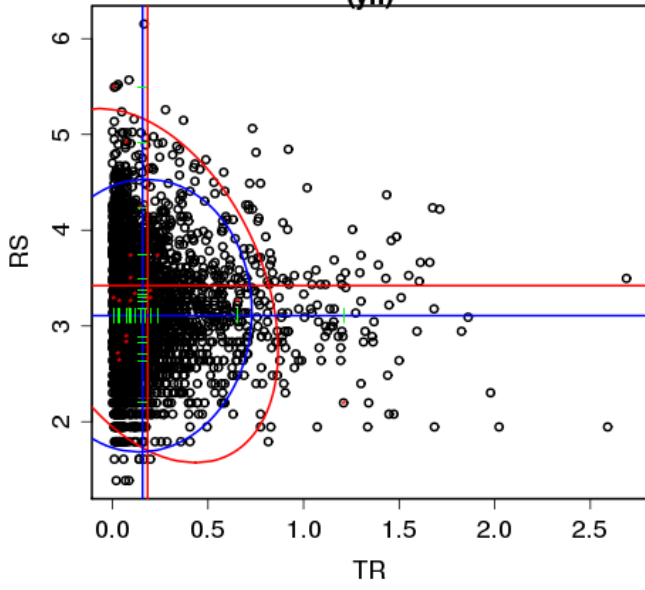

**GO:0006081**  
**aldehyde metabolic process**  
(yh)

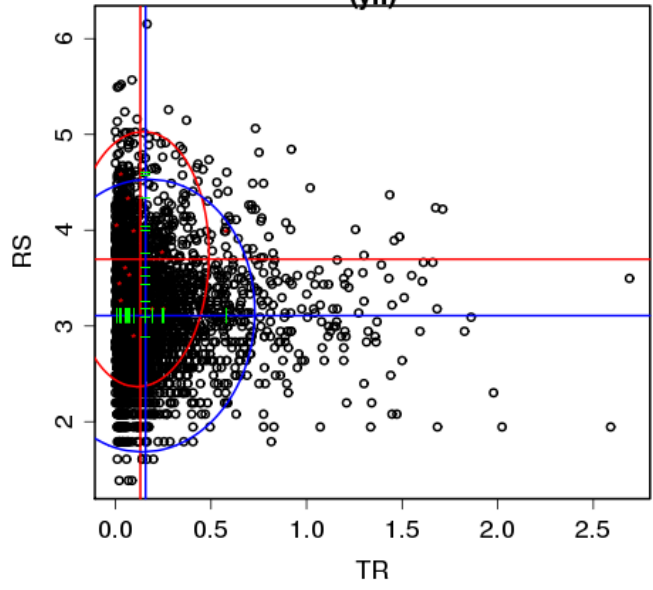

**GO:0009109**  
**coenzyme catabolic process**  
(yh)

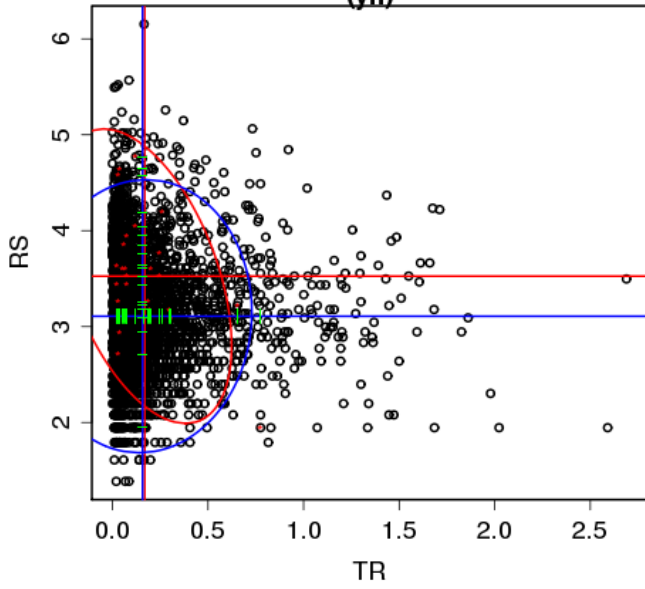

**GO:0046356**  
**acetyl-CoA catabolic process**  
(yh)

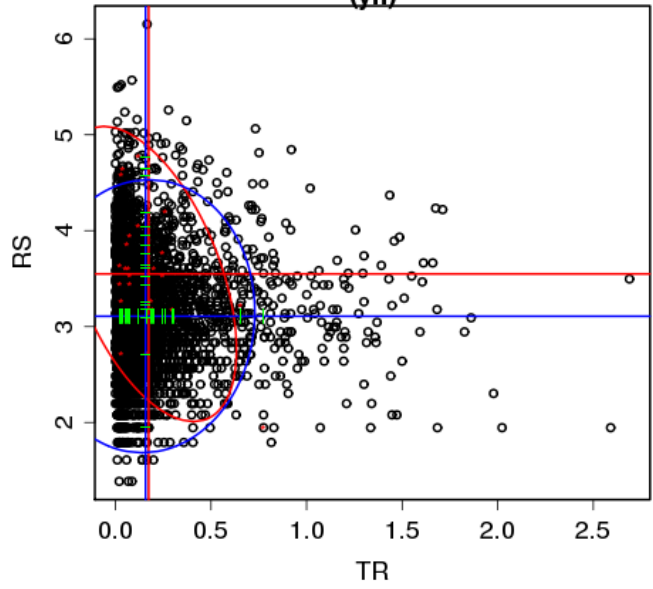

**GO:0051187**  
**cofactor catabolic process**  
(yh)

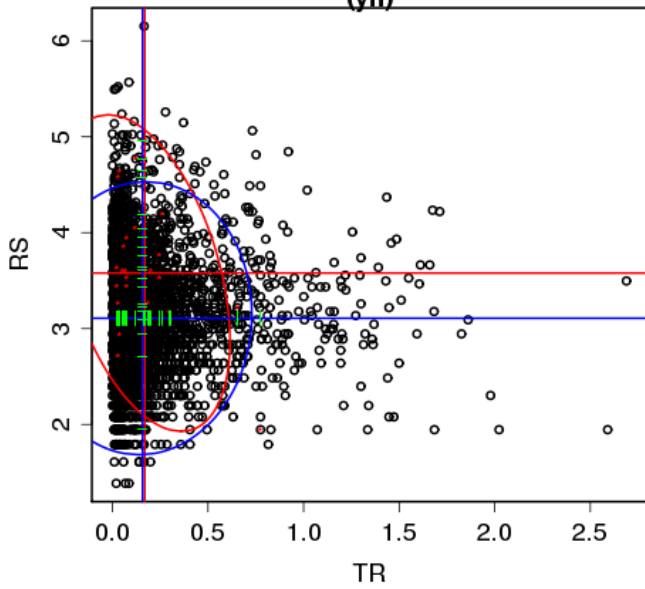

**GO:0006100**  
(yh)

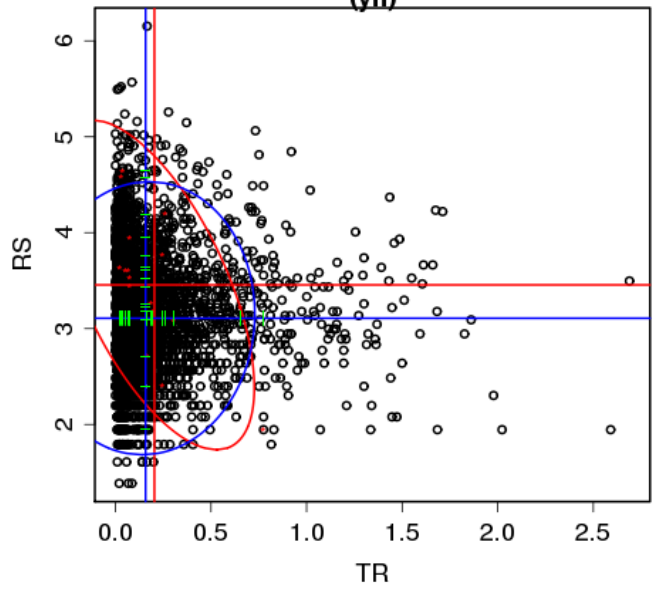

**GO:0006099**  
tricarboxylic acid cycle  
(yh)

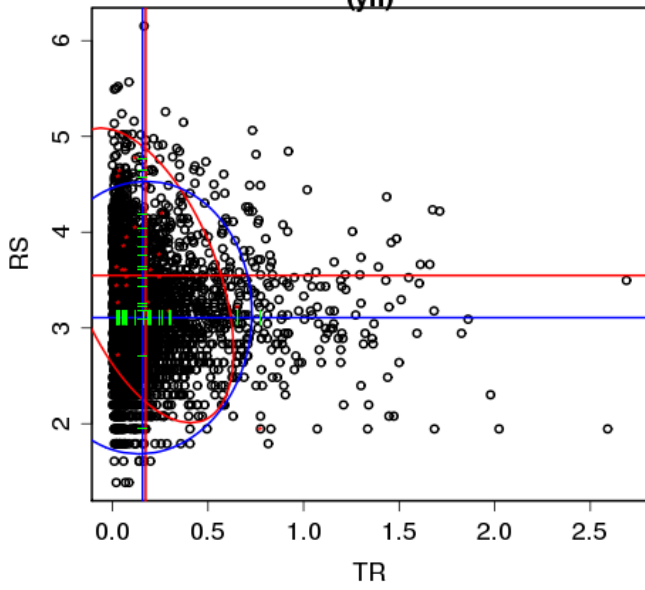

**GO:0006071**  
glycerol metabolic process  
(yh)

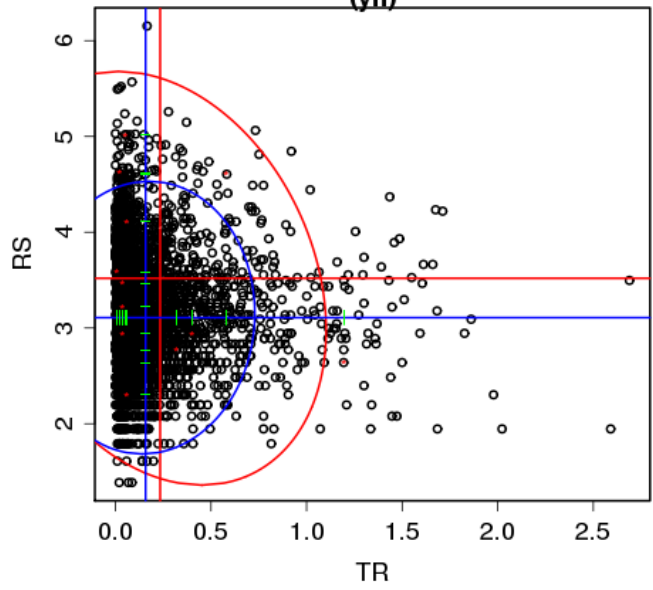

**GO:0044242**  
cellular lipid catabolic process  
(yh)

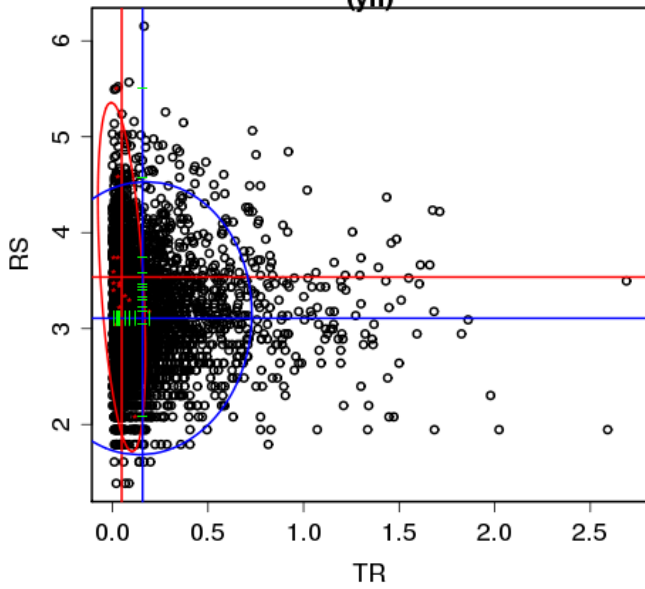

**GO:0022607**  
cellular component assembly  
(yl)

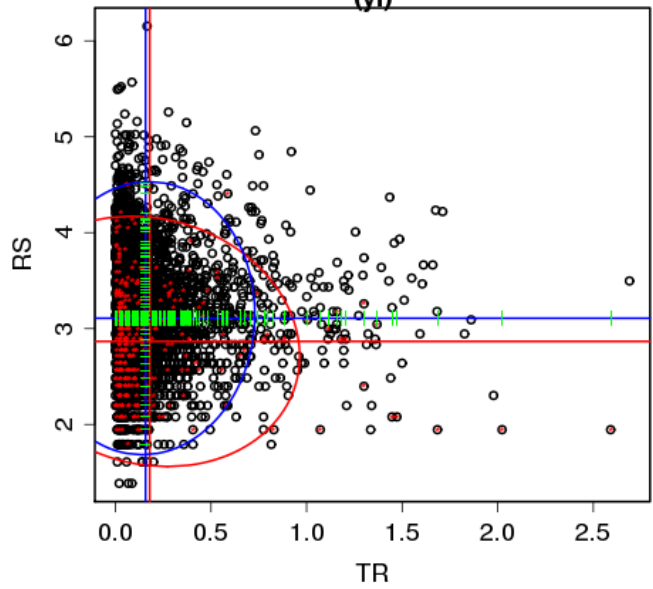

**GO:0065003**  
macromolecular complex assembly  
(yl)

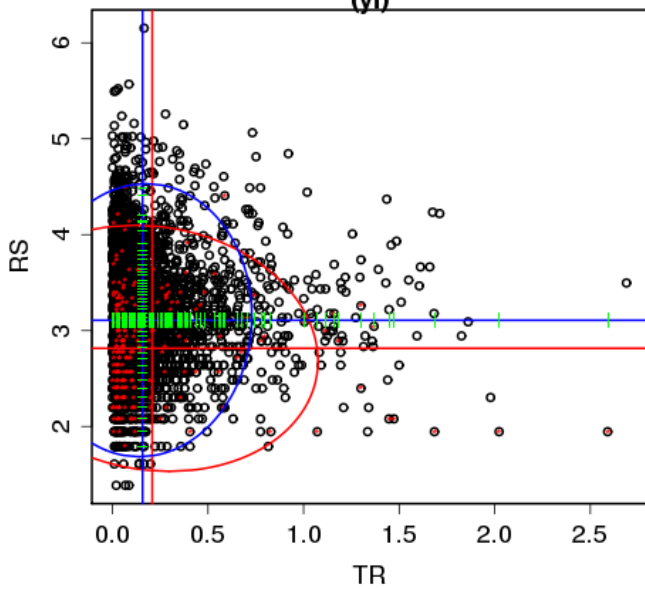

**GO:0006366**  
transcription from RNA polymerase II promoter  
(yl)

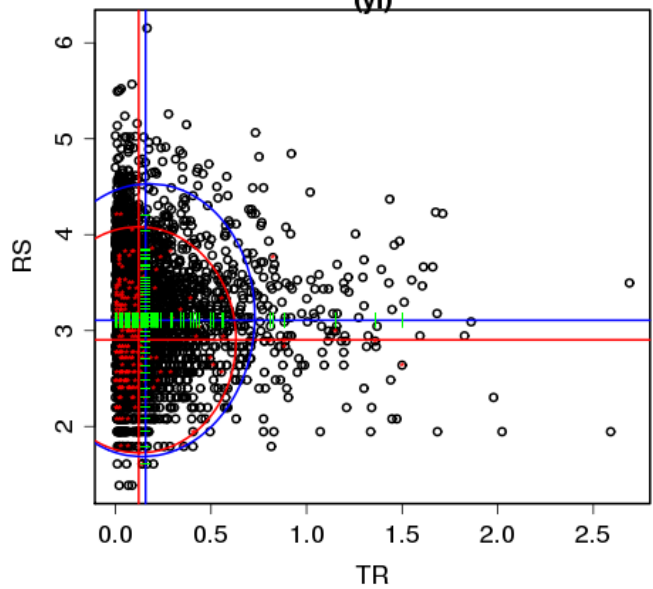

**GO:0006357**  
regulation of transcription from RNA polymerase II prom  
(yl)

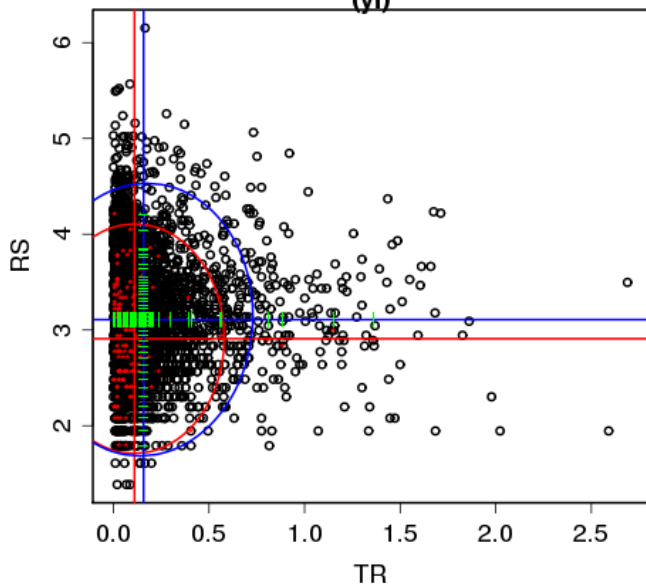

**GO:0016568**  
chromatin modification  
(yl)

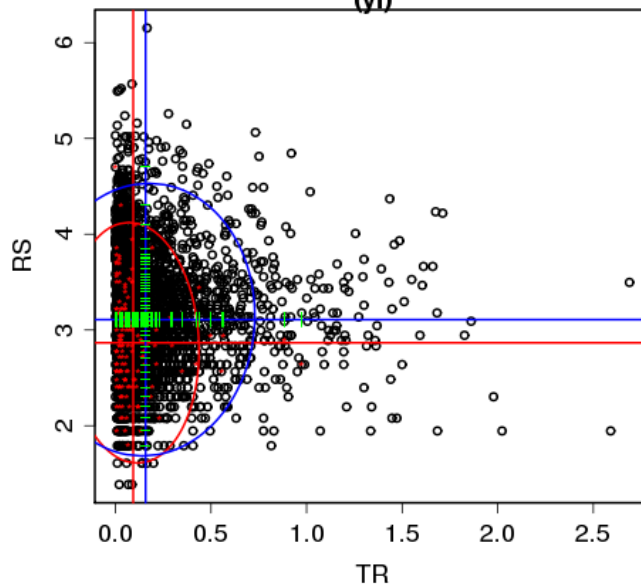

**GO:0009059**  
macromolecule biosynthetic process  
(yl)

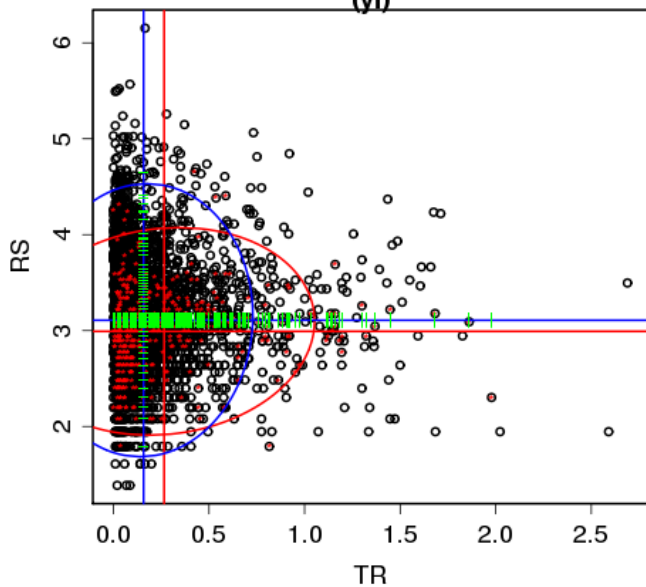

**GO:0000278**  
mitotic cell cycle  
(yl)

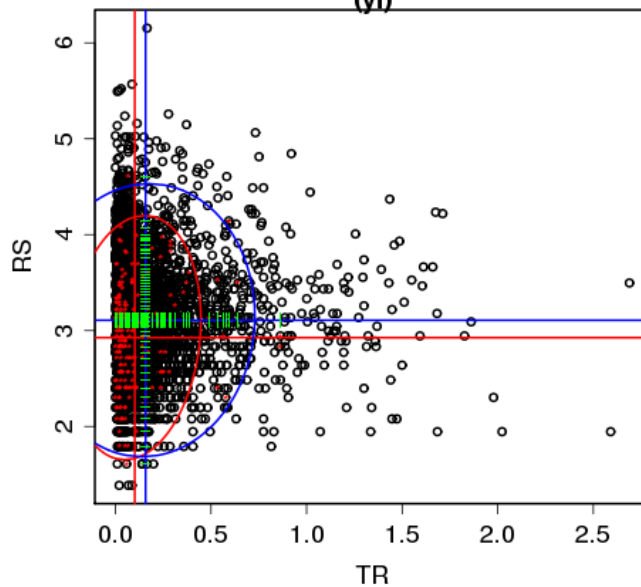

**GO:0051726**  
regulation of cell cycle  
(yl)

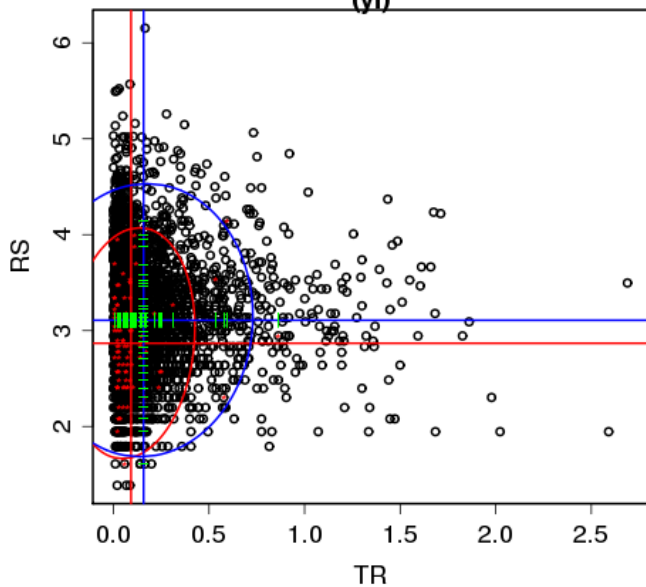

**GO:0006396**  
RNA processing  
(yl)

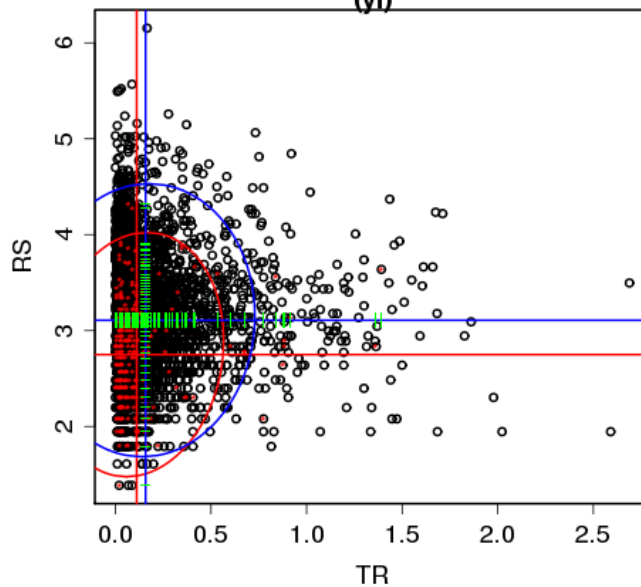

**GO:0008033**  
**tRNA processing**  
(yl)

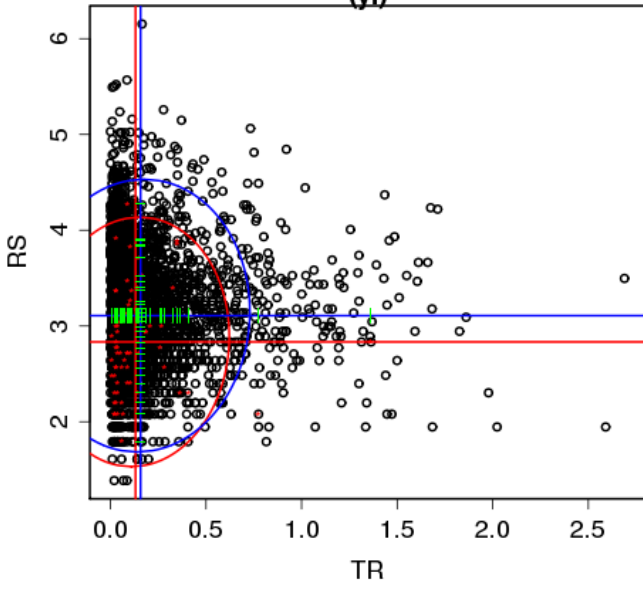

**GO:0009451**  
**RNA modification**  
(yl)

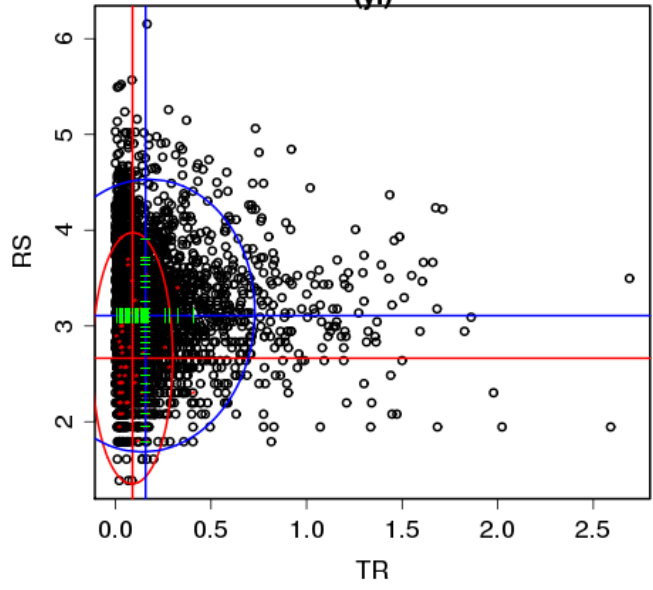

**GO:0006400**  
**tRNA modification**  
(yl)

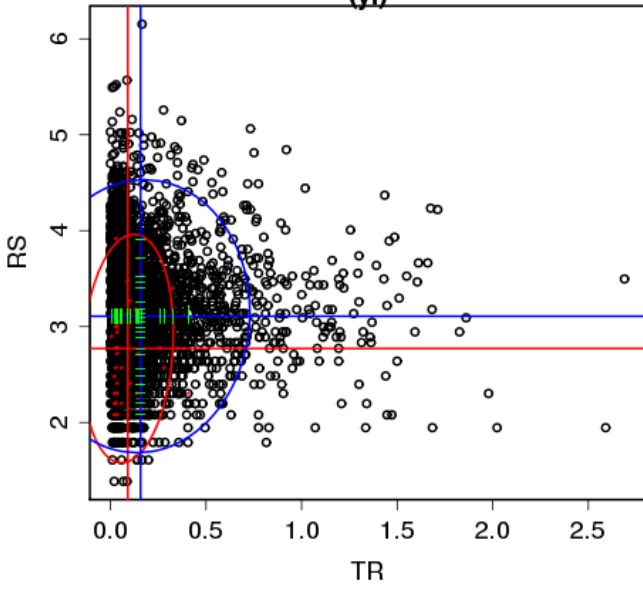

**GO:0006401**  
**RNA catabolic process**  
(yl)

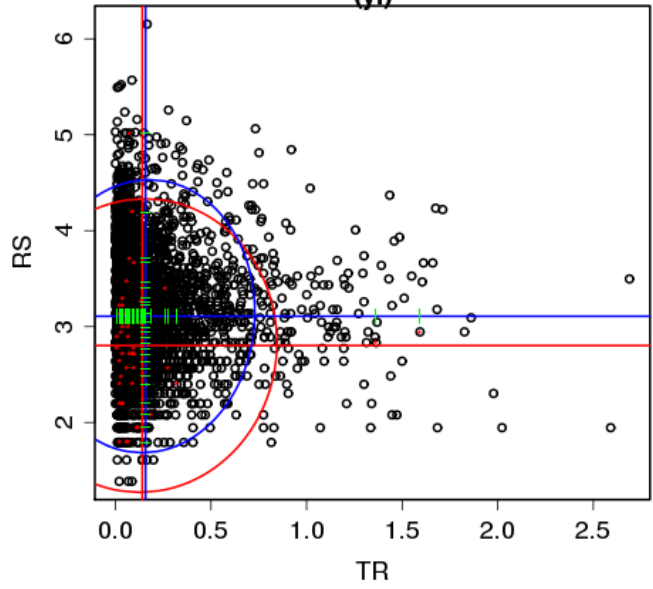

**GO:0006402**  
**mRNA catabolic process**  
(yl)

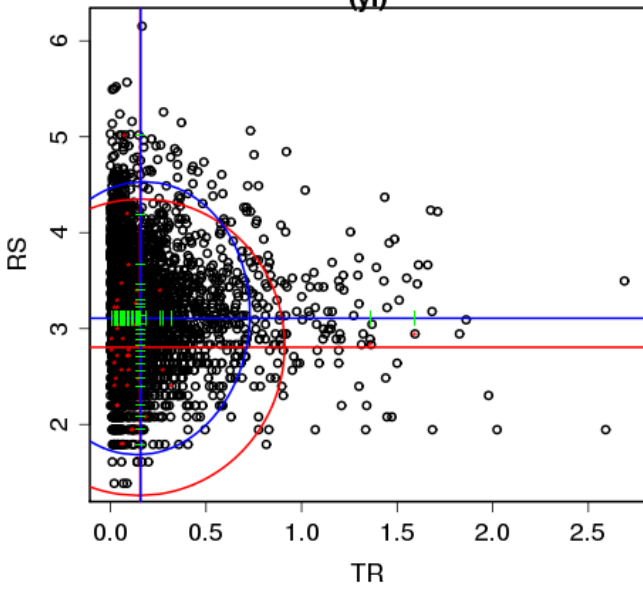

**GO:0016071**  
**mRNA metabolic process**  
(yl)

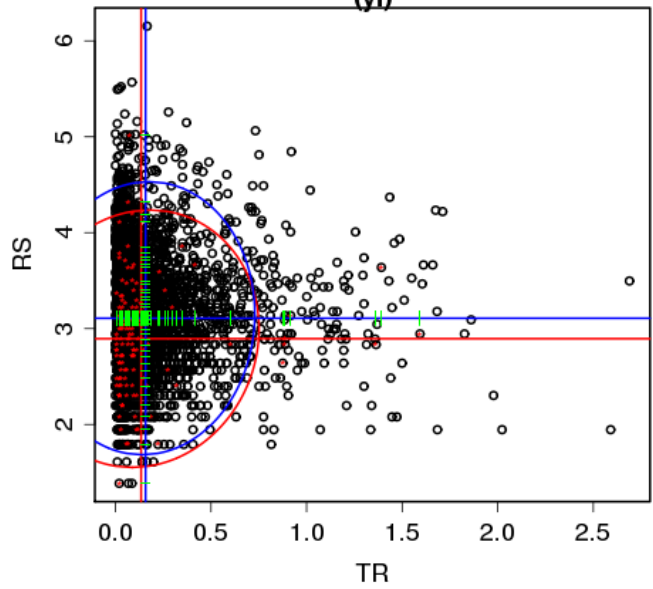



**GO:0006397**  
**mRNA processing**  
(yl)

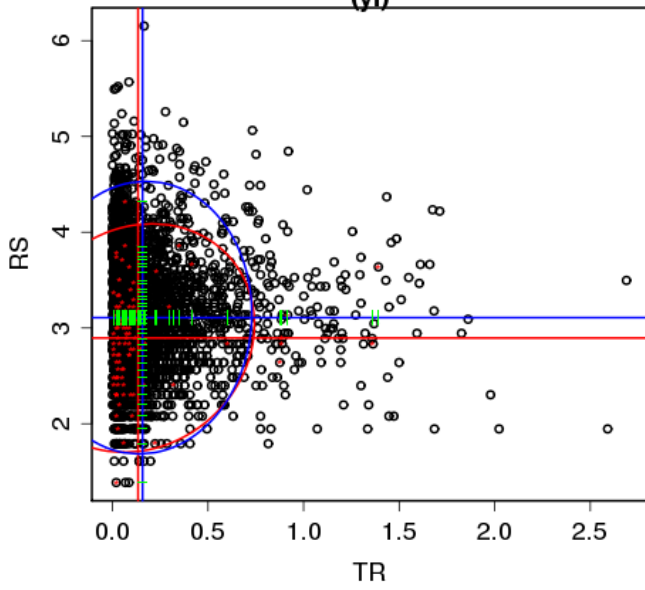

**GO:0051325**  
**interphase**  
(yl)

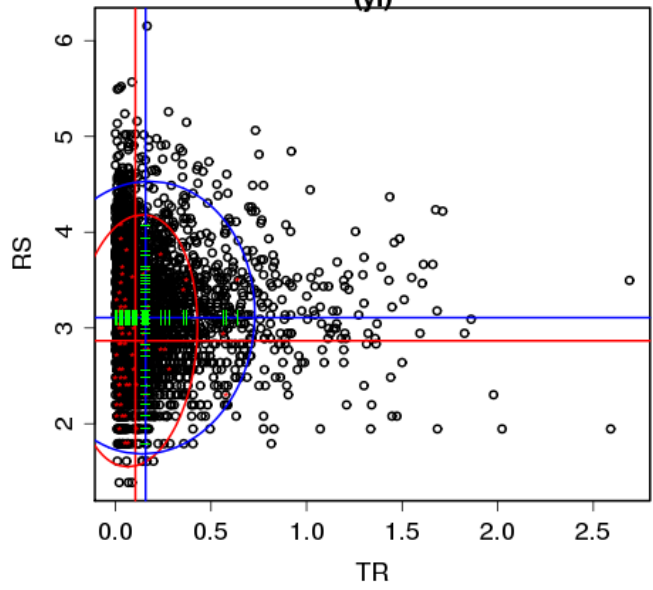

**GO:0051329**  
**interphase of mitotic cell cycle**  
(yl)

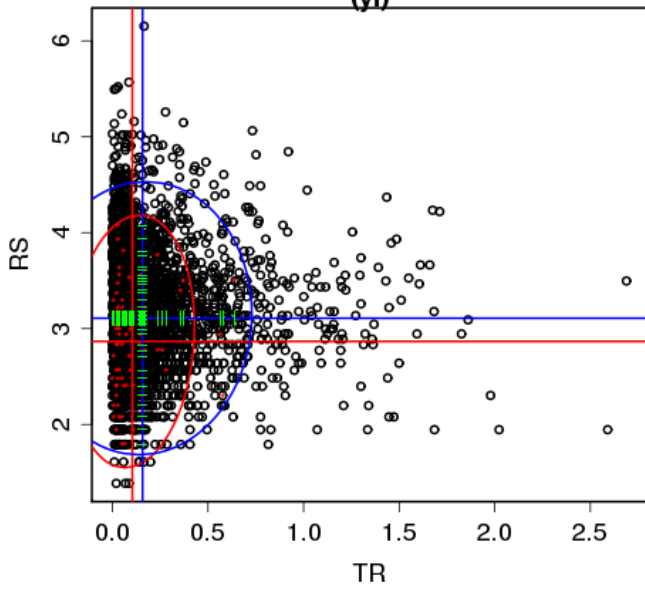

**GO:0006486**  
**protein amino acid glycosylation**  
(yl)

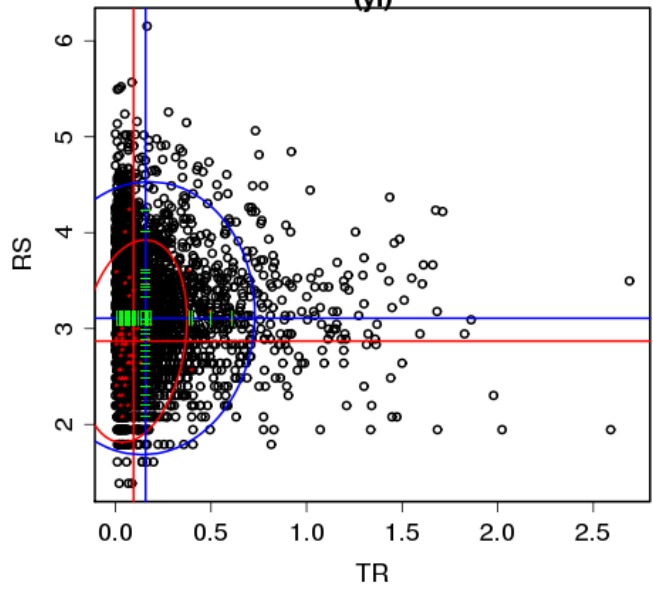

**GO:0009100**  
**glycoprotein metabolic process**  
(yl)

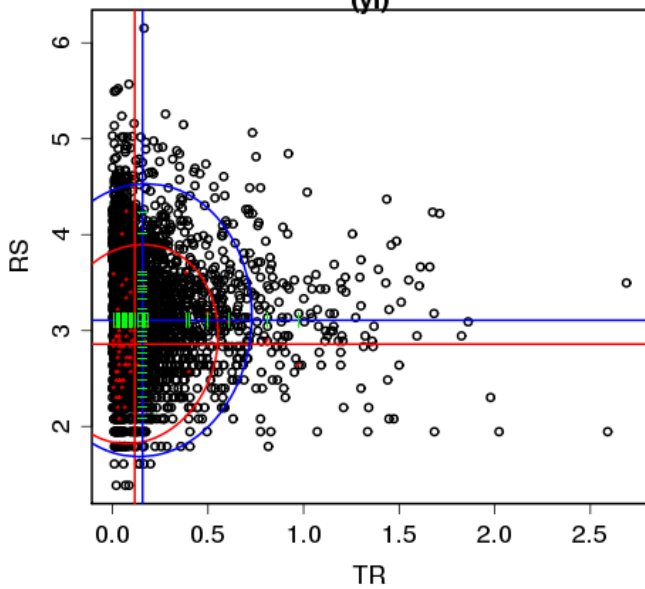

**GO:0009101**  
**glycoprotein biosynthetic process**  
(yl)

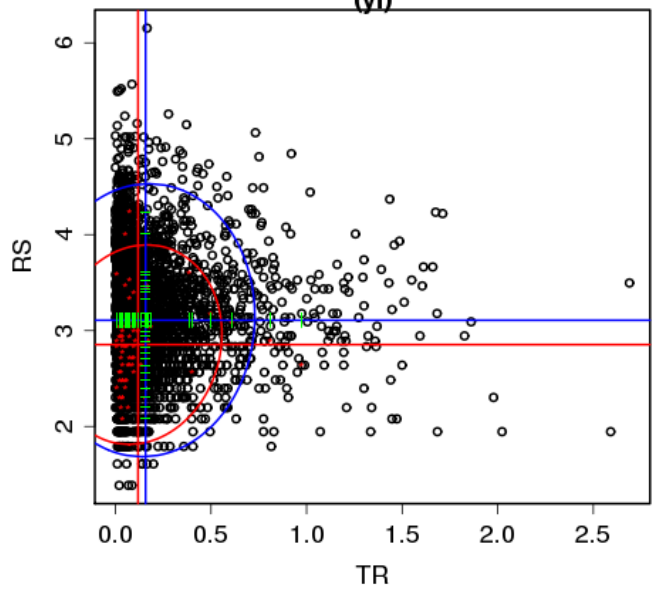

**GO:0043413**  
**biopolymer glycosylation**  
(yl)

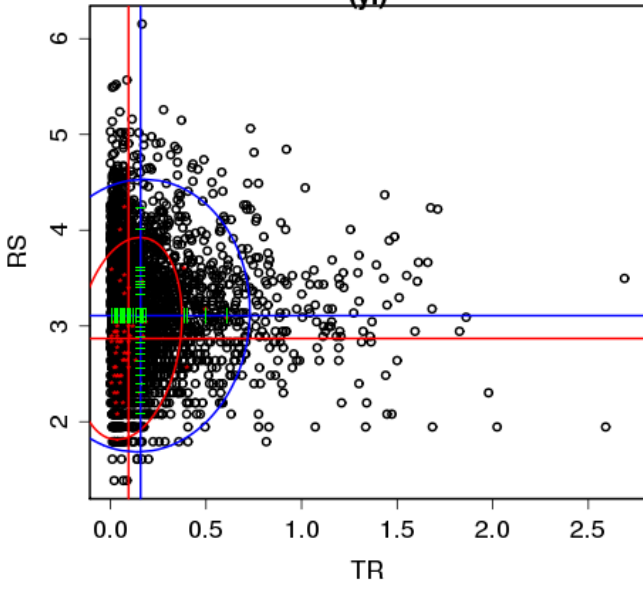

**GO:0000087**  
**M phase of mitotic cell cycle**  
(yl)

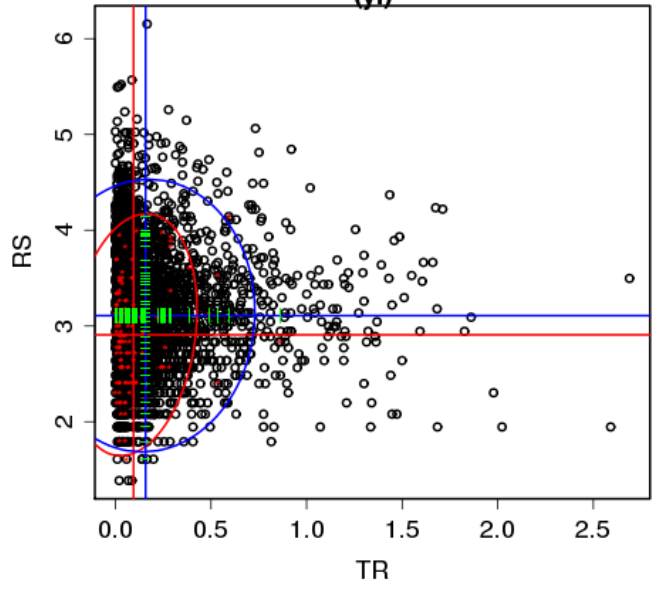

**GO:0007067**  
**mitosis**  
(yl)

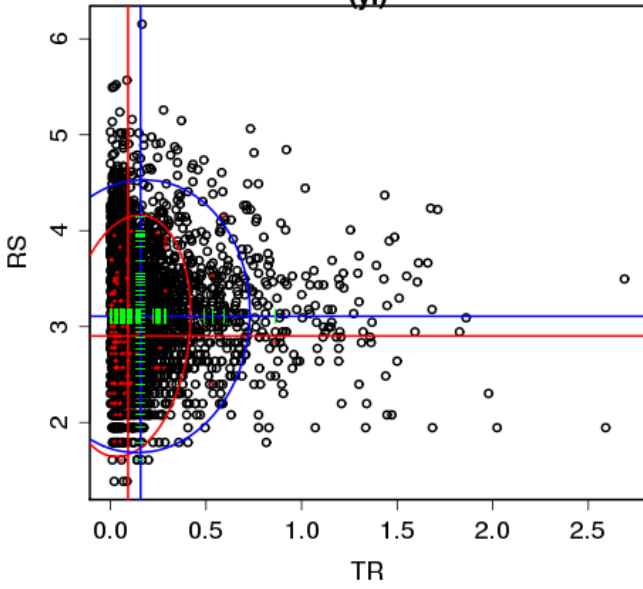

**GO:0007088**  
**regulation of mitosis**  
(yl)

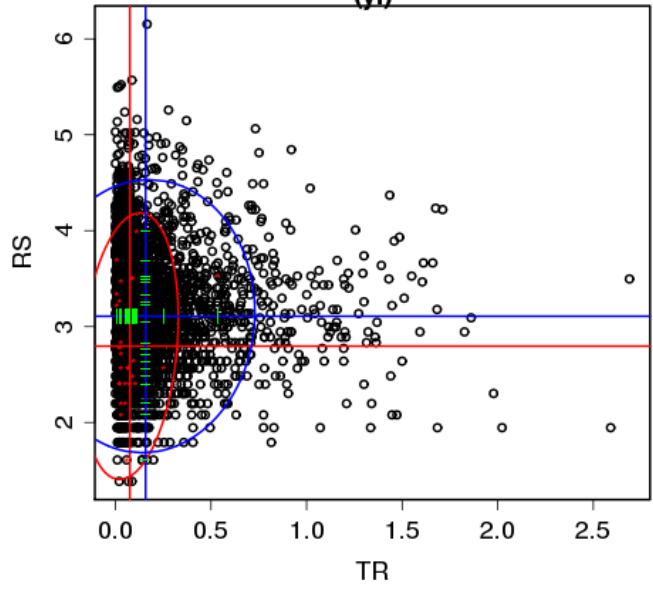

**GO:0016072**  
**rRNA metabolic process**  
(yl)

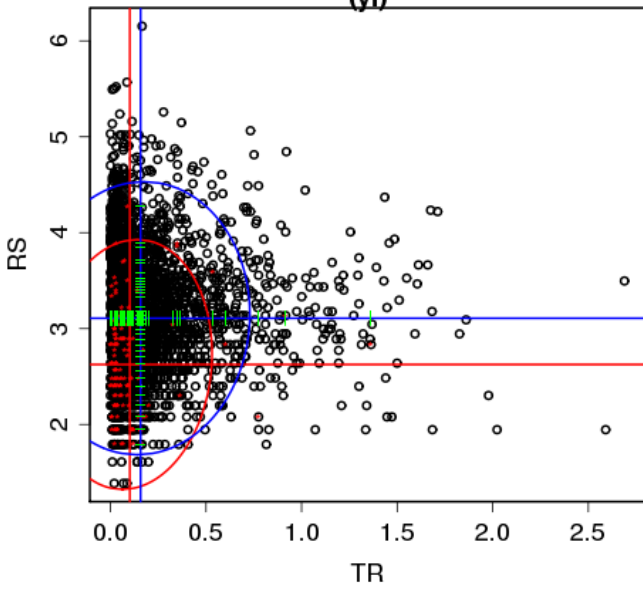

**GO:0006364**  
**rRNA processing**  
(yl)

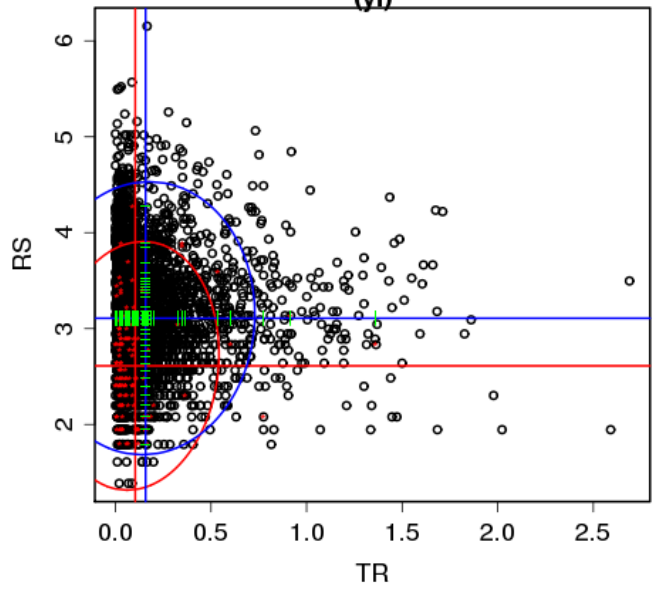



**GO:0022618**  
**ribonucleoprotein complex assembly**  
(yl)

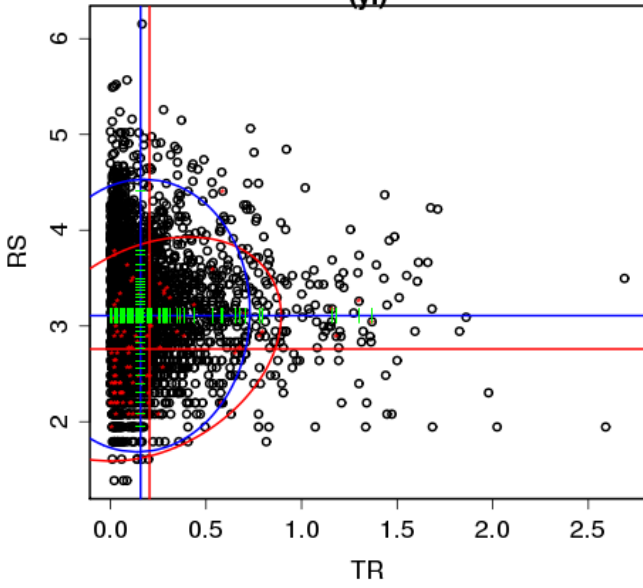

**GO:0006413**  
**translational initiation**  
(yl)

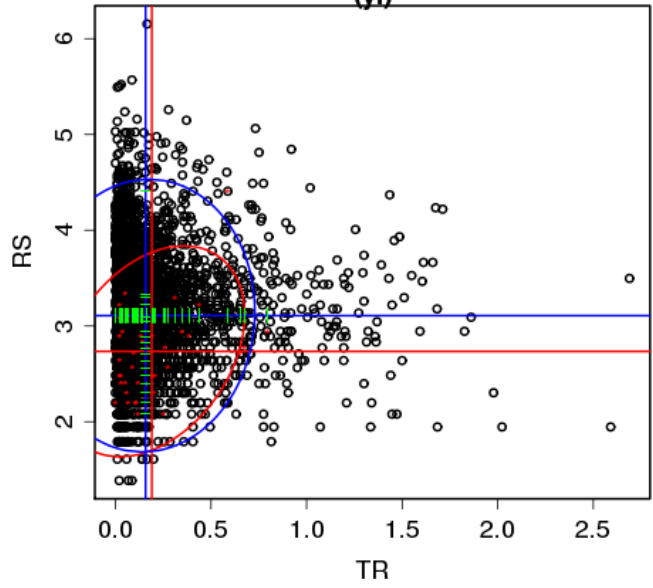

**GO:0007166**  
**cell surface receptor linked signal transduction**  
(yl)

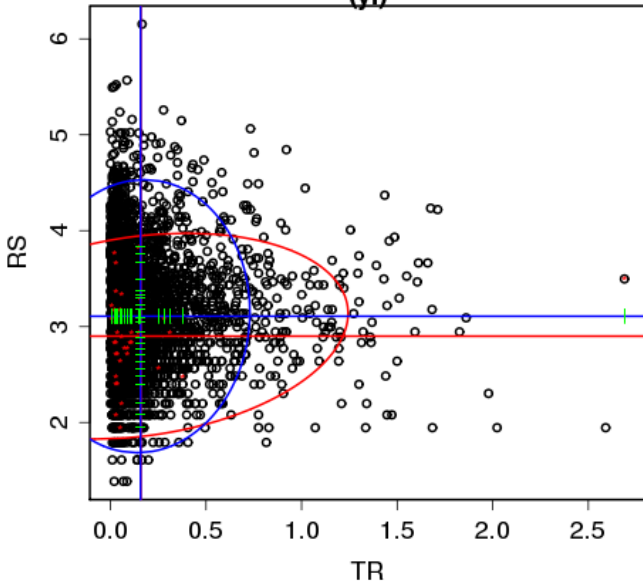

**GO:0031137**  
**regulation of conjugation with cellular fusion**  
(yl)

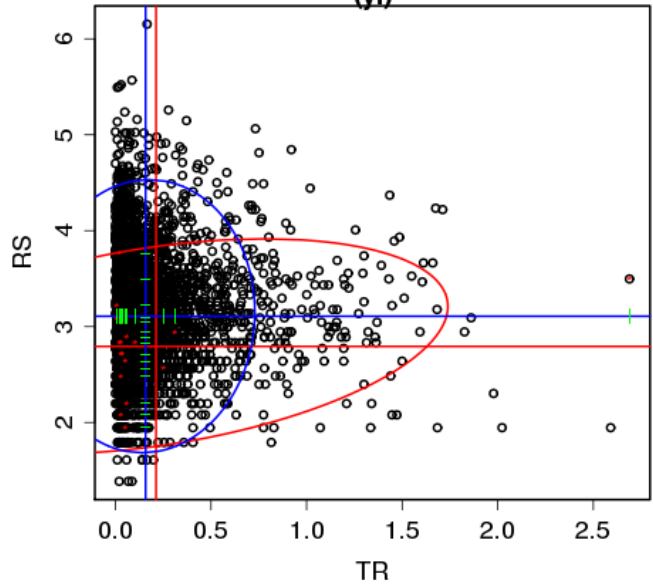

**GO:0032005**  
**signal transduction during conjugation with cellular fusion**  
(yl)

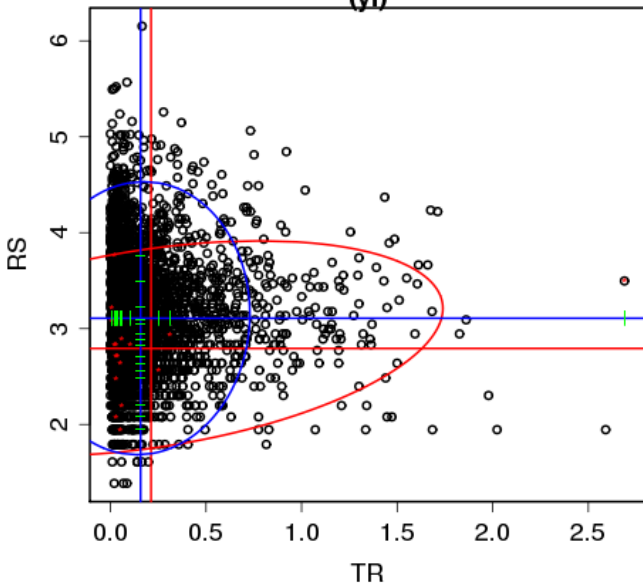

**GO:0046999**  
**regulation of conjugation**  
(yl)

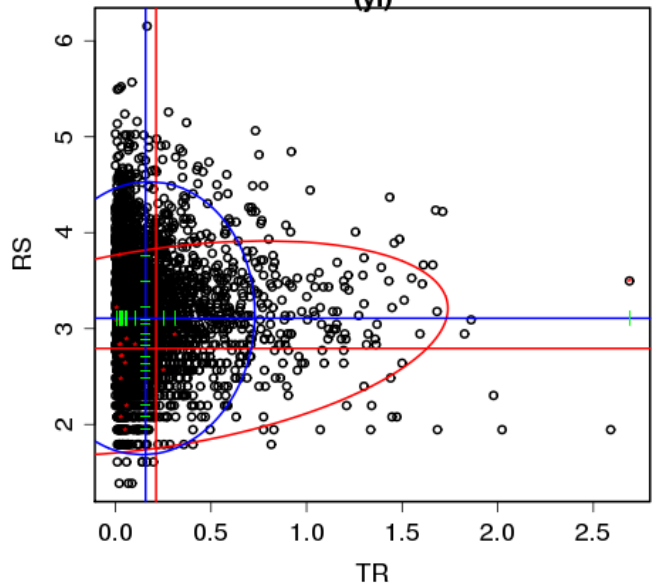

**GO:0000750**  
-dependent signal transduction during conjugation with  
(yl)

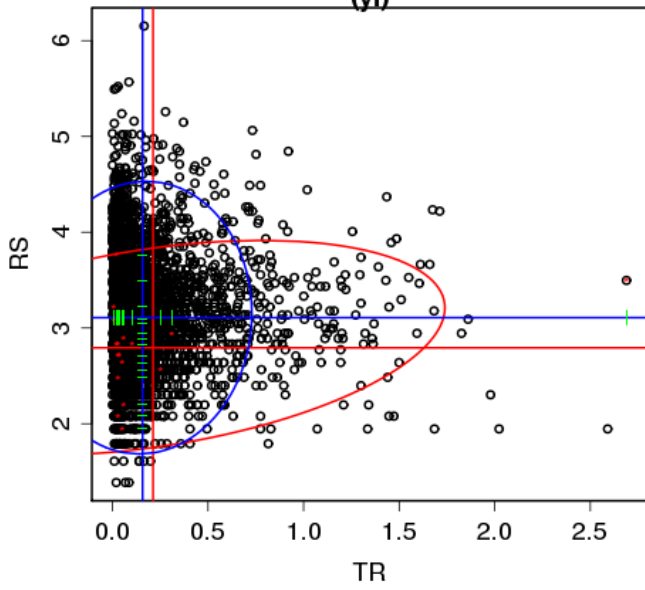

**GO:0006730**  
one-carbon compound metabolic process  
(yl)

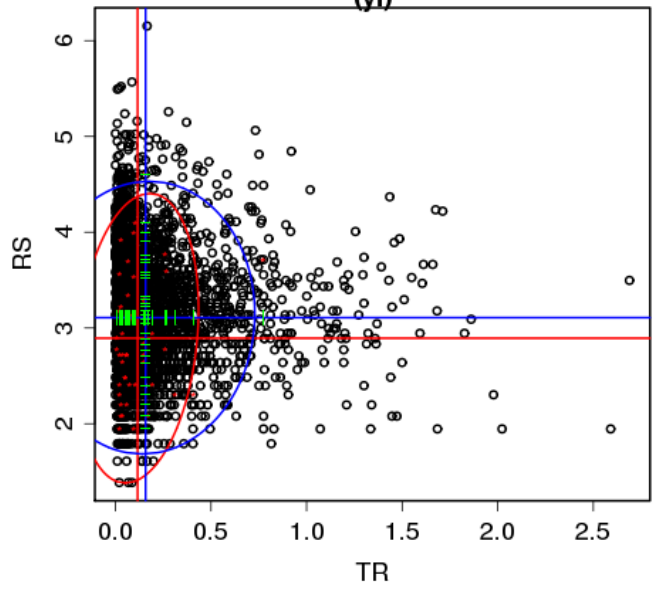

**GO:0000054**  
ribosome export from nucleus  
(yl)

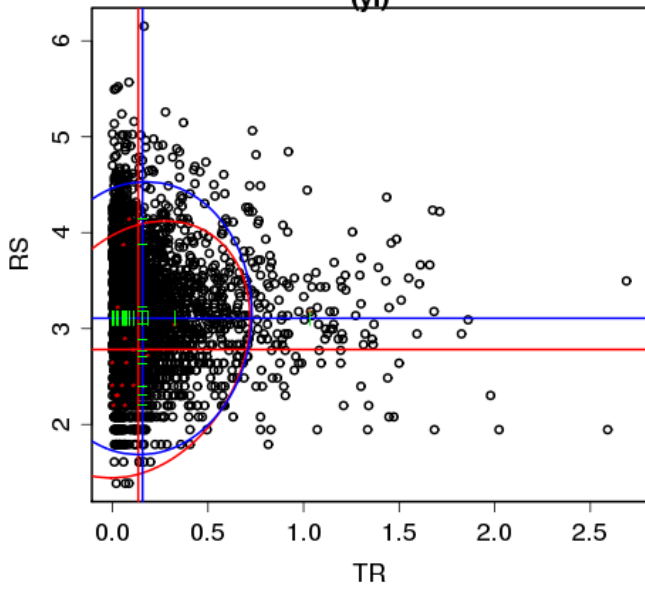

**GO:0033750**  
ribosome localization  
(yl)

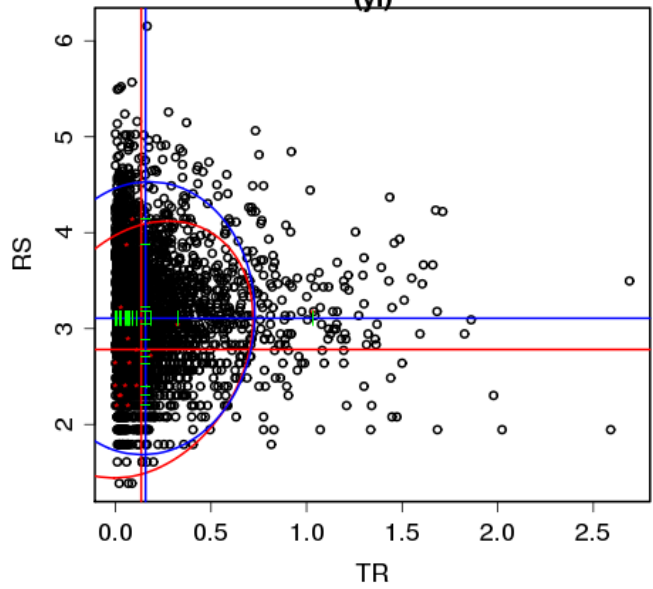

**GO:0033753**  
establishment of ribosome localization  
(yl)

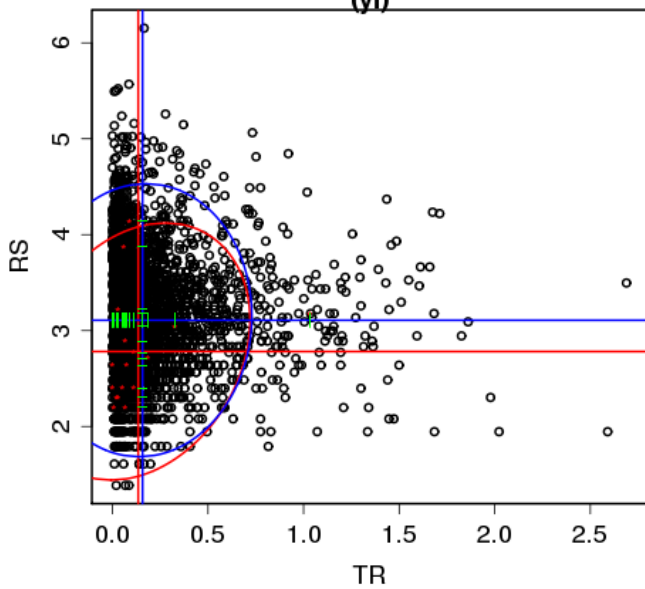

**GO:0006487**  
protein amino acid N-linked glycosylation  
(yl)

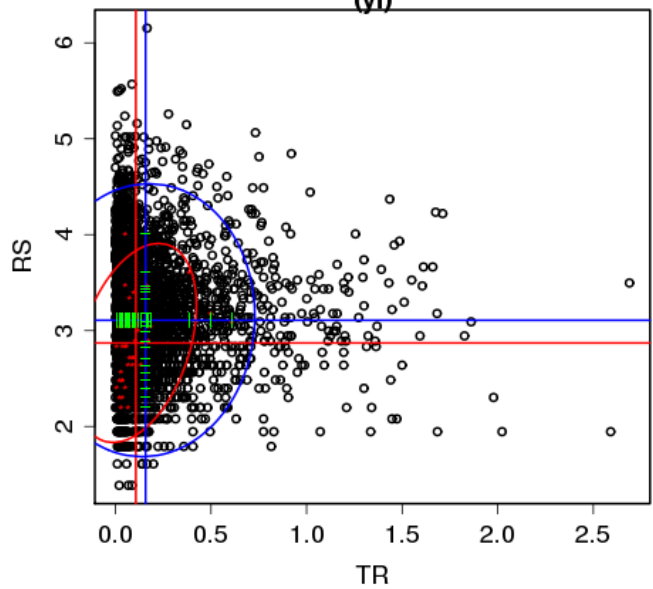

**GO:0032259**  
methylation  
(yl)

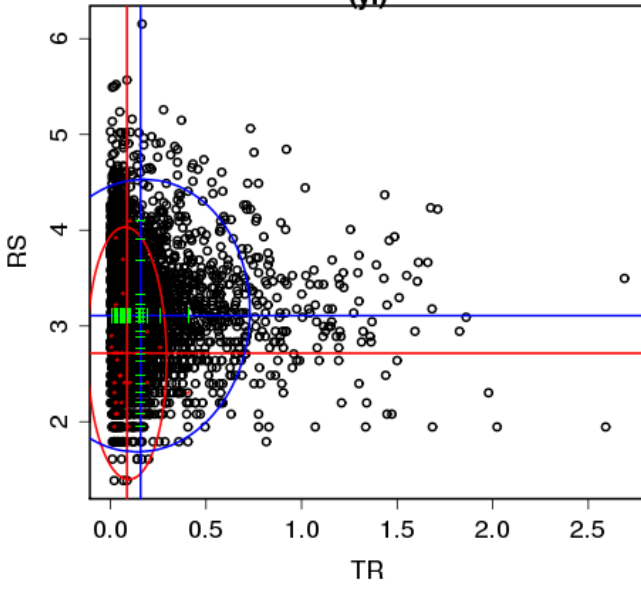

**GO:0043414**  
biopolymer methylation  
(yl)

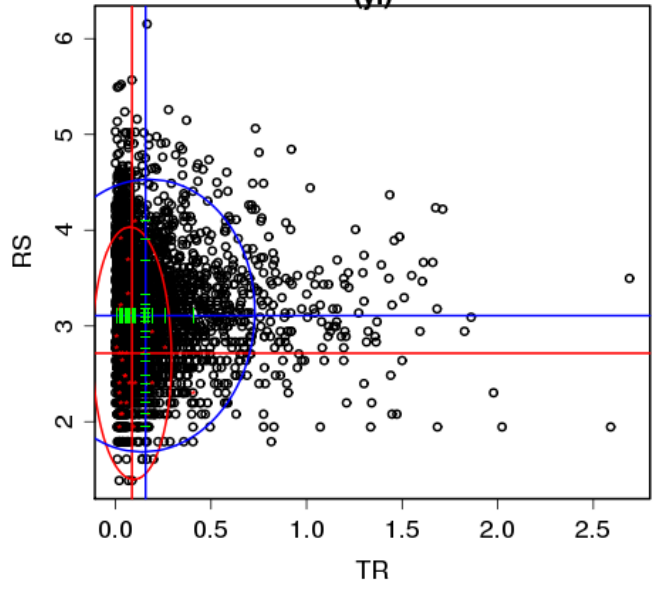

**GO:0006338**  
chromatin remodeling  
(yl)

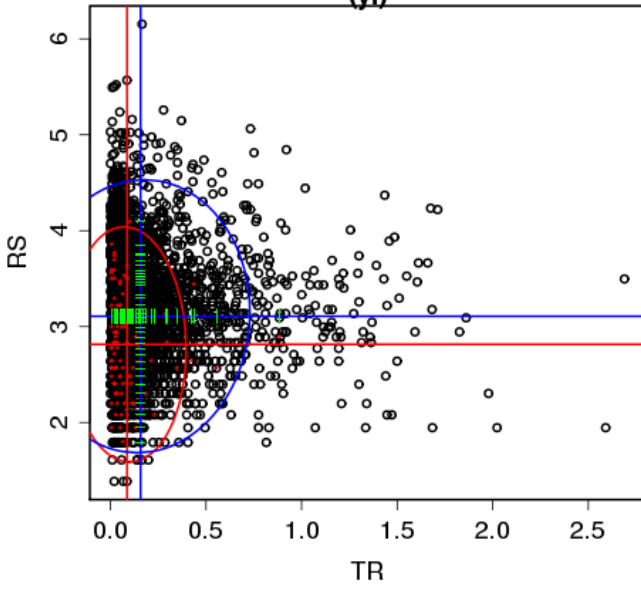

**GO:0040029**  
regulation of gene expression, epigenetic  
(yl)

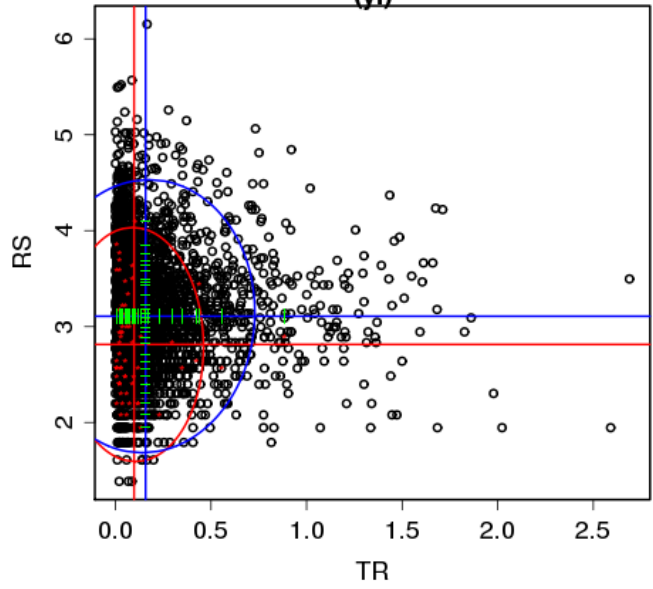

**GO:0048519**  
negative regulation of biological process  
(yl)

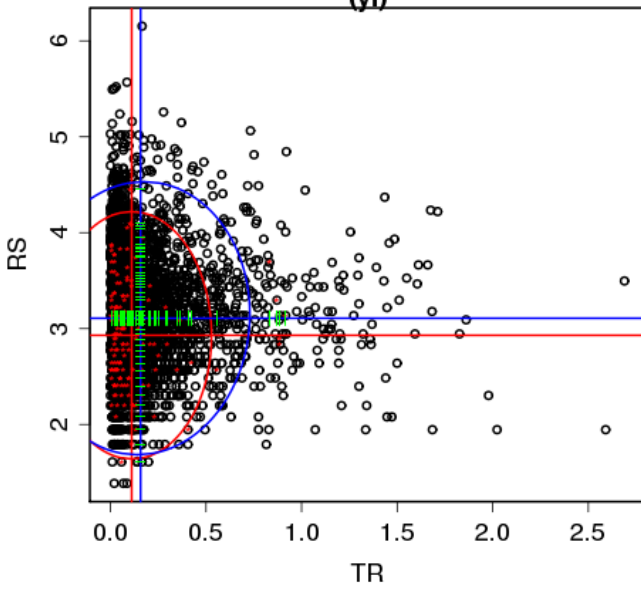

**GO:0048523**  
negative regulation of cellular process  
(yl)

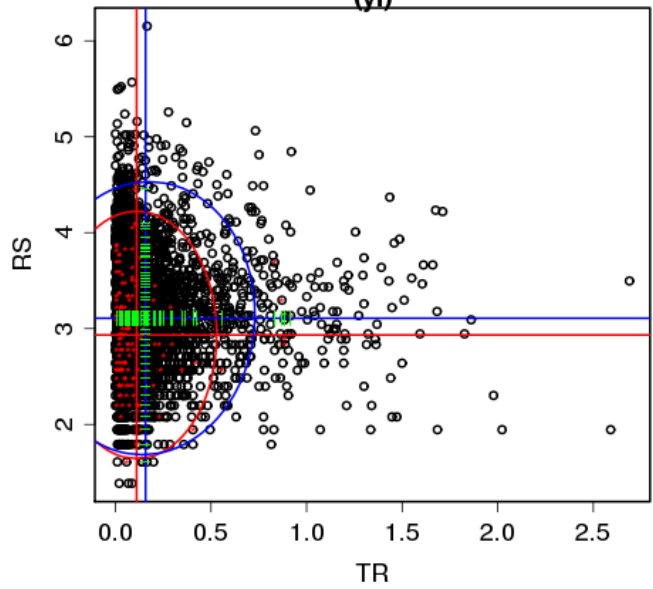

**GO:0006497**  
**protein amino acid lipidation**  
(yl)

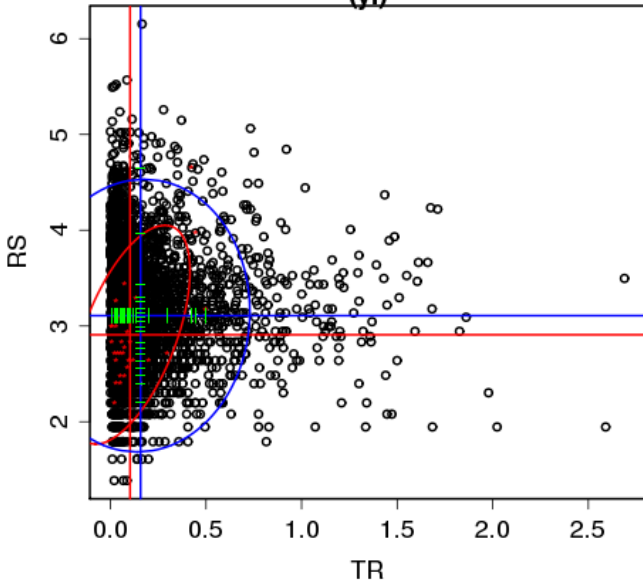

**GO:0042157**  
**lipoprotein metabolic process**  
(yl)

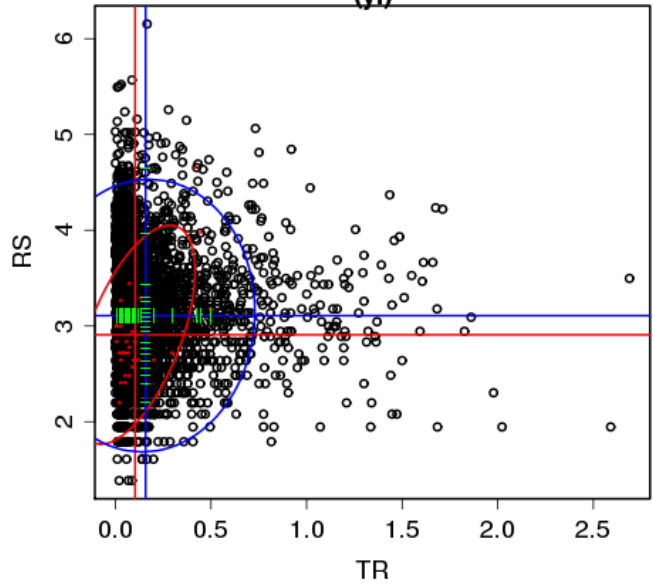

**GO:0042158**  
**lipoprotein biosynthetic process**  
(yl)

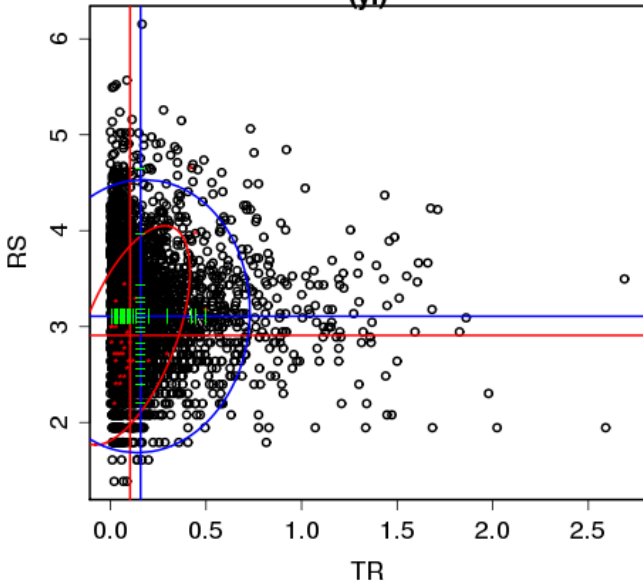

**GO:0042255**  
**ribosome assembly**  
(yl)

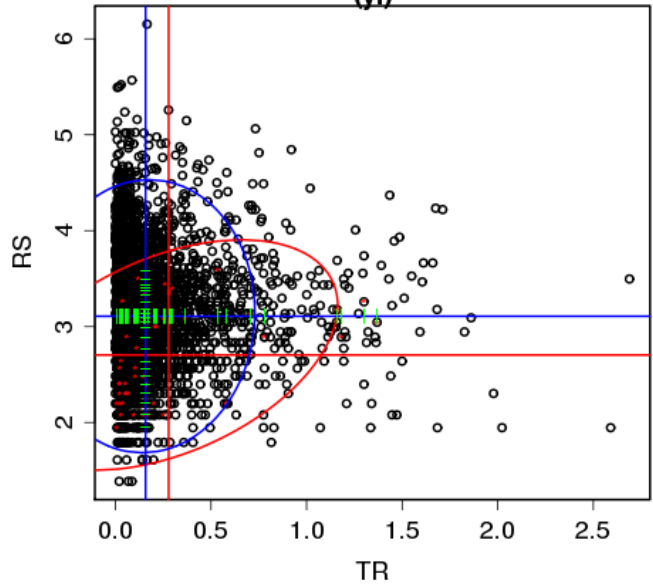

**GO:0042257**  
**ribosomal subunit assembly**  
(yl)

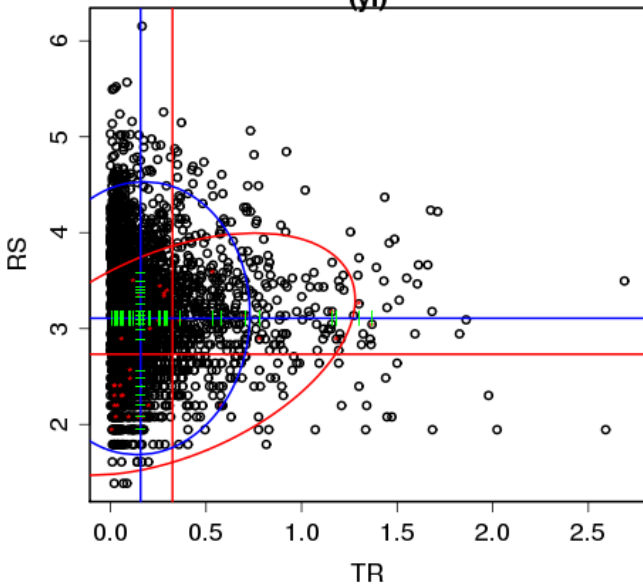

**GO:0007062**  
**sister chromatid cohesion**  
(yl)

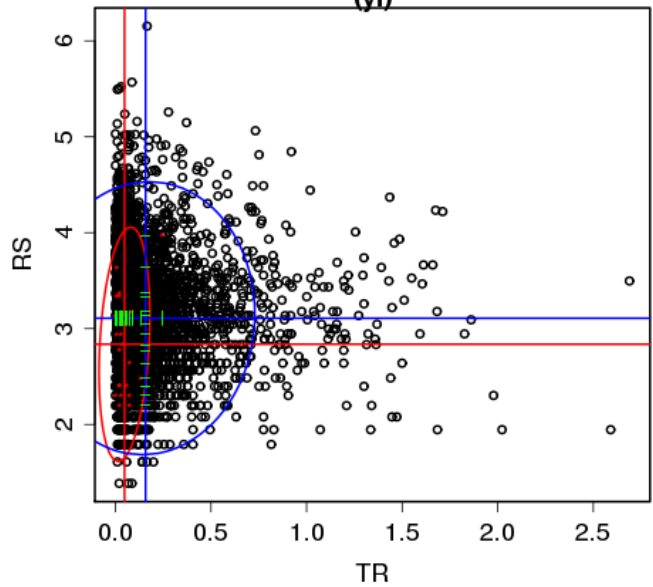

**GO:0042273**  
**ribosomal large subunit biogenesis**  
(yl)

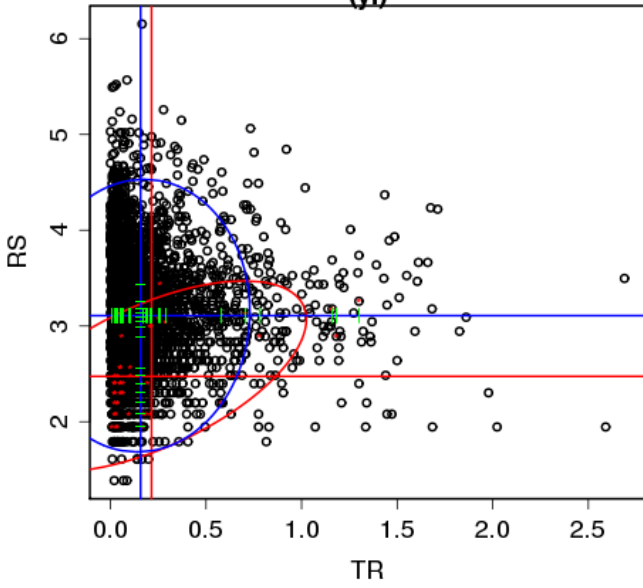

**GO:0007064**  
**mitotic sister chromatid cohesion**  
(yl)

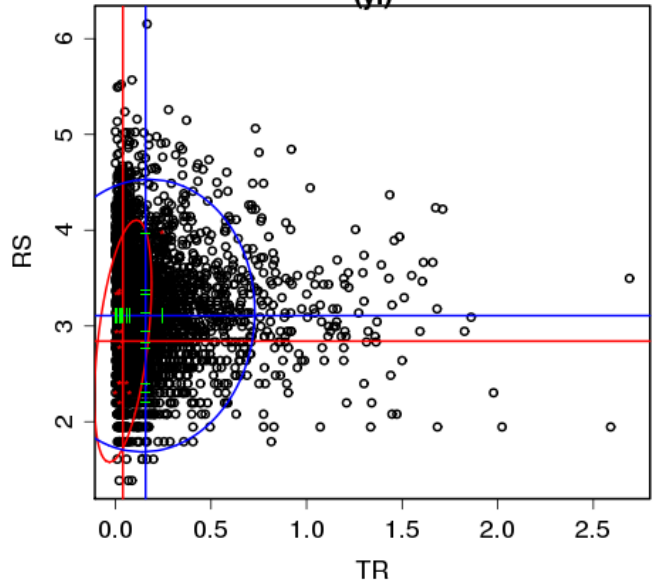

**GO:0050793**  
**regulation of developmental process**  
(yl)

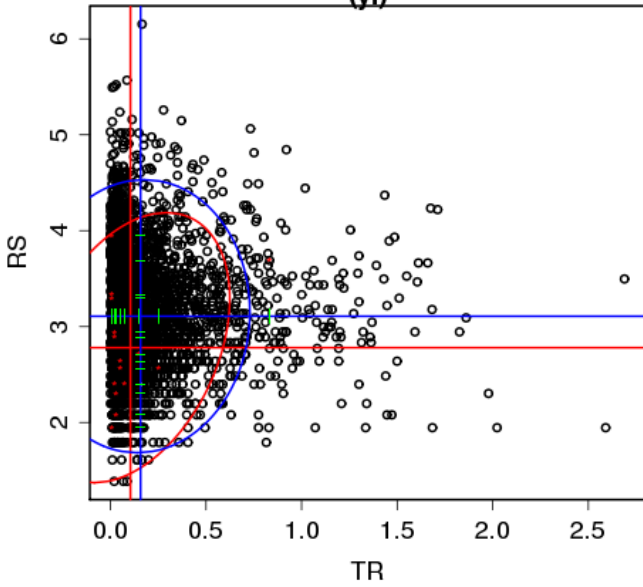

**GO:0000154**  
**rRNA modification**  
(yl)

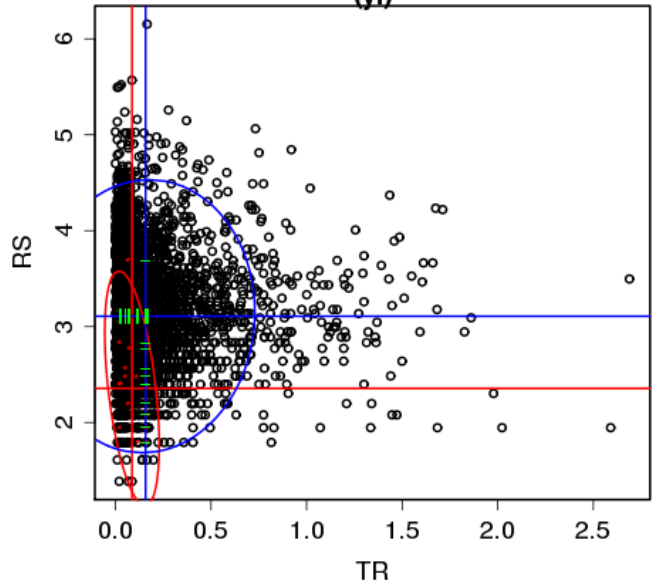

**GO:0030490**  
**maturation of SSU-rRNA**  
(yl)

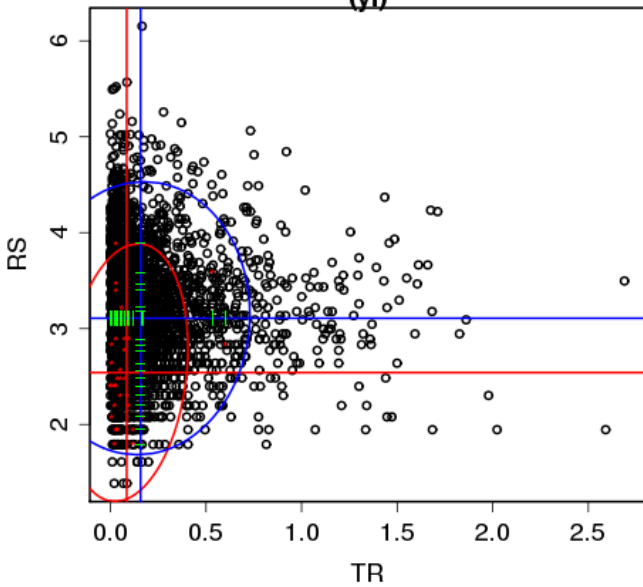

**GO:0000027**  
**ribosomal large subunit assembly and maintenance**  
(yl)

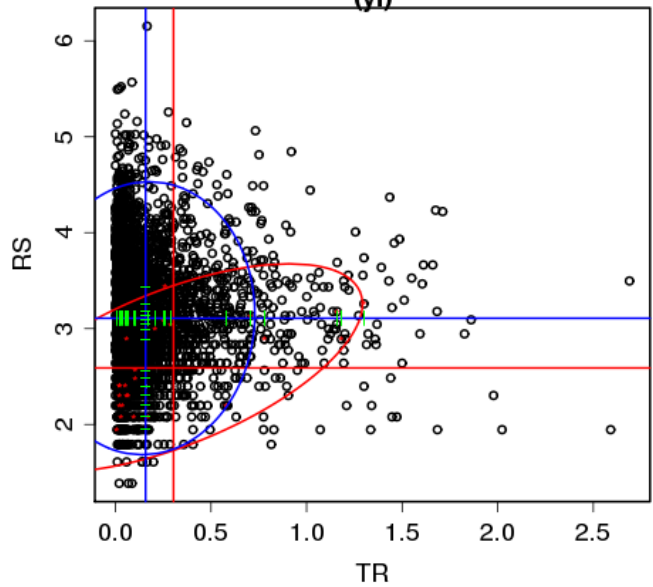

**GO:0043681**  
**protein import into mitochondrion**  
(yl)

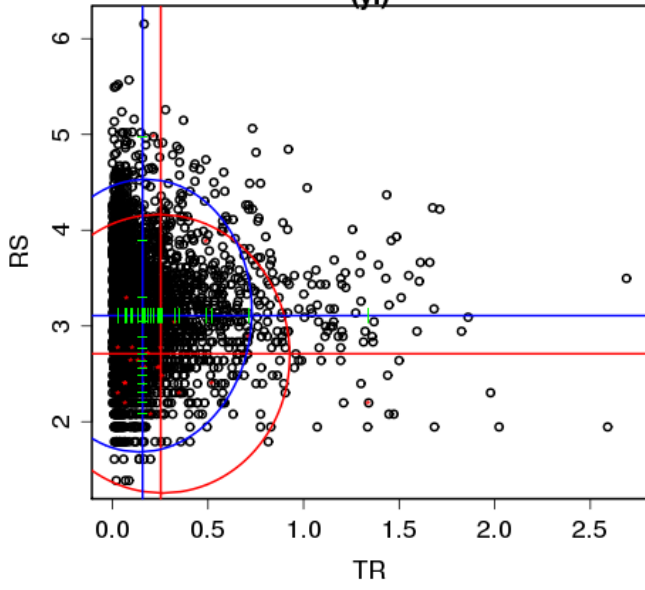

**GO:0000114**  
**G1-specific transcription in mitotic cell cycle**  
(yl)

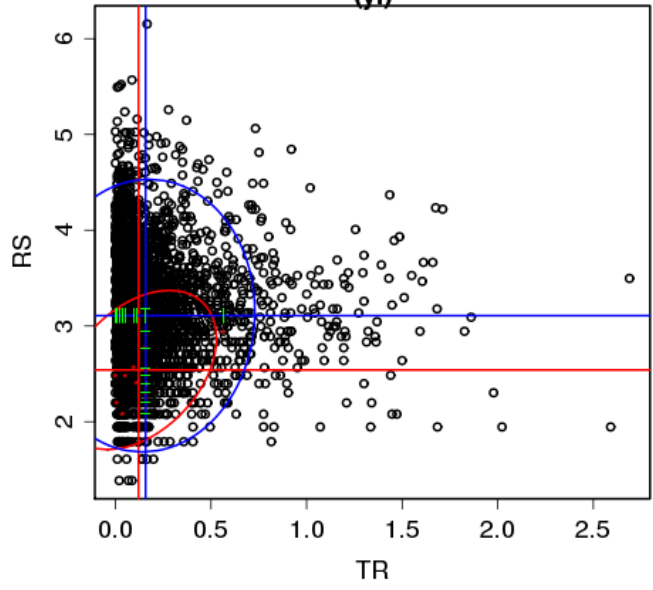

# Combined functional profiling of Transcription Rate (TR) and RNA Stability (RS) using KEGG pathways

13 significant modules

LOR indicates Log Odds Ratio of the coefficient or the interaction

p indicates FDR adjusted p-value

|          | LOR TR | LOR RS | LOR In-ter | p TR | p RS | p Inter | pattern | name                                      |
|----------|--------|--------|------------|------|------|---------|---------|-------------------------------------------|
| sce00010 | -0.48  | 1.70   | 0.44       | 0.97 | 0.00 | 1.00    | yh      | Glycolysis / Gluconeogenesis              |
| sce00500 | 3.80   | 1.77   | -1.31      | 0.97 | 0.00 | 1.00    | yh      | Starch and sucrose metabolism             |
| sce00052 | -2.36  | 1.49   | -0.06      | 0.97 | 0.00 | 1.00    | yh      | Galactose metabolism                      |
| sce00630 | 6.98   | 1.14   | -2.59      | 0.75 | 0.03 | 1.00    | yh      | Glyoxylate and dicarboxylate metabolism   |
| sce00030 | 0.27   | 0.96   | 0.08       | 0.97 | 0.04 | 1.00    | yh      | Pentose phosphate pathway                 |
| sce00020 | 4.71   | 1.28   | -1.44      | 0.75 | 0.00 | 1.00    | yh      | Citrate cycle (TCA cycle)                 |
| sce04130 | -0.35  | -1.72  | 0.29       | 0.97 | 0.01 | 1.00    | yl      | SNARE interactions in vesicular transport |
| sce04111 | -6.06  | -0.78  | 1.09       | 0.93 | 0.01 | 1.00    | yl      | Cell cycle                                |
| sce00230 | 1.32   | -0.97  | -0.24      | 0.97 | 0.00 | 1.00    | yl      | Purine metabolism                         |
| sce04011 | -5.61  | -1.38  | 1.91       | 0.91 | 0.00 | 1.00    | yl      | MAPK signaling pathway                    |
| sce00240 | 1.45   | -0.97  | -0.24      | 0.97 | 0.01 | 1.00    | yl      | Pyrimidine metabolism                     |
| sce03050 | 0.68   | -1.27  | 0.17       | 0.97 | 0.01 | 1.00    | yl      | Proteasome                                |
| sce03020 | 1.20   | -2.20  | -0.11      | 0.97 | 0.00 | 1.00    | yl      | RNA polymerase                            |

Table 1: LOR: log odds ratio; p: adjusted p-value FDR

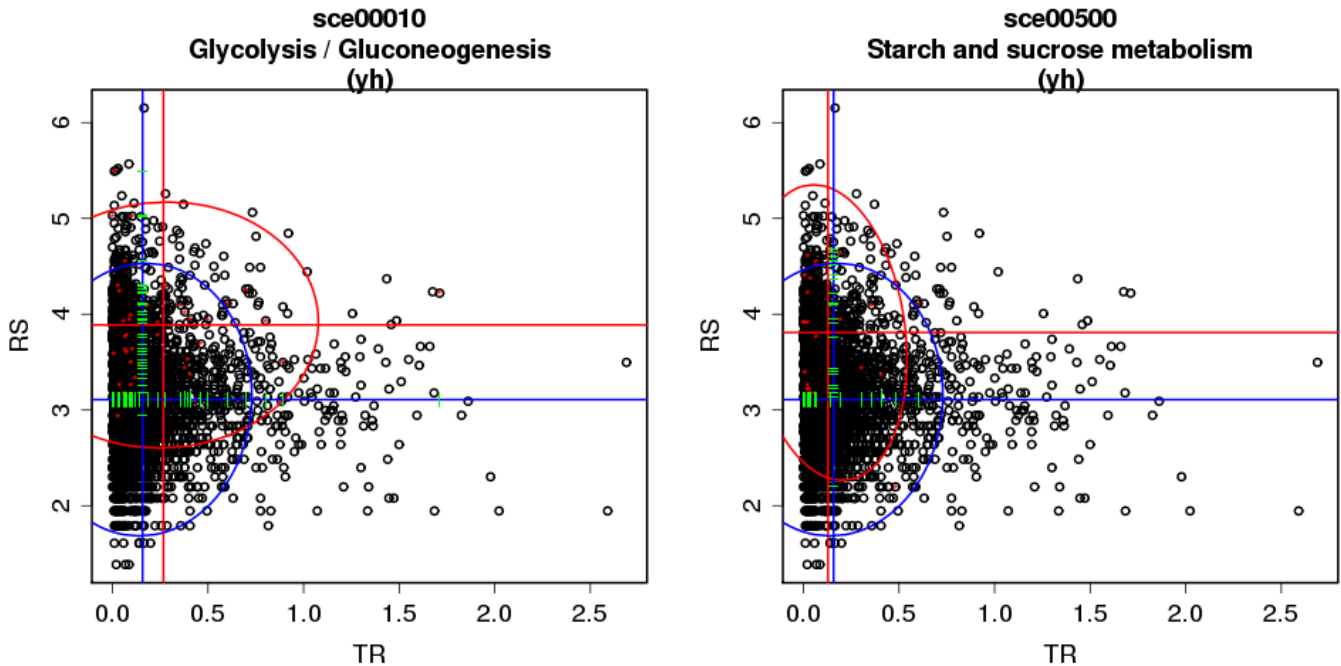



**sce00052**  
**Galactose metabolism**  
(yh)

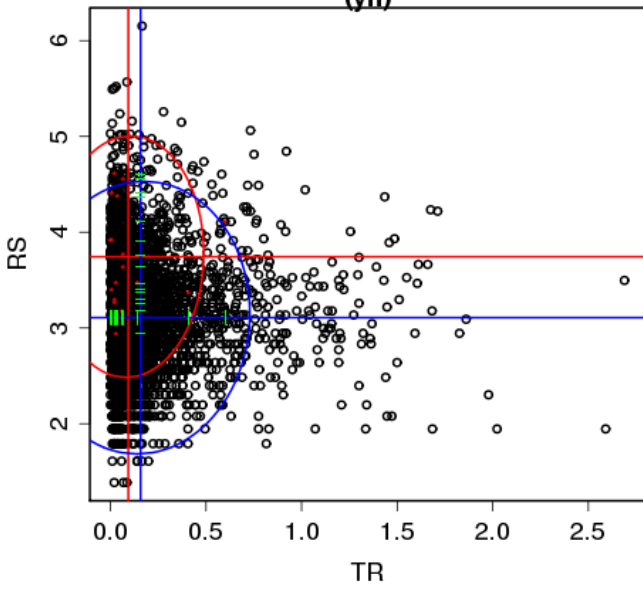

**sce00630**  
**Glyoxylate and dicarboxylate metabolism**  
(yh)

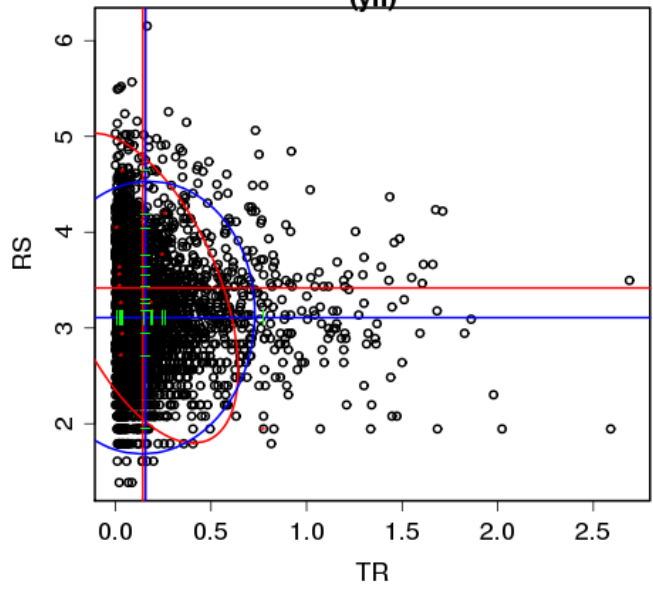

**sce00030**  
**Pentose phosphate pathway**  
(yh)

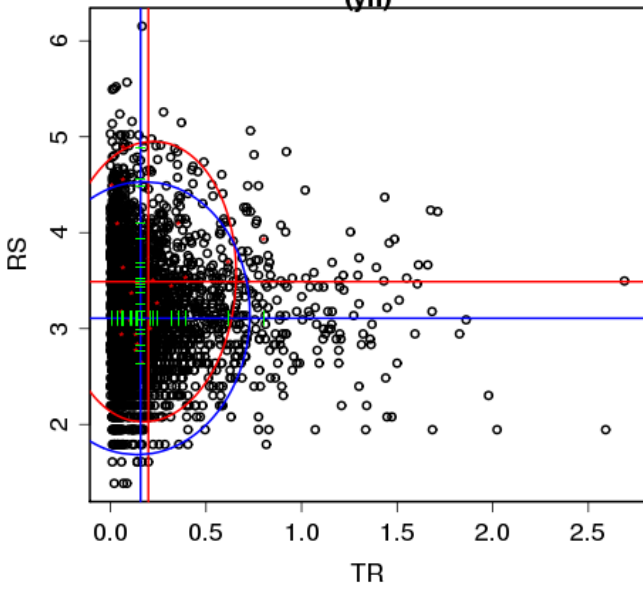

**sce00020**  
**Citrate cycle (TCA cycle)**  
(yh)

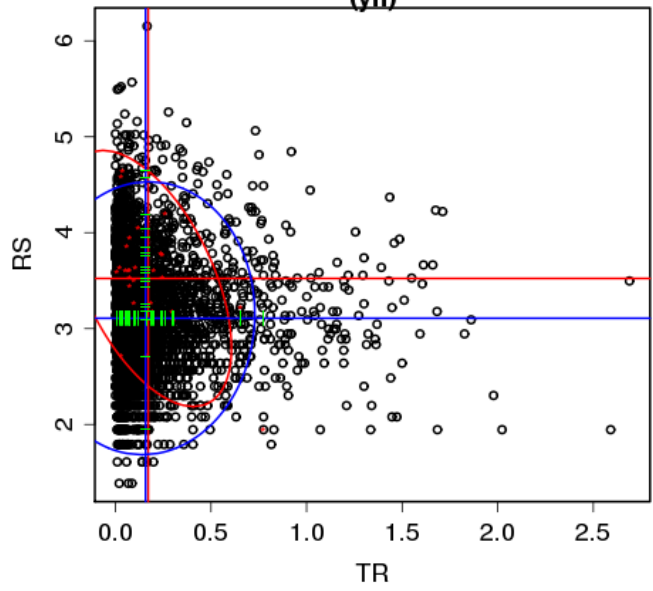

**sce04130**  
**SNARE interactions in vesicular transport**  
(yl)

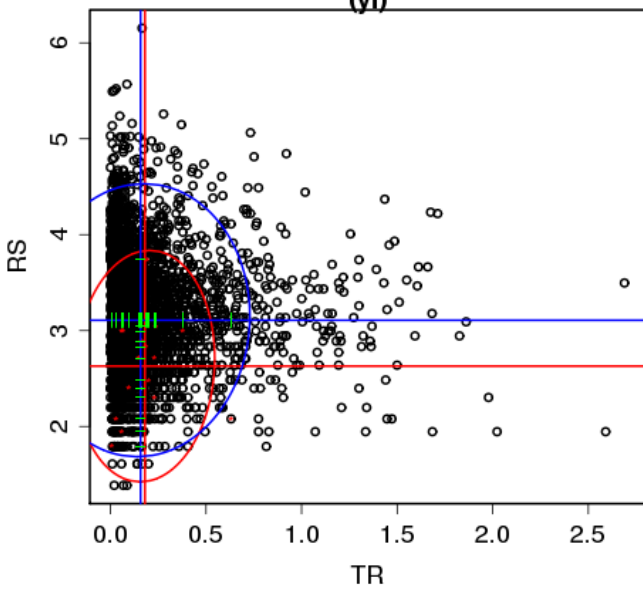

**sce04111**  
**Cell cycle**  
(yl)

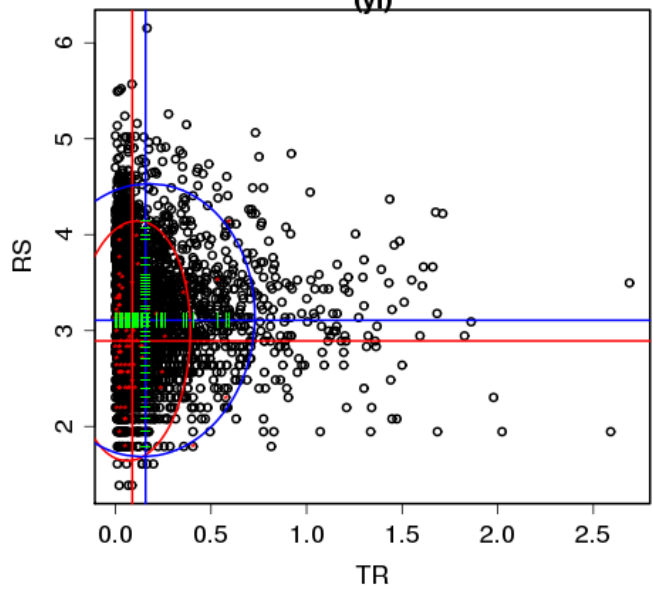



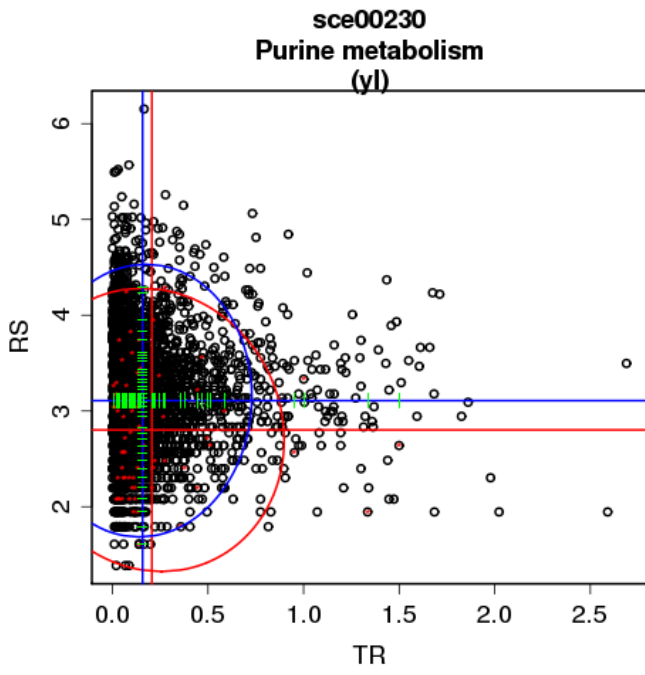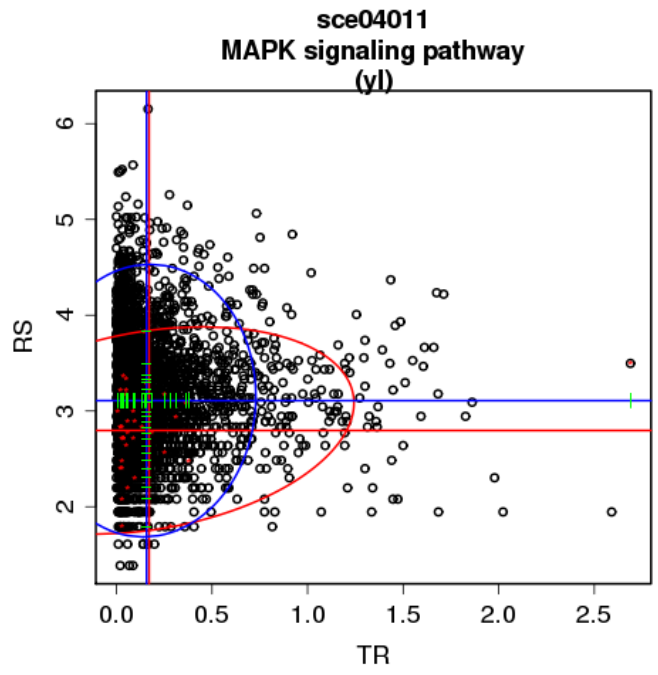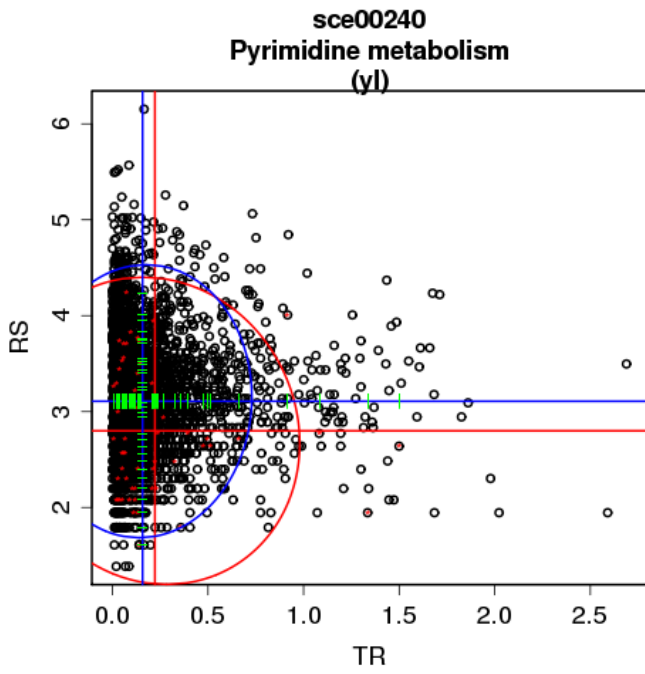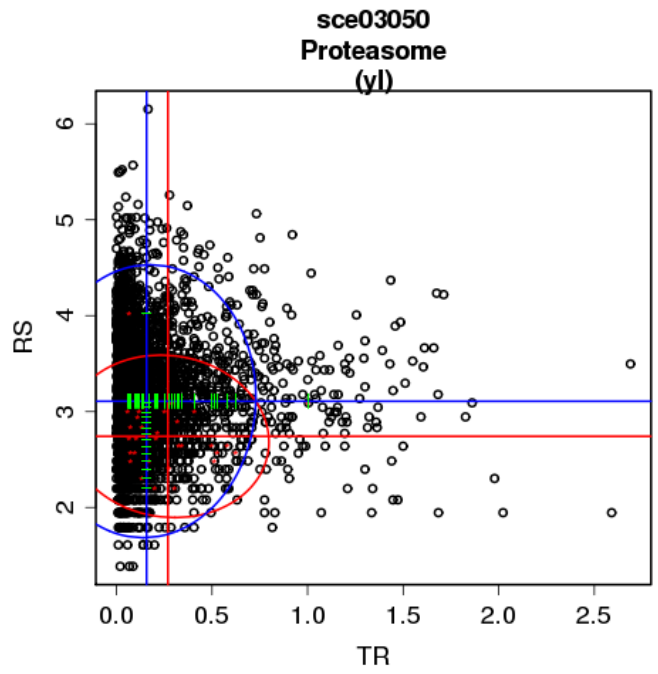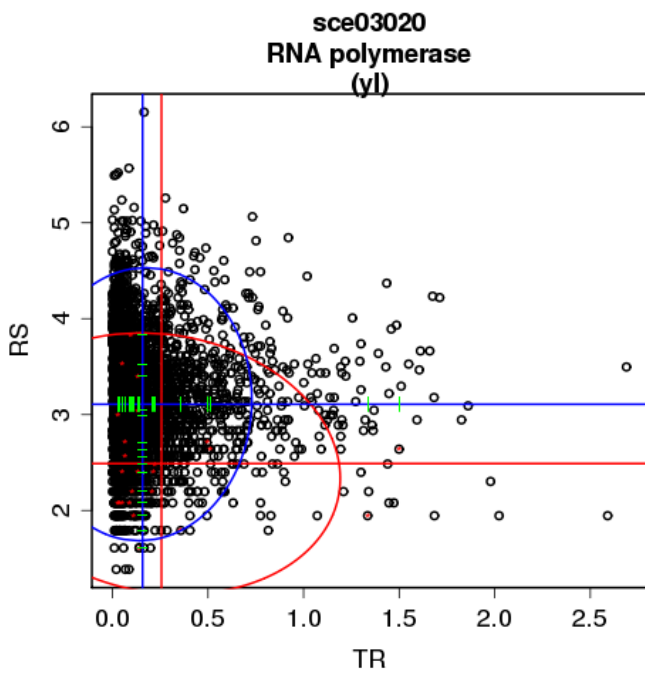

Supplement: pone.0010348.s007.pdf [file pone.0010348.s007.pdf]
