# Supplementary material for: Multidimensional Gene Set Analysis of Genomic Data
Source: PubMed Central journal article supplement (PMC2860497; doi:10.1371/journal.pone.0010348), 2010-04-27

# Combined functional profiling of alternative splicing and differential gene expression using GO Biological Process

154 significant modules

LOR indicates Log Odds Ratio of the coefficient or the interaction

p indicates FDR adjusted p-value

|            | LOR si | LOR dif | LOR In-ter | p si | p dif | p Inter | pattern | name                                                       |
|------------|--------|---------|------------|------|-------|---------|---------|------------------------------------------------------------|
| GO:0006767 | 0.15   | -0.15   | 0.14       | 1.00 | 0.61  | 0.04    | b13     | water-soluble vitamin metabolic process                    |
| GO:0045216 | 0.29   | -0.04   | 0.17       | 1.00 | 0.95  | 0.02    | b13     | cell-cell junction assembly and maintenance                |
| GO:0007043 | 0.38   | -0.03   | 0.18       | 1.00 | 0.97  | 0.02    | b13     | cell-cell junction assembly                                |
| GO:0048706 | 0.20   | 0.08    | 0.17       | 1.00 | 0.89  | 0.03    | b13     | embryonic skeletal development                             |
| GO:0007034 | 0.32   | -0.18   | 0.17       | 1.00 | 0.65  | 0.02    | b13     | vacuolar transport                                         |
| GO:0007041 | 0.32   | -0.10   | 0.18       | 1.00 | 0.86  | 0.01    | b13     | lysosomal transport                                        |
| GO:0048704 | 0.23   | 0.12    | 0.19       | 1.00 | 0.84  | 0.02    | b13     | embryonic skeletal morphogenesis                           |
| GO:0048705 | 0.17   | 0.10    | 0.17       | 1.00 | 0.85  | 0.02    | b13     | skeletal morphogenesis                                     |
| GO:0016197 | 0.08   | 0.10    | 0.15       | 1.00 | 0.79  | 0.02    | b13     | endosome transport                                         |
| GO:0030155 | 0.01   | -0.16   | -0.15      | 1.00 | 0.43  | 0.01    | b24     | regulation of cell adhesion                                |
| GO:0045785 | -0.04  | 0.06    | -0.18      | 1.00 | 0.94  | 0.02    | b24     | positive regulation of cell adhesion                       |
| GO:0030032 | -0.16  | -0.17   | -0.18      | 1.00 | 0.72  | 0.03    | b24     | lamellipodium biogenesis                                   |
| GO:0050792 | 0.65   | 0.27    | -0.05      | 0.01 | 0.61  | 1.00    | xh      | regulation of viral reproduction                           |
| GO:0001709 | 0.16   | 0.33    | -0.02      | 1.00 | 0.05  | 1.00    | yh      | cell fate determination                                    |
| GO:0019226 | 0.05   | 0.15    | -0.03      | 1.00 | 0.03  | 1.00    | yh      | transmission of nerve impulse                              |
| GO:0007416 | 0.32   | 0.34    | 0.01       | 0.89 | 0.02  | 1.00    | yh      | synaptogenesis                                             |
| GO:0065004 | -0.06  | 0.19    | 0.04       | 1.00 | 0.04  | 1.00    | yh      | protein-DNA complex assembly                               |
| GO:0006325 | -0.04  | 0.19    | 0.06       | 1.00 | 0.00  | 1.00    | yh      | establishment and/or maintenance of chromatin architecture |
| GO:0006333 | -0.08  | 0.21    | 0.06       | 1.00 | 0.01  | 1.00    | yh      | chromatin assembly or disassembly                          |
| GO:0008286 | -0.05  | 0.36    | 0.02       | 1.00 | 0.00  | 1.00    | yh      | insulin receptor signaling pathway                         |
| GO:0051648 | -0.16  | 0.41    | 0.05       | 1.00 | 0.02  | 1.00    | yh      | vesicle localization                                       |
| GO:0016339 | 0.09   | 0.37    | 0.06       | 1.00 | 0.03  | 1.00    | yh      | calcium-dependent cell-cell adhesion                       |
| GO:0030239 | 0.21   | 0.39    | -0.05      | 1.00 | 0.04  | 1.00    | yh      | myofibril assembly                                         |
| GO:0051146 | 0.18   | 0.36    | -0.02      | 1.00 | 0.02  | 1.00    | yh      | striated muscle cell differentiation                       |
| GO:0055002 | 0.21   | 0.39    | -0.05      | 1.00 | 0.04  | 1.00    | yh      | striated muscle cell development                           |
| GO:0048009 | -0.32  | 0.52    | 0.07       | 1.00 | 0.00  | 1.00    | yh      | insulin-like growth factor receptor signaling pathway      |
| GO:0000087 | 0.05   | -0.34   | 0.00       | 1.00 | 0.00  | 1.00    | yl      | M phase of mitotic cell cycle                              |
| GO:0000278 | 0.03   | -0.28   | 0.02       | 1.00 | 0.00  | 1.00    | yl      | mitotic cell cycle                                         |
| GO:0000279 | -0.02  | -0.30   | -0.01      | 1.00 | 0.00  | 1.00    | yl      | M phase                                                    |
| GO:0022402 | -0.00  | -0.23   | -0.01      | 1.00 | 0.00  | 1.00    | yl      | cell cycle process                                         |
| GO:0022403 | -0.02  | -0.23   | -0.00      | 1.00 | 0.00  | 1.00    | yl      | cell cycle phase                                           |
| GO:0006396 | -0.01  | -0.24   | 0.03       | 1.00 | 0.00  | 1.00    | yl      | RNA processing                                             |
| GO:0051301 | 0.09   | -0.21   | 0.06       | 1.00 | 0.02  | 1.00    | yl      | cell division                                              |
| GO:0007067 | 0.05   | -0.33   | -0.01      | 1.00 | 0.00  | 1.00    | yl      | mitosis                                                    |
| GO:0007599 | 0.12   | -0.28   | 0.01       | 1.00 | 0.00  | 1.00    | yl      | hemostasis                                                 |
| GO:0042060 | 0.09   | -0.29   | 0.03       | 1.00 | 0.00  | 1.00    | yl      | wound healing                                              |
| GO:0050817 | 0.13   | -0.26   | 0.00       | 1.00 | 0.01  | 1.00    | yl      | coagulation                                                |
| GO:0050878 | 0.09   | -0.26   | 0.00       | 1.00 | 0.01  | 1.00    | yl      | regulation of body fluid levels                            |
| GO:0007596 | 0.11   | -0.27   | 0.01       | 1.00 | 0.01  | 1.00    | yl      | blood coagulation                                          |
| GO:0046483 | 0.10   | -0.30   | 0.05       | 1.00 | 0.02  | 1.00    | yl      | heterocycle metabolic process                              |
| GO:0006457 | 0.07   | -0.27   | 0.04       | 1.00 | 0.00  | 1.00    | yl      | protein folding                                            |
| GO:0006118 | -0.04  | -0.15   | -0.05      | 1.00 | 0.01  | 1.00    | yl      |                                                            |
| GO:0006461 | 0.05   | -0.16   | 0.03       | 1.00 | 0.04  | 1.00    | yl      | protein complex assembly                                   |
| GO:0007088 | -0.01  | -0.37   | -0.08      | 1.00 | 0.04  | 1.00    | yl      | regulation of mitosis                                      |
| GO:0051726 | 0.06   | -0.22   | 0.02       | 1.00 | 0.00  | 1.00    | yl      | regulation of cell cycle                                   |
| GO:0007160 | -0.07  | -0.28   | -0.02      | 1.00 | 0.02  | 1.00    | yl      | cell-matrix adhesion                                       |
| GO:0031589 | -0.07  | -0.27   | -0.02      | 1.00 | 0.02  | 1.00    | yl      | cell-substrate adhesion                                    |
| GO:0019221 | 0.07   | -0.35   | -0.04      | 1.00 | 0.04  | 1.00    | yl      | cytokine and chemokine mediated signaling pathway          |
| GO:0008610 | 0.06   | -0.26   | -0.01      | 1.00 | 0.00  | 1.00    | yl      | lipid biosynthetic process                                 |
| GO:0006694 | 0.15   | -0.35   | 0.03       | 1.00 | 0.00  | 1.00    | yl      | steroid biosynthetic process                               |
| GO:0007398 | -0.01  | -0.53   | -0.03      | 1.00 | 0.00  | 1.00    | yl      | ectoderm development                                       |
| GO:0008544 | 0.04   | -0.51   | -0.03      | 1.00 | 0.00  | 1.00    | yl      | epidermis development                                      |
| GO:0009888 | -0.07  | -0.31   | -0.05      | 1.00 | 0.00  | 1.00    | yl      | tissue development                                         |
| GO:0009913 | 0.09   | -0.34   | -0.03      | 1.00 | 0.04  | 1.00    | yl      | epidermal cell differentiation                             |
| GO:0031424 | 0.05   | -0.38   | -0.03      | 1.00 | 0.03  | 1.00    | yl      | keratinization                                             |
| GO:0006399 | -0.00  | -0.30   | 0.01       | 1.00 | 0.00  | 1.00    | yl      | tRNA metabolic process                                     |
| GO:0006418 | -0.05  | -0.31   | -0.04      | 1.00 | 0.03  | 1.00    | yl      | tRNA aminoacylation for protein translation                |
| GO:0006519 | 0.02   | -0.17   | 0.04       | 1.00 | 0.02  | 1.00    | yl      | amino acid and derivative metabolic process                |
| GO:0006520 | -0.00  | -0.21   | 0.04       | 1.00 | 0.01  | 1.00    | yl      | amino acid metabolic process                               |
| GO:0043038 | -0.05  | -0.31   | -0.04      | 1.00 | 0.03  | 1.00    | yl      | amino acid activation                                      |
| GO:0043039 | -0.05  | -0.31   | -0.04      | 1.00 | 0.03  | 1.00    | yl      | tRNA aminoacylation                                        |
| GO:0065002 | 0.09   | -0.33   | 0.03       | 1.00 | 0.02  | 1.00    | yl      | intracellular protein transport across a membrane          |
| GO:0006096 | -0.21  | -0.34   | 0.00       | 1.00 | 0.02  | 1.00    | yl      | glycolysis                                                 |
| GO:0006954 | 0.12   | -0.17   | -0.04      | 0.89 | 0.03  | 1.00    | yl      | inflammatory response                                      |
| GO:0043623 | 0.02   | -0.34   | 0.01       | 1.00 | 0.01  | 1.00    | yl      | cellular protein complex assembly                          |
| GO:0043549 | 0.03   | -0.19   | -0.07      | 1.00 | 0.03  | 1.00    | yl      | regulation of kinase activity                              |
| GO:0051338 | 0.03   | -0.18   | -0.07      | 1.00 | 0.03  | 1.00    | yl      | regulation of transferase activity                         |
| GO:0045859 | 0.06   | -0.23   | -0.05      | 1.00 | 0.00  | 1.00    | yl      | regulation of protein kinase activity                      |
| GO:0009259 | -0.18  | -0.29   | 0.00       | 1.00 | 0.02  | 1.00    | yl      | ribonucleotide metabolic process                           |
| GO:0055086 | -0.08  | -0.18   | 0.03       | 1.00 | 0.05  | 1.00    | yl      | nucleobase, nucleoside and nucleotide metabolic process    |
| GO:0006732 | 0.01   | -0.31   | -0.01      | 1.00 | 0.00  | 1.00    | yl      | coenzyme metabolic process                                 |

|            |       |       |       |      |      |      |    |                                                                              |
|------------|-------|-------|-------|------|------|------|----|------------------------------------------------------------------------------|
| GO:0006752 | 0.10  | -0.44 | 0.04  | 1.00 | 0.04 | 1.00 | yl | group transfer coenzyme metabolic process                                    |
| GO:0009108 | 0.11  | -0.32 | 0.03  | 1.00 | 0.04 | 1.00 | yl | coenzyme biosynthetic process                                                |
| GO:0051186 | 0.03  | -0.24 | 0.01  | 1.00 | 0.01 | 1.00 | yl | cofactor metabolic process                                                   |
| GO:0051188 | 0.08  | -0.24 | 0.04  | 1.00 | 0.05 | 1.00 | yl | cofactor biosynthetic process                                                |
| GO:0006260 | -0.03 | -0.23 | 0.03  | 1.00 | 0.01 | 1.00 | yl | DNA replication                                                              |
| GO:0006917 | 0.02  | -0.23 | -0.04 | 1.00 | 0.01 | 1.00 | yl | induction of apoptosis                                                       |
| GO:0008629 | -0.06 | -0.47 | -0.04 | 1.00 | 0.00 | 1.00 | yl | induction of apoptosis by intracellular signals                              |
| GO:0012502 | 0.02  | -0.23 | -0.04 | 1.00 | 0.01 | 1.00 | yl | induction of programmed cell death                                           |
| GO:0042770 | -0.08 | -0.34 | -0.05 | 1.00 | 0.03 | 1.00 | yl | DNA damage response, signal transduction                                     |
| GO:0043065 | -0.01 | -0.20 | -0.03 | 1.00 | 0.02 | 1.00 | yl | positive regulation of apoptosis                                             |
| GO:0043068 | -0.01 | -0.19 | -0.03 | 1.00 | 0.02 | 1.00 | yl | positive regulation of programmed cell death                                 |
| GO:0008630 | -0.09 | -0.47 | -0.06 | 1.00 | 0.01 | 1.00 | yl | DNA damage response, signal transduction resulting in induction of apoptosis |
| GO:0016072 | -0.03 | -0.48 | 0.00  | 1.00 | 0.00 | 1.00 | yl | rRNA metabolic process                                                       |
| GO:0022613 | -0.05 | -0.34 | -0.00 | 1.00 | 0.00 | 1.00 | yl | ribonucleoprotein complex biogenesis and assembly                            |
| GO:0042254 | -0.03 | -0.49 | 0.00  | 1.00 | 0.00 | 1.00 | yl | ribosome biogenesis                                                          |
| GO:0006364 | -0.00 | -0.49 | 0.01  | 1.00 | 0.00 | 1.00 | yl | rRNA processing                                                              |
| GO:0001525 | 0.14  | -0.25 | -0.04 | 1.00 | 0.02 | 1.00 | yl | angiogenesis                                                                 |
| GO:0001568 | 0.15  | -0.20 | -0.03 | 0.89 | 0.04 | 1.00 | yl | blood vessel development                                                     |
| GO:0001944 | 0.14  | -0.22 | -0.02 | 1.00 | 0.02 | 1.00 | yl | vasculature development                                                      |
| GO:0048514 | 0.16  | -0.21 | -0.04 | 0.90 | 0.04 | 1.00 | yl | blood vessel morphogenesis                                                   |
| GO:0048646 | 0.14  | -0.21 | -0.03 | 1.00 | 0.04 | 1.00 | yl | anatomical structure formation                                               |
| GO:0007005 | -0.04 | -0.40 | -0.03 | 1.00 | 0.00 | 1.00 | yl | mitochondrion organization and biogenesis                                    |
| GO:0033002 | 0.23  | -0.47 | 0.05  | 1.00 | 0.02 | 1.00 | yl | muscle cell proliferation                                                    |
| GO:0048659 | 0.31  | -0.56 | 0.07  | 1.00 | 0.00 | 1.00 | yl | smooth muscle cell proliferation                                             |
| GO:0048660 | 0.27  | -0.58 | 0.06  | 1.00 | 0.00 | 1.00 | yl | regulation of smooth muscle cell proliferation                               |
| GO:0006626 | 0.02  | -0.57 | 0.01  | 1.00 | 0.00 | 1.00 | yl | protein targeting to mitochondrion                                           |
| GO:0001523 | 0.12  | -0.54 | 0.01  | 1.00 | 0.02 | 1.00 | yl | retinoid metabolic process                                                   |
| GO:0006720 | -0.04 | -0.56 | -0.02 | 1.00 | 0.00 | 1.00 | yl | isoprenoid metabolic process                                                 |
| GO:0006775 | -0.12 | -0.46 | -0.05 | 1.00 | 0.02 | 1.00 | yl | fat-soluble vitamin metabolic process                                        |
| GO:0006776 | -0.09 | -0.55 | -0.03 | 1.00 | 0.00 | 1.00 | yl | vitamin A metabolic process                                                  |
| GO:0016101 | 0.12  | -0.54 | 0.01  | 1.00 | 0.02 | 1.00 | yl | diterpenoid metabolic process                                                |
| GO:0006119 | -0.01 | -0.27 | 0.01  | 1.00 | 0.02 | 1.00 | yl | oxidative phosphorylation                                                    |
| GO:0042773 | 0.14  | -0.36 | 0.04  | 1.00 | 0.01 | 1.00 | yl | ATP synthesis coupled electron transport                                     |
| GO:0042775 | 0.05  | -0.37 | 0.03  | 1.00 | 0.01 | 1.00 | yl | organelle ATP synthesis coupled electron transport                           |
| GO:0006120 | 0.06  | -0.38 | 0.04  | 1.00 | 0.01 | 1.00 | yl | mitochondrial electron transport, NADH to ubiquinone                         |
| GO:0000226 | -0.02 | -0.31 | 0.01  | 1.00 | 0.00 | 1.00 | yl | microtubule cytoskeleton organization and biogenesis                         |
| GO:0006084 | -0.08 | -0.45 | -0.04 | 1.00 | 0.00 | 1.00 | yl | acetyl-CoA metabolic process                                                 |
| GO:0009060 | 0.03  | -0.44 | -0.01 | 1.00 | 0.00 | 1.00 | yl | aerobic respiration                                                          |
| GO:0009109 | 0.04  | -0.52 | 0.00  | 1.00 | 0.00 | 1.00 | yl | coenzyme catabolic process                                                   |
| GO:0045333 | -0.00 | -0.40 | -0.04 | 1.00 | 0.01 | 1.00 | yl | cellular respiration                                                         |
| GO:0046356 | 0.06  | -0.49 | -0.00 | 1.00 | 0.00 | 1.00 | yl | acetyl-CoA catabolic process                                                 |
| GO:0051187 | 0.06  | -0.46 | 0.01  | 1.00 | 0.00 | 1.00 | yl | cofactor catabolic process                                                   |
| GO:0006099 | 0.06  | -0.49 | -0.00 | 1.00 | 0.00 | 1.00 | yl | tricarboxylic acid cycle                                                     |
| GO:0000070 | 0.08  | -0.42 | 0.05  | 1.00 | 0.03 | 1.00 | yl | mitotic sister chromatid segregation                                         |
| GO:0000819 | 0.09  | -0.40 | 0.05  | 1.00 | 0.04 | 1.00 | yl | sister chromatid segregation                                                 |
| GO:0007059 | 0.02  | -0.32 | 0.06  | 1.00 | 0.04 | 1.00 | yl | chromosome segregation                                                       |
| GO:0008284 | -0.04 | -0.19 | -0.04 | 1.00 | 0.02 | 1.00 | yl | positive regulation of cell proliferation                                    |
| GO:0030031 | -0.08 | -0.32 | -0.08 | 1.00 | 0.02 | 1.00 | yl | cell projection biogenesis                                                   |
| GO:0033673 | -0.02 | -0.37 | -0.03 | 1.00 | 0.00 | 1.00 | yl | negative regulation of kinase activity                                       |
| GO:0043086 | -0.10 | -0.29 | -0.05 | 1.00 | 0.02 | 1.00 | yl | negative regulation of catalytic activity                                    |
| GO:0051348 | -0.02 | -0.36 | -0.03 | 1.00 | 0.01 | 1.00 | yl | negative regulation of transferase activity                                  |
| GO:0006469 | -0.02 | -0.37 | -0.03 | 1.00 | 0.00 | 1.00 | yl | negative regulation of protein kinase activity                               |
| GO:0043405 | 0.06  | -0.26 | -0.05 | 1.00 | 0.05 | 1.00 | yl | regulation of MAP kinase activity                                            |
| GO:0009123 | -0.23 | -0.43 | 0.00  | 1.00 | 0.04 | 1.00 | yl | nucleoside monophosphate metabolic process                                   |
| GO:0009124 | -0.23 | -0.43 | 0.00  | 1.00 | 0.04 | 1.00 | yl | nucleoside monophosphate biosynthetic process                                |
| GO:0051052 | 0.01  | -0.30 | 0.02  | 1.00 | 0.05 | 1.00 | yl | regulation of DNA metabolic process                                          |
| GO:0042330 | 0.16  | -0.30 | -0.04 | 0.90 | 0.00 | 1.00 | yl | taxis                                                                        |
| GO:0006935 | 0.16  | -0.30 | -0.04 | 0.90 | 0.00 | 1.00 | yl | chemotaxis                                                                   |
| GO:0018149 | 0.14  | -0.55 | -0.03 | 1.00 | 0.00 | 1.00 | yl | peptide cross-linking                                                        |
| GO:0030216 | -0.15 | -0.70 | -0.08 | 1.00 | 0.00 | 1.00 | yl | keratinocyte differentiation                                                 |
| GO:0000079 | -0.04 | -0.39 | -0.05 | 1.00 | 0.01 | 1.00 | yl | regulation of cyclin-dependent protein kinase activity                       |
| GO:0006100 | -0.13 | -0.63 | -0.02 | 1.00 | 0.00 | 1.00 | yl | protein import into nucleus, docking                                         |
| GO:0000059 | -0.02 | -0.52 | 0.01  | 1.00 | 0.00 | 1.00 | yl | regeneration                                                                 |
| GO:0031099 | -0.24 | -0.47 | 0.02  | 1.00 | 0.02 | 1.00 | yl | microtubule polymerization or depolymerization                               |
| GO:0006695 | -0.18 | -0.50 | -0.02 | 1.00 | 0.00 | 1.00 | yl | cholesterol biosynthetic process                                             |
| GO:0016126 | -0.11 | -0.50 | -0.01 | 1.00 | 0.00 | 1.00 | yl | sterol biosynthetic process                                                  |
| GO:0001836 | -0.29 | -0.51 | -0.12 | 1.00 | 0.02 | 1.00 | yl | release of cytochrome c from mitochondria                                    |
| GO:0046112 | -0.12 | -0.54 | -0.01 | 1.00 | 0.03 | 1.00 | yl | nucleobase biosynthetic process                                              |
| GO:0006690 | -0.04 | -0.38 | -0.06 | 1.00 | 0.02 | 1.00 | yl | icosanoid metabolic process                                                  |
| GO:0009166 | -0.05 | -0.54 | -0.01 | 1.00 | 0.00 | 1.00 | yl | nucleotide catabolic process                                                 |
| GO:0006633 | -0.06 | -0.33 | -0.06 | 1.00 | 0.01 | 1.00 | yl | fatty acid biosynthetic process                                              |
| GO:0032886 | -0.06 | -0.41 | -0.03 | 1.00 | 0.04 | 1.00 | yl | regulation of microtubule-based process                                      |
| GO:0051346 | -0.30 | -0.57 | -0.14 | 1.00 | 0.00 | 1.00 | yl | negative regulation of hydrolase activity                                    |
| GO:0008299 | -0.17 | -0.60 | -0.05 | 1.00 | 0.00 | 1.00 | yl | isoprenoid biosynthetic process                                              |
| GO:0001937 | -0.21 | -0.53 | -0.07 | 1.00 | 0.03 | 1.00 | yl | negative regulation of endothelial cell proliferation                        |
| GO:0007250 | 0.15  | -0.51 | -0.07 | 1.00 | 0.03 | 1.00 | yl | activation of NF-kappaB-inducing kinase activity                             |
| GO:0032602 | -0.06 | -0.51 | -0.12 | 1.00 | 0.05 | 1.00 | yl | chemokine production                                                         |
| GO:0050755 | -0.08 | -0.57 | -0.12 | 1.00 | 0.01 | 1.00 | yl | chemokine metabolic process                                                  |
| GO:0042033 | -0.08 | -0.57 | -0.12 | 1.00 | 0.01 | 1.00 | yl | chemokine biosynthetic process                                               |
| GO:0022408 | -0.13 | -0.54 | -0.06 | 1.00 | 0.03 | 1.00 | yl | negative regulation of cell-cell adhesion                                    |
| GO:0045428 | 0.28  | -0.53 | 0.04  | 1.00 | 0.02 | 1.00 | yl | regulation of nitric oxide biosynthetic process                              |
| GO:0043407 | -0.17 | -0.43 | -0.02 | 1.00 | 0.02 | 1.00 | yl | negative regulation of MAP kinase activity                                   |

Table 1: LOR: log odds ratio; p: adjusted p-value FDR

**GO:0006767**  
**water-soluble vitamin metabolic process**  
**(b13)**

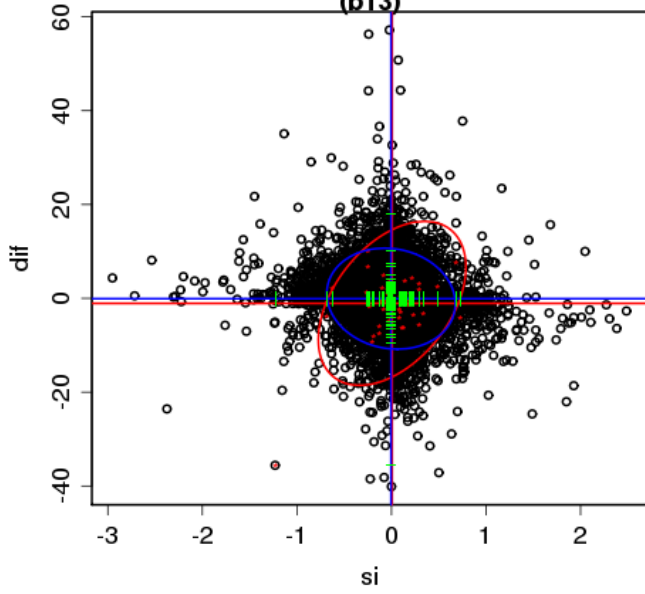

**GO:0045216**  
**cell-cell junction assembly and maintenance**  
**(b13)**

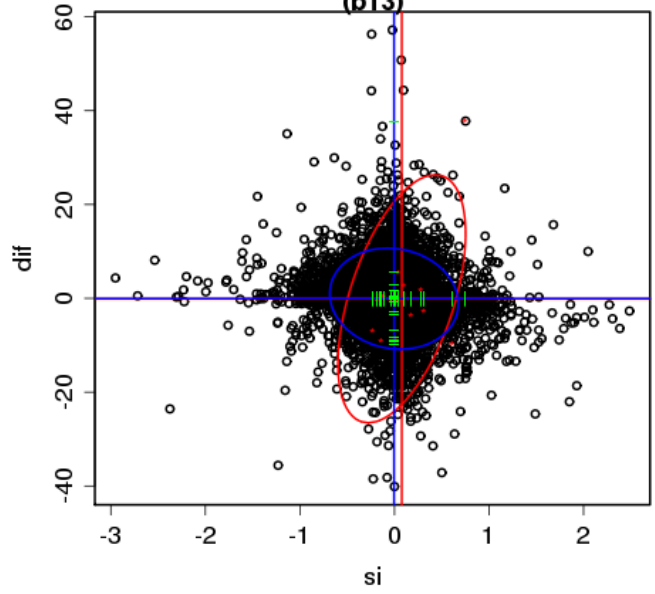

**GO:0007043**  
**cell-cell junction assembly**  
**(b13)**

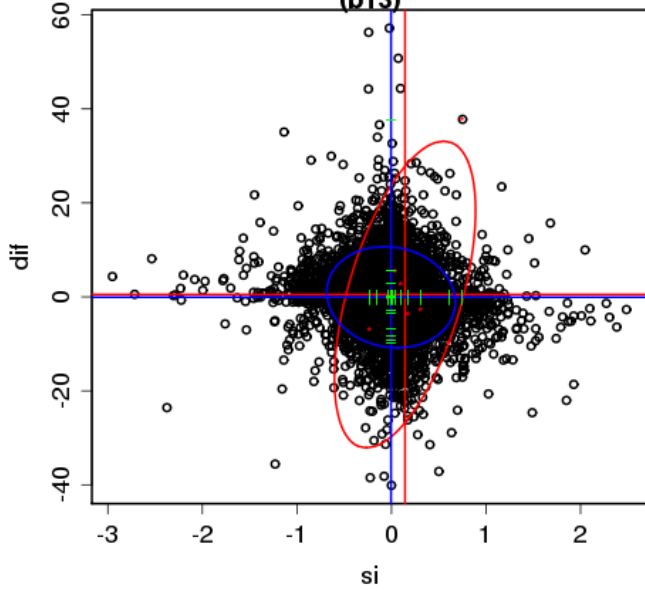

**GO:0048706**  
**embryonic skeletal development**  
**(b13)**

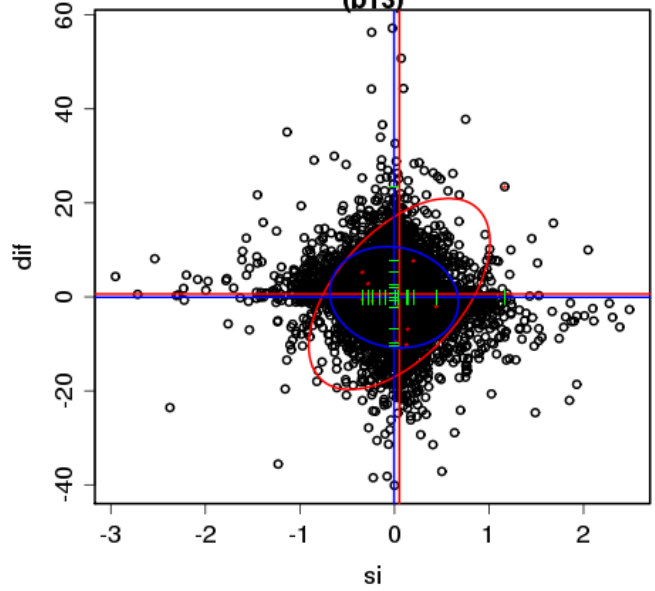

**GO:0007034**  
**vacuolar transport**  
**(b13)**

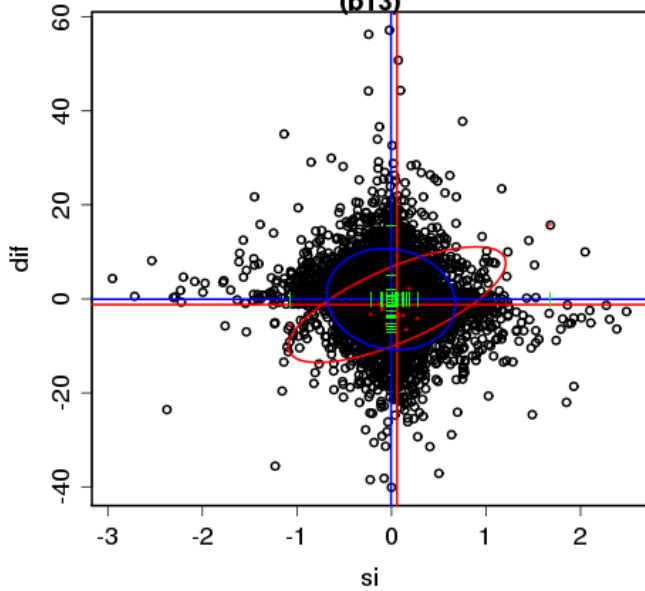

**GO:0007041**  
**lysosomal transport**  
**(b13)**

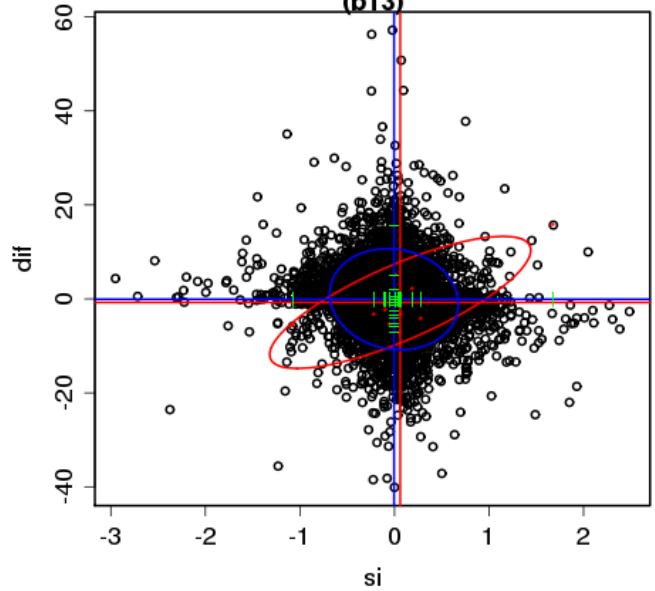

**GO:0048704**  
**embryonic skeletal morphogenesis**  
**(b13)**

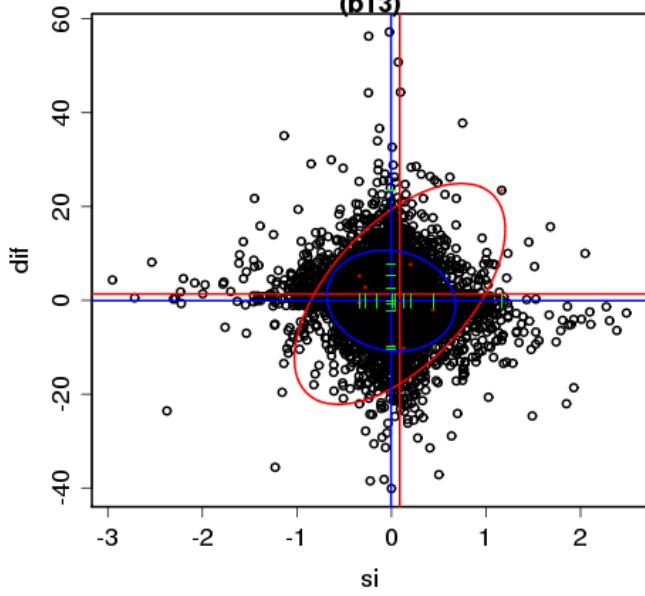

**GO:0048705**  
**skeletal morphogenesis**  
**(b13)**

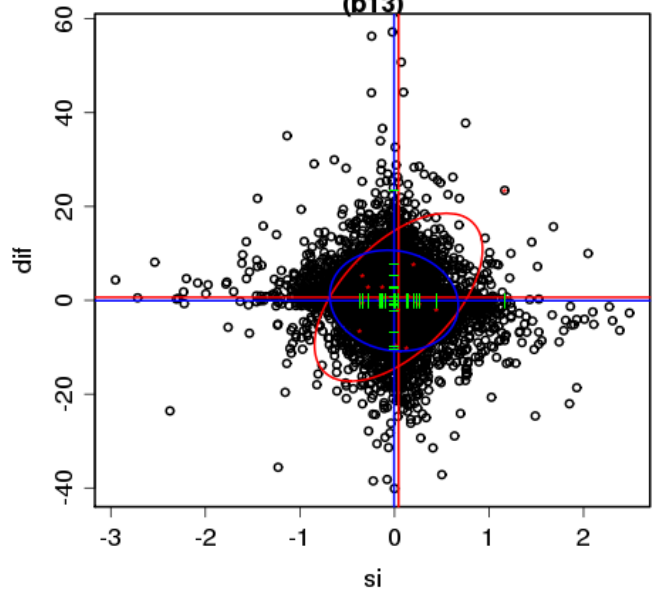

**GO:0016197**  
**endosome transport**  
**(b13)**

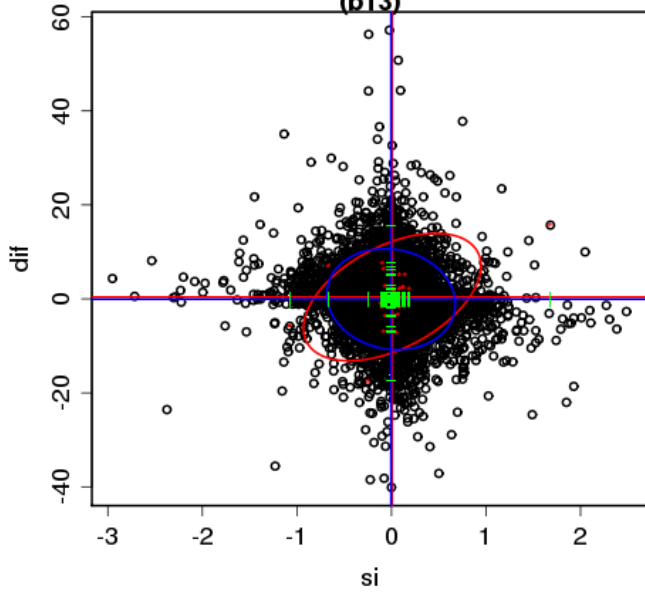

**GO:0030155**  
**regulation of cell adhesion**  
**(b24)**

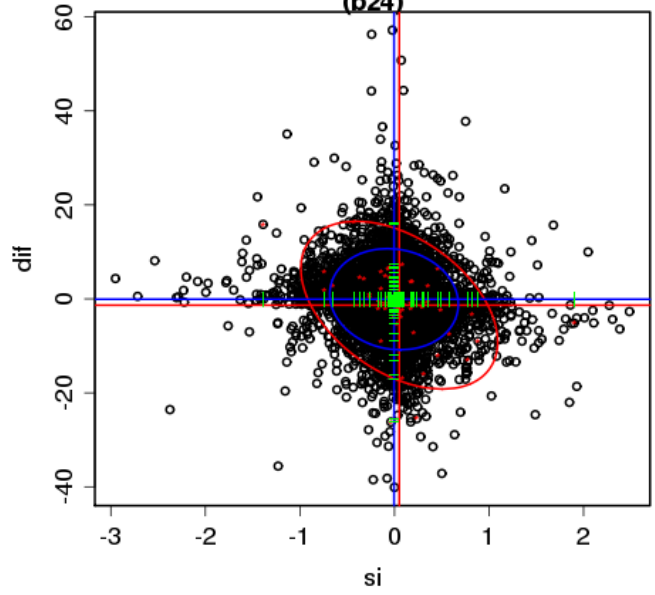

**GO:0045785**  
**positive regulation of cell adhesion**  
**(b24)**

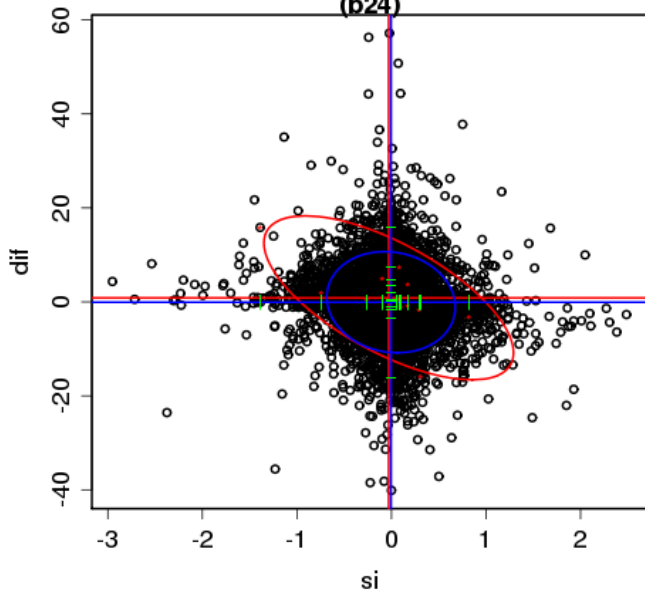

**GO:0030032**  
**lamellipodium biogenesis**  
**(b24)**

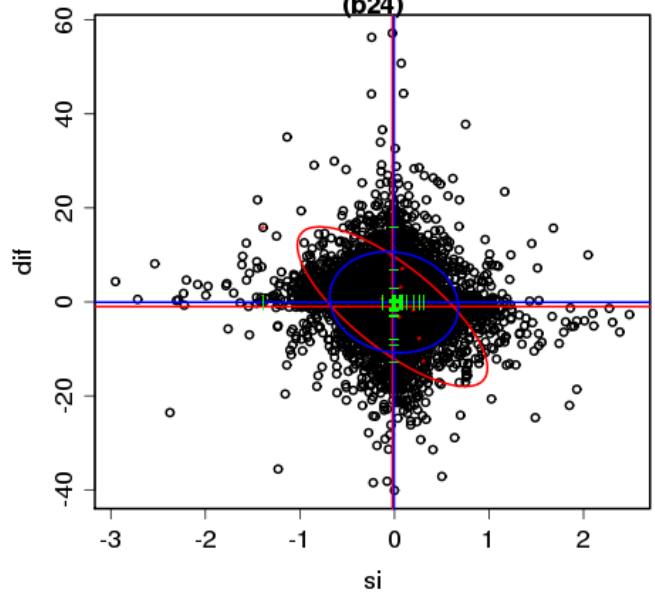



**GO:0050792**  
**regulation of viral reproduction**

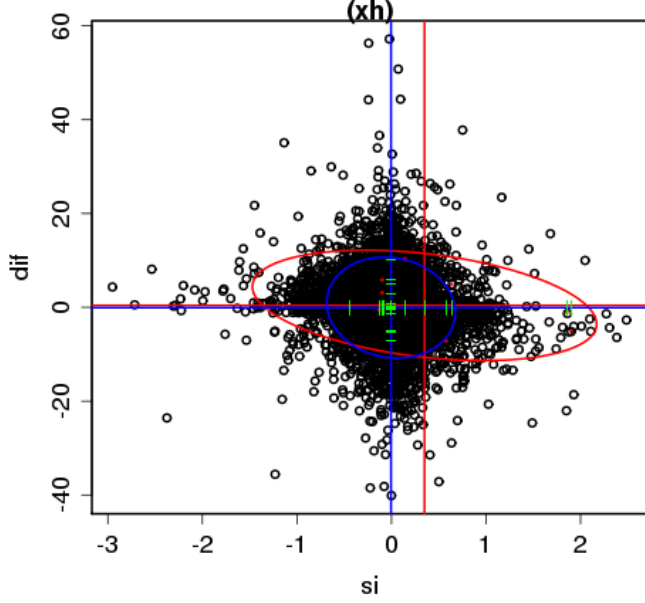

**GO:0001709**  
**cell fate determination**

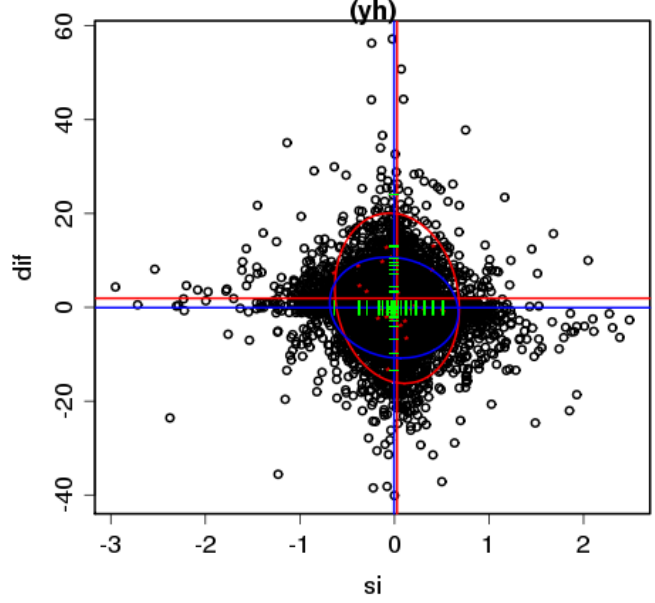

**GO:0019226**  
**transmission of nerve impulse**

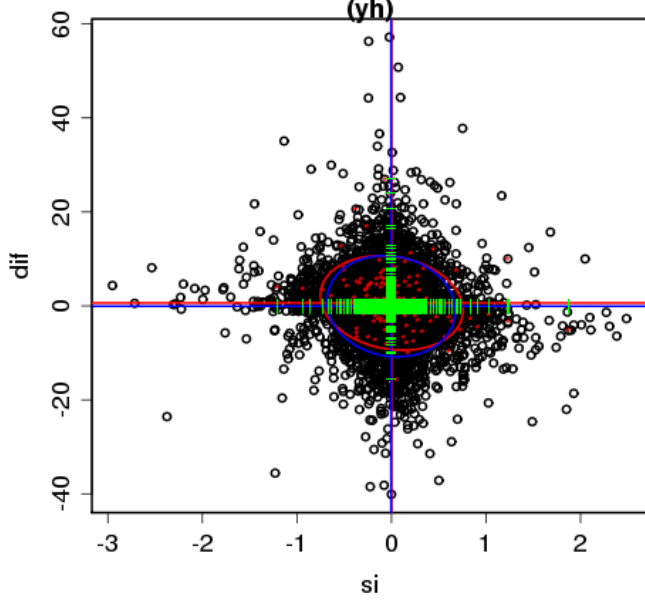

**GO:0007416**  
**synaptogenesis**

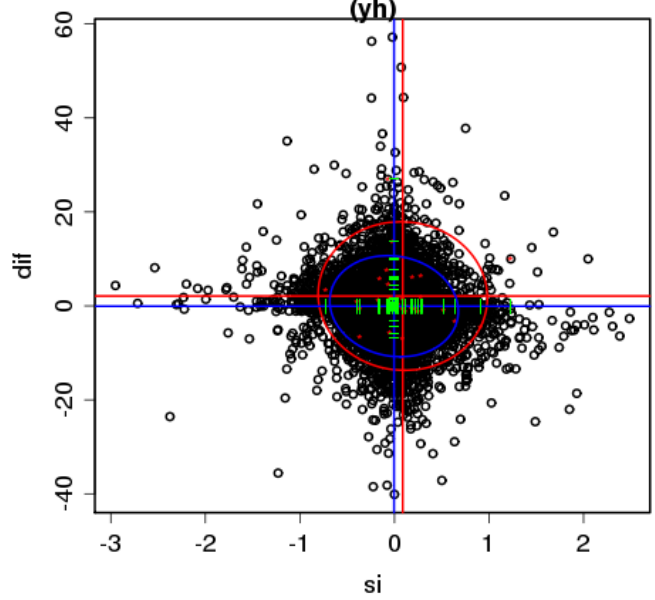

**GO:0065004**  
**protein-DNA complex assembly**

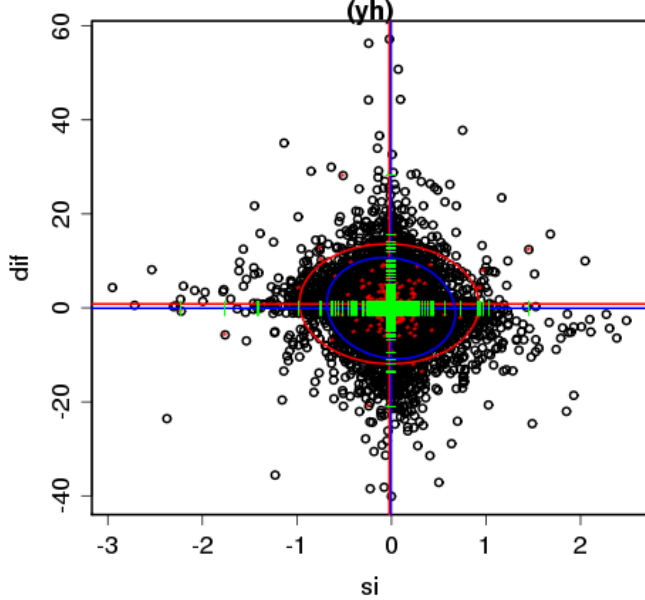

**GO:0006325**  
**establishment and/or maintenance of chromatin architecture**

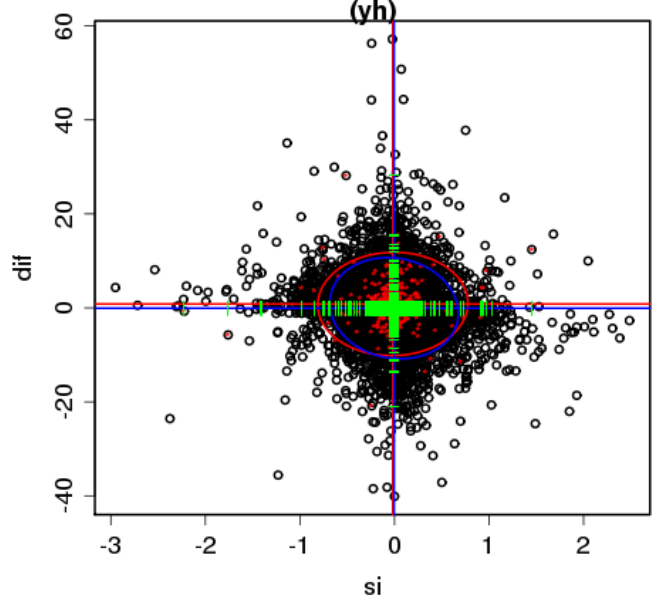

**GO:0006333**  
**chromatin assembly or disassembly**  
(yh)

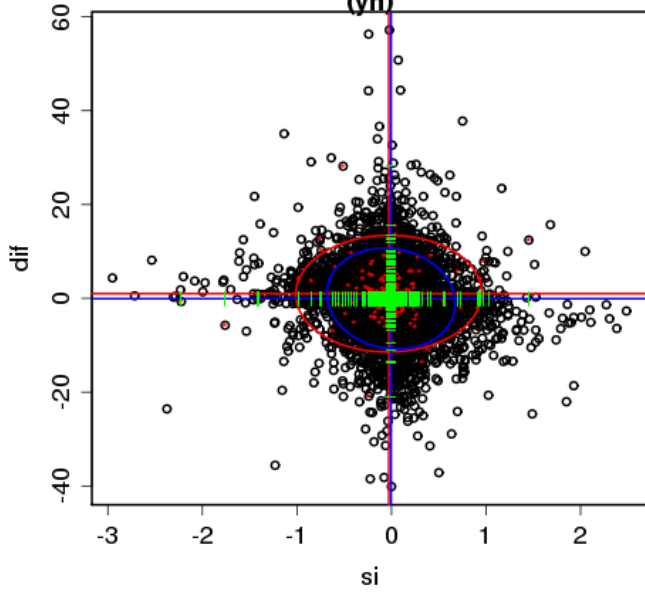

**GO:0008286**  
**insulin receptor signaling pathway**  
(yh)

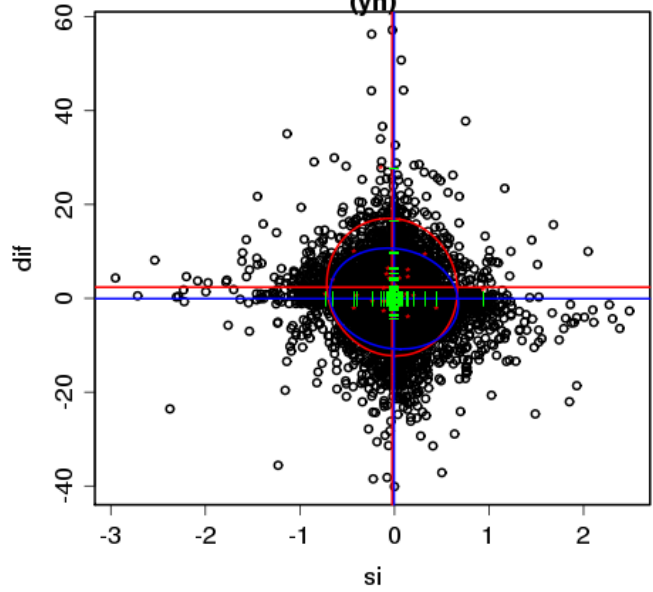

**GO:0051648**  
**vesicle localization**  
(yh)

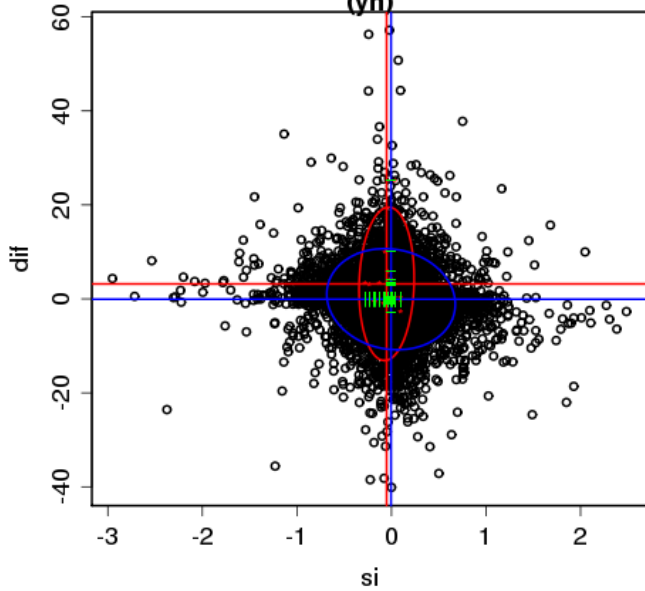

**GO:0016339**  
**calcium-dependent cell-cell adhesion**  
(yh)

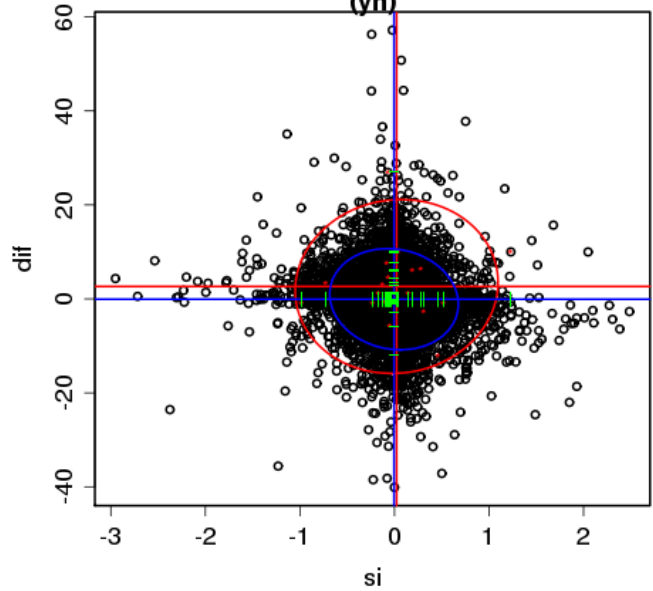

**GO:0030239**  
**myofibril assembly**  
(yh)

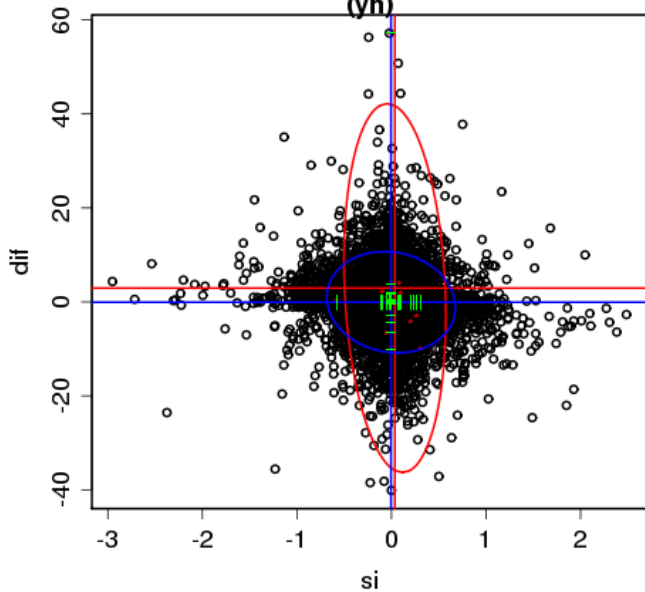

**GO:0051146**  
**striated muscle cell differentiation**  
(yh)

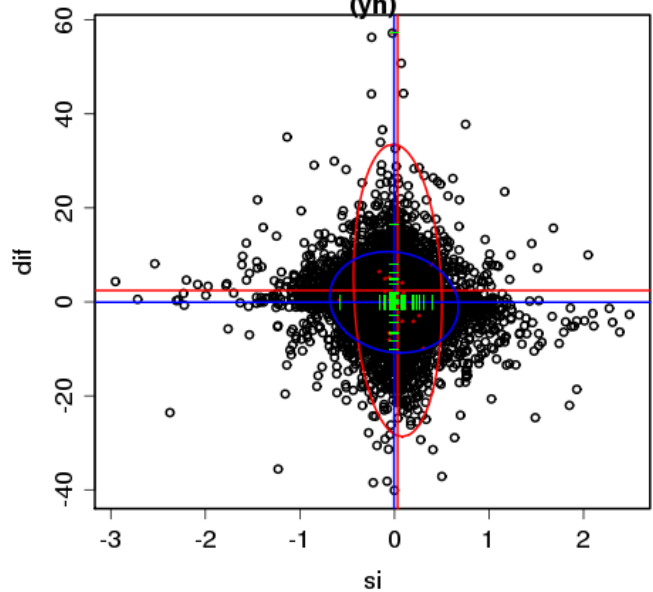

**GO:0055002**  
**striated muscle cell development**  
(yh)

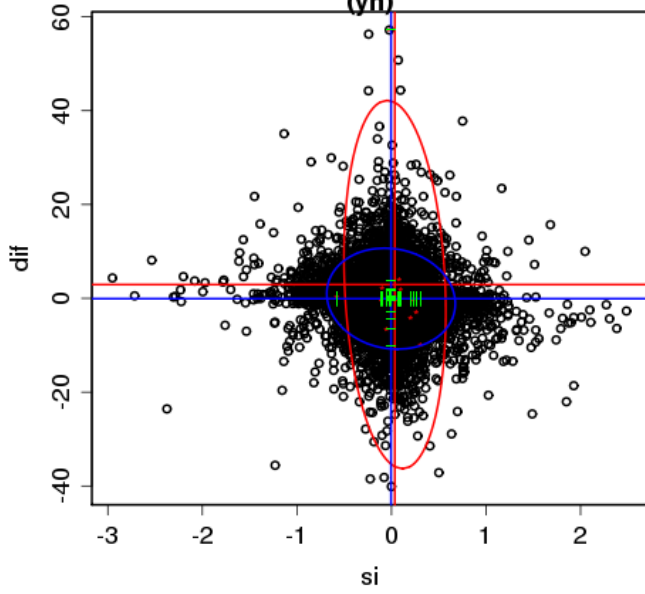

**GO:0048009**  
**insulin-like growth factor receptor signaling pathway**  
(yh)

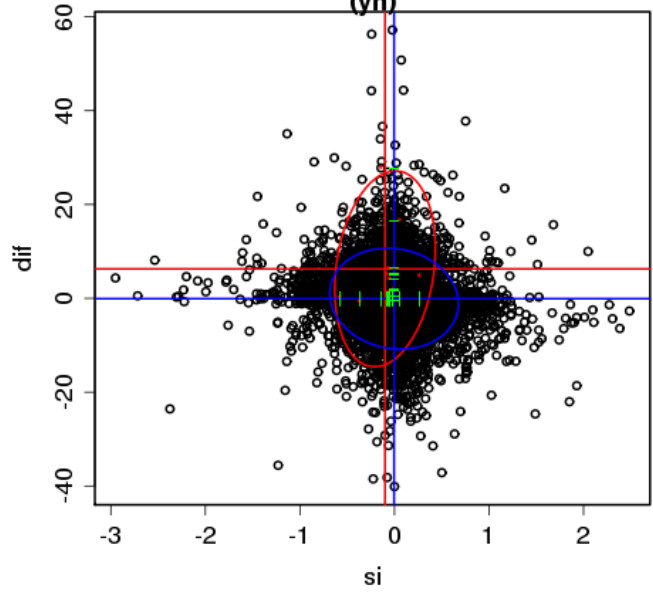

**GO:0000087**  
**M phase of mitotic cell cycle**  
(yl)

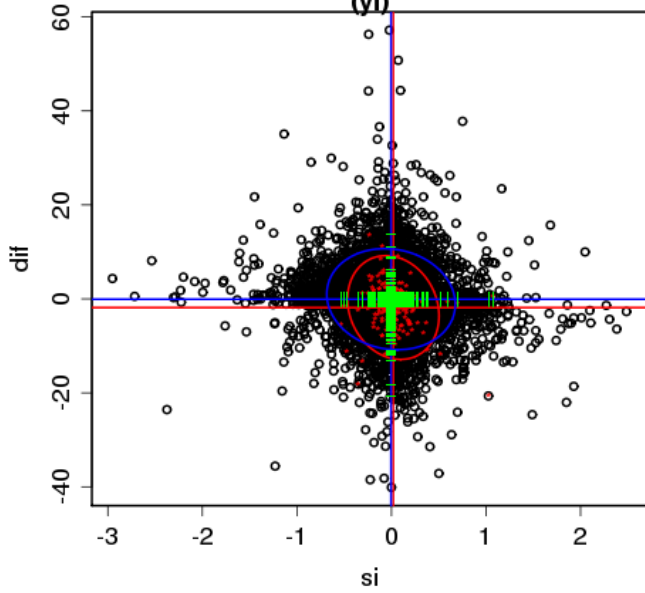

**GO:0000278**  
**mitotic cell cycle**  
(yl)

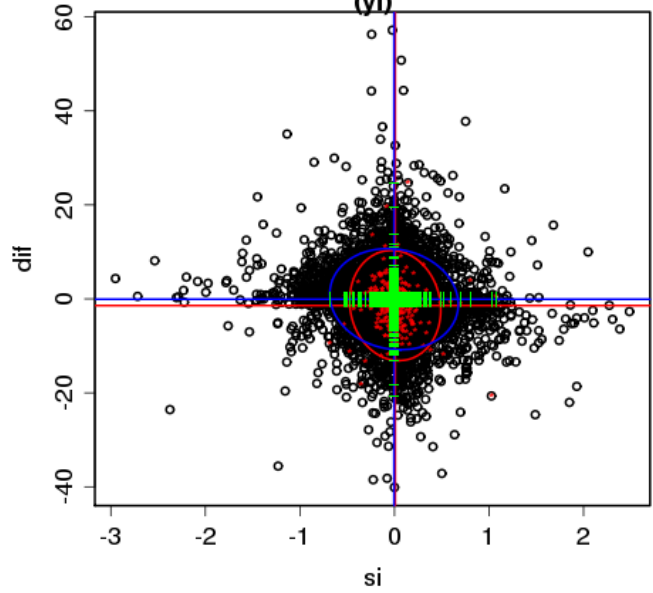

**GO:0000279**  
**M phase**  
(yl)

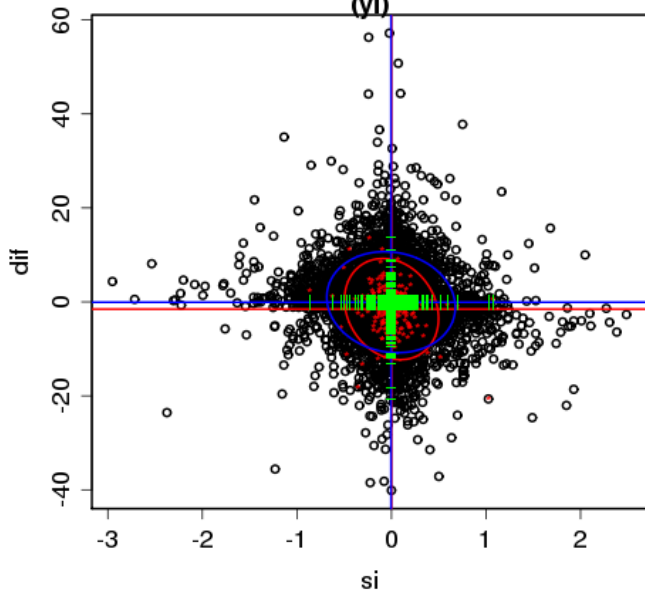

**GO:0022402**  
**cell cycle process**  
(yl)

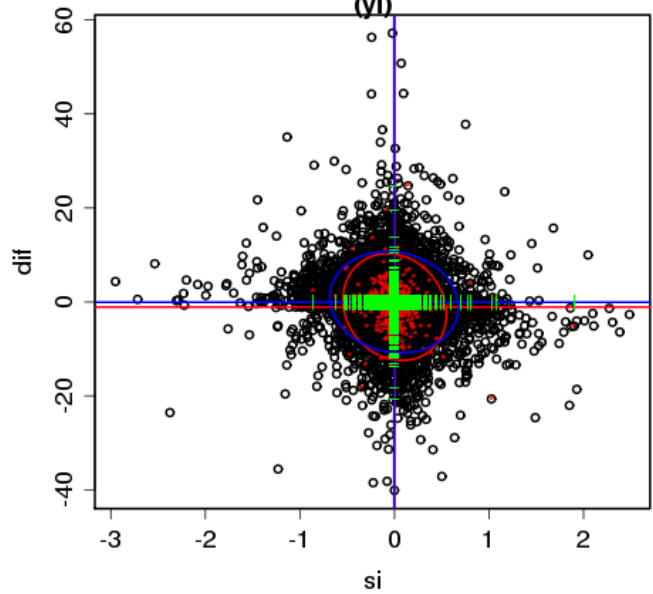

**GO:0022403**  
**cell cycle phase**  
(yl)

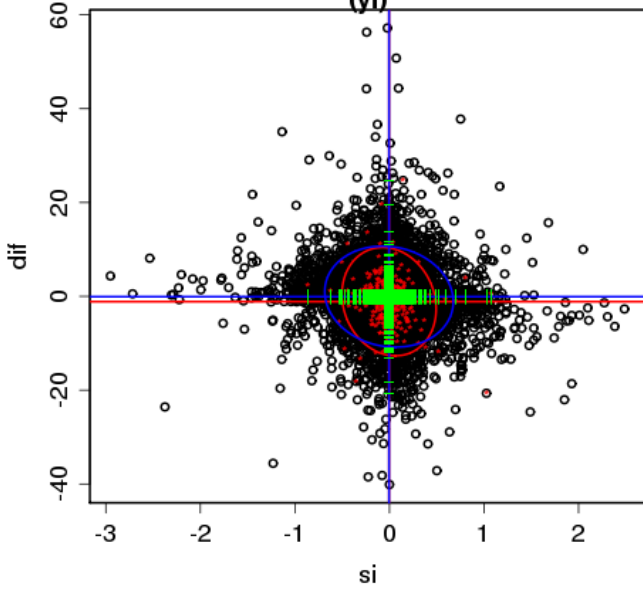

**GO:0006396**  
**RNA processing**  
(yl)

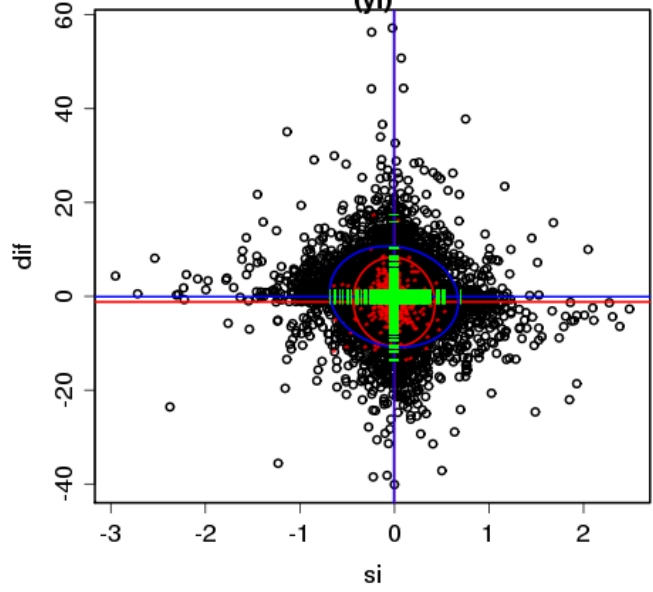

**GO:0051301**  
**cell division**  
(yl)

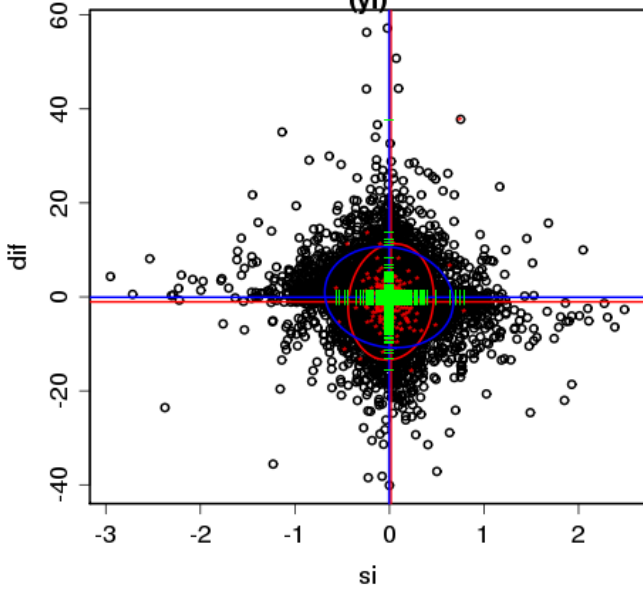

**GO:0007067**  
**mitosis**  
(yl)

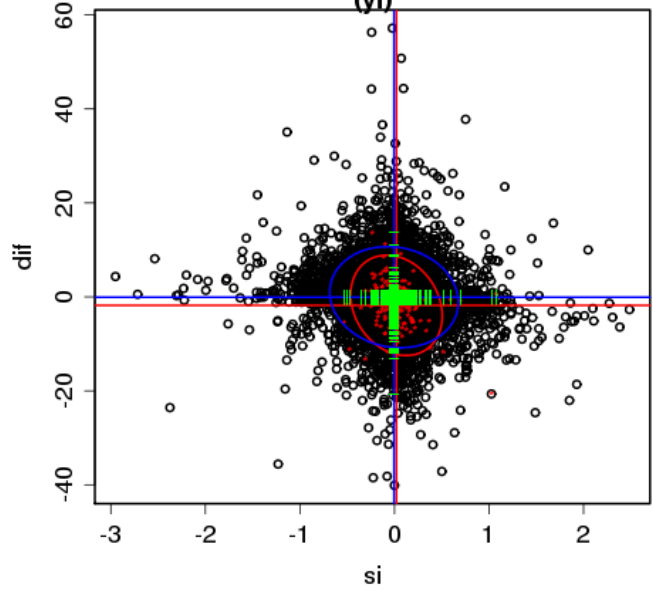

**GO:0007599**  
**hemostasis**  
(yl)

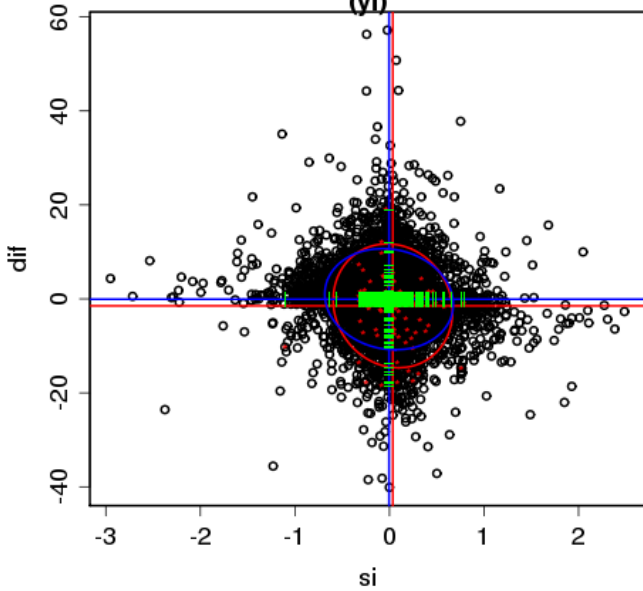

**GO:0042060**  
**wound healing**  
(yl)

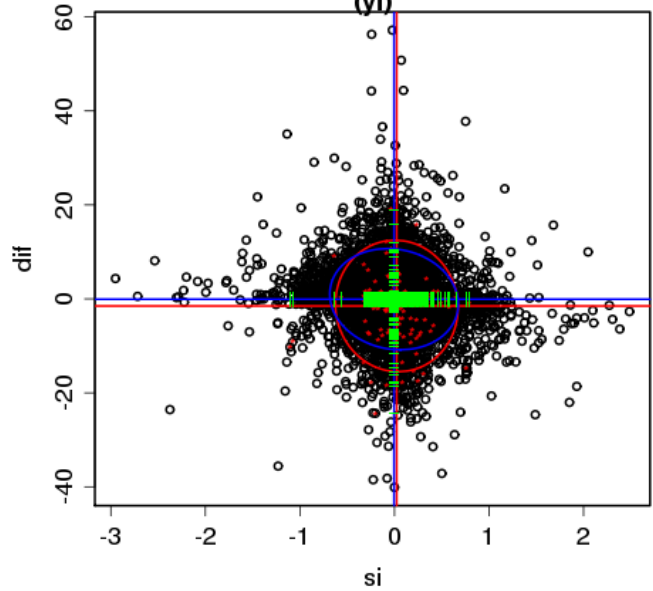

**GO:0050817**  
**coagulation**  
(yl)

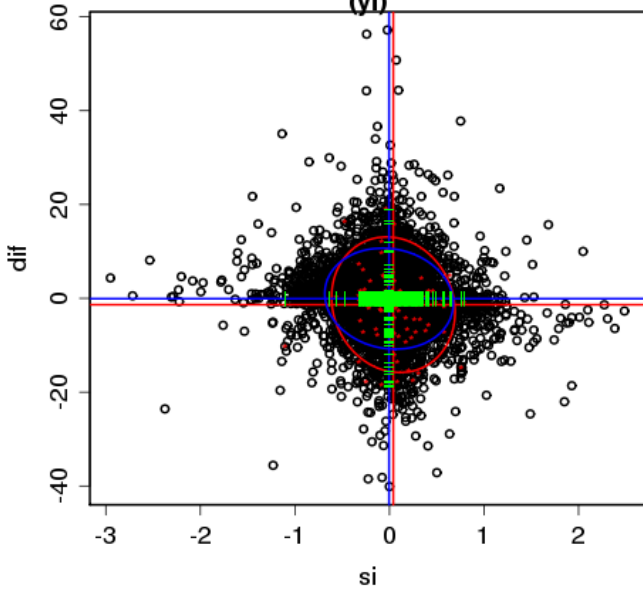

**GO:0050878**  
**regulation of body fluid levels**  
(yl)

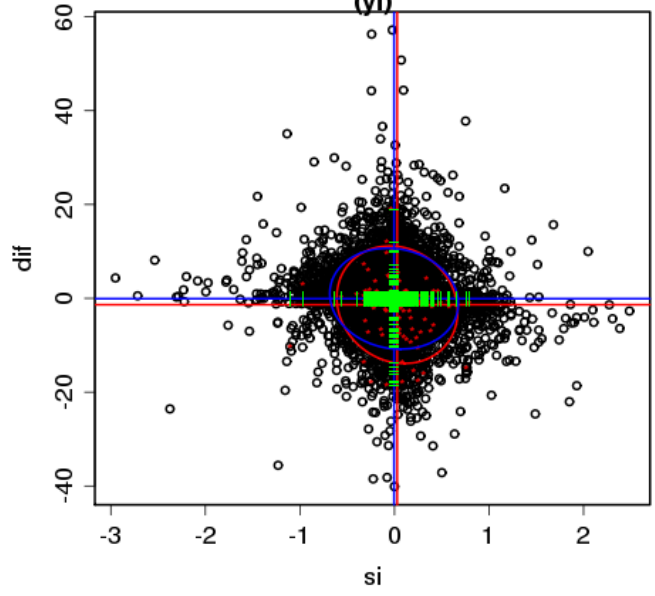

**GO:0007596**  
**blood coagulation**  
(yl)

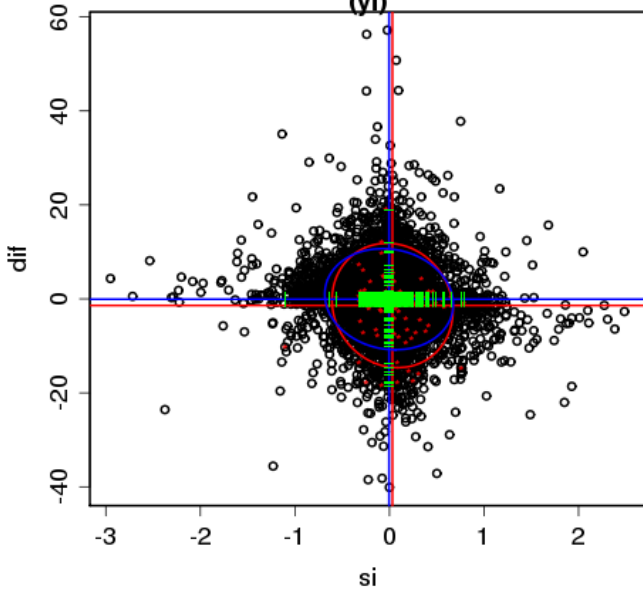

**GO:0046483**  
**heterocycle metabolic process**  
(yl)

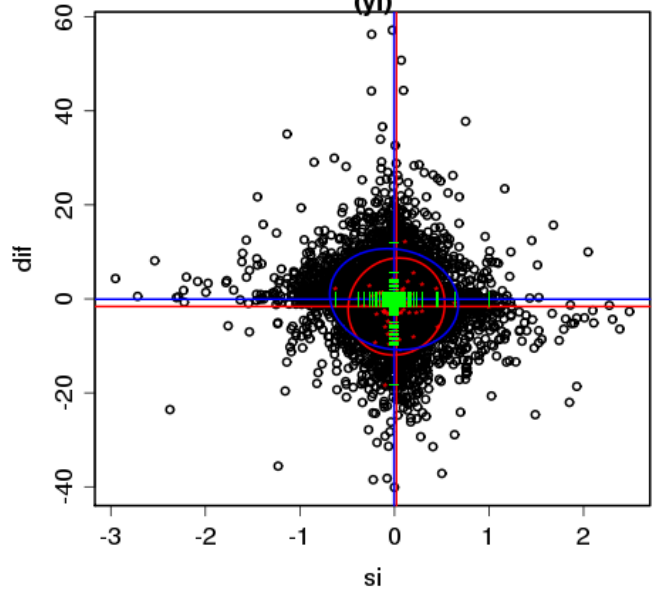

**GO:0006457**  
**protein folding**  
(yl)

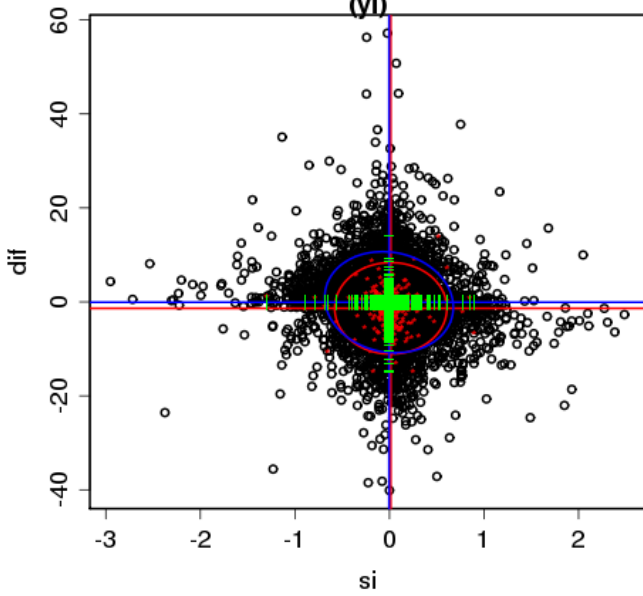

**GO:0006118**  
(yl)

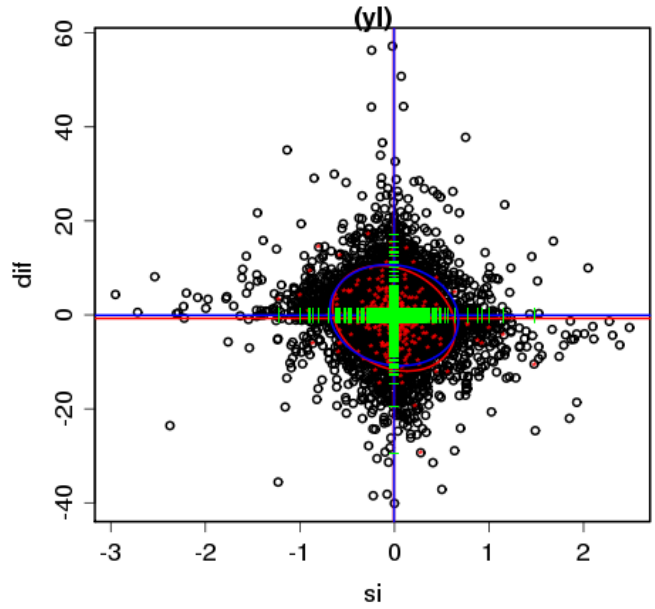

**GO:0006461**  
**protein complex assembly**  
(yl)

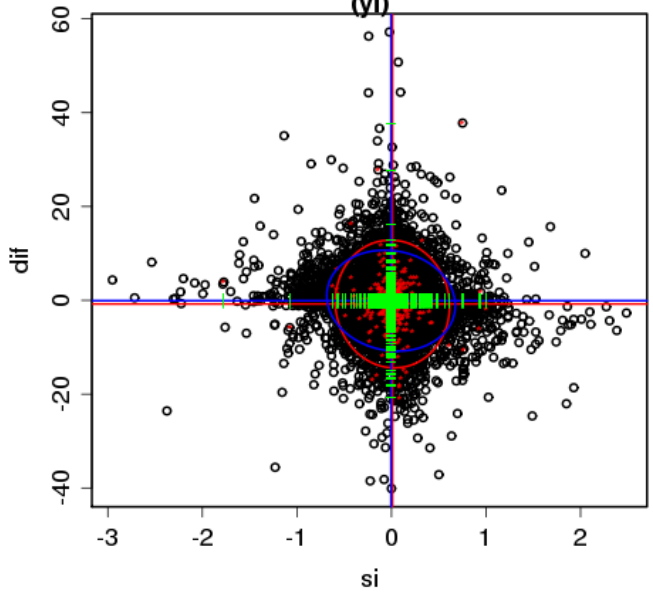

**GO:0007088**  
**regulation of mitosis**  
(yl)

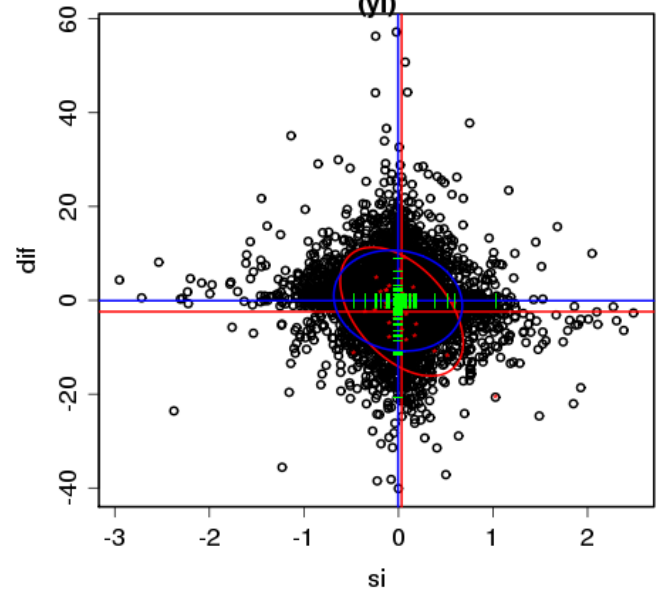

**GO:0051726**  
**regulation of cell cycle**  
(yl)

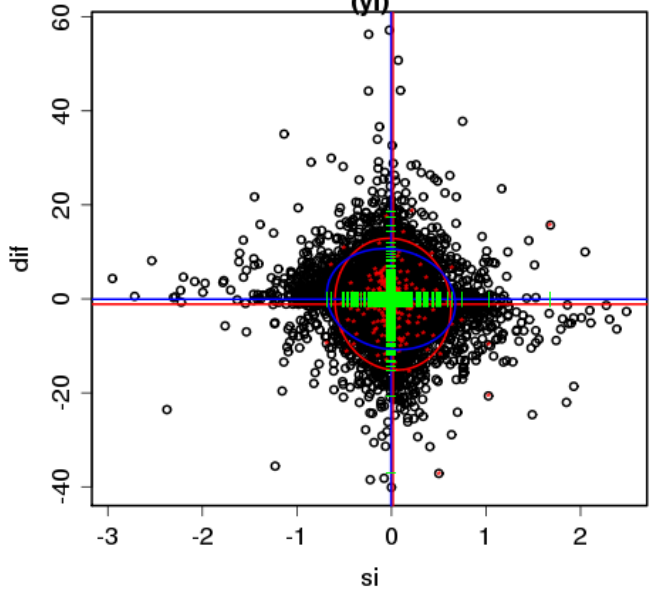

**GO:0007160**  
**cell-matrix adhesion**  
(yl)

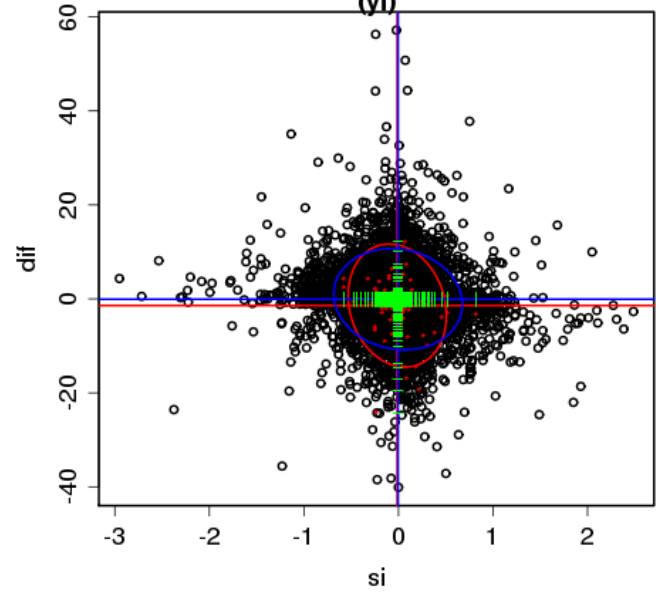

**GO:0031589**  
**cell-substrate adhesion**  
(yl)

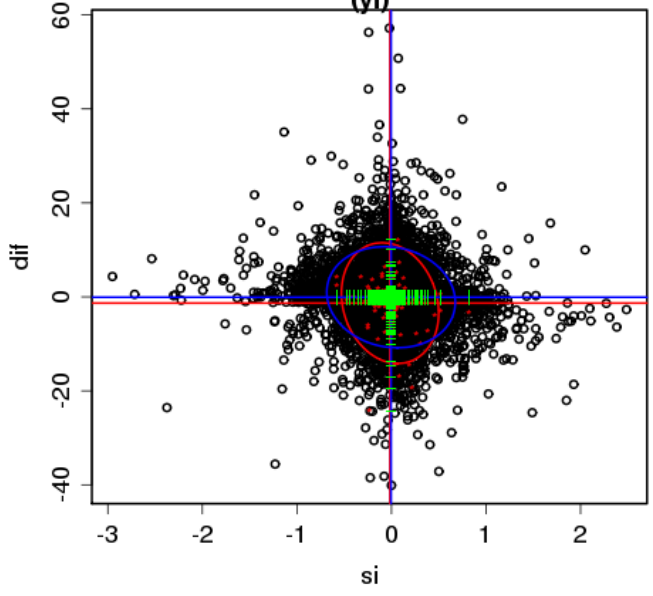

**GO:0019221**  
**cytokine and chemokine mediated signaling pathway**  
(yl)

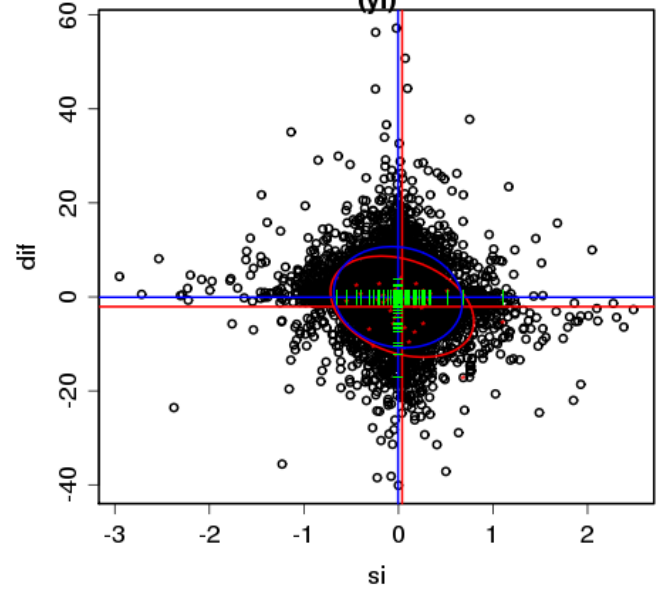

GO:0008610  
lipid biosynthetic process  
(yl)

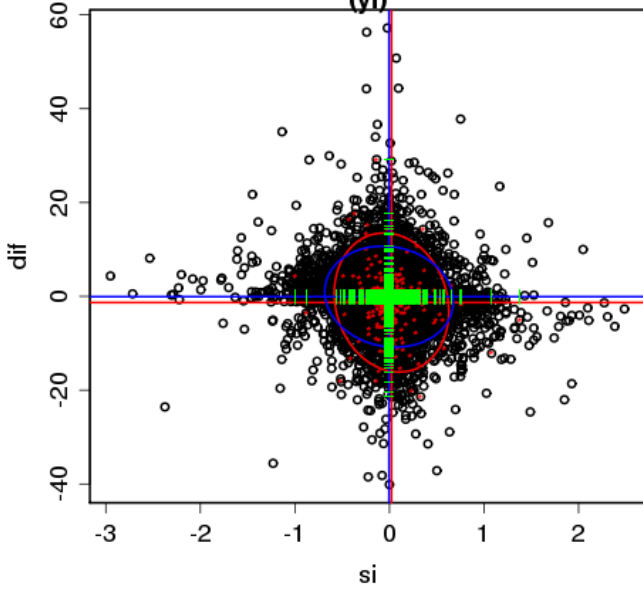

GO:0006694  
steroid biosynthetic process  
(yl)

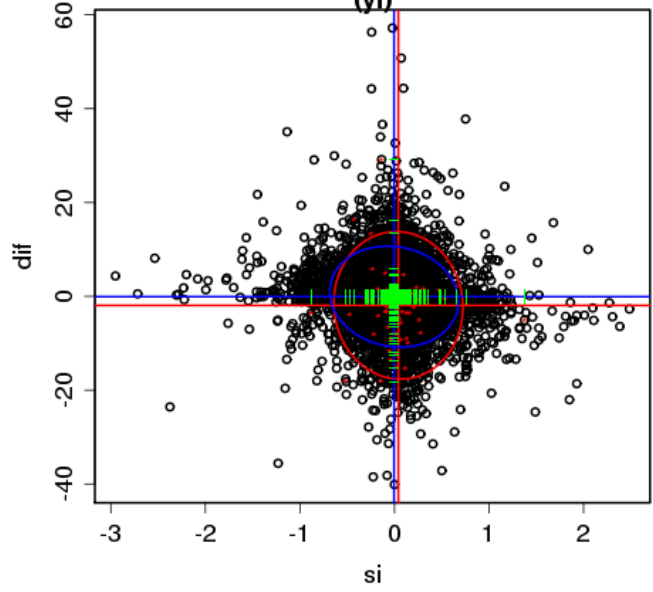

GO:0007398  
ectoderm development  
(yl)

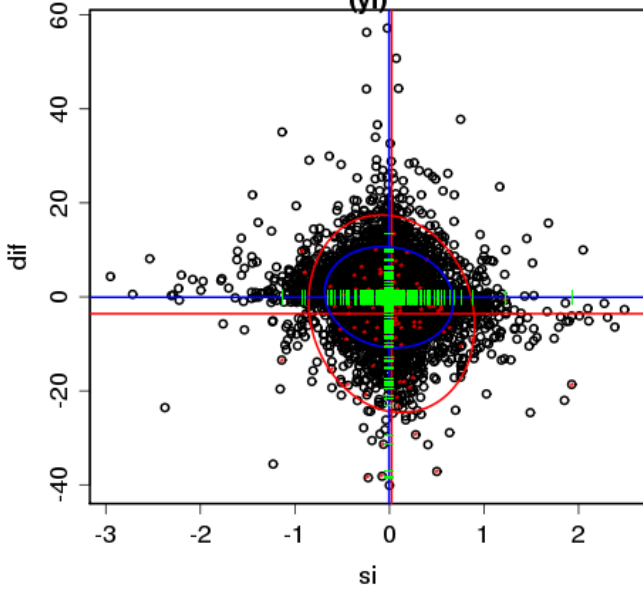

GO:0008544  
epidermis development  
(yl)

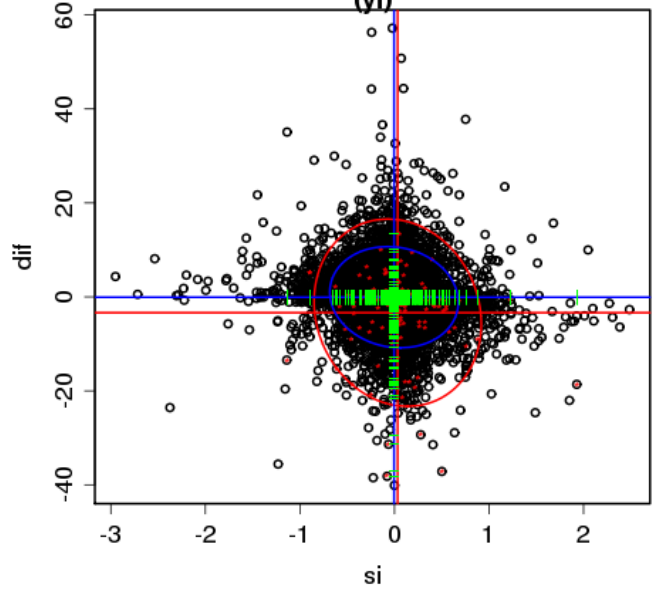

GO:0009888  
tissue development  
(yl)

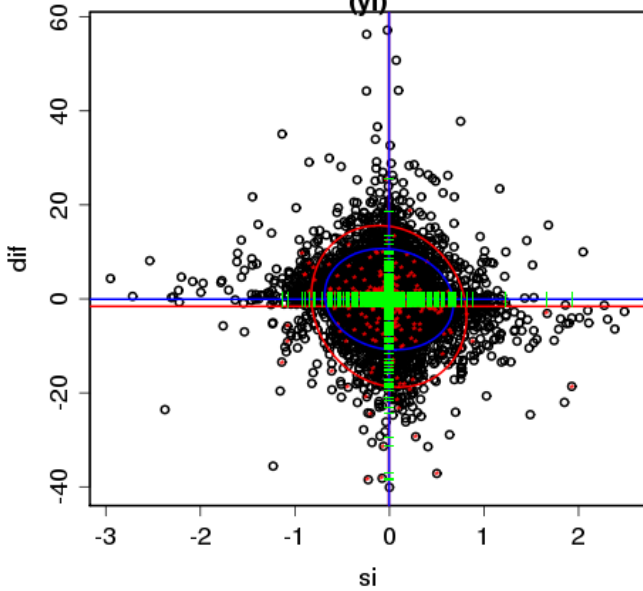

GO:0009913  
epidermal cell differentiation  
(yl)

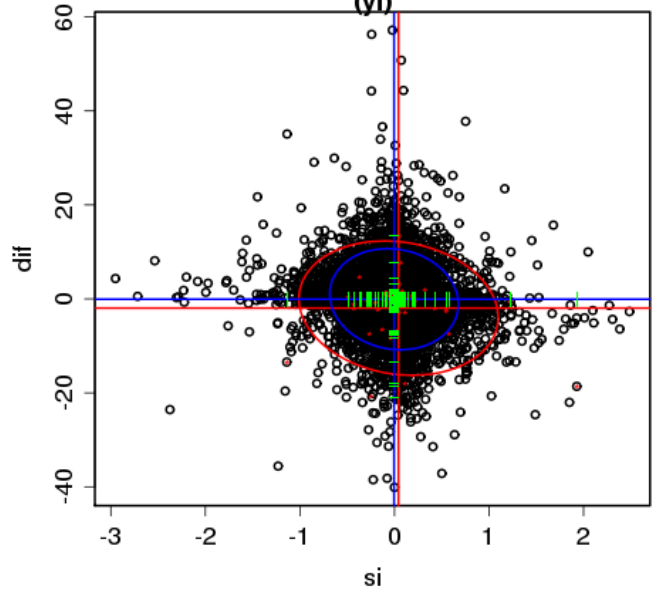



**GO:0031424**  
**keratinization**  
(yl)

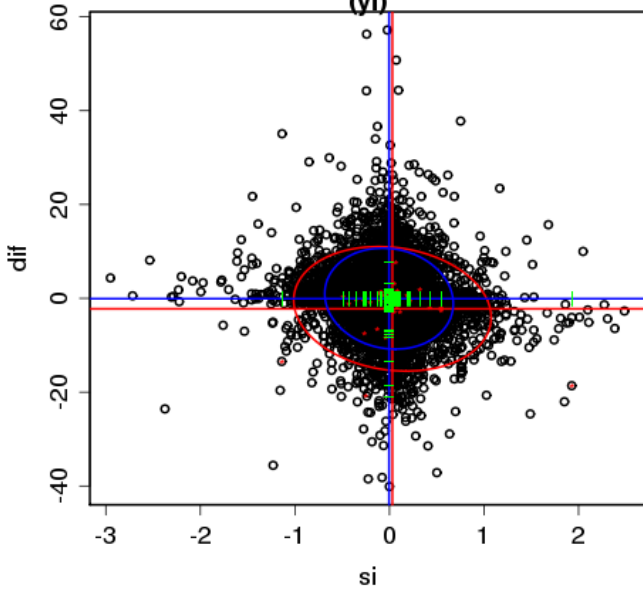

**GO:0006399**  
**tRNA metabolic process**  
(yl)

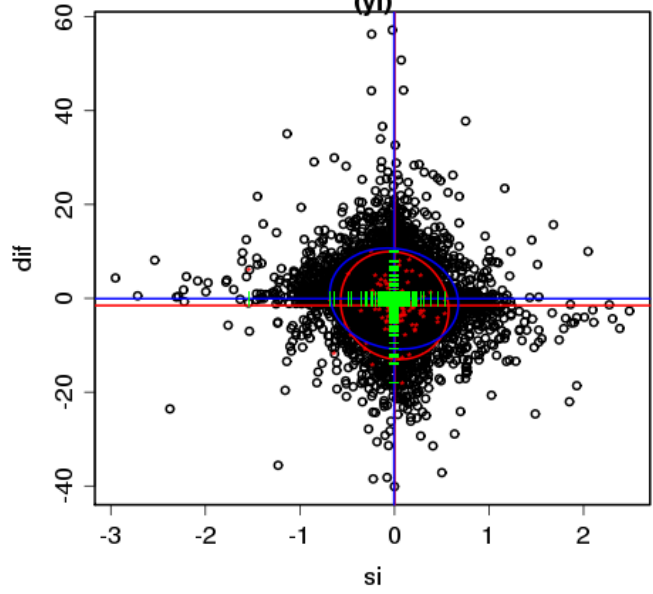

**GO:0006418**  
**tRNA aminoacylation for protein translation**  
(yl)

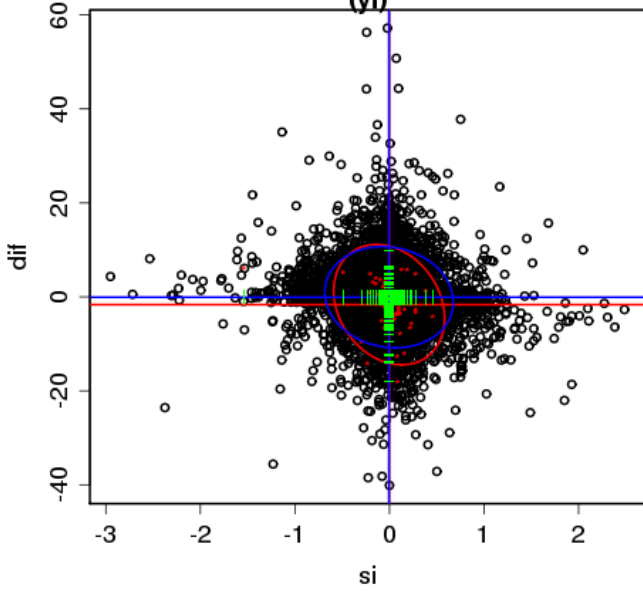

**GO:0006519**  
**amino acid and derivative metabolic process**  
(yl)

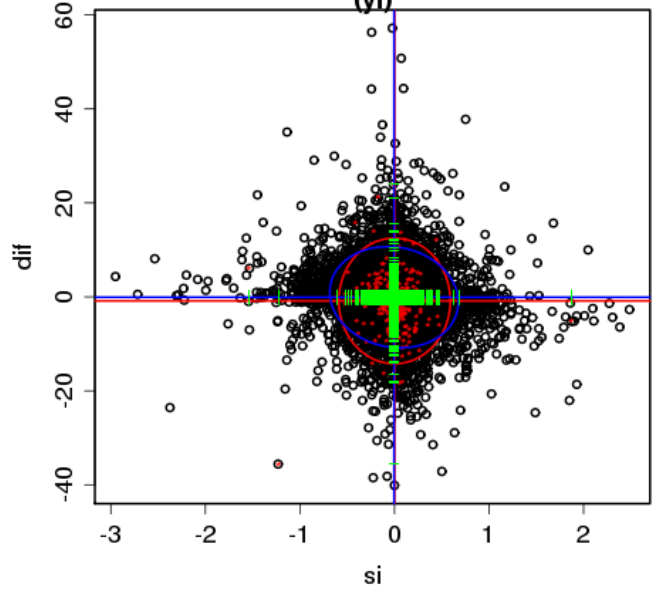

**GO:0006520**  
**amino acid metabolic process**  
(yl)

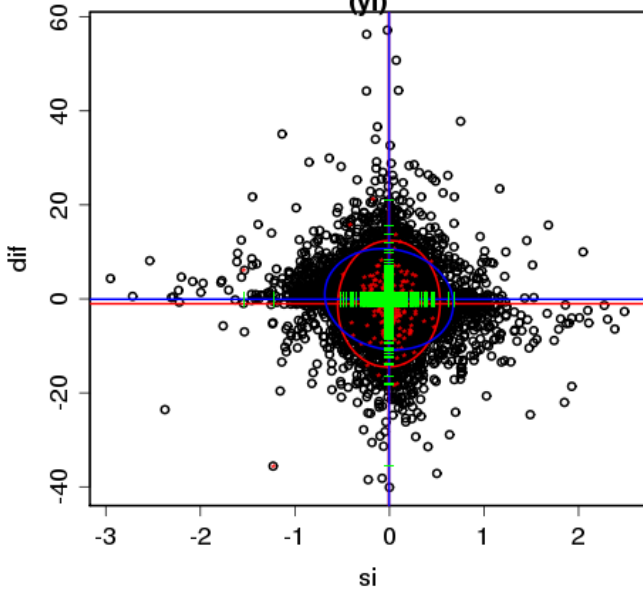

**GO:0043038**  
**amino acid activation**  
(yl)

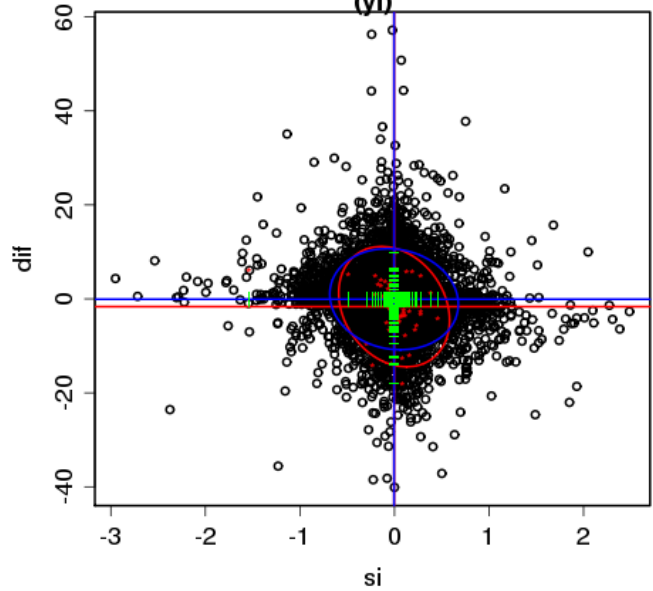



**GO:0043039**  
**tRNA aminoacylation**  
(yl)

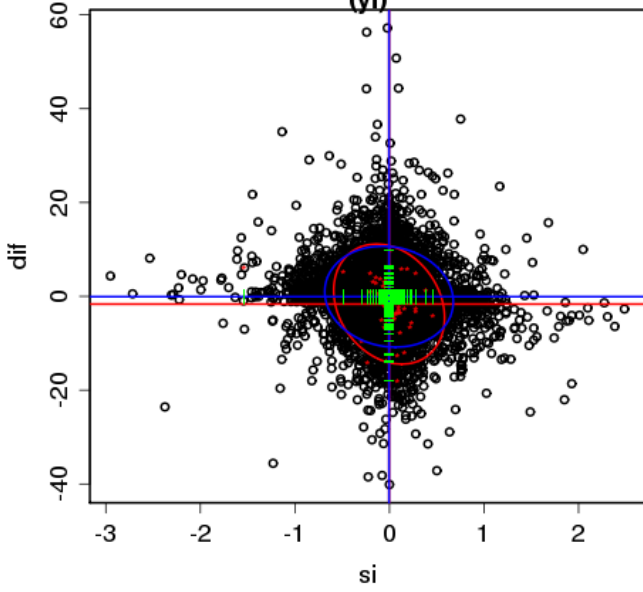

**GO:0065002**  
**intracellular protein transport across a membrane**  
(yl)

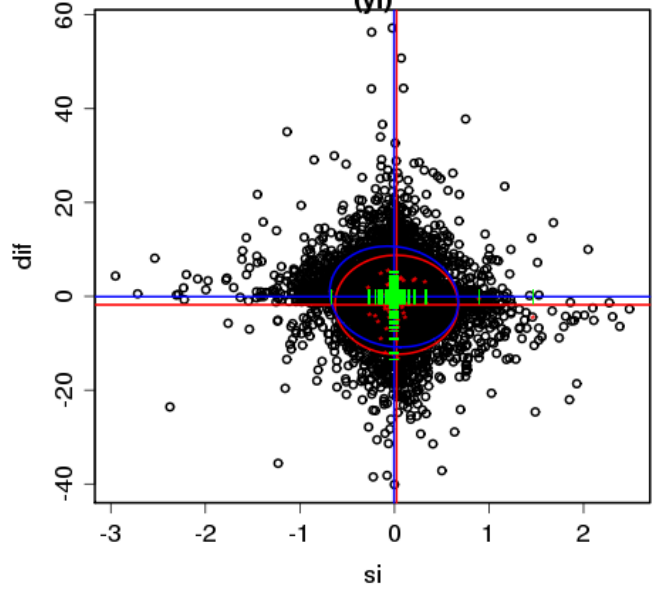

**GO:0006096**  
**glycolysis**  
(yl)

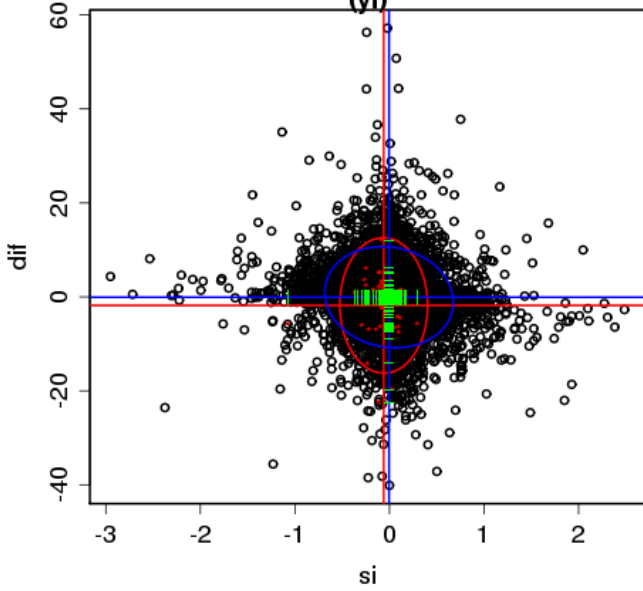

**GO:0006954**  
**inflammatory response**  
(yl)

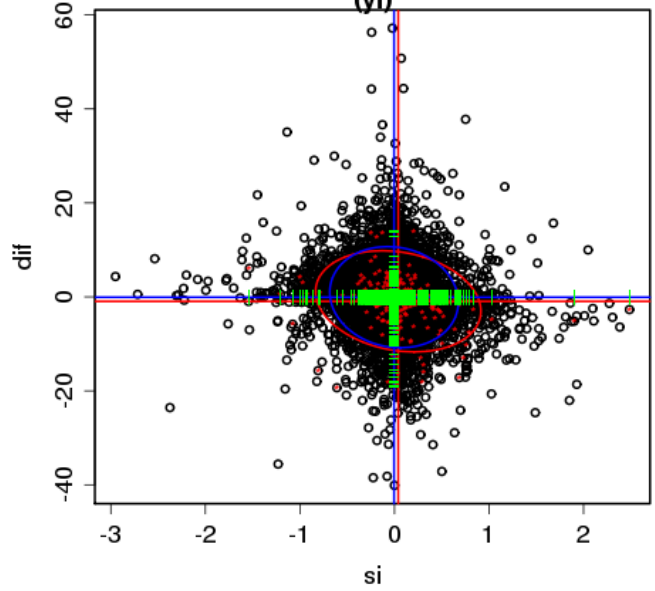

**GO:0043623**  
**cellular protein complex assembly**  
(yl)

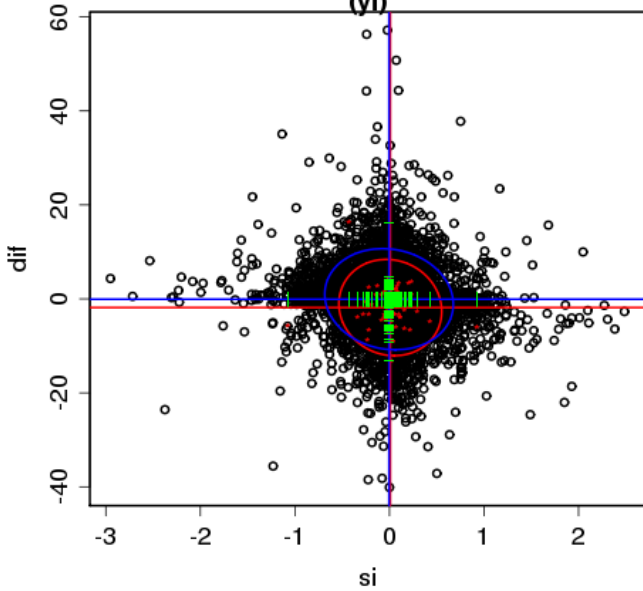

**GO:0043549**  
**regulation of kinase activity**  
(yl)

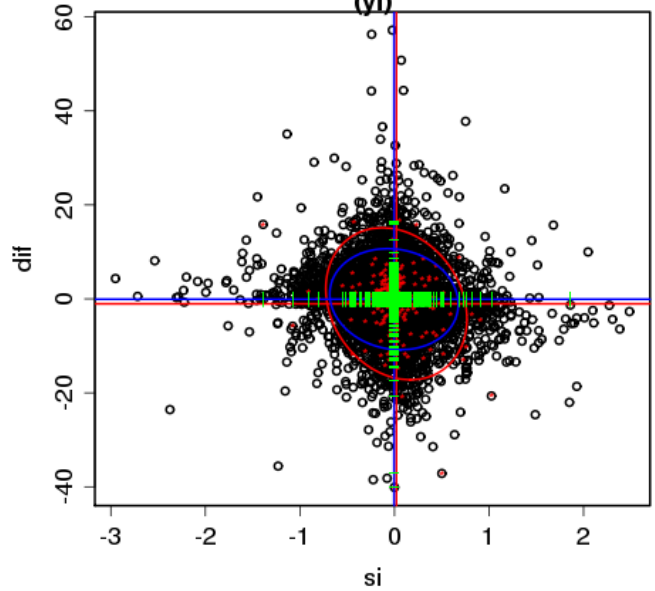

**GO:0051338**  
**regulation of transferase activity**  
(yl)

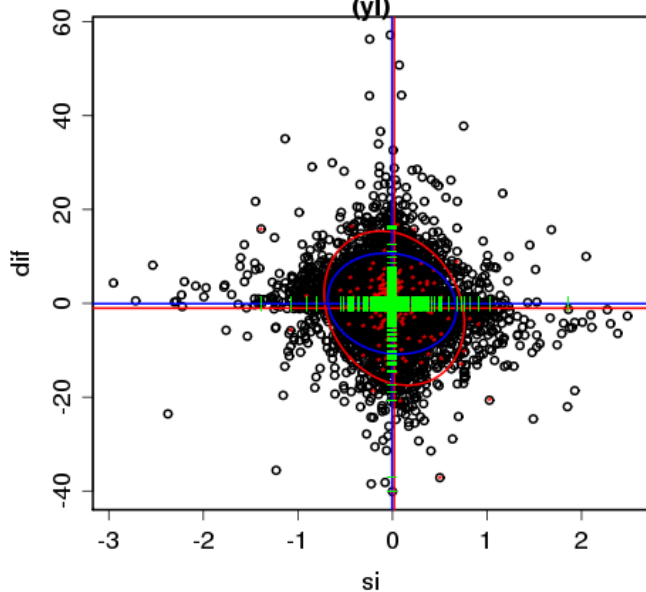

**GO:0045859**  
**regulation of protein kinase activity**  
(yl)

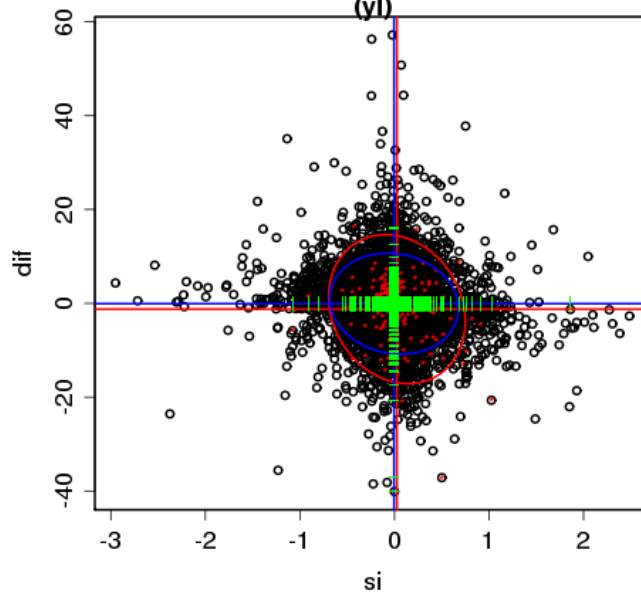

**GO:0009259**  
**ribonucleotide metabolic process**  
(yl)

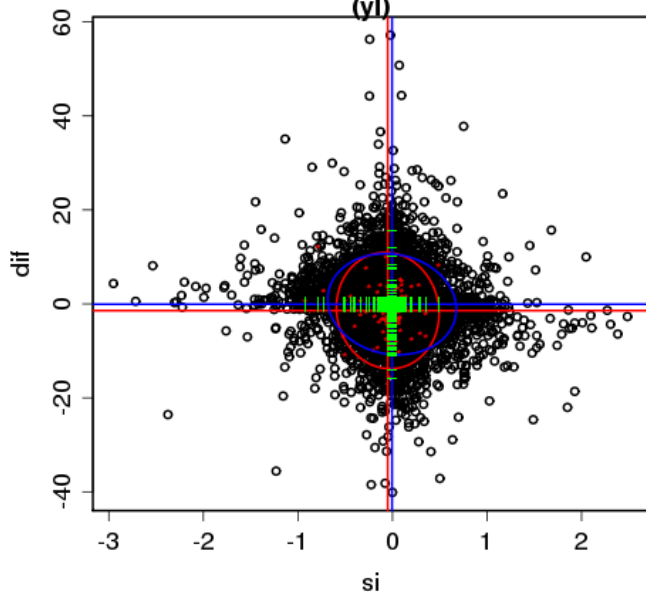

**GO:0055086**  
**nucleobase, nucleoside and nucleotide metabolic process**  
(yl)

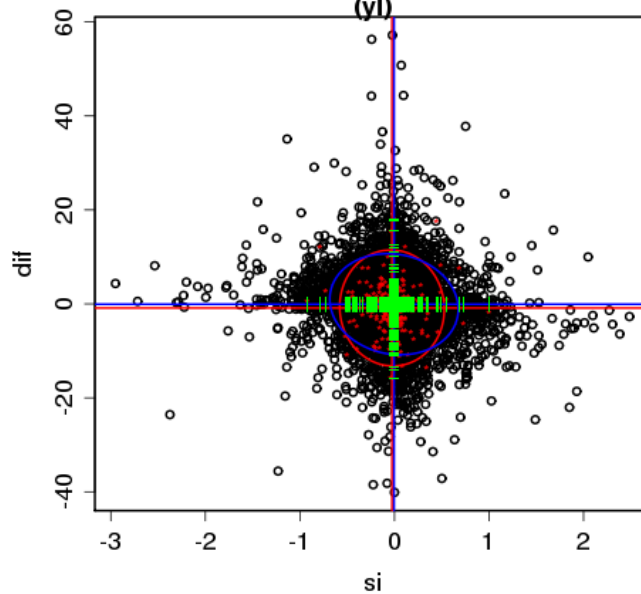

**GO:0006732**  
**coenzyme metabolic process**  
(yl)

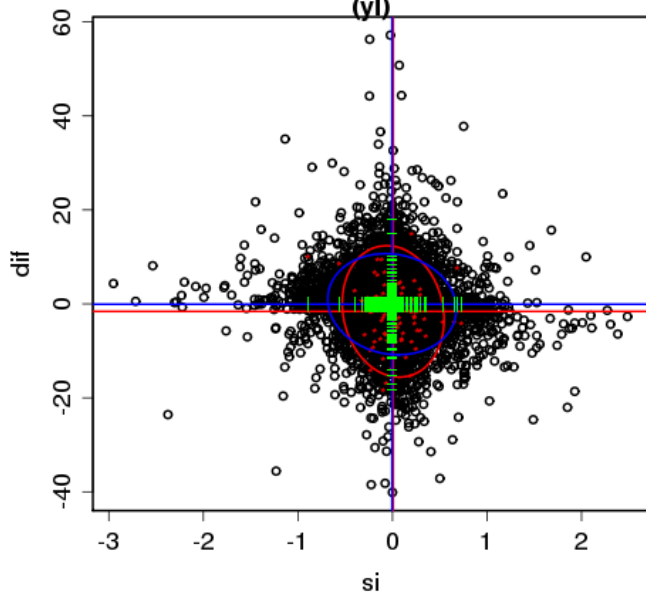

**GO:0006752**  
**group transfer coenzyme metabolic process**  
(yl)

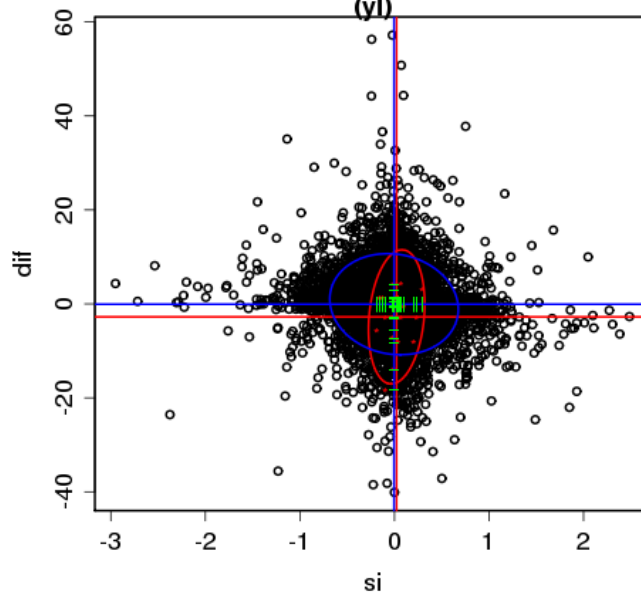

**GO:0009108**  
**coenzyme biosynthetic process**  
(yl)

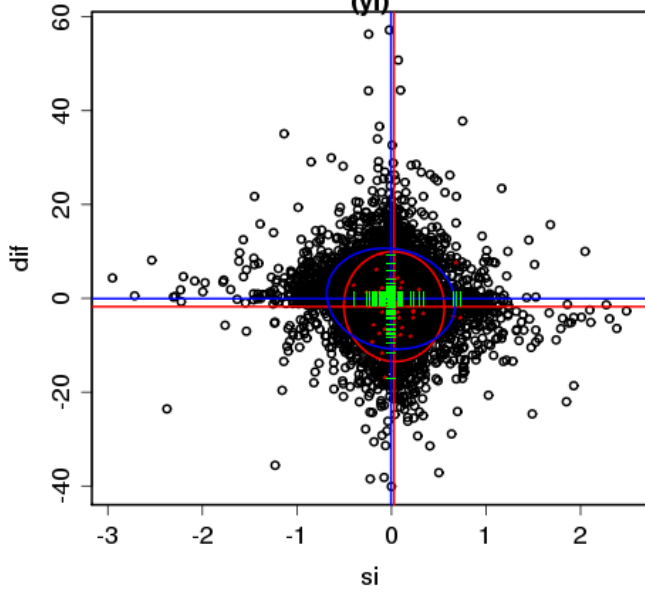

**GO:0051186**  
**cofactor metabolic process**  
(yl)

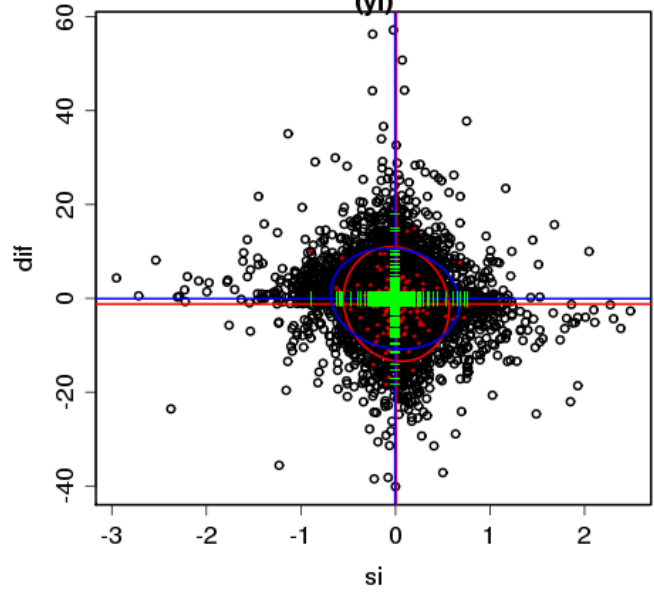

**GO:0051188**  
**cofactor biosynthetic process**  
(yl)

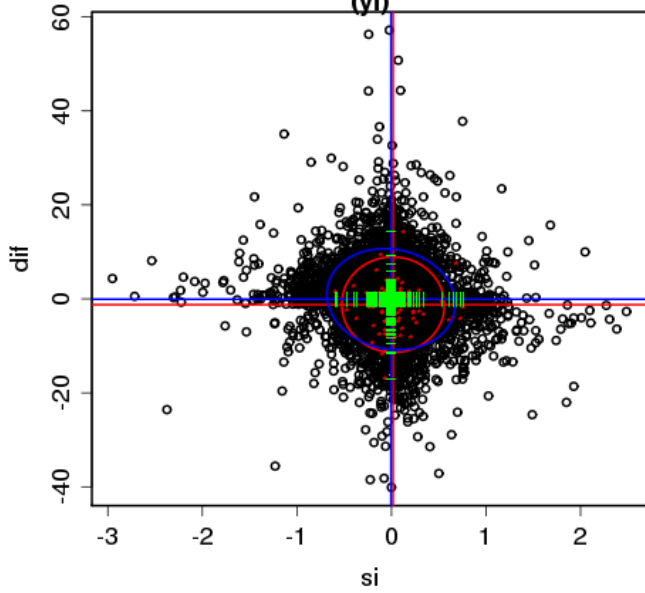

**GO:0006260**  
**DNA replication**  
(yl)

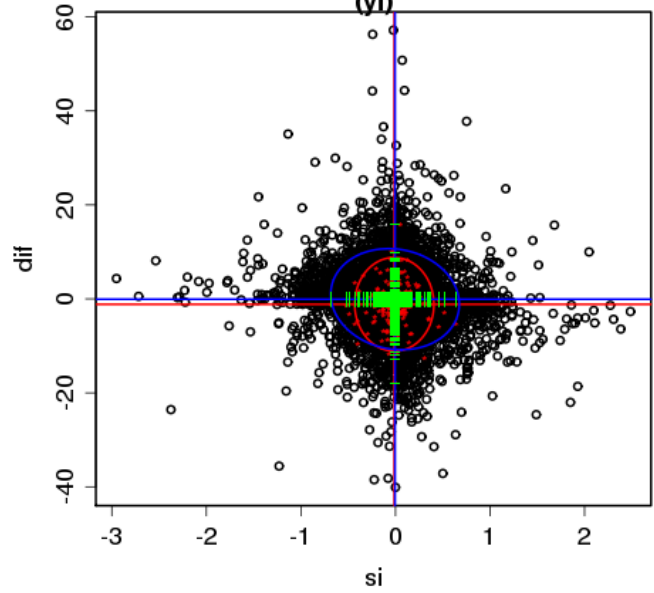

**GO:0006917**  
**induction of apoptosis**  
(yl)

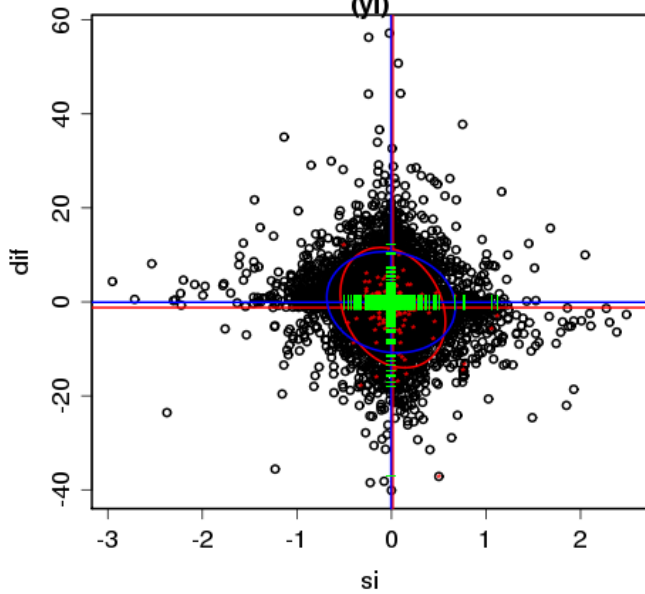

**GO:0008629**  
**induction of apoptosis by intracellular signals**  
(yl)

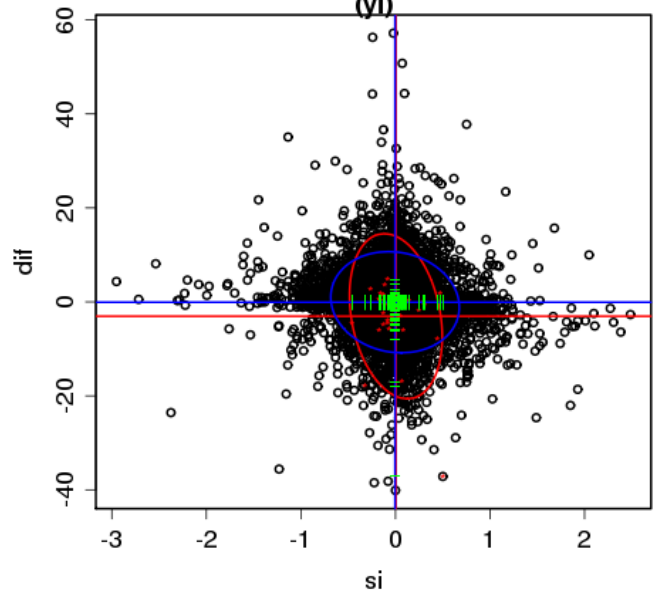

**GO:0012502**  
**induction of programmed cell death**  
(yl)

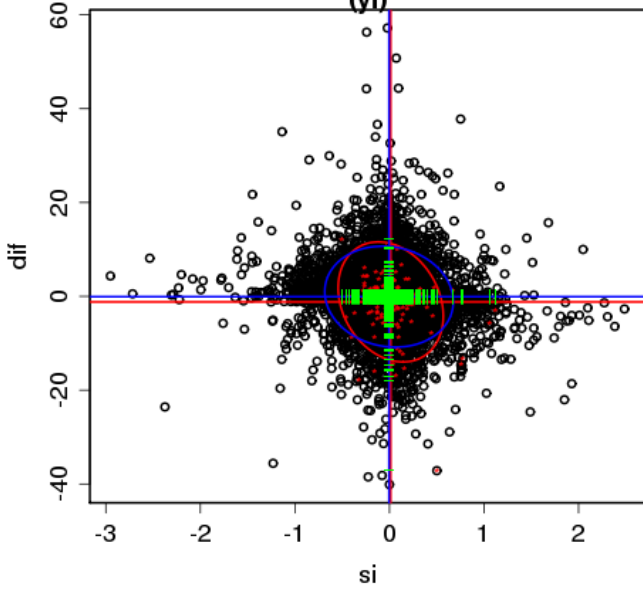

**GO:0042770**  
**DNA damage response, signal transduction**  
(yl)

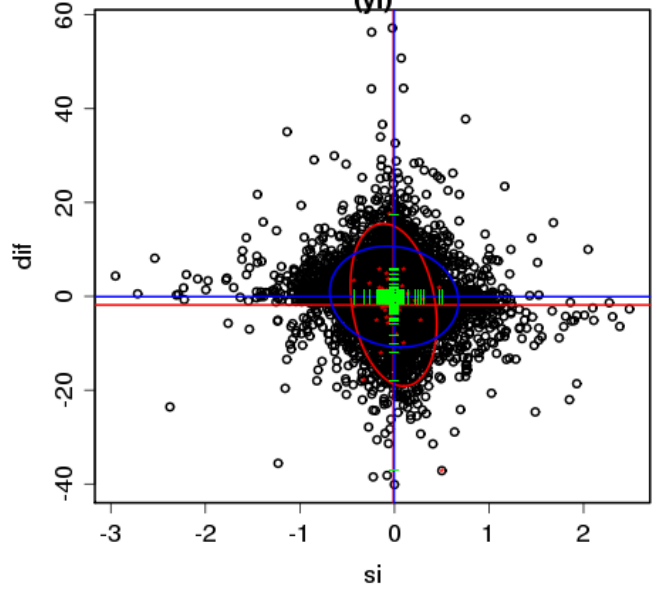

**GO:0043065**  
**positive regulation of apoptosis**  
(yl)

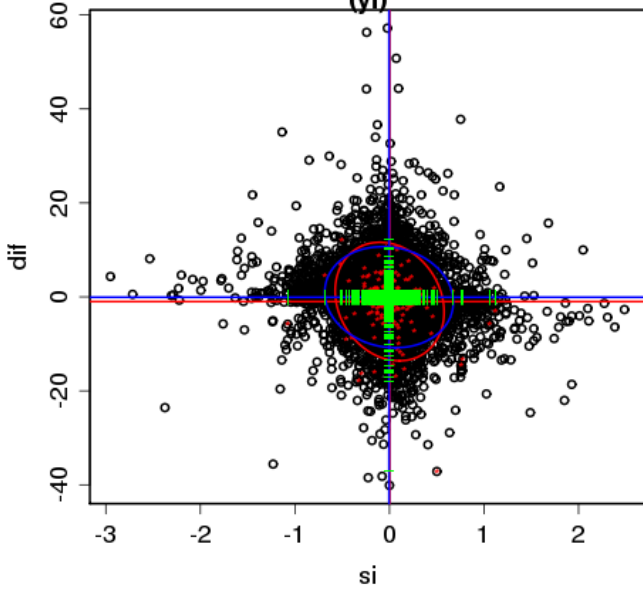

**GO:0043068**  
**positive regulation of programmed cell death**  
(yl)

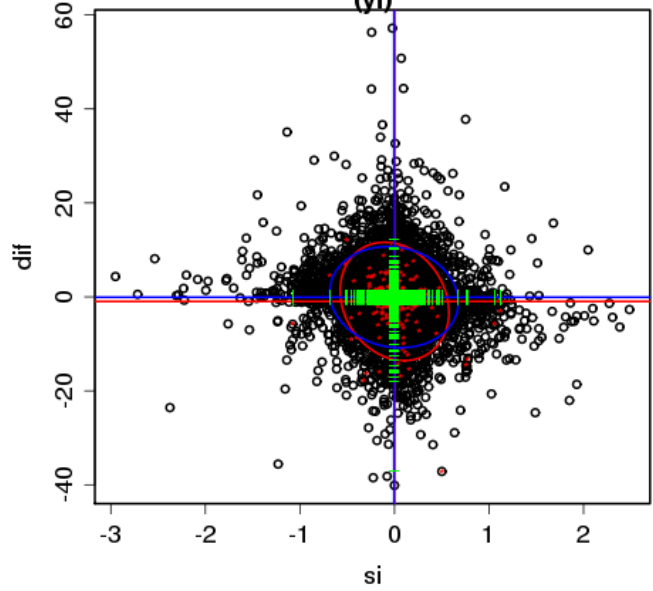

**GO:0008630**  
**age response, signal transduction resulting in induction**  
(yl)

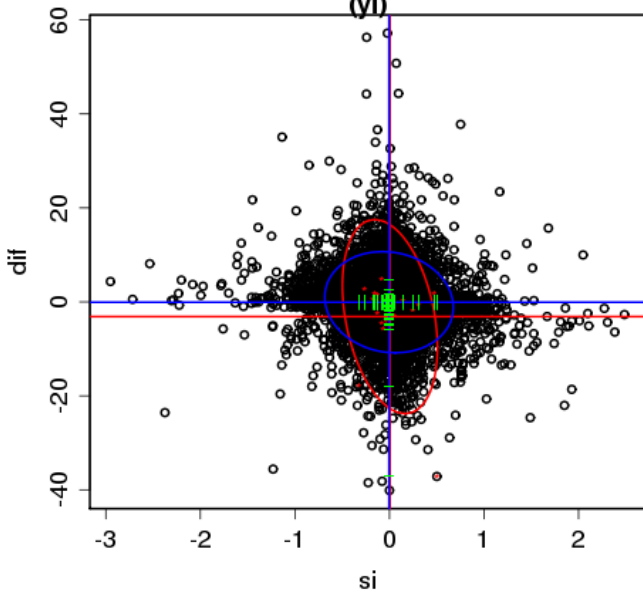

**GO:0016072**  
**rRNA metabolic process**  
(yl)

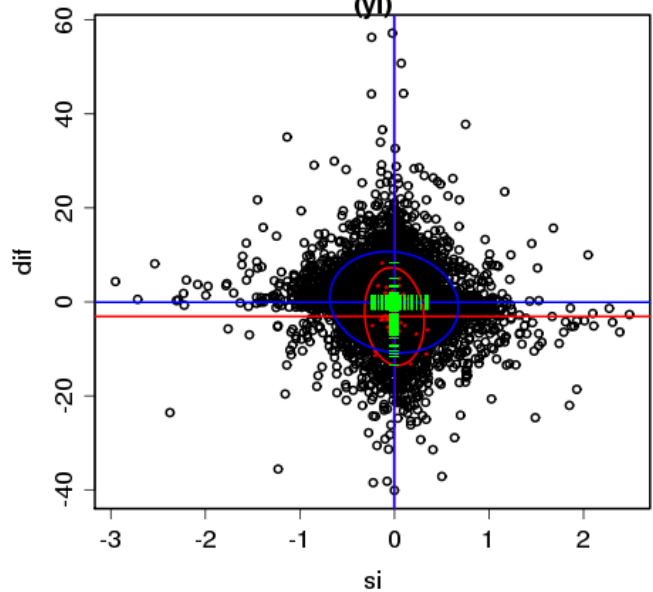

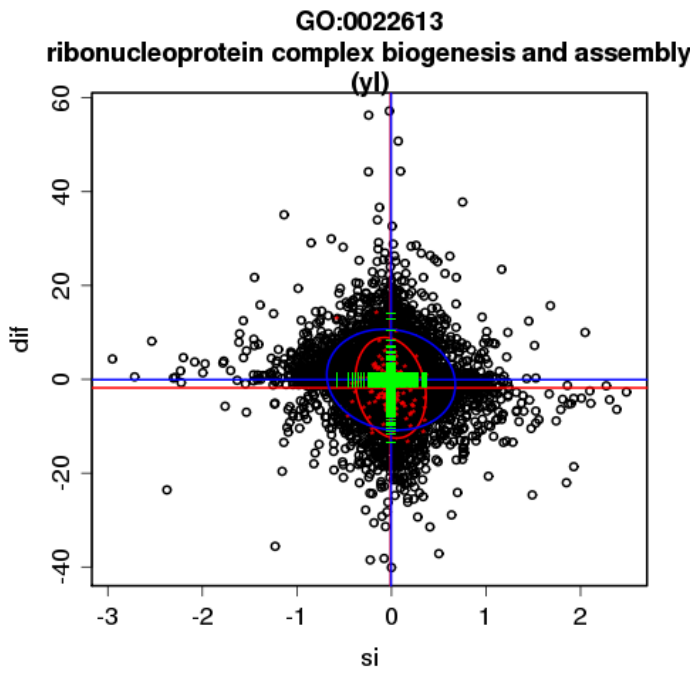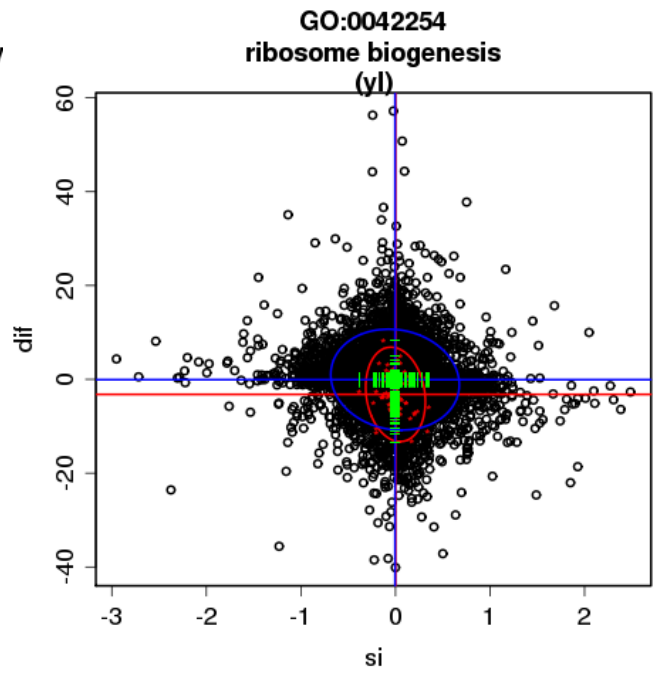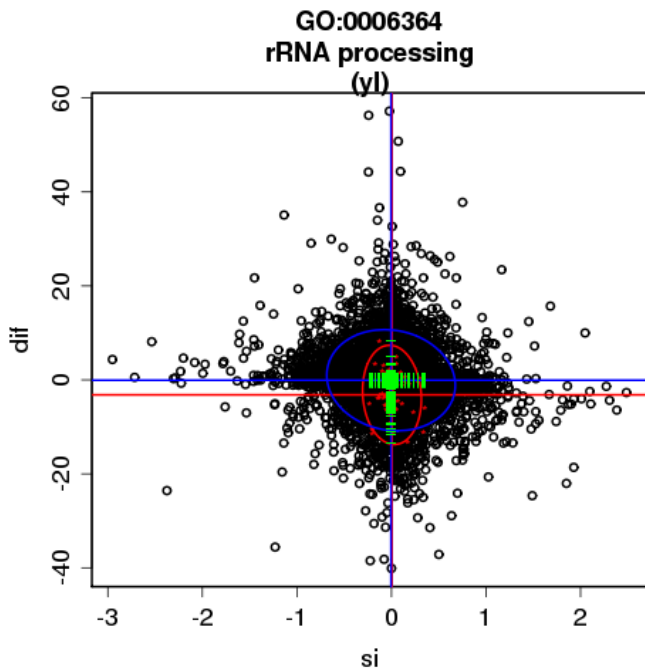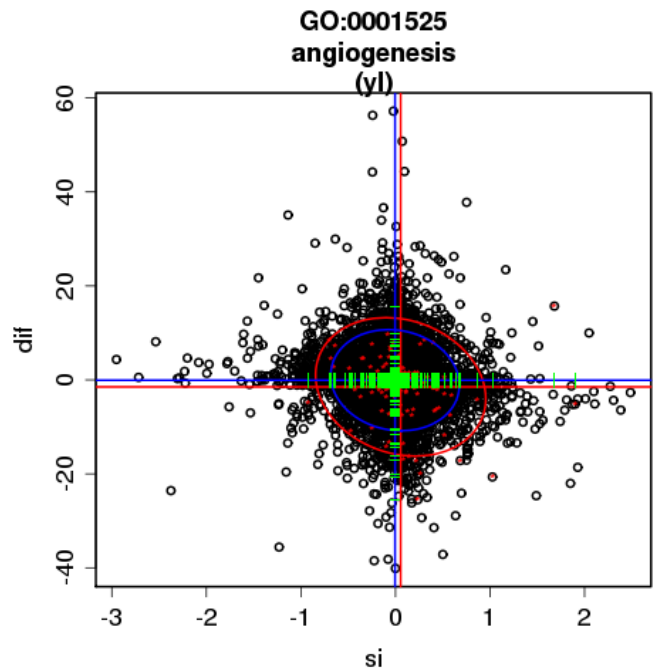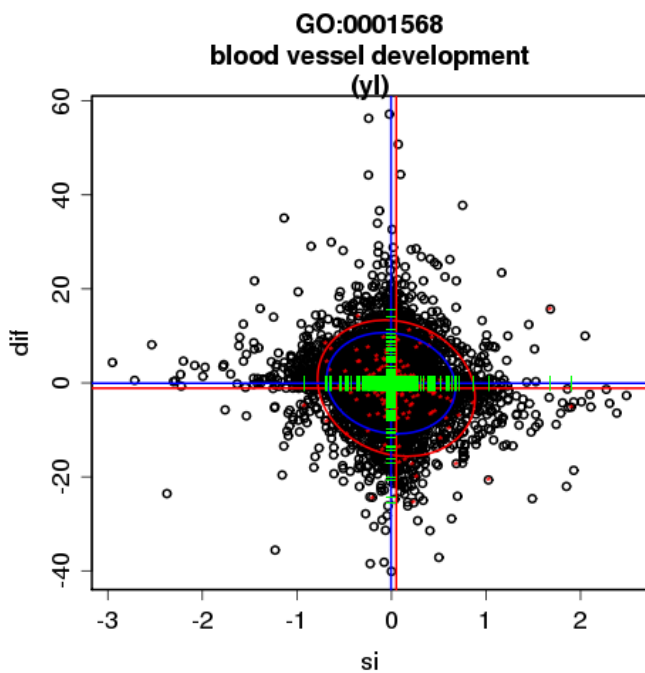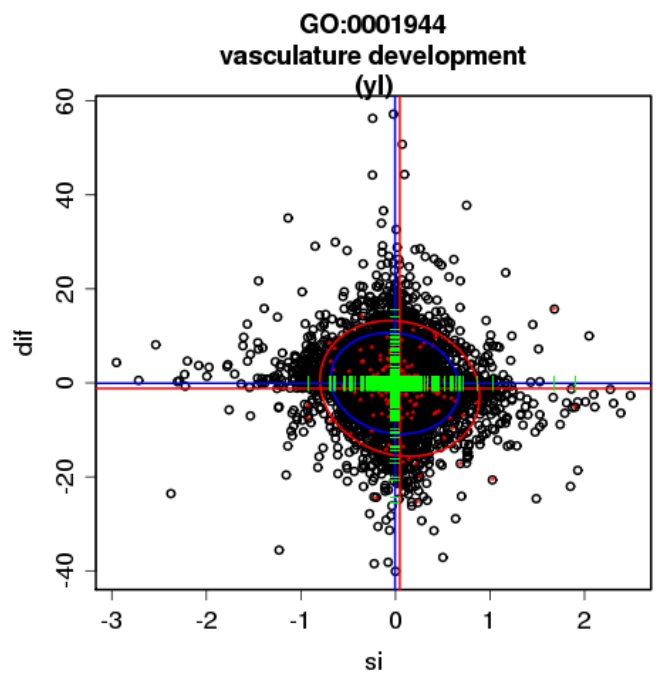

**GO:0048514**  
**blood vessel morphogenesis**  
(yl)

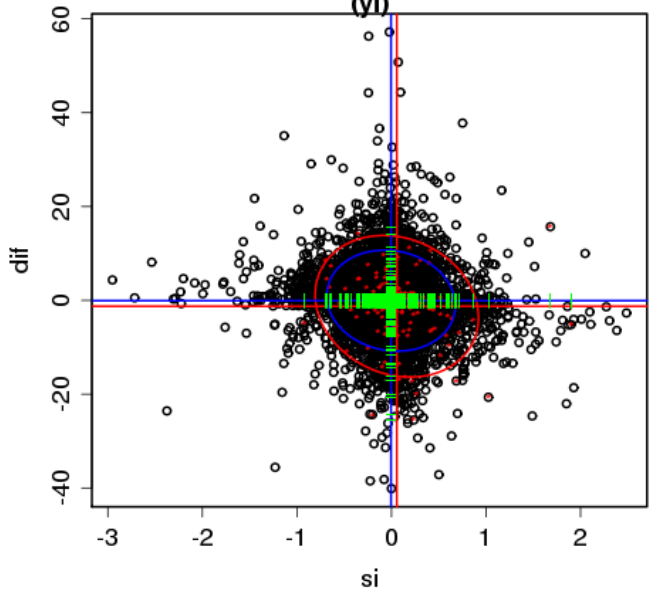

**GO:0048646**  
**anatomical structure formation**  
(yl)

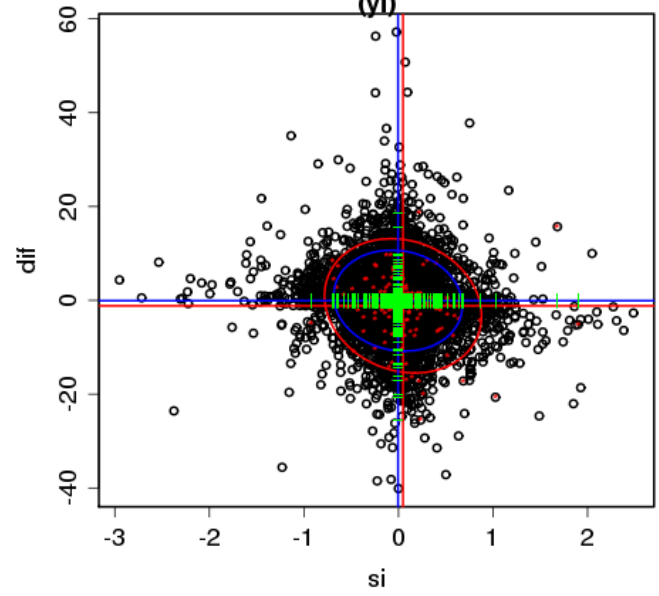

**GO:0007005**  
**mitochondrion organization and biogenesis**  
(yl)

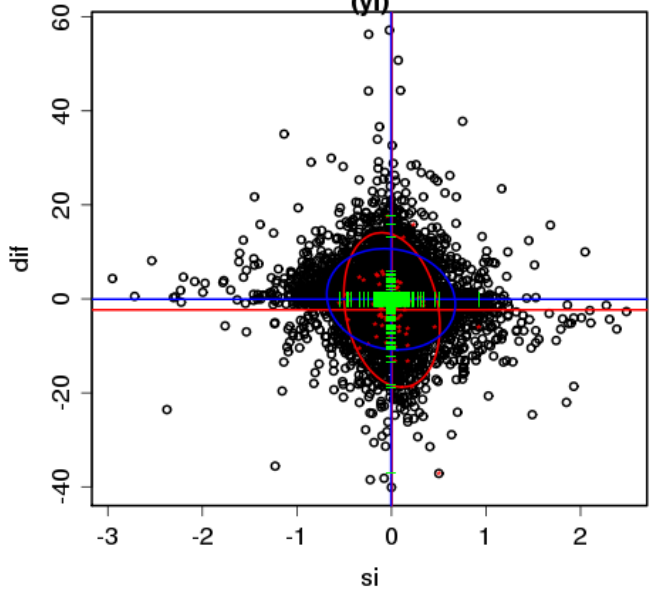

**GO:0033002**  
**muscle cell proliferation**  
(yl)

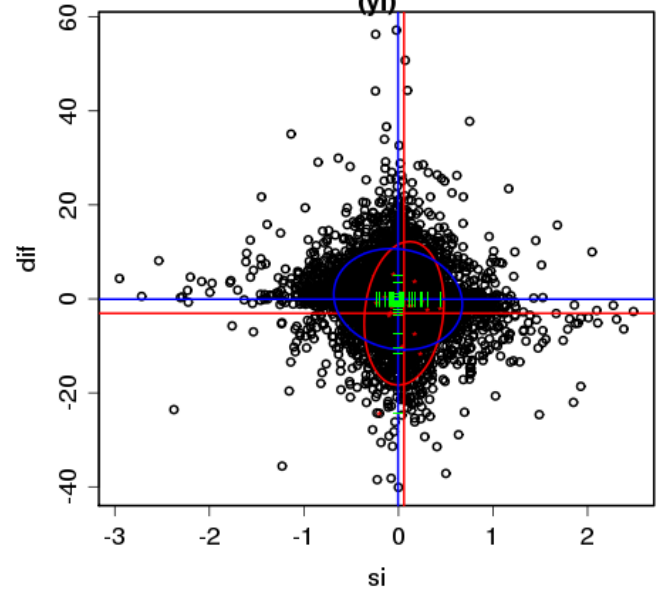

**GO:0048659**  
**smooth muscle cell proliferation**  
(yl)

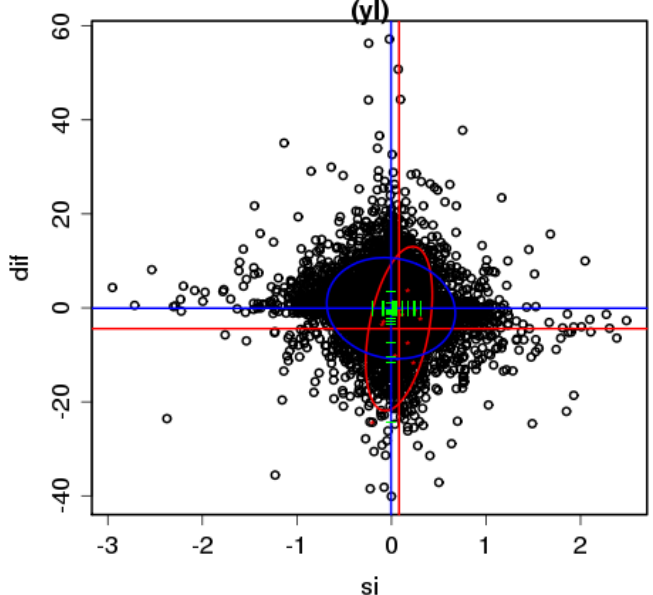

**GO:0048660**  
**regulation of smooth muscle cell proliferation**  
(yl)

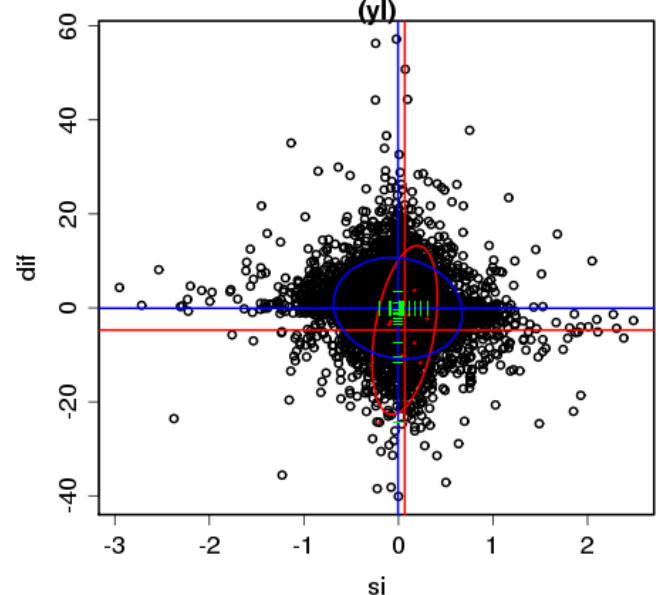

**GO:0006626**  
**protein targeting to mitochondrion**  
(yl)

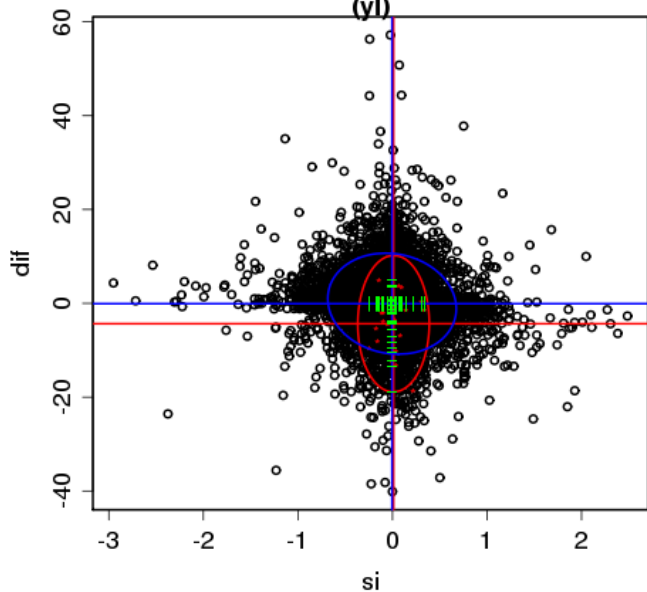

**GO:0001523**  
**retinoid metabolic process**  
(yl)

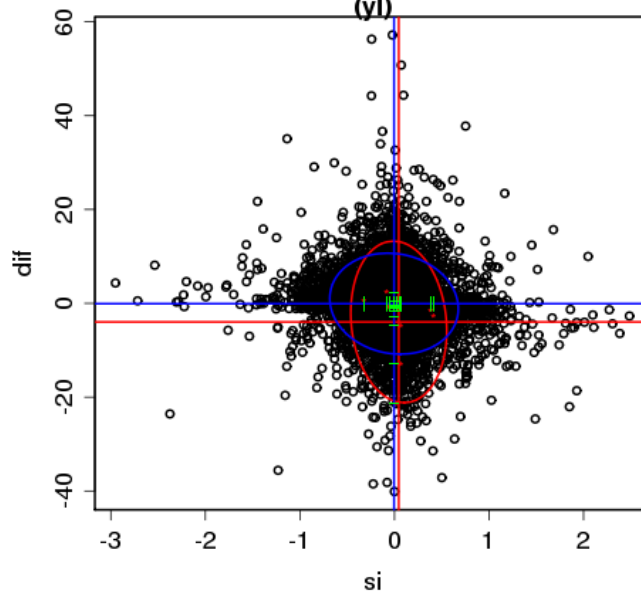

**GO:0006720**  
**isoprenoid metabolic process**  
(yl)

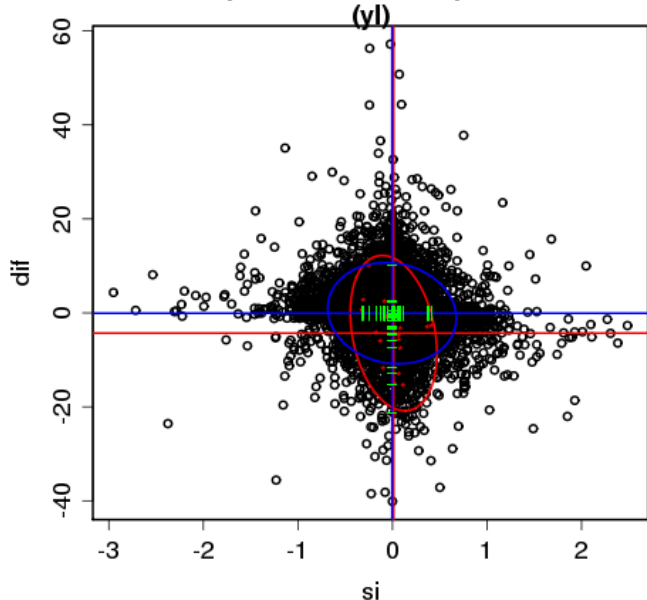

**GO:0006775**  
**fat-soluble vitamin metabolic process**  
(yl)

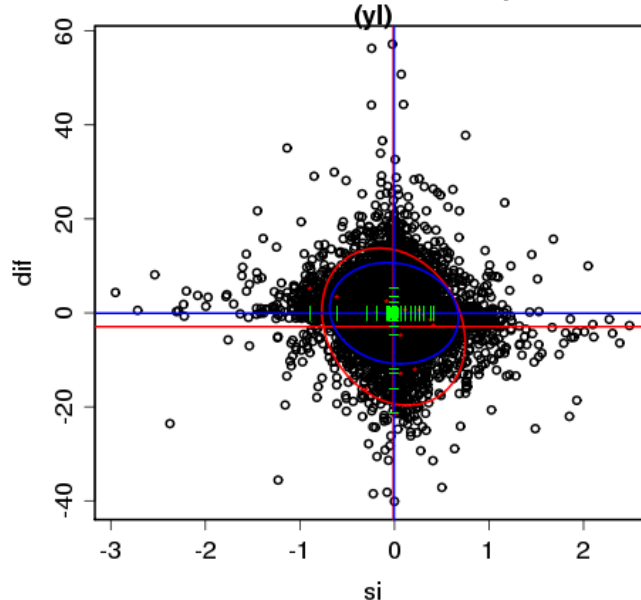

**GO:0006776**  
**vitamin A metabolic process**  
(yl)

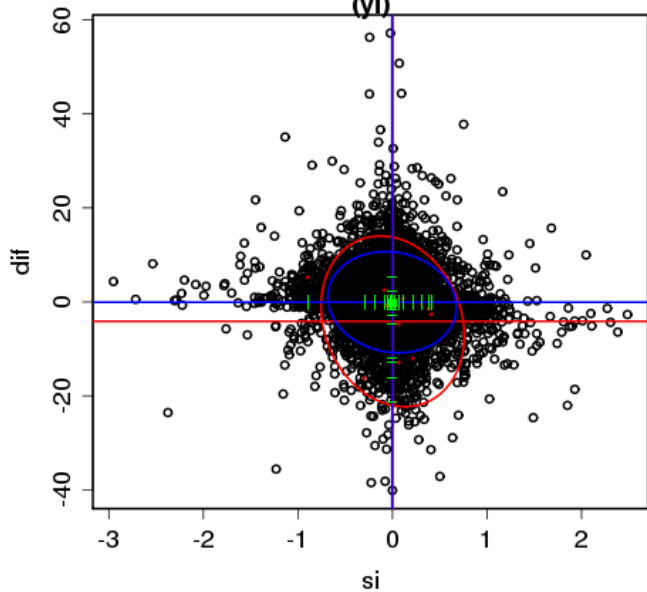

**GO:0016101**  
**diterpenoid metabolic process**  
(yl)

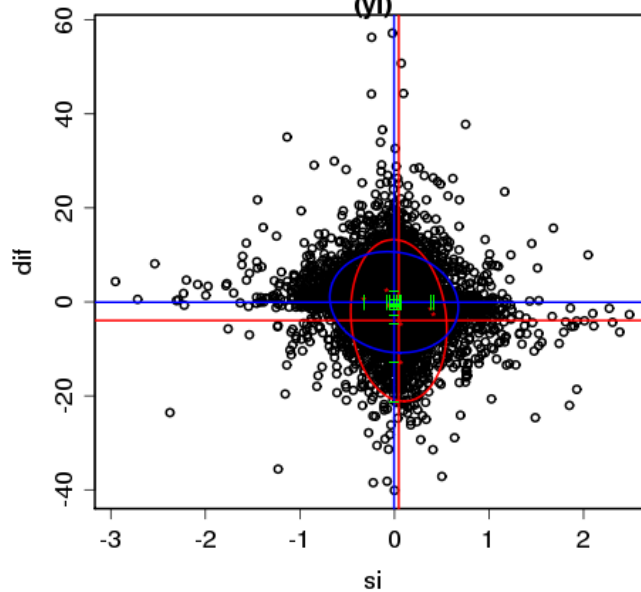



GO:0006119  
oxidative phosphorylation  
(yl)

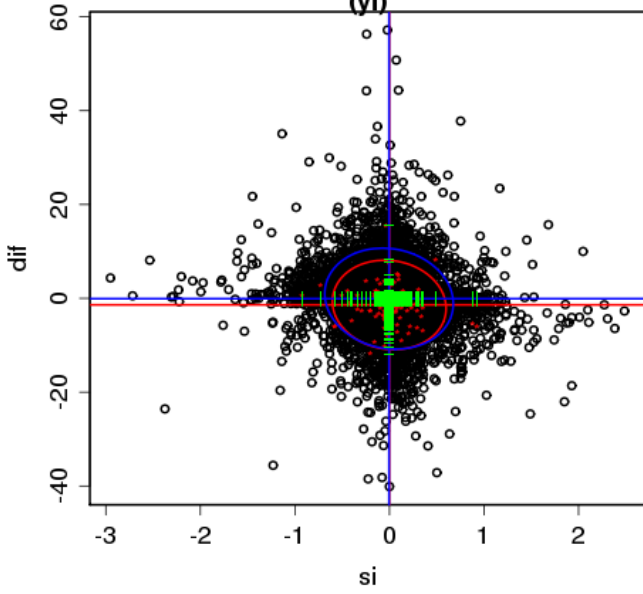

GO:0042773  
ATP synthesis coupled electron transport  
(yl)

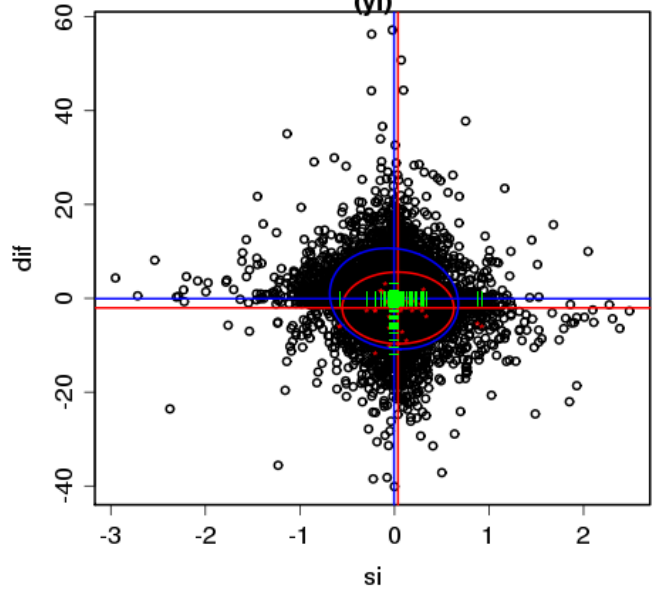

GO:0042775  
organelle ATP synthesis coupled electron transport  
(yl)

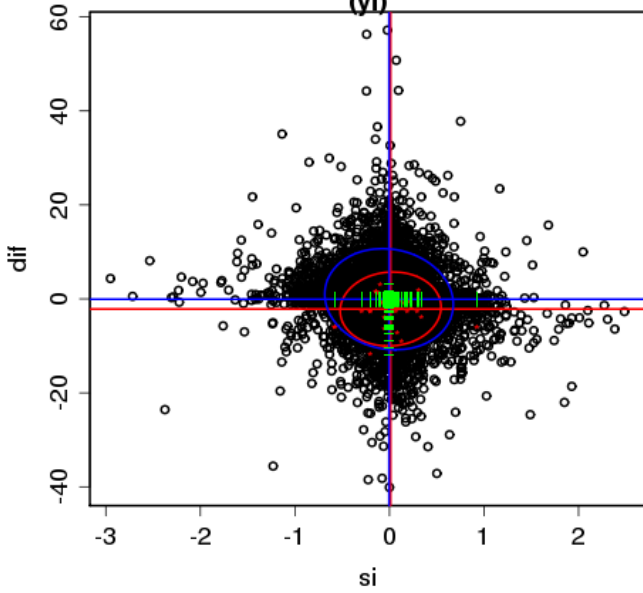

GO:0006120  
mitochondrial electron transport, NADH to ubiquinon  
(yl)

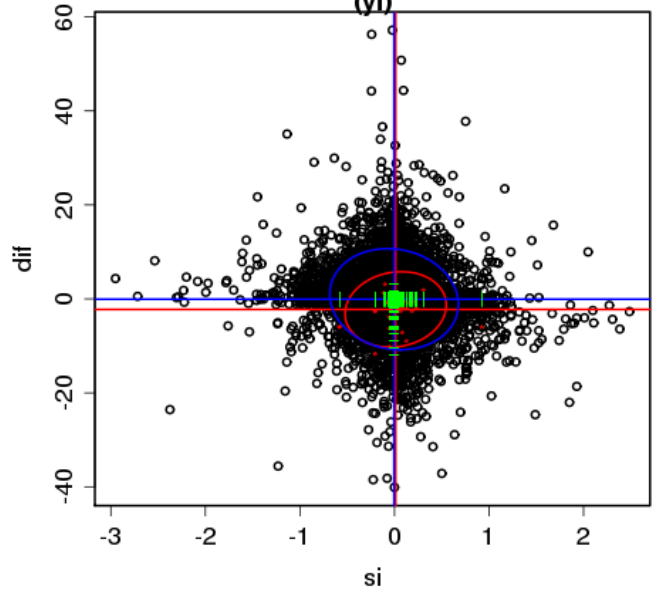

GO:0000226  
microtubule cytoskeleton organization and biogenesis:  
(yl)

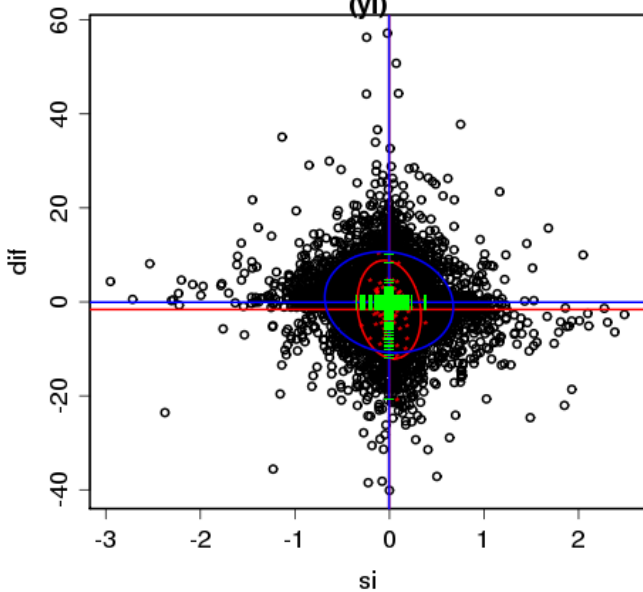

GO:0006084  
acetyl-CoA metabolic process  
(yl)

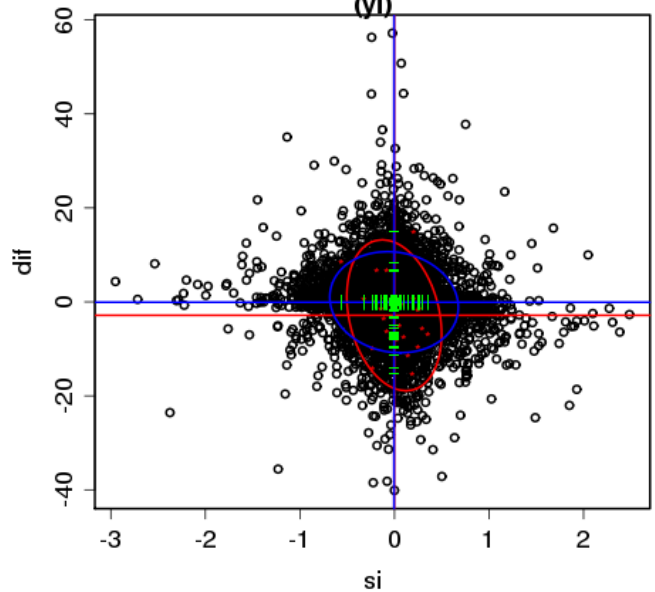



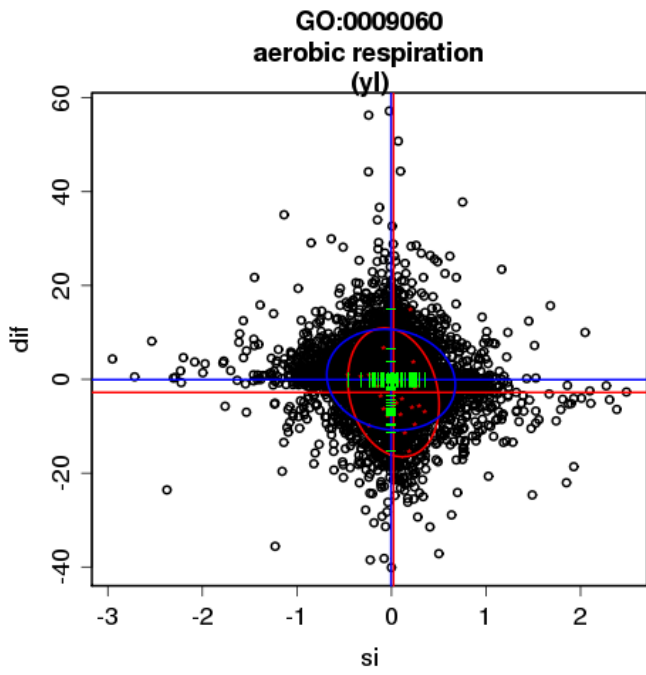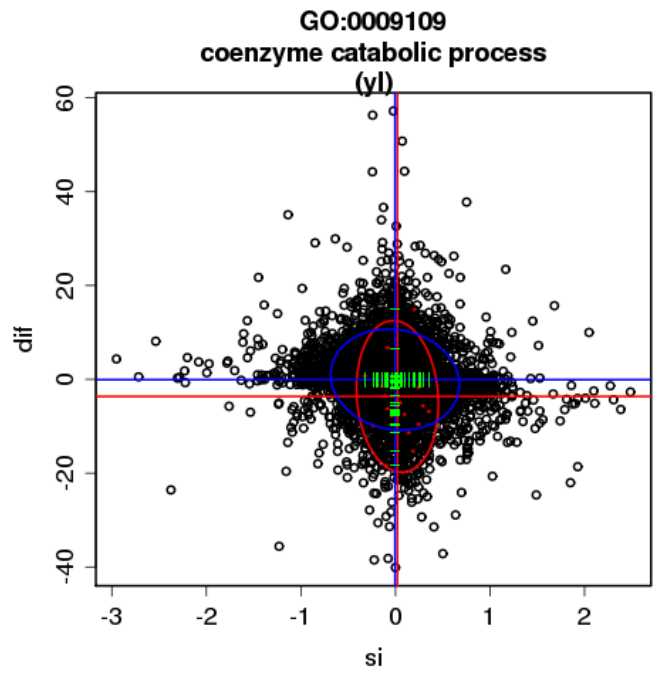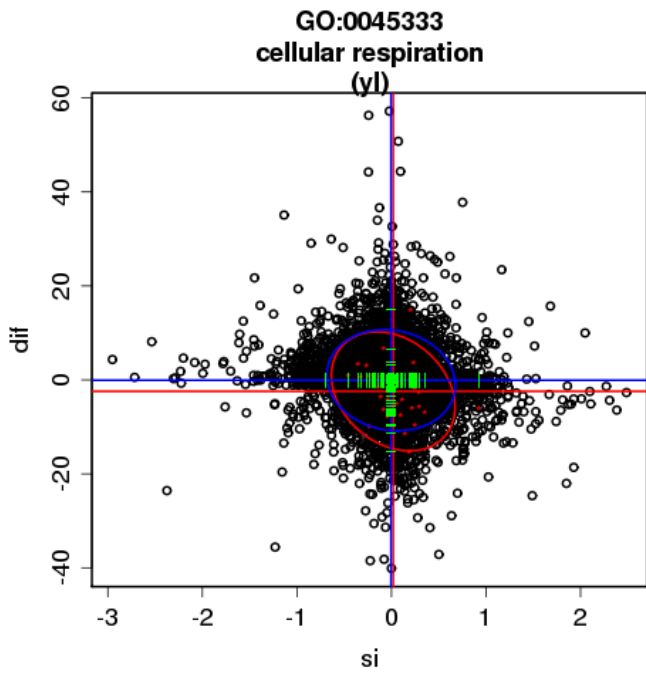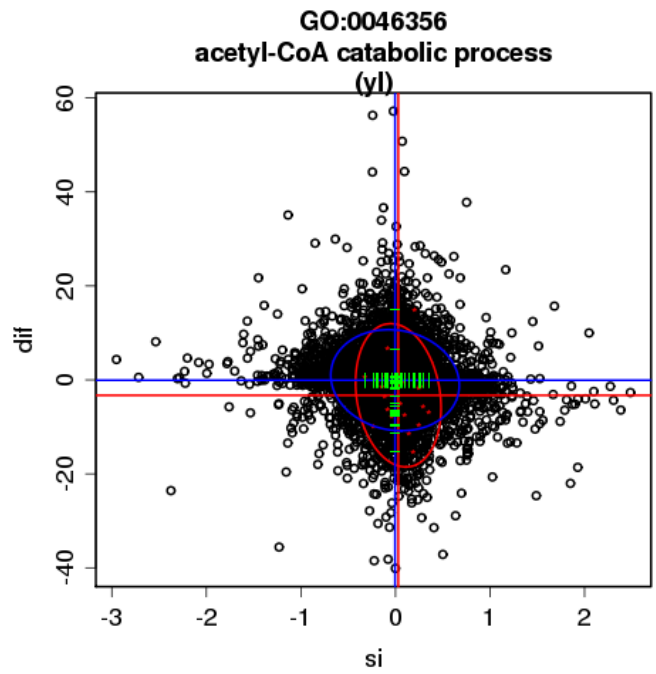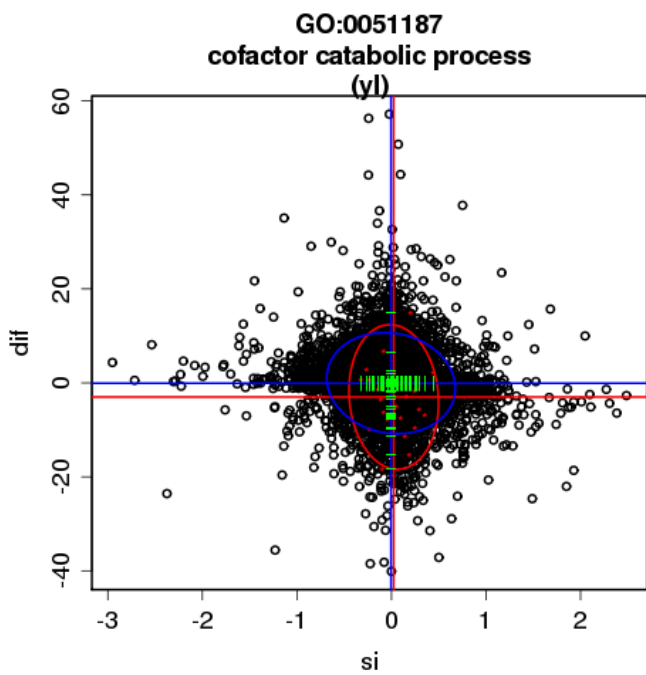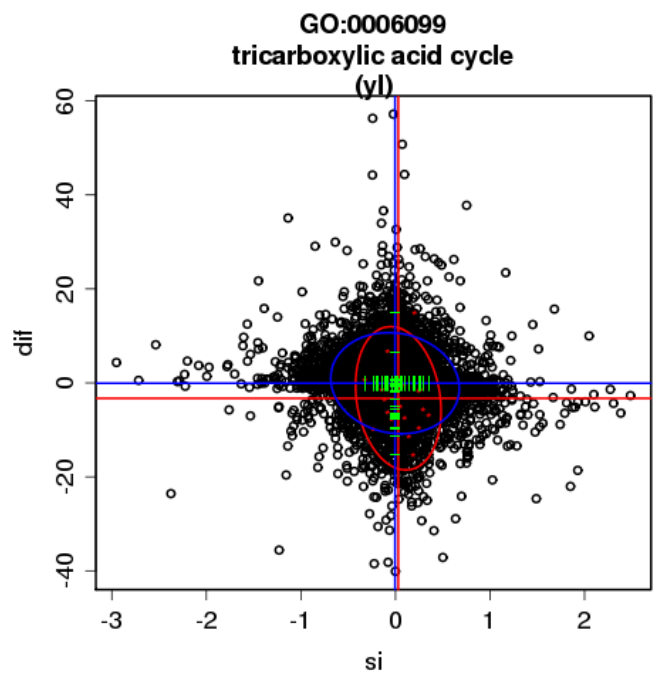

**GO:000070**  
**mitotic sister chromatid segregation**  
(yl)

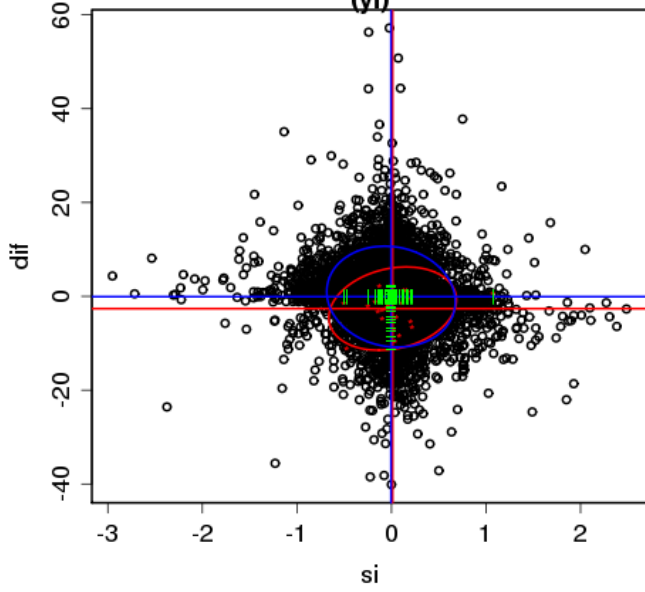

**GO:0000819**  
**sister chromatid segregation**  
(yl)

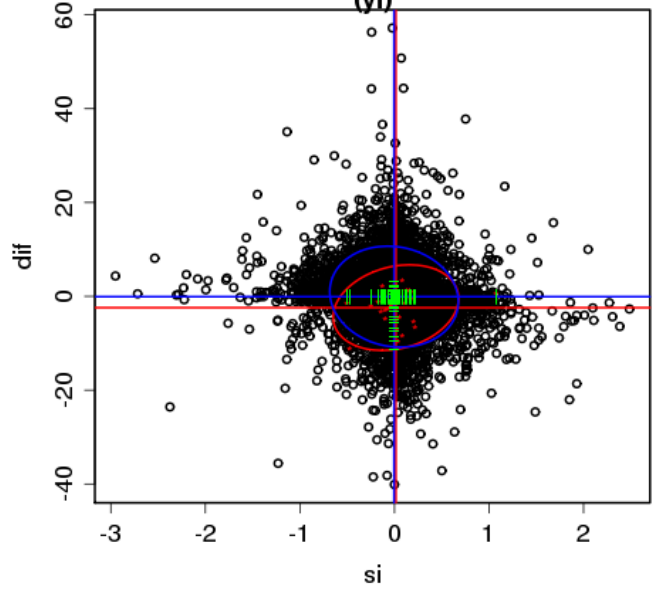

**GO:0007059**  
**chromosome segregation**  
(yl)

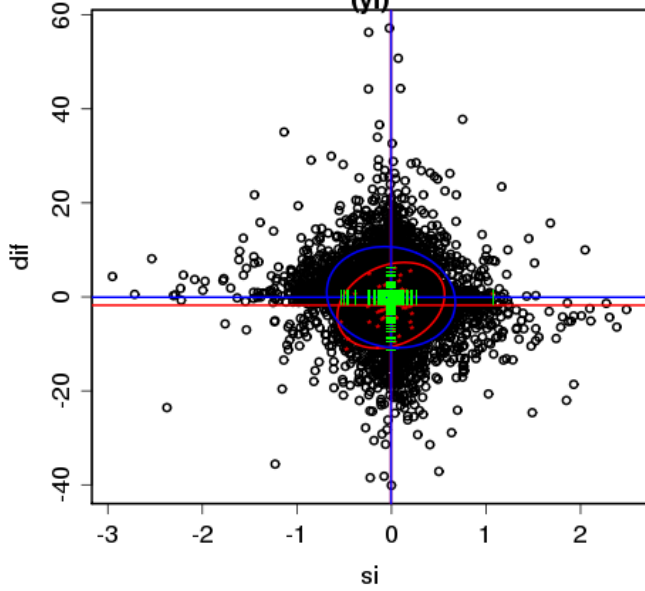

**GO:0008284**  
**positive regulation of cell proliferation**  
(yl)

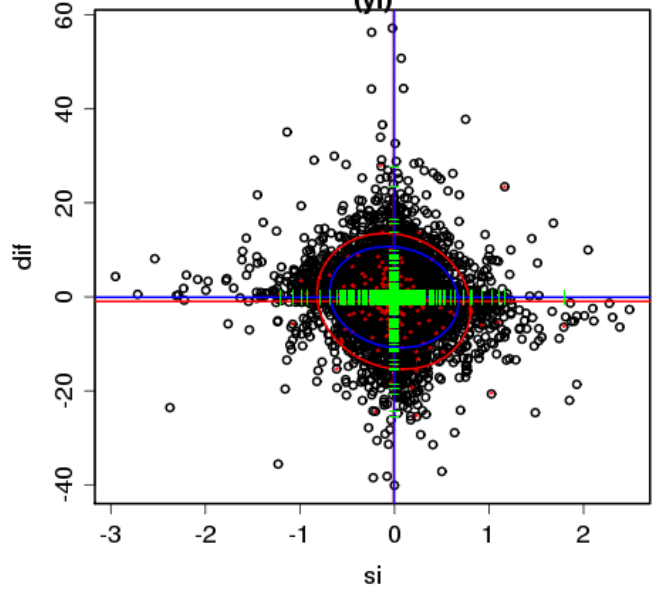

**GO:0030031**  
**cell projection biogenesis**  
(yl)

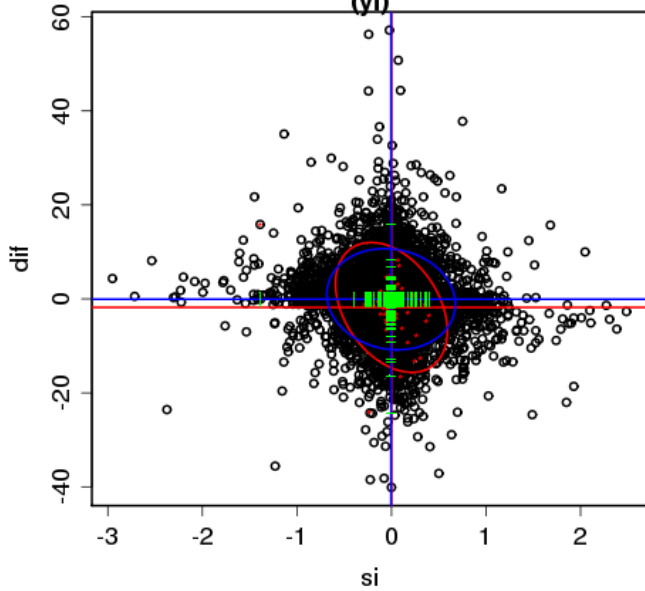

**GO:0033673**  
**negative regulation of kinase activity**  
(yl)

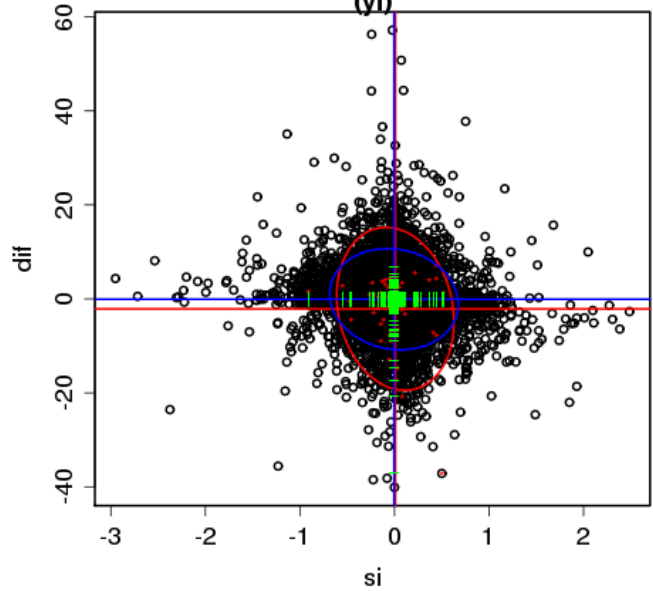

**GO:0043086**  
**negative regulation of catalytic activity**

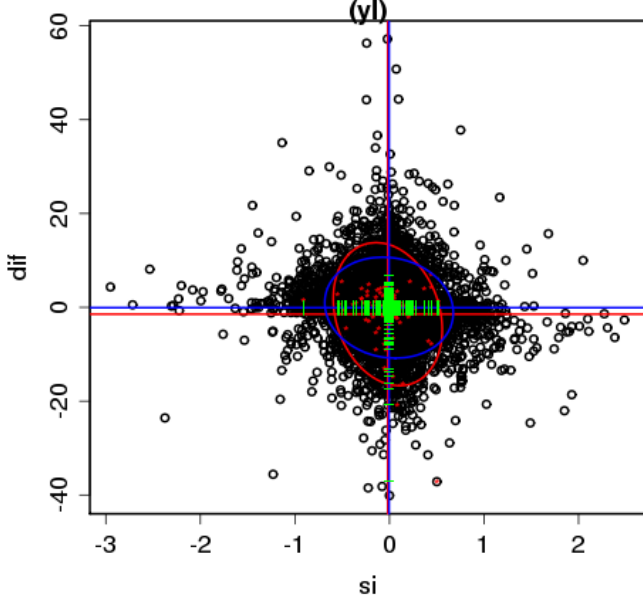

**GO:0051348**  
**negative regulation of transferase activity**

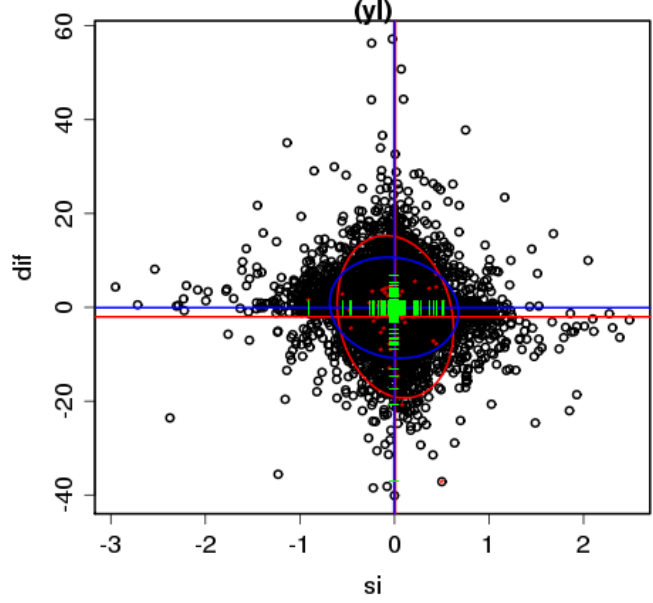

**GO:0006469**  
**negative regulation of protein kinase activity**

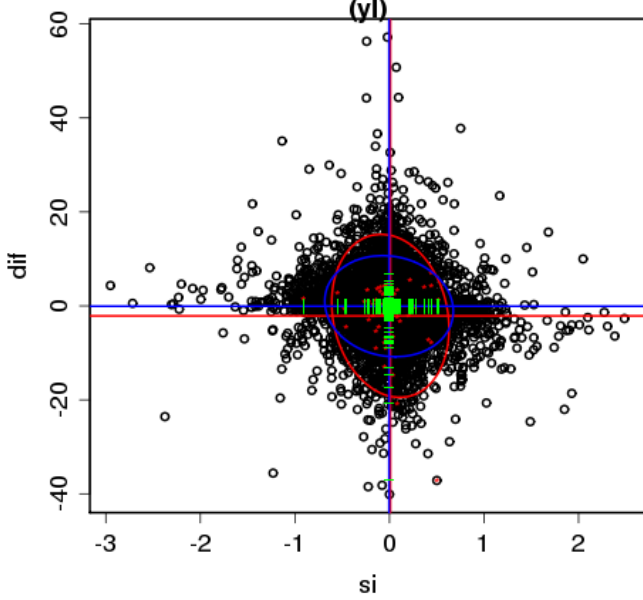

**GO:0043405**  
**regulation of MAP kinase activity**

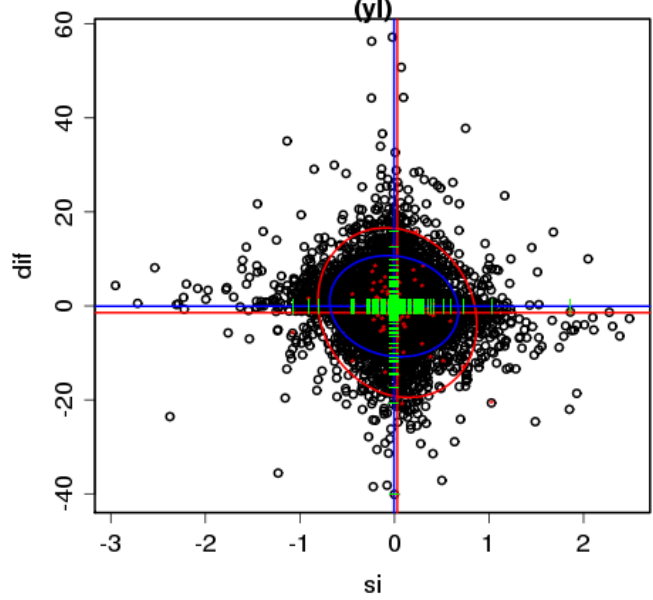

**GO:0009123**  
**nucleoside monophosphate metabolic process**

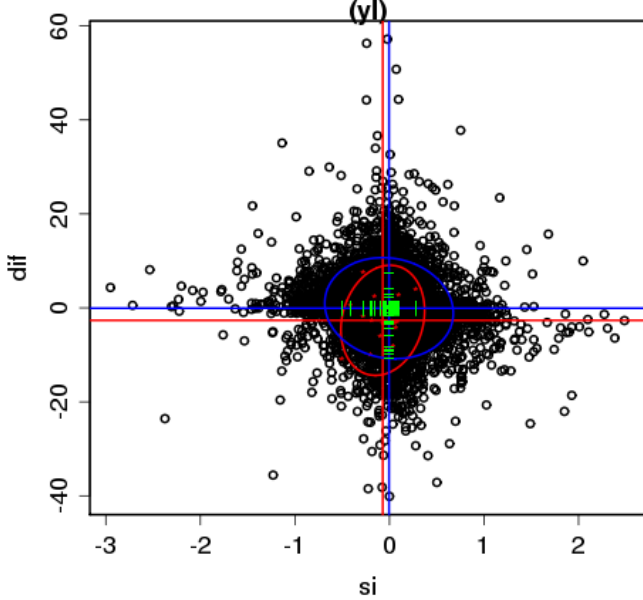

**GO:0009124**  
**nucleoside monophosphate biosynthetic process**

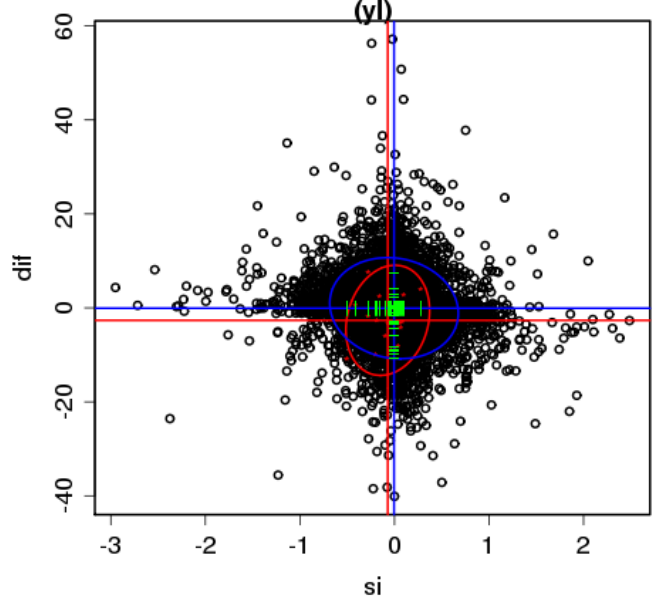

**GO:0051052**  
**regulation of DNA metabolic process**  
(yl)

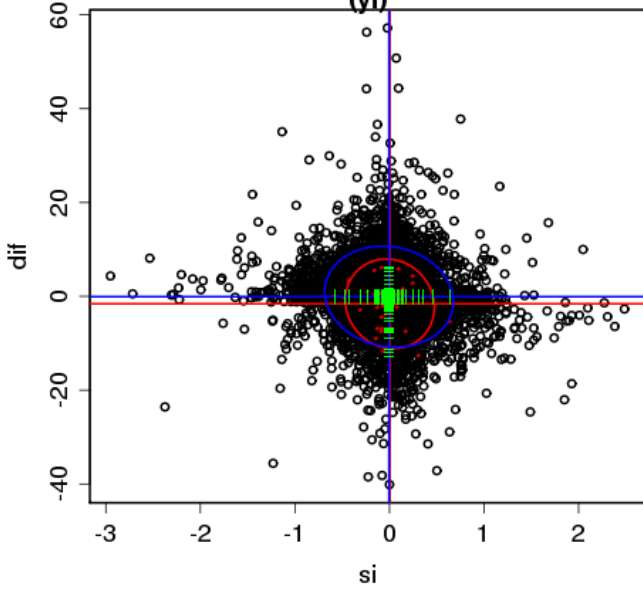

**GO:0042330**  
**taxis**  
(yl)

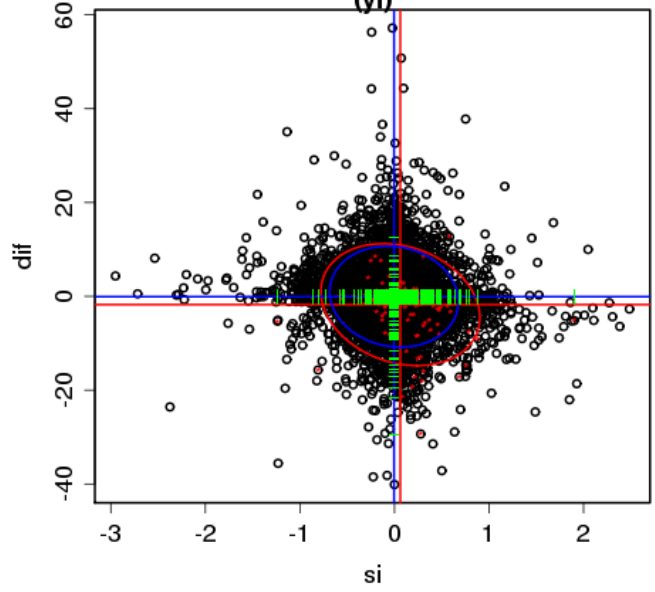

**GO:0006935**  
**chemotaxis**  
(yl)

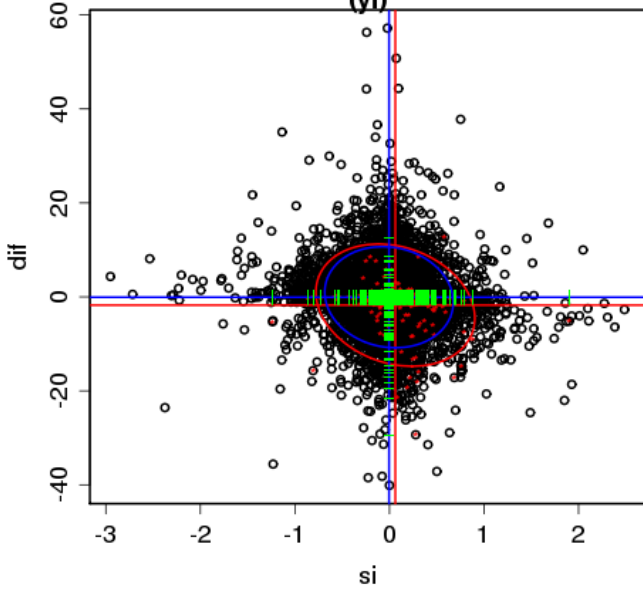

**GO:0018149**  
**peptide cross-linking**  
(yl)

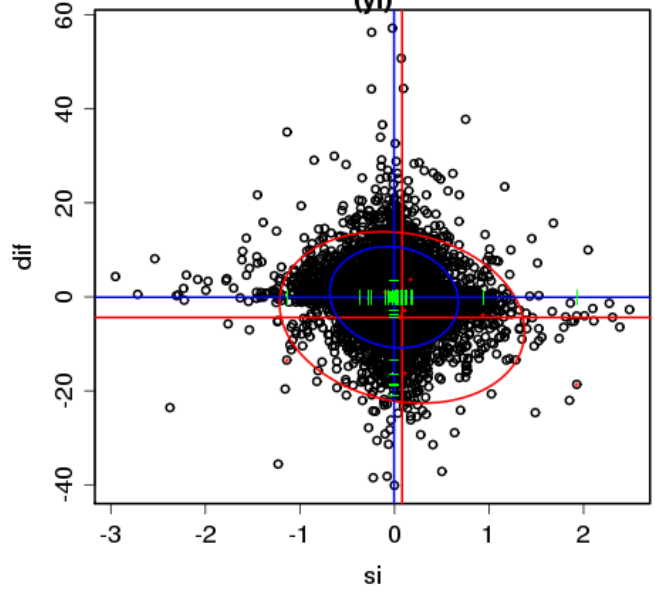

**GO:0030216**  
**keratinocyte differentiation**  
(yl)

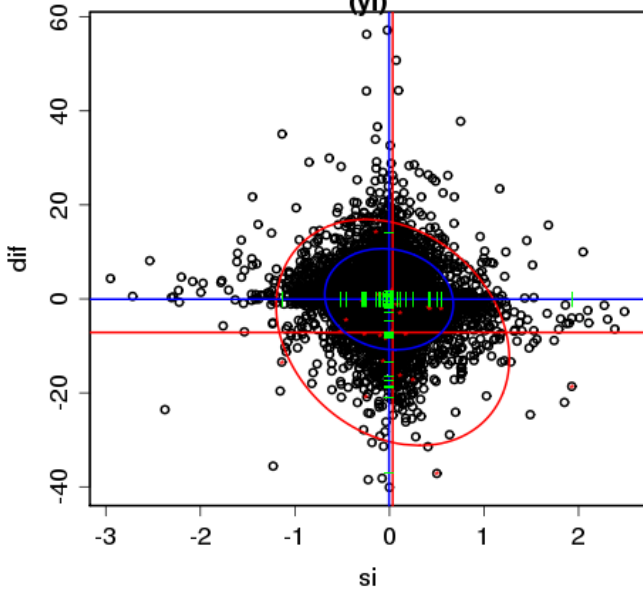

**GO:0000079**  
**regulation of cyclin-dependent protein kinase activity**  
(yl)

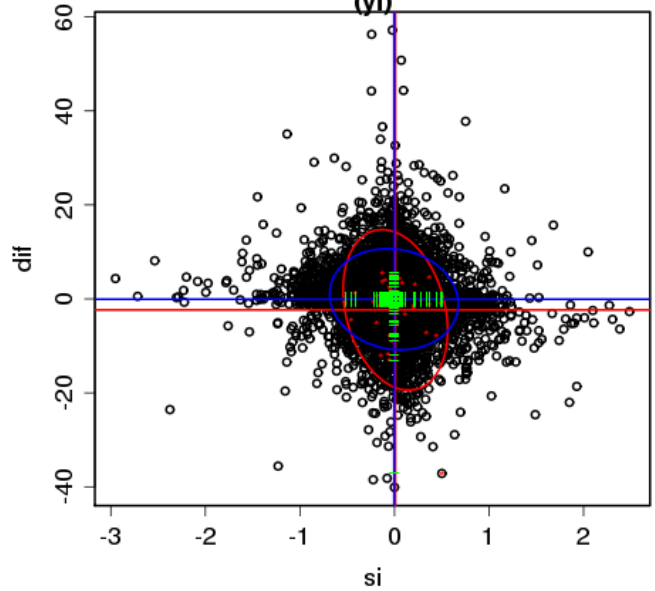

GO:0006100

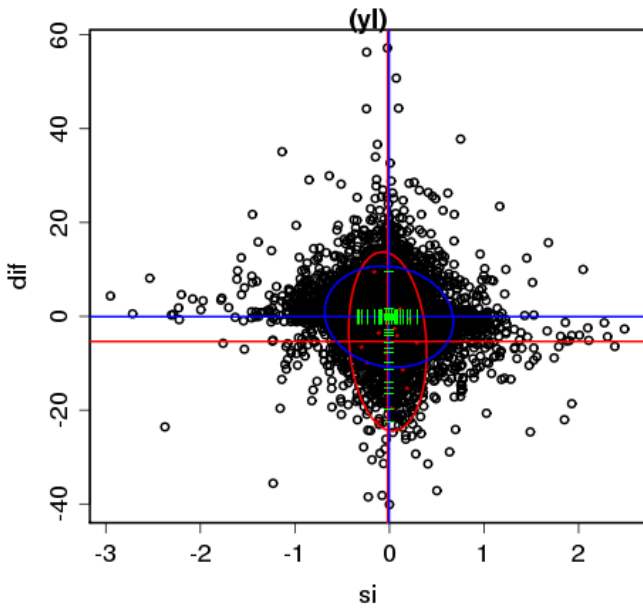

GO:0000059

protein import into nucleus, docking

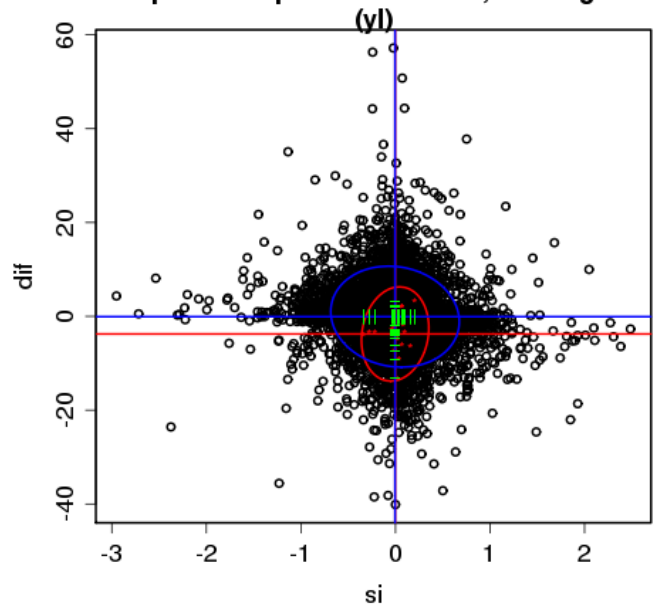

GO:0031099

regeneration

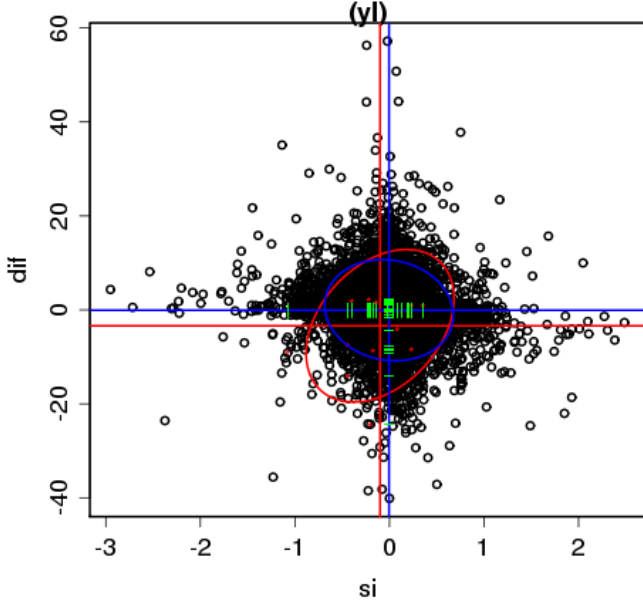

GO:0031109

microtubule polymerization or depolymerization

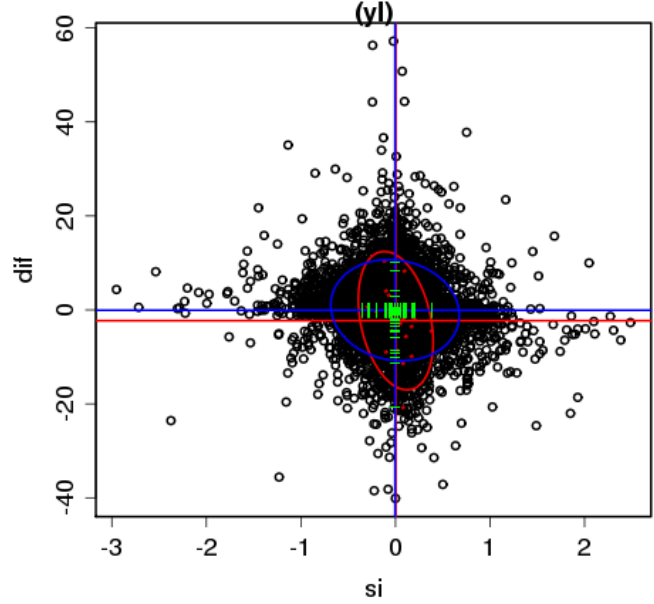

GO:0006695

cholesterol biosynthetic process

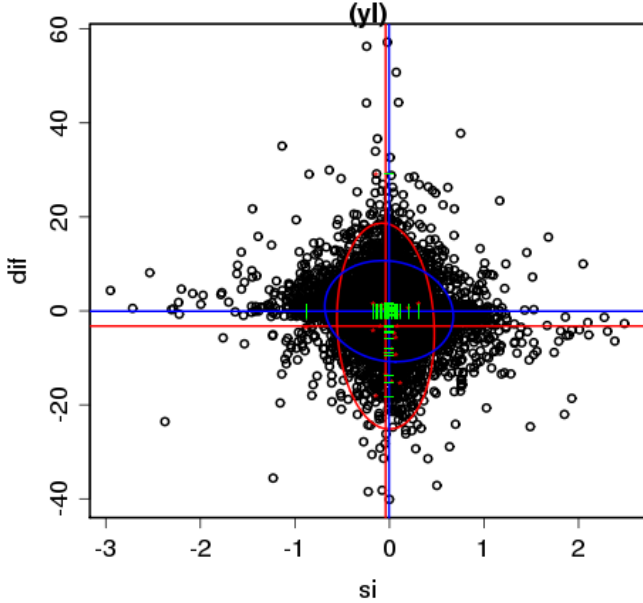

GO:0016126

sterol biosynthetic process

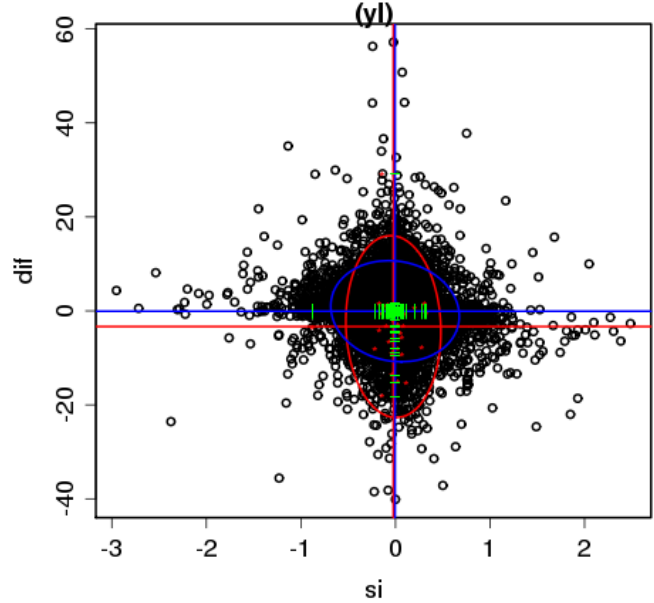

**GO:0001836**  
**release of cytochrome c from mitochondria**

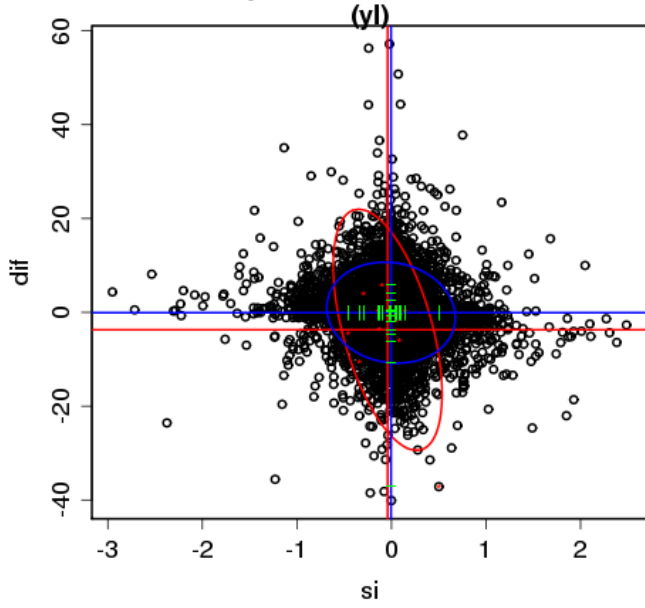

**GO:0046112**  
**nucleobase biosynthetic process**

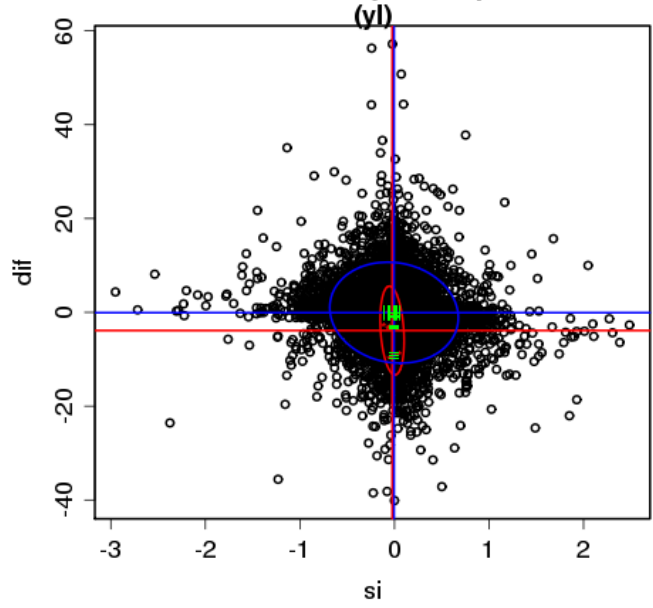

**GO:0006690**  
**icosanoid metabolic process**

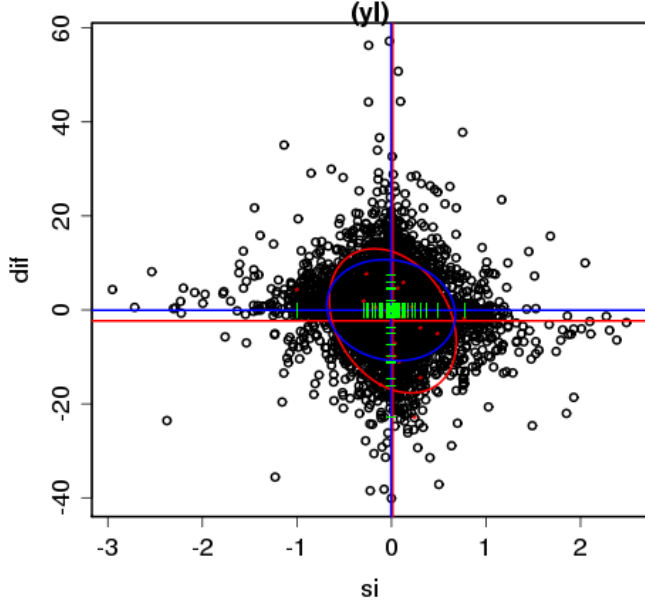

**GO:0009166**  
**nucleotide catabolic process**

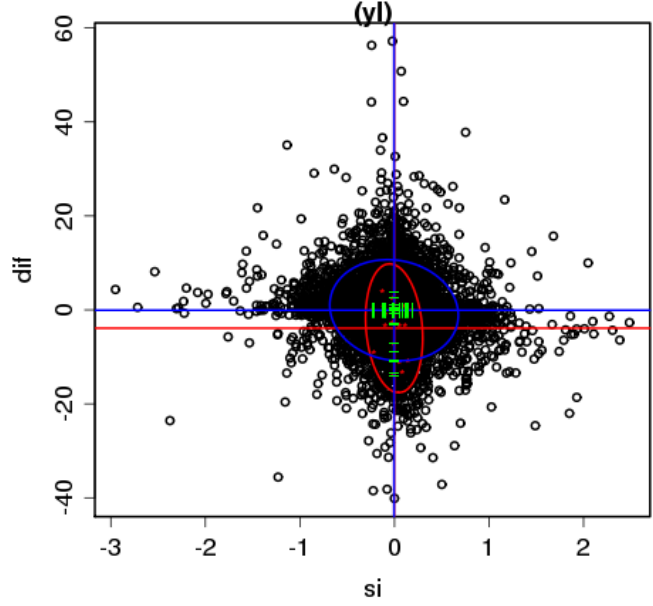

**GO:0006633**  
**fatty acid biosynthetic process**

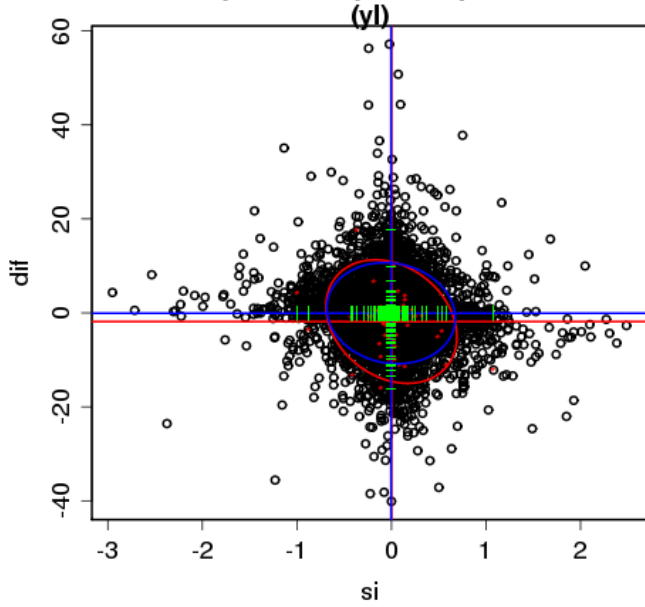

**GO:0032886**  
**regulation of microtubule-based process**

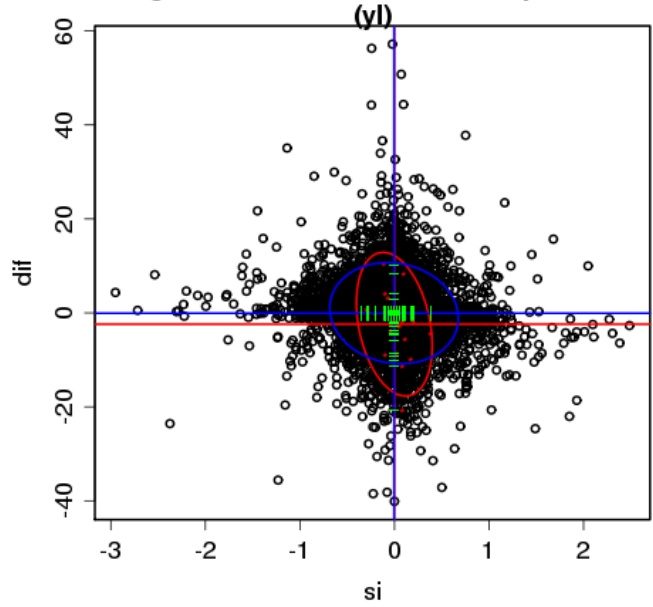

**GO:0051346**  
**negative regulation of hydrolase activity**  
(yl)

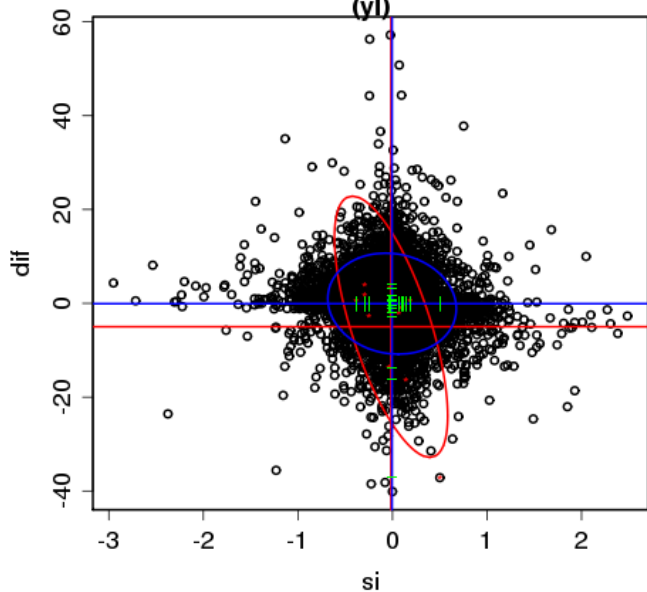

**GO:0008299**  
**isoprenoid biosynthetic process**  
(yl)

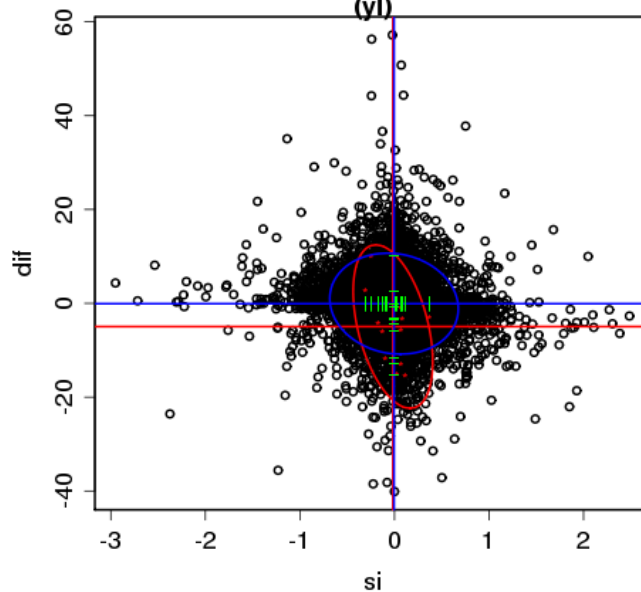

**GO:0001937**  
**negative regulation of endothelial cell proliferation**  
(yl)

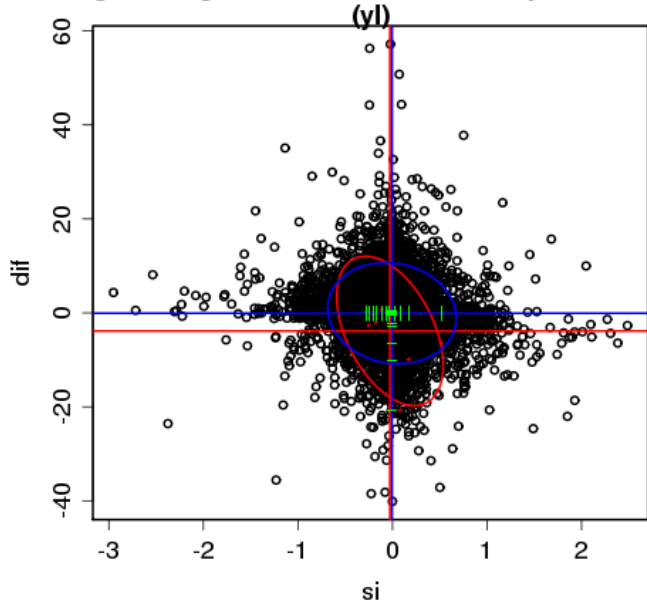

**GO:0007250**  
**activation of NF-kappaB-inducing kinase activity**  
(yl)

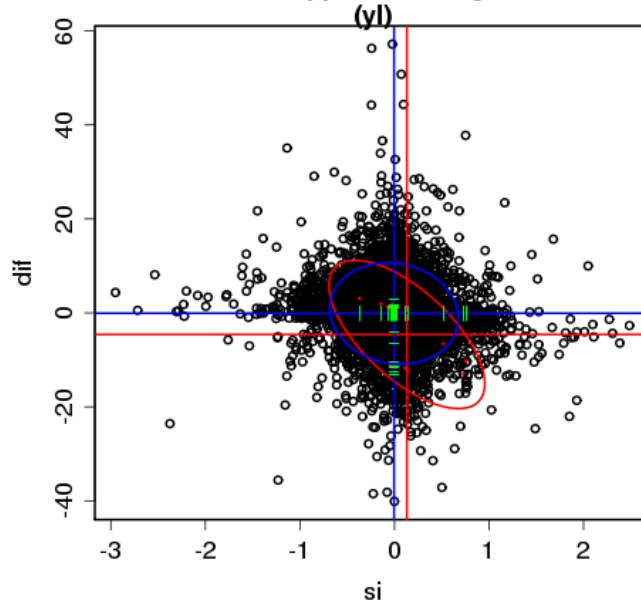

**GO:0032602**  
**chemokine production**  
(yl)

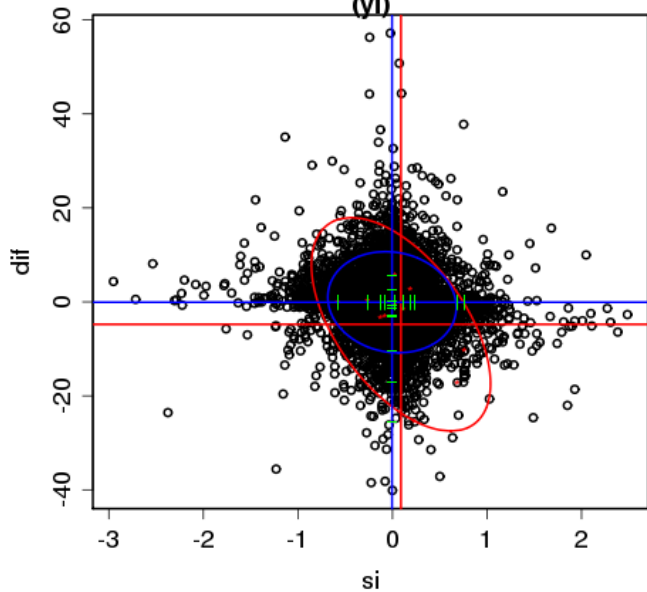

**GO:0050755**  
**chemokine metabolic process**  
(yl)

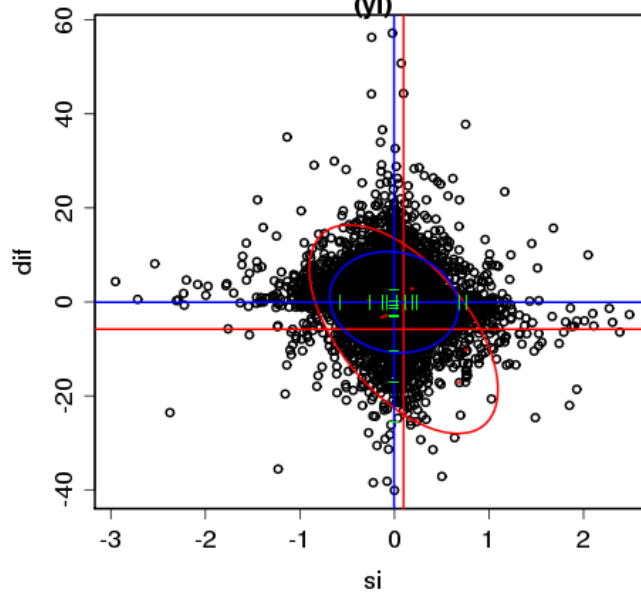



**GO:0042033**  
**chemokine biosynthetic process**  
(yl)

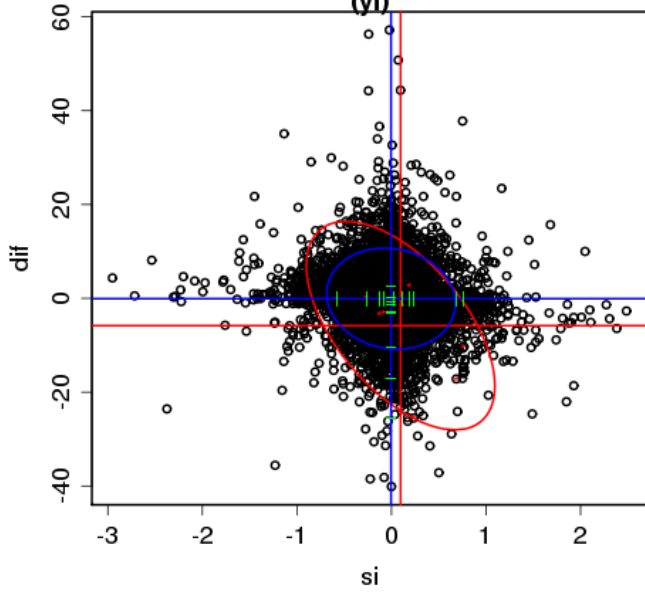

**GO:0022408**  
**negative regulation of cell-cell adhesion**  
(yl)

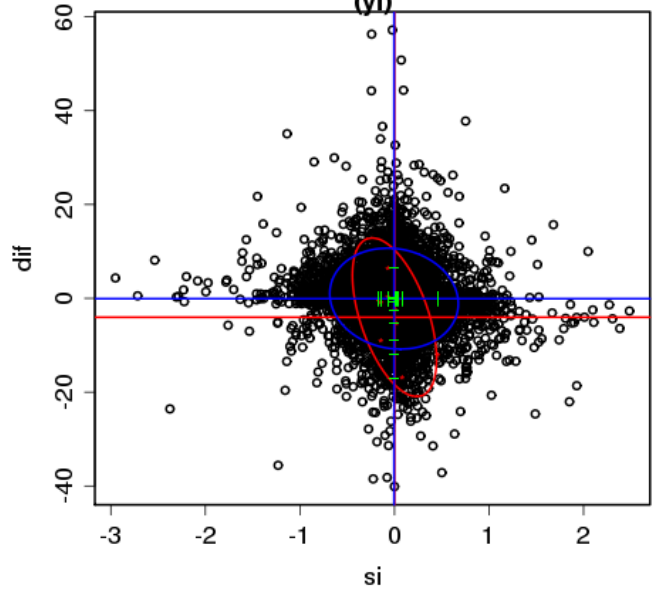

**GO:0045428**  
**regulation of nitric oxide biosynthetic process**  
(yl)

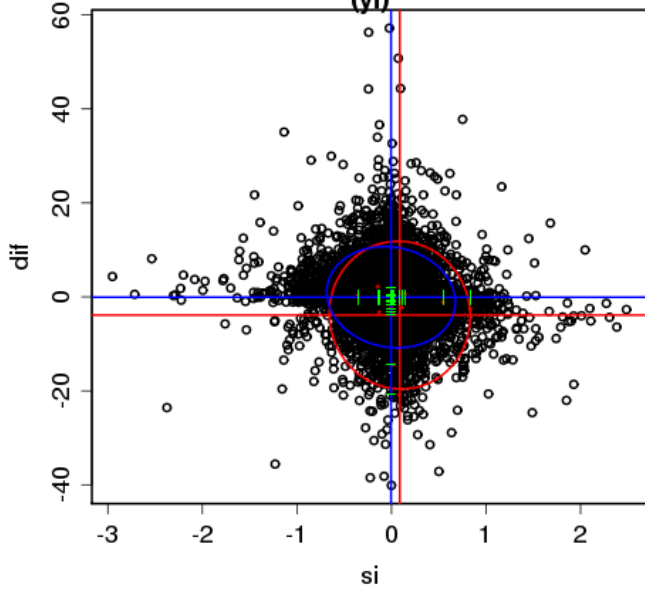

**GO:0043407**  
**negative regulation of MAP kinase activity**  
(yl)

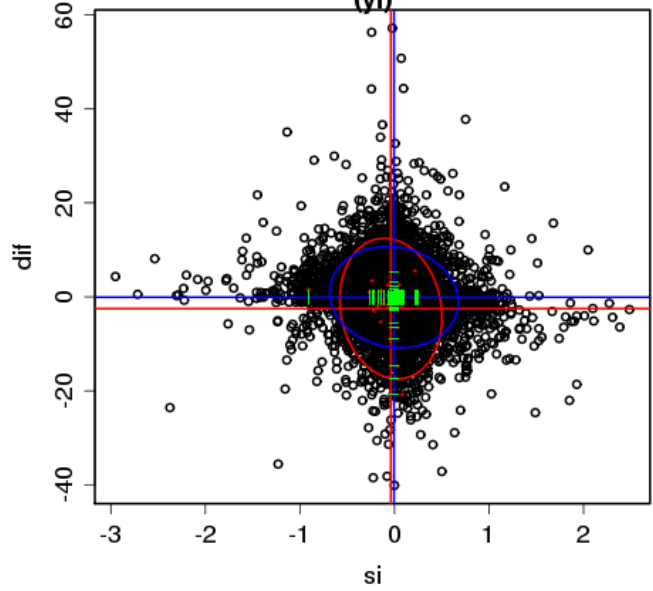



# Combined functional profiling of alternative splicing and differential gene expression using KEGG pathways

18 significant modules

LOR indicates Log Odds Ratio of the coefficient or the interaction

p indicates FDR adjusted p-value

|          | LOR si | LOR dif | LOR In-ter | p si | p dif | p Inter | pattern | name                                      |
|----------|--------|---------|------------|------|-------|---------|---------|-------------------------------------------|
| hsa04670 | -0.09  | 0.39    | 0.09       | 0.98 | 0.01  | 1.00    | yh      | Leukocyte transendothelial migration      |
| hsa04530 | -0.06  | 0.31    | 0.11       | 0.98 | 0.04  | 1.00    | yh      | Tight junction                            |
| hsa04660 | -0.09  | 0.33    | 0.06       | 0.98 | 0.05  | 1.00    | yh      | T cell receptor signaling pathway         |
| hsa04664 | 0.36   | 0.37    | -0.02      | 0.59 | 0.05  | 1.00    | yh      | Fc epsilon RI signaling pathway           |
| hsa00562 | 0.12   | 0.38    | -0.02      | 0.98 | 0.04  | 1.00    | yh      | Inositol phosphate metabolism             |
| hsa04210 | -0.09  | -0.48   | -0.04      | 0.98 | 0.00  | 1.00    | yl      | Apoptosis                                 |
| hsa04512 | -0.18  | -0.49   | -0.03      | 0.98 | 0.01  | 1.00    | yl      | ECM-receptor interaction                  |
| hsa04060 | 0.33   | -0.31   | 0.02       | 0.06 | 0.01  | 1.00    | yl      | Cytokine-cytokine receptor interaction    |
| hsa04360 | -0.36  | -0.40   | -0.05      | 0.45 | 0.04  | 1.00    | yl      | Axon guidance                             |
| hsa01040 | -0.31  | -0.60   | -0.02      | 0.98 | 0.04  | 1.00    | yl      | Biosynthesis of unsaturated fatty acids   |
| hsa00220 | 0.03   | -0.66   | -0.00      | 0.98 | 0.00  | 1.00    | yl      | Urea cycle and metabolism of amino groups |
| hsa04940 | 0.48   | -0.50   | 0.05       | 0.45 | 0.03  | 1.00    | yl      | Type I diabetes mellitus                  |
| hsa00010 | -0.02  | -0.45   | 0.03       | 0.98 | 0.05  | 1.00    | yl      | Glycolysis / Gluconeogenesis              |
| hsa00620 | -0.41  | -0.73   | -0.04      | 0.98 | 0.00  | 1.00    | yl      | Pyruvate metabolism                       |
| hsa00640 | 0.01   | -0.69   | 0.01       | 0.99 | 0.00  | 1.00    | yl      | Propanoate metabolism                     |
| hsa00903 | -0.19  | -0.68   | -0.03      | 0.98 | 0.00  | 1.00    | yl      | Limonene and pinene degradation           |
| hsa00100 | 0.08   | -0.72   | -0.00      | 0.98 | 0.00  | 1.00    | yl      | Biosynthesis of steroids                  |
| hsa00020 | 0.33   | -0.63   | 0.05       | 0.98 | 0.00  | 1.00    | yl      | Citrate cycle (TCA cycle)                 |

Table 1: LOR: log odds ratio; p: adjusted p-value FDR

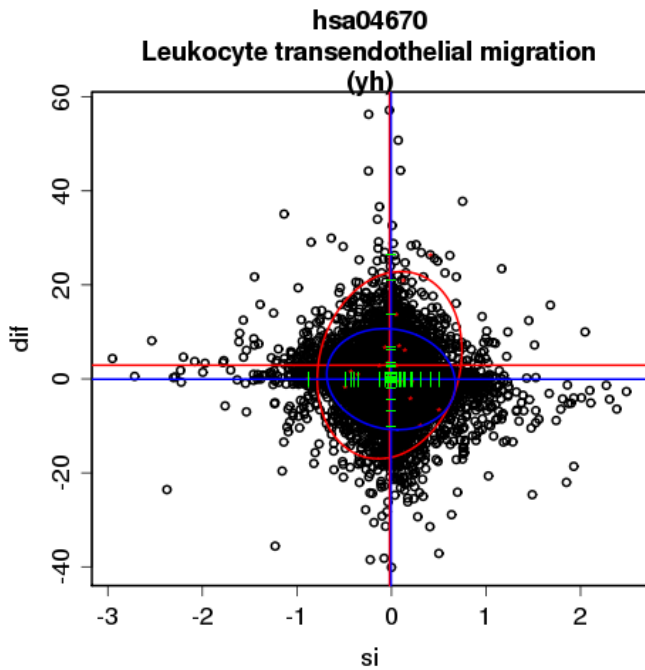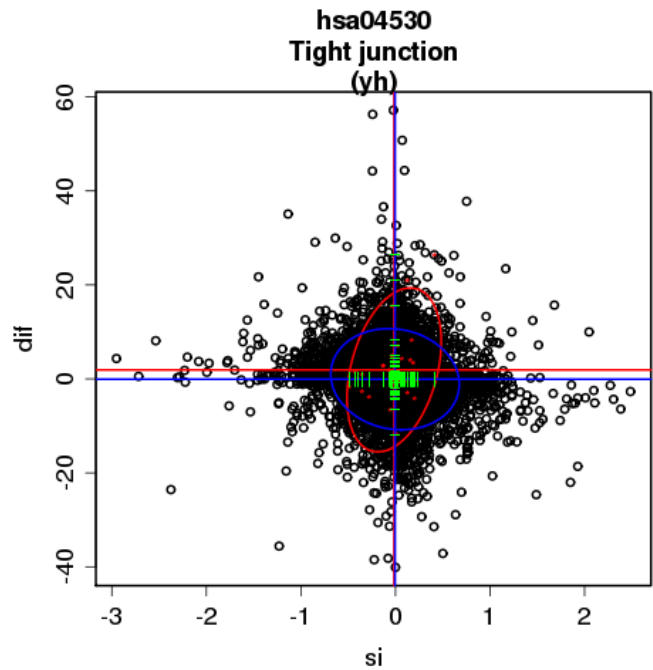

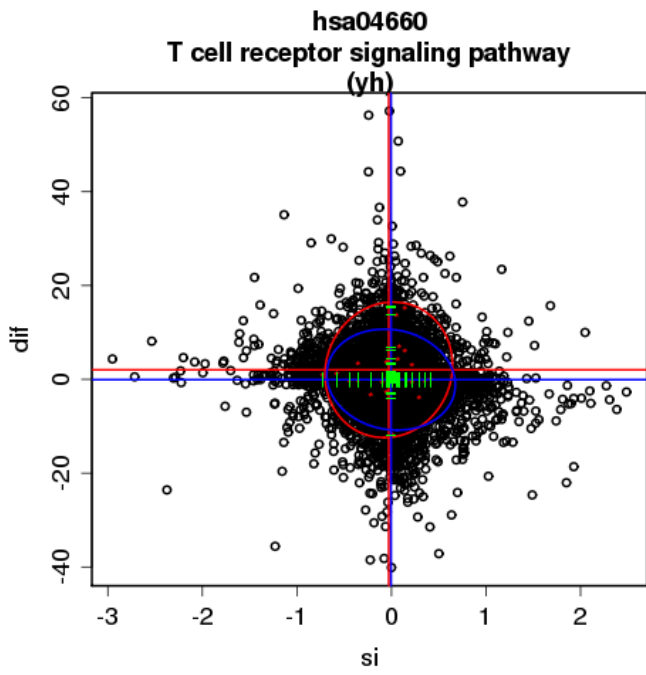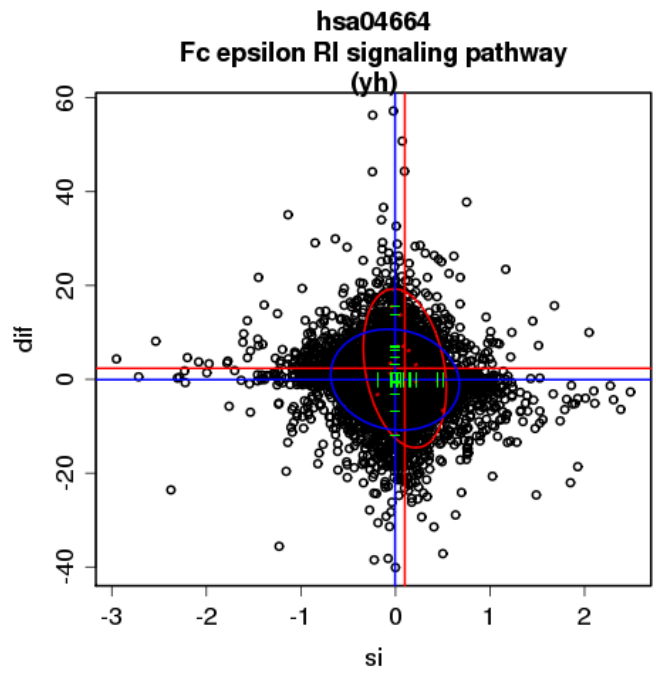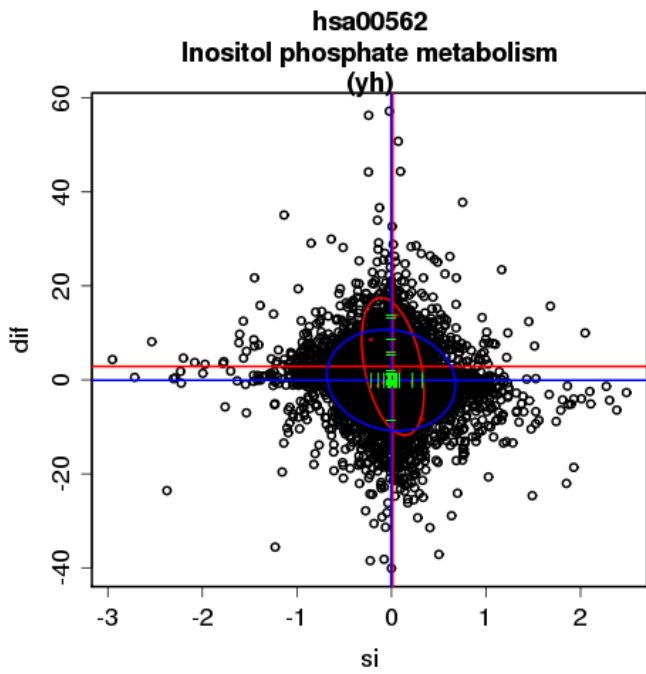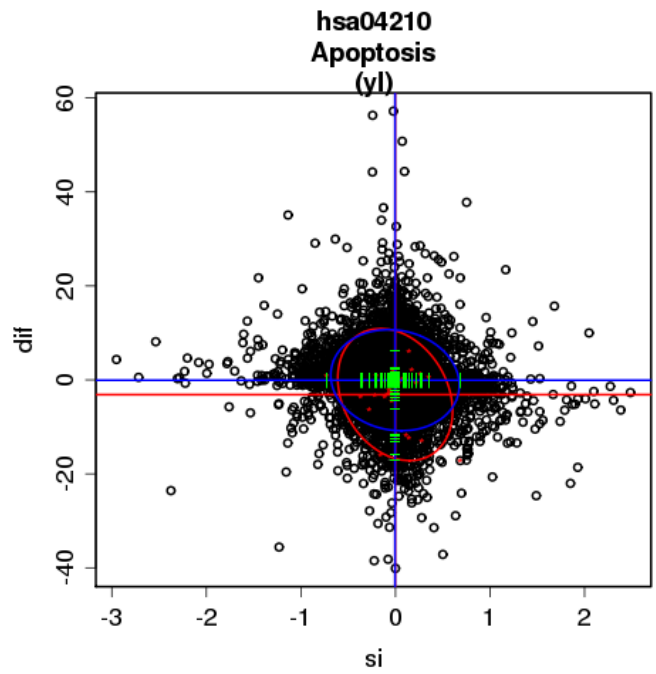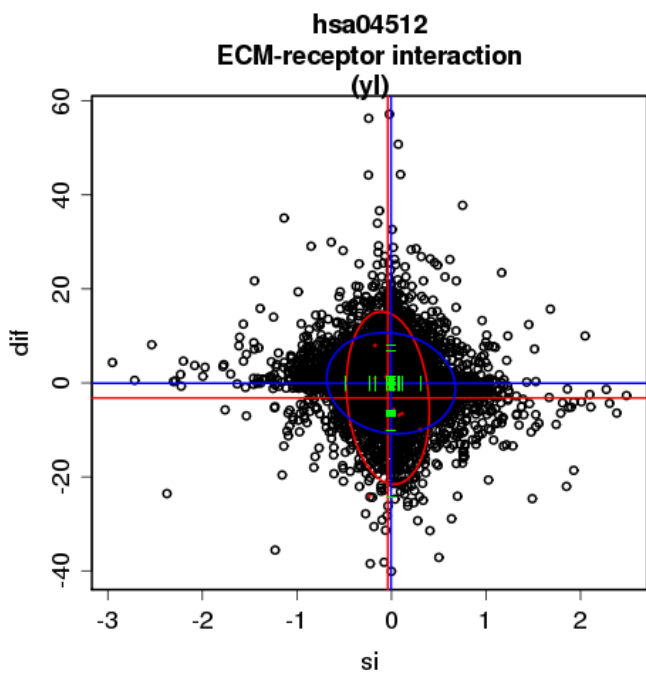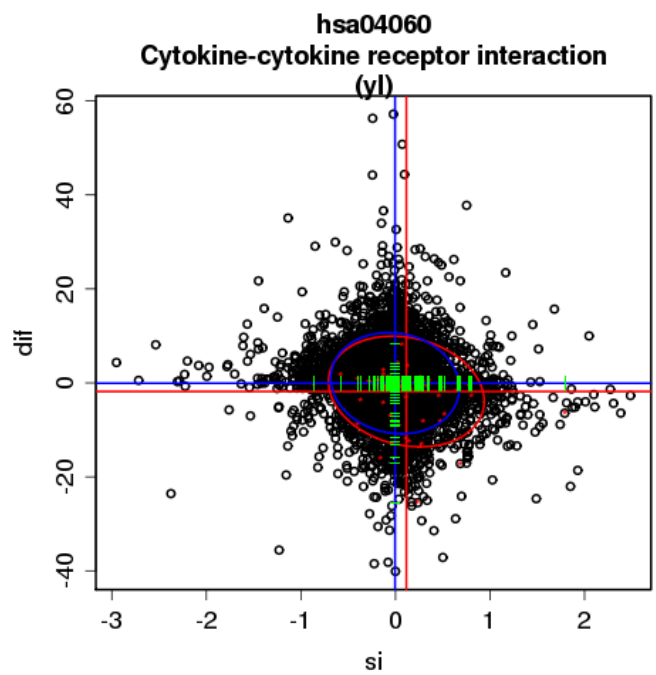

**hsa04360**  
**Axon guidance**  
(yl)

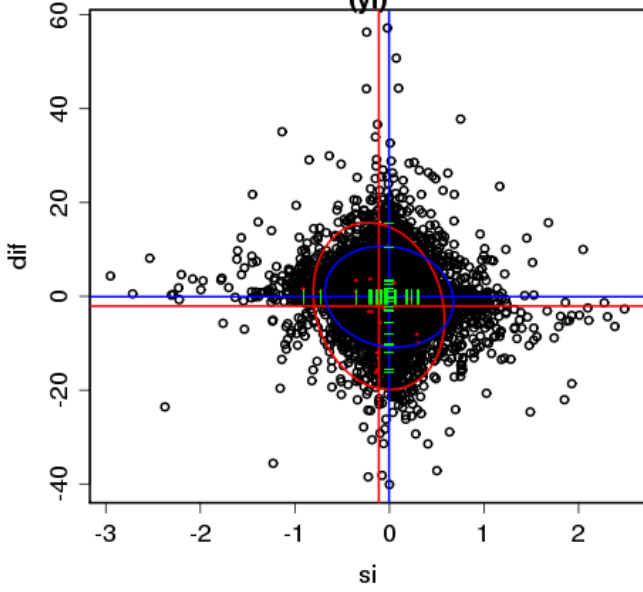

**hsa01040**  
**Biosynthesis of unsaturated fatty acids**  
(yl)

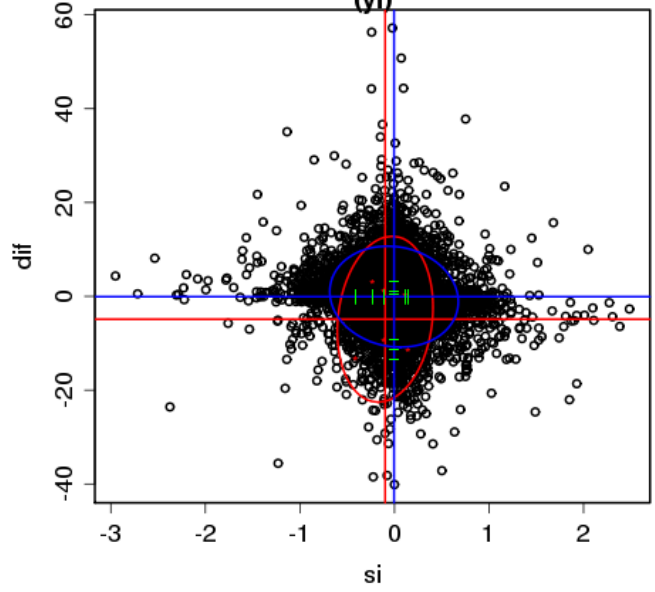

**hsa00220**  
**Urea cycle and metabolism of amino groups**  
(yl)

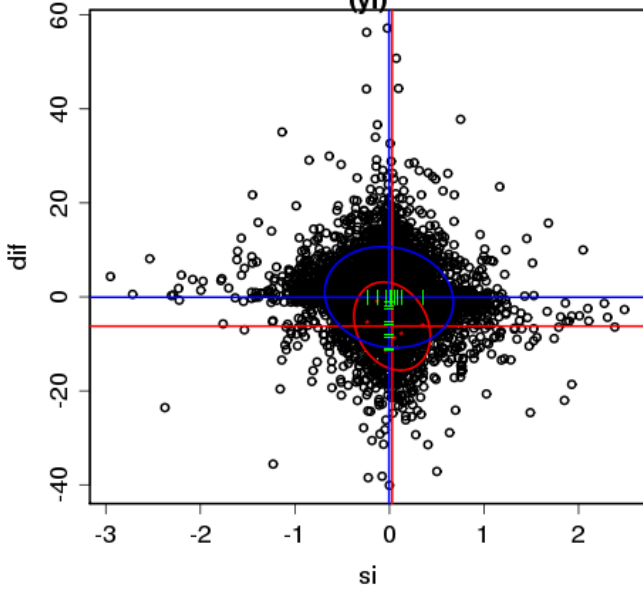

**hsa04940**  
**Type I diabetes mellitus**  
(yl)

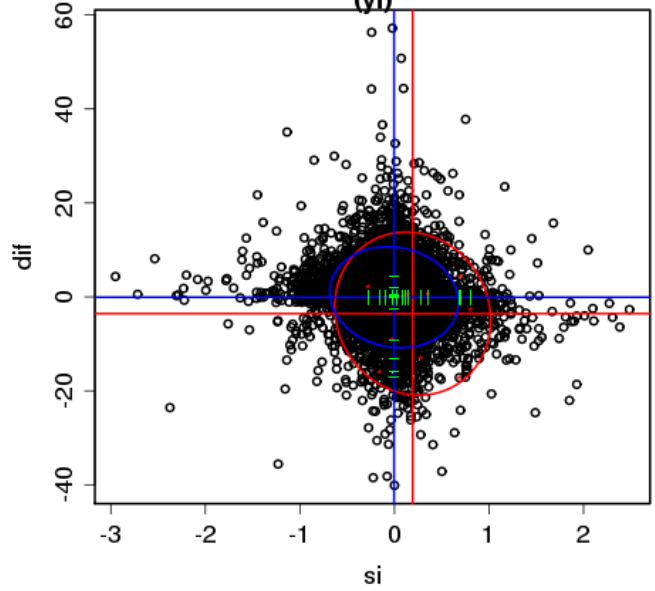

**hsa00010**  
**Glycolysis / Gluconeogenesis**  
(yl)

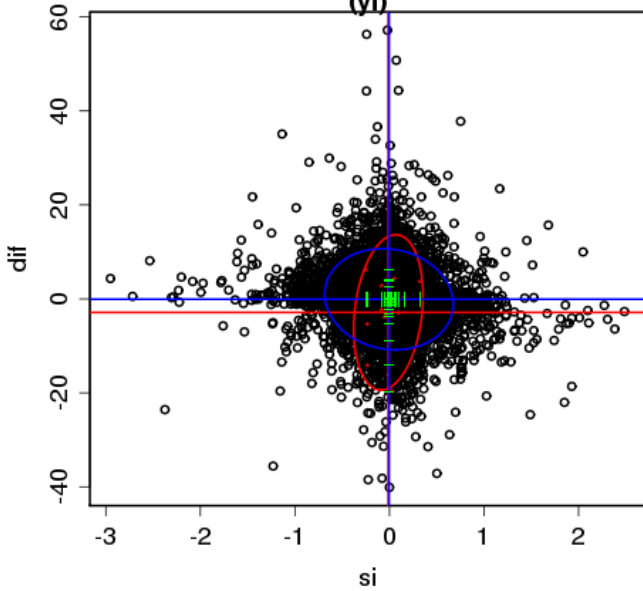

**hsa00620**  
**Pyruvate metabolism**  
(yl)

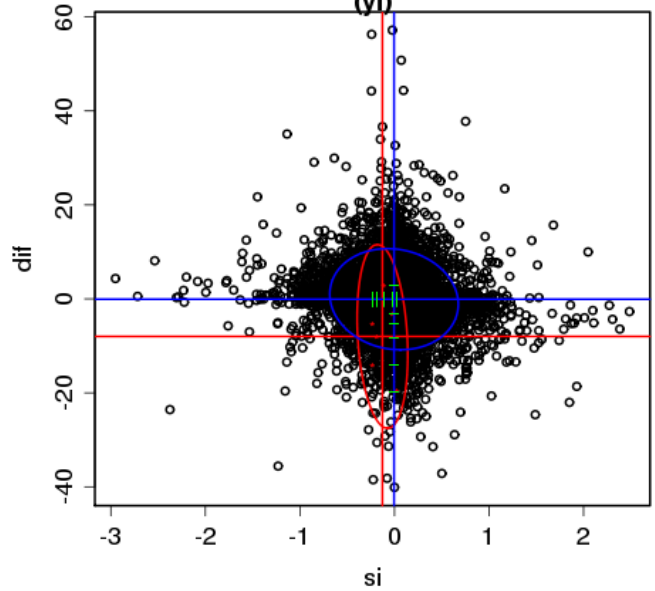

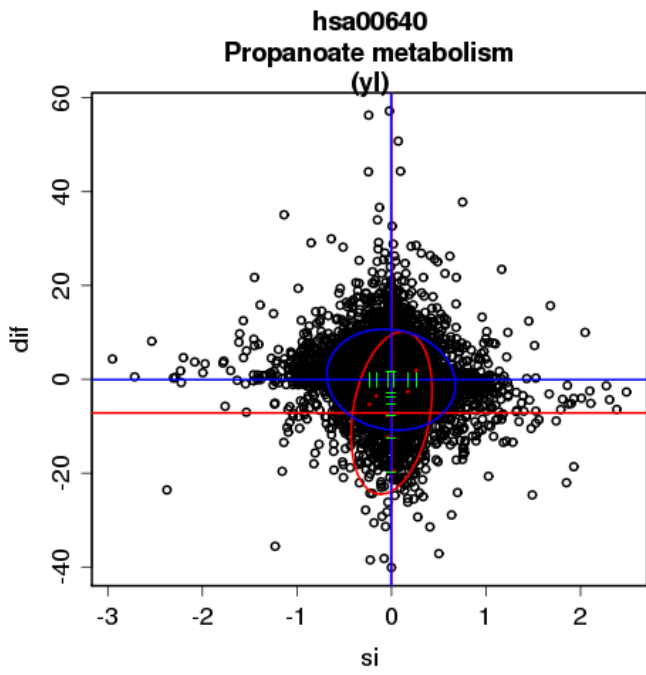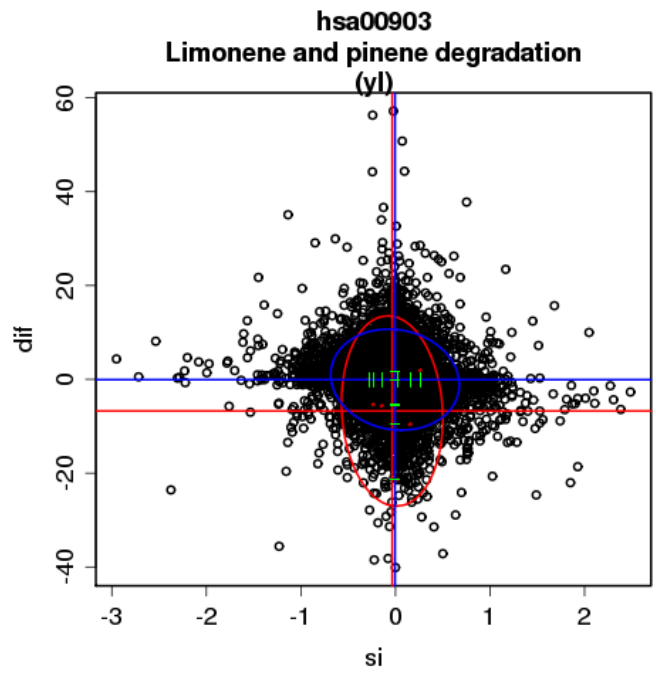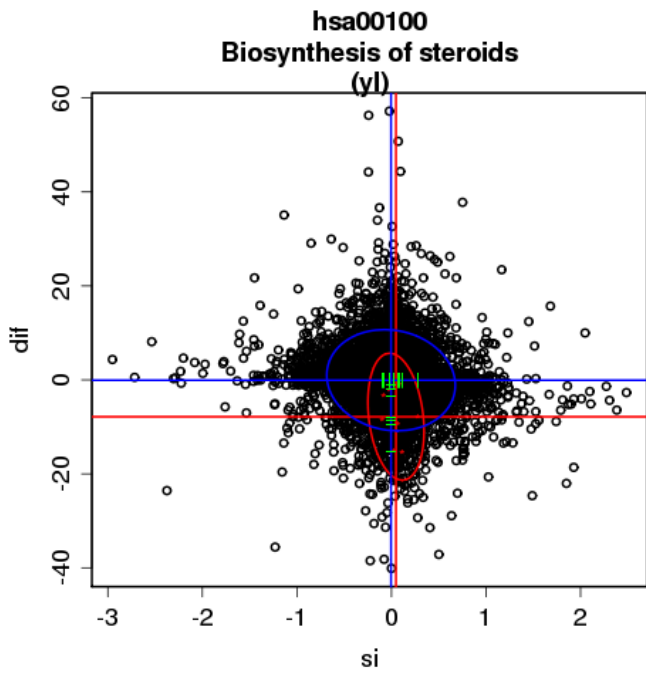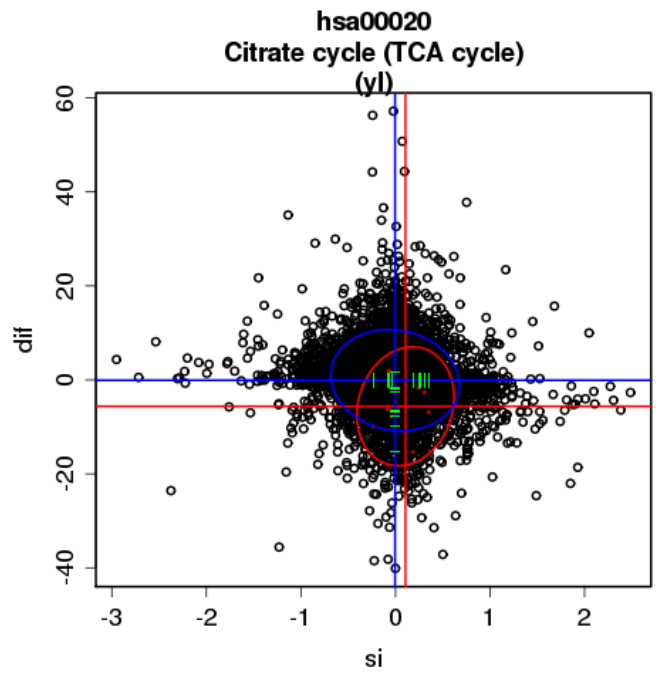

Supplement: pone.0010348.s008.pdf [file pone.0010348.s008.pdf]
