# Supplementary material for: Multidimensional Gene Set Analysis of Genomic Data
Source: PubMed Central journal article supplement (PMC2860497; doi:10.1371/journal.pone.0010348), 2010-04-27

# Combined functional profiling of SNP association and copy number in luminal B tumours using GO Biological Process

8 significant modules

LOR indicates Log Odds Ratio of the coefficient or the interaction

p indicates FDR adjusted p-value

|            | LOR<br>cgems | LOR<br>lumi-<br>nalB | cn | LOR In-<br>ter | p<br>cgems | p<br>cn lu-<br>minalB | p<br>Inter | pattern | name                                           |
|------------|--------------|----------------------|----|----------------|------------|-----------------------|------------|---------|------------------------------------------------|
| GO:0015807 | -0.09        | -0.85                |    | -0.59          | 0.98       | 0.46                  | 0.04       | b24     | L-amino acid transport                         |
| GO:0032228 | -0.63        | -1.21                |    | -0.68          | 0.65       | 0.24                  | 0.01       | b24     | regulation of synaptic transmission, GABAergic |
| GO:0050805 | -0.94        | -1.24                |    | -0.63          | 0.22       | 0.24                  | 0.04       | b24     | negative regulation of synaptic transmission   |
| GO:0051932 | -0.82        | -1.35                |    | -0.67          | 0.49       | 0.17                  | 0.02       | b24     | synaptic transmission, GABAergic               |
| GO:0042398 | -0.77        | -0.02                |    | 0.12           | 0.04       | 0.99                  | 1.00       | xl      | amino acid derivative biosynthetic process     |
| GO:0042401 | -0.93        | 0.12                 |    | 0.20           | 0.01       | 0.98                  | 1.00       | xl      | biogenic amine biosynthetic process            |
| GO:0030216 | 0.20         | 0.41                 |    | -0.03          | 0.80       | 0.03                  | 1.00       | yh      | keratinocyte differentiation                   |
| GO:0031424 | 0.29         | 0.59                 |    | -0.01          | 0.81       | 0.00                  | 1.00       | yh      | keratinization                                 |

Table 1: LOR: log odds ratio; p: adjusted p-value FDR

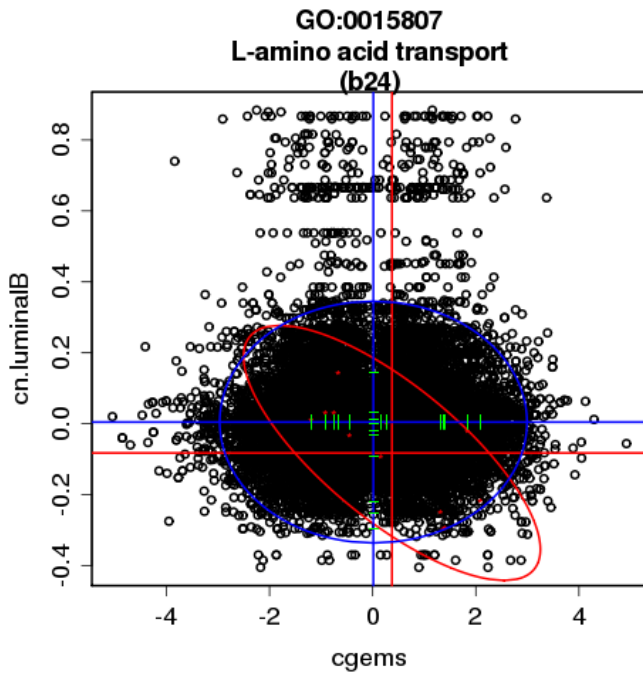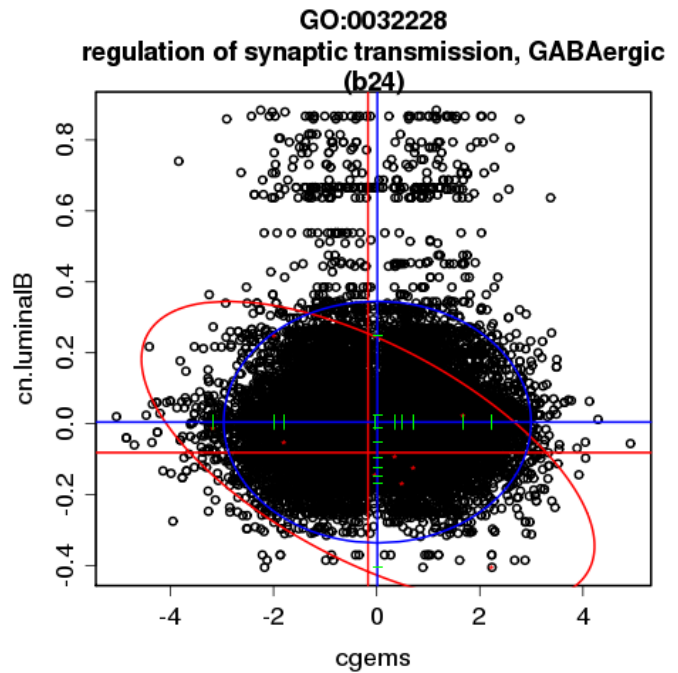

**GO:0050805**  
**negative regulation of synaptic transmission**  
**(b24)**

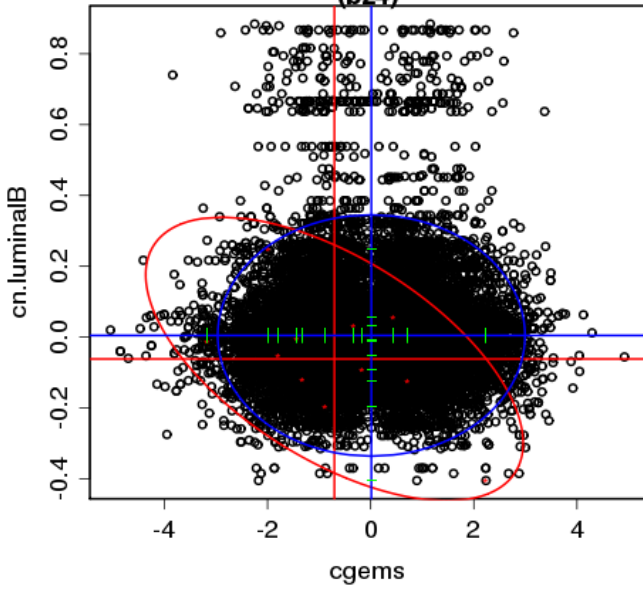

**GO:0051932**  
**synaptic transmission, GABAergic**  
**(b24)**

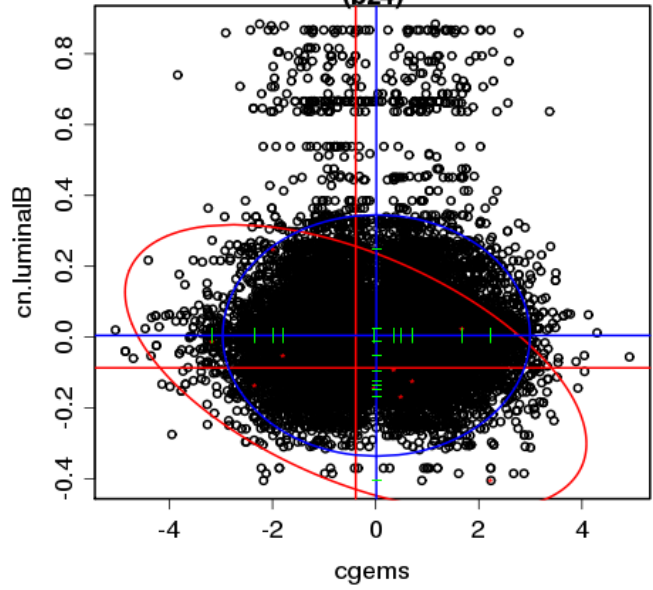

**GO:0042398**  
**amino acid derivative biosynthetic process**  
**(xl)**

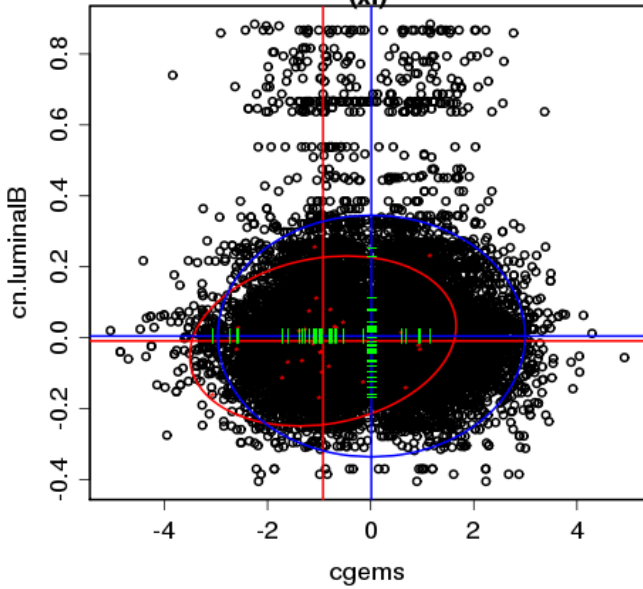

**GO:0042401**  
**biogenic amine biosynthetic process**  
**(xl)**

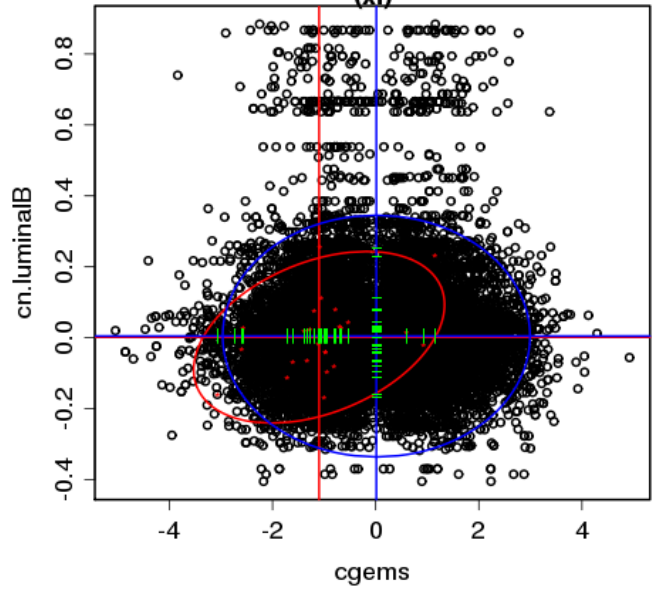

**GO:0030216**  
**keratinocyte differentiation**  
**(yh)**

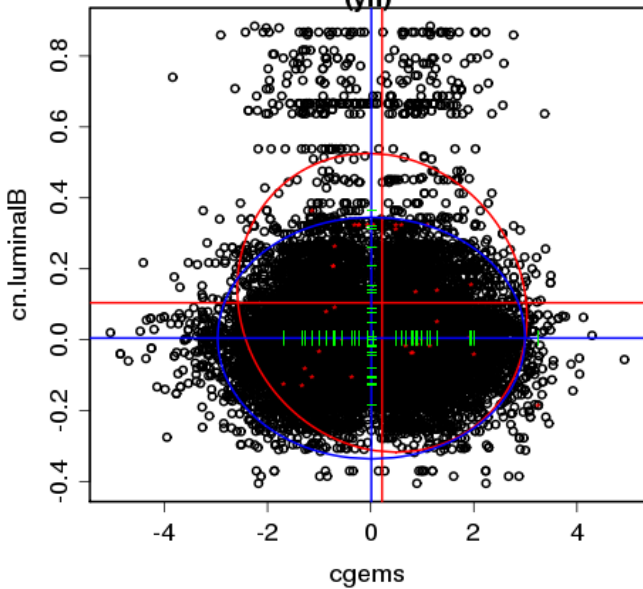

**GO:0031424**  
**keratinization**  
**(yh)**

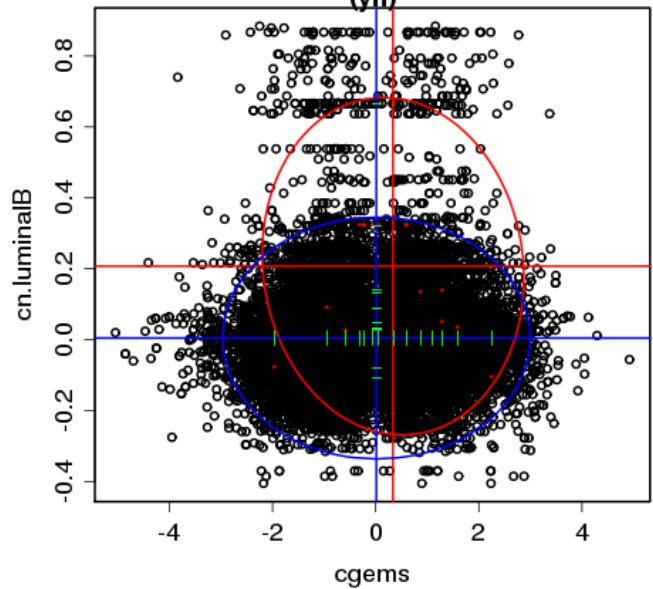

# Combined functional profiling of SNP association and copy number in luminal B tumours using KEGG pathways

1 significant modules

**LOR** indicates Log Odds Ratio of the coefficient or the interaction

**p** indicates FDR adjusted p-value

|          | LOR<br>cgems | LOR<br>cn<br>lumi-<br>nalB | LOR In-<br>ter | p<br>cgems | p<br>cn lu-<br>minalB | p<br>Inter | pattern | name                 |
|----------|--------------|----------------------------|----------------|------------|-----------------------|------------|---------|----------------------|
| hsa05217 | -0.28        | -0.11                      | 0.56           | 0.59       | 0.89                  | 0.01       | b13     | Basal cell carcinoma |

Table 1: LOR: log odds ratio; p: adjusted p-value FDR

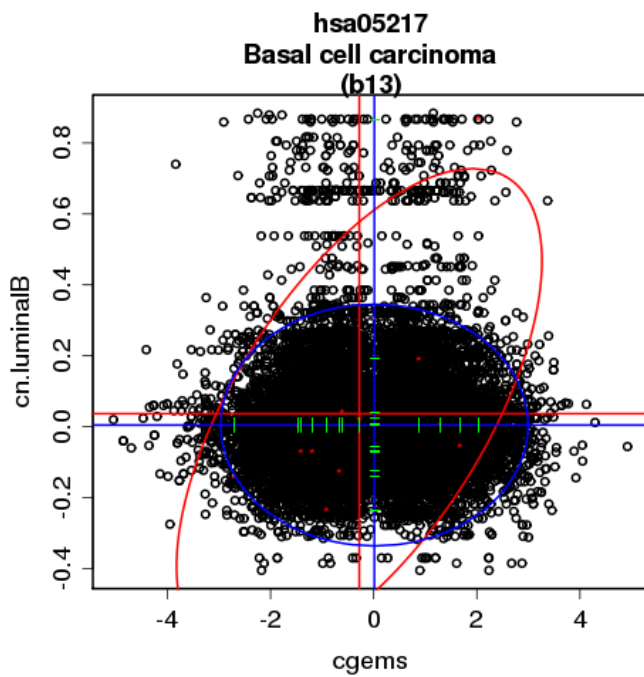

Supplement: pone.0010348.s010.pdf [file pone.0010348.s010.pdf]
