# Supplementary material for: Multidimensional Gene Set Analysis of Genomic Data
Source: PubMed Central journal article supplement (PMC2860497; doi:10.1371/journal.pone.0010348), 2010-04-27

# Combined functional profiling of differential gene expression and prognosis using GO Biological Process

29 significant modules

LOR indicates Log Odds Ratio of the coefficient or the interaction

p indicates FDR adjusted p-value

|            | LOR normal vs tumor | LOR prognosis | LOR Inter | p normal vs tumor | p prognosis | p Inter | pattern | name                                                 |
|------------|---------------------|---------------|-----------|-------------------|-------------|---------|---------|------------------------------------------------------|
| GO:0000087 | -0.45               | -0.08         | -0.42     | 0.01              | 0.81        | 0.00    | q2i     | M phase of mitotic cell cycle                        |
| GO:0000279 | -0.53               | -0.07         | -0.38     | 0.04              | 0.85        | 0.00    | q2i     | M phase                                              |
| GO:0000910 | -0.27               | -0.09         | -0.57     | 0.01              | 0.95        | 0.00    | q2i     | cytokinesis                                          |
| GO:0007067 | -0.47               | -0.07         | -0.40     | 0.04              | 0.90        | 0.00    | q2i     | mitosis                                              |
| GO:0022618 | -0.22               | -0.33         | -0.42     | 0.03              | 0.21        | 0.00    | q2i     | ribonucleoprotein complex assembly                   |
| GO:0051301 | -0.38               | -0.00         | -0.38     | 0.01              | 0.99        | 0.00    | q2i     | cell division                                        |
| GO:0051726 | -0.01               | 0.05          | -0.22     | 0.03              | 0.91        | 0.01    | q2i     | regulation of cell cycle                             |
| GO:0045638 | 0.09                | -0.35         | -0.60     | 0.01              | 0.65        | 0.04    | q4i     | negative regulation of myeloid cell differentiation  |
| GO:0000226 | -0.08               | 0.16          | -0.31     | 0.11              | 0.47        | 0.02    | b24     | microtubule cytoskeleton organization and biogenesis |
| GO:0000278 | -0.34               | 0.04          | -0.28     | 0.11              | 0.94        | 0.00    | b24     | mitotic cell cycle                                   |
| GO:0007346 | -0.30               | -0.08         | -0.39     | 0.07              | 0.90        | 0.00    | b24     | regulation of mitotic cell cycle                     |
| GO:0022403 | -0.42               | -0.00         | -0.31     | 0.09              | 0.99        | 0.00    | b24     | cell cycle phase                                     |
| GO:0042254 | -0.40               | -0.45         | -0.42     | 0.19              | 0.10        | 0.01    | b24     | ribosome biogenesis                                  |
| GO:0006412 | 0.06                | -0.28         | -0.20     | 0.02              | 0.01        | 0.07    | q4f     | translation                                          |
| GO:0006414 | 0.45                | -1.12         | -0.43     | 0.00              | 0.00        | 0.28    | q4f     | translational elongation                             |
| GO:0042312 | 0.45                | 0.08          | -0.51     | 0.03              | 0.97        | 0.22    | xh      | regulation of vasodilation                           |
| GO:0000209 | -0.25               | 0.55          | 0.13      | 0.94              | 0.01        | 1.00    | yh      | protein polyubiquitination                           |
| GO:0006066 | 0.08                | 0.20          | -0.02     | 0.97              | 0.02        | 1.00    | yh      | alcohol metabolic process                            |
| GO:0010033 | 0.05                | 0.29          | 0.00      | 0.99              | 0.02        | 1.00    | yh      | response to organic substance                        |
| GO:0032944 | -0.17               | -0.70         | 0.06      | 0.97              | 0.02        | 1.00    | yl      | regulation of mononuclear cell proliferation         |
| GO:0042098 | -0.18               | -0.61         | 0.08      | 0.95              | 0.04        | 1.00    | yl      | T cell proliferation                                 |
| GO:0042110 | 0.03                | -0.38         | 0.14      | 0.75              | 0.03        | 0.86    | yl      | T cell activation                                    |
| GO:0042129 | -0.33               | -0.74         | -0.02     | 0.99              | 0.05        | 1.00    | yl      | regulation of T cell proliferation                   |
| GO:0045321 | -0.04               | -0.28         | 0.06      | 0.92              | 0.03        | 1.00    | yl      | leukocyte activation                                 |
| GO:0046649 | -0.06               | -0.33         | 0.07      | 0.89              | 0.02        | 1.00    | yl      | lymphocyte activation                                |
| GO:0046651 | -0.19               | -0.49         | -0.05     | 0.99              | 0.05        | 1.00    | yl      | lymphocyte proliferation                             |
| GO:0050670 | -0.17               | -0.70         | 0.06      | 0.97              | 0.02        | 1.00    | yl      | regulation of lymphocyte proliferation               |
| GO:0051249 | -0.06               | -0.44         | 0.24      | 0.52              | 0.04        | 0.71    | yl      | regulation of lymphocyte activation                  |
| GO:0022613 | -0.32               | -0.35         | -0.39     | 0.01              | 0.03        | 0.00    | no_rel  | ribonucleoprotein complex biogenesis and assembly    |

Table 1: LOR: log odds ratio; p: adjusted p-value FDR

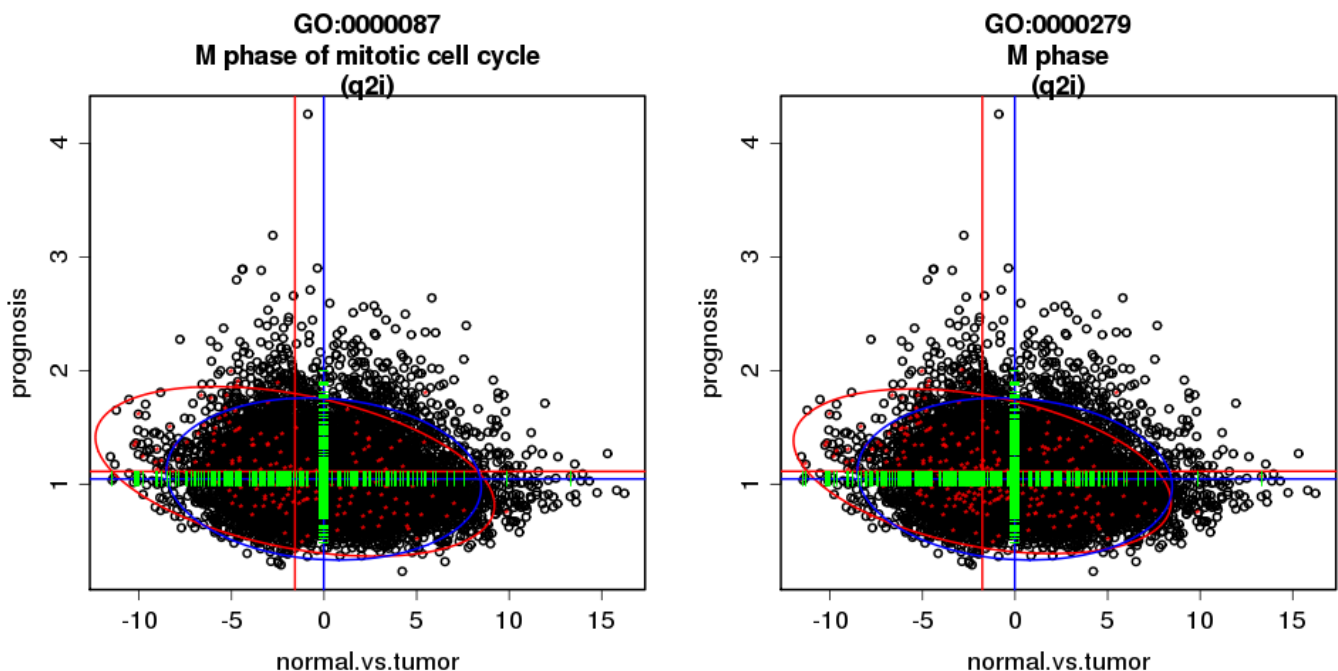

**GO:000910**  
**cytokinesis**  
**(q2i)**

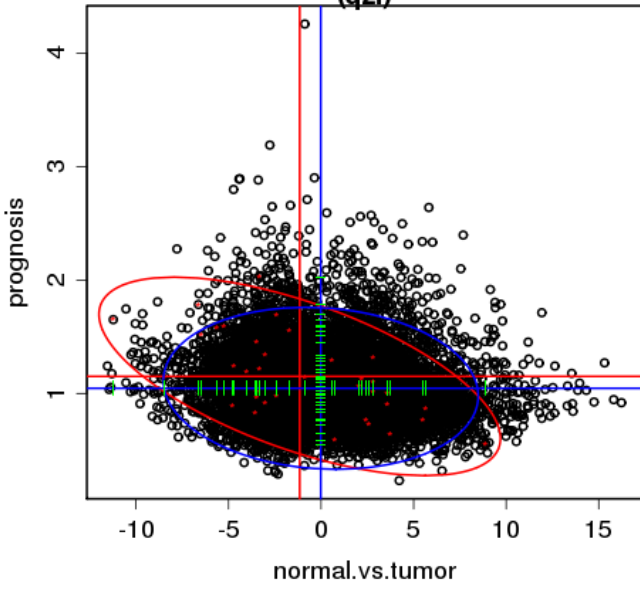

**GO:0007067**  
**mitosis**  
**(q2i)**

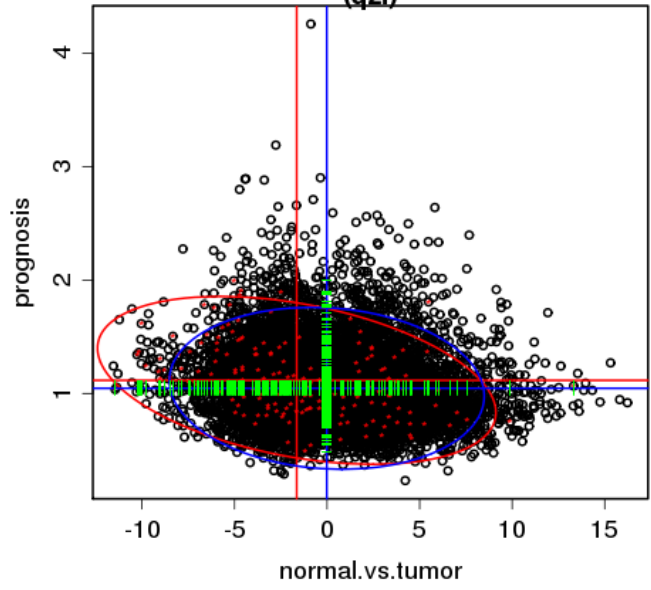

**GO:0022618**  
**ribonucleoprotein complex assembly**  
**(q2i)**

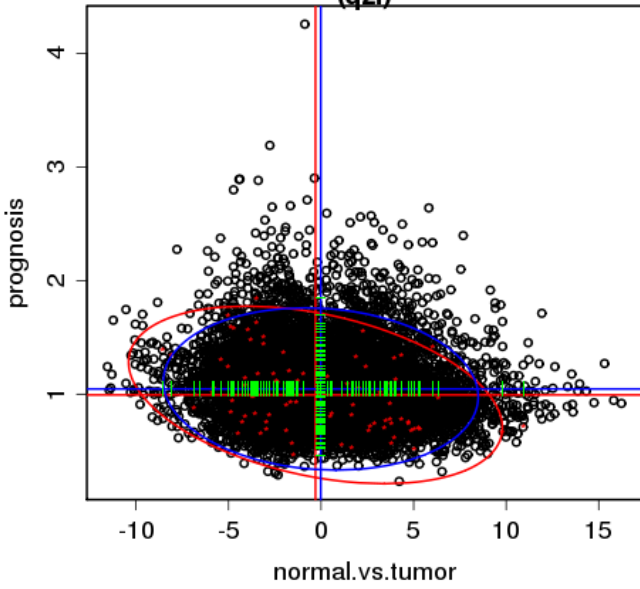

**GO:0051301**  
**cell division**  
**(q2i)**

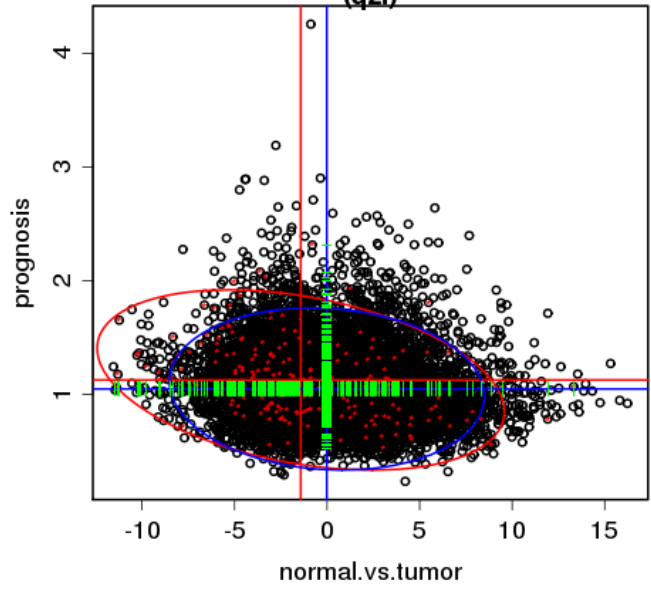

**GO:0051726**  
**regulation of cell cycle**  
**(q2i)**

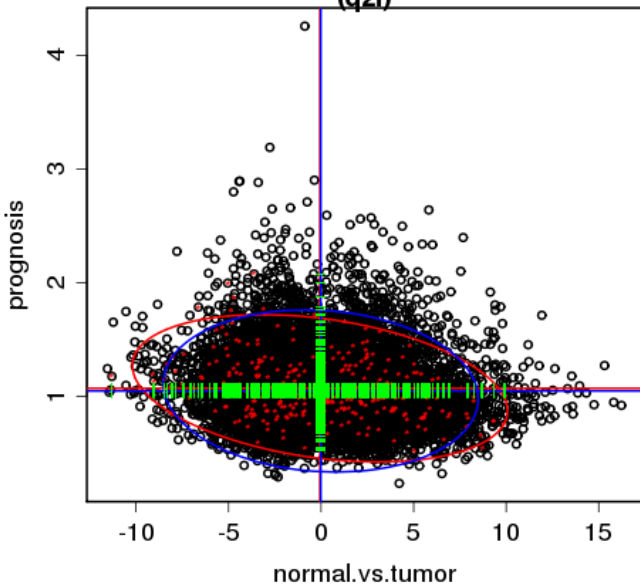

**GO:0045638**  
**negative regulation of myeloid cell differentiation**  
**(q4i)**

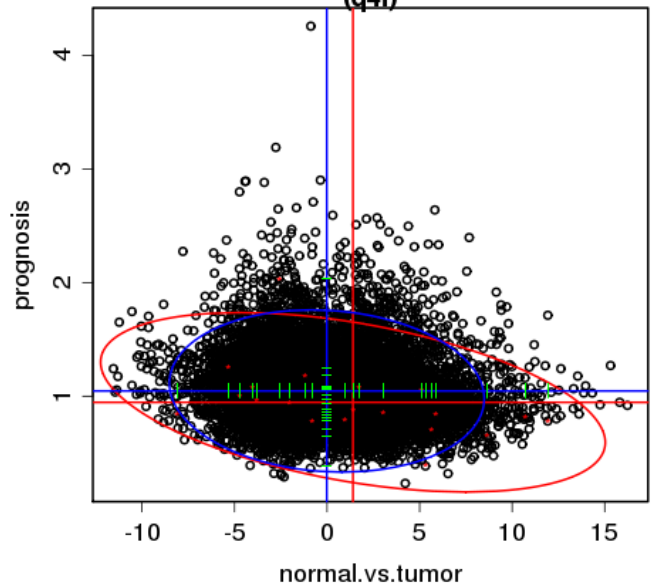

**GO:000226**  
**microtubule cytoskeleton organization and biogenesis:**  
**(b24)**

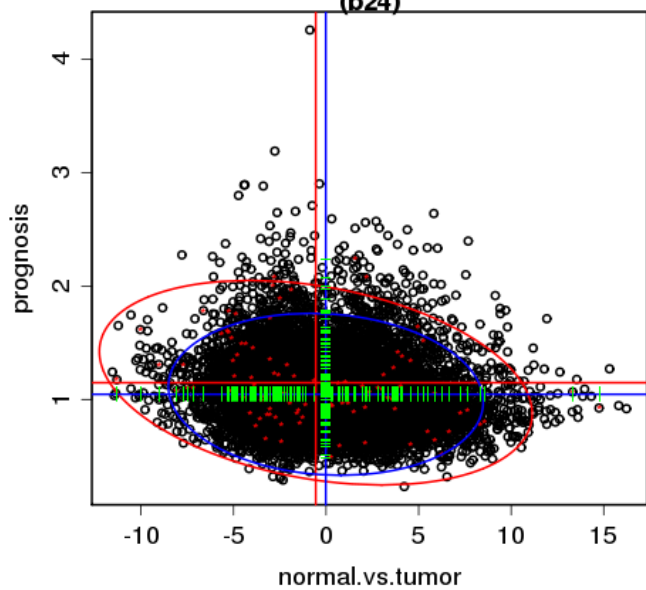

**GO:000278**  
**mitotic cell cycle**  
**(b24)**

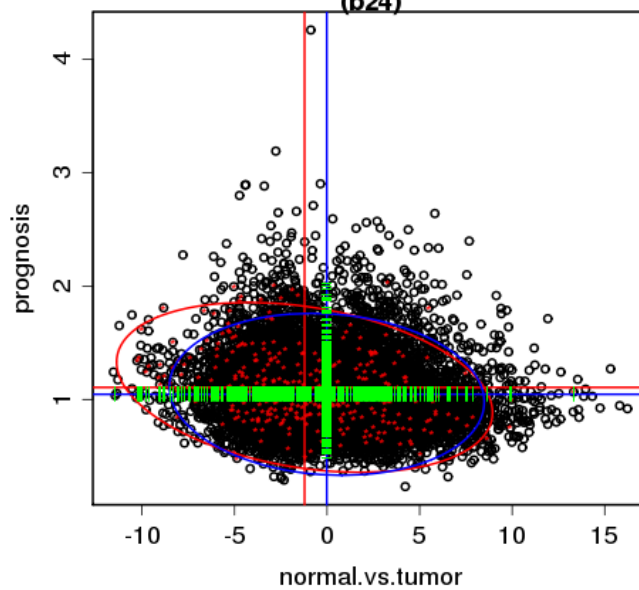

**GO:0007346**  
**regulation of mitotic cell cycle**  
**(b24)**

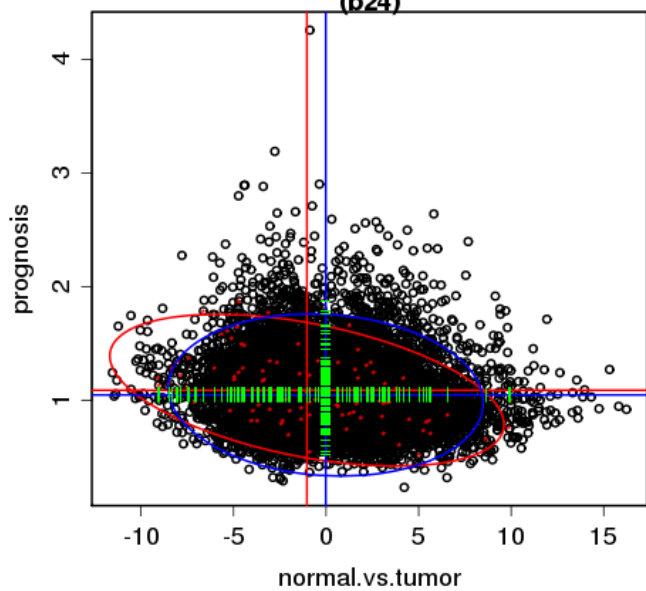

**GO:0022403**  
**cell cycle phase**  
**(b24)**

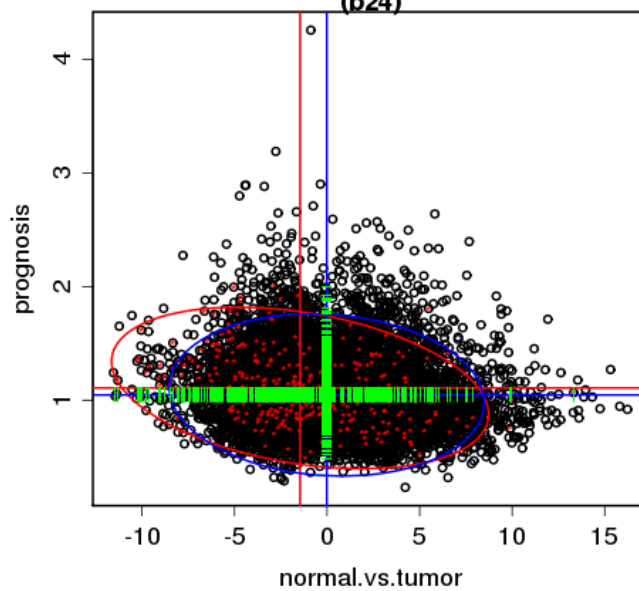

**GO:0042254**  
**ribosome biogenesis**  
**(b24)**

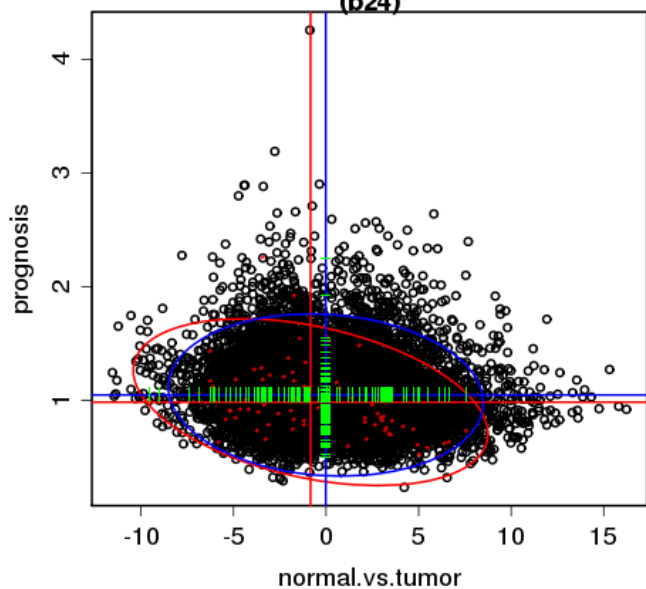

**GO:0006412**  
**translation**  
**(q4f)**

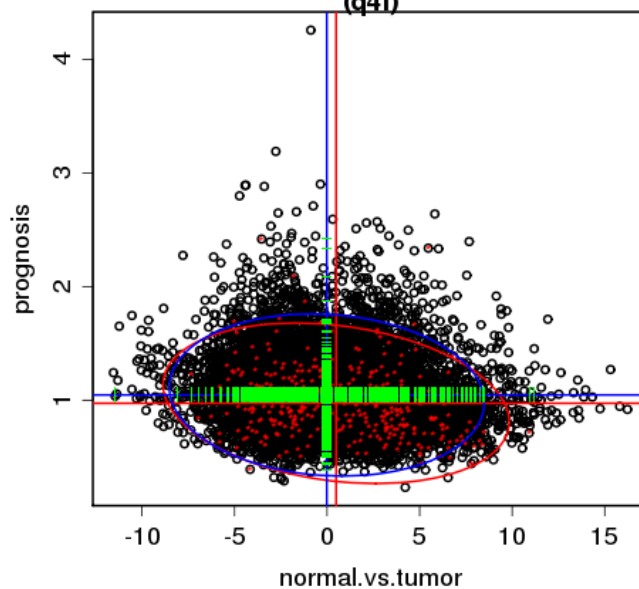

**GO:0006414**  
**translational elongation**  
**(q4f)**

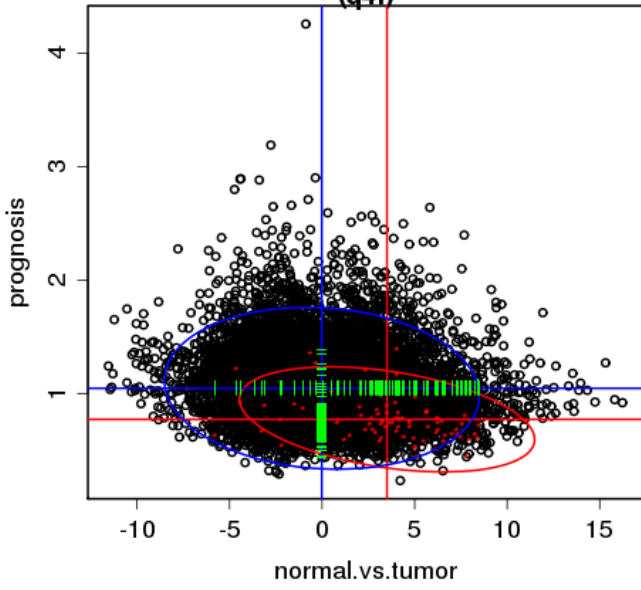

**GO:0042312**  
**regulation of vasodilation**  
**(xh)**

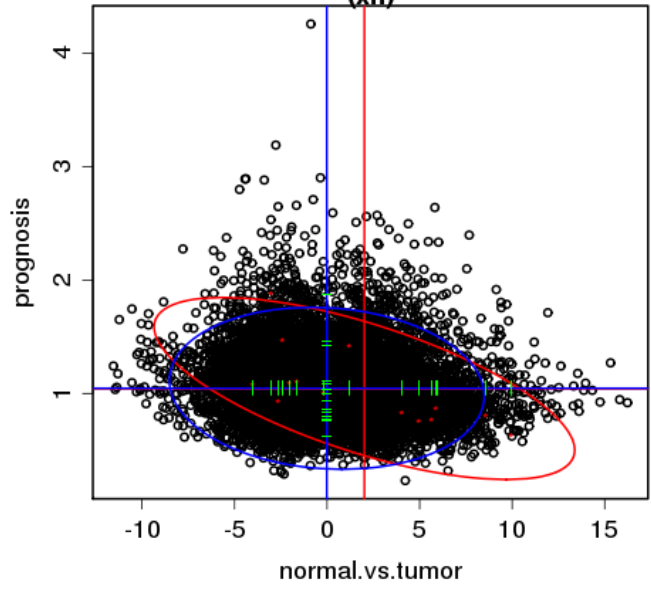

**GO:0000209**  
**protein polyubiquitination**  
**(yh)**

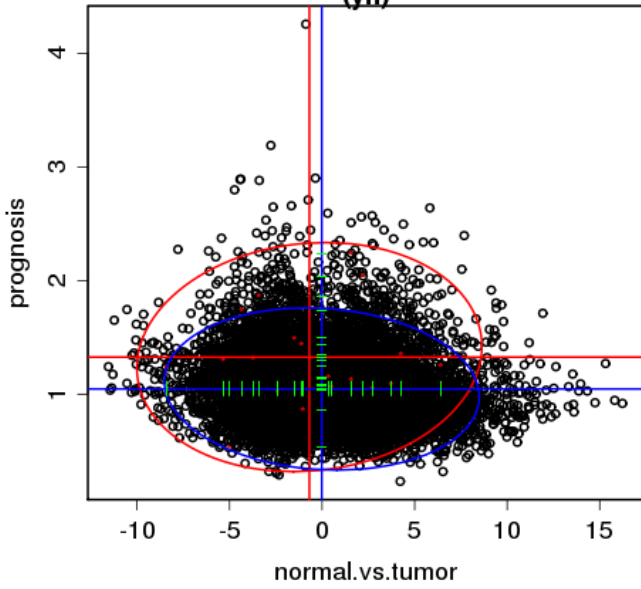

**GO:0006066**  
**alcohol metabolic process**  
**(yh)**

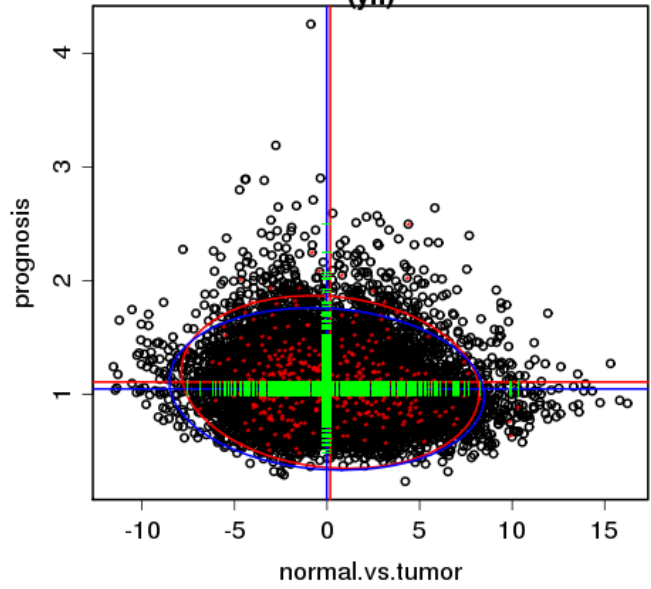

**GO:0010033**  
**response to organic substance**  
**(yh)**

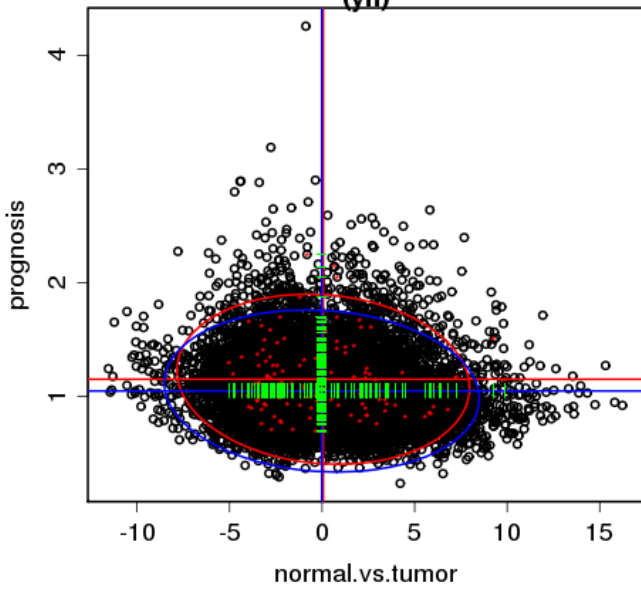

**GO:0032944**  
**regulation of mononuclear cell proliferation**  
**(yl)**

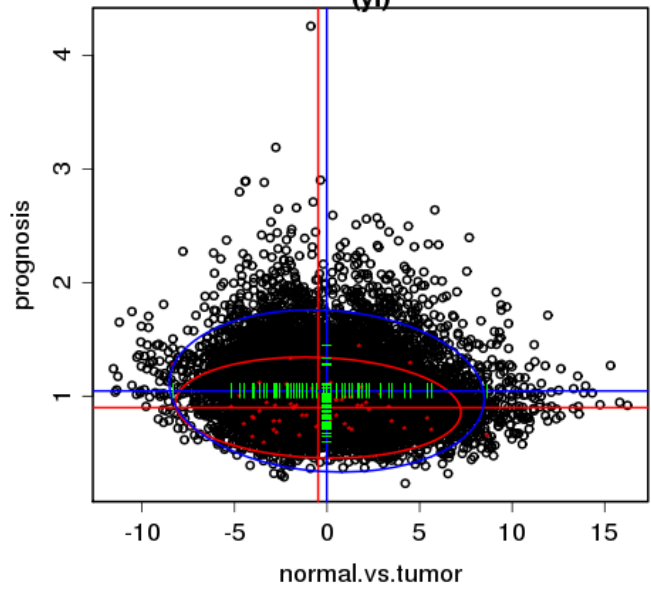

**GO:0042098**  
**T cell proliferation**  
(yl)

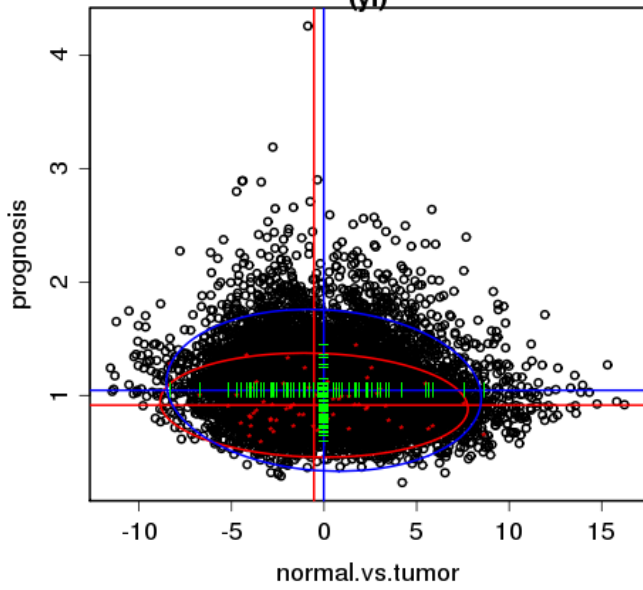

**GO:0042110**  
**T cell activation**  
(yl)

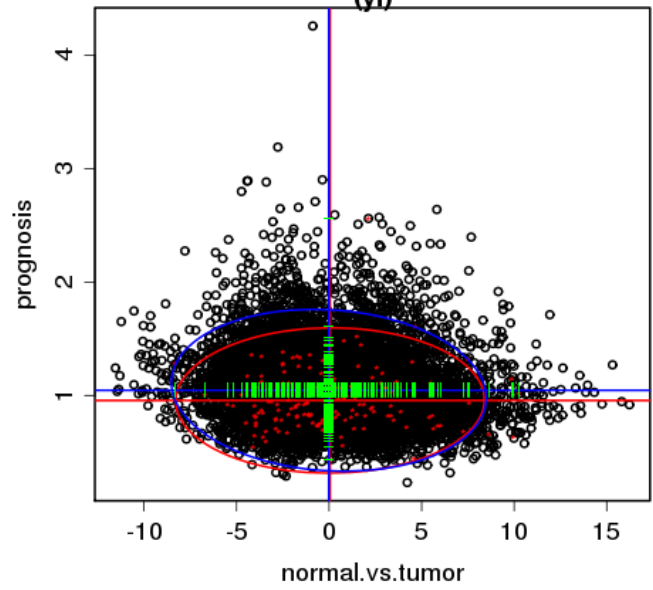

**GO:0042129**  
**regulation of T cell proliferation**  
(yl)

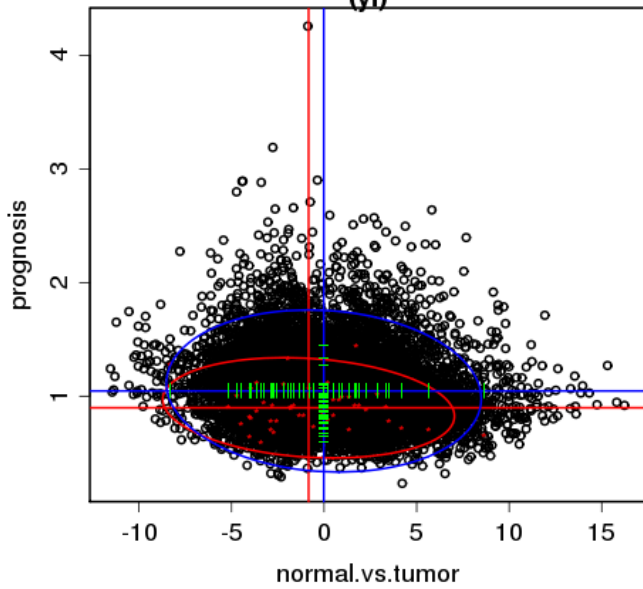

**GO:0045321**  
**leukocyte activation**  
(yl)

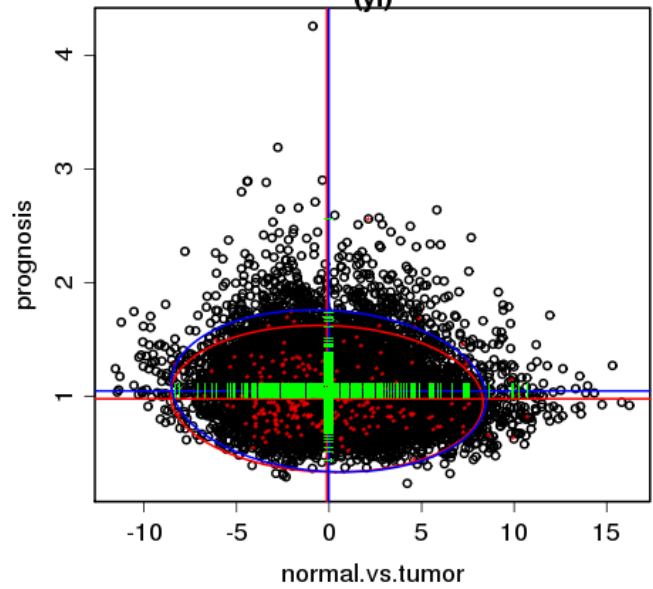

**GO:0046649**  
**lymphocyte activation**  
(yl)

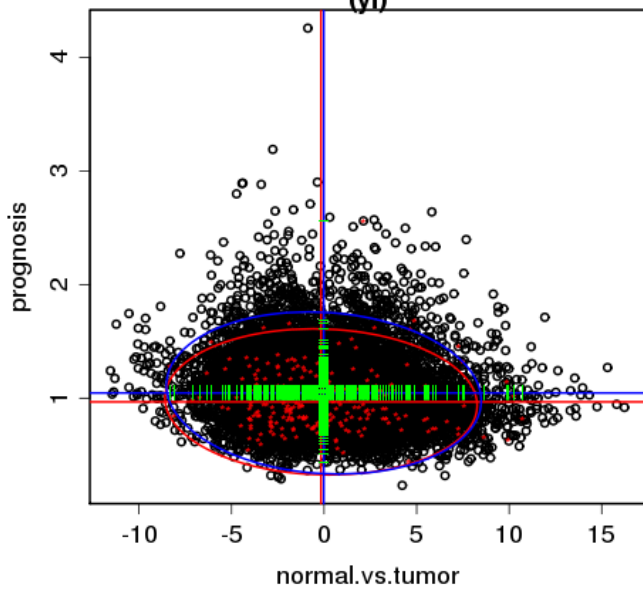

**GO:0046651**  
**lymphocyte proliferation**  
(yl)

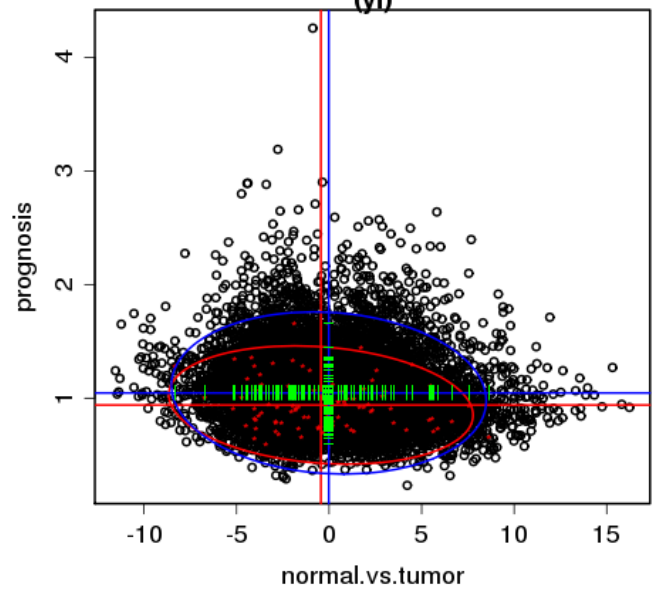

**GO:0050670**  
**regulation of lymphocyte proliferation**  
(yl)

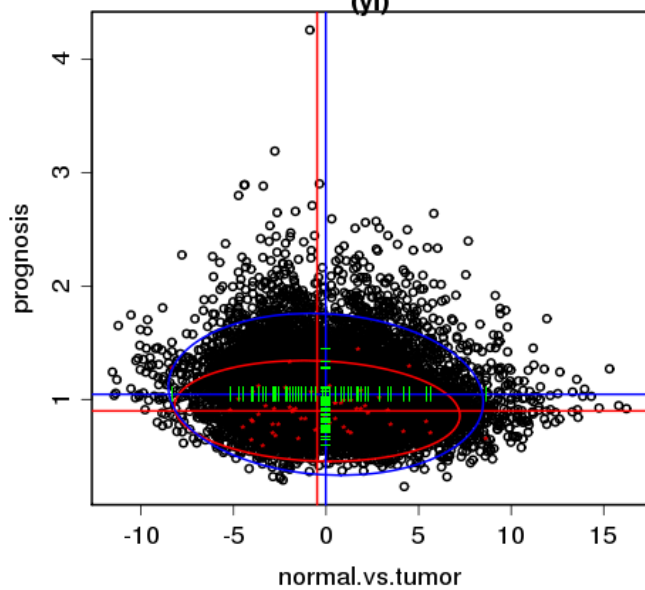

**GO:0051249**  
**regulation of lymphocyte activation**  
(yl)

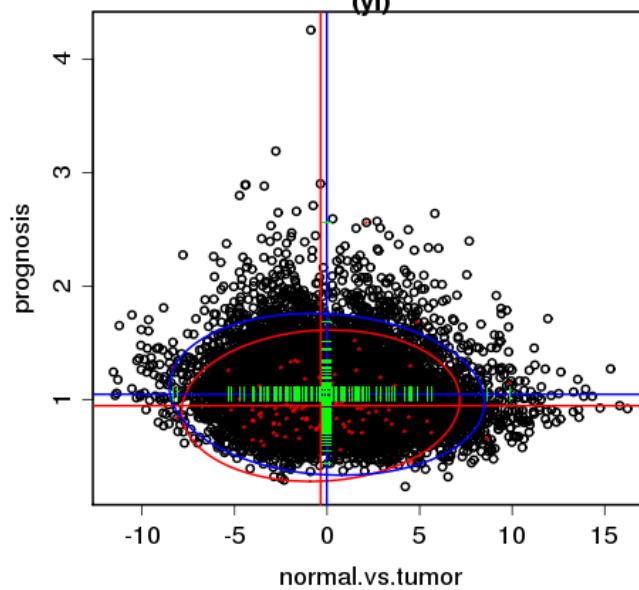

**GO:0022613**  
**ribonucleoprotein complex biogenesis and assembly**  
(no\_rel)

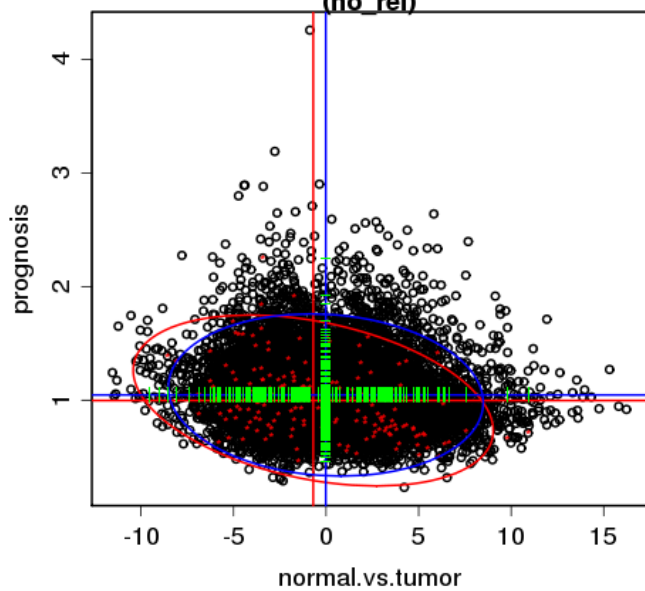



# Combined functional profiling of differential gene expression and prognosis using KEGG pathways

6 significant modules

LOR indicates Log Odds Ratio of the coefficient or the interaction

p indicates FDR adjusted p-value

|          | LOR normal vs tumor | LOR prognosis | LOR Inter | p normal vs tumor | p prognosis | p Inter | pattern | name                              |
|----------|---------------------|---------------|-----------|-------------------|-------------|---------|---------|-----------------------------------|
| hsa04660 | -0.26               | -0.18         | 0.53      | 0.03              | 0.81        | 0.04    | q3i     | T cell receptor signaling pathway |
| hsa04662 | -0.36               | -0.05         | 0.58      | 0.03              | 0.90        | 0.04    | q3i     | B cell receptor signaling pathway |
| hsa04150 | 0.67                | 0.30          | -0.48     | 0.00              | 0.57        | 0.05    | q4i     | mTOR signaling pathway            |
| hsa04140 | -0.77               | -0.85         | -0.78     | 0.10              | 0.31        | 0.01    | b24     | Regulation of autophagy           |
| hsa04370 | -0.55               | 0.55          | 0.29      | 0.43              | 0.01        | 0.75    | yh      | VEGF signaling pathway            |
| hsa03010 | 0.11                | -1.65         | -0.49     | 0.43              | 0.04        | 0.75    | yl      | Ribosome                          |

Table 1: LOR: log odds ratio; p: adjusted p-value FDR

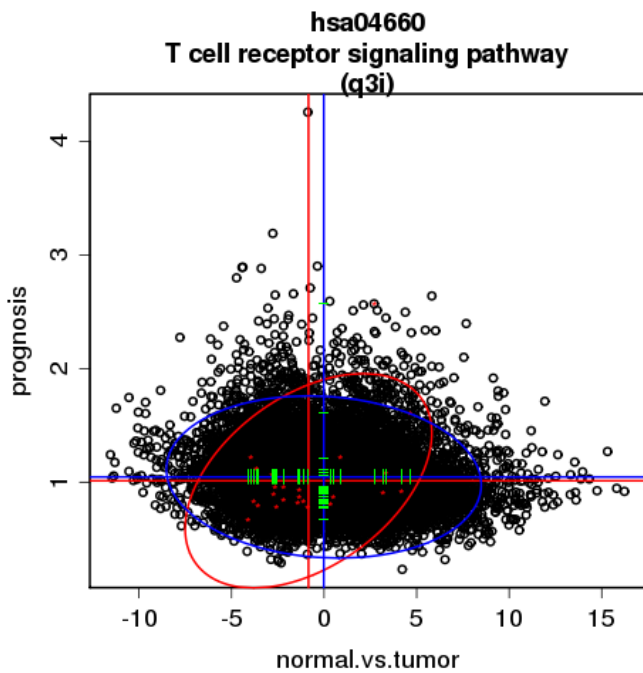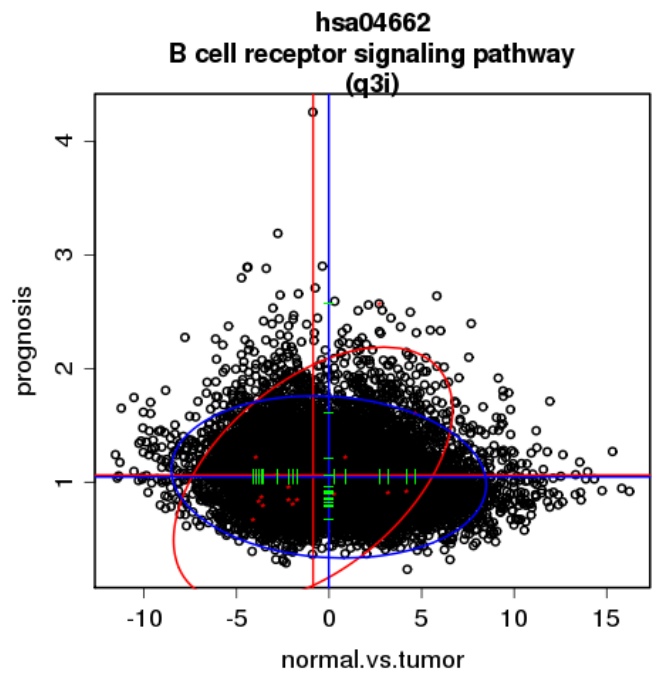

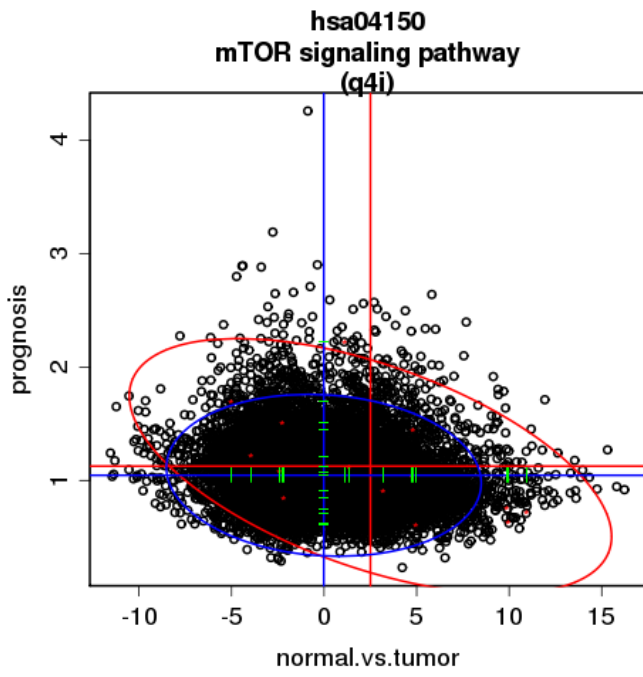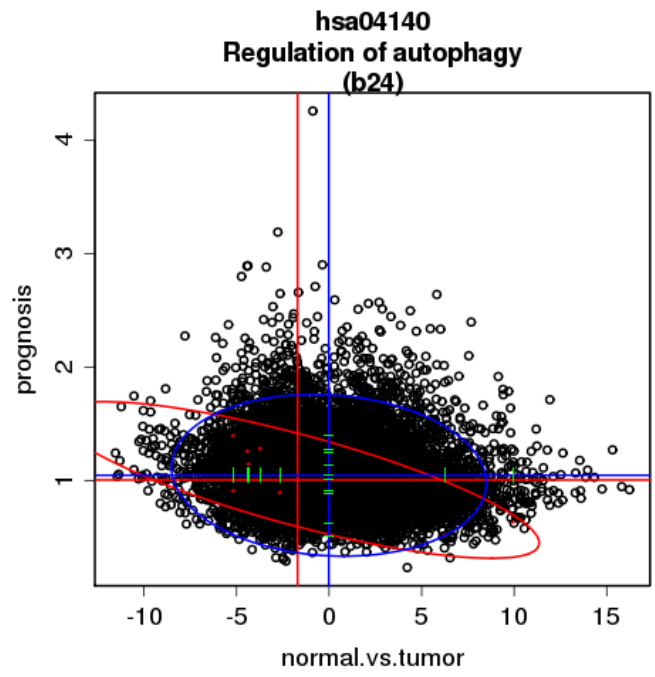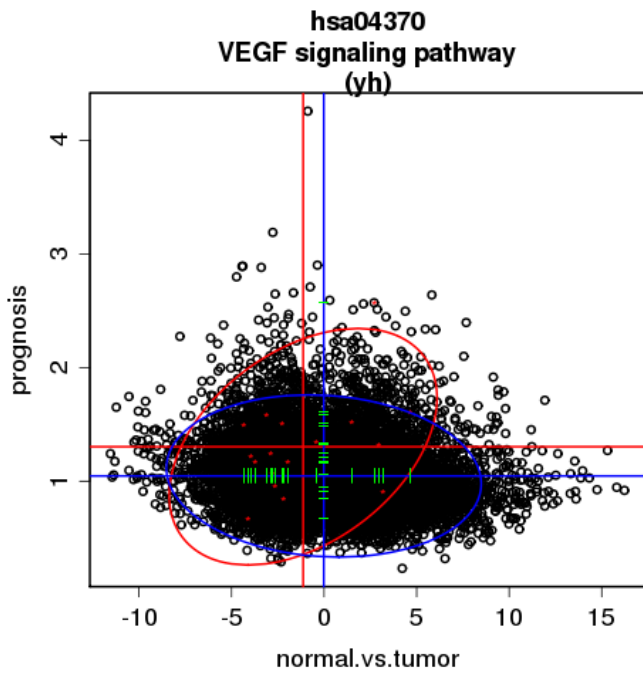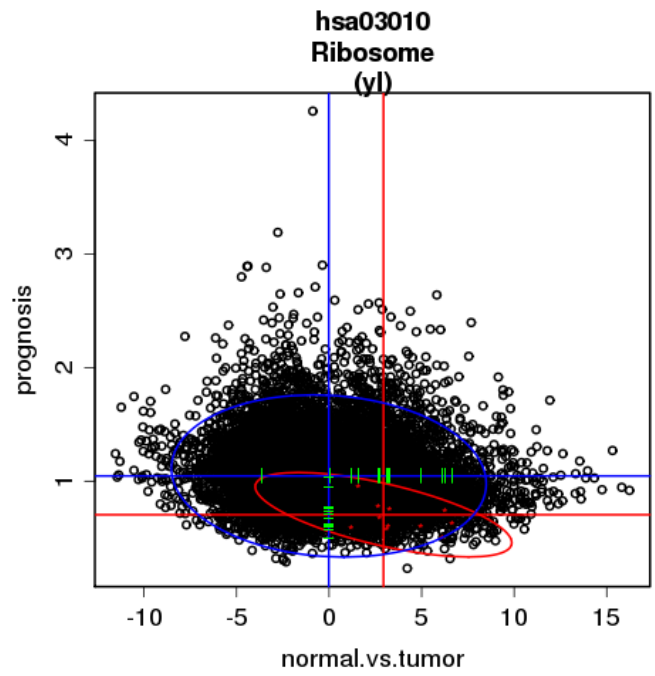

Supplement: pone.0010348.s011.pdf [file pone.0010348.s011.pdf]
