# Supplementary material for: Multidimensional Gene Set Analysis of Genomic Data
Source: PLoS One. 2010 Apr 27;5(4):e10348. doi: 10.1371/journal.pone.0010348 (PMC2860497; doi:10.1371/journal.pone.0010348)
Supplement: Table S1 — Excel file containing significant GO terms obtained upon the application of the logistic model to the mRNA stability (RS) and to the transcription rate (TR) variables independently. (0.19 MB XLS) [file pone.0010348.s006.xls]

## Sheet: main_effect_TR
Logistic model using 2 independent variables and interaction term
TR: Transcription Rate
RS: mRNA Stability
Inter: interaction term
known: is the term already known from the univariate analysis?
	Biological Processes significant in TR
		log.odds.ratio (model coefficients)			adj.p
GO.ID	blocksize	TR	RS	inter	TR	RS	inter	new	GO.name
GO:0019953	72	-11.875	-0.818125	3.28781	0.0413464	0.0102	0.0211906	yes	sexual reproduction
GO:0042221	219	-6.65472	-0.1209	2.04667	0.0171835	0.59895	0.00545555	yes	response to chemical stimulus
GO:0051704	82	-11.9837	-0.685314	3.23067	0.0382083	0.0204021	0.0240956	yes	multi-organism process
GO:0000819	41	-30.4851	-0.873791	7.0965	0.0216635	0.0326559	0.0211906	yes	sister chromatid segregation
GO:0000070	39	-30.2262	-0.778138	7.00773	0.0311513	0.0703928	0.0276588	yes	mitotic sister chromatid segregation
GO:0019725	111	-9.12771	-0.377209	2.70557	0.0171835	0.154998	0.00545555	yes	cellular homeostasis
GO:0042592	116	-8.75137	-0.299149	2.5886	0.0216635	0.265154	0.00575629	yes	homeostatic process
GO:0065004	64	12.1171	-0.488745	-4.60467	0.00345613	0.21226	0.0187953	no	protein-DNA complex assembly
GO:0006325	178	8.00572	-0.472262	-3.09403	0.00126532	0.0311794	0.00545555	no	establishment and/or maintenance of chromatin architecture
GO:0006260	80	-20.3534	-0.970072	4.99157	0.0047781	0.000639389	0.00592322	no	DNA replication
GO:0006261	56	-25.1491	-1.31375	6.27771	0.00345613	8.89279e-05	0.00545555	no	DNA-dependent DNA replication
GO:0006323	84	12.6316	-0.484278	-4.96125	0.00126532	0.145087	0.00575629	no	DNA packaging
GO:0006333	88	12.4442	-0.398392	-4.8392	0.00126532	0.228278	0.00545555	no	chromatin assembly or disassembly
GO:0031497	79	12.5132	-0.442726	-4.83919	0.00126532	0.20386	0.00575629	no	chromatin assembly

## Sheet: main_effect_RS
Logistic model using 2 independent variables and interaction term
TR: Transcription Rate
RS: mRNA Stability
Inter: interaction term
known: is the term already known from the univariate analysis?
	Biological Processes significant in RS
		log.odds.ratio (model coefficients)			adj.p
GO.ID	blocksize	TR	RS	inter	TR	RS	inter	new	GO.name
GO:0006519	192	2.40616	0.430364	-0.883654	0.661221	0.0194741	0.576426	yes	amino acid and derivative metabolic process
GO:0009308	194	2.41471	0.406898	-0.887179	0.652277	0.0289736	0.566017	yes	amine metabolic process
GO:0000746	71	-11.4814	-0.725037	3.16681	0.0603205	0.0228093	0.0288294	yes	conjugation
GO:0000747	70	-11.3907	-0.74455	3.15839	0.0603205	0.0198399	0.0288294	yes	conjugation with cellular fusion
GO:0007166	36	-5.85523	-0.975061	1.86216	0.722757	0.0386442	0.608501	yes	cell surface receptor linked signal transduction
GO:0019953	72	-11.875	-0.818125	3.28781	0.0413464	0.0102	0.0211906	yes	sexual reproduction
GO:0031137	18	-7.31746	-1.60981	2.53719	0.580388	0.0161862	0.390881	yes	regulation of conjugation with cellular fusion
GO:0032005	18	-7.31746	-1.60981	2.53719	0.580388	0.0161862	0.390881	yes	signal transduction during conjugation with cellular fusion
GO:0046999	18	-7.31746	-1.60981	2.53719	0.580388	0.0161862	0.390881	yes	regulation of conjugation
GO:0051704	82	-11.9837	-0.685314	3.23067	0.0382083	0.0204021	0.0240956	yes	multi-organism process
GO:0000750	18	-7.31746	-1.60981	2.53719	0.580388	0.0161862	0.390881	yes	pheromone-dependent signal transduction during conjugation with cellular fusion
GO:0009063	20	5.11175	1.03888	-1.7494	0.589404	0.0311794	0.683231	yes	amino acid catabolic process
GO:0000819	41	-30.4851	-0.873791	7.0965	0.0216635	0.0326559	0.0211906	yes	sister chromatid segregation
GO:0000054	18	-6.33791	-1.35244	1.94359	0.95016	0.0494455	0.954515	yes	ribosome export from nucleus
GO:0033750	18	-6.33791	-1.35244	1.94359	0.95016	0.0494455	0.954515	yes	ribosome localization
GO:0033753	18	-6.33791	-1.35244	1.94359	0.95016	0.0494455	0.954515	yes	establishment of ribosome localization
GO:0006487	37	-8.83547	-1.01188	2.34172	0.700852	0.0311794	0.739439	yes	protein amino acid N-linked glycosylation
GO:0030435	101	4.76238	0.561395	-1.97888	0.426284	0.0194741	0.265988	yes	sporulation
GO:0006497	33	-14.2229	-1.02025	3.74611	0.387669	0.0311794	0.310517	yes	protein amino acid lipidation
GO:0042157	33	-14.2229	-1.02025	3.74611	0.387669	0.0311794	0.310517	yes	lipoprotein metabolic process
GO:0042158	33	-14.2229	-1.02025	3.74611	0.387669	0.0311794	0.310517	yes	lipoprotein biosynthetic process
GO:0007062	23	-35.5888	-1.23569	7.672	0.455951	0.0386442	0.578119	yes	sister chromatid cohesion
GO:0009072	22	7.42685	1.05798	-3.32018	0.792751	0.0221842	0.618965	yes	aromatic amino acid family metabolic process
GO:0009081	20	5.35177	1.11094	-1.69612	0.455951	0.0193063	0.580025	yes	branched chain family amino acid metabolic process
GO:0007064	15	-65.4918	-1.42161	14.169	0.188945	0.034943	0.176999	yes	mitotic sister chromatid cohesion
GO:0050793	15	-15.226	-1.51918	4.16384	0.578958	0.0311794	0.516251	yes	regulation of developmental process
GO:0006100	17	5.29495	1.19454	-1.58485	0.455951	0.0182211	0.610485	yes	tricarboxylic acid cycle intermediate metabolic process
GO:0006071	12	4.12452	1.25635	-1.02492	0.730092	0.0386442	0.954515	yes	glycerol metabolic process
GO:0022607	321	3.20016	-0.675818	-1.00952	0.169799	9.81103e-06	0.29498	no	cellular component assembly
GO:0065003	235	2.61853	-0.896462	-0.670386	0.418899	3.19337e-07	0.636244	no	macromolecular complex assembly
GO:0006082	280	0.581964	0.556898	-0.183646	0.992368	0.000129446	0.999922	no	organic acid metabolic process
GO:0006520	183	2.43745	0.451519	-0.873698	0.650886	0.0171459	0.578119	no	amino acid metabolic process
GO:0006807	215	2.55551	0.438356	-1.01115	0.609509	0.0136344	0.461424	no	nitrogen compound metabolic process
GO:0019752	280	0.581964	0.556898	-0.183646	0.992368	0.000129446	0.999922	no	carboxylic acid metabolic process
GO:0006366	213	0.158787	-0.633245	-0.366311	0.992368	0.000961679	0.999922	no	transcription from RNA polymerase II promoter
GO:0006325	178	8.00572	-0.472262	-3.09403	0.00126532	0.0311794	0.00545555	no	establishment and/or maintenance of chromatin architecture
GO:0006357	142	-0.322497	-0.600956	-0.353523	0.992368	0.0176346	0.999922	no	regulation of transcription from RNA polymerase II promoter
GO:0016568	149	2.17535	-0.639179	-1.61466	0.992368	0.0110596	0.842127	no	chromatin modification
GO:0009056	349	-0.537732	0.339876	0.152473	0.992368	0.0194741	0.999922	no	catabolic process
GO:0044248	329	-0.206072	0.378612	0.0901183	0.992368	0.0113747	0.999922	no	cellular catabolic process
GO:0009059	402	0.661226	-0.489232	0.264991	0.992368	0.000468305	0.954515	no	macromolecule biosynthetic process
GO:0000278	204	-6.84431	-0.751975	1.59973	0.375708	0.000124663	0.532496	no	mitotic cell cycle
GO:0051726	90	-7.52467	-0.92692	1.68187	0.700852	0.00263419	0.954515	no	regulation of cell cycle
GO:0005975	193	-0.318017	0.868779	0.0142661	0.992368	8.89721e-08	0.999922	no	carbohydrate metabolic process
GO:0005996	84	-0.877163	0.974339	0.374621	0.992368	7.85529e-05	0.999922	no	monosaccharide metabolic process
GO:0006066	143	-0.967462	0.764128	0.312779	0.992368	0.000107372	0.999922	no	alcohol metabolic process
GO:0044262	163	-0.0767537	0.882092	-0.0725641	0.998697	5.76317e-07	0.999922	no	cellular carbohydrate metabolic process
GO:0019318	81	-1.02723	0.92852	0.425678	0.992368	0.000208672	0.999922	no	hexose metabolic process
GO:0006396	277	-5.40051	-1.46853	1.41266	0.348333	6.85728e-20	0.459342	no	RNA processing
GO:0008033	66	-0.882361	-0.919685	0.123636	0.992368	0.012771	0.999922	no	tRNA processing
GO:0009451	50	-1.41643	-1.49208	-0.40805	0.992368	0.00079122	0.999922	no	RNA modification
GO:0006400	34	-5.92637	-1.21742	1.21124	0.992368	0.0256787	0.999922	no	tRNA modification
GO:0006401	49	-0.393936	-1.02182	0.0388003	0.992368	0.0161862	0.999922	no	RNA catabolic process
GO:0006402	42	0.0407514	-1.00464	-0.00625206	0.998859	0.0266523	0.999922	no	mRNA catabolic process
GO:0016071	140	-2.18761	-0.781341	0.575433	0.992368	0.000841031	0.999922	no	mRNA metabolic process
GO:0006397	106	-3.21877	-0.817901	0.904208	0.929409	0.00277565	0.954515	no	mRNA processing
GO:0051325	70	-4.71754	-0.884688	1.03236	0.967964	0.0159251	0.999922	no	interphase
GO:0051329	70	-4.71754	-0.884688	1.03236	0.967964	0.0159251	0.999922	no	interphase of mitotic cell cycle
GO:0006486	60	-7.69682	-0.933346	1.80074	0.794443	0.0161862	0.954515	no	protein amino acid glycosylation
GO:0009100	65	-2.6067	-0.869073	0.53661	0.992368	0.0194741	0.999922	no	glycoprotein metabolic process
GO:0009101	64	-2.69965	-0.896469	0.587163	0.992368	0.0176346	0.999922	no	glycoprotein biosynthetic process
GO:0043413	60	-7.69682	-0.933346	1.80074	0.794443	0.0161862	0.954515	no	biopolymer glycosylation
GO:0000087	119	-9.81901	-0.869993	2.40298	0.280504	0.000468305	0.390881	no	M phase of mitotic cell cycle
GO:0007067	118	-9.73506	-0.876555	2.33385	0.348333	0.000511125	0.459342	no	mitosis
GO:0007088	28	-15.7289	-1.30275	3.79465	0.580388	0.0176346	0.739439	no	regulation of mitosis
GO:0016072	126	-5.48449	-1.89697	1.37077	0.715724	2.90241e-14	0.954515	no	rRNA metabolic process
GO:0022613	244	-4.68892	-1.77604	1.60949	0.0758192	1.855e-26	0.0288294	no	ribonucleoprotein complex biogenesis and assembly
GO:0042254	189	-5.04763	-1.90953	1.75033	0.0918953	2.78485e-24	0.0300573	no	ribosome biogenesis and assembly
GO:0006364	121	-5.45678	-1.96331	1.41397	0.702777	1.17532e-14	0.93772	no	rRNA processing
GO:0022618	100	-2.57669	-1.4598	1.13458	0.70178	2.15778e-08	0.390881	no	protein-RNA complex assembly
GO:0006413	40	-2.2188	-1.47137	0.968921	0.992368	0.000754815	0.954515	no	translational initiation
GO:0032787	101	-1.76822	0.747549	0.580822	0.992368	0.00154905	0.999922	no	monocarboxylic acid metabolic process
GO:0006006	63	-1.36745	0.954655	0.610767	0.992368	0.000808549	0.999922	no	glucose metabolic process
GO:0006007	43	0.0212048	1.22956	0.34786	0.998859	0.00017975	0.999922	no	glucose catabolic process
GO:0016052	59	-1.20461	1.08666	0.548685	0.992368	0.000145649	0.999922	no	carbohydrate catabolic process
GO:0019320	46	-0.435515	1.15673	0.443774	0.992368	0.000342034	0.999922	no	hexose catabolic process
GO:0044275	59	-1.20461	1.08666	0.548685	0.992368	0.000145649	0.999922	no	cellular carbohydrate catabolic process
GO:0046164	51	-0.863994	1.15214	0.558823	0.992368	0.000172339	0.999922	no	alcohol catabolic process
GO:0046365	48	-0.147058	1.2485	0.352182	0.992368	6.61525e-05	0.999922	no	monosaccharide catabolic process
GO:0006090	29	-0.147724	1.15043	0.453689	0.992368	0.00793564	0.999922	no	pyruvate metabolic process
GO:0006096	32	-0.929891	1.12651	0.645218	0.992368	0.00622311	0.999922	no	glycolysis
GO:0009310	23	5.52927	1.09304	-1.98687	0.557729	0.0153137	0.605078	no	amine catabolic process
GO:0044270	23	5.52927	1.09304	-1.98687	0.557729	0.0153137	0.605078	no	nitrogen compound catabolic process
GO:0006730	49	-5.69846	-0.860894	1.4982	0.929409	0.0397213	0.954515	no	one-carbon compound metabolic process
GO:0006084	29	5.12061	1.34992	-1.64656	0.455951	0.000131818	0.516251	no	acetyl-CoA metabolic process
GO:0006732	102	0.204221	0.628696	-0.101748	0.992368	0.012771	0.999922	no	coenzyme metabolic process
GO:0051186	128	0.449863	0.584507	-0.104544	0.992368	0.00904769	0.999922	no	cofactor metabolic process
GO:0006091	200	1.49992	0.3975	-0.233828	0.803359	0.0311794	0.999922	no	generation of precursor metabolites and energy
GO:0006113	14	5.75521	1.41063	-1.75867	0.455951	0.0078047	0.610485	no	fermentation
GO:0015980	102	2.73166	0.57543	-0.66454	0.482152	0.0177132	0.703014	no	energy derivation by oxidation of organic compounds
GO:0019751	13	4.347	1.38038	-1.11086	0.661221	0.0156542	0.918023	no	polyol metabolic process
GO:0006536	13	3.20791	1.29824	-0.861431	0.992368	0.0266523	0.999922	no	glutamate metabolic process
GO:0009084	25	3.7822	0.979446	-1.30345	0.929409	0.0289736	0.954515	no	glutamine family amino acid biosynthetic process
GO:0006537	11	3.27893	1.36892	-0.874621	0.992368	0.0289736	0.999922	no	glutamate biosynthetic process
GO:0006260	80	-20.3534	-0.970072	4.99157	0.0047781	0.000639389	0.00592322	no	DNA replication
GO:0006261	56	-25.1491	-1.31375	6.27771	0.00345613	8.89279e-05	0.00545555	no	DNA-dependent DNA replication
GO:0006766	67	-1.012	0.629373	0.232712	0.992368	0.0452943	0.999922	no	vitamin metabolic process
GO:0006767	67	-1.012	0.629373	0.232712	0.992368	0.0452943	0.999922	no	water-soluble vitamin metabolic process
GO:0032259	34	0.539983	-1.20829	-1.23372	0.992368	0.0311794	0.999922	no	methylation
GO:0043414	34	0.539983	-1.20829	-1.23372	0.992368	0.0311794	0.999922	no	biopolymer methylation
GO:0006338	99	1.02793	-0.84342	-1.39102	0.992368	0.00805463	0.999922	no	chromatin remodeling
GO:0040029	64	0.255288	-0.884752	-0.800626	0.992368	0.0228093	0.999922	no	regulation of gene expression
GO:0048519	146	-0.0685449	-0.519964	-0.424082	0.998859	0.0363075	0.999922	no	negative regulation of biological process
GO:0048523	145	-0.175579	-0.510382	-0.393783	0.992368	0.0419261	0.999922	no	negative regulation of cellular process
GO:0005984	15	-70.6944	1.26307	12.405	0.487402	0.0480067	0.608501	no	disaccharide metabolic process
GO:0008645	15	-1.40623	1.40009	0.0159296	0.992368	0.0177132	0.999922	no	hexose transport
GO:0015749	15	-1.40623	1.40009	0.0159296	0.992368	0.0177132	0.999922	no	monosaccharide transport
GO:0042255	44	-2.49318	-1.80218	1.31123	0.821052	1.40482e-05	0.390881	no	ribosome assembly
GO:0042257	35	-2.11023	-1.72754	1.25251	0.929409	0.000275441	0.393321	no	ribosomal subunit assembly
GO:0006094	21	-0.303053	1.11446	0.573383	0.992368	0.0326559	0.999922	no	gluconeogenesis
GO:0019319	25	-0.14239	0.980429	0.499557	0.992368	0.0456772	0.999922	no	hexose biosynthetic process
GO:0046165	30	1.84998	1.14097	-0.0536823	0.992368	0.00602323	0.999922	no	alcohol biosynthetic process
GO:0046364	25	-0.14239	0.980429	0.499557	0.992368	0.0456772	0.999922	no	monosaccharide biosynthetic process
GO:0006739	16	2.55488	1.46045	-0.488631	0.992368	0.00396211	0.999922	no	NADP metabolic process
GO:0006740	14	3.10701	1.61313	-0.581772	0.954293	0.0016695	0.999922	no	NADPH regeneration
GO:0006769	35	-0.601866	0.893124	0.316692	0.992368	0.0287311	0.999922	no	nicotinamide metabolic process
GO:0019362	36	-0.832882	0.864785	0.366374	0.992368	0.0311794	0.999922	no	pyridine nucleotide metabolic process
GO:0006098	13	2.5488	1.45751	-0.390805	0.992368	0.012771	0.999922	no	pentose-phosphate shunt
GO:0006067	10	3.52932	1.78707	-1.08062	0.992368	0.00277565	0.999922	no	ethanol metabolic process
GO:0016042	25	18.8142	1.09188	-10.5349	0.954293	0.0289736	0.610485	no	lipid catabolic process
GO:0042273	42	-4.78766	-2.86017	2.04487	0.466338	4.50948e-12	0.144163	no	ribosomal large subunit biogenesis and assembly
GO:0000154	15	16.0447	-2.20976	-8.61993	0.95016	0.0177537	0.948477	no	rRNA modification
GO:0006081	15	-0.836419	1.38804	0.0111726	0.992368	0.0176346	0.999922	no	aldehyde metabolic process
GO:0009109	26	4.87954	1.29592	-1.52136	0.487402	0.000639389	0.580025	no	coenzyme catabolic process
GO:0046356	25	4.97157	1.35014	-1.52225	0.466338	0.000407161	0.566017	no	acetyl-CoA catabolic process
GO:0051187	27	4.76834	1.39717	-1.45542	0.487402	0.000129446	0.587362	no	cofactor catabolic process
GO:0006099	25	4.97157	1.35014	-1.52225	0.466338	0.000407161	0.566017	no	tricarboxylic acid cycle
GO:0030490	34	-12.2971	-2.32345	3.35579	0.557729	7.42734e-07	0.618965	no	maturation of SSU-rRNA
GO:0000027	25	-3.08533	-2.37904	1.59843	0.792751	2.61675e-05	0.37691	no	ribosomal large subunit assembly and maintenance
GO:0044242	15	19.6507	1.51161	-9.69147	0.557717	0.0018633	0.434386	no	cellular lipid catabolic process
GO:0043681	26	0.45663	-1.40261	0.20987	0.992368	0.0161862	0.999922	no	protein import into mitochondrion
GO:0000114	10	-5.91887	-2.25269	1.87863	0.992368	0.0194741	0.999922	no	G1-specific transcription in mitotic cell cycle

## Sheet: Interaction_effect
Logistic model using 2 independent variables and interaction term
TR: Transcription Rate
RS: mRNA Stability
Inter: interaction term
known: is the term already known from the univariate analysis?
	Biological Processes significant in the Ineraction Term
		log.odds.ratio (model coefficients)			adj.p
GO.ID	blocksize	TR	RS	inter	TR	RS	inter	new	GO.name
GO:0000746	71	-11.4814	-0.725037	3.16681	0.0603205	0.0228093	0.0288294	yes	conjugation
GO:0000747	70	-11.3907	-0.74455	3.15839	0.0603205	0.0198399	0.0288294	yes	conjugation with cellular fusion
GO:0019953	72	-11.875	-0.818125	3.28781	0.0413464	0.0102	0.0211906	yes	sexual reproduction
GO:0042221	219	-6.65472	-0.1209	2.04667	0.0171835	0.59895	0.00545555	yes	response to chemical stimulus
GO:0051704	82	-11.9837	-0.685314	3.23067	0.0382083	0.0204021	0.0240956	yes	multi-organism process
GO:0000819	41	-30.4851	-0.873791	7.0965	0.0216635	0.0326559	0.0211906	yes	sister chromatid segregation
GO:0000070	39	-30.2262	-0.778138	7.00773	0.0311513	0.0703928	0.0276588	yes	mitotic sister chromatid segregation
GO:0019725	111	-9.12771	-0.377209	2.70557	0.0171835	0.154998	0.00545555	yes	cellular homeostasis
GO:0042592	116	-8.75137	-0.299149	2.5886	0.0216635	0.265154	0.00575629	yes	homeostatic process
GO:0065004	64	12.1171	-0.488745	-4.60467	0.00345613	0.21226	0.0187953	no	protein-DNA complex assembly
GO:0006325	178	8.00572	-0.472262	-3.09403	0.00126532	0.0311794	0.00545555	no	establishment and/or maintenance of chromatin architecture
GO:0022613	244	-4.68892	-1.77604	1.60949	0.0758192	1.855e-26	0.0288294	no	ribonucleoprotein complex biogenesis and assembly
GO:0042254	189	-5.04763	-1.90953	1.75033	0.0918953	2.78485e-24	0.0300573	no	ribosome biogenesis and assembly
GO:0006260	80	-20.3534	-0.970072	4.99157	0.0047781	0.000639389	0.00592322	no	DNA replication
GO:0006261	56	-25.1491	-1.31375	6.27771	0.00345613	8.89279e-05	0.00545555	no	DNA-dependent DNA replication
GO:0006323	84	12.6316	-0.484278	-4.96125	0.00126532	0.145087	0.00575629	no	DNA packaging
GO:0006333	88	12.4442	-0.398392	-4.8392	0.00126532	0.228278	0.00545555	no	chromatin assembly or disassembly
GO:0031497	79	12.5132	-0.442726	-4.83919	0.00126532	0.20386	0.00575629	no	chromatin assembly

## Sheet: individual_TR
Logistic model using just one independent variable
TR: Transcription Rate
GO.ID	blocksize	TR log.odds.ratio (model coefficient)	adj.p	GO.name
GO:0065003	235	0.732921	0.0148164	macromolecular complex assembly
GO:0065004	64	1.22651	0.0033786	protein-DNA complex assembly
GO:0016192	255	-1.20919	0.0323894	vesicle-mediated transport
GO:0032200	195	0.711609	0.0305381	telomere organization and biogenesis
GO:0000723	195	0.711609	0.0305381	telomere maintenance
GO:0006629	191	-1.40944	0.0427047	lipid metabolic process
GO:0016568	149	-2.47435	0.0141904	chromatin modification
GO:0006259	234	-1.41592	0.0224224	DNA metabolic process
GO:0009059	402	1.43405	5.97885e-16	macromolecule biosynthetic process
GO:0043687	316	-1.78872	0.00167181	post-translational protein modification
GO:0000278	204	-1.94259	0.0103751	mitotic cell cycle
GO:0051301	253	-1.61861	0.0103751	cell division
GO:0006412	284	1.93166	7.79652e-26	translation
GO:0006468	91	-6.60855	0.00215798	protein amino acid phosphorylation
GO:0006396	277	-1.42239	0.0144281	RNA processing
GO:0022402	293	-2.87099	3.24366e-05	cell cycle process
GO:0022403	257	-3.08071	6.19948e-05	cell cycle phase
GO:0000087	119	-2.32787	0.0305381	M phase of mitotic cell cycle
GO:0000279	200	-3.75269	0.000128231	M phase
GO:0007067	118	-2.51152	0.0250742	mitosis
GO:0051056	15	-38.168	0.0398541	regulation of small GTPase mediated signal transduction
GO:0006310	63	-4.6101	0.0305381	DNA recombination
GO:0006007	43	1.24714	0.0144281	glucose catabolic process
GO:0019320	46	1.14716	0.025372	hexose catabolic process
GO:0046164	51	1.13862	0.0202475	alcohol catabolic process
GO:0046365	48	1.11335	0.0305381	monosaccharide catabolic process
GO:0006090	29	1.43794	0.00966615	pyruvate metabolic process
GO:0006096	32	1.36668	0.0141904	glycolysis
GO:0006457	96	1.05914	0.00595948	protein folding
GO:0006091	200	0.777871	0.0145627	generation of precursor metabolites and energy
GO:0006260	80	-3.60518	0.0285222	DNA replication
GO:0006302	34	-9.74867	0.0398541	double-strand break repair
GO:0055086	130	0.999517	0.0033786	nucleobase
GO:0006163	54	1.13737	0.0171971	purine nucleotide metabolic process
GO:0006753	116	0.979735	0.00833358	nucleoside phosphate metabolic process
GO:0009117	116	0.979735	0.00833358	nucleotide metabolic process
GO:0009165	77	0.956103	0.0323894	nucleotide biosynthetic process
GO:0006164	54	1.13737	0.0171971	purine nucleotide biosynthetic process
GO:0009150	47	1.20429	0.0148164	purine ribonucleotide metabolic process
GO:0009152	47	1.20429	0.0148164	purine ribonucleotide biosynthetic process
GO:0009259	50	1.18913	0.0145627	ribonucleotide metabolic process
GO:0009260	50	1.18913	0.0145627	ribonucleotide biosynthetic process
GO:0006323	84	0.916729	0.0376495	DNA packaging
GO:0006333	88	0.899824	0.0384522	chromatin assembly or disassembly
GO:0031497	79	1.02039	0.0171971	chromatin assembly
GO:0006334	22	2.45737	1.77728e-10	nucleosome assembly
GO:0051321	106	-5.64384	0.00167181	meiotic cell cycle
GO:0051327	106	-5.64384	0.00167181	M phase of meiotic cell cycle
GO:0007126	106	-5.64384	0.00167181	meiosis
GO:0009141	33	1.3985	0.00870443	nucleoside triphosphate metabolic process
GO:0009142	32	1.27279	0.025372	nucleoside triphosphate biosynthetic process
GO:0009199	32	1.27279	0.025372	ribonucleoside triphosphate metabolic process
GO:0009201	32	1.27279	0.025372	ribonucleoside triphosphate biosynthetic process
GO:0006338	99	-2.98955	0.0250742	chromatin remodeling
GO:0009144	30	1.33645	0.0172372	purine nucleoside triphosphate metabolic process
GO:0009145	30	1.33645	0.0172372	purine nucleoside triphosphate biosynthetic process
GO:0009205	30	1.33645	0.0172372	purine ribonucleoside triphosphate metabolic process
GO:0009206	30	1.33645	0.0172372	purine ribonucleoside triphosphate biosynthetic process
GO:0046034	27	1.41716	0.0144281	ATP metabolic process
GO:0006119	47	1.46392	0.000649793	oxidative phosphorylation
GO:0006754	27	1.41716	0.0144281	ATP biosynthetic process
GO:0015985	27	1.41716	0.0144281	energy coupled proton transport
GO:0015986	27	1.41716	0.0144281	ATP synthesis coupled proton transport
GO:0045454	23	1.46012	0.0152055	cell redox homeostasis
GO:0042255	44	1.21767	0.0162802	ribosome assembly
GO:0042257	35	1.45378	0.0033786	ribosomal subunit assembly
GO:0006094	21	1.68513	0.00235417	gluconeogenesis
GO:0019319	25	1.57598	0.0033786	hexose biosynthetic process
GO:0046165	30	1.62409	0.000814655	alcohol biosynthetic process
GO:0046364	25	1.57598	0.0033786	monosaccharide biosynthetic process
GO:0007127	35	-10.0217	0.0344768	meiosis I
GO:0006414	15	1.75616	0.00520086	translational elongation
GO:0016042	25	-14.9434	0.0467813	lipid catabolic process
GO:0009116	17	1.45327	0.0384522	nucleoside metabolic process
GO:0000023	10	-91.1772	0.0250742	maltose metabolic process
GO:0000027	25	1.33931	0.0305381	ribosomal large subunit assembly and maintenance
GO:0010038	13	1.56934	0.0350097	response to metal ion
GO:0042773	19	1.5146	0.0171971	ATP synthesis coupled electron transport
GO:0042775	19	1.5146	0.0171971	organelle ATP synthesis coupled electron transport
GO:0030150	18	1.40882	0.0464477	protein import into mitochondrial matrix

## Sheet: individual_RS
Logistic model using just one independent variable
RS: mRNA Stability
GO.ID	blocksize	RS log.odds.ratio (model coefficient)	adj.p	GO.name
GO:0006352	39	-0.927877	0.0138865	transcription initiation
GO:0022607	321	-0.849401	1.22091e-12	cellular component assembly
GO:0065003	235	-1.02574	2.70861e-13	macromolecular complex assembly
GO:0065004	64	-1.29687	3.02914e-06	protein-DNA complex assembly
GO:0032940	190	-0.339157	0.0457874	secretion by cell
GO:0045045	186	-0.355151	0.0393534	secretory pathway
GO:0046903	190	-0.339157	0.0457874	secretion
GO:0032200	195	-0.363965	0.0285468	telomere organization and biogenesis
GO:0000723	195	-0.363965	0.0285468	telomere maintenance
GO:0006082	280	0.527392	3.56142e-06	organic acid metabolic process
GO:0006520	183	0.319209	0.0459825	amino acid metabolic process
GO:0006807	215	0.294531	0.0475438	nitrogen compound metabolic process
GO:0019752	280	0.527392	3.56142e-06	carboxylic acid metabolic process
GO:0006366	213	-0.688021	3.06235e-06	transcription from RNA polymerase II promoter
GO:0006325	178	-0.916892	1.50831e-08	establishment and/or maintenance of chromatin architecture
GO:0006357	142	-0.654312	0.00049325	regulation of transcription from RNA polymerase II promoter
GO:0016568	149	-0.808122	5.01124e-06	chromatin modification
GO:0006974	176	-0.364202	0.0395285	response to DNA damage stimulus
GO:0009719	180	-0.379986	0.0282008	response to endogenous stimulus
GO:0009056	349	0.363457	0.000988047	catabolic process
GO:0044248	329	0.394492	0.000484985	cellular catabolic process
GO:0009059	402	-0.395658	0.000420414	macromolecule biosynthetic process
GO:0000075	35	-0.923093	0.0214547	cell cycle checkpoint
GO:0000278	204	-0.602988	8.67667e-05	mitotic cell cycle
GO:0007093	22	-1.05898	0.0420434	mitotic cell cycle checkpoint
GO:0007346	32	-1.02411	0.0144826	regulation of mitotic cell cycle
GO:0051726	90	-0.790309	0.000875653	regulation of cell cycle
GO:0051301	253	-0.332623	0.0217377	cell division
GO:0006412	284	-0.27788	0.0460154	translation
GO:0005975	193	0.867872	6.23274e-12	carbohydrate metabolic process
GO:0005996	84	1.04507	1.40479e-08	monosaccharide metabolic process
GO:0006066	143	0.816266	3.27431e-08	alcohol metabolic process
GO:0044262	163	0.868003	2.43932e-10	cellular carbohydrate metabolic process
GO:0006468	91	-0.487932	0.0474712	protein amino acid phosphorylation
GO:0019318	81	1.00954	7.39516e-08	hexose metabolic process
GO:0006396	277	-1.31099	1.38514e-23	RNA processing
GO:0008033	66	-0.908339	0.00106779	tRNA processing
GO:0009451	50	-1.54861	1.12298e-06	RNA modification
GO:0006400	34	-1.12739	0.00466592	tRNA modification
GO:0006401	49	-1.01872	0.00171756	RNA catabolic process
GO:0006402	42	-1.00549	0.00466592	mRNA catabolic process
GO:0016071	140	-0.706468	0.000161497	mRNA metabolic process
GO:0006397	106	-0.698065	0.00126421	mRNA processing
GO:0031123	26	-1.26145	0.0064759	RNA 3'-end processing
GO:0031124	19	-1.42356	0.0099274	mRNA 3'-end processing
GO:0000080	17	-1.17612	0.0488221	G1 phase of mitotic cell cycle
GO:0051318	17	-1.17612	0.0488221	G1 phase
GO:0051325	70	-0.792098	0.00335443	interphase
GO:0051329	70	-0.792098	0.00335443	interphase of mitotic cell cycle
GO:0006486	60	-0.779414	0.00863946	protein amino acid glycosylation
GO:0009100	65	-0.816313	0.00370203	glycoprotein metabolic process
GO:0009101	64	-0.836131	0.0031839	glycoprotein biosynthetic process
GO:0043413	60	-0.779414	0.00863946	biopolymer glycosylation
GO:0000087	119	-0.654394	0.00130112	M phase of mitotic cell cycle
GO:0007067	118	-0.675172	0.00102055	mitosis
GO:0007088	28	-1.03461	0.0219457	regulation of mitosis
GO:0010458	19	-1.46858	0.00782726	exit from mitosis
GO:0007096	19	-1.46858	0.00782726	regulation of exit from mitosis
GO:0016072	126	-1.76067	6.03459e-19	rRNA metabolic process
GO:0022613	244	-1.50544	4.34917e-26	ribonucleoprotein complex biogenesis and assembly
GO:0042254	189	-1.61226	1.38514e-23	ribosome biogenesis and assembly
GO:0006364	121	-1.81732	4.09274e-19	rRNA processing
GO:0022618	100	-1.19775	4.37991e-08	protein-RNA complex assembly
GO:0006413	40	-1.26456	0.000567642	translational initiation
GO:0032787	101	0.848891	1.12298e-06	monocarboxylic acid metabolic process
GO:0006006	63	1.08294	2.48175e-07	glucose metabolic process
GO:0006007	43	1.31199	6.44163e-08	glucose catabolic process
GO:0016052	59	1.19866	1.50885e-08	carbohydrate catabolic process
GO:0019320	46	1.25976	1.01413e-07	hexose catabolic process
GO:0044275	59	1.19866	1.50885e-08	cellular carbohydrate catabolic process
GO:0046164	51	1.27927	1.40479e-08	alcohol catabolic process
GO:0046365	48	1.32812	9.10111e-09	monosaccharide catabolic process
GO:0006090	29	1.26768	2.50593e-05	pyruvate metabolic process
GO:0006096	32	1.28662	5.32766e-06	glycolysis
GO:0008361	85	-0.523876	0.0405617	regulation of cell size
GO:0030447	67	-0.615372	0.032719	filamentous growth
GO:0043631	16	-1.30267	0.0358595	RNA polyadenylation
GO:0022411	22	-1.14492	0.0273145	cellular component disassembly
GO:0032984	21	-1.09539	0.0405617	macromolecular complex disassembly
GO:0043241	19	-1.13491	0.0439051	protein complex disassembly
GO:0043624	19	-1.13491	0.0439051	cellular protein complex disassembly
GO:0006378	11	-1.91071	0.0109955	mRNA polyadenylation
GO:0006379	11	-1.75414	0.0204869	mRNA cleavage
GO:0009310	23	0.827282	0.0405617	amine catabolic process
GO:0044270	23	0.827282	0.0405617	nitrogen compound catabolic process
GO:0006730	49	-0.694736	0.0414521	one-carbon compound metabolic process
GO:0007020	15	-1.32647	0.0394939	microtubule nucleation
GO:0006084	29	1.10099	0.000577793	acetyl-CoA metabolic process
GO:0006732	102	0.611641	0.00116813	coenzyme metabolic process
GO:0051186	128	0.568459	0.000884646	cofactor metabolic process
GO:0006091	200	0.355633	0.016813	generation of precursor metabolites and energy
GO:0006113	14	1.10357	0.0214043	fermentation
GO:0015980	102	0.442258	0.0326975	energy derivation by oxidation of organic compounds
GO:0019751	13	1.15028	0.0192139	polyol metabolic process
GO:0006536	13	1.15115	0.0191974	glutamate metabolic process
GO:0009084	25	0.793012	0.0420169	glutamine family amino acid biosynthetic process
GO:0006537	11	1.22003	0.02065	glutamate biosynthetic process
GO:0017038	68	-0.662739	0.0190904	protein import
GO:0006260	80	-0.570405	0.0291905	DNA replication
GO:0006261	56	-0.813872	0.00834504	DNA-dependent DNA replication
GO:0022616	24	-1.19631	0.0144826	DNA strand elongation
GO:0006271	24	-1.19631	0.0144826	DNA strand elongation during DNA replication
GO:0000910	75	-0.617317	0.0214547	cytokinesis
GO:0006766	67	0.661516	0.00447983	vitamin metabolic process
GO:0006767	67	0.661516	0.00447983	water-soluble vitamin metabolic process
GO:0006323	84	-1.23604	2.54516e-07	DNA packaging
GO:0006333	88	-1.13784	1.12298e-06	chromatin assembly or disassembly
GO:0031497	79	-1.21285	1.06804e-06	chromatin assembly
GO:0006334	22	-2.38698	3.02914e-06	nucleosome assembly
GO:0008643	29	0.892629	0.00877862	carbohydrate transport
GO:0001510	14	-1.71902	0.00863946	RNA methylation
GO:0032259	34	-1.3372	0.000875653	methylation
GO:0043414	34	-1.3372	0.000875653	biopolymer methylation
GO:0030488	11	-1.66954	0.0280225	tRNA methylation
GO:0006338	99	-0.985988	6.94614e-06	chromatin remodeling
GO:0006342	61	-0.948917	0.00105375	chromatin silencing
GO:0009892	124	-0.552066	0.0064759	negative regulation of metabolic process
GO:0016458	61	-0.948917	0.00105375	gene silencing
GO:0016481	98	-0.690625	0.00220121	negative regulation of transcription
GO:0031324	123	-0.536843	0.00863946	negative regulation of cellular metabolic process
GO:0031507	61	-0.948917	0.00105375	heterochromatin formation
GO:0031509	36	-1.18785	0.00195779	telomeric heterochromatin formation
GO:0040029	64	-0.981409	0.000567642	regulation of gene expression
GO:0045814	61	-0.948917	0.00105375	negative regulation of gene expression
GO:0045892	94	-0.698053	0.00251413	negative regulation of transcription
GO:0045934	109	-0.601116	0.00533173	negative regulation of nucleobase
GO:0048519	146	-0.581337	0.00152033	negative regulation of biological process
GO:0048523	145	-0.568421	0.00201926	negative regulation of cellular process
GO:0051253	95	-0.689315	0.00269394	negative regulation of RNA metabolic process
GO:0006348	36	-1.18785	0.00195779	chromatin silencing at telomere
GO:0030466	18	-1.18262	0.0420169	chromatin silencing at silent mating-type cassette
GO:0032268	50	-0.702914	0.0373625	regulation of cellular protein metabolic process
GO:0016051	55	0.783005	0.00152033	carbohydrate biosynthetic process
GO:0006367	32	-1.00499	0.0166415	transcription initiation from RNA polymerase II promoter
GO:0005984	15	1.78385	2.97643e-06	disaccharide metabolic process
GO:0006733	47	0.767659	0.00466592	oxidoreduction coenzyme metabolic process
GO:0008645	15	1.39459	0.000875653	hexose transport
GO:0015749	15	1.39459	0.000875653	monosaccharide transport
GO:0042244	22	0.831926	0.0437396	spore wall assembly
GO:0030476	22	0.831926	0.0437396	fungal-type spore wall assembly
GO:0018193	21	-1.11266	0.0379755	peptidyl-amino acid modification
GO:0009607	31	0.817097	0.0162949	response to biotic stimulus
GO:0051789	31	0.817097	0.0162949	response to protein stimulus
GO:0006986	31	0.817097	0.0162949	response to unfolded protein
GO:0042255	44	-1.38837	5.30152e-05	ribosome assembly
GO:0042257	35	-1.2706	0.00113415	ribosomal subunit assembly
GO:0006417	37	-0.837377	0.0336235	regulation of translation
GO:0006360	10	-1.60647	0.0451384	transcription from RNA polymerase I promoter
GO:0006094	21	1.27737	0.000431947	gluconeogenesis
GO:0019319	25	1.12672	0.000988047	hexose biosynthetic process
GO:0046165	30	1.12032	0.000356254	alcohol biosynthetic process
GO:0046364	25	1.12672	0.000988047	monosaccharide biosynthetic process
GO:0006272	12	-1.44105	0.0460154	leading strand elongation
GO:0006739	16	1.36081	0.000875653	NADP metabolic process
GO:0006740	14	1.47974	0.000528269	NADPH regeneration
GO:0006769	35	0.956202	0.00133569	nicotinamide metabolic process
GO:0019362	36	0.935409	0.00153908	pyridine nucleotide metabolic process
GO:0006098	13	1.36244	0.00255033	pentose-phosphate shunt
GO:0006067	10	1.63628	0.000875653	ethanol metabolic process
GO:0043044	14	-1.63626	0.0128813	ATP-dependent chromatin remodeling
GO:0042273	42	-2.35246	9.87265e-11	ribosomal large subunit biogenesis and assembly
GO:0000023	10	1.36337	0.00954117	maltose metabolic process
GO:0000154	15	-2.85831	9.60345e-06	rRNA modification
GO:0006081	15	1.38524	0.000961949	aldehyde metabolic process
GO:0009109	26	1.05339	0.00195779	coenzyme catabolic process
GO:0046356	25	1.10169	0.00128839	acetyl-CoA catabolic process
GO:0051187	27	1.16492	0.000376424	cofactor catabolic process
GO:0006099	25	1.10169	0.00128839	tricarboxylic acid cycle
GO:0030490	34	-2.04063	2.79508e-07	maturation of SSU-rRNA
GO:0000027	25	-1.8315	0.000106493	ribosomal large subunit assembly and maintenance
GO:0044242	15	1.0707	0.0214547	cellular lipid catabolic process
GO:0043681	26	-1.35505	0.00320768	protein import into mitochondrion
GO:0000114	10	-2.01831	0.0109955	G1-specific transcription in mitotic cell cycle
GO:0030150	18	-1.29372	0.0248147	protein import into mitochondrial matrix
